# Supplementary material for: Bulked Segregant RNA-Seq Provides Distinctive Expression Profile Against Powdery Mildew in the Wheat Genotype YD588
Source: Front Plant Sci. 2021 Dec 3;12:764978. doi: 10.3389/fpls.2021.764978 (PMC8677838; doi:10.3389/fpls.2021.764978)
Supplement: Supplementary file 1 [file Table_1.XLSX]

## Sheet: Sheet1
Table S1. Seedling reaction patterns of YD588 and 26 resistance stocks with catalogued Pm genes to 16 Blumeria graminis f. sp. tritici (Bgt) isolates collected from different regions of China. Wheat cultivar Huixianhong, which has no known/effective Pm genes, was used as the susceptible control.
Genotypes	Pm Genes	Y01	Y02	Y03	Y04	Y15	Y06	Y07	Y08	Y09	Y10	Y11	Y14	Y05	Y16	Y17	Y18
YD588	PmYD588	1	1	0	1	2	1	0	1	3	0	1	3	1	1	0	1
Yannong 21	－	4	4	4	4	4	4	4	4	4	4	4	4	4	4	4	4
Huixianhong	－	4	4	4	4	4	4	4	4	4	4	4	4	4	4	4	4
Axminster/8*Cc	Pm1	4	4	4	4	4	4	4	4	4	0	4	4	4	4	3	3
Ulka/8*Cc	Pm2a	0;	4	1	0	0	0	0	0	3	3	0	－	0	0	0	0
Khapli	Pm4a	－	4	0	0	0	0	0	0	3	－	0	0	0	0	3	0
Yuma	Pm4a	0	3	2	0	0	0	0	0	2	－	0	0	0	0	3	0
VPM/7*Bainong/F4	Pm4b	0	－	0	0	0	0	0	－	－	0	－	0	0	0	3	－
VPM	Pm4b	4	4	4	4	3	3	2	4	4	0	1	4	－	－	6	0
CI14125	Pm5	0	0	0	0	－	0	0	0	3	0	0	0	0	0	3	0
Xiaobaidong	Pm5e	0	4	0	3	0	0	0	0	3	3	0	0	0	0	0	0
CI14119	Pm12	0	0	0	0	0	0	0	0	0	0	0	0	0	0	0	0
96-283	Pm16	4	4	0	3	－	－	－	0	3	0	－	4	4	4	－	－
96-285	Pm18	0	－	1	0	－	0	0	0	0	0	0	0	0	0	1	－
96-286	Pm19	0	0	0	0	0	0	0	－	2	0	0	0	0	0	2	－
Yangmai 5/Sub.6V	Pm21	0	0	0	0	0	0	0	0	0	0	0	0	0	0	0	0
Virest	Pm22	0	0	1	－	0	0	0	－	0	0	0	4	0	0	0	0
81-7241	Pm23	0	0	2	1	0	0	0	0	3	0	0	0	0	－	2	0
Chiyacao	Pm24	0	2	－	－	0	－	0	0	1	0	1	0	0	－	－	－
5P27	Pm30	0	0	－	－	－	0	0	0	2	－	0	0	0	0	－	－
Am9/3	Pm33	0	－	2	－	0	0	0	－	－	1	1	0	－	－	3	0
Am4/2	PmPS5A	0	0	0	－	－	0	0	0	－	－	0	2	－	0	－	－
DR147	PmDR147	0	0	0	0	0	0	0	－	－	0	0	－	－	0	2	0
D29	PmD29	－	－	－	－	－	－	0	0	3	－	－	－	0	－	－	－
Xiaohongpi	PmX	0	－	0	0	0	0	0	0	3	0	0	0	0	0	2	0
NCD3	Pm35	0	－	0	0	0	0	0	0	2	0	－	0	0	0	0	0
P63	Pm40	0	0	0	0	0	0	0	0	0	0	0	2	1	0	0	1
2H7165	Pm42	－	－	3	0	0	3	0	0	2	1	－	－	0	0	－	－
CH5025	Pm43	－	－	－	0	－	－	－	0	－	0	0	－	0	－	－	－
Note: Infection types (IT) were scored according to a 0-4 scale, of which 0, 0; 1 and 2 are considered resistant, while those with an IT score of 3 or 4 are considered susceptible.
