# Supplementary material for: Bulked Segregant RNA-Seq Provides Distinctive Expression Profile Against Powdery Mildew in the Wheat Genotype YD588
Source: Front Plant Sci. 2021 Dec 3;12:764978. doi: 10.3389/fpls.2021.764978 (PMC8677838; doi:10.3389/fpls.2021.764978)
Supplement: Supplementary file 3 [file Table_3.XLSX]

## Sheet: snp
Table S3. SNP calling results of the four samples including resistance and susceptible parents YD588 and Yannong 21 (YN21) and their derived resistance and susceptible bulks using YN21 as the reference
#Chr	Pos	Ref	Alt	YN21	Depth	AlleDp	YD588	Depth	AlleDp	Susceptible bulk	Depth	AlleDp	Resistance bulk	Depth	AlleDp	Effect	Codon_change	Gene_id
chr1A	157866	A	G	G	5	0,5	G	5	0,5	G	2	0,2	G	8	0,8	UPSTREAM
chr1A	158007	G	A	G	9	9,0	G	7	7,0	G	2	2,0	R	13	11,2	UPSTREAM
chr1A	158669	A	G	G	3	0,3	G	1	0,1	G	1	0,1	G	5	0,5	UPSTREAM
chr1A	158721	T	C	C	3	0,3	C	1	0,1	C	1	0,1	C	5	0,5	UPSTREAM
chr1A	158771	T	G	G	3	0,3	G	2	0,2	G	5	0,5	G	4	0,4	UPSTREAM
chr1A	159035	G	A	A	2	0,2	A	1	0,1	A	6	0,6	A	7	0,7	UPSTREAM
chr1A	161506	T	C	N	.	.	N	.	.	Y	14	8,6	Y	6	4,2	UPSTREAM
chr1A	161532	C	T	T	3	0,3	T	3	0,3	Y	27	13,14	Y	11	5,6	UPSTREAM
chr1A	231530	A	C	C	2	0,2	N	.	.	N	.	.	C	2	0,2	UPSTREAM
chr1A	244632	T	G	G	1	0,1	G	7	0,7	G	16	0,16	G	18	0,18	UTR_3_PRIME
chr1A	326133	T	C	N	.	.	C	4	0,4	C	8	0,8	C	7	0,7	NON_SYNONYMOUS_CODING	aTg/aCg	TraesCS1A02G001500
chr1A	326305	A	C	C	1	0,1	N	.	.	C	1	0,1	C	5	0,5	SYNONYMOUS_CODING	acA/acC	TraesCS1A02G001500
chr1A	326341	A	G	G	4	0,4	G	8	0,8	G	23	0,23	G	36	0,36	SYNONYMOUS_CODING	tcA/tcG	TraesCS1A02G001500
chr1A	381420	A	G	N	.	.	N	.	.	A	2	2,0	R	2	1,1	INTERGENIC
chr1A	417092	G	T	T	5	0,5	N	.	.	T	1	0,1	T	3	0,3	INTERGENIC
chr1A	417663	A	G	N	.	.	G	8	0,8	G	11	0,11	G	10	0,10	INTERGENIC
chr1A	1160770	A	G	A	4	4,0	R	8	6,2	A	7	7,0	A	11	11,0	INTRON
chr1A	1164319	G	A	G	3	3,0	R	11	8,3	G	5	5,0	G	13	13,0	SYNONYMOUS_CODING	atC/atT	TraesCS1A02G002000
chr1A	1164355	C	G	C	5	5,0	S	8	5,3	C	4	4,0	C	11	11,0	SYNONYMOUS_CODING	ggG/ggC	TraesCS1A02G002000
chr1A	1164970	G	A	G	7	7,0	G	13	13,0	R	10	8,2	G	13	13,0	SYNONYMOUS_CODING	taC/taT	TraesCS1A02G002000
chr1A	1165771	C	G	C	3	3,0	S	5	3,2	S	13	11,2	C	13	13,0	SYNONYMOUS_CODING	ctG/ctC	TraesCS1A02G002000
chr1A	1165784	C	A	C	3	3,0	M	5	3,2	C	15	15,0	C	11	11,0	NON_SYNONYMOUS_CODING	aGg/aTg	TraesCS1A02G002000
chr1A	1173146	G	A	G	1	1,0	R	10	7,3	G	9	9,0	G	20	20,0	SYNONYMOUS_CODING	gaG/gaA	TraesCS1A02G002100
chr1A	1174226	T	C	T	4	4,0	Y	14	10,4	Y	22	19,3	T	17	17,0	SYNONYMOUS_CODING	cgT/cgC	TraesCS1A02G002100
chr1A	1174253	T	C	T	9	9,0	T	12	12,0	Y	18	14,4	T	14	14,0	SYNONYMOUS_CODING	ggT/ggC	TraesCS1A02G002100
chr1A	1201755	T	C	T	1	1,0	N	.	.	T	14	14,0	Y	11	9,2	UNKNOWN
chr1A	1207439	A	G	A	5	5,0	R	19	16,3	A	22	22,0	A	48	47,1	DOWNSTREAM
chr1A	1340070	G	A	G	1	1,0	G	4	4,0	G	10	10,0	R	10	8,2	INTRON
chr1A	1340566	G	A	N	.	.	G	2	2,0	G	3	3,0	R	8	2,6	INTRON
chr1A	1344337	T	C	N	.	.	N	.	.	T	1	1,0	Y	3	2,1	INTRON
chr1A	2155644	G	T	N	.	.	N	.	.	T	2	0,2	T	5	0,5	INTERGENIC
chr1A	2156509	C	T	N	.	.	N	.	.	T	12	0,12	T	19	0,19	INTERGENIC
chr1A	2156582	T	C	N	.	.	N	.	.	C	4	0,4	C	12	0,12	INTERGENIC
chr1A	2975443	C	T	N	.	.	C	12	12,0	Y	16	12,4	C	19	19,0	NON_SYNONYMOUS_CODING	tCt/tTt	TraesCS1A02G005000
chr1A	2975880	A	G	N	.	.	G	14	0,14	G	24	0,24	G	25	0,25	NON_SYNONYMOUS_CODING	Aat/Gat	TraesCS1A02G005000
chr1A	2975992	T	C	N	.	.	C	14	0,14	C	12	0,12	C	26	0,26	NON_SYNONYMOUS_CODING	gTg/gCg	TraesCS1A02G005000
chr1A	2976020	C	T	N	.	.	C	20	20,0	Y	8	6,2	C	24	24,0	SYNONYMOUS_CODING	atC/atT	TraesCS1A02G005000
chr1A	2976394	T	C	N	.	.	C	28	0,28	C	16	0,16	C	29	0,29	NON_SYNONYMOUS_CODING	gTc/gCc	TraesCS1A02G005000
chr1A	2976659	C	T	N	.	.	T	22	0,22	T	17	0,17	T	13	0,13	SYNONYMOUS_CODING	cgC/cgT	TraesCS1A02G005000
chr1A	2976765	T	C	N	.	.	C	22	0,22	C	20	0,20	C	24	0,24	STOP_LOST	Tag/Cag	TraesCS1A02G005000
chr1A	2976806	G	A	N	.	.	A	23	0,23	A	21	0,21	A	28	0,28	DOWNSTREAM
chr1A	2977710	C	T	N	.	.	T	7	0,7	T	3	0,3	T	1	0,1	DOWNSTREAM
chr1A	2979870	G	C	N	.	.	G	4	4,0	G	3	3,0	S	11	9,2	SPLICE_SITE_REGION
chr1A	2979900	T	C	T	2	2,0	T	10	10,0	Y	8	7,1	Y	15	11,4	SYNONYMOUS_CODING	ccA/ccG	TraesCS1A02G005100
chr1A	2979966	C	T	C	2	2,0	C	11	11,0	Y	7	6,1	Y	12	10,2	SYNONYMOUS_CODING	gaG/gaA	TraesCS1A02G005100
chr1A	2984204	A	C	N	.	.	C	1	0,1	M	5	3,2	C	8	0,8	NON_SYNONYMOUS_CODING	Ata/Cta	TraesCS1A02G005200
chr1A	2984366	T	G	N	.	.	G	1	0,1	G	5	0,5	K	12	3,9	NON_SYNONYMOUS_CODING	Tca/Gca	TraesCS1A02G005200
chr1A	2984467	T	C	N	.	.	T	3	3,0	Y	7	4,3	T	15	15,0	SYNONYMOUS_CODING	ccT/ccC	TraesCS1A02G005200
chr1A	2984738	A	G	N	.	.	R	4	1,3	A	13	12,1	R	8	5,3	NON_SYNONYMOUS_CODING	Aac/Gac	TraesCS1A02G005200
chr1A	2984869	G	C	N	.	.	N	.	.	S	7	5,2	S	2	1,1	NON_SYNONYMOUS_CODING	caG/caC	TraesCS1A02G005200
chr1A	2985195	G	A	N	.	.	A	2	0,2	A	4	0,4	A	3	0,3	NON_SYNONYMOUS_CODING	gGt/gAt	TraesCS1A02G005200
chr1A	3256047	T	C	T	9	9,0	C	16	0,16	Y	19	10,9	Y	21	4,17	INTRON
chr1A	3256651	T	C	Y	21	18,3	Y	6	5,1	T	24	24,0	T	24	24,0	SPLICE_SITE_REGION
chr1A	3260555	C	G	N	.	.	N	.	.	N	.	.	S	6	4,2	INTRON
chr1A	3381433	G	C	S	2	0,2	G	8	8,0	G	29	29,0	G	30	30,0	NON_SYNONYMOUS_CODING	Gtt/Ctt	TraesCS1A02G005700
chr1A	3381725	G	A	R	2	0,2	G	10	10,0	G	28	28,0	G	20	20,0	NON_SYNONYMOUS_CODING	Gtg/Atg	TraesCS1A02G005700
chr1A	3382845	A	G	A	3	3,0	G	20	0,20	G	16	0,16	R	21	7,14	NON_SYNONYMOUS_CODING	gAc/gGc	TraesCS1A02G005700
chr1A	3383082	G	C	G	7	7,0	C	7	0,7	S	11	3,8	S	14	7,7	NON_SYNONYMOUS_CODING	gGt/gCt	TraesCS1A02G005700
chr1A	3383127	T	C	T	7	7,0	C	7	0,7	Y	10	3,7	Y	14	7,7	NON_SYNONYMOUS_CODING	gTt/gCt	TraesCS1A02G005700
chr1A	3392090	G	A	N	.	.	N	.	.	A	4	0,4	A	8	0,8	UPSTREAM
chr1A	3392142	G	C	N	.	.	N	.	.	C	2	0,2	C	6	0,6	UPSTREAM
chr1A	3392323	T	C	Y	1	1,0	C	8	0,8	C	4	0,4	Y	6	2,4	UPSTREAM
chr1A	3454094	G	T	N	.	.	G	3	3,0	K	7	5,2	G	5	5,0	NON_SYNONYMOUS_CODING	Cta/Ata	TraesCS1A02G006000
chr1A	3456763	T	C	N	.	.	C	1	0,1	C	2	0,2	C	2	0,2	UPSTREAM
chr1A	3488842	G	A	N	.	.	N	.	.	G	1	1,0	R	4	2,2	SYNONYMOUS_CODING	ccC/ccT	TraesCS1A02G006200
chr1A	3488859	C	T	N	.	.	N	.	.	C	1	1,0	Y	4	2,2	NON_SYNONYMOUS_CODING	Gca/Aca	TraesCS1A02G006200
chr1A	3528557	C	A	M	8	6,2	C	8	8,0	C	16	16,0	C	13	13,0	DOWNSTREAM
chr1A	3528739	C	G	C	5	5,0	G	4	0,4	G	8	0,8	G	10	0,10	DOWNSTREAM
chr1A	3528845	G	T	N	.	.	T	9	0,9	T	7	0,7	T	3	0,3	DOWNSTREAM
chr1A	3528925	C	T	N	.	.	T	4	0,4	T	7	0,7	T	3	0,3	DOWNSTREAM
chr1A	3653727	A	G	A	2	2,0	R	14	10,4	A	4	4,0	R	11	9,2	UTR_3_PRIME
chr1A	3653798	A	G	A	1	1,0	R	18	11,7	A	4	4,0	R	15	11,4	SYNONYMOUS_CODING	tcT/tcC	TraesCS1A02G006800
chr1A	3654151	A	G	N	.	.	A	4	4,0	A	2	2,0	R	10	7,3	INTRON
chr1A	3654595	G	A	G	1	1,0	R	4	3,1	G	5	4,1	G	24	24,0	SYNONYMOUS_CODING	gaC/gaT	TraesCS1A02G006800
chr1A	3654766	A	T	W	1	1,0	T	6	0,6	W	9	4,5	W	18	5,13	SYNONYMOUS_CODING	gtT/gtA	TraesCS1A02G006800
chr1A	3654901	A	C	A	2	2,0	A	3	3,0	M	13	9,4	A	10	10,0	SYNONYMOUS_CODING	ctT/ctG	TraesCS1A02G006800
chr1A	3656723	C	T	C	4	4,0	T	5	0,5	Y	18	7,11	Y	23	14,9	NON_SYNONYMOUS_CODING	cGa/cAa	TraesCS1A02G006800
chr1A	4047733	G	T	G	4	4,0	G	5	5,0	G	2	2,0	K	7	5,2	INTRON
chr1A	4498108	T	G	N	.	.	N	.	.	T	1	1,0	K	9	7,2	NON_SYNONYMOUS_CODING	Ttc/Gtc	TraesCS1A02G008100
chr1A	4498671	C	T	N	.	.	Y	1	0,1	C	1	1,0	Y	3	2,1	SYNONYMOUS_CODING	ctC/ctT	TraesCS1A02G008100
chr1A	4498749	A	G	N	.	.	G	1	0,1	R	5	2,3	R	4	2,2	SYNONYMOUS_CODING	agA/agG	TraesCS1A02G008100
chr1A	4498972	G	A	N	.	.	N	.	.	R	6	1,5	R	6	5,1	NON_SYNONYMOUS_CODING	Gtt/Att	TraesCS1A02G008100
chr1A	4500721	G	T	N	.	.	G	1	1,0	G	1	1,0	K	11	8,3	NON_SYNONYMOUS_CODING	Gta/Tta	TraesCS1A02G008100
chr1A	4811659	T	A	T	2	2,0	N	.	.	W	7	5,2	T	5	5,0	NON_SYNONYMOUS_CODING	cTc/cAc	TraesCS1A02G008500
chr1A	4811949	A	C	A	1	1,0	A	1	1,0	M	9	6,3	A	5	5,0	NON_SYNONYMOUS_CODING	Agc/Cgc	TraesCS1A02G008500
chr1A	4811993	C	G	C	1	1,0	C	2	2,0	S	11	5,6	S	12	6,6	SYNONYMOUS_CODING	gcC/gcG	TraesCS1A02G008500
chr1A	4812083	A	G	N	.	.	A	3	3,0	R	9	4,5	R	10	4,6	NON_SYNONYMOUS_CODING	atA/atG	TraesCS1A02G008500
chr1A	4812186	G	A	N	.	.	R	14	7,7	A	14	1,13	R	11	5,6	NON_SYNONYMOUS_CODING	Gcc/Acc	TraesCS1A02G008500
chr1A	4812693	C	T	N	.	.	C	7	7,0	C	1	1,0	Y	5	2,3	SYNONYMOUS_CODING	Ctg/Ttg	TraesCS1A02G008500
chr1A	5497670	T	A	A	1	0,1	N	.	.	A	2	0,2	A	10	0,10	INTRON
chr1A	5503792	T	C	N	.	.	T	10	10,0	T	6	6,0	Y	12	9,3	SYNONYMOUS_CODING	tcA/tcG	TraesCS1A02G009300
chr1A	5506623	A	G	N	.	.	A	10	10,0	A	12	12,0	R	13	9,4	INTRON
chr1A	5649239	T	C	N	.	.	N	.	.	Y	7	5,2	T	34	34,0	NON_SYNONYMOUS_CODING	Aaa/Gaa	TraesCS1A02G009400
chr1A	5867612	C	A	N	.	.	N	.	.	C	1	1,0	M	10	8,2	UPSTREAM
chr1A	6052797	G	C	N	.	.	N	.	.	N	.	.	C	7	0,7	INTERGENIC
chr1A	6157694	C	T	N	.	.	N	.	.	N	.	.	Y	15	13,2	INTRON
chr1A	6158320	T	C	N	.	.	N	.	.	Y	3	2,1	Y	16	13,3	NON_SYNONYMOUS_CODING	Tcc/Ccc	TraesCS1A02G009900
chr1A	6322274	G	C	S	1	0,1	N	.	.	G	4	4,0	G	58	58,0	NON_SYNONYMOUS_CODING	Gtg/Ctg	TraesCS1A02G010200
chr1A	6323383	T	C	C	2	0,2	N	.	.	T	20	20,0	T	66	65,1	SYNONYMOUS_CODING	caT/caC	TraesCS1A02G010200
chr1A	6324232	C	T	T	4	0,4	N	.	.	C	5	5,0	C	14	14,0	SYNONYMOUS_CODING	taC/taT	TraesCS1A02G010200
chr1A	6337729	C	A	N	.	.	C	1	1,0	M	5	2,3	C	7	7,0	SYNONYMOUS_CODING	gtG/gtT	TraesCS1A02G010400
chr1A	6337823	A	G	N	.	.	N	.	.	R	6	4,2	A	13	13,0	NON_SYNONYMOUS_CODING	gTc/gCc	TraesCS1A02G010400
chr1A	6340296	C	A	N	.	.	N	.	.	M	1	0,1	C	8	8,0	NON_SYNONYMOUS_CODING	Gct/Tct	TraesCS1A02G010400
chr1A	6340363	G	C	N	.	.	N	.	.	S	1	0,1	G	8	8,0	SYNONYMOUS_CODING	ctC/ctG	TraesCS1A02G010400
chr1A	6340692	T	C	N	.	.	N	.	.	C	2	0,2	T	10	10,0	NON_SYNONYMOUS_CODING	Act/Gct	TraesCS1A02G010400
chr1A	6343111	G	T	N	.	.	N	.	.	N	.	.	K	4	2,2	UTR_5_PRIME
chr1A	6344146	C	T	N	.	.	N	.	.	N	.	.	Y	6	4,2	UTR_5_PRIME
chr1A	6570912	T	C	T	12	12,0	T	2	2,0	Y	9	6,3	T	15	15,0	NON_SYNONYMOUS_CODING	cAg/cGg	TraesCS1A02G011200
chr1A	6571537	C	T	Y	7	5,2	N	.	.	C	5	5,0	C	9	9,0	SYNONYMOUS_CODING	gtG/gtA	TraesCS1A02G011200
chr1A	6573548	A	G	A	5	5,0	G	4	0,4	A	4	4,0	A	18	18,0	SYNONYMOUS_CODING	Ttg/Ctg	TraesCS1A02G011200
chr1A	6575217	G	A	G	7	7,0	A	4	0,4	G	4	4,0	G	16	16,0	SYNONYMOUS_CODING	aaC/aaT	TraesCS1A02G011200
chr1A	6633533	A	T	A	2	2,0	N	.	.	A	7	7,0	W	20	17,3	UNKNOWN
chr1A	6635729	C	T	C	4	4,0	N	.	.	C	2	2,0	Y	3	1,2	UNKNOWN
chr1A	6638840	A	G	R	4	2,2	N	.	.	A	3	3,0	A	9	9,0	UNKNOWN
chr1A	6638917	A	G	R	2	0,2	N	.	.	A	5	5,0	A	12	12,0	UNKNOWN
chr1A	6641433	G	A	N	.	.	N	.	.	A	7	0,7	R	9	7,2	UNKNOWN
chr1A	6641493	G	A	N	.	.	N	.	.	A	7	0,7	R	9	7,2	UNKNOWN
chr1A	7075080	G	A	A	5	0,5	A	9	0,9	A	15	0,15	A	17	0,17	INTERGENIC
chr1A	7075141	G	A	A	5	0,5	A	7	0,7	A	14	0,14	A	13	0,13	INTERGENIC
chr1A	7075537	G	A	A	1	0,1	A	2	0,2	A	2	0,2	A	2	0,2	INTERGENIC
chr1A	7075792	C	A	A	1	0,1	A	10	0,10	A	8	0,8	A	24	0,24	INTERGENIC
chr1A	7076641	G	T	T	2	0,2	T	4	0,4	T	3	0,3	T	10	0,10	INTERGENIC
chr1A	7274964	T	C	T	3	3,0	N	.	.	Y	10	1,9	Y	8	3,5	SYNONYMOUS_CODING	gaT/gaC	TraesCS1A02G012800
chr1A	7275003	A	G	A	2	2,0	N	.	.	R	7	1,6	R	8	3,5	SYNONYMOUS_CODING	tcA/tcG	TraesCS1A02G012800
chr1A	7294167	A	C	C	2	0,2	C	1	0,1	C	2	0,2	C	5	0,5	NON_SYNONYMOUS_CODING	Aat/Cat	TraesCS1A02G013000
chr1A	7661572	A	G	N	.	.	A	6	6,0	R	7	5,2	A	10	10,0	INTRON
chr1A	7665372	G	A	N	.	.	G	7	7,0	G	8	8,0	R	10	8,2	SYNONYMOUS_CODING	ttC/ttT	TraesCS1A02G013800
chr1A	7690750	A	G	R	1	1,0	G	2	0,2	R	9	2,7	R	8	2,6	UNKNOWN
chr1A	7693002	A	C	M	3	1,2	A	14	14,0	A	20	20,0	A	41	41,0	DOWNSTREAM
chr1A	8237059	C	T	Y	7	5,2	C	3	3,0	C	6	6,0	C	7	7,0	DOWNSTREAM
chr1A	8238934	A	G	A	7	7,0	A	3	3,0	R	7	5,2	A	14	14,0	INTRON
chr1A	8239713	G	A	R	9	7,2	G	5	5,0	G	9	9,0	G	15	15,0	UTR_3_PRIME
chr1A	8239745	A	T	W	19	16,3	A	14	14,0	A	17	17,0	A	27	27,0	UTR_3_PRIME
chr1A	8266270	C	A	C	8	8,0	M	9	5,4	C	15	15,0	C	16	16,0	UTR_5_PRIME
chr1A	8296948	G	A	G	1	1,0	N	.	.	A	5	0,5	R	3	2,1	SYNONYMOUS_CODING	ctG/ctA	TraesCS1A02G015600
chr1A	8297011	A	G	A	1	1,0	N	.	.	R	5	2,3	R	3	2,1	SYNONYMOUS_CODING	ggA/ggG	TraesCS1A02G015600
chr1A	8337993	C	T	N	.	.	T	2	0,2	T	1	0,1	T	3	0,3	DOWNSTREAM
chr1A	8342060	T	A	W	1	1,0	A	2	0,2	A	13	0,13	W	51	19,32	NON_SYNONYMOUS_CODING	tTc/tAc	TraesCS1A02G016100
chr1A	8343763	C	T	C	8	8,0	T	5	0,5	T	18	1,17	Y	36	23,13	NON_SYNONYMOUS_CODING	Cgt/Tgt	TraesCS1A02G016100
chr1A	8343926	G	T	G	8	8,0	G	4	4,0	K	9	7,2	G	36	36,0	NON_SYNONYMOUS_CODING	aGc/aTc	TraesCS1A02G016100
chr1A	8344609	G	A	G	3	3,0	A	3	0,3	G	2	2,0	R	20	11,9	UTR_3_PRIME
chr1A	8630859	G	T	G	4	4,0	K	1	0,1	N	.	.	G	8	8,0	NON_SYNONYMOUS_CODING	Cta/Ata	TraesCS1A02G016200
chr1A	8630950	G	A	N	.	.	A	2	0,2	N	.	.	G	10	10,0	SYNONYMOUS_CODING	ctC/ctT	TraesCS1A02G016200
chr1A	8631548	C	T	Y	1	1,0	T	3	0,3	T	1	0,1	Y	5	4,1	NON_SYNONYMOUS_CODING	cGt/cAt	TraesCS1A02G016200
chr1A	8632379	A	G	N	.	.	N	.	.	G	6	0,6	G	2	0,2	NON_SYNONYMOUS_CODING	gTc/gCc	TraesCS1A02G016200
chr1A	8633056	G	A	N	.	.	N	.	.	A	1	0,1	R	10	8,2	SYNONYMOUS_CODING	gcC/gcT	TraesCS1A02G016200
chr1A	9105099	A	G	A	3	3,0	G	14	0,14	G	20	1,19	R	26	16,10	UTR_3_PRIME
chr1A	9106751	T	A	N	.	.	A	3	0,3	A	5	0,5	A	1	0,1	INTRON
chr1A	9120958	A	G	A	3	3,0	G	6	0,6	R	14	3,11	R	13	10,3	SYNONYMOUS_CODING	agA/agG	TraesCS1A02G017000
chr1A	9122998	C	A	M	1	1,0	A	5	0,5	A	1	0,1	M	4	3,1	UTR_3_PRIME
chr1A	9361667	C	A	N	.	.	N	.	.	C	1	1,0	M	16	13,3	INTRON
chr1A	9549591	T	C	N	.	.	N	.	.	T	5	4,1	Y	4	3,1	SYNONYMOUS_CODING	agA/agG	TraesCS1A02G018500
chr1A	9549600	A	G	N	.	.	N	.	.	A	3	2,1	R	4	3,1	SYNONYMOUS_CODING	ggT/ggC	TraesCS1A02G018500
chr1A	9550020	C	A	N	.	.	A	2	0,2	N	.	.	C	12	12,0	SYNONYMOUS_CODING	gtG/gtT	TraesCS1A02G018500
chr1A	9550056	A	G	N	.	.	G	2	0,2	N	.	.	A	11	11,0	SYNONYMOUS_CODING	gtT/gtC	TraesCS1A02G018500
chr1A	9551513	C	T	C	2	2,0	N	.	.	Y	3	2,1	C	5	5,0	NON_SYNONYMOUS_CODING	cGc/cAc	TraesCS1A02G018500
chr1A	9551552	T	G	T	2	2,0	G	6	0,6	N	.	.	K	9	5,4	NON_SYNONYMOUS_CODING	gAa/gCa	TraesCS1A02G018500
chr1A	9551719	G	A	G	2	2,0	N	.	.	G	1	1,0	R	8	4,4	SYNONYMOUS_CODING	tcC/tcT	TraesCS1A02G018500
chr1A	9553995	T	G	T	1	1,0	N	.	.	K	8	3,5	T	41	40,1	UPSTREAM
chr1A	9573228	T	C	N	.	.	N	.	.	C	1	0,1	Y	12	9,3	SYNONYMOUS_CODING	aaA/aaG	TraesCS1A02G018800
chr1A	9573255	A	G	N	.	.	N	.	.	G	1	0,1	R	7	4,3	SYNONYMOUS_CODING	tcT/tcC	TraesCS1A02G018800
chr1A	9573498	C	G	C	1	1,0	C	1	1,0	S	5	3,2	C	16	16,0	NON_SYNONYMOUS_CODING	tgG/tgC	TraesCS1A02G018800
chr1A	9574296	G	A	G	2	2,0	A	2	0,2	A	2	0,2	G	8	8,0	SYNONYMOUS_CODING	tgC/tgT	TraesCS1A02G018800
chr1A	9574365	G	T	G	3	3,0	G	3	3,0	G	3	3,0	K	8	6,2	NON_SYNONYMOUS_CODING	ttC/ttA	TraesCS1A02G018800
chr1A	9579826	A	G	A	26	26,0	R	1	0,1	R	14	12,2	A	47	46,1	SYNONYMOUS_CODING	gaT/gaC	TraesCS1A02G018900
chr1A	9582683	G	A	G	24	24,0	N	.	.	R	9	7,2	G	44	43,1	SYNONYMOUS_CODING	gcC/gcT	TraesCS1A02G018900
chr1A	9583449	C	T	C	1	1,0	T	3	0,3	Y	2	1,1	Y	5	3,2	SYNONYMOUS_CODING	ggG/ggA	TraesCS1A02G018900
chr1A	9587821	A	G	A	4	4,0	N	.	.	R	2	1,1	R	18	16,2	INTRON
chr1A	9587850	A	G	A	6	6,0	N	.	.	R	3	2,1	R	19	17,2	INTRON
chr1A	9642477	G	T	G	20	20,0	K	2	0,2	K	7	6,1	G	31	30,1	NON_SYNONYMOUS_CODING	tCt/tAt	TraesCS1A02G019200
chr1A	9642852	C	T	C	24	24,0	N	.	.	Y	6	1,5	C	41	38,3	NON_SYNONYMOUS_CODING	aGg/aAg	TraesCS1A02G019200
chr1A	9643004	A	G	A	9	9,0	G	5	0,5	G	11	0,11	R	43	34,9	SYNONYMOUS_CODING	gaT/gaC	TraesCS1A02G019200
chr1A	10049071	T	A	T	9	9,0	W	1	0,1	T	2	2,0	W	22	19,3	UTR_3_PRIME
chr1A	10049129	C	G	C	7	7,0	S	1	0,1	C	2	2,0	C	17	17,0	UTR_3_PRIME
chr1A	10057690	A	G	N	.	.	G	1	0,1	G	5	0,5	R	3	1,2	UTR_5_PRIME
chr1A	10065911	G	A	G	1	1,0	N	.	.	R	4	2,2	G	17	17,0	UPSTREAM
chr1A	10066268	G	A	G	8	8,0	R	2	0,2	G	5	5,0	G	11	11,0	UTR_5_PRIME
chr1A	10066472	G	A	G	8	8,0	N	.	.	R	9	2,7	R	16	14,2	UTR_5_PRIME
chr1A	10066587	T	G	T	2	2,0	N	.	.	K	1	0,1	T	10	10,0	INTRON
chr1A	10066800	T	C	T	9	9,0	N	.	.	Y	4	2,2	T	11	11,0	INTRON
chr1A	10066930	A	G	A	8	8,0	A	1	1,0	A	3	3,0	R	7	5,2	INTRON
chr1A	10068016	T	C	T	1	1,0	N	.	.	T	3	3,0	Y	6	3,3	INTRON
chr1A	10069156	A	G	N	.	.	G	4	0,4	R	7	6,1	R	4	3,1	UTR_3_PRIME
chr1A	10071112	A	T	A	12	12,0	T	5	0,5	W	18	5,13	W	24	16,8	NON_SYNONYMOUS_CODING	Tgt/Agt	TraesCS1A02G020600
chr1A	10071247	A	G	R	2	2,0	G	1	0,1	G	1	0,1	R	5	1,4	INTRON
chr1A	10083065	T	A	T	5	5,0	T	3	3,0	T	2	2,0	W	4	2,2	SYNONYMOUS_CODING	ggT/ggA	TraesCS1A02G020700
chr1A	10135665	C	T	C	3	3,0	Y	3	1,2	C	52	52,0	C	16	16,0	NON_SYNONYMOUS_CODING	Cct/Tct	TraesCS1A02G021000
chr1A	10166418	T	C	T	11	11,0	T	21	19,2	T	14	13,1	Y	23	19,4	INTERGENIC
chr1A	10211115	C	A	N	.	.	A	1	0,1	A	4	0,4	A	5	0,5	INTRON
chr1A	10969833	A	C	A	7	7,0	A	4	4,0	M	7	4,3	A	17	17,0	UTR_3_PRIME
chr1A	11564558	T	C	N	.	.	T	1	1,0	N	.	.	Y	8	4,4	NON_SYNONYMOUS_CODING	gTc/gCc	TraesCS1A02G023400
chr1A	11564619	G	A	N	.	.	A	2	0,2	A	1	0,1	A	7	0,7	SYNONYMOUS_CODING	gcG/gcA	TraesCS1A02G023400
chr1A	11564866	C	T	T	1	0,1	T	8	0,8	T	9	0,9	T	21	0,21	SYNONYMOUS_CODING	gaC/gaT	TraesCS1A02G023400
chr1A	11567113	C	T	T	2	0,2	T	3	0,3	T	15	0,15	T	9	0,9	NON_SYNONYMOUS_CODING	Cca/Tca	TraesCS1A02G023400
chr1A	11567160	C	T	T	3	0,3	T	5	0,5	T	15	0,15	T	13	0,13	SYNONYMOUS_CODING	acC/acT	TraesCS1A02G023400
chr1A	11567283	A	G	G	1	0,1	G	6	0,6	G	22	0,22	G	19	0,19	SYNONYMOUS_CODING	gaA/gaG	TraesCS1A02G023400
chr1A	11567509	A	T	N	.	.	T	16	0,16	T	26	0,26	T	18	0,18	NON_SYNONYMOUS_CODING	Aat/Tat	TraesCS1A02G023400
chr1A	11567833	A	T	W	2	2,0	T	9	0,9	T	8	0,8	W	9	3,6	NON_SYNONYMOUS_CODING	gAg/gTg	TraesCS1A02G023400
chr1A	11568157	C	G	C	4	4,0	S	9	6,3	C	25	25,0	C	25	25,0	NON_SYNONYMOUS_CODING	Ctt/Gtt	TraesCS1A02G023400
chr1A	11568728	C	T	T	6	0,6	T	4	0,4	T	15	0,15	T	18	0,18	SYNONYMOUS_CODING	caC/caT	TraesCS1A02G023400
chr1A	11569750	A	G	G	6	0,6	G	6	0,6	G	25	1,24	G	20	2,18	SYNONYMOUS_CODING	aaA/aaG	TraesCS1A02G023400
chr1A	11570718	A	T	W	6	4,2	A	14	14,0	A	19	19,0	A	31	31,0	NON_SYNONYMOUS_CODING	cAt/cTt	TraesCS1A02G023400
chr1A	11571774	T	C	C	10	0,10	C	26	0,26	C	15	0,15	C	15	0,15	SYNONYMOUS_CODING	ctT/ctC	TraesCS1A02G023400
chr1A	11644531	T	C	C	3	0,3	N	.	.	T	7	7,0	T	9	9,0	INTRON
chr1A	11661861	T	C	N	.	.	Y	11	9,2	T	17	17,0	T	6	6,0	UTR_5_PRIME
chr1A	11934916	A	G	A	34	34,0	R	3	1,2	A	5	5,0	A	31	31,0	UNKNOWN
chr1A	11942764	C	T	N	.	.	C	2	2,0	N	.	.	Y	3	1,2	UNKNOWN
chr1A	12090779	T	A	N	.	.	T	3	3,0	T	5	5,0	W	10	6,4	INTRON
chr1A	12091793	C	T	N	.	.	C	5	5,0	C	4	4,0	Y	11	8,3	INTRON
chr1A	12092032	C	T	Y	1	0,1	C	21	21,0	Y	19	16,3	Y	11	6,5	INTRON
chr1A	12092096	G	A	R	1	0,1	G	22	22,0	R	27	21,6	R	11	7,4	INTRON
chr1A	12092303	C	T	N	.	.	C	7	7,0	C	15	15,0	Y	12	9,3	INTRON
chr1A	12092369	G	T	N	.	.	G	1	1,0	G	8	8,0	K	12	6,6	INTRON
chr1A	12098848	T	C	C	2	0,2	T	16	16,0	Y	27	22,5	Y	33	27,6	UTR_3_PRIME
chr1A	12102659	G	C	C	1	0,1	N	.	.	N	.	.	C	4	0,4	INTRON
chr1A	12103106	C	A	A	2	0,2	C	5	5,0	M	16	10,6	M	19	7,12	NON_SYNONYMOUS_CODING	Gct/Tct	TraesCS1A02G024700
chr1A	12103279	T	G	N	.	.	T	11	11,0	T	22	22,0	K	18	12,6	NON_SYNONYMOUS_CODING	gAc/gCc	TraesCS1A02G024700
chr1A	12103570	A	G	G	4	0,4	A	22	22,0	R	23	18,5	R	37	16,21	NON_SYNONYMOUS_CODING	cTc/cCc	TraesCS1A02G024700
chr1A	12103635	G	A	A	2	0,2	G	11	11,0	R	14	9,5	R	21	15,6	SYNONYMOUS_CODING	gaC/gaT	TraesCS1A02G024700
chr1A	12142394	G	C	C	3	0,3	C	4	0,4	N	.	.	C	1	0,1	UTR_3_PRIME
chr1A	12142487	A	G	A	8	8,0	R	10	8,2	A	6	6,0	A	11	11,0	UTR_3_PRIME
chr1A	12143090	G	A	A	17	0,17	G	32	32,0	G	11	11,0	R	22	9,13	SYNONYMOUS_CODING	gcC/gcT	TraesCS1A02G025100
chr1A	12143176	T	C	T	17	17,0	T	20	20,0	Y	13	10,3	T	32	32,0	NON_SYNONYMOUS_CODING	Aag/Gag	TraesCS1A02G025100
chr1A	12160996	G	C	N	.	.	N	.	.	C	3	0,3	C	6	0,6	INTRON
chr1A	12161888	G	C	S	1	0,1	G	15	15,0	G	43	41,2	S	9	6,3	UPSTREAM
chr1A	12161970	C	A	M	1	0,1	C	10	10,0	C	36	36,0	M	6	4,2	UPSTREAM
chr1A	12182739	T	G	G	2	0,2	G	5	0,5	G	3	0,3	G	4	0,4	DOWNSTREAM
chr1A	12182986	C	G	G	1	0,1	G	8	0,8	G	11	0,11	G	4	0,4	DOWNSTREAM
chr1A	12201934	A	G	N	.	.	G	13	0,13	G	6	0,6	G	5	0,5	INTERGENIC
chr1A	12207116	G	C	N	.	.	C	15	0,15	C	16	0,16	C	8	0,8	DOWNSTREAM
chr1A	12207557	C	T	N	.	.	T	7	0,7	N	.	.	T	3	0,3	DOWNSTREAM
chr1A	12210645	A	G	N	.	.	N	.	.	G	1	0,1	G	6	0,6	INTRON
chr1A	12210788	A	G	N	.	.	N	.	.	A	1	1,0	R	6	3,3	INTRON
chr1A	12212198	A	G	N	.	.	A	12	12,0	N	.	.	R	7	5,2	INTRON
chr1A	12212283	A	G	N	.	.	G	13	0,13	N	.	.	A	8	8,0	INTRON
chr1A	12212819	T	C	N	.	.	C	16	0,16	C	8	0,8	Y	14	2,12	INTRON
chr1A	12212854	C	T	N	.	.	T	14	0,14	T	14	0,14	Y	13	2,11	INTRON
chr1A	12212968	G	T	N	.	.	T	14	0,14	T	12	0,12	K	16	6,10	INTRON
chr1A	12213097	C	T	N	.	.	T	5	0,5	T	3	0,3	Y	3	1,2	INTRON
chr1A	12213144	T	A	N	.	.	N	.	.	A	2	0,2	W	4	2,2	INTRON
chr1A	12213414	G	A	N	.	.	A	17	0,17	A	3	0,3	R	15	3,12	INTRON
chr1A	12213420	C	T	N	.	.	T	18	0,18	T	3	0,3	Y	15	3,12	INTRON
chr1A	12213670	A	G	N	.	.	G	21	0,21	R	7	1,6	R	17	3,14	INTRON
chr1A	12213725	C	T	N	.	.	T	16	0,16	Y	12	1,11	Y	13	3,10	INTRON
chr1A	12213942	C	G	N	.	.	G	12	0,12	G	19	0,19	S	11	2,9	INTRON
chr1A	12214096	T	C	N	.	.	C	5	0,5	Y	6	2,4	C	7	0,7	INTRON
chr1A	12214144	C	A	N	.	.	M	1	0,1	M	1	1,0	M	2	1,1	INTRON
chr1A	12214351	G	A	N	.	.	A	25	0,25	A	11	0,11	R	26	6,20	INTRON
chr1A	12215040	C	T	N	.	.	T	4	0,4	Y	1	1,0	Y	6	1,5	INTRON
chr1A	12215116	T	C	N	.	.	N	.	.	Y	4	2,2	Y	2	1,1	INTRON
chr1A	12215629	A	T	N	.	.	T	9	0,9	T	3	0,3	W	12	7,5	INTRON
chr1A	12215727	A	G	N	.	.	G	9	0,9	G	8	0,8	R	20	7,13	INTRON
chr1A	12215849	A	G	N	.	.	G	19	0,19	R	21	2,19	R	32	8,24	INTRON
chr1A	12303948	A	G	A	1	1,0	G	4	0,4	R	4	1,3	A	29	28,1	SYNONYMOUS_CODING	Ttg/Ctg	TraesCS1A02G025600
chr1A	12303961	A	G	A	1	1,0	G	5	0,5	R	5	1,4	A	34	33,1	SYNONYMOUS_CODING	agT/agC	TraesCS1A02G025600
chr1A	12306084	T	C	T	2	2,0	Y	2	0,2	Y	11	8,3	T	53	53,0	NON_SYNONYMOUS_CODING	Att/Gtt	TraesCS1A02G025600
chr1A	12306127	A	G	A	3	3,0	G	3	0,3	R	9	7,2	A	59	59,0	SYNONYMOUS_CODING	gaT/gaC	TraesCS1A02G025600
chr1A	12306139	C	A	C	3	3,0	A	3	0,3	M	8	6,2	C	59	59,0	SYNONYMOUS_CODING	ctG/ctT	TraesCS1A02G025600
chr1A	12307171	G	A	N	.	.	N	.	.	N	.	.	A	7	0,7	INTRON
chr1A	12363809	C	G	C	7	7,0	G	8	0,8	S	7	1,6	S	9	3,6	UTR_5_PRIME
chr1A	12364337	G	C	N	.	.	C	1	0,1	C	4	0,4	S	4	1,3	INTRON
chr1A	12364954	C	T	C	2	2,0	T	7	0,7	Y	9	1,8	Y	11	3,8	INTRON
chr1A	12365767	C	T	C	3	3,0	T	3	0,3	T	1	0,1	Y	3	1,2	INTRON
chr1A	12366361	C	A	N	.	.	N	.	.	A	2	0,2	M	4	2,2	INTRON
chr1A	12366392	T	A	N	.	.	N	.	.	A	2	0,2	W	4	2,2	INTRON
chr1A	12366916	A	C	M	11	7,4	A	20	20,0	A	19	19,0	A	22	22,0	SYNONYMOUS_CODING	ccA/ccC	TraesCS1A02G025900
chr1A	12366937	T	C	Y	7	4,3	T	19	19,0	T	21	21,0	T	23	23,0	SYNONYMOUS_CODING	taT/taC	TraesCS1A02G025900
chr1A	12368006	C	T	Y	4	1,3	C	28	28,0	C	20	20,0	C	34	34,0	SYNONYMOUS_CODING	ttC/ttT	TraesCS1A02G025900
chr1A	12368033	T	C	Y	5	2,3	T	26	26,0	T	24	24,0	T	32	32,0	SYNONYMOUS_CODING	gcT/gcC	TraesCS1A02G025900
chr1A	12368522	T	A	T	8	8,0	A	21	0,21	A	26	2,24	W	35	14,21	SYNONYMOUS_CODING	atT/atA	TraesCS1A02G025900
chr1A	12369139	G	T	G	3	3,0	G	11	11,0	K	9	7,2	G	25	25,0	NON_SYNONYMOUS_CODING	cGt/cTt	TraesCS1A02G025900
chr1A	12369374	G	C	G	2	2,0	C	9	0,9	S	6	2,4	S	25	15,10	UTR_3_PRIME
chr1A	12369428	G	C	N	.	.	C	10	0,10	C	3	0,3	S	23	14,9	UTR_3_PRIME
chr1A	12410373	C	T	Y	2	2,0	T	2	0,2	T	1	0,1	Y	3	1,2	INTERGENIC
chr1A	12502870	C	A	N	.	.	A	10	0,10	A	22	1,21	M	21	11,10	UTR_5_PRIME
chr1A	12504689	A	G	R	1	1,0	G	32	0,32	R	19	3,16	R	4	1,3	NON_SYNONYMOUS_CODING	Acc/Gcc	TraesCS1A02G026200
chr1A	12504950	A	C	N	.	.	C	9	0,9	M	30	5,25	M	14	9,5	NON_SYNONYMOUS_CODING	Aac/Cac	TraesCS1A02G026200
chr1A	12504974	C	T	N	.	.	C	9	9,0	C	30	30,0	Y	14	12,2	NON_SYNONYMOUS_CODING	Cct/Tct	TraesCS1A02G026200
chr1A	12505124	T	C	N	.	.	N	.	.	N	.	.	Y	4	2,2	STOP_LOST	Tag/Cag	TraesCS1A02G026200
chr1A	12506132	A	G	A	2	2,0	G	11	0,11	G	6	0,6	R	18	7,11	UTR_3_PRIME
chr1A	12506554	G	A	R	1	1,0	A	8	0,8	A	3	0,3	A	7	0,7	UTR_3_PRIME
chr1A	12506713	A	G	R	1	1,0	G	11	0,11	G	3	0,3	R	12	3,9	UTR_3_PRIME
chr1A	12585370	G	C	G	8	8,0	C	8	0,8	S	4	1,3	S	20	13,7	UTR_3_PRIME
chr1A	12586732	A	T	A	15	15,0	T	4	0,4	A	4	4,0	W	43	31,12	UTR_3_PRIME
chr1A	12588095	T	C	T	22	22,0	C	3	0,3	T	6	6,0	T	47	47,0	NON_SYNONYMOUS_CODING	cAa/cGa	TraesCS1A02G026400
chr1A	12590172	C	T	C	2	2,0	T	3	0,3	Y	11	4,7	Y	25	22,3	NON_SYNONYMOUS_CODING	cGg/cAg	TraesCS1A02G026400
chr1A	12590225	T	C	T	2	2,0	C	2	0,2	Y	8	4,4	T	31	29,2	SYNONYMOUS_CODING	aaA/aaG	TraesCS1A02G026400
chr1A	12590590	G	T	G	2	2,0	T	3	0,3	K	7	2,5	K	35	27,8	SYNONYMOUS_CODING	Cga/Aga	TraesCS1A02G026400
chr1A	12591018	C	T	C	1	1,0	T	7	0,7	Y	22	5,17	Y	31	25,6	UTR_5_PRIME
chr1A	13081605	G	T	N	.	.	N	.	.	N	.	.	K	5	3,2	UTR_5_PRIME
chr1A	13415859	A	G	N	.	.	G	6	0,6	G	8	0,8	G	6	0,6	STOP_LOST	tAg/tGg	TraesCS1A02G028600
chr1A	13416023	C	A	N	.	.	M	29	24,5	M	23	17,6	C	27	27,0	UTR_3_PRIME
chr1A	13416250	G	T	N	.	.	T	5	0,5	T	5	0,5	T	15	0,15	UTR_3_PRIME
chr1A	13416510	C	T	N	.	.	T	5	0,5	T	1	0,1	T	4	0,4	UTR_3_PRIME
chr1A	13416587	C	G	N	.	.	G	20	0,20	G	7	0,7	G	20	0,20	UTR_3_PRIME
chr1A	13416740	T	C	N	.	.	C	22	0,22	C	11	0,11	C	25	0,25	UTR_3_PRIME
chr1A	13572158	T	C	T	2	2,0	N	.	.	C	1	0,1	Y	6	2,4	NON_SYNONYMOUS_CODING	Tgt/Cgt	TraesCS1A02G028900
chr1A	13572205	C	A	C	2	2,0	N	.	.	N	.	.	M	6	2,4	SYNONYMOUS_CODING	ctC/ctA	TraesCS1A02G028900
chr1A	13662955	T	A	T	3	3,0	N	.	.	T	7	7,0	W	15	11,4	UPSTREAM
chr1A	13665650	T	C	N	.	.	N	.	.	N	.	.	Y	11	9,2	NON_SYNONYMOUS_CODING	Tac/Cac	TraesCS1A02G029100
chr1A	13668063	T	C	N	.	.	C	3	0,3	C	5	0,5	Y	6	4,2	DOWNSTREAM
chr1A	13674119	G	C	G	3	3,0	C	6	0,6	S	16	7,9	S	9	6,3	NON_SYNONYMOUS_CODING	Ctg/Gtg	TraesCS1A02G029200
chr1A	13674310	A	T	A	3	3,0	A	2	2,0	W	10	8,2	A	17	17,0	NON_SYNONYMOUS_CODING	tTt/tAt	TraesCS1A02G029200
chr1A	13743643	G	A	R	2	1,1	A	4	2,2	A	7	5,2	R	10	7,3	INTERGENIC
chr1A	13744208	C	T	C	5	5,0	Y	11	7,4	Y	16	3,13	Y	14	3,11	INTERGENIC
chr1A	13744365	G	A	R	1	1,0	N	.	.	R	6	2,4	A	8	0,8	INTERGENIC
chr1A	13764052	T	C	Y	3	2,1	T	3	3,0	N	.	.	T	9	9,0	INTRON
chr1A	13765180	G	A	G	4	4,0	R	7	5,2	G	9	9,0	G	14	14,0	INTRON
chr1A	13802552	T	C	N	.	.	C	2	0,2	N	.	.	C	2	0,2	UPSTREAM
chr1A	13862340	T	C	T	12	12,0	C	6	0,6	Y	19	4,15	Y	35	20,15	NON_SYNONYMOUS_CODING	Agc/Ggc	TraesCS1A02G029800
chr1A	13862518	C	G	C	1	1,0	C	5	5,0	S	19	16,3	C	26	26,0	SYNONYMOUS_CODING	gcG/gcC	TraesCS1A02G029800
chr1A	14046202	A	G	A	11	11,0	R	16	13,3	A	24	23,1	A	31	31,0	NON_SYNONYMOUS_CODING	Aag/Gag	TraesCS1A02G030100
chr1A	14046265	G	A	G	5	5,0	G	8	8,0	G	4	4,0	R	12	5,7	NON_SYNONYMOUS_CODING	Ggg/Agg	TraesCS1A02G030100
chr1A	14046273	T	C	C	4	0,4	C	8	0,8	Y	6	2,4	Y	7	4,3	SYNONYMOUS_CODING	gaT/gaC	TraesCS1A02G030100
chr1A	14046393	C	G	C	2	2,0	C	7	7,0	C	10	10,0	S	21	15,6	NON_SYNONYMOUS_CODING	agC/agG	TraesCS1A02G030100
chr1A	14046420	C	T	T	2	0,2	T	5	0,5	Y	9	2,7	Y	19	16,3	SYNONYMOUS_CODING	ttC/ttT	TraesCS1A02G030100
chr1A	14081892	A	G	N	.	.	R	1	0,1	A	2	2,0	R	14	12,2	UPSTREAM
chr1A	14082388	G	A	A	2	0,2	A	2	0,2	R	1	1,0	R	5	4,1	UNKNOWN
chr1A	14082532	A	G	A	2	2,0	A	6	6,0	R	10	8,2	A	11	11,0	UNKNOWN
chr1A	14082767	T	C	N	.	.	Y	2	0,2	T	14	14,0	T	11	11,0	UNKNOWN
chr1A	14084270	T	C	N	.	.	C	3	0,3	T	3	3,0	Y	2	1,1	UNKNOWN
chr1A	14084329	G	A	A	1	0,1	A	1	0,1	G	3	3,0	R	2	1,1	UNKNOWN
chr1A	14084441	T	A	T	1	1,0	T	3	3,0	T	2	2,0	W	2	1,1	UNKNOWN
chr1A	14085329	A	G	G	3	0,3	G	1	0,1	R	7	3,4	R	16	10,6	UNKNOWN
chr1A	14085476	A	C	C	3	0,3	N	.	.	M	3	1,2	M	5	3,2	UNKNOWN
chr1A	14085552	C	T	N	.	.	N	.	.	Y	3	1,2	Y	6	3,3	UNKNOWN
chr1A	14139815	C	T	C	6	6,0	C	20	20,0	C	7	7,0	Y	35	29,6	NON_SYNONYMOUS_CODING	gCa/gTa	TraesCS1A02G030500
chr1A	14141705	C	T	T	4	0,4	T	5	0,5	Y	8	2,6	Y	26	4,22	NON_SYNONYMOUS_CODING	cCc/cTc	TraesCS1A02G030500
chr1A	14142872	T	A	A	15	0,15	A	21	0,21	W	15	3,12	W	7	2,5	SYNONYMOUS_CODING	atT/atA	TraesCS1A02G030500
chr1A	14143091	C	T	T	6	0,6	T	15	0,15	Y	11	2,9	T	18	0,18	SYNONYMOUS_CODING	ttC/ttT	TraesCS1A02G030500
chr1A	14144553	T	G	N	.	.	K	1	0,1	K	4	3,1	K	8	6,2	INTRON
chr1A	14144749	G	C	G	2	2,0	C	1	0,1	S	9	2,7	S	8	6,2	INTRON
chr1A	14145068	A	C	C	1	0,1	C	2	0,2	M	4	3,1	M	4	2,2	INTRON
chr1A	14145244	A	C	C	1	0,1	N	.	.	M	13	8,5	M	8	4,4	INTRON
chr1A	14145290	A	G	G	3	0,3	G	3	0,3	R	11	6,5	R	15	5,10	INTRON
chr1A	14145300	C	T	C	3	3,0	T	3	0,3	Y	12	6,6	Y	17	7,10	INTRON
chr1A	14145581	G	T	T	3	0,3	N	.	.	G	5	5,0	G	12	12,0	INTRON
chr1A	14161167	G	C	N	.	.	C	4	0,4	S	7	4,3	S	5	3,2	INTRON
chr1A	14161545	A	C	A	3	3,0	N	.	.	M	3	1,2	M	6	3,3	INTRON
chr1A	14161598	T	C	N	.	.	C	1	0,1	Y	2	1,1	Y	6	3,3	INTRON
chr1A	14161616	C	T	N	.	.	T	1	0,1	Y	2	1,1	Y	6	3,3	INTRON
chr1A	14161799	T	C	C	2	0,2	C	12	0,12	Y	8	1,7	Y	13	6,7	INTRON
chr1A	14162164	G	T	G	3	3,0	K	9	7,2	G	24	24,0	G	26	26,0	INTRON
chr1A	14197316	A	G	N	.	.	G	3	0,3	N	.	.	G	6	0,6	INTERGENIC
chr1A	14243867	A	C	N	.	.	N	.	.	N	.	.	M	6	4,2	INTERGENIC
chr1A	14244390	C	T	N	.	.	T	1	0,1	T	3	0,3	T	3	0,3	UNKNOWN
chr1A	14504473	A	C	C	2	0,2	C	12	0,12	C	15	0,15	C	17	0,17	UTR_5_PRIME
chr1A	14504959	G	C	C	2	0,2	C	6	0,6	C	7	0,7	C	15	0,15	INTRON
chr1A	14505168	C	G	G	3	0,3	G	4	0,4	G	5	0,5	G	12	0,12	INTRON
chr1A	14505214	T	C	C	3	0,3	T	4	4,0	T	7	7,0	T	12	12,0	INTRON
chr1A	14505694	A	G	N	.	.	G	2	0,2	G	2	0,2	G	5	0,5	INTRON
chr1A	14506618	A	G	N	.	.	G	6	0,6	G	8	0,8	G	8	0,8	INTRON
chr1A	14507223	G	C	C	6	0,6	C	8	0,8	C	12	0,12	C	25	0,25	SYNONYMOUS_CODING	gtG/gtC	TraesCS1A02G031200
chr1A	14507256	C	G	N	.	.	G	3	0,3	G	4	0,4	G	9	0,9	SYNONYMOUS_CODING	ctC/ctG	TraesCS1A02G031200
chr1A	14507478	T	C	N	.	.	C	2	0,2	C	1	0,1	C	2	0,2	SYNONYMOUS_CODING	gcT/gcC	TraesCS1A02G031200
chr1A	14507501	T	C	N	.	.	C	2	0,2	C	1	0,1	C	2	0,2	UTR_3_PRIME
chr1A	14525837	T	C	T	1	1,0	T	5	5,0	Y	12	10,2	T	7	7,0	DOWNSTREAM
chr1A	14987136	G	A	A	5	0,5	A	7	0,7	A	7	0,7	A	10	0,10	UPSTREAM
chr1A	14987674	C	T	T	3	0,3	T	11	0,11	T	15	0,15	T	17	0,17	UPSTREAM
chr1A	14987830	A	T	N	.	.	T	1	0,1	T	3	0,3	T	5	0,5	UPSTREAM
chr1A	15344871	G	A	R	27	21,6	G	6	6,0	G	6	6,0	G	13	13,0	SYNONYMOUS_CODING	gaC/gaT	TraesCS1A02G032900
chr1A	15375126	C	A	N	.	.	A	11	0,11	A	6	0,6	A	20	0,20	UNKNOWN
chr1A	15375184	A	G	N	.	.	G	4	0,4	G	6	0,6	G	29	0,29	UNKNOWN
chr1A	15375232	T	C	N	.	.	N	.	.	C	1	0,1	C	23	0,23	UNKNOWN
chr1A	15435407	G	C	N	.	.	N	.	.	G	3	3,0	S	10	8,2	INTRON
chr1A	15436634	C	T	T	9	0,9	T	4	0,4	T	6	0,6	T	5	0,5	SYNONYMOUS_CODING	taC/taT	TraesCS1A02G033000
chr1A	15437092	T	C	C	19	0,19	C	13	0,13	C	6	0,6	C	28	0,28	SYNONYMOUS_CODING	gcT/gcC	TraesCS1A02G033000
chr1A	15437216	T	A	A	36	0,36	N	.	.	A	5	0,5	A	8	0,8	UTR_3_PRIME
chr1A	15439457	G	A	N	.	.	N	.	.	A	5	0,5	A	7	0,7	INTRON
chr1A	15439572	A	T	T	1	0,1	T	3	0,3	T	5	0,5	T	14	0,14	INTRON
chr1A	15439751	T	A	W	2	2,0	A	7	0,7	A	6	0,6	A	10	0,10	INTRON
chr1A	15439967	G	T	G	3	3,0	T	1	0,1	T	5	0,5	T	8	0,8	INTRON
chr1A	15440250	G	A	R	2	2,0	A	4	0,4	A	10	0,10	A	11	0,11	INTRON
chr1A	15440365	G	C	N	.	.	C	9	0,9	C	5	0,5	C	5	0,5	INTRON
chr1A	15440463	G	C	N	.	.	C	6	0,6	C	6	0,6	C	13	0,13	INTRON
chr1A	15441365	G	A	R	2	2,0	A	9	0,9	A	19	0,19	A	36	0,36	UTR_5_PRIME
chr1A	15516483	G	T	G	1	1,0	G	3	3,0	K	7	5,2	G	13	13,0	UPSTREAM
chr1A	15518192	G	A	G	1	1,0	G	13	13,0	R	18	14,4	R	24	18,6	SYNONYMOUS_CODING	caG/caA	TraesCS1A02G033200
chr1A	16038912	C	A	A	3	0,3	C	18	18,0	M	8	7,1	C	13	13,0	NON_SYNONYMOUS_CODING	gCc/gAc	TraesCS1A02G033300
chr1A	16235868	G	T	T	1	0,1	N	.	.	T	3	0,3	T	2	0,2	INTERGENIC
chr1A	16391176	A	G	G	5	0,5	G	1	0,1	G	2	0,2	G	1	0,1	DOWNSTREAM
chr1A	16391279	G	T	T	5	0,5	T	3	0,3	T	6	0,6	T	8	0,8	DOWNSTREAM
chr1A	16391458	C	T	T	24	0,24	C	17	17,0	Y	11	7,4	Y	16	3,13	DOWNSTREAM
chr1A	16391465	C	T	C	26	26,0	T	17	0,17	Y	11	4,7	Y	15	12,3	DOWNSTREAM
chr1A	16391483	A	T	T	22	0,22	T	17	0,17	T	9	0,9	T	12	0,12	DOWNSTREAM
chr1A	16391556	C	T	C	18	18,0	C	16	16,0	Y	12	10,2	Y	9	5,4	DOWNSTREAM
chr1A	16391601	T	G	G	28	0,28	G	16	0,16	G	18	0,18	G	12	0,12	DOWNSTREAM
chr1A	16391830	C	T	T	25	0,25	T	9	0,9	Y	27	7,20	Y	8	4,4	DOWNSTREAM
chr1A	16391941	G	A	A	3	0,3	A	1	0,1	A	6	0,6	A	1	0,1	DOWNSTREAM
chr1A	16407399	T	G	G	3	1,2	G	3	0,3	K	10	5,5	K	32	16,16	NON_SYNONYMOUS_CODING	tTc/tGc	TraesCS1A02G033600
chr1A	16409666	T	C	N	.	.	N	.	.	C	6	0,6	C	3	0,3	SYNONYMOUS_CODING	atT/atC	TraesCS1A02G033600
chr1A	16426603	C	G	N	.	.	N	.	.	G	2	0,2	G	3	0,3	NON_SYNONYMOUS_CODING	atC/atG	TraesCS1A02G033700
chr1A	16433418	A	G	N	.	.	N	.	.	G	5	0,5	G	4	0,4	NON_SYNONYMOUS_CODING	cAt/cGt	TraesCS1A02G033800
chr1A	16434089	A	G	N	.	.	G	2	0,2	G	5	0,5	G	2	0,2	SYNONYMOUS_CODING	ggA/ggG	TraesCS1A02G033800
chr1A	16434255	T	C	C	1	0,1	C	4	0,4	C	2	0,2	C	2	0,2	SYNONYMOUS_CODING	gaT/gaC	TraesCS1A02G033800
chr1A	16435588	T	A	N	.	.	A	3	0,3	T	2	2,0	W	8	7,1	SYNONYMOUS_CODING	gtT/gtA	TraesCS1A02G033800
chr1A	16435720	T	G	N	.	.	G	3	0,3	T	2	2,0	K	9	8,1	SYNONYMOUS_CODING	ctT/ctG	TraesCS1A02G033800
chr1A	16435907	G	A	N	.	.	N	.	.	N	.	.	R	8	3,5	SYNONYMOUS_CODING	gaG/gaA	TraesCS1A02G033800
chr1A	16931992	C	A	C	9	9,0	C	4	4,0	C	1	1,0	M	3	2,1	UTR_3_PRIME
chr1A	16932090	A	G	R	14	11,3	A	8	8,0	A	1	1,0	A	6	6,0	UTR_3_PRIME
chr1A	16932205	A	G	G	28	0,28	A	16	16,0	R	15	5,10	R	12	4,8	NON_SYNONYMOUS_CODING	gTc/gCc	TraesCS1A02G034300
chr1A	16932221	C	A	C	32	32,0	C	14	14,0	M	17	15,2	C	14	14,0	NON_SYNONYMOUS_CODING	Ggc/Tgc	TraesCS1A02G034300
chr1A	16933186	G	A	A	14	0,14	G	10	10,0	R	10	6,4	R	19	11,8	SYNONYMOUS_CODING	gcC/gcT	TraesCS1A02G034300
chr1A	16933262	A	G	G	8	0,8	A	4	4,0	R	9	8,1	R	26	20,6	NON_SYNONYMOUS_CODING	cTt/cCt	TraesCS1A02G034300
chr1A	16933620	C	T	T	4	0,4	C	14	14,0	Y	11	10,1	Y	21	17,4	NON_SYNONYMOUS_CODING	gGc/gAc	TraesCS1A02G034300
chr1A	18290221	A	G	G	3	0,3	G	14	0,14	G	5	0,5	G	3	0,3	UTR_3_PRIME
chr1A	18292362	C	T	N	.	.	T	5	0,5	T	4	0,4	T	14	0,14	NON_SYNONYMOUS_CODING	cGt/cAt	TraesCS1A02G035000
chr1A	18310668	C	G	G	3	0,3	G	9	0,9	G	3	0,3	G	6	0,6	UPSTREAM
chr1A	18461151	T	C	C	1	0,1	C	6	0,6	C	2	0,2	C	10	0,10	NON_SYNONYMOUS_CODING	Acc/Gcc	TraesCS1A02G035200
chr1A	18486517	C	T	C	5	5,0	N	.	.	C	7	7,0	Y	2	1,1	SYNONYMOUS_CODING	ccG/ccA	TraesCS1A02G035300
chr1A	18489498	G	A	G	2	2,0	A	4	0,4	G	6	6,0	G	12	12,0	UTR_5_PRIME
chr1A	18489524	G	T	T	2	0,2	T	4	0,4	T	5	0,5	T	12	0,12	UTR_5_PRIME
chr1A	18820848	G	A	R	9	6,3	G	1	1,0	R	5	4,1	R	13	10,3	INTERGENIC
chr1A	18821093	G	C	G	3	3,0	S	5	2,3	S	4	3,1	S	5	4,1	INTERGENIC
chr1A	18904869	C	A	A	1	0,1	A	1	0,1	A	4	0,4	A	1	0,1	INTERGENIC
chr1A	18990083	G	A	R	3	2,1	G	1	1,0	G	1	1,0	R	2	1,1	SYNONYMOUS_CODING	atC/atT	TraesCS1A02G035500
chr1A	18991453	A	T	T	10	0,10	T	14	0,14	T	16	0,16	T	14	0,14	NON_SYNONYMOUS_CODING	Tcc/Acc	TraesCS1A02G035500
chr1A	18991526	G	A	G	11	11,0	G	25	25,0	R	25	22,3	G	17	17,0	SYNONYMOUS_CODING	gaC/gaT	TraesCS1A02G035500
chr1A	18991691	C	T	T	3	0,3	T	1	0,1	T	2	0,2	T	5	0,5	SYNONYMOUS_CODING	aaG/aaA	TraesCS1A02G035500
chr1A	19063394	G	A	N	.	.	A	2	0,2	A	4	0,4	A	3	0,3	UTR_5_PRIME
chr1A	19310004	C	T	T	1	0,1	T	1	0,1	T	2	0,2	T	2	0,2	UNKNOWN
chr1A	19310304	G	A	A	3	0,3	A	5	0,5	A	10	0,10	A	21	0,21	UNKNOWN
chr1A	19342543	G	C	C	1	0,1	N	.	.	C	5	0,5	C	5	0,5	UNKNOWN
chr1A	19343327	C	T	Y	7	3,4	N	.	.	N	.	.	Y	6	2,4	UNKNOWN
chr1A	19420746	T	G	N	.	.	N	.	.	G	4	0,4	G	3	0,3	UNKNOWN
chr1A	19449261	G	C	C	5	0,5	C	7	0,7	C	16	0,16	C	25	0,25	UNKNOWN
chr1A	19705702	A	T	T	1	0,1	N	.	.	T	2	0,2	T	3	0,3	INTERGENIC
chr1A	19705723	T	C	C	1	0,1	N	.	.	C	3	0,3	C	3	0,3	INTERGENIC
chr1A	19705864	G	A	A	12	0,12	A	5	0,5	A	19	0,19	A	34	0,34	INTERGENIC
chr1A	19706201	A	G	N	.	.	N	.	.	G	1	0,1	G	5	0,5	INTERGENIC
chr1A	19891758	G	A	A	1	0,1	A	1	0,1	A	13	0,13	A	4	0,4	NON_SYNONYMOUS_CODING	cGg/cAg	TraesCS1A02G035700
chr1A	19891800	C	T	T	1	0,1	T	1	0,1	T	10	0,10	T	3	0,3	NON_SYNONYMOUS_CODING	cCc/cTc	TraesCS1A02G035700
chr1A	19892110	T	C	N	.	.	C	3	0,3	C	14	0,14	C	8	0,8	SYNONYMOUS_CODING	ggT/ggC	TraesCS1A02G035700
chr1A	19892188	C	T	N	.	.	T	3	0,3	T	10	0,10	T	8	0,8	SYNONYMOUS_CODING	ggC/ggT	TraesCS1A02G035700
chr1A	19892345	A	T	N	.	.	N	.	.	T	7	0,7	T	4	0,4	NON_SYNONYMOUS_CODING	Acc/Tcc	TraesCS1A02G035700
chr1A	19892434	G	A	N	.	.	N	.	.	A	8	0,8	A	3	0,3	SYNONYMOUS_CODING	cgG/cgA	TraesCS1A02G035700
chr1A	19893466	A	G	N	.	.	G	3	0,3	G	9	0,9	G	1	0,1	NON_SYNONYMOUS_CODING	Att/Gtt	TraesCS1A02G035700
chr1A	19893499	C	T	T	1	0,1	T	4	0,4	T	4	0,4	T	1	0,1	SYNONYMOUS_CODING	Ctg/Ttg	TraesCS1A02G035700
chr1A	19895962	C	A	N	.	.	C	1	1,0	C	4	4,0	M	3	2,1	INTRON
chr1A	19896282	T	C	C	1	0,1	C	3	0,3	C	10	0,10	C	6	0,6	INTRON
chr1A	19897162	C	A	M	1	0,1	C	2	2,0	C	13	13,0	C	11	11,0	INTRON
chr1A	20091255	G	C	G	2	2,0	S	14	12,2	G	8	8,0	G	14	14,0	NON_SYNONYMOUS_CODING	Ggc/Cgc	TraesCS1A02G036100
chr1A	20091280	G	T	G	1	1,0	G	14	14,0	G	8	8,0	K	15	12,3	NON_SYNONYMOUS_CODING	gGg/gTg	TraesCS1A02G036100
chr1A	20091835	G	A	A	10	0,10	A	19	0,19	A	13	0,13	A	20	0,20	INTRON
chr1A	20092207	G	A	A	6	0,6	A	19	0,19	A	18	0,18	A	15	0,15	INTRON
chr1A	20095071	C	A	N	.	.	A	1	0,1	A	3	0,3	A	4	0,4	DOWNSTREAM
chr1A	20102032	C	T	T	6	0,6	N	.	.	N	.	.	T	14	0,14	INTERGENIC
chr1A	20158527	A	G	G	1	0,1	N	.	.	G	1	0,1	G	4	0,4	UTR_3_PRIME
chr1A	20181739	G	T	N	.	.	G	2	2,0	G	10	10,0	K	4	3,1	STOP_GAINED	Gag/Tag	TraesCS1A02G036300
chr1A	20183153	A	G	N	.	.	N	.	.	G	2	0,2	G	5	0,5	INTRON
chr1A	20895891	G	T	G	10	10,0	K	2	0,2	K	9	8,1	G	14	14,0	INTRON
chr1A	20896160	G	A	G	3	3,0	R	2	0,2	G	4	4,0	G	9	9,0	INTRON
chr1A	20896389	A	G	R	4	2,2	A	5	5,0	A	12	12,0	A	14	14,0	INTRON
chr1A	20896412	C	A	A	5	0,5	C	10	10,0	C	14	14,0	C	30	30,0	INTRON
chr1A	20896829	G	C	C	9	0,9	C	1	0,1	C	1	0,1	S	7	6,1	INTRON
chr1A	20925972	T	C	C	3	0,3	T	16	16,0	T	23	23,0	T	39	39,0	SYNONYMOUS_CODING	ctA/ctG	TraesCS1A02G037700
chr1A	20926242	A	G	N	.	.	N	.	.	R	6	4,2	A	8	8,0	INTRON
chr1A	20926597	C	G	S	2	0,2	C	3	3,0	C	12	12,0	C	18	18,0	INTRON
chr1A	20930937	C	T	N	.	.	Y	8	5,3	C	10	10,0	C	7	7,0	INTRON
chr1A	20931193	A	G	N	.	.	N	.	.	G	4	0,4	G	4	0,4	INTRON
chr1A	20931208	G	T	N	.	.	N	.	.	T	4	0,4	T	4	0,4	INTRON
chr1A	20931313	G	T	T	6	0,6	T	17	0,17	T	33	0,33	T	44	0,44	SYNONYMOUS_CODING	ccC/ccA	TraesCS1A02G037700
chr1A	20931409	A	G	G	2	0,2	R	12	3,9	R	22	10,12	R	20	6,14	SYNONYMOUS_CODING	ctT/ctC	TraesCS1A02G037700
chr1A	20931475	C	G	G	1	0,1	S	5	2,3	S	14	2,12	S	21	4,17	NON_SYNONYMOUS_CODING	caG/caC	TraesCS1A02G037700
chr1A	20931481	A	G	R	1	1,0	R	5	2,3	G	14	1,13	G	18	0,18	SYNONYMOUS_CODING	acT/acC	TraesCS1A02G037700
chr1A	20931772	A	G	N	.	.	G	4	0,4	G	13	0,13	G	15	0,15	SYNONYMOUS_CODING	ggT/ggC	TraesCS1A02G037700
chr1A	20931817	G	A	N	.	.	A	2	0,2	R	17	2,15	A	21	0,21	SYNONYMOUS_CODING	aaC/aaT	TraesCS1A02G037700
chr1A	20931823	G	A	N	.	.	G	2	2,0	R	18	16,2	G	22	22,0	SYNONYMOUS_CODING	aaC/aaT	TraesCS1A02G037700
chr1A	20931969	C	T	N	.	.	Y	2	0,2	C	25	25,0	C	27	27,0	NON_SYNONYMOUS_CODING	Gcc/Acc	TraesCS1A02G037700
chr1A	20935680	C	G	S	2	1,1	G	17	0,17	S	25	5,20	S	20	4,16	SYNONYMOUS_CODING	ctC/ctG	TraesCS1A02G037800
chr1A	20935713	T	C	T	6	6,0	Y	18	16,2	T	21	21,0	Y	32	23,9	SYNONYMOUS_CODING	cgT/cgC	TraesCS1A02G037800
chr1A	20935719	G	A	R	6	5,1	R	19	2,17	R	24	7,17	R	33	14,19	SYNONYMOUS_CODING	ccG/ccA	TraesCS1A02G037800
chr1A	20936383	G	A	G	21	21,0	A	8	0,8	R	25	13,12	R	30	10,20	NON_SYNONYMOUS_CODING	Ggc/Agc	TraesCS1A02G037800
chr1A	20937147	G	A	A	14	0,14	A	11	0,11	A	21	0,21	A	36	0,36	NON_SYNONYMOUS_CODING	atG/atA	TraesCS1A02G037800
chr1A	20937741	A	G	G	10	0,10	G	3	0,3	G	13	0,13	G	23	0,23	SYNONYMOUS_CODING	caA/caG	TraesCS1A02G037800
chr1A	20975751	A	T	N	.	.	T	3	0,3	T	3	0,3	T	2	0,2	DOWNSTREAM
chr1A	20975759	C	A	A	2	0,2	C	6	6,0	M	7	4,3	M	6	2,4	DOWNSTREAM
chr1A	20977798	C	T	C	43	43,0	Y	2	1,1	C	8	8,0	C	18	18,0	UTR_3_PRIME
chr1A	20979450	A	G	G	1	0,1	N	.	.	G	2	0,2	G	5	0,5	INTRON
chr1A	20979504	C	T	T	1	0,1	N	.	.	T	5	0,5	T	3	0,3	INTRON
chr1A	20980267	A	G	R	12	8,4	N	.	.	A	3	3,0	A	7	7,0	SYNONYMOUS_CODING	ctT/ctC	TraesCS1A02G037900
chr1A	20980386	A	G	G	9	0,9	N	.	.	G	3	0,3	G	3	0,3	INTRON
chr1A	20980576	A	G	G	5	0,5	N	.	.	G	5	0,5	G	9	0,9	UTR_5_PRIME
chr1A	20986437	A	C	N	.	.	C	13	0,13	C	6	0,6	C	10	0,10	DOWNSTREAM
chr1A	20988290	A	T	N	.	.	W	3	2,1	A	9	9,0	A	8	8,0	DOWNSTREAM
chr1A	20988439	T	C	N	.	.	N	.	.	C	11	0,11	C	15	0,15	DOWNSTREAM
chr1A	21040519	G	A	N	.	.	A	7	0,7	A	1	0,1	R	3	1,2	NON_SYNONYMOUS_CODING	Gag/Aag	TraesCS1A02G038400
chr1A	21043117	C	T	N	.	.	Y	5	3,2	C	1	1,0	C	6	6,0	SYNONYMOUS_CODING	gcC/gcT	TraesCS1A02G038400
chr1A	21047748	T	G	N	.	.	K	9	6,3	T	11	11,0	T	6	6,0	NON_SYNONYMOUS_CODING	cTg/cGg	TraesCS1A02G038400
chr1A	21047921	C	T	N	.	.	Y	4	2,2	C	13	13,0	C	12	12,0	SYNONYMOUS_CODING	ggC/ggT	TraesCS1A02G038400
chr1A	21065669	C	T	N	.	.	T	5	0,5	T	2	0,2	T	6	0,6	NON_SYNONYMOUS_CODING	gCt/gTt	TraesCS1A02G038500
chr1A	21065762	A	C	N	.	.	C	5	0,5	C	4	0,4	C	3	0,3	NON_SYNONYMOUS_CODING	aAa/aCa	TraesCS1A02G038500
chr1A	21067519	T	C	C	4	0,4	C	2	0,2	C	5	0,5	C	4	0,4	SYNONYMOUS_CODING	tgT/tgC	TraesCS1A02G038500
chr1A	21281988	T	G	K	2	1,1	T	3	3,0	K	17	12,5	T	33	32,1	SYNONYMOUS_CODING	atA/atC	TraesCS1A02G039100
chr1A	21282622	T	A	A	7	0,7	A	1	0,1	W	29	4,25	W	37	23,14	NON_SYNONYMOUS_CODING	Acc/Tcc	TraesCS1A02G039100
chr1A	21282717	A	G	G	7	0,7	G	2	0,2	R	29	3,26	R	36	21,15	SYNONYMOUS_CODING	aaT/aaC	TraesCS1A02G039100
chr1A	21282855	T	C	C	3	0,3	Y	4	2,2	Y	23	6,17	Y	24	13,11	SYNONYMOUS_CODING	ttA/ttG	TraesCS1A02G039100
chr1A	21282892	G	T	T	4	0,4	K	3	2,1	K	24	4,20	K	22	14,8	NON_SYNONYMOUS_CODING	gCa/gAa	TraesCS1A02G039100
chr1A	21284027	A	G	G	4	0,4	R	4	3,1	R	8	6,2	R	18	12,6	SYNONYMOUS_CODING	aaT/aaC	TraesCS1A02G039100
chr1A	21284305	T	C	C	1	0,1	N	.	.	C	4	0,4	C	2	0,2	NON_SYNONYMOUS_CODING	Agt/Ggt	TraesCS1A02G039100
chr1A	21284780	C	G	N	.	.	G	1	0,1	G	5	0,5	G	5	0,5	NON_SYNONYMOUS_CODING	Ggt/Cgt	TraesCS1A02G039100
chr1A	21322314	C	T	N	.	.	T	18	0,18	T	26	0,26	T	44	0,44	UTR_5_PRIME
chr1A	21329045	T	G	N	.	.	K	9	7,2	T	16	16,0	T	25	25,0	NON_SYNONYMOUS_CODING	gaT/gaG	TraesCS1A02G039200
chr1A	21333990	A	G	G	1	0,1	G	5	0,5	G	22	0,22	G	22	0,22	SYNONYMOUS_CODING	gaA/gaG	TraesCS1A02G039200
chr1A	21334034	T	C	T	5	5,0	T	5	5,0	T	21	21,0	Y	21	17,4	SPLICE_SITE_REGION
chr1A	21334746	G	T	T	5	0,5	T	6	1,5	T	23	0,23	T	36	0,36	SPLICE_SITE_REGION
chr1A	21618675	G	T	K	7	4,3	G	23	23,0	G	12	12,0	G	34	34,0	NON_SYNONYMOUS_CODING	Gcc/Tcc	TraesCS1A02G039400
chr1A	21619371	T	C	N	.	.	N	.	.	N	.	.	C	4	0,4	INTRON
chr1A	21621268	G	A	A	6	0,6	A	17	0,17	A	5	0,5	A	26	0,26	INTRON
chr1A	21621615	A	G	G	1	0,1	G	1	0,1	G	1	0,1	G	2	0,2	INTRON
chr1A	21624404	G	C	C	3	0,3	C	4	0,4	C	6	0,6	C	6	0,6	INTRON
chr1A	21626319	A	G	G	1	0,1	G	1	0,1	N	.	.	G	4	0,4	INTRON
chr1A	21986133	A	G	G	1	0,1	G	6	0,6	G	23	0,23	G	26	0,26	SYNONYMOUS_CODING	agT/agC	TraesCS1A02G039800
chr1A	21986541	C	T	C	1	1,0	C	28	28,0	C	14	13,1	Y	41	27,14	SYNONYMOUS_CODING	gtG/gtA	TraesCS1A02G039800
chr1A	21986585	T	C	C	1	0,1	C	22	0,22	C	19	0,19	C	37	0,37	NON_SYNONYMOUS_CODING	Agc/Ggc	TraesCS1A02G039800
chr1A	22038172	T	G	N	.	.	G	1	0,1	G	3	0,3	G	2	0,2	DOWNSTREAM
chr1A	22039159	G	A	N	.	.	N	.	.	A	4	0,4	A	3	0,3	SYNONYMOUS_CODING	ctC/ctT	TraesCS1A02G039900
chr1A	22039288	A	T	N	.	.	N	.	.	N	.	.	T	5	0,5	NON_SYNONYMOUS_CODING	aaT/aaA	TraesCS1A02G039900
chr1A	22039424	C	G	G	1	0,1	N	.	.	G	2	0,2	G	6	0,6	NON_SYNONYMOUS_CODING	cGg/cCg	TraesCS1A02G039900
chr1A	22039477	T	C	C	1	0,1	N	.	.	C	2	0,2	C	3	0,3	SYNONYMOUS_CODING	caA/caG	TraesCS1A02G039900
chr1A	22040162	T	G	N	.	.	N	.	.	N	.	.	G	4	0,4	NON_SYNONYMOUS_CODING	gAg/gCg	TraesCS1A02G039900
chr1A	22040338	T	C	N	.	.	N	.	.	C	4	0,4	C	3	0,3	SYNONYMOUS_CODING	gtA/gtG	TraesCS1A02G039900
chr1A	22300195	T	C	C	5	0,5	C	4	0,4	C	8	0,8	C	24	0,24	INTRON
chr1A	22561607	C	T	T	1	0,1	T	3	0,3	T	1	0,1	T	3	0,3	DOWNSTREAM
chr1A	22817194	A	G	N	.	.	N	.	.	G	6	0,6	G	7	0,7	SYNONYMOUS_CODING	gaT/gaC	TraesCS1A02G042100
chr1A	22817513	G	A	N	.	.	A	7	0,7	N	.	.	A	2	0,2	NON_SYNONYMOUS_CODING	aCa/aTa	TraesCS1A02G042100
chr1A	22824663	T	C	N	.	.	C	2	0,2	N	.	.	C	3	0,3	INTERGENIC
chr1A	22920584	C	A	C	1	1,0	C	8	8,0	M	17	15,2	C	7	7,0	UNKNOWN
chr1A	23180315	C	G	N	.	.	C	1	1,0	C	1	1,0	S	4	2,2	UNKNOWN
chr1A	23180478	A	G	N	.	.	G	2	0,2	R	4	1,3	G	7	0,7	UNKNOWN
chr1A	23181162	T	C	T	7	7,0	C	7	0,7	Y	9	2,7	Y	14	5,9	UNKNOWN
chr1A	23182404	T	C	Y	1	1,0	C	11	0,11	Y	7	2,5	Y	13	7,6	UNKNOWN
chr1A	23183012	T	A	N	.	.	A	2	0,2	W	8	1,7	W	7	2,5	UNKNOWN
chr1A	23185496	A	G	G	1	0,1	G	2	0,2	G	1	0,1	G	3	0,3	UNKNOWN
chr1A	23186524	T	C	T	3	3,0	C	5	0,5	Y	5	1,4	Y	6	3,3	UNKNOWN
chr1A	23422008	T	C	N	.	.	C	2	0,2	C	1	0,1	C	2	0,2	SYNONYMOUS_CODING	gcT/gcC	TraesCS1A02G042800
chr1A	23429057	T	C	C	4	0,4	C	11	0,11	C	8	0,8	C	20	0,20	INTERGENIC
chr1A	23429205	C	T	T	3	0,3	T	7	0,7	T	4	0,4	T	8	0,8	INTERGENIC
chr1A	23432536	A	G	G	1	0,1	G	3	0,3	G	9	0,9	G	14	0,14	INTERGENIC
chr1A	23432735	G	A	A	2	0,2	A	5	0,5	A	7	0,7	A	10	0,10	INTERGENIC
chr1A	23433764	T	C	N	.	.	N	.	.	C	6	0,6	C	4	0,4	INTERGENIC
chr1A	23433963	T	C	C	1	0,1	C	1	0,1	C	5	0,5	C	5	0,5	INTERGENIC
chr1A	23434044	C	T	T	1	0,1	T	1	0,1	N	.	.	T	5	0,5	INTERGENIC
chr1A	23436088	C	A	A	1	0,1	A	6	0,6	A	4	0,4	A	9	0,9	INTERGENIC
chr1A	23436105	C	T	T	1	0,1	T	6	0,6	T	4	0,4	T	9	0,9	INTERGENIC
chr1A	23436249	G	A	N	.	.	N	.	.	A	2	0,2	A	5	0,5	INTERGENIC
chr1A	23436260	A	C	N	.	.	N	.	.	C	2	0,2	C	5	0,5	INTERGENIC
chr1A	23968616	T	C	Y	1	1,0	C	2	0,2	C	1	0,1	Y	2	1,1	INTRON
chr1A	24133342	G	A	N	.	.	A	2	0,2	A	4	0,4	A	1	0,1	INTRON
chr1A	24137468	A	G	A	9	9,0	G	4	0,4	G	1	0,1	R	8	6,2	SYNONYMOUS_CODING	acA/acG	TraesCS1A02G043400
chr1A	24139192	G	A	G	4	4,0	A	3	0,3	R	5	2,3	G	8	8,0	NON_SYNONYMOUS_CODING	aGg/aAg	TraesCS1A02G043400
chr1A	24140095	G	C	G	10	10,0	C	4	0,4	C	9	0,9	S	18	14,4	UTR_3_PRIME
chr1A	24319376	A	G	A	1	1,0	N	.	.	N	.	.	R	10	7,3	INTRON
chr1A	24319611	C	T	Y	1	1,0	T	3	0,3	N	.	.	Y	11	4,7	INTRON
chr1A	24319736	C	T	N	.	.	T	2	0,2	T	1	0,1	Y	4	3,1	INTRON
chr1A	24321480	G	A	N	.	.	N	.	.	N	.	.	A	5	0,5	UTR_3_PRIME
chr1A	24560021	C	G	N	.	.	N	.	.	G	1	0,1	G	5	0,5	INTERGENIC
chr1A	24562752	T	C	N	.	.	C	14	0,14	C	3	0,3	C	7	0,7	UNKNOWN
chr1A	24563186	T	A	N	.	.	N	.	.	A	2	0,2	A	3	0,3	UNKNOWN
chr1A	24567694	G	C	N	.	.	C	1	0,1	N	.	.	C	4	0,4	UNKNOWN
chr1A	24567962	C	G	N	.	.	G	2	0,2	N	.	.	S	3	1,2	UNKNOWN
chr1A	24568305	G	A	N	.	.	A	13	0,13	A	16	0,16	A	16	0,16	UNKNOWN
chr1A	24569095	T	C	N	.	.	C	3	0,3	N	.	.	C	3	0,3	UNKNOWN
chr1A	24570313	T	G	N	.	.	G	4	0,4	G	6	0,6	G	10	0,10	UNKNOWN
chr1A	24570366	C	A	N	.	.	A	3	0,3	A	5	0,5	A	8	0,8	UNKNOWN
chr1A	24570923	T	C	N	.	.	C	4	0,4	C	5	0,5	C	5	0,5	UNKNOWN
chr1A	24570972	A	G	N	.	.	G	4	0,4	G	5	0,5	G	4	0,4	UNKNOWN
chr1A	24767687	C	T	N	.	.	T	5	0,5	T	13	0,13	T	8	0,8	SYNONYMOUS_CODING	agC/agT	TraesCS1A02G044000
chr1A	24767734	A	G	N	.	.	G	16	0,16	G	18	0,18	G	11	0,11	NON_SYNONYMOUS_CODING	cAa/cGa	TraesCS1A02G044000
chr1A	24767740	A	G	N	.	.	G	19	0,19	G	19	0,19	G	12	0,12	NON_SYNONYMOUS_CODING	gAt/gGt	TraesCS1A02G044000
chr1A	24768724	A	G	R	1	1,0	R	7	1,6	R	16	3,13	R	17	6,11	SYNONYMOUS_CODING	caA/caG	TraesCS1A02G044000
chr1A	24768820	A	G	N	.	.	G	5	0,5	G	12	0,12	G	15	0,15	SYNONYMOUS_CODING	aaA/aaG	TraesCS1A02G044000
chr1A	24770809	G	A	N	.	.	N	.	.	A	2	0,2	A	4	0,4	NON_SYNONYMOUS_CODING	cGt/cAt	TraesCS1A02G044000
chr1A	24943785	C	T	C	12	12,0	T	8	0,8	Y	10	2,8	Y	20	7,13	UTR_3_PRIME
chr1A	24943889	T	C	T	17	17,0	C	5	0,5	Y	17	2,15	Y	29	8,21	NON_SYNONYMOUS_CODING	aAc/aGc	TraesCS1A02G044200
chr1A	24943920	C	G	C	16	16,0	G	8	0,8	G	16	1,15	S	25	8,17	NON_SYNONYMOUS_CODING	Gtt/Ctt	TraesCS1A02G044200
chr1A	24944708	A	G	A	9	9,0	G	10	0,10	R	27	11,16	R	40	27,13	NON_SYNONYMOUS_CODING	cTg/cCg	TraesCS1A02G044200
chr1A	25541481	T	C	T	1	1,0	N	.	.	Y	1	0,1	Y	5	4,1	INTRON
chr1A	25541567	G	T	G	1	1,0	N	.	.	T	3	0,3	K	3	2,1	INTRON
chr1A	25542934	G	A	N	.	.	A	7	0,7	R	5	2,3	A	8	0,8	INTRON
chr1A	25543837	G	C	G	6	6,0	S	2	1,1	G	3	3,0	G	7	7,0	INTRON
chr1A	25545051	T	C	T	15	15,0	Y	14	10,4	T	23	23,0	T	33	32,1	UTR_3_PRIME
chr1A	25545858	G	A	G	11	11,0	G	4	4,0	G	5	5,0	R	13	10,3	NON_SYNONYMOUS_CODING	Gcc/Acc	TraesCS1A02G044600
chr1A	25545972	C	A	C	4	4,0	A	1	0,1	A	2	0,2	M	7	2,5	NON_SYNONYMOUS_CODING	Cgt/Agt	TraesCS1A02G044600
chr1A	25708897	C	T	C	1	1,0	C	11	11,0	Y	19	16,3	C	16	16,0	UTR_3_PRIME
chr1A	25709005	C	G	C	2	2,0	G	3	0,3	G	14	0,14	S	7	3,4	UTR_3_PRIME
chr1A	25922682	A	G	N	.	.	G	1	0,1	G	1	0,1	R	7	2,5	UNKNOWN
chr1A	25922747	G	A	G	4	4,0	A	4	0,4	N	.	.	R	5	2,3	UNKNOWN
chr1A	25961047	T	C	C	2	0,2	N	.	.	C	5	0,5	C	8	0,8	UNKNOWN
chr1A	25961192	C	T	N	.	.	N	.	.	T	4	0,4	T	4	0,4	UNKNOWN
chr1A	25961212	G	A	N	.	.	N	.	.	G	1	1,0	R	5	1,4	UNKNOWN
chr1A	26962335	T	C	T	2	2,0	C	42	0,42	Y	11	3,8	Y	24	12,12	SYNONYMOUS_CODING	cgA/cgG	TraesCS1A02G045300
chr1A	26962776	G	A	N	.	.	N	.	.	R	8	6,2	G	8	8,0	UPSTREAM
chr1A	26965719	A	G	R	2	2,0	G	3	0,3	R	6	1,5	G	7	0,7	UTR_3_PRIME
chr1A	26965769	A	T	A	4	4,0	T	5	0,5	W	9	1,8	T	14	0,14	UTR_3_PRIME
chr1A	26966767	T	C	Y	1	0,1	T	4	4,0	T	3	3,0	Y	5	3,2	INTRON
chr1A	26967362	T	C	N	.	.	N	.	.	C	1	0,1	Y	7	3,4	INTRON
chr1A	26967510	A	C	A	4	4,0	C	5	0,5	C	16	0,16	M	15	8,7	INTRON
chr1A	26967924	A	G	N	.	.	G	8	0,8	R	4	1,3	R	21	2,19	INTRON
chr1A	27249531	G	T	N	.	.	N	.	.	G	2	2,0	K	3	2,1	INTRON
chr1A	27250208	G	T	N	.	.	T	2	0,2	K	1	1,0	K	4	1,3	INTRON
chr1A	27253077	T	A	N	.	.	A	3	0,3	A	3	0,3	A	2	0,2	INTRON
chr1A	27260698	T	G	K	2	0,2	N	.	.	T	10	10,0	T	38	38,0	UTR_3_PRIME
chr1A	27260763	G	T	K	1	0,1	N	.	.	G	4	4,0	G	20	20,0	UTR_3_PRIME
chr1A	27260838	C	T	Y	1	0,1	N	.	.	C	3	3,0	C	15	15,0	UTR_3_PRIME
chr1A	27279828	A	G	G	1	0,1	N	.	.	N	.	.	G	4	0,4	INTERGENIC
chr1A	27281263	T	C	C	1	0,1	N	.	.	N	.	.	C	7	0,7	INTERGENIC
chr1A	27395901	T	C	N	.	.	N	.	.	C	6	0,6	C	4	0,4	INTERGENIC
chr1A	27396171	G	A	A	3	0,3	G	5	5,0	G	11	11,0	G	9	9,0	INTERGENIC
chr1A	27397924	C	T	T	1	0,1	T	5	0,5	Y	2	2,0	Y	5	1,4	INTERGENIC
chr1A	27398158	C	A	A	2	0,2	N	.	.	A	1	0,1	A	3	0,3	INTERGENIC
chr1A	27399034	T	C	T	9	9,0	Y	6	3,3	T	15	14,1	T	7	7,0	INTERGENIC
chr1A	27753454	A	G	G	1	0,1	G	4	0,4	R	3	1,2	R	41	24,17	NON_SYNONYMOUS_CODING	aAg/aGg	TraesCS1A02G046300
chr1A	27753516	G	C	S	4	1,3	G	4	4,0	G	3	3,0	G	36	36,0	NON_SYNONYMOUS_CODING	Gag/Cag	TraesCS1A02G046300
chr1A	27753633	A	G	G	5	0,5	G	1	0,1	R	2	1,1	R	25	16,9	NON_SYNONYMOUS_CODING	gAt/gGt	TraesCS1A02G046300
chr1A	27754758	A	G	A	5	5,0	A	1	1,0	N	.	.	R	20	15,5	NON_SYNONYMOUS_CODING	Agt/Ggt	TraesCS1A02G046300
chr1A	27756313	T	C	T	3	3,0	C	6	0,6	Y	5	3,2	Y	15	9,6	NON_SYNONYMOUS_CODING	Tct/Cct	TraesCS1A02G046300
chr1A	27756553	T	G	T	7	7,0	T	5	5,0	K	17	14,3	T	34	34,0	NON_SYNONYMOUS_CODING	gaT/gaG	TraesCS1A02G046300
chr1A	27756621	T	C	C	7	0,7	C	6	0,6	Y	9	2,7	Y	20	10,10	NON_SYNONYMOUS_CODING	tTg/tCg	TraesCS1A02G046300
chr1A	27756636	T	C	T	7	7,0	C	7	0,7	Y	6	2,4	Y	28	14,14	UTR_3_PRIME
chr1A	28363221	T	C	C	1	0,1	C	2	0,2	Y	6	1,5	C	7	0,7	INTRON
chr1A	28363894	G	A	A	2	0,2	N	.	.	R	2	1,1	G	8	8,0	INTRON
chr1A	28363921	T	G	G	2	0,2	N	.	.	K	3	1,2	T	8	8,0	INTRON
chr1A	28615467	A	T	W	1	1,0	T	1	0,1	T	5	0,5	W	11	9,2	INTRON
chr1A	28615596	T	G	T	1	1,0	N	.	.	K	1	0,1	K	3	2,1	INTRON
chr1A	28615858	T	G	G	2	0,2	N	.	.	N	.	.	T	8	8,0	INTRON
chr1A	28617829	T	C	N	.	.	T	5	5,0	Y	9	7,2	T	11	11,0	INTRON
chr1A	28618007	C	T	N	.	.	N	.	.	T	3	0,3	T	4	0,4	INTRON
chr1A	28620422	G	C	C	22	0,22	N	.	.	G	4	4,0	G	39	39,0	UTR_3_PRIME
chr1A	28625532	A	G	A	10	10,0	G	6	0,6	R	14	2,12	R	28	11,17	INTRON
chr1A	28625551	C	T	T	8	0,8	T	6	0,6	Y	9	2,7	Y	27	11,16	INTRON
chr1A	28626173	A	T	N	.	.	T	9	0,9	T	15	0,15	W	17	2,15	INTRON
chr1A	28626659	T	C	T	10	10,0	C	15	0,15	Y	23	3,20	Y	27	5,22	INTRON
chr1A	28627096	A	T	A	2	2,0	T	2	0,2	T	9	1,8	W	3	1,2	DOWNSTREAM
chr1A	28628692	C	T	C	2	2,0	N	.	.	Y	7	3,4	C	7	7,0	UPSTREAM
chr1A	28628817	T	A	T	1	1,0	N	.	.	A	3	0,3	T	8	8,0	UPSTREAM
chr1A	28716285	G	A	A	1	0,1	N	.	.	A	3	0,3	A	2	0,2	INTRON
chr1A	28720455	A	G	N	.	.	G	1	0,1	G	3	0,3	G	5	0,5	UPSTREAM
chr1A	28720518	G	A	N	.	.	A	1	0,1	A	3	0,3	A	5	0,5	UPSTREAM
chr1A	28748996	G	A	N	.	.	A	2	0,2	N	.	.	A	4	0,4	INTERGENIC
chr1A	28758860	G	A	A	1	0,1	A	1	0,1	A	10	0,10	A	17	0,17	INTRON
chr1A	28758978	A	G	A	4	4,0	R	7	4,3	A	7	7,0	A	23	23,0	INTRON
chr1A	28759250	C	A	A	2	0,2	A	12	0,12	A	10	0,10	A	25	0,25	INTRON
chr1A	28759465	C	A	C	8	8,0	C	6	6,0	M	10	8,2	C	14	14,0	SPLICE_SITE_DONOR
chr1A	28762888	C	A	A	3	0,3	A	4	0,4	A	4	0,4	A	4	0,4	UTR_5_PRIME
chr1A	28912605	C	T	T	2	0,2	N	.	.	T	6	0,6	Y	11	2,9	INTERGENIC
chr1A	29123337	C	T	N	.	.	T	1	0,1	N	.	.	T	8	0,8	INTERGENIC
chr1A	29124084	T	A	N	.	.	A	1	0,1	A	3	0,3	A	2	0,2	INTERGENIC
chr1A	29186714	T	C	N	.	.	N	.	.	C	4	0,4	C	8	0,8	UTR_5_PRIME
chr1A	29189913	A	G	N	.	.	N	.	.	G	3	0,3	G	5	0,5	NON_SYNONYMOUS_CODING	Atc/Gtc	TraesCS1A02G047200
chr1A	29609057	G	A	N	.	.	N	.	.	N	.	.	R	5	1,4	INTRON
chr1A	29609063	C	T	N	.	.	N	.	.	N	.	.	Y	5	1,4	INTRON
chr1A	29610131	C	T	N	.	.	T	2	0,2	T	2	0,2	Y	13	5,8	INTRON
chr1A	29610146	G	A	N	.	.	A	2	0,2	A	2	0,2	R	13	5,8	INTRON
chr1A	29610423	G	A	G	10	10,0	A	2	0,2	A	1	0,1	R	10	6,4	INTRON
chr1A	29610764	G	T	G	4	4,0	G	3	3,0	G	2	2,0	K	7	5,2	INTRON
chr1A	29611921	A	G	A	3	3,0	G	3	0,3	R	13	4,9	R	5	2,3	SYNONYMOUS_STOP	tAa/tGa	TraesCS1A02G047500
chr1A	29801005	T	C	N	.	.	T	4	4,0	Y	8	5,3	T	7	7,0	NON_SYNONYMOUS_CODING	aTg/aCg	TraesCS1A02G048100
chr1A	29801201	A	G	N	.	.	G	6	0,6	G	14	1,13	G	7	0,7	SYNONYMOUS_CODING	aaA/aaG	TraesCS1A02G048100
chr1A	29801372	A	G	N	.	.	G	3	0,3	R	18	7,11	R	19	10,9	SYNONYMOUS_CODING	tcA/tcG	TraesCS1A02G048100
chr1A	29801475	C	T	N	.	.	C	6	6,0	C	13	12,1	Y	18	14,4	SYNONYMOUS_CODING	Cta/Tta	TraesCS1A02G048100
chr1A	29801504	C	T	N	.	.	C	5	5,0	C	13	12,1	Y	18	14,4	SYNONYMOUS_CODING	caC/caT	TraesCS1A02G048100
chr1A	29804605	A	G	N	.	.	G	8	0,8	R	8	2,6	R	5	4,1	DOWNSTREAM
chr1A	29804907	G	A	N	.	.	A	10	0,10	A	7	0,7	R	13	8,5	DOWNSTREAM
chr1A	29984692	T	A	N	.	.	A	1	0,1	A	2	0,2	A	5	0,5	INTERGENIC
chr1A	30130449	C	A	C	3	3,0	C	8	8,0	M	8	6,2	C	7	7,0	UNKNOWN
chr1A	30130927	C	T	N	.	.	N	.	.	T	1	0,1	Y	7	6,1	UNKNOWN
chr1A	30139500	T	C	N	.	.	N	.	.	N	.	.	Y	6	2,4	DOWNSTREAM
chr1A	30181305	G	C	G	4	4,0	N	.	.	N	.	.	S	18	15,3	NON_SYNONYMOUS_CODING	Gaa/Caa	TraesCS1A02G048600
chr1A	30183959	G	A	G	1	1,0	N	.	.	G	1	1,0	R	8	6,2	NON_SYNONYMOUS_CODING	Gca/Aca	TraesCS1A02G048600
chr1A	30184045	A	G	A	1	1,0	N	.	.	N	.	.	R	11	9,2	SYNONYMOUS_CODING	acA/acG	TraesCS1A02G048600
chr1A	30185520	C	T	C	2	2,0	N	.	.	Y	1	0,1	C	8	8,0	SYNONYMOUS_CODING	gaC/gaT	TraesCS1A02G048600
chr1A	30188165	G	T	G	8	8,0	N	.	.	N	.	.	K	11	9,2	NON_SYNONYMOUS_CODING	Gcc/Tcc	TraesCS1A02G048600
chr1A	30193098	G	A	R	2	0,2	N	.	.	G	2	2,0	G	9	9,0	DOWNSTREAM
chr1A	30196758	C	T	N	.	.	T	5	0,5	Y	13	1,12	Y	19	6,13	UTR_3_PRIME
chr1A	30196772	G	T	N	.	.	T	6	0,6	T	18	1,17	K	22	7,15	UTR_3_PRIME
chr1A	30797007	C	T	Y	2	0,2	C	11	11,0	C	6	6,0	C	19	19,0	SYNONYMOUS_CODING	ccG/ccA	TraesCS1A02G049300
chr1A	30798234	T	C	Y	2	0,2	T	3	3,0	T	7	7,0	T	16	16,0	NON_SYNONYMOUS_CODING	gAc/gGc	TraesCS1A02G049300
chr1A	31151664	A	G	R	1	1,0	N	.	.	G	13	0,13	R	3	1,2	UNKNOWN
chr1A	31154059	A	G	A	6	6,0	A	10	10,0	A	19	19,0	R	26	20,6	UNKNOWN
chr1A	31252378	A	G	A	3	3,0	G	16	0,16	R	15	4,11	R	21	6,15	DOWNSTREAM
chr1A	31253377	C	T	C	4	4,0	T	8	0,8	Y	37	9,28	Y	27	9,18	NON_SYNONYMOUS_CODING	Gtg/Atg	TraesCS1A02G049600
chr1A	31779240	T	C	N	.	.	C	5	0,5	Y	5	1,4	Y	5	2,3	SYNONYMOUS_CODING	aaT/aaC	TraesCS1A02G049700
chr1A	31779285	T	C	C	4	0,4	C	16	0,16	C	16	1,15	Y	40	20,20	SYNONYMOUS_CODING	cgT/cgC	TraesCS1A02G049700
chr1A	31779796	T	G	T	6	6,0	G	14	0,14	G	21	1,20	K	40	22,18	INTRON
chr1A	31781811	C	G	G	12	0,12	C	18	18,0	C	28	28,0	C	29	29,0	UTR_3_PRIME
chr1A	32087969	C	T	N	.	.	N	.	.	C	3	3,0	Y	7	4,3	INTRON
chr1A	32111328	T	C	N	.	.	N	.	.	Y	7	3,4	Y	3	2,1	SYNONYMOUS_CODING	taT/taC	TraesCS1A02G050200
chr1A	32527536	G	T	T	2	0,2	T	2	0,2	T	26	0,26	K	33	9,24	UNKNOWN
chr1A	32527580	C	G	G	2	0,2	N	.	.	N	.	.	S	3	2,1	UNKNOWN
chr1A	32527771	G	C	C	2	0,2	C	11	0,11	C	28	0,28	C	43	1,42	UNKNOWN
chr1A	32527835	G	A	A	2	0,2	A	3	0,3	N	.	.	A	7	0,7	UNKNOWN
chr1A	32527962	A	T	N	.	.	T	2	0,2	N	.	.	T	8	0,8	UNKNOWN
chr1A	32527998	C	T	N	.	.	C	4	4,0	N	.	.	Y	11	8,3	UNKNOWN
chr1A	32528079	C	T	N	.	.	T	2	0,2	T	2	0,2	T	14	0,14	UNKNOWN
chr1A	32528165	T	G	N	.	.	G	2	0,2	G	3	0,3	G	14	0,14	UNKNOWN
chr1A	32529736	C	T	T	8	0,8	T	8	0,8	T	12	0,12	Y	39	11,28	UNKNOWN
chr1A	32529780	T	C	C	10	0,10	C	8	0,8	C	19	0,19	Y	49	13,36	UNKNOWN
chr1A	32529974	C	T	C	6	6,0	T	8	0,8	Y	22	3,19	Y	24	15,9	UNKNOWN
chr1A	32531878	C	A	M	3	1,2	C	7	7,0	C	13	13,0	C	20	20,0	UNKNOWN
chr1A	32532055	C	A	C	3	3,0	C	7	7,0	M	10	8,2	C	16	16,0	UNKNOWN
chr1A	32532075	T	C	C	3	0,3	T	6	6,0	T	10	10,0	T	16	16,0	UNKNOWN
chr1A	32532137	C	G	N	.	.	G	6	0,6	G	12	0,12	S	17	8,9	UNKNOWN
chr1A	32533345	T	C	N	.	.	N	.	.	Y	5	3,2	Y	7	4,3	UNKNOWN
chr1A	32533388	T	C	N	.	.	N	.	.	C	5	0,5	C	9	0,9	UNKNOWN
chr1A	32533587	A	G	N	.	.	N	.	.	R	10	5,5	R	5	1,4	UNKNOWN
chr1A	32533666	T	A	N	.	.	N	.	.	W	10	5,5	W	4	1,3	UNKNOWN
chr1A	32533690	A	G	N	.	.	N	.	.	R	7	4,3	R	2	1,1	UNKNOWN
chr1A	32534003	A	G	G	1	0,1	G	4	0,4	R	7	2,5	R	22	18,4	UNKNOWN
chr1A	32543609	A	G	G	1	0,1	G	5	0,5	N	.	.	G	4	0,4	UPSTREAM
chr1A	32543686	G	A	A	2	0,2	A	6	0,6	A	3	0,3	A	14	0,14	UPSTREAM
chr1A	32543860	T	G	G	2	0,2	G	2	0,2	G	1	0,1	G	4	0,4	UPSTREAM
chr1A	32847872	G	A	G	2	2,0	G	3	3,0	G	4	3,1	R	12	3,9	UNKNOWN
chr1A	32852377	C	T	N	.	.	T	1	0,1	T	3	0,3	T	4	0,4	UNKNOWN
chr1A	32854245	A	G	N	.	.	G	1	0,1	R	6	2,4	R	3	1,2	INTERGENIC
chr1A	32854575	A	G	N	.	.	G	3	0,3	G	1	0,1	G	9	0,9	INTERGENIC
chr1A	32854817	T	G	N	.	.	G	9	0,9	G	2	0,2	K	4	2,2	INTERGENIC
chr1A	32855711	A	T	N	.	.	T	1	0,1	N	.	.	T	9	0,9	INTERGENIC
chr1A	32855918	G	A	N	.	.	N	.	.	N	.	.	A	7	0,7	INTERGENIC
chr1A	32856256	A	G	N	.	.	G	4	0,4	G	3	0,3	G	2	0,2	INTERGENIC
chr1A	32891830	C	T	T	10	0,10	C	8	8,0	C	35	35,0	C	31	31,0	SYNONYMOUS_CODING	gaC/gaT	TraesCS1A02G051300
chr1A	33022137	C	T	N	.	.	T	1	0,1	T	1	0,1	Y	12	4,8	INTRON
chr1A	33022434	A	G	N	.	.	G	1	0,1	G	8	0,8	R	5	2,3	UTR_3_PRIME
chr1A	33362009	A	G	G	9	0,9	A	6	6,0	R	9	8,1	A	14	14,0	UNKNOWN
chr1A	33362409	A	G	N	.	.	G	3	0,3	R	3	1,2	R	18	4,14	UNKNOWN
chr1A	33362705	C	T	T	1	0,1	T	4	0,4	Y	7	2,5	Y	16	6,10	UNKNOWN
chr1A	33362850	A	G	G	4	0,4	G	3	0,3	R	1	1,0	R	9	4,5	UNKNOWN
chr1A	33363993	T	G	N	.	.	G	12	0,12	G	6	0,6	K	19	4,15	UNKNOWN
chr1A	33364207	G	A	R	2	0,2	G	5	5,0	G	10	10,0	G	7	7,0	UNKNOWN
chr1A	33364267	G	A	A	1	0,1	A	9	0,9	A	7	0,7	A	7	0,7	UNKNOWN
chr1A	33364336	G	A	R	2	2,0	A	11	0,11	A	5	0,5	A	10	0,10	UNKNOWN
chr1A	33365061	T	C	N	.	.	N	.	.	C	1	0,1	Y	4	2,2	UNKNOWN
chr1A	33371260	C	T	T	12	0,12	T	1	0,1	Y	15	8,7	Y	46	20,26	INTRON
chr1A	33371733	C	T	T	1	0,1	T	3	0,3	Y	11	6,5	Y	39	12,27	INTRON
chr1A	33371750	A	G	G	1	0,1	G	2	0,2	R	11	6,5	R	38	12,26	INTRON
chr1A	33373631	A	G	A	6	6,0	N	.	.	G	1	0,1	R	6	3,3	DOWNSTREAM
chr1A	33373656	C	T	T	10	0,10	C	7	7,0	C	2	2,0	C	7	7,0	NON_SYNONYMOUS_CODING	Gac/Aac	TraesCS1A02G051800
chr1A	33374325	G	A	A	1	0,1	A	1	0,1	A	6	0,6	A	4	0,4	INTRON
chr1A	33374430	G	T	N	.	.	N	.	.	T	3	0,3	T	4	0,4	INTRON
chr1A	33374447	A	T	N	.	.	N	.	.	T	3	0,3	T	4	0,4	SPLICE_SITE_DONOR
chr1A	33374548	G	T	G	16	16,0	T	4	0,4	K	9	3,6	K	13	8,5	STOP_GAINED	taC/taA	TraesCS1A02G051800
chr1A	33374827	T	C	C	13	0,13	C	6	0,6	C	41	1,40	Y	18	7,11	SYNONYMOUS_CODING	cgA/cgG	TraesCS1A02G051800
chr1A	33375488	A	G	A	27	27,0	G	17	0,17	G	20	0,20	R	14	6,8	UTR_3_PRIME
chr1A	33376569	C	T	T	1	0,1	T	3	0,3	Y	6	3,3	Y	4	2,2	INTRON
chr1A	33377166	G	A	N	.	.	A	2	0,2	A	1	0,1	R	6	3,3	INTRON
chr1A	34148358	G	A	G	13	13,0	A	13	0,13	R	12	1,11	R	23	9,14	INTRON
chr1A	34149433	A	G	A	3	3,0	A	11	11,0	A	5	5,0	R	14	12,2	INTRON
chr1A	34159799	G	A	N	.	.	A	7	0,7	N	.	.	R	5	2,3	INTRON
chr1A	34159830	A	G	N	.	.	A	7	7,0	N	.	.	R	5	3,2	INTRON
chr1A	34160362	T	C	N	.	.	C	5	0,5	C	21	0,21	C	5	0,5	INTRON
chr1A	34160574	T	C	Y	1	1,0	C	4	0,4	C	4	0,4	C	7	0,7	INTRON
chr1A	34161623	C	T	N	.	.	T	3	0,3	T	7	0,7	T	4	0,4	INTRON
chr1A	34161671	G	A	N	.	.	A	5	0,5	A	6	0,6	A	5	0,5	INTRON
chr1A	34161910	T	G	N	.	.	G	18	0,18	G	13	0,13	G	28	2,26	INTRON
chr1A	34167465	A	G	N	.	.	N	.	.	N	.	.	R	7	2,5	INTRON
chr1A	34169160	G	C	G	2	2,0	S	6	4,2	G	6	6,0	G	10	10,0	INTRON
chr1A	34169212	A	G	R	1	1,0	G	5	0,5	R	6	2,4	R	13	6,7	INTRON
chr1A	34170459	A	G	N	.	.	N	.	.	G	2	0,2	R	5	3,2	INTRON
chr1A	34171559	A	G	N	.	.	N	.	.	N	.	.	G	5	0,5	INTRON
chr1A	34406643	T	C	T	5	5,0	C	5	0,5	Y	4	1,3	Y	5	1,4	INTRON
chr1A	34407176	C	T	C	19	19,0	C	11	11,0	C	25	25,0	Y	21	17,4	NON_SYNONYMOUS_CODING	Gat/Aat	TraesCS1A02G052300
chr1A	34407651	G	A	N	.	.	A	2	0,2	A	1	0,1	R	7	1,6	INTRON
chr1A	34408443	C	T	C	3	3,0	T	2	0,2	N	.	.	Y	3	1,2	INTRON
chr1A	34409185	G	A	N	.	.	N	.	.	A	1	0,1	R	3	2,1	INTRON
chr1A	34425682	G	A	N	.	.	N	.	.	A	2	0,2	A	3	0,3	INTRON
chr1A	34425700	A	G	N	.	.	N	.	.	G	1	0,1	G	4	0,4	INTRON
chr1A	34425746	T	C	N	.	.	N	.	.	C	4	0,4	Y	2	1,1	INTRON
chr1A	34426139	G	T	N	.	.	T	6	0,6	T	10	0,10	T	17	0,17	INTRON
chr1A	34426242	T	C	N	.	.	C	4	0,4	C	6	0,6	C	9	0,9	INTRON
chr1A	34426437	A	T	N	.	.	T	17	0,17	T	10	0,10	T	21	0,21	INTRON
chr1A	34426589	C	A	N	.	.	C	19	19,0	M	15	13,2	C	22	22,0	NON_SYNONYMOUS_CODING	aaC/aaA	TraesCS1A02G052400
chr1A	34426805	C	T	N	.	.	T	3	0,3	T	2	0,2	T	19	0,19	NON_SYNONYMOUS_CODING	gCg/gTg	TraesCS1A02G052400
chr1A	34427057	A	C	N	.	.	C	7	0,7	C	20	0,20	C	26	0,26	NON_SYNONYMOUS_CODING	gAg/gCg	TraesCS1A02G052400
chr1A	34427724	A	G	N	.	.	G	6	0,6	G	11	0,11	G	10	0,10	DOWNSTREAM
chr1A	34427852	G	A	N	.	.	A	7	0,7	A	8	0,8	A	18	0,18	DOWNSTREAM
chr1A	34427954	C	G	N	.	.	G	7	0,7	G	3	0,3	G	21	0,21	DOWNSTREAM
chr1A	34428073	C	T	N	.	.	T	2	0,2	T	3	0,3	T	5	0,5	DOWNSTREAM
chr1A	34428097	T	G	N	.	.	G	11	0,11	G	6	0,6	G	9	0,9	DOWNSTREAM
chr1A	34428390	C	G	N	.	.	G	7	0,7	G	18	0,18	G	18	0,18	DOWNSTREAM
chr1A	34428518	G	C	N	.	.	N	.	.	C	9	0,9	C	3	0,3	DOWNSTREAM
chr1A	34920893	C	T	C	4	4,0	N	.	.	N	.	.	Y	3	1,2	UNKNOWN
chr1A	34921210	A	G	A	12	12,0	G	10	0,10	G	22	0,22	G	25	0,25	UNKNOWN
chr1A	34921854	G	A	G	32	32,0	A	11	0,11	A	10	0,10	A	23	0,23	UNKNOWN
chr1A	34981317	G	A	G	3	3,0	G	6	6,0	G	4	4,0	R	7	4,3	UNKNOWN
chr1A	34981405	T	A	T	10	10,0	W	7	5,2	T	1	1,0	T	22	22,0	UNKNOWN
chr1A	34984107	A	G	A	2	2,0	A	10	10,0	A	4	4,0	R	7	3,4	UNKNOWN
chr1A	34984165	A	G	N	.	.	A	11	11,0	R	6	5,1	R	10	4,6	UNKNOWN
chr1A	35281851	G	A	N	.	.	N	.	.	A	1	0,1	A	5	0,5	INTERGENIC
chr1A	35282128	T	C	Y	2	2,0	C	7	0,7	C	7	0,7	Y	15	4,11	INTERGENIC
chr1A	35282202	A	G	R	2	2,0	G	2	0,2	G	5	0,5	R	12	4,8	INTERGENIC
chr1A	35282467	G	A	N	.	.	N	.	.	G	1	1,0	R	7	4,3	INTERGENIC
chr1A	35282513	C	A	N	.	.	M	1	0,1	M	1	1,0	M	8	4,4	INTERGENIC
chr1A	35282632	T	C	N	.	.	C	3	0,3	Y	3	1,2	Y	11	6,5	INTERGENIC
chr1A	35283189	C	T	N	.	.	T	1	0,1	T	6	0,6	T	3	0,3	INTERGENIC
chr1A	35283206	A	G	N	.	.	G	1	0,1	G	5	0,5	G	3	0,3	INTERGENIC
chr1A	35283332	C	G	N	.	.	G	1	0,1	G	5	0,5	G	3	0,3	INTERGENIC
chr1A	35283364	G	A	N	.	.	A	1	0,1	A	5	0,5	A	3	0,3	INTERGENIC
chr1A	35283517	A	G	N	.	.	N	.	.	G	3	0,3	G	2	0,2	INTERGENIC
chr1A	35542828	C	T	N	.	.	T	3	0,3	T	9	0,9	Y	10	2,8	UTR_3_PRIME
chr1A	35542936	C	T	Y	3	1,2	C	5	5,0	C	13	13,0	C	23	23,0	SYNONYMOUS_CODING	tcG/tcA	TraesCS1A02G054000
chr1A	35543823	T	G	N	.	.	G	4	0,4	K	9	2,7	K	10	2,8	UTR_5_PRIME
chr1A	35932549	G	C	G	3	3,0	C	5	0,5	C	18	0,18	S	15	6,9	NON_SYNONYMOUS_CODING	Gtg/Ctg	TraesCS1A02G054300
chr1A	35933865	T	G	T	19	19,0	G	11	0,11	G	16	1,15	K	22	15,7	NON_SYNONYMOUS_CODING	agT/agG	TraesCS1A02G054300
chr1A	35934034	G	C	G	6	6,0	G	8	8,0	G	37	37,0	S	23	20,3	NON_SYNONYMOUS_CODING	Gtt/Ctt	TraesCS1A02G054300
chr1A	35934711	A	G	A	8	8,0	G	7	0,7	G	4	0,4	R	13	7,6	SYNONYMOUS_CODING	gaA/gaG	TraesCS1A02G054300
chr1A	35935092	T	C	T	20	20,0	C	13	0,13	Y	17	2,15	Y	34	19,15	SYNONYMOUS_CODING	gaT/gaC	TraesCS1A02G054300
chr1A	35938155	A	C	A	14	14,0	N	.	.	A	3	3,0	M	8	5,3	NON_SYNONYMOUS_CODING	cTg/cGg	TraesCS1A02G054400
chr1A	36267757	G	A	G	5	5,0	A	11	0,11	R	10	2,8	R	13	9,4	INTRON
chr1A	36268887	A	G	N	.	.	G	1	0,1	G	4	0,4	R	12	6,6	INTRON
chr1A	36274730	G	T	N	.	.	G	3	3,0	K	12	10,2	G	9	9,0	INTRON
chr1A	36274869	A	G	N	.	.	G	4	0,4	G	5	0,5	G	13	1,12	INTRON
chr1A	36274971	A	G	N	.	.	G	1	0,1	G	5	0,5	G	6	0,6	SPLICE_SITE_REGION
chr1A	36275757	G	A	N	.	.	A	1	0,1	A	1	0,1	A	3	0,3	INTRON
chr1A	36562581	C	G	N	.	.	N	.	.	G	4	0,4	G	4	0,4	INTRON
chr1A	36562753	A	G	N	.	.	G	1	0,1	G	6	0,6	G	2	0,2	INTRON
chr1A	36569865	T	C	T	1	1,0	N	.	.	T	6	6,0	Y	7	5,2	UTR_3_PRIME
chr1A	36595887	T	G	T	40	40,0	G	6	0,6	K	10	3,7	K	26	20,6	UNKNOWN
chr1A	36608677	T	C	T	1	1,0	T	3	3,0	N	.	.	Y	5	3,2	DOWNSTREAM
chr1A	36756937	C	T	N	.	.	C	1	1,0	C	1	1,0	Y	3	1,2	NON_SYNONYMOUS_CODING	gCg/gTg	TraesCS1A02G056105
chr1A	36765891	T	C	C	13	0,13	T	4	4,0	T	10	10,0	T	10	10,0	DOWNSTREAM
chr1A	36788020	T	C	N	.	.	C	2	0,2	C	3	0,3	C	3	0,3	INTERGENIC
chr1A	37482366	G	A	N	.	.	A	2	0,2	A	4	0,4	A	5	0,5	DOWNSTREAM
chr1A	37482447	C	T	T	2	0,2	T	2	0,2	T	10	0,10	T	7	0,7	DOWNSTREAM
chr1A	37483138	G	A	A	1	0,1	A	3	0,3	A	9	0,9	A	10	0,10	DOWNSTREAM
chr1A	37483199	G	A	A	1	0,1	A	4	0,4	A	9	0,9	A	8	0,8	DOWNSTREAM
chr1A	37483595	G	A	N	.	.	A	3	0,3	A	5	0,5	A	4	0,4	DOWNSTREAM
chr1A	37483850	C	A	A	4	0,4	A	5	0,5	A	7	0,7	A	19	0,19	DOWNSTREAM
chr1A	37484699	G	T	T	2	0,2	T	4	0,4	T	10	0,10	T	5	0,5	DOWNSTREAM
chr1A	37485691	A	G	G	2	0,2	G	6	1,5	G	7	0,7	G	5	0,5	DOWNSTREAM
chr1A	37486315	A	G	G	1	0,1	G	3	0,3	G	10	0,10	G	7	1,6	DOWNSTREAM
chr1A	37487162	G	A	A	7	0,7	A	5	0,5	A	10	0,10	A	2	0,2	INTERGENIC
chr1A	37487374	A	G	G	7	0,7	G	15	0,15	G	24	0,24	G	27	0,27	INTERGENIC
chr1A	37487467	T	A	A	1	0,1	A	5	0,5	A	9	0,9	A	13	0,13	INTERGENIC
chr1A	37488611	T	C	N	.	.	C	14	0,14	C	3	0,3	C	11	0,11	INTERGENIC
chr1A	37500428	T	A	N	.	.	A	2	0,2	A	3	0,3	W	4	3,1	DOWNSTREAM
chr1A	37500841	C	T	C	3	3,0	T	2	0,2	N	.	.	Y	2	1,1	DOWNSTREAM
chr1A	37501939	T	C	T	1	1,0	T	4	4,0	T	2	2,0	Y	11	5,6	DOWNSTREAM
chr1A	37503077	T	C	N	.	.	N	.	.	N	.	.	C	5	0,5	NON_SYNONYMOUS_CODING	gAa/gGa	TraesCS1A02G057300
chr1A	37504263	G	A	R	1	1,0	A	2	0,2	A	5	0,5	R	11	8,3	NON_SYNONYMOUS_CODING	Cac/Tac	TraesCS1A02G057300
chr1A	38321960	C	T	N	.	.	T	4	0,4	T	3	0,3	Y	12	5,7	INTERGENIC
chr1A	38322027	G	A	G	3	3,0	A	10	0,10	A	9	0,9	R	20	5,15	INTERGENIC
chr1A	38322428	C	G	G	3	0,3	G	11	0,11	G	6	0,6	G	17	0,17	INTERGENIC
chr1A	38322759	A	G	G	4	0,4	G	14	0,14	G	13	0,13	G	21	0,21	INTERGENIC
chr1A	38718101	C	T	T	5	0,5	C	8	8,0	C	11	11,0	Y	19	12,7	UTR_3_PRIME
chr1A	38718126	G	C	C	5	0,5	G	9	9,0	G	13	13,0	G	26	26,0	NON_SYNONYMOUS_CODING	Ccg/Gcg	TraesCS1A02G058300
chr1A	38718616	T	C	C	10	0,10	T	15	15,0	Y	15	14,1	Y	30	21,9	SYNONYMOUS_CODING	gcA/gcG	TraesCS1A02G058300
chr1A	38730540	G	A	A	16	0,16	G	17	17,0	R	22	18,4	R	26	19,7	INTRON
chr1A	38731037	G	A	A	3	0,3	G	3	3,0	G	1	1,0	G	7	7,0	INTRON
chr1A	38733516	A	G	A	4	4,0	A	2	2,0	A	12	12,0	R	9	4,5	UPSTREAM
chr1A	39781159	A	G	N	.	.	N	.	.	G	1	0,1	G	3	0,3	INTERGENIC
chr1A	39871016	T	G	G	6	0,6	T	3	3,0	K	10	8,2	K	2	1,1	SYNONYMOUS_CODING	gcA/gcC	TraesCS1A02G059100
chr1A	39871198	T	C	C	8	0,8	T	2	2,0	Y	9	7,2	Y	8	5,3	NON_SYNONYMOUS_CODING	Act/Gct	TraesCS1A02G059100
chr1A	39871283	T	A	A	7	0,7	N	.	.	W	7	5,2	W	8	5,3	SYNONYMOUS_CODING	gcA/gcT	TraesCS1A02G059100
chr1A	39871352	A	G	G	6	0,6	N	.	.	R	4	3,1	R	3	1,2	SYNONYMOUS_CODING	taT/taC	TraesCS1A02G059100
chr1A	39893178	C	G	G	11	0,11	C	5	5,0	C	11	11,0	C	9	9,0	NON_SYNONYMOUS_CODING	Gga/Cga	TraesCS1A02G059200
chr1A	41018138	C	T	Y	1	0,1	N	.	.	C	7	7,0	Y	4	3,1	UNKNOWN
chr1A	41018149	A	G	R	1	0,1	N	.	.	A	8	8,0	R	4	3,1	UNKNOWN
chr1A	41052224	C	A	N	.	.	C	7	7,0	C	14	14,0	M	9	7,2	UNKNOWN
chr1A	41053177	A	T	T	5	0,5	A	4	4,0	A	30	30,0	A	23	22,1	UNKNOWN
chr1A	41053221	T	C	Y	2	0,2	T	5	5,0	T	31	31,0	T	26	25,1	UNKNOWN
chr1A	41053316	C	T	Y	7	2,5	C	6	6,0	C	36	36,0	C	35	33,2	UNKNOWN
chr1A	41053519	A	G	G	5	0,5	N	.	.	A	19	19,0	R	21	17,4	UNKNOWN
chr1A	41053773	C	T	N	.	.	Y	4	2,2	C	34	34,0	C	18	18,0	UNKNOWN
chr1A	41053996	C	T	N	.	.	C	3	3,0	C	24	24,0	Y	22	17,5	UNKNOWN
chr1A	41054033	T	C	N	.	.	T	3	3,0	T	25	25,0	Y	20	15,5	UNKNOWN
chr1A	41054205	C	T	N	.	.	C	4	4,0	C	47	47,0	Y	29	25,4	UNKNOWN
chr1A	41054418	A	G	G	2	0,2	N	.	.	A	3	3,0	R	6	5,1	UNKNOWN
chr1A	41054507	A	T	W	2	0,2	A	3	3,0	A	38	38,0	A	26	25,1	UNKNOWN
chr1A	41709933	T	C	T	3	3,0	T	7	7,0	T	3	3,0	Y	7	5,2	UPSTREAM
chr1A	41710764	C	T	N	.	.	C	3	3,0	C	1	1,0	Y	10	8,2	UPSTREAM
chr1A	41711615	T	C	N	.	.	T	2	2,0	T	2	2,0	Y	6	4,2	UPSTREAM
chr1A	41712759	T	C	T	1	1,0	N	.	.	T	1	1,0	Y	8	6,2	NON_SYNONYMOUS_CODING	Tgc/Cgc	TraesCS1A02G060500
chr1A	41712954	A	G	N	.	.	N	.	.	N	.	.	R	6	1,5	NON_SYNONYMOUS_CODING	Atc/Gtc	TraesCS1A02G060500
chr1A	41712983	G	A	N	.	.	N	.	.	N	.	.	R	6	1,5	SYNONYMOUS_CODING	cgG/cgA	TraesCS1A02G060500
chr1A	41713628	C	G	N	.	.	C	2	2,0	S	11	1,10	S	12	4,8	NON_SYNONYMOUS_CODING	atC/atG	TraesCS1A02G060500
chr1A	41716556	T	C	T	1	1,0	T	9	9,0	T	7	7,0	Y	18	12,6	DOWNSTREAM
chr1A	41717592	T	C	C	1	0,1	C	5	0,5	C	4	0,4	C	2	0,2	DOWNSTREAM
chr1A	41718837	G	T	G	2	2,0	K	4	3,1	G	10	10,0	G	11	11,0	DOWNSTREAM
chr1A	41719006	T	A	N	.	.	T	6	6,0	W	5	3,2	T	11	11,0	DOWNSTREAM
chr1A	41748337	A	G	A	5	5,0	A	6	6,0	R	16	13,3	A	8	8,0	NON_SYNONYMOUS_CODING	cAa/cGa	TraesCS1A02G060700
chr1A	41748392	T	C	T	3	3,0	T	8	8,0	T	11	11,0	Y	11	5,6	SYNONYMOUS_CODING	gaT/gaC	TraesCS1A02G060700
chr1A	41749531	C	G	C	7	7,0	C	9	9,0	C	11	10,1	S	15	7,8	NON_SYNONYMOUS_CODING	Caa/Gaa	TraesCS1A02G060700
chr1A	42198956	T	A	N	.	.	N	.	.	A	3	0,3	A	3	0,3	INTERGENIC
chr1A	42199022	G	A	N	.	.	N	.	.	A	5	0,5	A	2	0,2	INTERGENIC
chr1A	42251597	G	C	N	.	.	C	2	0,2	C	7	0,7	C	12	0,12	UPSTREAM
chr1A	42252991	G	A	R	6	3,3	G	16	16,0	G	19	19,0	G	33	33,0	INTRON
chr1A	42253004	G	A	A	3	0,3	G	21	21,0	G	12	12,0	G	25	25,0	INTRON
chr1A	42253060	G	A	A	3	0,3	A	16	0,16	A	19	0,19	A	25	0,25	INTRON
chr1A	42253189	G	C	C	6	0,6	G	17	17,0	G	17	17,0	S	20	17,3	INTRON
chr1A	42253306	A	G	A	7	7,0	G	8	0,8	R	6	1,5	R	16	3,13	INTRON
chr1A	42253476	A	G	N	.	.	N	.	.	G	4	0,4	G	4	0,4	INTRON
chr1A	42253497	G	A	G	2	2,0	N	.	.	R	4	3,1	R	5	3,2	INTRON
chr1A	42253599	A	G	A	3	3,0	N	.	.	A	4	4,0	R	3	2,1	INTRON
chr1A	42253789	T	C	C	3	0,3	N	.	.	C	1	0,1	C	1	0,1	INTRON
chr1A	42254080	A	G	R	1	0,1	N	.	.	A	1	1,0	R	7	4,3	INTRON
chr1A	42254465	T	C	T	14	14,0	C	8	0,8	Y	15	11,4	Y	26	8,18	INTRON
chr1A	42254478	A	G	A	16	16,0	G	10	0,10	R	17	12,5	R	32	11,21	INTRON
chr1A	42255232	A	G	A	4	4,0	G	5	0,5	R	10	2,8	R	21	10,11	INTRON
chr1A	42255250	A	T	A	3	3,0	T	4	0,4	W	10	2,8	W	19	8,11	INTRON
chr1A	42255431	C	A	C	5	5,0	C	4	4,0	M	19	13,6	C	45	45,0	NON_SYNONYMOUS_CODING	gCc/gAc	TraesCS1A02G061700
chr1A	42255510	C	T	C	18	18,0	T	7	0,7	Y	16	12,4	Y	30	21,9	SYNONYMOUS_CODING	ctC/ctT	TraesCS1A02G061700
chr1A	42255537	C	A	C	23	23,0	A	7	0,7	M	16	12,4	M	41	32,9	SYNONYMOUS_CODING	gtC/gtA	TraesCS1A02G061700
chr1A	42255627	A	G	G	30	0,30	G	1	0,1	G	16	0,16	G	39	0,39	SYNONYMOUS_CODING	caA/caG	TraesCS1A02G061700
chr1A	42256090	A	G	G	33	0,33	N	.	.	G	8	0,8	G	41	0,41	NON_SYNONYMOUS_CODING	Aag/Gag	TraesCS1A02G061700
chr1A	42256125	A	G	G	23	0,23	N	.	.	G	3	0,3	G	20	0,20	SYNONYMOUS_CODING	acA/acG	TraesCS1A02G061700
chr1A	42256183	G	A	G	9	9,0	A	10	0,10	A	1	0,1	R	11	7,4	NON_SYNONYMOUS_CODING	Gac/Aac	TraesCS1A02G061700
chr1A	42256207	G	A	G	3	3,0	A	11	0,11	A	1	0,1	R	9	4,5	NON_SYNONYMOUS_CODING	Gaa/Aaa	TraesCS1A02G061700
chr1A	42256287	G	C	N	.	.	G	13	13,0	G	2	2,0	S	9	6,3	UTR_3_PRIME
chr1A	42256349	A	G	N	.	.	G	8	0,8	G	2	0,2	G	5	0,5	UTR_3_PRIME
chr1A	42439661	C	T	C	1	1,0	C	6	6,0	C	1	1,0	Y	9	7,2	UNKNOWN
chr1A	42439792	A	G	R	1	1,0	G	12	0,12	R	5	2,3	R	9	5,4	UNKNOWN
chr1A	42439913	G	A	A	2	0,2	A	10	0,10	A	5	0,5	A	8	0,8	UNKNOWN
chr1A	42439929	C	G	C	2	2,0	G	10	0,10	S	5	2,3	S	6	4,2	UNKNOWN
chr1A	42440119	G	A	R	2	2,0	A	6	0,6	A	1	0,1	R	6	2,4	UNKNOWN
chr1A	42440188	G	T	N	.	.	T	4	0,4	T	3	0,3	T	5	0,5	UNKNOWN
chr1A	42477118	C	T	N	.	.	T	1	0,1	T	3	0,3	T	2	0,2	DOWNSTREAM
chr1A	42479002	A	G	N	.	.	G	2	0,2	G	1	0,1	G	2	0,2	DOWNSTREAM
chr1A	42507539	G	A	A	2	0,2	A	4	0,4	A	4	0,4	A	15	0,15	UPSTREAM
chr1A	42507711	T	G	G	4	0,4	G	7	0,7	G	6	0,6	G	12	0,12	UPSTREAM
chr1A	42508842	T	A	T	1	1,0	T	8	8,0	T	2	2,0	W	17	14,3	UPSTREAM
chr1A	42509116	A	G	G	1	0,1	G	3	0,3	G	1	0,1	G	4	0,4	UPSTREAM
chr1A	42509499	A	T	A	1	1,0	A	9	9,0	A	4	4,0	W	14	8,6	UPSTREAM
chr1A	42509512	T	A	A	1	0,1	A	9	0,9	A	4	0,4	A	15	0,15	UPSTREAM
chr1A	42509841	A	G	G	2	0,2	N	.	.	G	1	0,1	G	2	0,2	UPSTREAM
chr1A	42510034	A	G	G	12	0,12	G	9	0,9	G	13	0,13	G	8	0,8	UPSTREAM
chr1A	42510337	C	T	T	6	0,6	T	11	0,11	T	8	0,8	T	12	0,12	UNKNOWN
chr1A	42510446	G	A	A	5	0,5	A	4	0,4	A	4	0,4	A	7	0,7	UNKNOWN
chr1A	42510478	T	C	C	14	0,14	C	12	0,12	C	10	0,10	C	13	0,13	UNKNOWN
chr1A	42510717	T	C	T	7	7,0	T	6	6,0	Y	4	1,3	Y	14	9,5	UNKNOWN
chr1A	42510929	G	A	G	1	1,0	N	.	.	R	4	2,2	R	3	2,1	UNKNOWN
chr1A	42511142	A	T	T	1	0,1	T	1	0,1	T	2	0,2	T	3	0,3	UNKNOWN
chr1A	42511615	G	A	A	4	0,4	A	3	0,3	A	7	0,7	A	7	0,7	UNKNOWN
chr1A	42549123	T	C	C	8	0,8	C	17	0,17	C	20	0,20	C	18	0,18	INTRON
chr1A	42549297	C	T	T	7	0,7	T	17	0,17	T	26	2,24	Y	31	11,20	INTRON
chr1A	42549424	T	G	G	5	0,5	G	11	0,11	G	14	0,14	K	30	5,25	INTRON
chr1A	42549481	T	C	T	5	5,0	C	18	0,18	C	21	0,21	Y	34	5,29	INTRON
chr1A	42643268	G	A	N	.	.	A	13	0,13	A	4	0,4	A	11	0,11	UTR_5_PRIME
chr1A	42644517	A	G	G	3	0,3	A	6	6,0	A	5	5,0	A	8	8,0	NON_SYNONYMOUS_CODING	gAt/gGt	TraesCS1A02G062400
chr1A	42667935	G	T	G	1	1,0	G	2	2,0	K	4	2,2	G	15	15,0	NON_SYNONYMOUS_CODING	tGt/tTt	TraesCS1A02G062400
chr1A	42668144	T	C	N	.	.	C	4	0,4	C	4	0,4	C	9	0,9	SYNONYMOUS_CODING	atT/atC	TraesCS1A02G062400
chr1A	44327218	C	T	T	6	0,6	T	15	0,15	T	4	0,4	T	4	0,4	UNKNOWN
chr1A	44328758	C	T	T	1	0,1	T	5	0,5	T	1	0,1	T	4	0,4	UNKNOWN
chr1A	44328894	A	T	T	2	0,2	T	1	0,1	T	1	0,1	T	3	0,3	UNKNOWN
chr1A	44330068	T	G	N	.	.	G	3	0,3	N	.	.	G	5	0,5	UNKNOWN
chr1A	44330509	A	G	G	5	0,5	G	6	0,6	G	7	0,7	G	5	0,5	UNKNOWN
chr1A	44330725	G	A	A	6	0,6	A	7	0,7	A	9	0,9	A	7	0,7	UNKNOWN
chr1A	44357454	C	T	N	.	.	T	3	0,3	T	4	0,4	T	3	0,3	UNKNOWN
chr1A	44358994	C	T	T	10	0,10	T	10	0,10	T	2	0,2	T	9	0,9	DOWNSTREAM
chr1A	44359130	A	T	N	.	.	T	1	0,1	T	4	0,4	T	4	0,4	DOWNSTREAM
chr1A	44359348	C	G	G	2	0,2	G	14	0,14	G	8	0,8	G	35	0,35	DOWNSTREAM
chr1A	44359503	G	A	A	1	0,1	A	8	0,8	A	9	0,9	A	5	0,5	DOWNSTREAM
chr1A	44360143	T	G	N	.	.	G	2	0,2	N	.	.	G	3	0,3	DOWNSTREAM
chr1A	44360799	G	A	A	1	0,1	A	4	0,4	A	2	0,2	A	2	0,2	DOWNSTREAM
chr1A	44365280	G	A	N	.	.	A	1	0,1	A	4	0,4	R	4	3,1	SYNONYMOUS_CODING	atC/atT	TraesCS1A02G063300
chr1A	44365410	G	T	N	.	.	K	4	1,3	K	3	2,1	K	4	3,1	NON_SYNONYMOUS_CODING	tCc/tAc	TraesCS1A02G063300
chr1A	44366757	A	G	N	.	.	G	2	0,2	N	.	.	G	2	0,2	INTRON
chr1A	44367021	C	T	N	.	.	T	4	0,4	N	.	.	Y	4	3,1	UTR_5_PRIME
chr1A	44406997	T	C	C	2	0,2	C	13	0,13	C	24	0,24	C	32	0,32	NON_SYNONYMOUS_CODING	gAa/gGa	TraesCS1A02G063500
chr1A	44407666	C	A	A	2	0,2	A	17	0,17	A	14	0,14	A	34	0,34	SYNONYMOUS_CODING	gtG/gtT	TraesCS1A02G063500
chr1A	44409506	A	C	A	2	2,0	N	.	.	A	3	3,0	M	5	3,2	NON_SYNONYMOUS_CODING	gAt/gCt	TraesCS1A02G063600
chr1A	44411432	G	A	A	2	0,2	A	4	0,4	A	4	0,4	A	9	0,9	NON_SYNONYMOUS_CODING	atG/atA	TraesCS1A02G063600
chr1A	44980395	C	T	N	.	.	N	.	.	T	3	0,3	T	3	0,3	UNKNOWN
chr1A	44980453	G	A	N	.	.	A	1	0,1	A	2	0,2	A	3	0,3	UNKNOWN
chr1A	45543878	C	T	T	4	0,4	T	6	0,6	T	3	0,3	T	9	0,9	INTRON
chr1A	45544301	C	T	C	4	4,0	C	1	1,0	C	5	5,0	Y	6	4,2	INTRON
chr1A	45544511	T	A	W	1	0,1	T	3	3,0	T	7	7,0	T	7	7,0	INTRON
chr1A	45544909	A	C	C	3	0,3	C	3	0,3	C	5	0,5	C	5	0,5	INTRON
chr1A	45544937	A	C	C	3	0,3	C	4	0,4	C	6	0,6	C	7	0,7	INTRON
chr1A	45545505	A	G	G	3	0,3	G	3	0,3	G	8	0,8	G	4	0,4	INTRON
chr1A	45545543	T	C	C	5	0,5	C	3	0,3	C	8	0,8	C	4	0,4	INTRON
chr1A	45546024	T	C	C	5	0,5	C	3	0,3	C	4	0,4	C	6	0,6	INTRON
chr1A	45546713	G	T	N	.	.	G	3	3,0	G	3	3,0	K	9	7,2	SPLICE_SITE_DONOR
chr1A	45546869	C	G	C	8	8,0	C	9	9,0	S	19	17,2	S	33	26,7	INTRON
chr1A	45546943	A	G	G	9	0,9	G	6	0,6	G	19	0,19	G	34	0,34	INTRON
chr1A	45793719	A	G	R	1	1,0	G	5	0,5	G	3	0,3	R	11	4,7	UTR_5_PRIME
chr1A	45794054	C	A	A	4	0,4	C	3	3,0	C	10	10,0	C	22	22,0	START_GAINED
chr1A	45794124	T	C	C	4	0,4	T	6	6,0	T	14	14,0	T	19	19,0	UTR_5_PRIME
chr1A	45794194	T	C	C	8	0,8	C	9	0,9	C	18	0,18	C	36	0,36	UTR_5_PRIME
chr1A	45797171	C	T	C	18	18,0	T	15	0,15	Y	26	6,20	Y	29	16,13	SYNONYMOUS_CODING	gaC/gaT	TraesCS1A02G064100
chr1A	45797676	C	G	G	4	0,4	C	4	4,0	C	5	5,0	C	7	7,0	UTR_3_PRIME
chr1A	46234622	G	T	G	13	13,0	G	2	2,0	G	1	1,0	K	3	1,2	UNKNOWN
chr1A	46235206	C	T	Y	2	2,0	N	.	.	T	1	0,1	T	7	0,7	UNKNOWN
chr1A	46235367	C	T	N	.	.	N	.	.	T	1	0,1	T	3	0,3	UNKNOWN
chr1A	46235571	G	A	G	12	12,0	A	23	0,23	A	14	0,14	A	17	0,17	UNKNOWN
chr1A	46235884	A	G	A	18	18,0	G	14	0,14	R	20	6,14	R	18	4,14	UNKNOWN
chr1A	46235893	G	T	T	16	0,16	G	6	6,0	G	19	19,0	G	17	17,0	UNKNOWN
chr1A	46236036	C	G	G	22	0,22	G	8	0,8	G	9	0,9	G	10	0,10	UNKNOWN
chr1A	46236072	T	C	T	19	19,0	C	8	0,8	C	13	0,13	C	13	0,13	UNKNOWN
chr1A	46236222	G	T	G	12	12,0	G	14	14,0	K	13	11,2	K	19	14,5	UNKNOWN
chr1A	46236653	G	A	G	8	8,0	A	3	0,3	A	2	0,2	R	11	4,7	UNKNOWN
chr1A	46236677	T	G	T	7	7,0	G	1	0,1	G	1	0,1	K	15	7,8	UNKNOWN
chr1A	46236732	A	G	G	6	0,6	N	.	.	G	4	0,4	G	12	0,12	UNKNOWN
chr1A	46236957	C	T	Y	2	0,2	C	6	6,0	C	10	10,0	C	22	22,0	UNKNOWN
chr1A	46236976	C	A	C	2	2,0	A	6	0,6	M	10	1,9	M	22	6,16	UNKNOWN
chr1A	46237179	G	A	G	7	7,0	A	4	0,4	A	4	0,4	A	8	0,8	UNKNOWN
chr1A	46237316	T	C	C	13	0,13	C	6	0,6	C	14	0,14	C	21	0,21	UNKNOWN
chr1A	46238327	T	G	G	6	0,6	G	4	0,4	N	.	.	G	7	0,7	UNKNOWN
chr1A	46239036	G	A	G	14	14,0	A	2	0,2	A	3	0,3	R	15	9,6	UNKNOWN
chr1A	46239113	G	T	G	20	20,0	N	.	.	N	.	.	T	8	0,8	UNKNOWN
chr1A	46239159	T	C	T	25	25,0	C	7	0,7	C	1	0,1	C	9	0,9	UNKNOWN
chr1A	46239741	A	G	G	15	0,15	G	14	0,14	G	14	0,14	G	20	0,20	UNKNOWN
chr1A	47203313	A	G	A	2	2,0	N	.	.	A	8	8,0	R	3	1,2	NON_SYNONYMOUS_CODING	Tcc/Ccc	TraesCS1A02G064900
chr1A	47207141	T	G	N	.	.	N	.	.	G	1	0,1	G	3	0,3	INTRON
chr1A	47208113	T	C	N	.	.	T	1	1,0	T	5	5,0	Y	2	1,1	UPSTREAM
chr1A	47209384	C	T	N	.	.	N	.	.	T	1	0,1	Y	3	1,2	DOWNSTREAM
chr1A	47209681	T	G	T	4	4,0	T	3	3,0	T	2	2,0	K	5	1,4	DOWNSTREAM
chr1A	47210491	A	G	N	.	.	G	2	0,2	G	1	0,1	G	4	0,4	SYNONYMOUS_CODING	tcT/tcC	TraesCS1A02G065000
chr1A	47213286	C	T	C	4	4,0	T	6	0,6	T	10	0,10	Y	4	3,1	UPSTREAM
chr1A	47213547	T	C	T	2	2,0	Y	10	8,2	T	7	7,0	T	7	7,0	UPSTREAM
chr1A	47214225	C	G	N	.	.	G	4	0,4	S	5	4,1	S	12	2,10	UPSTREAM
chr1A	47214437	T	C	Y	4	1,3	T	2	2,0	T	5	5,0	T	11	11,0	UPSTREAM
chr1A	47374469	G	A	N	.	.	N	.	.	A	2	0,2	A	3	0,3	DOWNSTREAM
chr1A	47376401	C	G	S	1	1,0	G	2	0,2	G	4	0,4	G	10	0,10	DOWNSTREAM
chr1A	47376440	T	A	T	2	2,0	T	2	2,0	W	3	2,1	T	13	13,0	DOWNSTREAM
chr1A	47376571	C	G	C	4	4,0	C	2	2,0	C	3	3,0	S	14	10,4	DOWNSTREAM
chr1A	47378122	C	G	N	.	.	S	1	1,0	S	1	0,1	S	8	4,4	UPSTREAM
chr1A	47378169	T	G	N	.	.	T	1	1,0	T	1	1,0	K	6	4,2	UPSTREAM
chr1A	47579583	G	A	R	1	1,0	A	2	0,2	A	3	0,3	G	8	8,0	INTRON
chr1A	47581359	T	A	T	8	8,0	A	4	0,4	A	24	0,24	A	19	0,19	INTRON
chr1A	47582281	C	G	C	9	9,0	G	2	0,2	G	24	0,24	S	20	9,11	INTRON
chr1A	47584021	G	T	K	2	2,0	N	.	.	T	5	0,5	T	7	0,7	INTRON
chr1A	47584031	A	G	A	2	2,0	N	.	.	G	5	0,5	R	7	3,4	INTRON
chr1A	47584579	T	C	N	.	.	N	.	.	C	2	0,2	C	5	0,5	INTRON
chr1A	47585664	T	G	K	1	1,0	G	1	0,1	G	7	0,7	G	10	0,10	INTRON
chr1A	47586167	C	T	C	1	1,0	C	1	1,0	C	1	1,0	Y	5	3,2	SPLICE_SITE_REGION
chr1A	47586203	A	G	R	1	1,0	N	.	.	G	1	0,1	R	3	1,2	INTRON
chr1A	47728082	C	T	C	3	3,0	C	3	3,0	C	5	5,0	Y	35	14,21	UNKNOWN
chr1A	47728224	G	A	G	4	4,0	A	2	0,2	R	8	3,5	R	33	28,5	UNKNOWN
chr1A	47729815	C	T	T	4	0,4	C	2	2,0	C	4	4,0	C	12	12,0	UNKNOWN
chr1A	47730011	G	T	N	.	.	T	1	0,1	T	3	0,3	T	7	0,7	UNKNOWN
chr1A	47730481	T	C	T	4	4,0	C	1	0,1	Y	8	1,7	Y	4	3,1	UNKNOWN
chr1A	47730639	C	T	C	8	8,0	C	5	5,0	Y	6	5,1	Y	8	5,3	UNKNOWN
chr1A	47730742	C	T	C	7	7,0	T	6	0,6	Y	5	4,1	Y	17	4,13	UNKNOWN
chr1A	47730798	C	T	C	6	6,0	T	7	0,7	T	7	0,7	T	17	0,17	UNKNOWN
chr1A	47731212	G	A	G	3	3,0	A	3	0,3	A	10	0,10	R	17	7,10	UNKNOWN
chr1A	47731538	G	A	R	1	1,0	A	2	0,2	R	5	2,3	R	8	2,6	UNKNOWN
chr1A	47732029	G	A	G	14	14,0	A	19	1,18	R	6	2,4	R	20	8,12	UNKNOWN
chr1A	47732283	A	G	R	13	10,3	A	15	15,0	A	12	12,0	A	44	44,0	UNKNOWN
chr1A	47732446	T	A	T	4	4,0	T	7	7,0	W	8	5,3	W	29	18,11	UNKNOWN
chr1A	47732582	A	T	A	5	5,0	A	3	3,0	A	4	4,0	W	10	6,4	UNKNOWN
chr1A	47732606	A	G	A	6	6,0	G	3	0,3	G	4	0,4	G	10	0,10	UNKNOWN
chr1A	47732824	C	T	C	4	4,0	C	2	2,0	N	.	.	Y	8	3,5	UNKNOWN
chr1A	47732860	C	T	C	4	4,0	T	1	0,1	N	.	.	Y	9	5,4	UNKNOWN
chr1A	47803457	T	G	N	.	.	T	4	4,0	T	10	10,0	K	10	8,2	NON_SYNONYMOUS_CODING	aTc/aGc	TraesCS1A02G065400
chr1A	47805224	C	T	C	5	5,0	C	1	1,0	C	3	3,0	Y	7	5,2	SYNONYMOUS_CODING	ggC/ggT	TraesCS1A02G065400
chr1A	47805278	C	T	C	5	5,0	T	1	0,1	T	5	0,5	Y	5	2,3	SYNONYMOUS_CODING	atC/atT	TraesCS1A02G065400
chr1A	47806133	G	A	G	5	5,0	G	5	5,0	G	11	11,0	R	14	11,3	NON_SYNONYMOUS_CODING	tCc/tTc	TraesCS1A02G065500
chr1A	47827772	C	A	C	1	1,0	N	.	.	N	.	.	M	5	3,2	UTR_5_PRIME
chr1A	48576053	G	A	G	3	3,0	G	23	23,0	G	6	6,0	R	8	6,2	UTR_5_PRIME
chr1A	48576274	C	T	Y	1	1,0	T	5	0,5	T	2	0,2	Y	4	2,2	INTRON
chr1A	48576505	T	G	T	3	3,0	N	.	.	G	3	0,3	G	8	0,8	INTRON
chr1A	48579163	C	T	N	.	.	T	2	0,2	T	1	0,1	Y	6	2,4	INTRON
chr1A	48580169	C	T	C	5	5,0	T	3	0,3	T	9	0,9	T	11	0,11	INTRON
chr1A	48580387	A	G	A	4	4,0	G	11	0,11	G	3	0,3	R	10	2,8	INTRON
chr1A	48580553	C	T	C	5	5,0	T	11	0,11	Y	11	1,10	Y	23	15,8	INTRON
chr1A	48583200	T	C	N	.	.	N	.	.	C	3	0,3	C	6	0,6	INTRON
chr1A	48585841	T	C	Y	2	2,0	C	7	0,7	C	16	0,16	C	8	0,8	INTRON
chr1A	48586091	G	A	G	4	4,0	R	2	1,1	G	5	5,0	G	18	18,0	INTRON
chr1A	48586204	C	T	C	7	7,0	C	2	2,0	C	6	6,0	Y	15	8,7	INTRON
chr1A	48586603	A	G	A	7	7,0	A	3	3,0	A	9	9,0	R	6	4,2	INTRON
chr1A	48586747	G	A	G	5	5,0	A	3	0,3	A	9	0,9	R	7	2,5	INTRON
chr1A	48588824	T	G	K	1	0,1	T	13	13,0	T	13	13,0	T	13	13,0	INTRON
chr1A	48590006	T	A	T	3	3,0	A	6	0,6	A	4	0,4	W	4	2,2	INTRON
chr1A	48590080	T	A	T	3	3,0	A	4	0,4	A	7	0,7	W	5	1,4	INTRON
chr1A	48590268	T	C	T	5	5,0	C	5	0,5	C	4	0,4	Y	5	1,4	INTRON
chr1A	48590419	C	G	C	7	7,0	C	8	8,0	S	13	11,2	S	17	12,5	INTRON
chr1A	48590446	C	T	C	7	7,0	C	8	8,0	Y	15	13,2	Y	15	10,5	INTRON
chr1A	48593278	C	A	C	3	3,0	N	.	.	C	3	3,0	M	3	1,2	INTRON
chr1A	48593321	G	A	G	3	3,0	N	.	.	A	3	0,3	R	3	2,1	INTRON
chr1A	48979726	C	T	Y	1	1,0	T	4	0,4	T	2	0,2	Y	4	2,2	NON_SYNONYMOUS_CODING	gCg/gTg	TraesCS1A02G066400
chr1A	48995576	G	C	C	24	0,24	N	.	.	C	2	0,2	C	1	0,1	INTRON
chr1A	48996898	C	T	C	7	7,0	T	5	0,5	T	1	0,1	Y	4	3,1	INTRON
chr1A	48997273	G	T	G	37	37,0	T	5	0,5	K	16	6,10	K	15	3,12	INTRON
chr1A	48997344	T	C	C	33	0,33	C	4	0,4	C	13	0,13	C	11	0,11	INTRON
chr1A	49000824	G	A	N	.	.	A	6	0,6	A	2	0,2	A	2	0,2	UPSTREAM
chr1A	49001457	A	G	A	5	5,0	N	.	.	A	1	1,0	R	5	1,4	UPSTREAM
chr1A	49002990	T	C	N	.	.	C	9	0,9	C	10	0,10	C	5	0,5	UPSTREAM
chr1A	49002999	A	T	N	.	.	T	9	0,9	T	9	0,9	T	5	0,5	UPSTREAM
chr1A	49003536	G	A	N	.	.	A	8	0,8	A	7	0,7	A	6	0,6	UPSTREAM
chr1A	49003810	T	C	Y	2	2,0	C	1	0,1	C	10	0,10	C	8	0,8	UPSTREAM
chr1A	49004219	G	T	K	10	8,2	N	.	.	G	12	12,0	G	4	4,0	UPSTREAM
chr1A	49098763	C	T	C	3	3,0	T	7	0,7	T	21	0,21	T	13	0,13	SYNONYMOUS_CODING	gcC/gcT	TraesCS1A02G066700
chr1A	49100113	T	G	N	.	.	G	2	0,2	G	3	0,3	K	3	2,1	INTRON
chr1A	49150747	G	A	N	.	.	A	5	0,5	R	9	2,7	R	12	5,7	INTRON
chr1A	49151612	G	T	G	4	4,0	T	20	0,20	T	14	0,14	K	54	15,39	INTRON
chr1A	49151959	A	C	N	.	.	M	6	4,2	A	6	6,0	A	9	9,0	INTRON
chr1A	49152375	C	T	C	4	4,0	T	17	0,17	Y	16	2,14	Y	35	13,22	INTRON
chr1A	49152623	T	C	T	7	7,0	C	18	0,18	Y	27	3,24	Y	44	12,32	INTRON
chr1A	49236031	T	C	N	.	.	C	1	0,1	C	5	0,5	C	1	0,1	INTERGENIC
chr1A	49236554	G	A	G	8	8,0	N	.	.	R	5	3,2	R	6	4,2	INTERGENIC
chr1A	49236716	A	G	A	8	8,0	G	4	0,4	R	7	3,4	R	12	9,3	INTERGENIC
chr1A	49236793	C	T	C	11	11,0	T	8	0,8	Y	11	4,7	Y	13	9,4	INTERGENIC
chr1A	49236851	G	A	G	5	5,0	A	10	0,10	R	9	3,6	R	6	5,1	INTERGENIC
chr1A	49237169	G	C	N	.	.	C	9	0,9	S	8	1,7	S	5	3,2	INTERGENIC
chr1A	49237340	A	G	A	4	4,0	G	3	0,3	G	14	0,14	R	5	1,4	INTERGENIC
chr1A	49237853	C	T	C	6	6,0	T	6	0,6	Y	25	5,20	Y	3	1,2	INTERGENIC
chr1A	49238193	G	A	R	1	1,0	A	1	0,1	A	3	0,3	R	4	2,2	INTERGENIC
chr1A	49238305	A	G	A	5	5,0	G	3	0,3	G	5	0,5	R	5	2,3	INTERGENIC
chr1A	49239455	G	C	G	2	2,0	N	.	.	S	3	2,1	S	5	4,1	INTERGENIC
chr1A	49239494	T	A	T	2	2,0	N	.	.	W	3	2,1	W	5	4,1	INTERGENIC
chr1A	49251525	C	G	N	.	.	G	4	0,4	C	1	1,0	S	12	7,5	UTR_3_PRIME
chr1A	49251849	G	A	G	13	13,0	A	2	0,2	A	26	2,24	R	9	5,4	NON_SYNONYMOUS_CODING	cCa/cTa	TraesCS1A02G067200
chr1A	49252694	G	C	G	5	5,0	C	2	0,2	C	9	0,9	S	28	10,18	SYNONYMOUS_CODING	gcC/gcG	TraesCS1A02G067200
chr1A	49252709	C	A	C	5	5,0	C	2	2,0	M	9	7,2	C	30	30,0	NON_SYNONYMOUS_CODING	ttG/ttT	TraesCS1A02G067200
chr1A	49252766	A	G	A	3	3,0	G	11	0,11	R	12	1,11	R	26	12,14	SYNONYMOUS_CODING	ggT/ggC	TraesCS1A02G067200
chr1A	49252857	T	C	T	14	14,0	C	6	0,6	C	9	0,9	C	27	0,27	NON_SYNONYMOUS_CODING	cAc/cGc	TraesCS1A02G067200
chr1A	49275511	A	C	A	1	1,0	M	3	1,2	A	16	16,0	A	19	19,0	NON_SYNONYMOUS_CODING	Aat/Cat	TraesCS1A02G067300
chr1A	49277500	C	A	N	.	.	A	12	0,12	M	7	1,6	M	19	5,14	NON_SYNONYMOUS_CODING	Ctt/Att	TraesCS1A02G067300
chr1A	49278192	G	A	G	4	4,0	A	9	0,9	A	2	0,2	R	21	7,14	SYNONYMOUS_CODING	gaG/gaA	TraesCS1A02G067300
chr1A	49284275	T	C	Y	5	3,2	T	8	8,0	T	21	21,0	T	22	22,0	NON_SYNONYMOUS_CODING	gTc/gCc	TraesCS1A02G067300
chr1A	49284876	G	T	K	4	2,2	G	13	13,0	G	11	11,0	G	38	38,0	STOP_GAINED	Gga/Tga	TraesCS1A02G067300
chr1A	49284983	T	C	Y	5	3,2	T	20	20,0	T	15	15,0	T	34	34,0	SYNONYMOUS_CODING	ccT/ccC	TraesCS1A02G067300
chr1A	49287550	A	G	A	12	12,0	G	14	0,14	R	17	2,15	R	34	19,15	SYNONYMOUS_CODING	tcA/tcG	TraesCS1A02G067300
chr1A	49287733	A	G	A	9	9,0	G	21	0,21	R	23	3,20	R	39	15,24	NON_SYNONYMOUS_CODING	tAc/tGc	TraesCS1A02G067300
chr1A	49288334	G	T	G	14	14,0	G	16	16,0	K	11	6,5	G	23	23,0	NON_SYNONYMOUS_CODING	aaG/aaT	TraesCS1A02G067300
chr1A	49288383	C	T	C	11	11,0	T	14	0,14	Y	12	7,5	Y	27	4,23	UTR_3_PRIME
chr1A	49323705	A	G	R	9	1,8	N	.	.	G	3	0,3	G	17	0,17	UNKNOWN
chr1A	49324946	G	A	A	26	0,26	N	.	.	A	8	0,8	A	20	0,20	UNKNOWN
chr1A	49324955	C	T	T	25	0,25	N	.	.	T	4	0,4	T	13	0,13	UNKNOWN
chr1A	49325014	T	C	C	35	0,35	N	.	.	C	5	0,5	C	27	0,27	UNKNOWN
chr1A	49325536	G	A	G	54	54,0	N	.	.	A	5	0,5	A	10	0,10	UNKNOWN
chr1A	49325753	A	G	G	12	0,12	N	.	.	G	2	0,2	G	8	0,8	UNKNOWN
chr1A	49347476	T	G	N	.	.	N	.	.	N	.	.	G	6	0,6	NON_SYNONYMOUS_CODING	aTa/aGa	TraesCS1A02G067600
chr1A	49347605	G	A	N	.	.	A	2	0,2	A	1	0,1	A	7	0,7	NON_SYNONYMOUS_CODING	cGg/cAg	TraesCS1A02G067600
chr1A	49361187	G	T	G	1	1,0	K	3	1,2	G	1	1,0	G	10	10,0	UTR_5_PRIME
chr1A	49361637	T	C	T	3	3,0	N	.	.	Y	8	5,3	T	6	6,0	NON_SYNONYMOUS_CODING	cTc/cCc	TraesCS1A02G067900
chr1A	49365396	C	G	S	1	1,0	G	3	0,3	G	3	0,3	S	4	1,3	UTR_3_PRIME
chr1A	49486044	G	T	G	4	4,0	T	7	0,7	K	12	4,8	K	11	7,4	NON_SYNONYMOUS_CODING	Ctg/Atg	TraesCS1A02G068100
chr1A	49525183	G	A	G	8	8,0	A	19	0,19	R	12	1,11	R	23	10,13	DOWNSTREAM
chr1A	49526141	G	A	G	37	37,0	G	2	2,0	R	14	11,3	G	24	24,0	DOWNSTREAM
chr1A	49526194	A	G	A	32	32,0	R	7	5,2	A	12	11,1	A	30	30,0	DOWNSTREAM
chr1A	49526586	T	C	C	8	0,8	T	6	6,0	Y	10	9,1	Y	10	7,3	DOWNSTREAM
chr1A	49528833	C	T	T	2	0,2	N	.	.	T	2	0,2	T	1	0,1	INTRON
chr1A	49896624	G	C	N	.	.	C	1	0,1	N	.	.	S	5	4,1	DOWNSTREAM
chr1A	49896710	T	C	T	3	3,0	C	17	0,17	C	16	1,15	Y	26	10,16	UTR_3_PRIME
chr1A	49896730	T	C	C	3	0,3	T	22	22,0	T	20	19,1	Y	30	18,12	UTR_3_PRIME
chr1A	49961451	G	A	N	.	.	G	1	1,0	G	5	5,0	R	26	21,5	SYNONYMOUS_CODING	gaC/gaT	TraesCS1A02G068500
chr1A	49995340	A	G	A	2	2,0	R	6	4,2	A	7	7,0	A	17	17,0	UNKNOWN
chr1A	49995431	C	T	N	.	.	T	5	0,5	T	9	0,9	T	17	0,17	UNKNOWN
chr1A	49996699	G	A	A	1	0,1	A	7	0,7	A	3	0,3	A	24	0,24	UNKNOWN
chr1A	49997174	G	A	G	1	1,0	G	23	23,0	R	12	10,2	R	26	22,4	UNKNOWN
chr1A	49997423	G	C	C	2	0,2	G	13	13,0	G	2	2,0	S	15	9,6	UNKNOWN
chr1A	49997460	A	G	G	4	0,4	A	15	15,0	A	3	3,0	R	19	13,6	UNKNOWN
chr1A	49997573	T	A	A	4	0,4	T	7	7,0	W	8	5,3	W	22	17,5	UNKNOWN
chr1A	50134043	C	T	N	.	.	T	11	0,11	T	12	2,10	T	12	0,12	INTERGENIC
chr1A	50281937	A	G	N	.	.	G	8	0,8	G	38	0,38	G	27	0,27	INTERGENIC
chr1A	50281995	C	T	N	.	.	T	7	0,7	T	33	0,33	T	25	0,25	INTERGENIC
chr1A	50282079	A	G	G	2	0,2	G	1	0,1	G	18	0,18	G	11	0,11	INTERGENIC
chr1A	50282088	C	T	T	2	0,2	T	1	0,1	T	18	0,18	T	9	0,9	INTERGENIC
chr1A	50282301	A	G	G	2	0,2	G	9	0,9	G	22	0,22	G	20	0,20	INTERGENIC
chr1A	50282375	T	C	N	.	.	C	7	0,7	C	20	0,20	C	13	0,13	INTERGENIC
chr1A	50282824	T	C	N	.	.	C	2	0,2	C	2	0,2	C	5	0,5	INTERGENIC
chr1A	50282846	G	A	N	.	.	A	4	0,4	A	6	0,6	A	14	0,14	INTERGENIC
chr1A	50520644	C	T	N	.	.	N	.	.	Y	1	0,1	C	10	10,0	INTERGENIC
chr1A	50697839	C	T	N	.	.	T	3	0,3	T	1	0,1	T	9	0,9	INTERGENIC
chr1A	50925797	A	G	G	3	0,3	G	10	0,10	G	4	0,4	G	9	0,9	INTERGENIC
chr1A	51700511	G	A	N	.	.	A	1	0,1	A	2	0,2	A	3	0,3	INTRON
chr1A	51700545	G	C	N	.	.	C	1	0,1	C	4	0,4	C	2	0,2	INTRON
chr1A	51703072	T	C	N	.	.	T	5	5,0	Y	6	4,2	T	6	6,0	INTRON
chr1A	51703485	T	A	T	2	2,0	T	1	1,0	W	2	1,1	W	2	1,1	INTRON
chr1A	51706452	C	A	C	1	1,0	C	1	1,0	M	8	6,2	C	4	4,0	INTRON
chr1A	51707085	T	C	T	3	3,0	T	7	7,0	T	21	21,0	Y	9	7,2	UTR_3_PRIME
chr1A	51707962	C	T	N	.	.	C	2	2,0	N	.	.	Y	3	1,2	DOWNSTREAM
chr1A	51708692	C	T	N	.	.	C	2	2,0	Y	9	5,4	Y	14	12,2	DOWNSTREAM
chr1A	52057318	G	A	R	1	0,1	G	1	1,0	G	4	4,0	G	10	10,0	INTRON
chr1A	52058482	T	A	N	.	.	T	2	2,0	T	3	3,0	W	7	2,5	INTRON
chr1A	52058668	C	T	N	.	.	C	5	5,0	C	4	4,0	Y	10	8,2	INTRON
chr1A	52058778	C	G	S	4	1,3	C	8	8,0	C	5	5,0	C	16	16,0	INTRON
chr1A	52058881	G	A	A	5	0,5	G	4	4,0	G	5	5,0	G	9	9,0	INTRON
chr1A	52456250	C	T	N	.	.	N	.	.	C	2	2,0	Y	3	1,2	INTRON
chr1A	52456870	T	A	N	.	.	T	1	1,0	T	2	2,0	W	4	2,2	INTRON
chr1A	52459165	T	G	T	3	3,0	T	11	11,0	K	8	6,2	T	13	13,0	UTR_3_PRIME
chr1A	52520001	C	T	N	.	.	C	3	3,0	C	6	6,0	Y	5	3,2	UTR_3_PRIME
chr1A	52520078	A	G	N	.	.	A	6	6,0	A	11	11,0	R	6	4,2	UTR_3_PRIME
chr1A	53035562	G	A	A	1	0,1	A	3	0,3	N	.	.	A	3	0,3	INTRON
chr1A	53037081	G	C	C	3	0,3	C	10	0,10	C	20	0,20	C	19	0,19	SYNONYMOUS_CODING	gcC/gcG	TraesCS1A02G070300
chr1A	53037404	G	C	G	4	4,0	S	14	10,4	G	45	45,0	G	30	30,0	NON_SYNONYMOUS_CODING	Cgc/Ggc	TraesCS1A02G070300
chr1A	53186485	C	T	T	5	0,5	T	1	0,1	T	1	0,1	T	1	0,1	DOWNSTREAM
chr1A	53186506	A	G	G	5	0,5	G	1	0,1	G	1	0,1	G	1	0,1	DOWNSTREAM
chr1A	53186741	T	C	C	7	0,7	C	4	0,4	C	8	0,8	C	13	0,13	DOWNSTREAM
chr1A	53186859	C	A	C	9	9,0	C	7	7,0	C	19	19,0	M	26	17,9	DOWNSTREAM
chr1A	53186894	C	T	C	7	7,0	C	6	6,0	C	23	23,0	Y	29	14,15	DOWNSTREAM
chr1A	53186969	G	A	A	7	0,7	A	8	0,8	A	23	0,23	A	30	0,30	DOWNSTREAM
chr1A	53187108	C	A	N	.	.	N	.	.	M	7	5,2	C	16	16,0	DOWNSTREAM
chr1A	53187824	G	A	G	9	9,0	G	15	15,0	R	12	9,3	R	47	33,14	INTRON
chr1A	53187864	C	A	C	7	7,0	C	11	11,0	M	12	10,2	M	38	30,8	INTRON
chr1A	53189071	G	C	N	.	.	C	2	0,2	C	4	0,4	C	8	0,8	INTRON
chr1A	53351438	A	G	N	.	.	N	.	.	G	4	0,4	G	12	0,12	UNKNOWN
chr1A	53351633	C	A	N	.	.	N	.	.	C	2	2,0	M	8	6,2	UNKNOWN
chr1A	53454230	T	C	N	.	.	N	.	.	C	2	0,2	C	3	0,3	UTR_3_PRIME
chr1A	53454337	A	G	N	.	.	N	.	.	G	5	0,5	G	3	0,3	UTR_3_PRIME
chr1A	53455920	G	A	G	3	3,0	N	.	.	A	3	0,3	R	5	3,2	NON_SYNONYMOUS_CODING	aCg/aTg	TraesCS1A02G070600
chr1A	53455946	T	C	C	3	0,3	N	.	.	C	1	0,1	C	7	0,7	SYNONYMOUS_CODING	ccA/ccG	TraesCS1A02G070600
chr1A	53456004	G	C	G	4	4,0	N	.	.	S	6	5,1	S	19	11,8	NON_SYNONYMOUS_CODING	gCg/gGg	TraesCS1A02G070600
chr1A	53456513	A	G	G	3	0,3	N	.	.	R	14	2,12	R	12	3,9	SYNONYMOUS_CODING	tcT/tcC	TraesCS1A02G070600
chr1A	53456710	G	T	N	.	.	T	1	0,1	T	6	0,6	K	10	4,6	SYNONYMOUS_CODING	Cgg/Agg	TraesCS1A02G070600
chr1A	53550294	A	G	N	.	.	N	.	.	N	.	.	G	14	0,14	INTERGENIC
chr1A	53550719	G	A	A	3	0,3	N	.	.	G	2	2,0	G	13	13,0	INTERGENIC
chr1A	53550773	C	T	T	5	0,5	N	.	.	C	4	4,0	C	15	15,0	INTERGENIC
chr1A	53551103	C	T	Y	1	0,1	N	.	.	C	1	1,0	C	17	17,0	INTERGENIC
chr1A	53551114	T	C	Y	1	0,1	N	.	.	N	.	.	T	18	18,0	INTERGENIC
chr1A	53551345	C	G	G	10	0,10	N	.	.	N	.	.	C	13	13,0	INTERGENIC
chr1A	53551438	G	A	A	14	0,14	N	.	.	N	.	.	G	13	13,0	INTERGENIC
chr1A	53552008	A	G	G	14	0,14	N	.	.	A	1	1,0	A	10	10,0	INTERGENIC
chr1A	53552373	A	G	G	18	0,18	N	.	.	A	1	1,0	A	17	17,0	INTERGENIC
chr1A	53552431	A	G	G	21	0,21	N	.	.	A	1	1,0	A	18	18,0	INTERGENIC
chr1A	53552681	C	T	T	22	0,22	N	.	.	N	.	.	C	18	18,0	INTERGENIC
chr1A	53552850	T	C	C	18	0,18	N	.	.	N	.	.	T	15	15,0	INTERGENIC
chr1A	53553000	C	T	T	17	0,17	N	.	.	N	.	.	C	13	13,0	INTERGENIC
chr1A	53553128	C	T	T	21	0,21	N	.	.	N	.	.	C	16	16,0	INTERGENIC
chr1A	53553650	T	G	G	5	0,5	N	.	.	T	1	1,0	T	10	10,0	INTERGENIC
chr1A	53553688	A	G	G	3	0,3	N	.	.	A	1	1,0	A	11	11,0	INTERGENIC
chr1A	53878363	G	A	N	.	.	N	.	.	N	.	.	A	6	1,5	INTERGENIC
chr1A	53882179	T	A	A	13	0,13	T	17	17,0	T	18	18,0	T	15	15,0	UNKNOWN
chr1A	53882451	T	C	C	36	0,36	T	14	14,0	T	18	18,0	T	10	10,0	UNKNOWN
chr1A	53882704	T	C	C	6	0,6	C	1	0,1	C	1	0,1	C	1	0,1	UNKNOWN
chr1A	53882801	G	A	N	.	.	A	2	0,2	A	4	0,4	A	4	0,4	UNKNOWN
chr1A	53882815	C	G	N	.	.	G	3	0,3	G	5	0,5	G	5	0,5	UNKNOWN
chr1A	53895568	T	C	C	2	0,2	C	1	0,1	C	3	0,3	C	6	0,6	UNKNOWN
chr1A	53895890	G	A	A	4	0,4	A	1	0,1	A	2	0,2	A	4	0,4	UNKNOWN
chr1A	53897209	T	A	A	1	0,1	A	3	0,3	A	3	0,3	A	1	0,1	UNKNOWN
chr1A	53897298	T	C	C	2	0,2	C	5	0,5	C	3	0,3	C	3	0,3	UNKNOWN
chr1A	53897324	T	G	G	1	0,1	G	5	0,5	G	4	0,4	G	3	0,3	UNKNOWN
chr1A	53897756	A	C	C	1	0,1	C	2	0,2	C	2	0,2	M	6	2,4	UNKNOWN
chr1A	53897777	C	T	T	1	0,1	T	3	0,3	T	4	0,4	Y	6	2,4	UNKNOWN
chr1A	53901005	T	A	T	6	6,0	A	12	0,12	W	5	1,4	W	42	20,22	DOWNSTREAM
chr1A	53901451	C	T	C	4	4,0	T	12	0,12	Y	21	3,18	Y	44	7,37	DOWNSTREAM
chr1A	53907591	A	G	R	1	1,0	G	1	0,1	G	1	0,1	R	5	3,2	SYNONYMOUS_CODING	ggT/ggC	TraesCS1A02G071300
chr1A	54000918	C	G	G	12	0,12	G	3	0,3	G	12	0,12	G	7	0,7	NON_SYNONYMOUS_CODING	Ccc/Gcc	TraesCS1A02G071500
chr1A	54002063	A	G	A	33	33,0	G	8	0,8	R	20	3,17	R	21	14,7	NON_SYNONYMOUS_CODING	Aac/Gac	TraesCS1A02G071500
chr1A	54002778	G	A	G	14	14,0	A	14	0,14	R	11	6,5	R	12	10,2	DOWNSTREAM
chr1A	54002836	C	T	C	8	8,0	T	2	0,2	C	5	5,0	Y	11	6,5	DOWNSTREAM
chr1A	54002842	G	A	G	8	8,0	A	2	0,2	G	4	4,0	R	11	6,5	DOWNSTREAM
chr1A	54003144	C	A	M	1	1,0	A	8	0,8	M	5	1,4	A	9	0,9	DOWNSTREAM
chr1A	54004838	A	C	A	1	1,0	N	.	.	M	1	0,1	M	9	7,2	DOWNSTREAM
chr1A	54005386	A	G	A	1	1,0	R	2	1,1	A	4	4,0	A	5	5,0	DOWNSTREAM
chr1A	54005809	T	C	T	1	1,0	Y	1	0,1	Y	3	2,1	Y	4	2,2	DOWNSTREAM
chr1A	54006170	C	G	N	.	.	N	.	.	G	1	0,1	S	8	6,2	DOWNSTREAM
chr1A	54006200	C	T	N	.	.	N	.	.	T	1	0,1	Y	4	2,2	DOWNSTREAM
chr1A	54006299	G	A	N	.	.	A	4	0,4	A	2	0,2	R	9	3,6	DOWNSTREAM
chr1A	54006456	A	T	N	.	.	T	3	0,3	T	1	0,1	W	5	2,3	DOWNSTREAM
chr1A	54006591	A	G	A	2	2,0	G	5	0,5	R	5	1,4	R	22	7,15	DOWNSTREAM
chr1A	54007150	A	G	A	4	4,0	G	2	0,2	G	2	0,2	R	10	6,4	DOWNSTREAM
chr1A	54008049	C	A	C	12	12,0	A	2	0,2	N	.	.	M	8	6,2	DOWNSTREAM
chr1A	54008075	A	G	A	9	9,0	A	4	3,1	N	.	.	R	11	7,4	DOWNSTREAM
chr1A	54008116	A	T	A	7	7,0	W	6	4,2	A	2	2,0	A	11	11,0	DOWNSTREAM
chr1A	54008416	G	A	G	3	3,0	R	13	8,5	R	8	4,4	R	20	14,6	DOWNSTREAM
chr1A	54009324	T	C	T	6	6,0	C	3	0,3	T	1	1,0	Y	6	3,3	NON_SYNONYMOUS_CODING	Atc/Gtc	TraesCS1A02G071600
chr1A	54011167	G	T	G	1	1,0	T	6	0,6	N	.	.	K	3	2,1	UPSTREAM
chr1A	54023308	G	T	T	3	0,3	G	1	1,0	G	7	7,0	K	8	6,2	INTRON
chr1A	54023481	G	C	G	3	3,0	C	1	0,1	C	6	0,6	S	4	1,3	INTRON
chr1A	54024507	T	C	Y	1	1,0	C	4	0,4	C	5	0,5	Y	11	4,7	INTRON
chr1A	54025043	A	G	N	.	.	G	3	2,1	G	3	0,3	R	3	1,2	INTRON
chr1A	54027005	C	G	C	7	7,0	S	16	13,3	C	20	20,0	C	37	37,0	NON_SYNONYMOUS_CODING	gGc/gCc	TraesCS1A02G071700
chr1A	54027372	A	G	A	3	3,0	G	8	0,8	G	32	2,30	R	25	3,22	UTR_5_PRIME
chr1A	54076575	A	C	A	16	16,0	M	2	0,2	A	1	1,0	A	11	11,0	INTRON
chr1A	54076584	G	T	G	16	16,0	K	2	0,2	G	1	1,0	G	10	10,0	INTRON
chr1A	54076663	G	A	G	15	15,0	N	.	.	R	4	1,3	G	8	8,0	INTRON
chr1A	54076827	A	G	A	16	16,0	N	.	.	R	4	3,1	R	4	3,1	INTRON
chr1A	54076995	G	A	R	16	13,3	G	4	4,0	G	17	17,0	G	28	28,0	INTRON
chr1A	54077243	G	T	G	9	9,0	T	5	0,5	K	17	2,15	K	25	12,13	INTRON
chr1A	54077367	T	C	T	20	20,0	C	3	0,3	C	7	0,7	Y	21	15,6	UTR_5_PRIME
chr1A	54077585	A	G	A	19	19,0	N	.	.	R	3	2,1	R	16	10,6	UTR_5_PRIME
chr1A	54077878	G	A	G	11	11,0	N	.	.	A	2	0,2	R	7	2,5	UPSTREAM
chr1A	54077988	T	G	T	3	3,0	N	.	.	G	5	0,5	K	4	2,2	UPSTREAM
chr1A	54078215	C	A	C	11	11,0	N	.	.	M	8	3,5	M	11	5,6	UPSTREAM
chr1A	54353814	G	C	N	.	.	N	.	.	C	2	0,2	S	3	1,2	INTRON
chr1A	54355180	T	C	T	14	14,0	T	6	6,0	Y	14	8,6	T	24	24,0	UTR_3_PRIME
chr1A	54460573	T	C	C	3	0,3	N	.	.	C	11	0,11	C	2	0,2	SYNONYMOUS_CODING	aaT/aaC	TraesCS1A02G072100
chr1A	56619493	G	C	N	.	.	S	7	5,2	G	3	3,0	G	9	9,0	DOWNSTREAM
chr1A	56619698	T	C	T	1	1,0	Y	7	5,2	T	6	6,0	T	11	11,0	DOWNSTREAM
chr1A	57186838	C	G	N	.	.	G	3	0,3	N	.	.	G	3	0,3	INTRON
chr1A	57186875	T	C	N	.	.	C	3	0,3	N	.	.	C	3	0,3	INTRON
chr1A	57193587	C	T	Y	7	5,2	C	2	2,0	C	2	2,0	C	6	6,0	NON_SYNONYMOUS_CODING	Ccg/Tcg	TraesCS1A02G073100
chr1A	57205484	C	G	C	3	3,0	G	4	0,4	S	5	4,1	C	7	7,0	SYNONYMOUS_CODING	ctC/ctG	TraesCS1A02G073200
chr1A	57206562	G	A	G	6	6,0	A	7	0,7	R	5	4,1	G	16	16,0	NON_SYNONYMOUS_CODING	Gac/Aac	TraesCS1A02G073200
chr1A	57209838	A	T	W	1	1,0	T	2	0,2	T	11	0,11	W	8	5,3	UTR_3_PRIME
chr1A	57210315	A	G	A	10	10,0	R	8	5,3	A	7	7,0	A	12	12,0	INTRON
chr1A	57210345	G	T	G	10	10,0	T	6	0,6	T	6	0,6	K	12	3,9	INTRON
chr1A	57212196	C	A	C	6	6,0	A	5	0,5	A	14	0,14	M	10	4,6	NON_SYNONYMOUS_CODING	Gcg/Tcg	TraesCS1A02G073300
chr1A	57212670	C	T	N	.	.	T	10	0,10	Y	10	2,8	Y	3	2,1	NON_SYNONYMOUS_CODING	Gcc/Acc	TraesCS1A02G073300
chr1A	57218371	A	G	A	2	2,0	A	1	1,0	N	.	.	R	3	2,1	UNKNOWN
chr1A	57218584	G	T	G	3	3,0	G	3	3,0	G	3	3,0	K	4	2,2	UNKNOWN
chr1A	57218883	C	T	N	.	.	T	1	0,1	T	12	0,12	T	1	0,1	UNKNOWN
chr1A	57219031	G	A	N	.	.	A	1	0,1	A	10	0,10	A	1	0,1	UNKNOWN
chr1A	57303138	A	T	N	.	.	T	1	0,1	T	1	0,1	W	2	1,1	INTRON
chr1A	57303317	C	T	N	.	.	T	2	0,2	N	.	.	Y	2	1,1	INTRON
chr1A	57303721	G	A	G	1	1,0	R	1	0,1	R	3	1,2	R	5	4,1	INTRON
chr1A	57304295	C	T	Y	1	1,0	T	2	0,2	N	.	.	Y	3	1,2	INTRON
chr1A	57305630	G	T	G	9	9,0	K	19	16,3	G	21	21,0	G	44	44,0	NON_SYNONYMOUS_CODING	gCg/gAg	TraesCS1A02G073400
chr1A	57306421	A	G	A	10	10,0	A	9	9,0	R	9	7,2	A	31	31,0	NON_SYNONYMOUS_CODING	cTt/cCt	TraesCS1A02G073400
chr1A	57307066	A	G	R	3	1,2	A	2	2,0	A	8	8,0	A	23	23,0	SYNONYMOUS_CODING	ccT/ccC	TraesCS1A02G073400
chr1A	57307559	G	A	G	4	4,0	A	6	0,6	A	13	1,12	R	23	9,14	UTR_5_PRIME
chr1A	57390664	G	A	G	6	6,0	N	.	.	R	1	0,1	R	7	4,3	NON_SYNONYMOUS_CODING	aCc/aTc	TraesCS1A02G073500
chr1A	57390816	T	C	T	7	7,0	C	2	0,2	Y	7	1,6	Y	10	7,3	SYNONYMOUS_CODING	gaA/gaG	TraesCS1A02G073500
chr1A	57391122	G	C	G	7	7,0	C	3	0,3	S	8	6,2	S	6	4,2	SYNONYMOUS_CODING	gtC/gtG	TraesCS1A02G073500
chr1A	57391521	T	C	T	7	7,0	Y	1	0,1	Y	2	1,1	Y	12	6,6	SYNONYMOUS_CODING	ccA/ccG	TraesCS1A02G073500
chr1A	57391567	G	A	G	3	3,0	A	2	0,2	R	2	1,1	R	15	10,5	NON_SYNONYMOUS_CODING	gCc/gTc	TraesCS1A02G073500
chr1A	57391758	A	G	A	6	6,0	G	5	0,5	G	5	0,5	R	8	6,2	SYNONYMOUS_CODING	gaT/gaC	TraesCS1A02G073500
chr1A	57391808	C	T	C	5	5,0	T	7	0,7	T	3	0,3	Y	12	7,5	NON_SYNONYMOUS_CODING	Ggt/Agt	TraesCS1A02G073500
chr1A	57392099	G	A	G	11	11,0	A	4	0,4	R	5	2,3	R	11	6,5	SYNONYMOUS_CODING	Ctg/Ttg	TraesCS1A02G073500
chr1A	57393032	G	C	G	34	34,0	C	3	0,3	S	10	8,2	S	21	12,9	NON_SYNONYMOUS_CODING	aaC/aaG	TraesCS1A02G073500
chr1A	57393412	A	G	A	30	30,0	G	3	0,3	R	8	7,1	R	24	15,9	SYNONYMOUS_CODING	aaT/aaC	TraesCS1A02G073500
chr1A	57393837	G	A	G	12	12,0	G	7	7,0	G	7	7,0	R	17	14,3	NON_SYNONYMOUS_CODING	gCa/gTa	TraesCS1A02G073500
chr1A	57394015	T	C	T	10	10,0	C	8	0,8	Y	9	1,8	T	13	13,0	SYNONYMOUS_CODING	caA/caG	TraesCS1A02G073500
chr1A	57394458	A	G	A	13	13,0	G	18	0,18	R	11	3,8	R	26	21,5	NON_SYNONYMOUS_CODING	gTc/gCc	TraesCS1A02G073500
chr1A	57394691	G	A	G	7	7,0	G	11	11,0	R	8	6,2	G	20	20,0	NON_SYNONYMOUS_CODING	Cca/Tca	TraesCS1A02G073500
chr1A	57396934	G	A	G	2	2,0	N	.	.	N	.	.	R	5	4,1	DOWNSTREAM
chr1A	57398492	T	A	T	4	4,0	N	.	.	A	1	0,1	A	7	0,7	NON_SYNONYMOUS_CODING	tAt/tTt	TraesCS1A02G073600
chr1A	57398627	G	T	G	2	2,0	N	.	.	K	1	0,1	K	7	4,3	NON_SYNONYMOUS_CODING	gCt/gAt	TraesCS1A02G073600
chr1A	57398767	T	C	N	.	.	T	1	1,0	N	.	.	Y	4	2,2	NON_SYNONYMOUS_CODING	atA/atG	TraesCS1A02G073600
chr1A	57398852	C	T	N	.	.	C	1	1,0	C	2	2,0	Y	3	1,2	NON_SYNONYMOUS_CODING	cGa/cAa	TraesCS1A02G073600
chr1A	57399442	C	T	N	.	.	T	1	0,1	N	.	.	T	4	0,4	SYNONYMOUS_CODING	gaG/gaA	TraesCS1A02G073600
chr1A	57634492	T	C	N	.	.	C	8	0,8	C	5	0,5	Y	10	3,7	INTRON
chr1A	57635401	C	A	C	6	6,0	A	7	0,7	M	14	4,10	M	17	5,12	INTRON
chr1A	57769611	C	T	C	10	10,0	T	13	0,13	Y	10	1,9	Y	23	5,18	UTR_3_PRIME
chr1A	57770714	G	A	N	.	.	N	.	.	A	8	0,8	A	3	0,3	DOWNSTREAM
chr1A	57770815	C	T	N	.	.	T	1	0,1	T	6	0,6	T	2	0,2	DOWNSTREAM
chr1A	57771093	A	G	N	.	.	G	4	0,4	G	16	0,16	G	1	0,1	DOWNSTREAM
chr1A	57771210	A	G	N	.	.	G	4	0,4	G	11	0,11	G	1	0,1	DOWNSTREAM
chr1A	58122381	C	T	C	13	13,0	T	4	0,4	Y	11	3,8	Y	32	25,7	UPSTREAM
chr1A	58123230	C	G	C	2	2,0	G	1	0,1	G	3	0,3	S	2	1,1	UPSTREAM
chr1A	58125234	G	T	G	5	5,0	G	2	2,0	G	4	4,0	K	5	3,2	INTRON
chr1A	58162054	A	G	N	.	.	N	.	.	G	2	0,2	G	6	0,6	UNKNOWN
chr1A	58163042	G	A	G	2	2,0	N	.	.	R	3	1,2	R	5	4,1	UPSTREAM
chr1A	58163219	A	G	A	1	1,0	R	1	0,1	A	2	2,0	R	11	8,3	UPSTREAM
chr1A	58171253	A	T	A	13	13,0	T	13	0,13	W	19	2,17	W	47	18,29	NON_SYNONYMOUS_CODING	Tac/Aac	TraesCS1A02G075000
chr1A	58171954	T	C	T	7	7,0	C	11	4,7	Y	29	14,15	Y	38	28,10	NON_SYNONYMOUS_CODING	gAt/gGt	TraesCS1A02G075000
chr1A	58172070	A	T	A	4	4,0	W	11	8,3	A	22	22,0	A	23	23,0	SYNONYMOUS_CODING	ccT/ccA	TraesCS1A02G075000
chr1A	58172084	G	A	G	3	3,0	A	11	1,10	R	23	4,19	R	20	8,12	SYNONYMOUS_CODING	Ctg/Ttg	TraesCS1A02G075000
chr1A	58174934	A	T	N	.	.	T	7	0,7	W	10	1,9	W	21	6,15	NON_SYNONYMOUS_CODING	aaT/aaA	TraesCS1A02G075000
chr1A	58175087	G	T	N	.	.	T	9	0,9	T	16	1,15	K	20	6,14	NON_SYNONYMOUS_CODING	Ctt/Att	TraesCS1A02G075000
chr1A	58177076	A	G	N	.	.	G	8	0,8	R	26	3,23	R	18	14,4	SPLICE_SITE_REGION
chr1A	58177744	A	G	N	.	.	G	2	0,2	G	4	0,4	R	9	6,3	UTR_5_PRIME
chr1A	58200706	A	G	A	4	4,0	R	8	6,2	A	12	12,0	A	16	16,0	NON_SYNONYMOUS_CODING	cTg/cCg	TraesCS1A02G075100
chr1A	58236375	A	G	N	.	.	G	13	0,13	G	16	0,16	G	18	0,18	UNKNOWN
chr1A	58254080	G	A	N	.	.	G	4	4,0	G	12	12,0	R	19	13,6	UNKNOWN
chr1A	58281639	G	T	N	.	.	N	.	.	G	2	2,0	K	6	2,4	INTERGENIC
chr1A	58291132	T	C	Y	2	0,2	T	1	1,0	N	.	.	T	7	7,0	DOWNSTREAM
chr1A	58295302	G	A	A	3	0,3	A	6	0,6	A	1	0,1	A	3	0,3	DOWNSTREAM
chr1A	58481682	G	T	G	4	4,0	G	6	6,0	K	9	7,2	G	9	9,0	NON_SYNONYMOUS_CODING	Ctg/Atg	TraesCS1A02G075500
chr1A	58482048	T	C	T	1	1,0	T	1	1,0	Y	10	8,2	T	6	6,0	INTRON
chr1A	59134401	A	G	A	4	4,0	R	13	11,2	A	12	12,0	R	19	16,3	SYNONYMOUS_CODING	gcT/gcC	TraesCS1A02G076400
chr1A	59212562	A	C	N	.	.	C	1	0,1	C	22	0,22	C	16	0,16	SYNONYMOUS_CODING	gcA/gcC	TraesCS1A02G076500
chr1A	59212936	C	T	N	.	.	C	1	1,0	C	8	8,0	Y	14	10,4	NON_SYNONYMOUS_CODING	gCg/gTg	TraesCS1A02G076500
chr1A	59213265	G	T	G	1	1,0	N	.	.	G	12	12,0	K	16	13,3	NON_SYNONYMOUS_CODING	Ggc/Tgc	TraesCS1A02G076500
chr1A	59596448	T	C	C	25	0,25	N	.	.	N	.	.	C	6	0,6	INTERGENIC
chr1A	59850517	C	T	T	11	0,11	T	7	0,7	T	12	0,12	T	14	0,14	UPSTREAM
chr1A	59850569	C	G	S	8	6,2	C	9	9,0	C	17	17,0	C	19	19,0	UPSTREAM
chr1A	59946582	T	C	N	.	.	C	2	0,2	C	5	0,5	C	1	0,1	DOWNSTREAM
chr1A	60188927	C	A	N	.	.	N	.	.	C	6	6,0	M	6	4,2	INTERGENIC
chr1A	60190388	A	G	A	2	2,0	N	.	.	A	4	4,0	R	4	2,2	INTERGENIC
chr1A	60278666	G	A	G	1	1,0	G	1	1,0	G	2	2,0	R	10	7,3	INTERGENIC
chr1A	60278901	G	A	G	1	1,0	N	.	.	R	9	7,2	G	5	5,0	INTERGENIC
chr1A	60574906	G	T	G	7	7,0	K	8	6,2	G	18	18,0	G	19	19,0	INTERGENIC
chr1A	60575035	T	C	T	12	12,0	Y	11	8,3	T	30	30,0	T	28	28,0	INTERGENIC
chr1A	61032747	G	A	N	.	.	A	5	0,5	A	17	0,17	A	9	0,9	NON_SYNONYMOUS_CODING	Gag/Aag	TraesCS1A02G078400
chr1A	61095897	G	A	G	2	2,0	G	11	11,0	G	4	4,0	R	8	6,2	UNKNOWN
chr1A	61118713	G	C	N	.	.	G	1	1,0	G	5	5,0	S	7	5,2	UNKNOWN
chr1A	61341958	T	A	T	2	2,0	T	10	10,0	T	31	31,0	W	19	14,5	STOP_GAINED	taT/taA	TraesCS1A02G078600
chr1A	61385100	C	T	C	6	6,0	Y	2	1,1	C	9	9,0	C	23	23,0	UTR_3_PRIME
chr1A	61387314	C	T	Y	9	7,2	C	7	7,0	C	7	7,0	C	8	8,0	INTRON
chr1A	62610876	C	T	C	1	1,0	C	6	6,0	Y	4	2,2	C	7	7,0	INTRON
chr1A	62611555	T	C	T	5	5,0	T	9	9,0	Y	15	9,6	Y	25	19,6	SYNONYMOUS_CODING	gtT/gtC	TraesCS1A02G079700
chr1A	62616287	A	G	A	4	4,0	R	6	4,2	A	3	3,0	A	9	9,0	INTRON
chr1A	63050590	A	G	A	9	9,0	A	6	6,0	A	6	6,0	R	13	10,3	DOWNSTREAM
chr1A	63294276	A	G	N	.	.	A	14	14,0	R	7	5,2	A	16	16,0	UNKNOWN
chr1A	63476559	T	G	T	2	2,0	N	.	.	K	6	4,2	T	15	15,0	INTRON
chr1A	63744822	G	A	G	4	4,0	R	15	12,3	G	24	24,0	G	21	21,0	INTRON
chr1A	63746173	A	C	A	6	6,0	A	7	7,0	A	18	18,0	M	16	13,3	INTRON
chr1A	63754107	T	C	T	1	1,0	T	3	3,0	Y	7	5,2	T	6	6,0	UNKNOWN
chr1A	63754122	T	C	T	1	1,0	T	2	2,0	T	6	6,0	Y	4	1,3	UNKNOWN
chr1A	63755362	T	C	Y	6	2,4	T	3	3,0	T	7	7,0	T	7	7,0	UNKNOWN
chr1A	63755957	G	T	K	7	4,3	N	.	.	G	1	1,0	G	6	6,0	UNKNOWN
chr1A	63755990	C	T	C	7	7,0	N	.	.	C	2	2,0	Y	6	4,2	UNKNOWN
chr1A	63756252	T	C	N	.	.	T	2	2,0	T	1	1,0	Y	3	1,2	UNKNOWN
chr1A	64907291	A	G	N	.	.	G	1	0,1	N	.	.	G	4	0,4	UNKNOWN
chr1A	64908377	A	G	G	3	0,3	G	11	0,11	G	10	0,10	G	17	0,17	UNKNOWN
chr1A	65121896	T	C	N	.	.	N	.	.	T	2	2,0	Y	6	3,3	INTERGENIC
chr1A	65125561	C	G	C	2	2,0	N	.	.	S	1	0,1	C	7	7,0	INTERGENIC
chr1A	65125681	C	T	T	2	0,2	N	.	.	T	1	0,1	T	5	0,5	INTERGENIC
chr1A	65262636	G	A	G	2	2,0	G	2	2,0	G	2	2,0	R	3	1,2	INTRON
chr1A	65755069	A	T	A	15	15,0	N	.	.	A	13	13,0	W	10	5,5	DOWNSTREAM
chr1A	65755112	G	A	G	13	13,0	N	.	.	R	28	24,4	G	14	14,0	DOWNSTREAM
chr1A	66175586	C	T	C	2	2,0	C	2	2,0	C	3	3,0	Y	9	7,2	NON_SYNONYMOUS_CODING	Cac/Tac	TraesCS1A02G083000
chr1A	66176556	C	T	C	1	1,0	N	.	.	C	1	1,0	Y	4	3,1	INTRON
chr1A	66176674	A	G	R	3	1,2	A	5	5,0	A	7	7,0	A	8	8,0	NON_SYNONYMOUS_CODING	Agg/Ggg	TraesCS1A02G083000
chr1A	67686817	C	T	N	.	.	C	6	6,0	C	1	1,0	Y	3	1,2	INTRON
chr1A	67689194	G	T	G	6	6,0	G	18	18,0	K	13	10,3	G	40	40,0	UTR_3_PRIME
chr1A	69185113	C	A	N	.	.	M	4	3,1	C	3	3,0	C	6	6,0	DOWNSTREAM
chr1A	70700073	A	C	A	2	2,0	A	7	7,0	A	5	5,0	M	13	10,3	INTRON
chr1A	71088957	G	A	N	.	.	G	4	4,0	G	1	1,0	R	3	1,2	NON_SYNONYMOUS_CODING	Ctt/Ttt	TraesCS1A02G085000
chr1A	71558898	A	G	R	5	3,2	A	11	11,0	A	17	17,0	A	17	17,0	SYNONYMOUS_CODING	taT/taC	TraesCS1A02G085500
chr1A	71559295	A	G	A	4	4,0	N	.	.	A	4	4,0	R	15	11,4	SPLICE_SITE_REGION
chr1A	71560034	A	G	A	4	4,0	A	2	2,0	A	12	12,0	R	13	10,3	INTRON
chr1A	71786940	A	G	A	6	6,0	R	26	22,4	A	20	20,0	A	30	30,0	SYNONYMOUS_CODING	ctT/ctC	TraesCS1A02G085900
chr1A	73298021	C	T	C	9	9,0	Y	15	13,2	C	15	15,0	C	35	35,0	INTRON
chr1A	73298128	G	T	K	4	3,1	G	15	15,0	G	13	13,0	G	22	22,0	INTRON
chr1A	73312949	C	T	T	14	0,14	T	9	0,9	T	3	0,3	T	14	0,14	UTR_3_PRIME
chr1A	73313547	C	T	C	1	1,0	Y	6	4,2	C	2	2,0	C	6	6,0	INTRON
chr1A	73313933	G	A	G	4	4,0	A	4	0,4	R	4	2,2	R	37	16,21	INTRON
chr1A	74102143	G	T	K	7	5,2	G	15	15,0	G	6	6,0	G	10	10,0	INTERGENIC
chr1A	74430817	G	T	N	.	.	N	.	.	N	.	.	K	9	6,3	DOWNSTREAM
chr1A	74431502	T	G	K	3	1,2	T	22	22,0	T	8	8,0	T	25	25,0	UTR_3_PRIME
chr1A	74734846	T	C	T	4	4,0	N	.	.	T	9	9,0	Y	4	2,2	UNKNOWN
chr1A	74735231	A	G	A	1	1,0	A	3	3,0	R	4	1,3	A	11	11,0	UNKNOWN
chr1A	74735237	A	G	A	1	1,0	A	3	3,0	R	4	2,2	A	11	11,0	UNKNOWN
chr1A	74736727	A	G	N	.	.	A	4	4,0	N	.	.	R	5	4,1	UNKNOWN
chr1A	74737070	T	A	T	3	3,0	T	12	12,0	W	12	9,3	T	21	21,0	UNKNOWN
chr1A	74739698	T	C	N	.	.	N	.	.	C	8	0,8	C	15	0,15	DOWNSTREAM
chr1A	74739766	A	T	N	.	.	N	.	.	W	10	8,2	A	27	27,0	DOWNSTREAM
chr1A	74739818	A	G	N	.	.	N	.	.	G	7	0,7	G	25	1,24	DOWNSTREAM
chr1A	74739934	A	G	R	1	1,0	N	.	.	G	8	0,8	G	21	1,20	DOWNSTREAM
chr1A	74740893	T	C	N	.	.	N	.	.	C	26	0,26	C	42	0,42	DOWNSTREAM
chr1A	74741149	C	G	N	.	.	N	.	.	G	27	0,27	G	43	0,43	DOWNSTREAM
chr1A	75516701	A	G	N	.	.	A	3	3,0	A	1	1,0	R	4	3,1	INTERGENIC
chr1A	75516790	G	A	N	.	.	G	3	3,0	G	1	1,0	R	4	2,2	INTERGENIC
chr1A	75718262	C	A	N	.	.	C	1	1,0	C	2	2,0	M	5	3,2	INTRON
chr1A	75738772	C	A	N	.	.	M	3	1,2	C	8	8,0	C	8	8,0	INTERGENIC
chr1A	76485890	C	T	C	6	6,0	C	7	7,0	C	10	10,0	Y	15	11,4	DOWNSTREAM
chr1A	76495674	C	G	C	8	8,0	C	18	18,0	S	20	14,6	C	33	33,0	NON_SYNONYMOUS_CODING	Ggg/Cgg	TraesCS1A02G088200
chr1A	76495688	G	A	R	8	6,2	G	24	24,0	G	20	20,0	G	36	36,0	NON_SYNONYMOUS_CODING	cCa/cTa	TraesCS1A02G088200
chr1A	77070589	G	T	G	1	1,0	G	8	8,0	G	14	14,0	K	9	7,2	NON_SYNONYMOUS_CODING	cGc/cTc	TraesCS1A02G088600
chr1A	77071394	C	T	N	.	.	C	15	15,0	Y	9	7,2	C	10	10,0	NON_SYNONYMOUS_CODING	Cca/Tca	TraesCS1A02G088600
chr1A	77107875	T	C	Y	3	1,2	T	2	2,0	T	3	3,0	T	15	15,0	UTR_3_PRIME
chr1A	77556597	G	A	N	.	.	N	.	.	A	1	0,1	A	3	0,3	INTERGENIC
chr1A	77794965	G	A	A	4	0,4	A	2	0,2	A	7	0,7	A	1	0,1	INTRAGENIC
chr1A	77796265	G	T	G	1	1,0	G	4	4,0	G	7	7,0	K	13	10,3	UNKNOWN
chr1A	77796687	G	T	G	1	1,0	G	2	2,0	G	3	3,0	K	7	5,2	UNKNOWN
chr1A	78955722	C	T	N	.	.	N	.	.	N	.	.	Y	4	3,1	SYNONYMOUS_CODING	gtC/gtT	TraesCS1A02G089400
chr1A	79108282	G	A	G	1	1,0	G	8	7,1	R	11	8,3	R	5	3,2	DOWNSTREAM
chr1A	79167331	T	C	T	4	4,0	Y	14	11,3	T	19	19,0	T	21	21,0	NON_SYNONYMOUS_CODING	cTc/cCc	TraesCS1A02G089800
chr1A	79167993	C	T	Y	9	6,3	C	7	7,0	C	11	11,0	C	15	15,0	SYNONYMOUS_CODING	Ctg/Ttg	TraesCS1A02G089800
chr1A	79169318	T	C	Y	1	0,1	N	.	.	T	1	1,0	T	7	7,0	UTR_3_PRIME
chr1A	79691639	A	G	A	1	1,0	A	2	2,0	R	2	0,2	A	13	13,0	INTRON
chr1A	79704222	G	A	G	1	1,0	G	1	1,0	R	7	4,3	G	12	12,0	INTRON
chr1A	80191038	A	G	R	5	3,2	A	13	13,0	A	34	34,0	A	40	40,0	NON_SYNONYMOUS_CODING	gAg/gGg	TraesCS1A02G090100
chr1A	80298053	G	T	G	1	1,0	G	4	4,0	G	13	13,0	K	17	14,3	NON_SYNONYMOUS_CODING	Gcc/Tcc	TraesCS1A02G090300
chr1A	80301126	T	A	N	.	.	T	11	11,0	W	12	10,2	T	13	13,0	NON_SYNONYMOUS_CODING	Tca/Aca	TraesCS1A02G090300
chr1A	80301888	T	A	W	3	1,2	T	10	10,0	T	10	10,0	T	12	12,0	NON_SYNONYMOUS_CODING	Tta/Ata	TraesCS1A02G090300
chr1A	82126076	A	G	A	1	1,0	A	2	2,0	A	4	4,0	R	8	6,2	UPSTREAM
chr1A	82127072	G	A	N	.	.	G	5	5,0	G	8	8,0	R	12	9,3	DOWNSTREAM
chr1A	82153202	C	A	C	3	3,0	M	4	3,1	C	9	9,0	C	8	8,0	INTERGENIC
chr1A	82684762	G	A	G	1	1,0	G	7	7,0	G	2	2,0	R	16	14,2	INTERGENIC
chr1A	82684958	G	T	G	3	3,0	K	13	9,4	G	15	15,0	G	28	28,0	INTERGENIC
chr1A	82687467	C	T	Y	2	2,0	T	3	0,3	T	4	0,4	Y	7	2,5	INTERGENIC
chr1A	82952232	A	G	N	.	.	R	9	7,2	A	20	20,0	A	28	28,0	NON_SYNONYMOUS_CODING	gTc/gCc	TraesCS1A02G091300
chr1A	83822902	A	G	A	2	2,0	A	5	5,0	A	5	5,0	R	19	16,3	SYNONYMOUS_CODING	ccT/ccC	TraesCS1A02G091400
chr1A	83828465	A	C	N	.	.	A	5	5,0	M	6	4,2	A	10	10,0	NON_SYNONYMOUS_CODING	Tgc/Ggc	TraesCS1A02G091400
chr1A	85032854	C	T	N	.	.	C	2	2,0	Y	5	3,2	C	5	5,0	INTRON
chr1A	85577368	T	A	N	.	.	N	.	.	N	.	.	A	5	0,5	INTERGENIC
chr1A	85577508	C	T	N	.	.	N	.	.	N	.	.	T	5	0,5	INTERGENIC
chr1A	85577527	G	C	N	.	.	N	.	.	N	.	.	C	5	0,5	INTERGENIC
chr1A	85840375	T	C	N	.	.	T	1	1,0	N	.	.	Y	9	3,6	UNKNOWN
chr1A	86235597	T	C	T	3	3,0	Y	6	1,5	Y	29	27,2	Y	22	14,8	SYNONYMOUS_CODING	aaT/aaC	TraesCS1A02G093300
chr1A	86240008	C	G	C	17	17,0	C	10	10,0	C	13	13,0	S	19	16,3	NON_SYNONYMOUS_CODING	gaC/gaG	TraesCS1A02G093300
chr1A	86560516	T	C	N	.	.	T	2	2,0	N	.	.	Y	5	3,2	UPSTREAM
chr1A	86562398	G	T	N	.	.	G	2	2,0	K	1	0,1	G	12	12,0	INTRON
chr1A	86563994	A	G	R	2	0,2	A	5	5,0	A	6	6,0	A	8	8,0	INTRON
chr1A	86565698	A	G	R	6	3,3	A	6	6,0	A	8	8,0	A	5	5,0	INTRON
chr1A	86574826	C	T	T	3	0,3	T	1	0,1	T	2	0,2	T	3	0,3	INTERGENIC
chr1A	89439575	T	A	T	3	3,0	T	5	5,0	W	23	18,5	T	17	17,0	UNKNOWN
chr1A	89439584	A	C	A	2	2,0	A	8	8,0	M	16	13,3	A	13	13,0	UNKNOWN
chr1A	90161355	A	G	A	7	7,0	R	1	0,1	A	5	5,0	A	11	11,0	DOWNSTREAM
chr1A	90161776	T	C	T	12	12,0	T	2	2,0	T	18	17,1	Y	19	16,3	DOWNSTREAM
chr1A	90178833	A	G	A	5	5,0	R	8	6,2	A	6	6,0	A	18	18,0	UNKNOWN
chr1A	91041684	G	T	N	.	.	G	1	1,0	G	3	3,0	K	6	4,2	UPSTREAM
chr1A	91045057	T	G	T	2	2,0	T	5	5,0	T	7	7,0	K	14	10,4	INTRON
chr1A	91045261	T	C	T	4	4,0	T	12	12,0	Y	5	3,2	T	18	18,0	INTRON
chr1A	91053678	G	T	N	.	.	G	1	1,0	G	4	4,0	K	8	5,3	NON_SYNONYMOUS_CODING	Gtt/Ttt	TraesCS1A02G095200
chr1A	91054372	T	G	N	.	.	T	4	4,0	T	16	16,0	K	16	13,3	SYNONYMOUS_CODING	gtT/gtG	TraesCS1A02G095200
chr1A	91055888	A	C	M	3	1,2	A	4	4,0	A	8	8,0	A	11	11,0	NON_SYNONYMOUS_CODING	cAc/cCc	TraesCS1A02G095200
chr1A	91058621	G	T	K	4	1,3	G	8	8,0	G	4	4,0	G	10	10,0	UTR_3_PRIME
chr1A	91113050	G	T	G	2	2,0	G	1	1,0	K	10	8,2	G	7	7,0	UNKNOWN
chr1A	91501591	C	A	C	1	1,0	C	3	3,0	M	9	7,2	C	12	12,0	INTRON
chr1A	92571671	C	G	C	1	1,0	C	5	5,0	C	6	6,0	S	5	3,2	INTRON
chr1A	93397050	T	C	T	1	1,0	T	7	7,0	Y	8	7,1	Y	14	11,3	NON_SYNONYMOUS_CODING	Acg/Gcg	TraesCS1A02G097100
chr1A	93397108	C	T	N	.	.	C	7	7,0	Y	7	6,1	Y	15	12,3	SYNONYMOUS_CODING	ggG/ggA	TraesCS1A02G097100
chr1A	93401953	G	A	G	1	1,0	G	2	2,0	G	1	1,0	R	7	4,3	SYNONYMOUS_CODING	Cta/Tta	TraesCS1A02G097300
chr1A	94120071	C	A	C	1	1,0	M	14	6,8	C	2	2,0	C	24	24,0	UNKNOWN
chr1A	94120880	G	A	N	.	.	G	7	7,0	N	.	.	R	22	6,16	UNKNOWN
chr1A	94246315	T	C	T	2	2,0	T	6	6,0	Y	12	9,3	T	5	5,0	INTRON
chr1A	94248432	C	T	N	.	.	C	2	2,0	N	.	.	Y	5	3,2	INTRON
chr1A	94503969	G	C	G	16	16,0	G	4	4,0	G	15	15,0	S	15	11,4	UNKNOWN
chr1A	94504049	G	A	G	8	8,0	A	5	0,5	R	7	2,5	R	9	4,5	UNKNOWN
chr1A	94504064	C	T	C	9	9,0	C	5	5,0	C	10	10,0	Y	9	7,2	UNKNOWN
chr1A	95114773	C	A	N	.	.	N	.	.	N	.	.	M	5	2,3	INTERGENIC
chr1A	95184107	T	C	T	1	1,0	T	10	10,0	T	3	3,0	Y	8	5,3	INTRON
chr1A	95836785	G	A	G	1	1,0	N	.	.	R	4	2,2	R	9	7,2	UNKNOWN
chr1A	95836813	G	A	G	1	1,0	N	.	.	R	4	2,2	R	15	13,2	UNKNOWN
chr1A	95837457	G	C	N	.	.	G	2	2,0	S	6	4,2	G	7	7,0	UNKNOWN
chr1A	95838341	G	T	G	3	3,0	K	14	6,8	K	10	6,4	G	21	20,1	UNKNOWN
chr1A	95856391	A	G	A	4	4,0	R	10	7,3	A	19	19,0	A	14	14,0	SYNONYMOUS_CODING	cgT/cgC	TraesCS1A02G099500
chr1A	96139754	A	G	A	4	4,0	A	9	9,0	R	5	3,2	A	15	15,0	UNKNOWN
chr1A	96423645	A	G	G	1	0,1	N	.	.	G	5	0,5	G	3	0,3	SYNONYMOUS_CODING	ccA/ccG	TraesCS1A02G099800
chr1A	96423699	C	T	C	1	1,0	N	.	.	C	5	5,0	Y	3	2,1	SYNONYMOUS_CODING	cgC/cgT	TraesCS1A02G099800
chr1A	96423775	T	G	G	1	0,1	N	.	.	G	5	0,5	G	3	0,3	NON_SYNONYMOUS_CODING	Ttc/Gtc	TraesCS1A02G099800
chr1A	96446562	T	C	N	.	.	T	1	1,0	Y	3	1,2	T	10	10,0	SYNONYMOUS_CODING	ccT/ccC	TraesCS1A02G100000
chr1A	96451240	T	C	Y	7	3,4	T	2	2,0	T	27	27,0	T	12	12,0	NON_SYNONYMOUS_CODING	cTg/cCg	TraesCS1A02G100100
chr1A	96455223	A	T	T	5	0,5	N	.	.	W	5	4,1	W	4	3,1	DOWNSTREAM
chr1A	96459847	T	C	T	2	2,0	T	2	2,0	Y	9	7,2	T	11	11,0	UPSTREAM
chr1A	96461329	T	C	T	3	3,0	T	2	2,0	T	3	3,0	Y	8	6,2	UPSTREAM
chr1A	96465580	A	G	R	7	5,2	A	22	22,0	A	21	21,0	A	29	29,0	DOWNSTREAM
chr1A	96483899	G	A	G	5	5,0	G	3	3,0	G	6	6,0	R	8	4,4	NON_SYNONYMOUS_CODING	gCt/gTt	TraesCS1A02G100600
chr1A	97160679	G	A	A	3	0,3	G	10	10,0	G	22	21,1	R	43	25,18	DOWNSTREAM
chr1A	97161517	C	G	C	5	5,0	C	12	12,0	C	4	4,0	S	9	7,2	DOWNSTREAM
chr1A	97163066	T	C	T	3	3,0	T	11	11,0	T	14	13,1	Y	17	14,3	INTRON
chr1A	97163111	A	G	R	8	3,5	A	11	11,0	A	13	12,1	R	17	14,3	INTRON
chr1A	97646011	C	A	M	10	7,3	C	8	8,0	C	25	25,0	C	39	39,0	NON_SYNONYMOUS_CODING	atG/atT	TraesCS1A02G101000
chr1A	97646037	G	A	R	10	7,3	G	8	8,0	G	22	22,0	G	36	36,0	SYNONYMOUS_CODING	Ctg/Ttg	TraesCS1A02G101000
chr1A	97646352	G	A	A	3	0,3	G	11	11,0	G	32	32,0	R	29	22,7	SYNONYMOUS_CODING	ggC/ggT	TraesCS1A02G101000
chr1A	97798866	C	G	C	10	10,0	S	12	9,3	C	13	13,0	C	14	14,0	DOWNSTREAM
chr1A	97799077	C	T	C	10	9,1	C	10	10,0	Y	10	8,2	C	9	9,0	DOWNSTREAM
chr1A	97799225	G	A	G	6	6,0	R	6	4,2	G	6	6,0	G	6	6,0	DOWNSTREAM
chr1A	97801755	A	C	N	.	.	N	.	.	A	3	3,0	M	4	2,2	DOWNSTREAM
chr1A	97809541	T	C	C	13	0,13	Y	13	2,11	C	23	1,22	C	22	0,22	NON_SYNONYMOUS_CODING	cAc/cGc	TraesCS1A02G101300
chr1A	97809587	T	C	C	3	0,3	Y	5	2,3	C	15	1,14	C	6	0,6	NON_SYNONYMOUS_CODING	Aat/Gat	TraesCS1A02G101300
chr1A	98018545	C	A	C	4	4,0	C	11	11,0	M	9	7,2	C	24	24,0	UPSTREAM
chr1A	98244231	G	A	N	.	.	R	1	0,1	G	3	3,0	G	7	7,0	INTRON
chr1A	99101608	A	G	G	2	0,2	G	3	0,3	N	.	.	G	3	0,3	INTERGENIC
chr1A	99139832	T	C	T	9	9,0	T	2	2,0	T	11	11,0	Y	8	6,2	NON_SYNONYMOUS_CODING	Tac/Cac	TraesCS1A02G102900
chr1A	99235245	C	T	C	34	34,0	C	2	2,0	N	.	.	Y	9	7,2	UNKNOWN
chr1A	99627551	G	A	N	.	.	N	.	.	A	1	0,1	A	3	0,3	INTERGENIC
chr1A	99887066	A	G	N	.	.	N	.	.	N	.	.	G	7	0,7	INTERGENIC
chr1A	100202480	C	T	C	16	16,0	C	1	1,0	C	7	7,0	Y	7	5,2	INTERGENIC
chr1A	100202832	A	G	G	7	0,7	G	3	0,3	G	2	0,2	G	2	0,2	INTERGENIC
chr1A	100203482	G	A	G	12	12,0	A	2	0,2	A	11	0,11	R	6	4,2	INTERGENIC
chr1A	100295356	G	T	K	8	4,4	G	9	9,0	G	13	13,0	G	19	19,0	NON_SYNONYMOUS_CODING	cCt/cAt	TraesCS1A02G104700
chr1A	100297109	T	C	N	.	.	T	2	2,0	Y	6	4,2	T	8	8,0	UTR_5_PRIME
chr1A	101195874	T	C	T	1	1,0	T	1	1,0	T	3	3,0	Y	3	1,2	INTERGENIC
chr1A	101766011	G	A	A	2	0,2	N	.	.	N	.	.	A	4	0,4	INTRON
chr1A	101766799	C	T	N	.	.	N	.	.	C	4	4,0	Y	9	7,2	INTRON
chr1A	102364606	G	T	N	.	.	G	5	5,0	G	5	5,0	K	5	3,2	NON_SYNONYMOUS_CODING	gGa/gTa	TraesCS1A02G105800
chr1A	103311777	A	G	R	9	7,2	A	6	6,0	A	17	17,0	A	6	6,0	UTR_3_PRIME
chr1A	103315354	T	C	Y	1	0,1	T	2	2,0	N	.	.	T	9	9,0	INTRON
chr1A	103316413	A	T	N	.	.	A	3	3,0	W	1	0,1	A	10	10,0	INTRON
chr1A	104209441	G	T	N	.	.	G	2	2,0	G	8	8,0	K	22	18,4	NON_SYNONYMOUS_CODING	tGc/tTc	TraesCS1A02G106300
chr1A	104213035	G	T	N	.	.	G	5	5,0	K	7	5,2	G	8	8,0	NON_SYNONYMOUS_CODING	Gct/Tct	TraesCS1A02G106300
chr1A	104213604	G	C	G	1	1,0	N	.	.	G	2	2,0	S	14	11,3	NON_SYNONYMOUS_CODING	atG/atC	TraesCS1A02G106300
chr1A	104218736	T	A	W	12	10,2	T	2	2,0	T	9	9,0	T	19	19,0	NON_SYNONYMOUS_CODING	Tac/Aac	TraesCS1A02G106300
chr1A	104225665	A	G	N	.	.	G	2	0,2	G	4	0,4	G	6	0,6	UTR_5_PRIME
chr1A	104380292	A	G	A	16	16,0	A	14	14,0	A	9	9,0	R	25	21,4	DOWNSTREAM
chr1A	104942245	C	G	N	.	.	C	2	2,0	N	.	.	S	16	14,2	INTRON
chr1A	105281173	C	T	N	.	.	N	.	.	T	1	0,1	T	3	0,3	INTERGENIC
chr1A	105909079	G	A	G	3	3,0	R	12	9,3	G	11	11,0	G	31	31,0	UPSTREAM
chr1A	107095156	A	T	N	.	.	T	1	0,1	N	.	.	W	5	2,3	INTRON
chr1A	107095678	T	C	Y	5	3,2	T	4	4,0	T	5	5,0	T	9	9,0	INTRON
chr1A	107524089	C	T	C	10	10,0	C	10	10,0	C	25	23,2	Y	19	15,4	UNKNOWN
chr1A	107525945	C	T	T	5	0,5	T	19	0,19	T	18	1,17	Y	22	4,18	UNKNOWN
chr1A	107778489	C	A	C	2	2,0	N	.	.	M	3	1,2	C	13	13,0	NON_SYNONYMOUS_CODING	aaG/aaT	TraesCS1A02G108600
chr1A	107778769	C	A	C	3	3,0	C	1	1,0	C	2	2,0	M	13	11,2	NON_SYNONYMOUS_CODING	cGg/cTg	TraesCS1A02G108600
chr1A	107937314	C	T	N	.	.	T	4	0,4	T	1	0,1	Y	8	4,4	INTERGENIC
chr1A	107947630	C	T	Y	2	0,2	C	4	4,0	C	1	1,0	Y	3	2,1	INTERGENIC
chr1A	107948946	G	T	G	6	6,0	G	10	10,0	K	4	2,2	G	7	7,0	INTERGENIC
chr1A	107950539	G	T	K	5	3,2	G	3	3,0	G	2	2,0	G	6	6,0	INTERGENIC
chr1A	108073882	G	T	G	1	1,0	N	.	.	G	3	3,0	K	8	6,2	NON_SYNONYMOUS_CODING	aGa/aTa	TraesCS1A02G108800
chr1A	108310893	C	T	N	.	.	N	.	.	Y	5	3,2	C	8	8,0	INTERGENIC
chr1A	108311118	G	T	N	.	.	N	.	.	G	4	4,0	K	2	1,1	INTERGENIC
chr1A	108693968	C	A	C	6	6,0	C	19	19,0	C	12	12,0	M	16	13,3	SYNONYMOUS_CODING	ggG/ggT	TraesCS1A02G109300
chr1A	108695775	G	A	R	4	2,2	G	10	10,0	G	11	11,0	G	17	17,0	NON_SYNONYMOUS_CODING	gCa/gTa	TraesCS1A02G109300
chr1A	108697360	C	G	C	3	3,0	S	7	4,3	C	20	20,0	C	33	33,0	SYNONYMOUS_CODING	ctG/ctC	TraesCS1A02G109300
chr1A	108771069	C	T	C	2	2,0	T	3	0,3	C	10	10,0	C	17	17,0	NON_SYNONYMOUS_CODING	gCc/gTc	TraesCS1A02G109500
chr1A	108771736	G	A	R	5	3,2	G	7	7,0	G	7	7,0	G	21	21,0	NON_SYNONYMOUS_CODING	cGg/cAg	TraesCS1A02G109500
chr1A	108774767	T	C	T	11	11,0	T	19	19,0	T	15	15,0	Y	28	24,4	NON_SYNONYMOUS_CODING	aAg/aGg	TraesCS1A02G109600
chr1A	108923261	G	T	G	1	1,0	N	.	.	K	1	0,1	G	8	8,0	INTRON
chr1A	108924275	T	C	Y	3	2,1	T	4	4,0	T	9	9,0	T	17	17,0	UTR_3_PRIME
chr1A	109430183	T	C	Y	9	7,2	T	9	9,0	T	11	11,0	T	24	24,0	UPSTREAM
chr1A	109431437	G	A	G	1	1,0	R	14	9,5	G	8	7,1	R	9	6,3	UPSTREAM
chr1A	109431533	G	T	G	1	1,0	K	14	9,5	K	6	5,1	K	6	3,3	UPSTREAM
chr1A	109431604	T	C	T	1	1,0	N	.	.	N	.	.	Y	4	2,2	UPSTREAM
chr1A	109983979	G	A	R	4	2,2	N	.	.	G	5	5,0	G	7	7,0	INTRON
chr1A	110061773	G	A	G	2	2,0	N	.	.	G	2	2,0	R	3	1,2	UNKNOWN
chr1A	110062319	T	C	T	1	1,0	N	.	.	T	1	1,0	Y	5	1,4	UNKNOWN
chr1A	110062437	C	T	C	1	1,0	N	.	.	N	.	.	Y	5	1,4	UNKNOWN
chr1A	110062448	C	T	C	1	1,0	N	.	.	N	.	.	Y	5	1,4	UNKNOWN
chr1A	110279820	T	C	T	3	3,0	T	7	7,0	T	3	3,0	Y	9	7,2	NON_SYNONYMOUS_CODING	Tgc/Cgc	TraesCS1A02G110700
chr1A	110280400	T	C	N	.	.	Y	5	3,2	T	4	4,0	T	20	20,0	NON_SYNONYMOUS_CODING	cTa/cCa	TraesCS1A02G110700
chr1A	111125027	T	C	N	.	.	N	.	.	N	.	.	Y	9	3,6	INTRON
chr1A	111125907	C	G	C	4	4,0	S	11	8,3	C	10	10,0	C	24	24,0	INTRON
chr1A	111127917	A	T	A	1	1,0	W	1	0,1	A	2	2,0	W	14	11,3	INTRON
chr1A	111150851	C	T	Y	12	10,2	C	5	5,0	C	22	22,0	C	29	29,0	UTR_3_PRIME
chr1A	111152489	A	G	A	2	2,0	R	14	11,3	A	18	18,0	A	26	26,0	INTRON
chr1A	111152799	T	G	T	6	6,0	K	16	13,3	T	21	21,0	T	31	31,0	INTRON
chr1A	111788682	T	C	C	5	0,5	C	14	0,14	C	24	0,24	C	25	0,25	UNKNOWN
chr1A	111971443	A	G	R	2	0,2	A	1	1,0	A	7	7,0	A	9	9,0	UNKNOWN
chr1A	111976596	T	C	Y	6	3,3	T	31	31,0	T	24	24,0	T	17	17,0	UNKNOWN
chr1A	111981509	T	A	N	.	.	T	3	3,0	N	.	.	W	9	6,3	UNKNOWN
chr1A	111982860	A	G	N	.	.	A	3	3,0	A	3	3,0	R	8	6,2	UNKNOWN
chr1A	111986161	T	A	N	.	.	T	2	2,0	W	4	3,1	T	8	8,0	UNKNOWN
chr1A	111986587	T	C	N	.	.	T	2	2,0	T	2	2,0	Y	3	2,1	UNKNOWN
chr1A	111988007	T	C	N	.	.	T	4	4,0	Y	8	3,5	Y	16	9,7	UNKNOWN
chr1A	111988991	G	A	N	.	.	G	8	8,0	R	8	7,1	R	6	5,1	UNKNOWN
chr1A	111989680	T	C	N	.	.	T	6	6,0	T	6	6,0	Y	5	2,3	UNKNOWN
chr1A	112201382	T	C	T	8	8,0	Y	8	5,3	T	11	10,1	T	33	33,0	UNKNOWN
chr1A	112582947	C	A	A	1	0,1	A	3	0,3	N	.	.	A	2	0,2	INTERGENIC
chr1A	112939044	T	C	T	1	1,0	T	4	4,0	Y	4	2,2	Y	7	6,1	INTRON
chr1A	113859074	C	T	Y	7	5,2	C	21	21,0	C	29	29,0	C	23	23,0	NON_SYNONYMOUS_CODING	Ggc/Agc	TraesCS1A02G112100
chr1A	113860349	G	A	A	8	0,8	A	8	0,8	A	23	0,23	A	49	0,49	SYNONYMOUS_CODING	ttC/ttT	TraesCS1A02G112100
chr1A	113878276	C	A	C	14	14,0	C	6	6,0	M	10	8,2	C	6	6,0	NON_SYNONYMOUS_CODING	aaG/aaT	TraesCS1A02G112200
chr1A	113878500	G	T	G	8	8,0	G	5	5,0	G	9	9,0	K	10	7,3	NON_SYNONYMOUS_CODING	Caa/Aaa	TraesCS1A02G112200
chr1A	113878678	A	G	A	7	7,0	A	4	4,0	A	6	6,0	R	24	20,4	SYNONYMOUS_CODING	acT/acC	TraesCS1A02G112200
chr1A	114060475	A	G	A	5	5,0	A	8	8,0	R	12	9,3	A	44	43,1	DOWNSTREAM
chr1A	114546124	C	T	T	21	0,21	T	5	0,5	T	33	0,33	T	27	0,27	INTRON
chr1A	114548672	T	C	N	.	.	T	2	2,0	T	2	2,0	Y	5	1,4	INTRON
chr1A	114552182	G	T	G	7	7,0	K	7	5,2	G	10	10,0	G	16	16,0	UTR_3_PRIME
chr1A	115361713	T	C	C	2	0,2	N	.	.	C	1	0,1	C	3	0,3	INTRON
chr1A	115563387	C	A	M	1	0,1	N	.	.	C	2	2,0	C	7	7,0	UNKNOWN
chr1A	115975803	A	G	A	2	2,0	A	8	8,0	A	4	4,0	R	8	6,2	UTR_5_PRIME
chr1A	116699901	T	G	T	1	1,0	T	6	6,0	T	5	5,0	K	8	6,2	DOWNSTREAM
chr1A	116699968	C	G	C	2	2,0	C	6	6,0	C	12	12,0	S	9	7,2	DOWNSTREAM
chr1A	117196462	C	G	N	.	.	S	7	4,3	C	12	12,0	C	11	11,0	NON_SYNONYMOUS_CODING	Gag/Cag	TraesCS1A02G113700
chr1A	117197885	C	T	C	1	1,0	C	4	4,0	C	5	5,0	Y	8	6,2	NON_SYNONYMOUS_CODING	Gta/Ata	TraesCS1A02G113700
chr1A	117198001	T	C	T	1	1,0	Y	15	12,3	T	15	15,0	T	35	35,0	NON_SYNONYMOUS_CODING	cAa/cGa	TraesCS1A02G113700
chr1A	117906951	C	A	C	5	5,0	C	8	8,0	C	7	7,0	M	8	6,2	UTR_3_PRIME
chr1A	118558100	T	C	C	3	0,3	C	5	0,5	C	10	0,10	C	11	0,11	INTRON
chr1A	118558814	G	A	N	.	.	A	1	0,1	A	9	0,9	A	7	0,7	INTRON
chr1A	118559664	G	A	N	.	.	G	3	3,0	G	3	3,0	R	9	7,2	UPSTREAM
chr1A	118809778	G	T	N	.	.	K	1	0,1	G	7	7,0	G	7	7,0	INTRON
chr1A	118811735	G	T	G	5	5,0	K	6	3,3	G	8	8,0	G	11	11,0	NON_SYNONYMOUS_CODING	Gcg/Tcg	TraesCS1A02G114600
chr1A	118812907	C	A	C	5	5,0	C	12	12,0	M	16	13,3	C	6	6,0	NON_SYNONYMOUS_CODING	aCt/aAt	TraesCS1A02G114600
chr1A	118812984	G	T	K	9	7,2	G	8	8,0	G	13	13,0	G	7	7,0	STOP_GAINED	Gag/Tag	TraesCS1A02G114600
chr1A	118814303	A	G	A	12	12,0	R	6	4,2	A	11	11,0	A	20	20,0	SYNONYMOUS_CODING	ggA/ggG	TraesCS1A02G114600
chr1A	119987903	G	A	A	5	0,5	G	7	7,0	R	20	17,3	R	14	9,5	INTERGENIC
chr1A	120010176	C	T	C	9	9,0	Y	8	6,2	C	7	7,0	C	15	15,0	STOP_GAINED	Cag/Tag	TraesCS1A02G115500
chr1A	120364480	A	G	A	5	5,0	A	3	3,0	A	5	5,0	R	7	5,2	INTRON
chr1A	121470652	T	C	T	3	3,0	T	17	17,0	T	13	13,0	Y	8	6,2	UNKNOWN
chr1A	121741579	G	A	N	.	.	G	3	3,0	G	4	4,0	R	4	1,3	SYNONYMOUS_CODING	caC/caT	TraesCS1A02G116200
chr1A	121743770	A	C	N	.	.	M	1	0,1	A	2	2,0	A	8	8,0	NON_SYNONYMOUS_CODING	Tat/Gat	TraesCS1A02G116200
chr1A	121880378	G	T	G	2	2,0	G	8	8,0	G	11	11,0	K	11	7,4	NON_SYNONYMOUS_CODING	Ctt/Att	TraesCS1A02G116300
chr1A	122133002	C	T	N	.	.	N	.	.	C	4	4,0	Y	3	2,1	INTERGENIC
chr1A	123551848	C	A	N	.	.	M	6	4,2	C	11	11,0	C	18	18,0	NON_SYNONYMOUS_CODING	Gca/Tca	TraesCS1A02G116500
chr1A	124017841	C	A	C	3	3,0	C	6	6,0	C	3	3,0	M	9	7,2	UPSTREAM
chr1A	124786821	A	G	N	.	.	A	6	6,0	A	2	2,0	R	2	1,1	UTR_3_PRIME
chr1A	126730733	A	G	A	4	4,0	A	3	3,0	R	8	6,2	A	6	6,0	INTERGENIC
chr1A	127353561	G	T	K	8	6,2	G	11	11,0	G	10	10,0	G	49	49,0	INTRON
chr1A	127353920	C	T	N	.	.	N	.	.	C	4	4,0	Y	11	8,3	INTRON
chr1A	128624686	A	G	R	12	9,3	A	1	1,0	A	7	7,0	A	11	11,0	INTERGENIC
chr1A	128624875	G	A	G	12	12,0	N	.	.	R	9	7,2	G	7	7,0	INTERGENIC
chr1A	129703715	T	G	N	.	.	G	2	0,2	G	2	0,2	K	6	4,2	UNKNOWN
chr1A	129705506	A	T	N	.	.	A	1	1,0	A	2	2,0	W	9	7,2	UNKNOWN
chr1A	129727690	A	G	N	.	.	N	.	.	N	.	.	R	6	4,2	DOWNSTREAM
chr1A	129995869	T	C	T	4	4,0	Y	10	8,2	T	9	9,0	T	9	9,0	UNKNOWN
chr1A	129996440	C	A	C	7	7,0	M	14	10,4	C	21	21,0	C	21	21,0	UNKNOWN
chr1A	129997792	T	A	N	.	.	W	6	2,4	T	4	4,0	T	19	19,0	UNKNOWN
chr1A	130479758	A	G	G	2	0,2	G	1	0,1	G	3	0,3	G	5	0,5	UNKNOWN
chr1A	131519900	C	T	T	4	0,4	C	7	7,0	C	5	5,0	C	9	9,0	DOWNSTREAM
chr1A	132270179	G	A	G	1	1,0	G	7	7,0	N	.	.	R	8	6,2	NON_SYNONYMOUS_CODING	Gtc/Atc	TraesCS1A02G119900
chr1A	132270988	A	G	N	.	.	N	.	.	N	.	.	R	6	4,2	NON_SYNONYMOUS_CODING	cAa/cGa	TraesCS1A02G119900
chr1A	132415069	C	A	C	1	1,0	C	22	22,0	M	23	19,4	C	37	37,0	NON_SYNONYMOUS_CODING	gGc/gTc	TraesCS1A02G120000
chr1A	132484377	C	A	N	.	.	M	17	11,6	C	27	27,0	C	30	30,0	STOP_GAINED	tCa/tAa	TraesCS1A02G120100
chr1A	132798269	A	G	A	1	1,0	N	.	.	G	2	0,2	R	5	4,1	NON_SYNONYMOUS_CODING	gTa/gCa	TraesCS1A02G120400
chr1A	134960540	G	A	N	.	.	R	3	2,1	G	4	4,0	G	8	8,0	INTRON
chr1A	135182756	C	A	C	3	3,0	M	13	11,2	C	20	20,0	C	32	32,0	NON_SYNONYMOUS_CODING	aaG/aaT	TraesCS1A02G121500
chr1A	135445016	T	C	T	2	2,0	T	7	7,0	Y	7	5,2	T	7	7,0	INTERGENIC
chr1A	135446269	T	C	Y	8	6,2	T	5	5,0	T	3	3,0	T	6	6,0	INTERGENIC
chr1A	135447051	T	C	C	5	0,5	C	1	0,1	C	2	0,2	C	1	0,1	INTERGENIC
chr1A	135515653	A	G	A	1	1,0	A	5	5,0	R	5	3,2	A	11	11,0	INTRON
chr1A	135967421	C	T	N	.	.	N	.	.	Y	10	8,2	C	48	48,0	NON_SYNONYMOUS_CODING	Gct/Act	TraesCS1A02G121800
chr1A	135968216	G	T	G	1	1,0	G	2	2,0	K	5	3,2	G	46	46,0	NON_SYNONYMOUS_CODING	Ctg/Atg	TraesCS1A02G121800
chr1A	136933121	T	C	N	.	.	T	2	2,0	Y	7	5,2	T	5	5,0	SYNONYMOUS_CODING	ccT/ccC	TraesCS1A02G122100
chr1A	136933386	T	C	T	1	1,0	T	2	2,0	Y	9	7,2	T	11	11,0	NON_SYNONYMOUS_CODING	tTa/tCa	TraesCS1A02G122100
chr1A	136950603	A	G	A	1	1,0	R	3	2,1	A	8	8,0	A	11	11,0	INTRON
chr1A	136952845	A	C	N	.	.	C	5	0,5	C	10	0,10	C	42	0,42	INTRON
chr1A	136953649	A	G	A	2	2,0	A	14	14,0	R	20	17,3	R	25	21,4	NON_SYNONYMOUS_CODING	cAa/cGa	TraesCS1A02G122100
chr1A	137231414	G	T	N	.	.	N	.	.	G	1	1,0	K	6	4,2	UPSTREAM
chr1A	137406804	G	A	G	1	1,0	G	2	2,0	G	2	2,0	R	10	7,3	INTRON
chr1A	137856522	T	C	T	9	9,0	Y	20	17,3	T	18	18,0	T	20	20,0	UNKNOWN
chr1A	137857218	G	A	G	4	4,0	G	2	2,0	G	5	5,0	R	14	11,3	UNKNOWN
chr1A	137857250	A	G	R	4	3,1	A	2	2,0	A	4	4,0	A	11	11,0	UNKNOWN
chr1A	137859481	C	G	C	1	1,0	S	7	3,4	C	16	16,0	C	28	28,0	UNKNOWN
chr1A	137928628	T	G	T	1	1,0	K	3	1,2	T	18	18,0	T	17	17,0	UNKNOWN
chr1A	137928642	G	A	G	1	1,0	R	3	1,2	G	12	12,0	G	20	20,0	UNKNOWN
chr1A	137936418	T	C	T	3	3,0	T	2	2,0	T	5	5,0	Y	6	4,2	INTERGENIC
chr1A	137938935	A	G	A	1	1,0	A	2	2,0	A	5	5,0	R	6	4,2	INTERGENIC
chr1A	137939307	T	C	T	2	2,0	N	.	.	Y	3	1,2	T	9	9,0	INTERGENIC
chr1A	138258874	G	A	G	2	2,0	R	16	9,7	G	29	28,1	R	26	20,6	UNKNOWN
chr1A	138258896	T	C	T	2	2,0	Y	20	16,4	T	32	32,0	T	42	42,0	UNKNOWN
chr1A	138262509	C	A	A	1	0,1	M	4	1,3	A	4	0,4	A	9	0,9	UNKNOWN
chr1A	138262573	C	G	C	2	2,0	C	5	5,0	S	8	7,1	S	16	12,4	UNKNOWN
chr1A	138267876	G	A	G	3	3,0	G	13	12,1	R	5	3,2	G	16	14,2	UNKNOWN
chr1A	138321559	G	A	G	1	1,0	R	9	4,5	G	5	5,0	G	9	9,0	UNKNOWN
chr1A	138322628	C	T	N	.	.	C	2	2,0	C	7	7,0	Y	10	8,2	UNKNOWN
chr1A	139553968	C	G	C	2	2,0	N	.	.	C	1	1,0	S	3	1,2	NON_SYNONYMOUS_CODING	aCg/aGg	TraesCS1A02G122600
chr1A	139636953	A	G	A	5	5,0	A	2	2,0	A	4	4,0	R	7	5,2	DOWNSTREAM
chr1A	139637736	T	C	Y	7	5,2	T	20	20,0	T	32	30,2	T	27	27,0	SYNONYMOUS_CODING	ggA/ggG	TraesCS1A02G122800
chr1A	139641126	C	T	C	1	1,0	C	3	3,0	Y	6	4,2	C	15	15,0	UPSTREAM
chr1A	140369260	A	G	A	7	7,0	R	14	11,3	A	12	12,0	A	11	11,0	UNKNOWN
chr1A	140369592	C	T	C	6	6,0	C	8	8,0	C	10	10,0	Y	6	4,2	UNKNOWN
chr1A	140370959	T	C	T	3	3,0	Y	4	3,1	T	13	13,0	T	21	21,0	UNKNOWN
chr1A	140371187	A	G	A	3	3,0	A	5	5,0	A	6	6,0	R	14	12,2	UNKNOWN
chr1A	143270656	C	T	C	2	2,0	C	1	1,0	C	7	7,0	Y	7	5,2	INTERGENIC
chr1A	143810369	G	A	G	4	4,0	R	3	1,2	G	4	4,0	G	14	14,0	SYNONYMOUS_CODING	ccG/ccA	TraesCS1A02G123600
chr1A	143819007	G	C	G	1	1,0	N	.	.	S	3	1,2	G	13	13,0	UTR_3_PRIME
chr1A	145372162	A	G	N	.	.	A	2	2,0	A	3	3,0	R	8	5,3	INTRON
chr1A	145372385	A	G	A	1	1,0	A	2	2,0	R	4	1,3	A	12	12,0	INTRON
chr1A	145887014	G	T	G	5	5,0	K	9	7,2	G	10	10,0	G	25	25,0	UNKNOWN
chr1A	145890542	G	T	K	6	4,2	G	6	6,0	G	4	4,0	G	8	8,0	UNKNOWN
chr1A	145989467	G	A	A	8	0,8	A	14	0,14	A	15	0,15	A	13	0,13	UTR_3_PRIME
chr1A	146608783	A	G	G	2	0,2	G	5	0,5	N	.	.	G	1	0,1	UNKNOWN
chr1A	146631028	G	A	R	11	8,3	G	6	6,0	G	13	13,0	G	8	8,0	SYNONYMOUS_CODING	gaC/gaT	TraesCS1A02G124200
chr1A	146633699	C	G	N	.	.	C	2	2,0	S	3	2,1	C	5	5,0	INTRON
chr1A	146949113	A	G	G	6	0,6	A	16	16,0	A	2	2,0	R	21	13,8	INTRON
chr1A	146950334	T	C	Y	3	2,1	T	6	6,0	T	4	4,0	T	13	13,0	INTRON
chr1A	147354685	C	T	N	.	.	T	1	0,1	T	4	0,4	T	1	0,1	INTRON
chr1A	147908651	A	G	A	9	9,0	R	9	7,2	A	22	22,0	A	31	31,0	UNKNOWN
chr1A	147909530	A	G	A	3	3,0	A	6	6,0	R	15	13,2	A	19	19,0	UNKNOWN
chr1A	148263712	T	A	T	7	7,0	W	11	8,3	T	7	7,0	T	13	13,0	UPSTREAM
chr1A	148267194	C	G	C	4	4,0	S	8	3,5	C	19	19,0	C	31	31,0	UTR_5_PRIME
chr1A	148603431	T	C	N	.	.	T	3	3,0	Y	4	2,2	T	15	15,0	UNKNOWN
chr1A	149354781	T	A	N	.	.	T	1	1,0	T	7	7,0	W	19	15,4	NON_SYNONYMOUS_CODING	aAc/aTc	TraesCS1A02G125400
chr1A	149355312	C	T	N	.	.	T	5	0,5	T	4	0,4	T	8	0,8	NON_SYNONYMOUS_CODING	gGa/gAa	TraesCS1A02G125400
chr1A	149513356	C	A	C	4	4,0	C	9	9,0	C	5	5,0	M	10	8,2	SYNONYMOUS_CODING	tcG/tcT	TraesCS1A02G125500
chr1A	149868261	C	T	C	3	3,0	Y	11	8,3	C	7	7,0	C	9	9,0	SYNONYMOUS_CODING	ctC/ctT	TraesCS1A02G125600
chr1A	150007472	C	T	Y	2	0,2	C	5	5,0	Y	12	11,1	Y	13	11,2	SYNONYMOUS_CODING	tgC/tgT	TraesCS1A02G125700
chr1A	150860986	C	T	C	8	8,0	T	10	0,10	Y	13	2,11	Y	5	1,4	NON_SYNONYMOUS_CODING	Cgc/Tgc	TraesCS1A02G125900
chr1A	150894732	C	G	C	14	14,0	C	17	17,0	C	16	16,0	S	19	16,3	NON_SYNONYMOUS_CODING	Ctc/Gtc	TraesCS1A02G126000
chr1A	151771219	C	T	C	1	1,0	Y	8	7,1	Y	6	4,2	Y	12	9,3	UTR_5_PRIME
chr1A	153186764	C	A	N	.	.	N	.	.	M	1	0,1	C	9	9,0	INTERGENIC
chr1A	153377293	G	T	N	.	.	G	7	7,0	G	9	9,0	K	6	4,2	UNKNOWN
chr1A	153582260	T	C	Y	3	1,2	T	1	1,0	T	1	1,0	T	11	11,0	INTRON
chr1A	155079024	G	C	G	7	7,0	S	16	12,4	G	10	10,0	G	18	18,0	DOWNSTREAM
chr1A	157311992	A	C	C	7	0,7	C	21	0,21	C	19	0,19	C	28	0,28	UTR_3_PRIME
chr1A	157355466	T	C	Y	7	5,2	T	8	8,0	T	21	21,0	T	9	9,0	UNKNOWN
chr1A	159524043	T	C	N	.	.	C	9	0,9	C	4	0,4	C	2	0,2	INTRON
chr1A	159524917	A	G	N	.	.	A	3	3,0	A	5	5,0	R	3	2,1	INTRON
chr1A	159525203	G	T	G	1	1,0	G	5	5,0	K	9	6,3	G	8	8,0	INTRON
chr1A	159525659	A	C	C	8	0,8	C	8	0,8	C	13	0,13	C	2	0,2	INTRON
chr1A	160685377	C	T	N	.	.	T	3	0,3	N	.	.	T	7	0,7	INTERGENIC
chr1A	161677075	A	C	M	1	0,1	A	4	4,0	A	1	1,0	M	6	4,2	UNKNOWN
chr1A	162651551	C	T	C	4	4,0	C	4	4,0	C	2	2,0	Y	4	3,1	UNKNOWN
chr1A	162652257	C	A	M	6	4,2	C	12	12,0	C	16	16,0	C	17	17,0	UNKNOWN
chr1A	162879216	A	G	A	3	3,0	A	2	2,0	R	7	4,3	A	5	5,0	UNKNOWN
chr1A	162879572	C	T	T	5	0,5	N	.	.	T	1	0,1	T	7	0,7	UNKNOWN
chr1A	163397289	C	A	N	.	.	C	11	11,0	C	2	2,0	M	9	7,2	UTR_5_PRIME
chr1A	163622695	C	G	S	2	0,2	C	12	12,0	C	28	26,2	S	39	31,8	UNKNOWN
chr1A	164167825	G	A	G	2	2,0	G	10	10,0	R	4	2,2	G	6	6,0	UNKNOWN
chr1A	164168916	G	T	T	1	0,1	T	2	0,2	T	1	0,1	T	3	0,3	UNKNOWN
chr1A	165554471	G	T	G	3	3,0	K	8	5,3	G	8	8,0	G	9	9,0	UNKNOWN
chr1A	165555765	T	A	T	4	4,0	T	6	6,0	W	9	7,2	T	17	17,0	UNKNOWN
chr1A	165556168	T	C	T	2	2,0	T	5	5,0	N	.	.	Y	4	2,2	UNKNOWN
chr1A	167158423	A	G	N	.	.	N	.	.	G	1	0,1	G	4	0,4	INTERGENIC
chr1A	167177001	T	C	N	.	.	N	.	.	N	.	.	Y	6	2,4	INTERGENIC
chr1A	167803805	C	A	C	2	2,0	C	2	2,0	C	2	2,0	M	8	6,2	INTRON
chr1A	167804679	C	A	M	4	2,2	C	11	11,0	C	16	16,0	C	20	20,0	NON_SYNONYMOUS_CODING	gaG/gaT	TraesCS1A02G129800
chr1A	167804766	A	G	A	4	4,0	R	8	6,2	A	11	11,0	A	19	19,0	SYNONYMOUS_CODING	ccT/ccC	TraesCS1A02G129800
chr1A	168548746	T	C	T	7	7,0	T	21	21,0	T	25	25,0	Y	29	24,5	SYNONYMOUS_CODING	gaT/gaC	TraesCS1A02G130600
chr1A	168550710	C	T	N	.	.	T	11	0,11	T	17	1,16	T	36	0,36	DOWNSTREAM
chr1A	168589113	A	T	N	.	.	N	.	.	T	2	0,2	W	4	2,2	NON_SYNONYMOUS_CODING	aaT/aaA	TraesCS1A02G130700
chr1A	168737422	T	G	T	1	1,0	T	1	1,0	K	7	5,2	T	5	5,0	UNKNOWN
chr1A	169654019	C	A	C	2	2,0	C	6	6,0	C	12	12,0	M	17	13,4	UTR_3_PRIME
chr1A	171019175	C	T	Y	4	3,1	C	11	11,0	Y	18	11,7	C	33	31,2	SYNONYMOUS_CODING	agG/agA	TraesCS1A02G130900
chr1A	171019330	A	T	W	9	5,4	W	8	7,1	W	18	13,5	W	36	29,7	NON_SYNONYMOUS_CODING	Ttg/Atg	TraesCS1A02G130900
chr1A	171019684	C	A	M	6	4,2	C	9	9,0	C	25	25,0	C	27	27,0	SYNONYMOUS_CODING	ccG/ccT	TraesCS1A02G130900
chr1A	171026972	C	T	N	.	.	N	.	.	N	.	.	T	6	0,6	INTRON
chr1A	171460726	A	C	A	2	2,0	A	2	2,0	M	9	7,2	A	6	6,0	INTRON
chr1A	172186477	C	T	C	8	8,0	C	8	8,0	Y	14	12,2	C	30	30,0	INTRON
chr1A	172190049	A	G	A	4	4,0	A	2	2,0	R	1	0,1	A	13	13,0	INTRON
chr1A	172191561	G	T	K	2	0,2	G	3	3,0	N	.	.	G	12	12,0	INTRON
chr1A	172192082	C	T	Y	4	2,2	C	5	5,0	C	8	8,0	C	11	11,0	INTRON
chr1A	173779066	G	A	R	8	5,3	G	6	6,0	G	5	5,0	G	12	12,0	UNKNOWN
chr1A	173960987	T	C	Y	1	0,1	T	4	4,0	Y	6	4,2	Y	2	1,1	INTRON
chr1A	173961455	C	T	Y	1	0,1	C	1	1,0	Y	6	3,3	Y	4	2,2	INTRON
chr1A	173962436	A	T	A	1	1,0	A	2	2,0	W	2	1,1	W	14	12,2	INTRON
chr1A	173973730	C	T	N	.	.	T	1	0,1	T	1	0,1	T	2	0,2	INTRON
chr1A	173973740	C	T	N	.	.	T	1	0,1	T	1	0,1	T	2	0,2	INTRON
chr1A	173983206	A	C	M	10	8,2	A	11	11,0	A	10	10,0	A	8	8,0	DOWNSTREAM
chr1A	175177226	C	T	N	.	.	C	8	8,0	N	.	.	Y	5	3,2	INTRON
chr1A	176457828	A	G	R	2	0,2	A	7	7,0	A	22	22,0	A	31	31,0	SYNONYMOUS_CODING	acA/acG	TraesCS1A02G131600
chr1A	176458043	A	G	A	5	5,0	A	5	5,0	A	18	18,0	R	19	16,3	NON_SYNONYMOUS_CODING	cAg/cGg	TraesCS1A02G131600
chr1A	176461687	G	T	G	12	12,0	G	17	17,0	K	25	21,4	G	41	41,0	NON_SYNONYMOUS_CODING	Ggc/Tgc	TraesCS1A02G131600
chr1A	176461959	A	G	A	10	10,0	A	19	19,0	A	17	17,0	R	38	32,6	NON_SYNONYMOUS_CODING	aAc/aGc	TraesCS1A02G131600
chr1A	176462244	T	C	T	4	4,0	T	13	13,0	T	17	17,0	Y	16	11,5	INTRON
chr1A	177467813	G	T	K	3	2,1	G	6	6,0	G	7	7,0	G	9	9,0	INTRON
chr1A	177477211	A	G	A	1	1,0	A	3	3,0	R	7	1,6	A	6	6,0	DOWNSTREAM
chr1A	177479749	G	A	G	2	2,0	R	1	0,1	G	1	1,0	R	5	2,3	UPSTREAM
chr1A	177481344	A	G	A	28	28,0	N	.	.	R	16	11,5	A	38	36,2	UPSTREAM
chr1A	177482266	T	C	T	38	38,0	C	3	0,3	T	7	7,0	T	30	30,0	UPSTREAM
chr1A	177482654	T	G	K	7	5,2	N	.	.	T	1	1,0	T	7	7,0	UPSTREAM
chr1A	180419912	A	G	N	.	.	G	2	0,2	N	.	.	G	3	0,3	UPSTREAM
chr1A	180423001	C	T	N	.	.	T	4	0,4	N	.	.	T	4	0,4	INTERGENIC
chr1A	180424212	G	T	N	.	.	G	2	2,0	G	2	2,0	K	3	1,2	INTERGENIC
chr1A	181763948	C	T	N	.	.	C	4	4,0	C	1	1,0	Y	5	3,2	INTRON
chr1A	181764137	G	T	N	.	.	G	4	4,0	N	.	.	K	5	3,2	INTRON
chr1A	181769220	T	C	T	3	3,0	T	6	6,0	Y	10	8,2	T	13	13,0	INTRON
chr1A	185521311	T	C	T	1	1,0	N	.	.	T	4	4,0	Y	4	2,2	UNKNOWN
chr1A	185521620	C	T	C	2	2,0	C	5	5,0	C	6	6,0	Y	8	6,2	UNKNOWN
chr1A	185522250	A	G	A	3	3,0	A	10	10,0	A	4	4,0	R	8	6,2	UNKNOWN
chr1A	185846554	T	C	T	9	9,0	Y	8	6,2	T	20	19,1	T	17	17,0	UNKNOWN
chr1A	186715524	C	T	C	2	2,0	C	2	2,0	C	5	5,0	Y	8	5,3	DOWNSTREAM
chr1A	186715935	G	A	N	.	.	G	1	1,0	N	.	.	R	7	5,2	DOWNSTREAM
chr1A	186717302	C	T	N	.	.	C	5	5,0	Y	10	7,3	C	6	6,0	DOWNSTREAM
chr1A	186740112	A	T	A	4	4,0	A	4	4,0	N	.	.	W	5	1,4	INTERGENIC
chr1A	186740707	C	T	N	.	.	N	.	.	Y	3	2,1	T	11	0,11	INTERGENIC
chr1A	186989051	A	G	A	1	1,0	A	2	2,0	R	7	4,3	A	7	7,0	UTR_3_PRIME
chr1A	186992654	A	G	A	1	1,0	A	6	6,0	A	16	16,0	R	14	12,2	INTRON
chr1A	188146881	C	G	N	.	.	C	1	1,0	S	1	0,1	C	7	7,0	INTRON
chr1A	188148391	C	G	S	5	3,2	C	14	14,0	C	14	14,0	C	51	51,0	INTRON
chr1A	188148781	C	A	C	3	3,0	M	7	5,2	C	6	6,0	C	10	10,0	INTRON
chr1A	188149790	A	G	A	6	6,0	A	14	14,0	R	14	10,4	A	26	26,0	INTRON
chr1A	188150139	G	A	R	8	6,2	G	10	10,0	G	7	7,0	G	10	10,0	INTRON
chr1A	188224340	C	T	C	4	4,0	Y	4	2,2	C	8	8,0	C	8	8,0	UNKNOWN
chr1A	188226280	A	G	A	1	1,0	A	11	11,0	R	10	8,2	A	14	14,0	UNKNOWN
chr1A	189962592	G	T	G	1	1,0	K	3	1,2	G	4	4,0	G	6	6,0	INTRON
chr1A	191856553	G	A	G	2	2,0	G	5	5,0	G	7	7,0	R	8	6,2	SYNONYMOUS_CODING	Cta/Tta	TraesCS1A02G133900
chr1A	191862312	A	T	A	2	2,0	A	3	3,0	N	.	.	W	7	5,2	NON_SYNONYMOUS_CODING	Tcc/Acc	TraesCS1A02G133900
chr1A	197092564	C	T	N	.	.	T	1	0,1	T	2	0,2	T	2	0,2	SYNONYMOUS_CODING	ctG/ctA	TraesCS1A02G134100
chr1A	197092707	G	A	N	.	.	A	3	0,3	A	2	0,2	A	2	0,2	SYNONYMOUS_CODING	gcC/gcT	TraesCS1A02G134100
chr1A	203324793	A	C	N	.	.	M	9	7,2	A	25	25,0	A	27	27,0	UNKNOWN
chr1A	203807278	C	A	C	3	3,0	M	10	8,2	C	2	2,0	C	4	4,0	UNKNOWN
chr1A	203807393	A	T	W	8	6,2	A	23	21,2	A	22	22,0	A	41	41,0	UNKNOWN
chr1A	203810911	C	T	C	1	1,0	C	8	8,0	Y	5	3,2	C	12	12,0	UNKNOWN
chr1A	203815018	G	C	G	1	1,0	G	5	5,0	G	6	6,0	S	6	4,2	UNKNOWN
chr1A	203822221	C	T	C	1	1,0	Y	2	1,1	Y	8	6,2	C	8	8,0	UNKNOWN
chr1A	205525133	C	T	C	1	1,0	C	1	1,0	C	3	3,0	Y	5	3,2	UNKNOWN
chr1A	205526980	T	C	C	1	0,1	N	.	.	C	5	0,5	C	1	0,1	UNKNOWN
chr1A	206172382	G	A	G	7	7,0	G	5	5,0	R	3	2,1	G	24	24,0	UNKNOWN
chr1A	206800094	G	T	N	.	.	K	5	2,3	G	8	8,0	G	14	14,0	NON_SYNONYMOUS_CODING	cCa/cAa	TraesCS1A02G135100
chr1A	206803428	T	G	N	.	.	N	.	.	G	8	0,8	G	5	0,5	NON_SYNONYMOUS_CODING	gAa/gCa	TraesCS1A02G135100
chr1A	208128574	C	G	N	.	.	N	.	.	N	.	.	S	5	3,2	INTERGENIC
chr1A	208128614	G	T	N	.	.	N	.	.	N	.	.	K	5	2,3	INTERGENIC
chr1A	208216970	T	C	N	.	.	T	7	7,0	Y	7	5,2	T	18	18,0	INTRON
chr1A	208217647	A	G	N	.	.	A	5	5,0	A	7	7,0	R	8	6,2	INTRON
chr1A	208217776	T	G	N	.	.	N	.	.	K	8	6,2	T	9	9,0	INTRON
chr1A	208708695	A	G	N	.	.	N	.	.	N	.	.	R	7	5,2	INTERGENIC
chr1A	208714487	T	C	T	4	4,0	T	1	1,0	N	.	.	Y	5	4,1	UNKNOWN
chr1A	208881457	C	A	C	4	4,0	C	11	11,0	M	16	13,3	C	33	31,2	SPLICE_SITE_REGION
chr1A	208905304	G	T	G	2	2,0	G	1	1,0	K	4	1,3	G	7	7,0	INTRON
chr1A	208905866	T	C	T	6	6,0	Y	4	3,1	T	9	9,0	T	14	14,0	INTRON
chr1A	208907518	G	T	N	.	.	G	3	3,0	G	6	6,0	K	15	13,2	INTRON
chr1A	208907845	G	A	N	.	.	R	9	7,2	G	3	3,0	G	8	8,0	INTRON
chr1A	208909694	G	C	G	1	1,0	S	5	3,2	G	7	7,0	G	17	17,0	INTRON
chr1A	208913660	C	A	C	9	9,0	C	8	8,0	C	6	6,0	M	18	15,3	DOWNSTREAM
chr1A	208913692	G	A	G	8	8,0	G	6	6,0	G	3	3,0	R	16	14,2	DOWNSTREAM
chr1A	208914336	G	A	G	1	1,0	G	4	4,0	R	10	8,2	G	9	9,0	DOWNSTREAM
chr1A	209355887	T	A	N	.	.	T	2	2,0	T	2	2,0	W	4	2,2	INTRON
chr1A	213254580	T	C	N	.	.	Y	3	2,1	N	.	.	T	6	6,0	INTRON
chr1A	213929734	C	T	C	1	1,0	C	3	3,0	C	2	2,0	Y	10	8,2	INTRON
chr1A	213933208	T	C	Y	10	8,2	T	9	9,0	T	12	12,0	T	6	6,0	INTRON
chr1A	213933275	G	A	G	7	7,0	G	8	8,0	G	17	17,0	R	9	7,2	INTRON
chr1A	214226963	G	A	A	2	0,2	N	.	.	A	8	0,8	A	2	0,2	INTERGENIC
chr1A	214226978	T	C	C	2	0,2	N	.	.	C	11	0,11	C	2	0,2	INTERGENIC
chr1A	216407971	C	A	C	1	1,0	M	10	8,2	C	10	10,0	C	9	9,0	INTERGENIC
chr1A	216409021	G	T	N	.	.	G	9	9,0	G	16	16,0	K	11	9,2	INTERGENIC
chr1A	216417595	A	G	N	.	.	R	11	8,3	A	2	2,0	A	5	5,0	INTRON
chr1A	218522959	C	T	C	4	4,0	Y	16	12,4	C	16	16,0	C	43	43,0	NON_SYNONYMOUS_CODING	Ctc/Ttc	TraesCS1A02G136800
chr1A	218528982	T	A	W	5	3,2	T	8	8,0	T	13	13,0	T	36	36,0	SYNONYMOUS_CODING	gcT/gcA	TraesCS1A02G136800
chr1A	219382280	T	C	T	3	3,0	T	1	1,0	T	3	3,0	Y	9	6,3	INTRON
chr1A	219382926	T	G	T	1	1,0	T	3	3,0	T	8	8,0	K	14	11,3	INTRON
chr1A	219385283	C	G	C	5	5,0	C	9	9,0	C	20	20,0	S	26	22,4	INTRON
chr1A	219986374	G	T	G	2	2,0	G	1	1,0	G	1	1,0	K	6	3,3	INTERGENIC
chr1A	219986845	C	G	N	.	.	C	4	4,0	C	2	2,0	S	5	3,2	INTERGENIC
chr1A	219989658	G	A	A	6	0,6	A	6	0,6	A	3	0,3	A	5	0,5	UNKNOWN
chr1A	219989691	A	T	A	3	3,0	A	6	6,0	A	2	2,0	W	8	6,2	UNKNOWN
chr1A	219990143	A	G	A	1	1,0	A	3	3,0	R	6	2,4	A	11	11,0	UNKNOWN
chr1A	219992139	A	G	G	1	0,1	G	1	0,1	N	.	.	G	5	0,5	UNKNOWN
chr1A	219992768	T	G	T	3	3,0	T	7	7,0	K	11	6,5	T	15	15,0	UNKNOWN
chr1A	219993846	A	C	C	10	0,10	C	7	0,7	C	11	0,11	C	8	0,8	UNKNOWN
chr1A	221709025	C	T	C	7	7,0	Y	9	7,2	C	8	8,0	C	22	22,0	NON_SYNONYMOUS_CODING	Cgc/Tgc	TraesCS1A02G137300
chr1A	221795802	A	G	N	.	.	G	1	0,1	N	.	.	G	7	0,7	INTERGENIC
chr1A	222348436	A	C	N	.	.	M	9	7,2	A	19	19,0	A	12	12,0	INTRON
chr1A	222348612	A	C	N	.	.	A	9	9,0	A	18	18,0	M	12	9,3	INTRON
chr1A	222357438	C	G	N	.	.	C	1	1,0	C	1	1,0	S	7	5,2	INTRON
chr1A	222364211	G	T	N	.	.	G	1	1,0	G	3	3,0	K	3	2,1	INTRON
chr1A	222380160	G	T	T	2	0,2	T	1	0,1	T	3	0,3	T	6	0,6	UNKNOWN
chr1A	222919104	C	A	M	6	4,2	C	10	10,0	C	7	7,0	C	13	13,0	UNKNOWN
chr1A	223826347	T	C	T	6	6,0	T	10	10,0	Y	10	8,2	T	11	11,0	DOWNSTREAM
chr1A	223939657	T	C	T	2	2,0	T	9	9,0	T	4	4,0	Y	14	11,3	INTRON
chr1A	223940995	G	A	G	2	2,0	G	2	2,0	G	7	7,0	R	7	5,2	INTRON
chr1A	223941059	C	A	C	1	1,0	C	2	2,0	C	9	9,0	M	17	13,4	INTRON
chr1A	223941802	A	G	A	4	4,0	G	4	0,4	R	8	2,6	R	9	5,4	INTRON
chr1A	223943063	T	A	T	2	2,0	T	2	2,0	W	12	8,4	T	10	10,0	INTRON
chr1A	223943690	A	G	A	1	1,0	A	9	9,0	A	4	4,0	R	3	2,1	INTRON
chr1A	223943738	A	G	A	1	1,0	A	6	6,0	A	3	3,0	R	7	5,2	INTRON
chr1A	223945882	G	A	N	.	.	G	3	3,0	G	6	6,0	R	12	10,2	INTRON
chr1A	223989492	G	C	N	.	.	N	.	.	N	.	.	S	6	4,2	INTERGENIC
chr1A	223990103	C	A	C	3	3,0	C	2	2,0	C	6	6,0	M	10	8,2	UNKNOWN
chr1A	223990691	G	A	G	1	1,0	G	1	1,0	G	3	3,0	R	6	4,2	UNKNOWN
chr1A	223990862	C	G	N	.	.	C	1	1,0	S	2	0,2	C	10	10,0	UNKNOWN
chr1A	223994955	A	C	A	4	4,0	A	8	8,0	A	5	5,0	M	18	15,3	INTRAGENIC
chr1A	223997109	A	G	R	7	5,2	A	12	12,0	A	13	13,0	A	38	38,0	UNKNOWN
chr1A	224090777	C	G	C	1	1,0	S	7	4,3	C	4	4,0	C	8	8,0	INTERGENIC
chr1A	224095851	C	T	N	.	.	N	.	.	C	2	2,0	Y	5	2,3	INTERGENIC
chr1A	224098103	T	C	T	2	2,0	T	2	2,0	T	2	2,0	Y	9	7,2	INTERGENIC
chr1A	224098864	C	T	Y	2	0,2	C	2	2,0	C	12	12,0	C	10	10,0	INTERGENIC
chr1A	224802995	C	T	N	.	.	C	5	5,0	C	9	9,0	Y	6	4,2	INTRON
chr1A	224803738	C	T	T	3	0,3	T	12	0,12	T	9	0,9	T	18	0,18	INTRON
chr1A	224811671	A	G	N	.	.	A	1	1,0	A	2	2,0	R	5	3,2	INTRON
chr1A	224817257	T	C	T	4	4,0	T	3	3,0	T	5	5,0	Y	2	1,1	INTRON
chr1A	224822577	C	A	N	.	.	C	3	3,0	M	2	1,1	C	7	7,0	INTRON
chr1A	224823890	C	G	N	.	.	C	1	1,0	C	1	1,0	S	5	4,1	INTRON
chr1A	224824418	G	C	N	.	.	N	.	.	G	3	3,0	S	4	2,2	INTRON
chr1A	227258930	G	C	N	.	.	N	.	.	G	2	2,0	S	4	2,2	INTRON
chr1A	227265569	T	A	T	7	6,1	W	15	12,3	W	23	17,6	W	18	12,6	NON_SYNONYMOUS_CODING	Tac/Aac	TraesCS1A02G138000
chr1A	227265735	A	C	A	9	8,1	M	15	8,7	M	29	22,7	M	30	22,8	NON_SYNONYMOUS_CODING	cAa/cCa	TraesCS1A02G138000
chr1A	228087554	C	G	C	1	1,0	C	8	8,0	S	6	4,2	C	6	6,0	UNKNOWN
chr1A	228529874	C	A	N	.	.	C	4	4,0	M	7	5,2	C	7	7,0	INTERGENIC
chr1A	228531056	C	T	Y	1	1,0	T	1	0,1	Y	5	1,4	Y	6	3,3	INTERGENIC
chr1A	228531425	C	T	C	1	1,0	C	3	3,0	C	1	1,0	Y	4	1,3	INTERGENIC
chr1A	230162654	C	T	N	.	.	T	6	0,6	T	1	0,1	T	1	0,1	INTRON
chr1A	230306473	T	C	Y	10	8,2	T	16	16,0	T	16	16,0	T	30	30,0	UNKNOWN
chr1A	230307295	T	G	N	.	.	T	1	1,0	T	1	1,0	K	7	2,5	UNKNOWN
chr1A	233921312	G	C	G	5	5,0	G	10	10,0	S	10	8,2	G	18	18,0	INTRON
chr1A	233923710	G	A	G	2	2,0	G	4	4,0	G	7	7,0	R	9	7,2	INTRON
chr1A	234236835	T	C	C	1	0,1	N	.	.	N	.	.	Y	6	4,2	INTRON
chr1A	234237025	A	G	R	1	0,1	A	2	2,0	A	1	1,0	R	10	8,2	INTRON
chr1A	234239666	T	A	N	.	.	T	1	1,0	T	2	2,0	W	6	3,3	INTRON
chr1A	234239778	A	G	N	.	.	A	3	3,0	A	2	2,0	R	7	4,3	INTRON
chr1A	234242425	T	C	N	.	.	C	2	0,2	N	.	.	C	3	0,3	INTRON
chr1A	234246246	C	T	N	.	.	N	.	.	T	5	0,5	T	2	0,2	INTRON
chr1A	234253928	C	T	Y	3	2,1	C	8	8,0	C	19	19,0	C	6	6,0	INTRON
chr1A	234810487	G	A	G	1	1,0	N	.	.	G	1	1,0	R	10	7,3	INTRON
chr1A	235680121	G	A	R	3	2,1	A	4	0,4	R	3	1,2	R	7	4,3	INTRON
chr1A	236402748	G	A	R	4	2,2	G	7	7,0	G	11	11,0	G	14	14,0	UNKNOWN
chr1A	236717122	T	C	N	.	.	T	6	6,0	T	5	5,0	Y	20	17,3	INTRON
chr1A	236717525	A	G	N	.	.	A	6	6,0	A	5	5,0	R	9	7,2	INTRON
chr1A	237513476	G	C	S	9	6,3	G	17	17,0	G	28	28,0	G	21	21,0	NON_SYNONYMOUS_CODING	Caa/Gaa	TraesCS1A02G139700
chr1A	237515995	G	A	R	1	0,1	N	.	.	G	5	5,0	R	6	5,1	INTRON
chr1A	238649005	C	T	C	2	2,0	C	3	3,0	Y	3	2,1	C	7	7,0	NON_SYNONYMOUS_CODING	Gcg/Acg	TraesCS1A02G140600
chr1A	238653403	C	T	N	.	.	T	3	0,3	T	7	0,7	T	14	0,14	UPSTREAM
chr1A	238655937	T	G	T	4	4,0	N	.	.	T	3	3,0	K	4	2,2	UPSTREAM
chr1A	238656629	T	C	Y	4	3,1	T	2	2,0	T	1	1,0	Y	3	2,1	INTRON
chr1A	238666582	T	A	N	.	.	N	.	.	A	1	0,1	A	3	0,3	INTRON
chr1A	240313246	G	T	N	.	.	G	1	1,0	G	2	2,0	K	5	3,2	INTERGENIC
chr1A	241170520	T	A	T	1	1,0	N	.	.	N	.	.	W	8	5,3	NON_SYNONYMOUS_CODING	Tac/Aac	TraesCS1A02G141600
chr1A	241323166	T	C	N	.	.	Y	4	2,2	T	5	5,0	T	6	6,0	DOWNSTREAM
chr1A	241516925	C	T	T	1	0,1	T	3	0,3	T	2	0,2	T	4	0,4	INTERGENIC
chr1A	241517467	T	C	N	.	.	Y	6	2,4	T	2	2,0	T	8	8,0	INTERGENIC
chr1A	241744717	T	A	W	5	2,3	T	12	12,0	T	2	2,0	T	8	8,0	UNKNOWN
chr1A	241748611	C	A	M	4	2,2	C	5	5,0	C	23	23,0	C	21	21,0	UNKNOWN
chr1A	241993727	T	G	N	.	.	T	3	3,0	T	3	3,0	K	16	12,4	INTRON
chr1A	241995441	C	T	C	3	3,0	C	1	1,0	C	1	1,0	Y	3	1,2	INTRON
chr1A	242001137	T	C	N	.	.	N	.	.	T	1	1,0	Y	4	2,2	INTRON
chr1A	242002784	T	C	N	.	.	T	1	1,0	Y	4	2,2	T	7	7,0	INTRON
chr1A	242006244	A	G	N	.	.	G	1	0,1	G	2	0,2	G	6	0,6	INTRON
chr1A	242008241	C	T	N	.	.	C	2	2,0	N	.	.	Y	5	1,4	INTRON
chr1A	243163145	C	G	G	3	0,3	G	8	0,8	G	12	0,12	G	8	0,8	UTR_5_PRIME
chr1A	243617796	A	G	R	9	7,2	A	13	13,0	A	8	8,0	A	24	24,0	DOWNSTREAM
chr1A	243619104	A	T	A	8	8,0	W	9	7,2	A	15	15,0	A	11	11,0	DOWNSTREAM
chr1A	243622452	A	G	A	1	1,0	A	4	4,0	A	5	5,0	R	8	6,2	INTRON
chr1A	243671086	C	T	N	.	.	N	.	.	C	1	1,0	Y	3	1,2	INTERGENIC
chr1A	243992027	C	T	N	.	.	T	1	0,1	N	.	.	T	6	0,6	INTERGENIC
chr1A	244308513	T	C	N	.	.	C	4	0,4	C	1	0,1	C	6	0,6	UNKNOWN
chr1A	244501422	A	T	A	12	12,0	A	9	9,0	A	17	17,0	W	10	8,2	NON_SYNONYMOUS_CODING	Tcg/Acg	TraesCS1A02G142700
chr1A	244510461	G	T	K	4	1,3	G	3	3,0	G	7	7,0	G	9	9,0	NON_SYNONYMOUS_CODING	Ccg/Acg	TraesCS1A02G142800
chr1A	244510577	G	T	T	3	0,3	N	.	.	G	7	7,0	G	11	11,0	NON_SYNONYMOUS_CODING	gCc/gAc	TraesCS1A02G142800
chr1A	244510605	A	G	G	3	0,3	N	.	.	A	8	8,0	A	7	7,0	UTR_5_PRIME
chr1A	244511577	C	A	C	2	2,0	M	7	5,2	C	5	5,0	C	5	5,0	UTR_5_PRIME
chr1A	244512767	C	T	C	1	1,0	C	7	7,0	Y	9	7,2	C	17	17,0	UTR_5_PRIME
chr1A	244554337	A	G	G	8	0,8	G	5	0,5	G	3	0,3	G	3	0,3	UNKNOWN
chr1A	244556607	T	C	N	.	.	C	1	0,1	C	5	0,5	C	4	0,4	UNKNOWN
chr1A	244556685	T	C	N	.	.	C	1	0,1	C	2	0,2	C	2	0,2	UNKNOWN
chr1A	244556830	C	G	C	8	8,0	C	8	8,0	C	11	11,0	S	10	8,2	UNKNOWN
chr1A	244557073	T	C	Y	3	2,1	T	5	5,0	T	4	4,0	T	7	7,0	UNKNOWN
chr1A	244557480	C	A	C	4	4,0	C	8	8,0	C	5	5,0	M	12	9,3	UNKNOWN
chr1A	244557733	T	C	C	2	0,2	C	2	0,2	C	1	0,1	C	7	0,7	UNKNOWN
chr1A	244559513	A	G	A	4	4,0	A	8	8,0	R	8	6,2	A	9	9,0	UNKNOWN
chr1A	244591557	G	C	N	.	.	G	1	1,0	S	6	1,5	G	9	9,0	INTERGENIC
chr1A	245057766	G	A	R	6	4,2	G	21	21,0	G	12	12,0	G	25	25,0	INTERGENIC
chr1A	245522668	C	T	N	.	.	N	.	.	C	1	1,0	Y	4	2,2	INTRON
chr1A	245527254	C	G	S	2	0,2	C	3	3,0	C	8	8,0	C	8	8,0	UTR_3_PRIME
chr1A	246128072	A	G	A	1	1,0	R	10	7,3	A	8	8,0	A	11	11,0	SYNONYMOUS_CODING	ggT/ggC	TraesCS1A02G143200
chr1A	246128210	G	A	G	1	1,0	R	15	11,4	G	8	8,0	G	23	23,0	SYNONYMOUS_CODING	atC/atT	TraesCS1A02G143200
chr1A	246691990	G	A	G	3	3,0	G	6	6,0	R	5	2,3	G	20	20,0	INTRON
chr1A	246692188	A	G	A	8	8,0	A	4	4,0	R	10	6,4	A	18	18,0	INTRON
chr1A	246692474	C	A	M	3	1,2	C	5	5,0	C	3	3,0	C	7	7,0	INTRON
chr1A	247312222	C	T	C	11	11,0	C	8	8,0	C	6	6,0	Y	10	8,2	UTR_3_PRIME
chr1A	247314348	C	A	C	10	10,0	M	15	13,2	C	17	17,0	C	34	34,0	STOP_GAINED	Gag/Tag	TraesCS1A02G143400
chr1A	247317475	A	G	A	1	1,0	A	3	3,0	R	6	4,2	A	26	26,0	NON_SYNONYMOUS_CODING	tTc/tCc	TraesCS1A02G143400
chr1A	247317772	C	G	C	3	3,0	C	1	1,0	C	6	6,0	S	16	11,5	NON_SYNONYMOUS_CODING	gGc/gCc	TraesCS1A02G143400
chr1A	247320155	C	T	Y	3	1,2	C	3	3,0	C	5	5,0	C	6	6,0	NON_SYNONYMOUS_CODING	Gag/Aag	TraesCS1A02G143400
chr1A	247320919	A	G	A	4	4,0	R	5	3,2	A	1	1,0	A	17	17,0	NON_SYNONYMOUS_CODING	Tgt/Cgt	TraesCS1A02G143400
chr1A	247329565	C	G	C	1	1,0	C	2	2,0	S	4	2,2	C	9	9,0	NON_SYNONYMOUS_CODING	Gaa/Caa	TraesCS1A02G143400
chr1A	247330107	C	G	N	.	.	C	2	2,0	C	1	1,0	S	7	5,2	NON_SYNONYMOUS_CODING	tgG/tgC	TraesCS1A02G143400
chr1A	249045797	G	T	N	.	.	G	3	3,0	K	9	7,2	G	13	13,0	NON_SYNONYMOUS_CODING	tGt/tTt	TraesCS1A02G144000
chr1A	249049710	C	T	Y	8	6,2	C	6	6,0	C	11	11,0	C	10	10,0	SYNONYMOUS_CODING	gtC/gtT	TraesCS1A02G144000
chr1A	249052395	T	C	T	2	2,0	T	5	5,0	Y	9	7,2	T	13	13,0	SYNONYMOUS_CODING	tgT/tgC	TraesCS1A02G144000
chr1A	249052444	A	G	R	4	3,1	A	7	7,0	A	12	12,0	A	20	20,0	NON_SYNONYMOUS_CODING	Aag/Gag	TraesCS1A02G144000
chr1A	249055134	T	C	T	1	1,0	T	7	7,0	T	7	7,0	Y	5	3,2	INTRON
chr1A	249379348	A	G	A	2	2,0	N	.	.	R	3	1,2	A	14	14,0	UNKNOWN
chr1A	249379562	T	C	Y	7	5,2	T	5	5,0	T	11	11,0	T	37	37,0	UNKNOWN
chr1A	250194652	C	T	C	6	6,0	Y	2	0,2	C	13	13,0	C	15	15,0	INTERGENIC
chr1A	250494661	T	C	N	.	.	T	8	8,0	Y	8	6,2	T	8	8,0	UNKNOWN
chr1A	251345591	T	C	N	.	.	N	.	.	Y	4	1,3	Y	4	3,1	SYNONYMOUS_CODING	Ttg/Ctg	TraesCS1A02G145100
chr1A	251346557	C	A	C	4	4,0	M	2	0,2	C	8	8,0	C	8	8,0	NON_SYNONYMOUS_CODING	Cag/Aag	TraesCS1A02G145100
chr1A	251346852	G	T	G	5	5,0	G	3	3,0	K	4	3,1	G	6	6,0	NON_SYNONYMOUS_CODING	cGa/cTa	TraesCS1A02G145100
chr1A	251563519	C	T	Y	2	0,2	C	2	2,0	C	22	22,0	C	18	18,0	NON_SYNONYMOUS_CODING	Gac/Aac	TraesCS1A02G145500
chr1A	251590728	G	A	R	6	4,2	G	16	16,0	G	20	20,0	G	32	32,0	UNKNOWN
chr1A	251590982	A	G	R	15	12,3	A	12	12,0	A	22	22,0	A	29	29,0	UNKNOWN
chr1A	252281020	A	G	N	.	.	A	7	7,0	R	6	4,2	A	11	11,0	DOWNSTREAM
chr1A	252285437	A	G	A	1	1,0	N	.	.	R	17	14,3	A	5	5,0	INTRON
chr1A	252495709	A	G	R	6	1,5	R	5	2,3	R	6	4,2	R	3	1,2	INTERGENIC
chr1A	252495735	G	C	G	6	6,0	G	5	5,0	G	6	6,0	S	3	2,1	INTERGENIC
chr1A	252495790	C	A	A	1	0,1	A	2	0,2	A	4	0,4	A	1	0,1	INTERGENIC
chr1A	252625353	T	A	T	1	1,0	W	3	2,1	T	1	1,0	T	5	5,0	INTRON
chr1A	252625736	A	G	A	2	2,0	R	4	2,2	N	.	.	A	7	7,0	INTRON
chr1A	252626984	C	A	N	.	.	C	7	7,0	C	2	2,0	M	8	6,2	INTRON
chr1A	252627144	A	T	N	.	.	A	5	5,0	W	16	12,4	A	8	8,0	SYNONYMOUS_CODING	ggT/ggA	TraesCS1A02G146400
chr1A	252798755	T	C	T	2	2,0	Y	4	2,2	T	1	1,0	T	14	14,0	INTERGENIC
[truncated: 155,658 more rows]
