# Supplementary material for: Bulked Segregant RNA-Seq Provides Distinctive Expression Profile Against Powdery Mildew in the Wheat Genotype YD588
Source: Front Plant Sci. 2021 Dec 3;12:764978. doi: 10.3389/fpls.2021.764978 (PMC8677838; doi:10.3389/fpls.2021.764978)
Supplement: Supplementary file 4 [file Table_4.XLSX]

## Sheet: Table S4
Table S4. Differentially expressed genes (DEGs) betwwen the resistance parent YD588 and susceptible parent Yannong 21 (YN21).
#ID	YN21_Count	YD588_Count	YN21_FPKM	YD588_FPKM	FDR	log2FC	regulated
TraesCS1A01G002400	0	54	0	10.6141	1.06e-09	5.14866	up
TraesCS1A01G004200	515	12	24.1641	0.562737	0	-5.28636	down
TraesCS1A01G005000	0	294	0	2.40311	0	7.55986	up
TraesCS1A01G005200	4	47	0.0251555	0.29338	1.86e-05	3.09945	up
TraesCS1A01G006300	49	3835	0.268355	22.2305	0	6.21096	up
TraesCS1A01G006800	25	148	0.136366	0.832486	2.31e-07	2.45956	up
TraesCS1A01G008100	21	83	0.0875688	0.369035	0.00108191	1.87273	up
TraesCS1A01G009300	23	247	0.115058	1.06422	1.55e-13	3.30549	up
TraesCS1A01G010200	190	0	1.40246	0	0	-6.96956	down
TraesCS1A01G011200	44	2	1.02472	0.103689	1.44e-06	-3.70983	down
TraesCS1A01G011800	34	2	0.759752	0.0505609	7.15e-05	-3.35204	down
TraesCS1A01G011900	406	56	3.14666	0.46567	1.19e-12	-2.85922	down
TraesCS1A01G014900	53	7	0.40512	0.05678	4.14e-05	-2.70586	down
TraesCS1A01G015500	100	0	4.34321	0	3.33e-16	-6.05388	down
TraesCS1A01G015800	625	0	22.1295	0	0	-8.67938	down
TraesCS1A01G017900	1992	12	20.5782	0.14735	0	-7.23476	down
TraesCS1A01G018000	295	0	2.14339	0	0	-7.60017	down
TraesCS1A01G018600	156	12	1.83208	0.162308	6.68e-13	-3.57312	down
TraesCS1A01G018900	368	57	7.5224	1.29334	2.93e-11	-2.69316	down
TraesCS1A01G019000	1761	482	283.77	72.4604	8.08e-07	-1.90148	down
TraesCS1A01G019200	297	67	4.95811	1.40528	2.12e-07	-2.15792	down
TraesCS1A01G020300	145	1	0.878777	0.00813573	0	-5.8709	down
TraesCS1A01G020900	556	1927	14.3696	53.7557	1.03e-05	1.75479	up
TraesCS1A01G021400	14	130	8.89375	37.7668	1.67e-09	3.0472	up
TraesCS1A01G023200	49	5	2.45869	0.281919	1.67e-05	-2.97953	down
TraesCS1A01G023700	66	223	3.15454	10.5169	0.00019266	1.69796	up
TraesCS1A01G024500	145	457	7.01151	21.1444	0.000160105	1.61033	up
TraesCS1A01G024600	19	281	0.94905	14.7787	1.11e-16	3.74729	up
TraesCS1A01G025500	0	88	2.14e-06	3.22597	2.3e-14	5.83741	up
TraesCS1A01G025600	1	279	0.0114463	2.23449	0	6.75845	up
TraesCS1A01G028500	40	225	0.284592	2.35091	3.33e-08	2.41215	up
TraesCS1A01G030000	1252	491	393.242	134.196	0.00195881	-1.38323	down
TraesCS1A01G030900	104	1	0.924094	0.0112955	1.44e-15	-5.39735	down
TraesCS1A01G032900	201	42	4.6681	1.01346	3.21e-07	-2.25246	down
TraesCS1A01G033500	25664	9679	2122.95	707.811	0.00411867	-1.44229	down
TraesCS1A01G035100	237	593	6.25986	14.4809	0.00726586	1.28205	up
TraesCS1A01G035600	2688	955	124.026	41.8729	0.000325879	-1.52704	down
TraesCS1A01G037700	55	160	1.05955	2.88964	0.00380699	1.47946	up
TraesCS1A01G037900	513	65	5.56601	0.754174	3.67e-14	-2.98601	down
TraesCS1A01G039800	44	129	1.5272	4.20966	0.00591773	1.48433	up
TraesCS1A01G044000	6	441	0.0672864	4.89725	0	5.84182	up
TraesCS1A01G045800	74	0	3.43572	0	4.9e-13	-5.62709	down
TraesCS1A01G048100	0	41	0	0.484082	1.49e-07	4.76416	up
TraesCS1A01G048600	68	4	0.55475	0.04217	1.14e-08	-3.6784	down
TraesCS1A01G048700	6	40	0.974942	5.62846	0.00159687	2.42941	up
TraesCS1A01G049100	29	322	1.33421	13.5396	4.88e-15	3.37022	up
TraesCS1A01G050200	66	2	1.72176	0.0584139	7.1e-10	-4.27856	down
TraesCS1A01G051200	55	0	1.2101	0	3.16e-10	-5.20904	down
TraesCS1A01G051500	51	610	1.58475	18.8301	0	3.50572	up
TraesCS1A01G051800	162	23	11.7682	1.61512	2.67e-09	-2.7704	down
TraesCS1A01G052300	327	122	8.54914	3.25793	0.00153401	-1.44635	down
TraesCS1A01G052400	2	153	0.169119	0.929128	0	5.41752	up
TraesCS1A01G053600	115	0	0.735241	0	0	-6.25268	down
TraesCS1A01G054300	51	0	0.219672	0.000306093	1.41e-09	-5.10316	down
TraesCS1A01G054400	85	12	0.407643	0.0666267	9.55e-07	-2.70875	down
TraesCS1A01G056200	42	4	2.8111	0.299663	5.39e-05	-3.00275	down
TraesCS1A01G057200	558	140	8.42545	1.93567	3.13e-07	-2.01836	down
TraesCS1A01G059100	47	7	1.57003	0.217792	0.000255266	-2.53768	down
TraesCS1A01G064000	864	350	23.4367	10.5827	0.00350963	-1.33541	down
TraesCS1A01G064100	282	111	4.74569	1.86759	0.00424705	-1.36834	down
TraesCS1A01G066300	171	0	2.01569	0	0	-6.81883	down
TraesCS1A01G066600	55	0	4.7308	0	3.16e-10	-5.20904	down
TraesCS1A01G068400	109	440	11.7175	45.9775	1.39e-06	1.96259	up
TraesCS1A01G069700	111	288	4.37251	10.358	0.00678266	1.32798	up
TraesCS1A01G070200	36	0	1.88316	0	6.26e-07	-4.61805	down
TraesCS1A01G070500	36	1	1.04032	0.0378081	5.63e-06	-3.90577	down
TraesCS1A01G071300	72	18	0.511458	0.166423	0.000986217	-1.94554	down
TraesCS1A01G071500	157	43	31.8831	4.27939	7.52e-05	-1.86633	down
TraesCS1A01G071800	2042	770	35.4986	13.874	0.00101239	-1.44082	down
TraesCS1A01G073200	139	30	1.86598	0.412449	4.26e-06	-2.19002	down
TraesCS1A01G073500	252	70	3.84222	0.756264	1.77e-05	-1.86042	down
TraesCS1A01G074800	1327	482	26.3115	9.44067	0.000445578	-1.49367	down
TraesCS1A01G078200	10	130	0.515313	5.98768	3.08e-11	3.47693	up
TraesCS1A01G078600	6	50	0.299276	2.24665	7.24e-05	2.74043	up
TraesCS1A01G079500	4	56	0.199676	2.49258	1.03e-06	3.34472	up
TraesCS1A01G082300	303	91	19.3029	5.59634	4.3e-05	-1.75364	down
TraesCS1A01G082500	2615	1080	59.1959	27.5823	0.00636387	-1.31016	down
TraesCS1A01G084100	261	80	10.7402	3.76296	8.75e-05	-1.72205	down
TraesCS1A01G084800	190	608	8.28883	18.2615	8.86e-05	1.6346	up
TraesCS1A01G087500	237	739	1.15073	4.41082	0.000127043	1.59885	up
TraesCS1A01G088600	4	62	0.0513192	0.864134	1.64e-07	3.48775	up
TraesCS1A01G091400	38	125	0.326059	1.1837	0.00161943	1.64332	up
TraesCS1A01G092700	158	1517	6.8338	63.8031	0	3.2152	up
TraesCS1A01G094700	85	24	2.36186	0.66307	0.00150953	-1.79454	down
TraesCS1A01G094900	398	145	5.43312	2.1927	0.000820588	-1.48237	down
TraesCS1A01G099900	49	158	1.54068	4.7101	0.0010052	1.62337	up
TraesCS1A01G100400	687	229	5.05091	1.94938	9.69e-05	-1.61396	down
TraesCS1A01G102700	92	0	7.80921	0	2.33e-15	-5.93547	down
TraesCS1A01G102800	612	78	41.9785	5.74877	1.54e-14	-2.98252	down
TraesCS1A01G102900	77	25	4.74489	1.56636	0.00913072	-1.59923	down
TraesCS1A01G104300	119	16	3.96338	0.507773	2.22e-08	-2.8141	down
TraesCS1A01G108100	37	0	0.326477	1.28e-05	4.06e-07	-4.65599	down
TraesCS1A01G108400	689	1892	31.9828	79.1447	0.00140221	1.41971	up
TraesCS1A01G111800	483	128	55.01	13.9265	1.36e-06	-1.93851	down
TraesCS1A01G112200	137	49	1.22132	0.459057	0.00441309	-1.48955	down
TraesCS1A01G113300	481	1378	9.91452	29.0192	0.000581569	1.47991	up
TraesCS1A01G119300	1479	597	42.3389	16.5451	0.00343967	-1.34215	down
TraesCS1A01G120100	34	173	0.229054	1.21894	8.23e-07	2.26111	up
TraesCS1A01G121900	252	100	1.68431	0.704429	0.00552719	-1.35535	down
TraesCS1A01G122300	12	50	0.246806	1.15261	0.0082869	1.89484	up
TraesCS1A01G125400	6	38	0.0964328	0.431285	0.00300586	2.35827	up
TraesCS1A01G126900	1134	415	16.9021	6.40329	0.000518007	-1.48237	down
TraesCS1A01G135400	6	42	0.0300733	0.241339	0.00085158	2.49721	up
TraesCS1A01G138400	374	966	0.875468	2.41092	0.00396312	1.32982	up
TraesCS1A01G140700	353	50	4.47443	0.365153	5.39e-12	-2.81702	down
TraesCS1A01G140900	117	42	1.76724	0.736745	0.00700454	-1.47957	down
TraesCS1A01G141500	577	48	33.0536	2.58712	0	-3.58058	down
TraesCS1A01G141900	515	127	18.018	3.26277	2.53e-07	-2.04196	down
TraesCS1A01G143900	49	170	0.898754	3.26827	0.000288834	1.72798	up
TraesCS1A01G145800	599	2326	14.5599	58.3662	6.97e-07	1.91889	up
TraesCS1A01G150800	34	0	0.458153	0	1.51e-06	-4.53904	down
TraesCS1A01G151600	47	153	1.04817	3.00744	0.000973093	1.63571	up
TraesCS1A01G153100	1123	467	18.6257	7.44233	0.0056093	-1.29862	down
TraesCS1A01G155000	286	9	4.32817	0.139741	0	-4.80177	down
TraesCS1A01G156400	1342	463	31.7736	10.4106	0.000156036	-1.56769	down
TraesCS1A01G162400	3	69	0.136421	2.8489	4.3e-09	3.92634	up
TraesCS1A01G163000	8	41	0.248198	1.30137	0.00620013	2.12381	up
TraesCS1A01G163700	4	57	0.0740037	1.01962	7.56e-07	3.36956	up
TraesCS1A01G165500	0	477	0	15.7282	0	8.2551	up
TraesCS1A01G165600	312	108	7.32535	2.41164	0.000477144	-1.55241	down
TraesCS1A01G165900	53	519	4.06194	34.3087	1.11e-15	3.21938	up
TraesCS1A01G166000	57	0	7.3302	0	1.53e-10	-5.2592	down
TraesCS1A01G167400	36	111	0.324259	1.0662	0.00507378	1.5491	up
TraesCS1A01G169500	66	12	2.81218	0.52737	8.74e-05	-2.35107	down
TraesCS1A01G171000	344	40	14.334	1.58963	9.26e-14	-3.09094	down
TraesCS1A01G171300	96	2	4.44009	0.104178	1.19e-13	-4.80889	down
TraesCS1A01G173100	1228	306	20.6074	5.03927	9.43e-08	-2.03476	down
TraesCS1A01G173800	145	488	3.90021	12.5755	4.28e-05	1.7047	up
TraesCS1A01G174900	6	43	0.415282	1.41908	0.000622917	2.52995	up
TraesCS1A01G175200	79	16	134.325	22.724	6.98e-05	-2.2323	down
TraesCS1A01G176700	614	180	5.74238	1.60207	7.77e-06	-1.79695	down
TraesCS1A01G178600	2	41	0.0297487	0.686574	8.6e-06	3.55708	up
TraesCS1A01G181000	8064	666	150.495	13.4388	0	-3.63041	down
TraesCS1A01G183000	443	122	4.53032	1.30881	3.59e-06	-1.88261	down
TraesCS1A01G183700	0	54	0	0.345317	1.06e-09	5.14866	up
TraesCS1A01G183900	254	796	1.63614	5.3976	0.000110218	1.6065	up
TraesCS1A01G184000	62	3	5.95008	0.318295	1.51e-08	-3.83388	down
TraesCS1A01G185300	113	511	1.31197	6.19701	8.79e-08	2.12641	up
TraesCS1A01G186100	4039	853	248.655	50.7834	7.92e-10	-2.2769	down
TraesCS1A01G186400	907	40	45.5762	1.95412	0	-4.48566	down
TraesCS1A01G186500	1260	389	75.0779	22.4197	1.44e-05	-1.72716	down
TraesCS1A01G186800	762	2690	26.9551	96.4929	6.95e-06	1.78207	up
TraesCS1A01G187000	455	129	43.2086	11.416	6.16e-06	-1.84154	down
TraesCS1A01G188700	2926	1226	92.4028	38.3184	0.0087256	-1.28951	down
TraesCS1A01G191200	376	0	2.37552	0	0	-7.94858	down
TraesCS1A01G191600	74	0	0.782266	0	4.9e-13	-5.62709	down
TraesCS1A01G192600	57	277	8.28846	35.0094	1.65e-07	2.21519	up
TraesCS1A01G198600	712	96	11.8698	1.5636	3.21e-14	-2.90614	down
TraesCS1A01G199700	66	8	1.67259	0.171871	2.74e-06	-2.85506	down
TraesCS1A01G201200	137	52	4.77605	1.76428	0.00912987	-1.4064	down
TraesCS1A01G206400	122	40	1.8076	0.56555	0.00210048	-1.60697	down
TraesCS1A01G207900	27	230	0.591549	4.62926	1.82e-11	2.98534	up
TraesCS1A01G211500	969	303	17.5036	5.72347	2.1e-05	-1.70764	down
TraesCS1A01G212000	36	0	2.22515	0	6.26e-07	-4.61805	down
TraesCS1A01G213700	145	43	3.6128	0.917992	0.000314916	-1.75277	down
TraesCS1A01G213800	40	8	0.464673	0.107407	0.00499318	-2.15366	down
TraesCS1A01G214700	83	4	1.98976	0.109817	1.55e-10	-3.96023	down
TraesCS1A01G216000	47	3	1.04698	0.141779	2.36e-06	-3.44531	down
TraesCS1A01G219200	104	33	4.76603	1.45994	0.00244243	-1.64581	down
TraesCS1A01G227900	1272	407	17.0575	5.52215	3.16e-05	-1.67581	down
TraesCS1A01G228000	3346	989	129.178	36.8737	5.46e-06	-1.79239	down
TraesCS1A01G234600	8637	33027	324.62	1187.85	3.42e-06	1.89923	up
TraesCS1A01G236700	17	70	1.09889	4.18758	0.00168599	1.91393	up
TraesCS1A01G239100	218	4	1.21413	0.0272303	0	-5.33713	down
TraesCS1A01G241500	44	0	0.548679	0	2.18e-08	-4.89683	down
TraesCS1A01G244300	214	75	5.33055	1.86022	0.00117023	-1.52872	down
TraesCS1A01G246700	38	128	4.54932	13.23	0.00111372	1.67711	up
TraesCS1A01G250000	629	264	35.951	14.1296	0.00674686	-1.28311	down
TraesCS1A01G250100	154	38	6.08152	1.60175	1.76e-05	-2.01045	down
TraesCS1A01G250700	147	8	1.64623	0.0826864	2.84e-14	-3.99224	down
TraesCS1A01G253600	10	67	0.208396	1.26603	2.92e-05	2.53671	up
TraesCS1A01G254500	659	92	6.86079	0.99727	1.14e-13	-2.85518	down
TraesCS1A01G254600	66	20	0.445019	0.153735	0.00872163	-1.68233	down
TraesCS1A01G255300	462	178	3.36856	1.16496	0.00186171	-1.40376	down
TraesCS1A01G257200	363	56	9.5104	1.38097	2.91e-11	-2.69835	down
TraesCS1A01G257400	612	56	15.9386	1.40976	0	-3.44945	down
TraesCS1A01G259100	193	7	11.69	0.420292	0	-4.54077	down
TraesCS1A01G259300	17	85	0.156784	0.538206	8.29e-05	2.18846	up
TraesCS1A01G260700	32	128	2.60527	10.0307	0.000122935	1.91462	up
TraesCS1A01G261400	318	1282	4.49859	20.113	3.31e-07	1.97052	up
TraesCS1A01G263700	834	218	37.9183	9.41554	4.27e-07	-1.96365	down
TraesCS1A01G264600	40	1	1.44163	0.0385674	1.09e-06	-4.05188	down
TraesCS1A01G265600	10754	3041	5496.11	1594.14	3.07e-06	-1.85734	down
TraesCS1A01G265800	291	27	403.802	29.2932	4.66e-15	-3.39181	down
TraesCS1A01G268900	59	8	2.23722	0.304944	1.91e-05	-2.69718	down
TraesCS1A01G270900	274	1084	23.147	88.6047	5.79e-07	1.94255	up
TraesCS1A01G273500	19	103	1.6679	8.42362	9.46e-06	2.31312	up
TraesCS1A01G275900	23	118	0.839071	5.64983	7.56e-06	2.24967	up
TraesCS1A01G277400	515	162	17.3456	5.0382	4.06e-05	-1.69459	down
TraesCS1A01G279200	53	4	1.24253	0.102139	1.26e-06	-3.3278	down
TraesCS1A01G281100	147	44	2.17271	0.597773	0.000341008	-1.74032	down
TraesCS1A01G282600	0	240	0	8.88287	0	7.2688	up
TraesCS1A01G284900	192	783	11.1243	42.2542	4e-07	1.98373	up
TraesCS1A01G287200	753	34	143.046	5.83491	0	-4.44261	down
TraesCS1A01G292400	158	43	3.42991	0.867491	6.68e-05	-1.87541	down
TraesCS1A01G292700	111	0	2.42615	0	0	-6.20229	down
TraesCS1A01G295900	14	145	2.01405	18.3086	1.2e-10	3.20297	up
TraesCS1A01G299100	2536	278	40.8108	4.50009	0	-3.21778	down
TraesCS1A01G299200	700	3868	15.6129	76.2713	5.08e-11	2.42797	up
TraesCS1A01G300200	34	0	1.31609	0	1.51e-06	-4.53904	down
TraesCS1A01G303600	42	136	4.17838	12.8626	0.00150001	1.62448	up
TraesCS1A01G304000	10	98	0.411474	3.59477	2.11e-08	3.07487	up
TraesCS1A01G308000	250	97	5.58204	2.17035	0.0040272	-1.38718	down
TraesCS1A01G308700	214	38	38.4548	6.55085	1.29e-08	-2.48115	down
TraesCS1A01G309700	83	25	1.5384	0.47797	0.00326719	-1.70545	down
TraesCS1A01G311100	233	643	6.03496	15.4619	0.0013418	1.42294	up
TraesCS1A01G312300	25	85	0.150977	0.541836	0.00449634	1.67066	up
TraesCS1A01G314800	40	497	3.79944	31.6356	0	3.55	up
TraesCS1A01G316100	326	58	3.88753	0.501322	1.13e-09	-2.49467	down
TraesCS1A01G316900	3097	640	155.429	31.3931	4.29e-10	-2.30754	down
TraesCS1A01G317700	5	269	0.0147147	24.6279	0	5.33752	up
TraesCS1A01G320900	1400	89	15.9824	1.03514	0	-3.9875	down
TraesCS1A01G322000	199	0	3.07932	0	0	-7.03581	down
TraesCS1A01G322700	1014	55	7.73231	0.440819	0	-4.20176	down
TraesCS1A01G322900	2	107	0.0406572	2.08148	2.53e-14	4.90787	up
TraesCS1A01G323000	376	135	5.36097	1.95443	0.000682087	-1.50261	down
TraesCS1A01G323400	1149	482	13.8151	6.31942	0.0065556	-1.28613	down
TraesCS1A01G324000	62	324	1.71119	8.8598	2.01e-08	2.32186	up
TraesCS1A01G325500	126	358	2.38777	7.55486	0.00129989	1.45982	up
TraesCS1A01G325600	565	1501	130.413	320.449	0.00248961	1.37159	up
TraesCS1A01G326100	436	1314	26.7422	77.9445	0.000211093	1.55261	up
TraesCS1A01G326200	29	118	1.16124	4.53604	0.000144066	1.93397	up
TraesCS1A01G328100	88	323	8.85351	30.8409	1.83e-05	1.82248	up
TraesCS1A01G330900	841	362	62.5927	23.9556	0.00991645	-1.24813	down
TraesCS1A01G331800	222	81	3.59014	1.31616	0.00197875	-1.47245	down
TraesCS1A01G333200	151	11	3.96287	0.299178	5.38e-13	-3.63705	down
TraesCS1A01G334800	0	3088	0	64.218	0	10.9457	up
TraesCS1A01G337800	1012	2629	53.6125	133.699	0.00451545	1.34036	up
TraesCS1A01G338400	94	11	15.6835	1.78403	5.01e-08	-2.96198	down
TraesCS1A01G338500	47	5	2.91661	0.338468	3.23e-05	-2.92127	down
TraesCS1A01G338700	0	231	0	19.7496	0	7.21402	up
TraesCS1A01G339800	44	127	0.469031	1.5078	0.00740445	1.46206	up
TraesCS1A01G340100	38	2	0.536328	0.0313313	1.45e-05	-3.50595	down
TraesCS1A01G341200	34	109	1.53885	4.72845	0.00346062	1.60225	up
TraesCS1A01G341600	0	62	0	1.06962	6.6e-11	5.34271	up
TraesCS1A01G341700	0	287	0	2.45955	0	7.52528	up
TraesCS1A01G342000	12	103	0.712833	5.30393	4.96e-08	2.91475	up
TraesCS1A01G342100	0	41	0	6.98343	1.49e-07	4.76416	up
TraesCS1A01G342500	428	1076	6.328	16.7883	0.0063712	1.29133	up
TraesCS1A01G343700	141	51	4.80999	1.77558	0.00472084	-1.47466	down
TraesCS1A01G349200	0	285	0.000240433	27.0931	0	7.51525	up
TraesCS1A01G349600	10	72	0.0339672	0.246637	8.53e-06	2.63825	up
TraesCS1A01G351300	111	21	66.5225	10.3898	3.07e-06	-2.35366	down
TraesCS1A01G351600	23	97	0.565858	2.27335	0.000248054	1.97103	up
TraesCS1A01G352500	85	17	7.22296	1.41668	3.74e-05	-2.2561	down
TraesCS1A01G353300	742	278	4.12453	1.59968	0.000881151	-1.44682	down
TraesCS1A01G353800	663	273	60.0631	21.2528	0.00484539	-1.3108	down
TraesCS1A01G355100	261	103	9.96556	4.66551	0.00486851	-1.36368	down
TraesCS1A01G355300	203	3270	23.8405	344.083	0	3.96399	up
TraesCS1A01G355600	23	142	0.0852899	0.735998	1.72e-07	2.51358	up
TraesCS1A01G356300	66	0	0.975292	0	6.66e-12	-5.46556	down
TraesCS1A01G356400	2	101	0.0301848	1.39304	1.1e-13	4.82585	up
TraesCS1A01G358700	0	58	0	3.15765	2.59e-10	5.24895	up
TraesCS1A01G360300	77	253	0.30412	1.08084	0.000219733	1.66114	up
TraesCS1A01G362100	1644	562	70.2471	21.9824	0.000129265	-1.58152	down
TraesCS1A01G362900	0	35	0	0.328603	1.8e-06	4.54497	up
TraesCS1A01G363400	10	102	2.23955	19.0015	8.87e-09	3.13169	up
TraesCS1A01G364000	231	1	9.86464	0.0409404	0	-6.53712	down
TraesCS1A01G364800	438	35	12.9007	1.06171	0	-3.62299	down
TraesCS1A01G366500	1406	511	48.4044	16.5198	0.000452256	-1.49298	down
TraesCS1A01G367200	96	23	2.03457	0.491744	0.000134267	-2.02476	down
TraesCS1A01G367500	372	109	23.0245	2.64925	1.74e-05	-1.79193	down
TraesCS1A01G367900	49	10	7.07209	1.42161	0.00165497	-2.16277	down
TraesCS1A01G368000	147	16	3.26595	0.377608	1.47e-10	-3.11547	down
TraesCS1A01G369600	27173	9879	319.799	114.704	0.00197898	-1.49521	down
TraesCS1A01G372200	10	61	0.439597	2.37016	0.000132119	2.40459	up
TraesCS1A01G373300	85	236	2.07915	5.91513	0.00333504	1.42146	up
TraesCS1A01G374200	37	7	32.9434	5.25389	0.00578906	-2.20477	down
TraesCS1A01G374700	40	7	0.612649	0.101156	0.00225099	-2.31295	down
TraesCS1A01G374900	81	25	0.638017	0.207109	0.00460578	-1.67091	down
TraesCS1A01G383400	4	104	1.59044	34.3272	2.26e-12	4.21957	up
TraesCS1A01G383500	100	0	11.054	0	3.33e-16	-6.05388	down
TraesCS1A01G384300	8	161	0.160782	2.87951	9.33e-15	4.05705	up
TraesCS1A01G385900	108	37	7.39987	2.49881	0.00517187	-1.54151	down
TraesCS1A01G386900	0	194	0	9.37009	0	6.96404	up
TraesCS1A01G387400	62	12	1.95015	0.377127	0.000234821	-2.26298	down
TraesCS1A01G393700	8	56	0.233832	0.964299	8.97e-05	2.55932	up
TraesCS1A01G396400	336	103	5.15722	1.50518	4.98e-05	-1.72621	down
TraesCS1A01G396800	261	4	15.6621	0.264027	0	-5.5952	down
TraesCS1A01G397500	154	48	23.1208	6.60165	0.000511599	-1.68537	down
TraesCS1A01G401800	89	28	3.34377	0.996021	0.00391959	-1.65003	down
TraesCS1A01G402400	252	81	3.58381	1.18338	0.000210473	-1.65414	down
TraesCS1A01G406200	355	108	10.8466	3.03699	3.88e-05	-1.73783	down
TraesCS1A01G406300	402	168	46.2226	19.8882	0.00763319	-1.28644	down
TraesCS1A01G407000	2	112	0.0279554	1.47469	7.66e-15	4.97283	up
TraesCS1A01G409900	295	121	7.95567	3.12569	0.00743761	-1.31023	down
TraesCS1A01G411200	188	32	6.86726	1.10987	1.5e-08	-2.53295	down
TraesCS1A01G414500	526	78	19.6876	2.62449	1.53e-12	-2.76464	down
TraesCS1A01G415100	603	180	27.8324	6.99883	1.16e-05	-1.77094	down
TraesCS1A01G415700	36	244	0.540545	3.73612	6.82e-10	2.67444	up
TraesCS1A01G416200	704	78	15.2058	1.72744	2.22e-16	-3.1841	down
TraesCS1A01G416500	6	101	0.0870999	1.88796	9.56e-11	3.73248	up
TraesCS1A01G420100	12	88	0.809659	5.22564	1.2e-06	2.69136	up
TraesCS1A01G421200	124	44	4.92296	1.68182	0.00521886	-1.49759	down
TraesCS1A01G421400	0	47	0	2.72876	1.42e-08	4.95441	up
TraesCS1A01G421900	70	20	2.35886	0.748632	0.00399892	-1.76535	down
TraesCS1A01G422900	804	2283	12.2589	33.8276	0.000764791	1.46829	up
TraesCS1A01G423100	1029	62	11.7691	0.751471	0	-4.0546	down
TraesCS1A01G423700	340	138	25.8561	10.1247	0.00554316	-1.32668	down
TraesCS1A01G424100	122	10	3.56962	0.295444	4.41e-11	-3.45245	down
TraesCS1A01G427300	192	554	1.37275	4.16679	0.000660603	1.48579	up
TraesCS1A01G428400	642	198	26.2545	6.86835	2.13e-05	-1.72476	down
TraesCS1A01G431000	70	196	1.25233	3.56977	0.00411309	1.43013	up
TraesCS1A01G431100	77	249	0.447209	1.52299	0.000294511	1.63829	up
TraesCS1A01G431400	899	25	57.4225	1.59838	0	-5.11872	down
TraesCS1A01G432000	259	5	3.20836	0.15928	0	-5.34581	down
TraesCS1A01G433300	139	434	5.52292	21.2801	0.000202554	1.59641	up
TraesCS1A01G433400	233	94	11.4587	4.375	0.00776415	-1.33081	down
TraesCS1A01G433500	325	103	4.35025	1.45485	9.67e-05	-1.67841	down
TraesCS1A01G434100	47	0	2.97413	0	6.59e-09	-4.9889	down
TraesCS1A01G434200	70	0	3.44742	0	1.77e-12	-5.54858	down
TraesCS1A01G435600	0	176	0	3.00705	0	6.82474	up
TraesCS1A01G436200	0	51	0	0.299113	3.17e-09	5.06859	up
TraesCS1A01G437100	0	102	0	2.43754	6.66e-16	6.04693	up
TraesCS1A01G437400	40	128	0.38805	1.20766	0.00210408	1.6059	up
TraesCS1A01G437500	8	344	0.205061	6.98329	0	5.14499	up
TraesCS1A01G438600	214	2084	0.973145	9.21627	0	3.23887	up
TraesCS1A01G439100	0	353	0	10.3132	0	7.82243	up
TraesCS1A01G439300	23	160	0.968067	8.45242	1.18e-08	2.68399	up
TraesCS1A01G439400	14	1114	0.642023	21.2227	0	6.13112	up
TraesCS1A01G439500	14	1251	0.0475265	8.48185	0	6.29823	up
TraesCS1A01G439600	0	69	0	14.3817	6.66e-12	5.49343	up
TraesCS1A01G439700	10	317	0.226075	3.5869	0	4.75273	up
TraesCS1A01G441000	4	76	0.029628	0.560361	2.89e-09	3.77492	up
TraesCS1A01G441100	4	274	0.163965	9.79705	0	5.60382	up
TraesCS1A01G441200	0	95	0	2.49908	3.33e-15	5.94597	up
TraesCS1A01G441400	0	237	0	2.92339	0	7.25077	up
TraesCS1A01G441500	0	49	0	4.95018	6.66e-09	5.01263	up
TraesCS1A01G441600	2	934	0.0168589	7.9138	0	8.01513	up
TraesCS1A01G441800	0	951	0	9.60834	0	9.2482	up
TraesCS1A01G442300	14	203	0.428946	5.37095	1.53e-14	3.68398	up
TraesCS1A01G442400	117	1174	0.386738	3.6865	0	3.27443	up
TraesCS1A01G442500	0	1317	0	11.5677	0	9.71727	up
TraesCS1A01G442600	151	1636	2.26946	22.2676	0	3.38878	up
TraesCS1A01G443000	0	151	0	2.2529	0	6.60581	up
TraesCS1A01G443100	21	136	0.412611	2.54989	1.24e-07	2.5747	up
TraesCS1A01G443200	256	1576	2.63986	16.1832	3.96e-12	2.57927	up
TraesCS1A01G443400	2	442	0.0422548	6.93557	0	6.93844	up
TraesCS1A01G443700	2	137	1.78917	68.864	0	5.25987	up
TraesCS1A01G444200	4215	1508	87.7104	34.743	0.000454965	-1.51755	down
TraesCS1A01G444300	209	0	16.2208	0	0	-7.10601	down
TraesCS1A01G444500	74	10	1.03	0.139009	2.29e-06	-2.7427	down
TraesCS1A01G445600	303	91	1.30072	0.411758	4.3e-05	-1.75364	down
TraesCS1B01G000600	17	283	6.27738	85.1834	0	3.90535	up
TraesCS1B01G000800	2134	196	46.6848	4.78619	0	-3.46981	down
TraesCS1B01G000900	224	27	5.91268	0.761196	8.9e-12	-3.01654	down
TraesCS1B01G001000	629	190	5.30548	1.63638	1.41e-05	-1.75434	down
TraesCS1B01G001700	2252	396	48.1694	8.43491	4.49e-12	-2.53854	down
TraesCS1B01G001900	0	786	0	16.9956	0	8.97378	up
TraesCS1B01G002900	342	1	1.97493	0.00657866	0	-7.10015	down
TraesCS1B01G004100	29	174	0.405855	2.57511	5.99e-08	2.48818	up
TraesCS1B01G005000	10	311	0.103018	10.4781	0	4.7253	up
TraesCS1B01G005600	126	331	3.70052	26.3771	0.00487121	1.3472	up
TraesCS1B01G006500	0	1732	0	10.0505	0	10.112	up
TraesCS1B01G007100	0	3020	0	59.3825	0	10.9136	up
TraesCS1B01G007300	0	48	0	0.920992	9.7e-09	4.98381	up
TraesCS1B01G007400	0	575	0	5.45474	0	8.52386	up
TraesCS1B01G007700	12	131	0.316815	3.20561	2.11e-10	3.25705	up
TraesCS1B01G008200	117	523	2.6815	12.11	1.07e-07	2.11027	up
TraesCS1B01G008500	0	2547	0	15.1236	0	10.668	up
TraesCS1B01G008800	0	3289	0	16.8594	0	11.0366	up
TraesCS1B01G009000	0	201	0	1.19489	0	7.01477	up
TraesCS1B01G009100	0	216	0	3.58012	0	7.11783	up
TraesCS1B01G012000	0	36	0	0.164037	1.18e-06	4.58389	up
TraesCS1B01G013900	186	41	3.22106	0.778469	1.18e-06	-2.17494	down
TraesCS1B01G016400	1226	162	11.6673	1.40276	2.44e-15	-2.94343	down
TraesCS1B01G016800	38	7	7.38846	1.19944	0.00422387	-2.24174	down
TraesCS1B01G017900	32	134	1.42212	5.85385	5.4e-05	1.97993	up
TraesCS1B01G018400	137	48	1.80196	0.632359	0.00340937	-1.51837	down
TraesCS1B01G019700	333	22	12.1449	0.788044	0	-3.86295	down
TraesCS1B01G019800	5717	1452	211.39	52.0252	1.4e-07	-2.01167	down
TraesCS1B01G020600	847	3799	8.29693	39.2954	1.76e-08	2.12756	up
TraesCS1B01G020700	485	1829	4.34225	16.9914	1.44e-06	1.87607	up
TraesCS1B01G020900	216	0	4.46471	0	0	-7.1532	down
TraesCS1B01G021200	6	78	0.162208	2.54083	2.73e-08	3.36615	up
TraesCS1B01G022300	1594	5712	17.1097	65.0367	6.23e-06	1.80473	up
TraesCS1B01G022400	655	31	7.83769	0.396126	0	-4.36902	down
TraesCS1B01G022700	104	322	2.12278	5.77018	0.000363324	1.58081	up
TraesCS1B01G022900	21	251	0.286482	4.0732	2.02e-14	3.45123	up
TraesCS1B01G024300	46	211	1.05718	5.04362	1.58e-06	2.12543	up
TraesCS1B01G024800	53	358	2.93955	18.0157	5.91e-11	2.68556	up
TraesCS1B01G031000	0	81	0	3.45302	1.7e-13	5.72	up
TraesCS1B01G032500	34	102	0.332385	0.977804	0.0088434	1.5079	up
TraesCS1B01G032700	8	60	0.106344	0.768531	3.01e-05	2.65624	up
TraesCS1B01G034500	0	156	0	0.742262	0	6.65234	up
TraesCS1B01G035600	0	35	0	0.216014	1.8e-06	4.54497	up
TraesCS1B01G036900	229	3	10.8588	0.154514	0	-5.69336	down
TraesCS1B01G037000	92	23	1.77174	0.38634	0.000273826	-1.96434	down
TraesCS1B01G037900	141	373	2.71185	6.29159	0.00390775	1.35835	up
TraesCS1B01G041300	950	338	15.2033	5.62526	0.000304944	-1.52218	down
TraesCS1B01G043600	151	15	3.0808	0.33852	3.07e-11	-3.23837	down
TraesCS1B01G044300	21	101	0.311854	1.37651	4.37e-05	2.15113	up
TraesCS1B01G044400	98	5	0.687335	0.042697	1.49e-11	-3.95755	down
TraesCS1B01G045400	51	511	0.575411	6.01381	6.66e-16	3.25095	up
TraesCS1B01G050600	301	50	7.88646	1.29476	4.28e-10	-2.58819	down
TraesCS1B01G052800	680	240	23.1721	7.7126	0.000297568	-1.53198	down
TraesCS1B01G054800	44	3	0.435743	0.0370712	6.91e-06	-3.35325	down
TraesCS1B01G056400	0	75	0	1.7116	1.02e-12	5.61116	up
TraesCS1B01G056500	8	42	0.136046	0.681336	0.00465453	2.15731	up
TraesCS1B01G056900	72	4	1.42211	0.0884914	3.48e-09	-3.7591	down
TraesCS1B01G059000	29	236	1.28492	9.72954	3.25e-11	2.92449	up
TraesCS1B01G059900	5084	1714	61.3886	22.8609	0.000136558	-1.60334	down
TraesCS1B01G062300	12	69	0.146252	0.825026	8.83e-05	2.34739	up
TraesCS1B01G062400	376	1900	24.1412	115.932	8.01e-10	2.29691	up
TraesCS1B01G062600	0	50	0	0.99754	4.58e-09	5.04088	up
TraesCS1B01G063600	42	0	5.85822	0	4.92e-08	-4.83202	down
TraesCS1B01G063800	64	1	7.89742	0.135827	1.68e-10	-4.70991	down
TraesCS1B01G066600	36	0	0.98927	0	6.26e-07	-4.61805	down
TraesCS1B01G067800	92	1	1.40097	0.0187547	3.57e-14	-5.22319	down
TraesCS1B01G068000	425	135	2.20116	0.771679	6.37e-05	-1.67866	down
TraesCS1B01G074300	14	58	0.742399	3.01269	0.00413384	1.90398	up
TraesCS1B01G076100	34	1	0.426174	0.0150402	1.31e-05	-3.82675	down
TraesCS1B01G077000	12	77	0.873287	4.89296	1.39e-05	2.50232	up
TraesCS1B01G086800	77	209	2.31939	6.08552	0.0056071	1.38737	up
TraesCS1B01G089000	537	54	17.5353	1.66658	2.22e-16	-3.31236	down
TraesCS1B01G090000	263	87	4.656	1.6071	0.000307493	-1.61421	down
TraesCS1B01G090800	0	315	0	6.47558	0	7.65888	up
TraesCS1B01G092000	77	11	0.86434	0.132895	2.66e-06	-2.67926	down
TraesCS1B01G093400	830	229	13.8791	4.39809	1.48e-06	-1.88621	down
TraesCS1B01G093600	27	116	0.269553	1.10488	7.92e-05	2.00739	up
TraesCS1B01G093800	49	314	0.353886	2.41747	3.85e-10	2.60716	up
TraesCS1B01G093900	119	12	0.885609	0.156079	6.54e-10	-3.18688	down
TraesCS1B01G095300	36	7	0.48032	0.0887575	0.00793443	-2.16683	down
TraesCS1B01G096300	12	70	0.714132	3.67184	6.99e-05	2.36769	up
TraesCS1B01G100400	169	514	3.40838	9.18206	0.000270642	1.56052	up
TraesCS1B01G101500	346	1556	14.6807	61.443	1.96e-08	2.12847	up
TraesCS1B01G102000	59	216	13.8088	44.4094	5.91e-05	1.81015	up
TraesCS1B01G102700	884	2341	13.645	38.0918	0.00300628	1.36786	up
TraesCS1B01G104700	68	5	1.38411	0.111627	4.71e-08	-3.44004	down
TraesCS1B01G105000	0	148	0	0.978827	0	6.57716	up
TraesCS1B01G109700	0	1382	0	21.2368	0	9.7867	up
TraesCS1B01G111200	595	167	12.6444	3.36739	3.22e-06	-1.8589	down
TraesCS1B01G113700	74	2	6.4331	0.192351	5.91e-11	-4.44009	down
TraesCS1B01G117400	597	3591	33.0607	187.058	4.2e-12	2.5499	up
TraesCS1B01G117500	640	3144	14.0001	93.5662	1.47e-09	2.25811	up
TraesCS1B01G118300	14	71	0.299982	0.824457	0.000227615	2.18879	up
TraesCS1B01G119100	141	462	1.67463	6.33901	7.68e-05	1.6659	up
TraesCS1B01G120300	231	637	9.8829	26.6336	0.00136563	1.42181	up
TraesCS1B01G120600	483	1368	21.4825	59.1877	0.000726985	1.46344	up
TraesCS1B01G120700	14	57	4.89171	16.59	0.00517403	1.87956	up
TraesCS1B01G125600	2	65	0.0321024	1.08126	2.43e-09	4.20216	up
TraesCS1B01G125800	8	74	0.495332	4.03564	7.62e-07	2.95184	up
TraesCS1B01G130000	81	274	0.986285	3.35297	0.000112977	1.70382	up
TraesCS1B01G130200	177	51	4.00047	1.21003	0.000102364	-1.79956	down
TraesCS1B01G132000	47	3	5.21506	0.366449	2.36e-06	-3.44531	down
TraesCS1B01G132400	4	100	0.0959196	1.60818	5.88e-12	4.16384	up
TraesCS1B01G133300	40	203	0.747143	3.99489	3.51e-07	2.26478	up
TraesCS1B01G134500	4	344	0.018004	2.23408	0	5.93038	up
TraesCS1B01G135400	53	4	0.71969	0.0639595	1.26e-06	-3.3278	down
TraesCS1B01G138900	239	1	6.46891	0.0373331	0	-6.58592	down
TraesCS1B01G141700	1485	4039	26.839	69.8884	0.00228105	1.40699	up
TraesCS1B01G143400	10	48	0.150857	0.708022	0.00381599	2.06857	up
TraesCS1B01G145300	126	21	3.37315	0.539562	2.25e-07	-2.53419	down
TraesCS1B01G147400	40	4	0.956557	0.107219	0.000109561	-2.93489	down
TraesCS1B01G148600	0	216	0	6.80501	0	7.11783	up
TraesCS1B01G152000	12	876	0.177711	14.4344	0	5.98384	up
TraesCS1B01G153200	36	107	0.762726	1.96344	0.00849417	1.49691	up
TraesCS1B01G154900	38	0	1.54353	0	2.64e-07	-4.69296	down
TraesCS1B01G157700	55	197	0.66959	3.23561	0.000111728	1.77695	up
TraesCS1B01G158000	503	78	29.2033	4.23737	5.66e-12	-2.70033	down
TraesCS1B01G159800	911	382	25.9572	14.0886	0.00638655	-1.28602	down
TraesCS1B01G160700	4	58	0.102662	0.917052	5.55e-07	3.39399	up
TraesCS1B01G161300	196	728	3.19114	12.4345	3.47e-06	1.84936	up
TraesCS1B01G164000	306	979	7.53076	24.5744	6.59e-05	1.63727	up
TraesCS1B01G165500	59	11	0.972136	0.194565	0.000241689	-2.30366	down
TraesCS1B01G168800	70	195	0.529137	1.48302	0.00445296	1.42281	up
TraesCS1B01G170100	119	0	6.84158	0	0	-6.30137	down
TraesCS1B01G173200	107	32	13.9407	2.47605	0.00110117	-1.7286	down
TraesCS1B01G176200	59	160	2.21933	5.57369	0.00927055	1.38082	up
TraesCS1B01G177800	111	37	2.00656	0.985042	0.00346441	-1.58049	down
TraesCS1B01G182300	376	76	8.76217	1.69956	8.71e-09	-2.3187	down
TraesCS1B01G186300	498	142	16.3007	4.38185	5.9e-06	-1.83447	down
TraesCS1B01G187500	417	176	9.04225	3.51726	0.00869202	-1.27259	down
TraesCS1B01G189500	0	36	0.000262165	0.410313	1.18e-06	4.58389	up
TraesCS1B01G190900	34	184	0.771937	3.57201	2.15e-07	2.34927	up
TraesCS1B01G194100	323	116	16.4768	5.8204	0.0008359	-1.50049	down
TraesCS1B01G194300	811	231	62.1041	17.0568	3.09e-06	-1.8404	down
TraesCS1B01G194900	327	80	25.1871	5.84206	7.35e-07	-2.04559	down
TraesCS1B01G195500	8	164	3.50053	60.9767	5.66e-15	4.08344	up
TraesCS1B01G196200	184	32	3.28289	0.658633	2.5e-08	-2.50217	down
TraesCS1B01G200600	789	120	78.3032	11.5061	5.36e-13	-2.7367	down
TraesCS1B01G201400	201	497	3.81457	9.49464	0.00932897	1.26404	up
TraesCS1B01G203300	297	109	2.82367	0.99396	0.00134012	-1.46858	down
TraesCS1B01G204900	344	82	5.14334	1.24128	3.72e-07	-2.08343	down
TraesCS1B01G216000	389	151	30.6088	11.0413	0.00242595	-1.39161	down
TraesCS1B01G216400	83	21	3.17606	0.781645	0.000531336	-1.94088	down
TraesCS1B01G217600	460	1154	14.127	39.9332	0.0066621	1.28849	up
TraesCS1B01G220000	477	147	6.45622	2.40578	3e-05	-1.72312	down
TraesCS1B01G221900	0	38	0	0.718194	5.08e-07	4.65873	up
TraesCS1B01G222100	0	185	0	2.75858	0	6.89607	up
TraesCS1B01G224500	94	31	4.5407	1.38618	0.0053224	-1.58817	down
TraesCS1B01G225300	1087	311	16.776	5.13438	2.75e-06	-1.83577	down
TraesCS1B01G225700	77	2	2.87119	0.0688877	2.41e-11	-4.49628	down
TraesCS1B01G227600	0	50	0	0.598962	4.58e-09	5.04088	up
TraesCS1B01G227700	83	257	1.00809	2.96061	0.000548919	1.57741	up
TraesCS1B01G228800	244	85	9.91577	3.06338	0.000818529	-1.53963	down
TraesCS1B01G232700	91	15	4.06913	0.667563	2.73e-06	-2.51725	down
TraesCS1B01G233800	34	5	1.17414	0.193714	0.00272527	-2.47141	down
TraesCS1B01G242300	286	69	13.5422	3.17436	8.89e-07	-2.06227	down
TraesCS1B01G242700	94	14	3.51446	0.499465	6.74e-07	-2.65311	down
TraesCS1B01G243700	963	361	4.22326	1.849	0.000837619	-1.4472	down
TraesCS1B01G249000	9320	3060	368.236	117.61	0.000104036	-1.64192	down
TraesCS1B01G249400	0	378	0	3.5504	0	7.92073	up
TraesCS1B01G251300	413	11	2.0843	0.0743182	0	-5.07945	down
TraesCS1B01G251400	173	0	2.16295	0	0	-6.83546	down
TraesCS1B01G256100	74	12	2.0936	0.3489	1.26e-05	-2.5126	down
TraesCS1B01G258800	1134	2994	59.2368	164.383	0.00352111	1.36384	up
TraesCS1B01G259500	134	543	0.819605	3.60495	8.26e-07	1.97089	up
TraesCS1B01G259600	220	24	5.60573	0.735398	1.85e-12	-3.15079	down
TraesCS1B01G259700	841	0	23.8106	0	0	-9.10673	down
TraesCS1B01G260000	94	7	2.00866	0.125043	6.32e-10	-3.51479	down
TraesCS1B01G260600	594	191	33.2952	10.0684	5.35e-05	-1.66444	down
TraesCS1B01G261300	49	1	1.07891	0.0310755	3.31e-08	-4.33488	down
TraesCS1B01G262500	42	195	0.807911	3.5096	1.88e-06	2.13937	up
TraesCS1B01G263100	331	56	14.9941	2.35735	3.61e-10	-2.5658	down
TraesCS1B01G263500	34	0	1.58274	0	1.51e-06	-4.53904	down
TraesCS1B01G263700	644	271	5.7199	2.63503	0.00700488	-1.2795	down
TraesCS1B01G264400	19	144	0.314578	2.39418	8.67e-09	2.79037	up
TraesCS1B01G265200	38	0	3.07148	0	2.64e-07	-4.69296	down
TraesCS1B01G266900	6	35	0.082909	0.473115	0.00779723	2.24451	up
TraesCS1B01G268300	64	218	1.66018	5.37081	0.000180421	1.70885	up
TraesCS1B01G268500	149	399	1.92415	5.15742	0.00303782	1.37638	up
TraesCS1B01G269100	607	34	36.1884	1.9771	0	-4.13236	down
TraesCS1B01G269500	950	121	38.2498	6.28496	2.11e-15	-2.99231	down
TraesCS1B01G270300	475	194	7.04904	2.79706	0.00481086	-1.32053	down
TraesCS1B01G271300	244	64	6.13906	6.04165	7.19e-06	-1.94048	down
TraesCS1B01G274300	530	68	15.0314	2.10652	4.14e-14	-2.96931	down
TraesCS1B01G274500	0	222	0	7.37899	0	7.15708	up
TraesCS1B01G275000	199	44	7.12382	0.922576	8.84e-07	-2.17339	down
TraesCS1B01G275700	79	24	0.583883	0.203479	0.00434104	-1.69087	down
TraesCS1B01G276500	893	249	1373.73	297.645	1.76e-06	-1.87156	down
TraesCS1B01G276700	0	43	0	47.6652	6.71e-08	4.83041	up
TraesCS1B01G279200	742	224	13.123	3.48413	1.19e-05	-1.75646	down
TraesCS1B01G281200	1408	520	106.688	37.9916	0.000622798	-1.46991	down
TraesCS1B01G283300	98	278	8.66576	23.1904	0.00187329	1.45439	up
TraesCS1B01G285900	0	52	2.71e-07	1.51376	2.19e-09	5.09578	up
TraesCS1B01G288200	162	54	3.67584	1.14729	0.00111756	-1.59288	down
TraesCS1B01G288800	896	370	9.24789	3.87892	0.00490342	-1.30796	down
TraesCS1B01G289000	47	11	2.53328	0.616931	0.00557614	-1.98487	down
TraesCS1B01G296600	886	141	44.3776	6.98813	1.26e-12	-2.67378	down
TraesCS1B01G297900	128	42	4.33667	1.26977	0.00182113	-1.6076	down
TraesCS1B01G299000	111	4	3.61157	0.146188	1.29e-13	-4.37301	down
TraesCS1B01G308300	0	80	0.00045057	1.22162	2.29e-13	5.70242	up
TraesCS1B01G308900	5503	1946	96.5066	34.2695	0.000405204	-1.53457	down
TraesCS1B01G309000	2410	6393	64.9713	165.18	0.00477351	1.37127	up
TraesCS1B01G309100	25	96	1.79754	6.30105	0.000745847	1.84323	up
TraesCS1B01G316100	64	196	6.46343	17.9526	0.00116991	1.55653	up
TraesCS1B01G316200	241	58	2.76257	0.655739	1.63e-06	-2.06121	down
TraesCS1B01G318600	179	30	3.17323	0.715602	1.65e-08	-2.55139	down
TraesCS1B01G318800	139	43	1.62689	0.395235	0.000648025	-1.69245	down
TraesCS1B01G320500	2	61	0.0120022	0.36477	8.62e-09	4.11275	up
TraesCS1B01G321600	224	40	7.56008	1.3152	1.07e-08	-2.47544	down
TraesCS1B01G321900	218	1319	4.29696	26.8931	8.44e-12	2.55305	up
TraesCS1B01G322200	10	74	0.767201	2.41535	5.25e-06	2.67695	up
TraesCS1B01G323200	49	7	4.89192	0.647257	0.000138445	-2.59595	down
TraesCS1B01G324000	92	348	0.530752	2.1853	8.71e-06	1.86647	up
TraesCS1B01G326200	4	91	0.207299	4.27028	5.45e-11	4.02998	up
TraesCS1B01G326600	147	56	13.0979	4.70852	0.00817123	-1.40306	down
TraesCS1B01G326800	27	163	3.3046	17.8899	8.65e-08	2.49258	up
TraesCS1B01G329500	6	74	0.146654	0.914439	7.84e-08	3.29174	up
TraesCS1B01G330000	19	95	0.617682	2.97337	4.09e-05	2.19829	up
TraesCS1B01G331300	533	221	28.0307	11.2059	0.00582455	-1.29965	down
TraesCS1B01G333300	2162	632	25.0179	7.33435	3.89e-06	-1.80744	down
TraesCS1B01G335100	822	0	25.5057	0	0	-9.07382	down
TraesCS1B01G335600	66	401	1.21	7.62488	3.16e-10	2.54004	up
TraesCS1B01G335800	64	1	1.1532	0.0214283	1.68e-10	-4.70991	down
TraesCS1B01G335900	126	8	2.47443	0.0847037	1.77e-12	-3.77232	down
TraesCS1B01G336600	1489	7	14.2009	0.0753548	0	-7.47854	down
TraesCS1B01G337300	0	87	0	0.574783	3.04e-14	5.82121	up
TraesCS1B01G339500	522	1557	32.3376	74.2459	0.000261408	1.53826	up
TraesCS1B01G341600	19	164	0.230247	1.92227	3.89e-10	2.97611	up
TraesCS1B01G341900	190	1465	18.1896	133.042	6.66e-15	2.90119	up
TraesCS1B01G343700	12	1160	0.69995	61.5092	0	6.38833	up
TraesCS1B01G345400	34	4	0.376511	0.0517437	0.000967672	-2.70977	down
TraesCS1B01G346600	235	49	3.49554	0.725356	1.37e-07	-2.26138	down
TraesCS1B01G346700	387	16	8.36249	0.307201	0	-4.50275	down
TraesCS1B01G347400	79	215	2.74338	7.36231	0.00515613	1.39162	up
TraesCS1B01G350600	817	322	6.49177	2.72173	0.00216742	-1.37459	down
TraesCS1B01G350700	293	0	8.74316	0	0	-7.59041	down
TraesCS1B01G351000	77	0	12.3914	0	1.92e-13	-5.68328	down
TraesCS1B01G351200	126	0	12.3377	0	0	-6.38282	down
TraesCS1B01G352400	278	25	3.93755	0.349508	4.33e-15	-3.43094	down
TraesCS1B01G353900	8	429	0.321547	15.4687	0	5.46226	up
TraesCS1B01G354900	8	58	0.25304	1.65509	5.18e-05	2.6086	up
TraesCS1B01G356600	762	208	13.0214	3.18534	1.27e-06	-1.9009	down
TraesCS1B01G357700	0	34	0	0.306735	2.76e-06	4.50496	up
TraesCS1B01G360700	62	223	0.526132	2.25336	7.12e-05	1.78605	up
TraesCS1B01G361200	23	119	1.91637	9.1584	6.42e-06	2.26169	up
TraesCS1B01G361400	425	102	14.6282	3.34329	2.26e-07	-2.07771	down
TraesCS1B01G361500	132	475	4.90035	16.6645	1.21e-05	1.79991	up
TraesCS1B01G362100	0	151	8.13e-55	4.05256	0	6.60581	up
TraesCS1B01G363500	94	1	1.59598	0.0202626	2.08e-14	-5.25372	down
TraesCS1B01G363700	96	0	10.3744	1.63e-05	7.77e-16	-5.99589	down
TraesCS1B01G364200	124	503	5.19503	20.0414	9.41e-07	1.97141	up
TraesCS1B01G368200	66	286	1.08924	4.95952	1.24e-06	2.05471	up
TraesCS1B01G368300	19	187	1.22519	11.3274	1.37e-11	3.16377	up
TraesCS1B01G372400	100	18	1.54815	0.281787	3.57e-06	-2.41105	down
TraesCS1B01G372800	25	610	0.367845	8.50115	0	4.49129	up
TraesCS1B01G374700	89	270	7.96052	22.8034	0.000690042	1.54924	up
TraesCS1B01G377300	89	28	21.0515	5.73563	0.00391959	-1.65003	down
TraesCS1B01G377500	27	278	0.142337	1.49392	9.39e-14	3.25711	up
TraesCS1B01G379300	1616	430	73.3798	18.0204	4.14e-07	-1.94176	down
TraesCS1B01G380100	14	71	0.114165	0.585336	0.000227615	2.18879	up
TraesCS1B01G380600	4	65	0.291007	4.40945	6.7e-08	3.55428	up
TraesCS1B01G381200	126	0	6.48833	0	0	-6.38282	down
TraesCS1B01G381300	10	60	0.229773	1.86209	0.000170412	2.38135	up
TraesCS1B01G382200	625	169	18.832	4.88155	1.34e-06	-1.91267	down
TraesCS1B01G384300	520	63	13.0905	1.51676	1.13e-14	-3.04951	down
TraesCS1B01G385000	102	24	3.00338	0.696721	7.77e-05	-2.05333	down
TraesCS1B01G385100	44	4	1.4342	0.144134	2.67e-05	-3.06756	down
TraesCS1B01G385300	104	24	3.6705	0.823643	5.51e-05	-2.08093	down
TraesCS1B01G386900	20	130	2.39358	14.6044	1.7e-07	2.57587	up
TraesCS1B01G387100	70	1	606.711	7.25447	2.39e-11	-4.8363	down
TraesCS1B01G390000	96	614	0.894101	5.97724	1.51e-11	2.6224	up
TraesCS1B01G390800	49	0	0.412327	0	3.02e-09	-5.04716	down
TraesCS1B01G394500	98	4	88.3054	3.61454	3.03e-12	-4.19591	down
TraesCS1B01G395100	582	125	4.48007	0.980578	8.16e-09	-2.24053	down
TraesCS1B01G395400	98	316	5.34654	12.0369	0.000188732	1.63826	up
TraesCS1B01G407300	53	3	0.652078	0.0426966	2.94e-07	-3.61349	down
TraesCS1B01G409600	21	356	0.852816	14.4427	0	3.95278	up
TraesCS1B01G409700	42	173	3.35871	1.91781	2.14e-05	1.96813	up
TraesCS1B01G410300	282	4203	8.80253	134.588	0	3.85477	up
TraesCS1B01G410800	605	1545	10.4885	27.8037	0.00515436	1.3148	up
TraesCS1B01G411100	137	355	2.32077	5.72341	0.0056167	1.32837	up
TraesCS1B01G411900	460	133	9.61712	2.75982	8.96e-06	-1.81372	down
TraesCS1B01G414800	117	30	4.02814	0.962824	0.000111229	-1.94439	down
TraesCS1B01G415100	122	316	3.45304	8.37438	0.0063046	1.32659	up
TraesCS1B01G415200	1609	554	23.4271	8.44262	0.000150196	-1.57113	down
TraesCS1B01G418400	59	196	2.08245	5.71302	0.000355115	1.67103	up
TraesCS1B01G418800	924	6630	46.0666	250.016	1.63e-14	2.80538	up
TraesCS1B01G420000	64	240	2.40228	8.8922	2.86e-05	1.84661	up
TraesCS1B01G420100	1699	479	425.26	105.379	1.66e-06	-1.8588	down
TraesCS1B01G424700	149	15	1.68059	0.174361	4.32e-11	-3.21932	down
TraesCS1B01G425000	96	11	5.8668	0.66672	3.2e-08	-2.99187	down
TraesCS1B01G425700	164	447	24.63	57.6016	0.00207485	1.40262	up
TraesCS1B01G428800	205	11	8.22791	0.53163	1.11e-16	-4.07432	down
TraesCS1B01G431300	25	158	0.13591	0.857897	5.46e-08	2.55293	up
TraesCS1B01G436500	1038	70	124.989	8.02719	0	-3.89613	down
TraesCS1B01G439000	83	0	0.557308	0	3.11e-14	-5.78951	down
TraesCS1B01G439200	10	49	0.0601235	0.863651	0.00293711	2.09739	up
TraesCS1B01G439900	327	114	7.86177	2.5579	0.000499752	-1.54292	down
TraesCS1B01G440200	173	61	4.58765	1.55616	0.00205439	-1.51562	down
TraesCS1B01G440800	79	14	7.57302	2.06397	1.79e-05	-2.40668	down
TraesCS1B01G441300	66	9	5.04079	0.655331	7.21e-06	-2.71163	down
TraesCS1B01G441700	19	129	0.437263	2.59701	1.01e-07	2.63348	up
TraesCS1B01G443900	584	1887	26.1833	82.6577	4.91e-05	1.65386	up
TraesCS1B01G444000	0	108	0	19.6079	1.11e-16	6.12818	up
TraesCS1B01G444600	0	75	0	3.46928	1.02e-12	5.61116	up
TraesCS1B01G446500	672	92	14.1815	1.99553	6.24e-14	-2.8833	down
TraesCS1B01G447800	12	58	0.560703	2.40008	0.00120288	2.1029	up
TraesCS1B01G449200	44	137	29.6452	77.8107	0.00240561	1.57012	up
TraesCS1B01G449900	0	324	0	35.0201	0	7.69933	up
TraesCS1B01G450100	145	11	6.40956	0.614301	1.59e-12	-3.57916	down
TraesCS1B01G450300	1267	0	11.6518	0	0	-9.69708	down
TraesCS1B01G451200	2528	1019	143.666	56.4325	0.00398372	-1.34512	down
TraesCS1B01G452400	220	12	8.92189	0.500861	0	-4.065	down
TraesCS1B01G453300	19	75	0.990681	3.67195	0.00178134	1.86348	up
TraesCS1B01G454300	2	58	0.0191977	0.565336	2.28e-08	4.04186	up
TraesCS1B01G454500	488	2286	6.38226	34.6898	5.68e-09	2.18873	up
TraesCS1B01G455100	12	187	0.271946	3.8156	1.87e-14	3.7654	up
TraesCS1B01G455200	1138	121	15.7699	1.53232	0	-3.25242	down
TraesCS1B01G464800	66	313	1.26617	5.79464	1.58e-07	2.18418	up
TraesCS1B01G465700	492	187	5.60783	2.28485	0.00141008	-1.42368	down
TraesCS1B01G466200	261	7625	12.5784	358.128	0	4.82487	up
TraesCS1B01G466300	6	98	0.0689772	1.17468	1.92e-10	3.68965	up
TraesCS1B01G466900	0	72	0	0.902616	2.59e-12	5.5535	up
TraesCS1B01G467400	0	277	0	4.50761	0	7.4744	up
TraesCS1B01G467800	132	7	1.84015	0.12438	1.36e-13	-3.99793	down
TraesCS1B01G468600	79	231	2.29126	6.43795	0.00162357	1.49445	up
TraesCS1B01G468700	117	356	3.11625	7.78085	0.000417168	1.55736	up
TraesCS1B01G469300	104	37	5.05136	1.73271	0.00880471	-1.48784	down
TraesCS1B01G469400	1123	411	15.0723	5.04227	0.000518947	-1.48225	down
TraesCS1B01G469500	2	839	0.0157793	4.49771	0	7.86065	up
TraesCS1B01G472800	134	14	6.76125	0.696582	2.47e-10	-3.15771	down
TraesCS1B01G474000	89	21	24.2749	5.06872	0.000171659	-2.03981	down
TraesCS1B01G479700	96	24	2.87281	0.693367	0.000219675	-1.96719	down
TraesCS1B01G480100	201	43	1.41669	0.314835	4.8e-07	-2.21972	down
TraesCS1B01G480400	383	56	2.03564	0.318401	6.42e-12	-2.77541	down
TraesCS1B01G481300	391	84	9.18751	1.87153	2.77e-08	-2.2333	down
TraesCS1B01G481600	72	0	9.22221	0	9.28e-13	-5.58837	down
TraesCS1D01G000300	64	0	0.365764	0	1.31e-11	-5.42219	down
TraesCS1D01G000600	0	69	0	0.600851	6.66e-12	5.49343	up
TraesCS1D01G001500	2	3465	0.0132802	22.8015	0	9.90473	up
TraesCS1D01G001700	77	749	0.337788	3.48107	1.11e-16	3.22107	up
TraesCS1D01G002500	1327	520	8.53846	3.34481	0.00194312	-1.38453	down
TraesCS1D01G002600	0	561	0	22.6891	0	8.4884	up
TraesCS1D01G002700	0	2897	0	15.4555	0	10.8536	up
TraesCS1D01G002900	0	17795	0	99.4238	0	13.4718	up
TraesCS1D01G003300	6	82	0.279023	4.99332	9.71e-09	3.43692	up
TraesCS1D01G005300	434	131	2.31886	0.788311	2.32e-05	-1.75167	down
TraesCS1D01G010200	79	20	1.74901	0.427802	0.000689646	-1.93633	down
TraesCS1D01G012800	276	49	2.2483	0.424746	2.71e-09	-2.49201	down
TraesCS1D01G013400	40	0	1.80242	0	1.13e-07	-4.76416	down
TraesCS1D01G013600	655	1	23.8712	0.0414072	0	-8.03457	down
TraesCS1D01G015800	102	281	0.937074	2.40465	0.00287952	1.41294	up
TraesCS1D01G017600	267	0	2.07738	9.55e-07	0	-7.45707	down
TraesCS1D01G018100	59	637	1.74611	18.1828	0	3.36353	up
TraesCS1D01G018700	184	2878	1.58778	17.4946	0	3.92052	up
TraesCS1D01G020600	822	201	64.6346	14.9898	9.05e-08	-2.05905	down
TraesCS1D01G020700	265	20	10.1451	0.700069	3.33e-16	-3.66305	down
TraesCS1D01G025000	0	61	0	6.08596	9.25e-11	5.31984	up
TraesCS1D01G026400	0	43	0	2.83961	6.71e-08	4.83041	up
TraesCS1D01G028900	0	391	0	2.52988	0	7.96931	up
TraesCS1D01G029100	0	403	0	2.06749	0	8.01275	up
TraesCS1D01G029200	0	174	0	1.23339	0	6.80839	up
TraesCS1D01G034800	32	263	6.49032	49.338	1.06e-11	2.94456	up
TraesCS1D01G036900	2254	448	155.034	28.3419	1.56e-10	-2.36248	down
TraesCS1D01G037000	216	41	16.1619	2.87338	4e-08	-2.38904	down
TraesCS1D01G038000	94	11	1.46013	0.189201	5.01e-08	-2.96198	down
TraesCS1D01G039300	310	779	5.35067	12.5273	0.00641791	1.28953	up
TraesCS1D01G040400	68	194	0.335561	1.02801	0.00324566	1.45636	up
TraesCS1D01G044300	169	1	3.38844	0.0227852	0	-6.08973	down
TraesCS1D01G044400	318	3	22.3002	0.239282	0	-6.16436	down
TraesCS1D01G048300	6	61	0.170004	1.56527	2.84e-06	3.01938	up
TraesCS1D01G049000	32	117	0.370829	1.425	0.000564608	1.78662	up
TraesCS1D01G049100	32	353	2.01253	21.0274	2.22e-15	3.36698	up
TraesCS1D01G051000	14	60	0.165942	0.406623	0.00263862	1.95163	up
TraesCS1D01G052500	747	80	14.2603	1.47598	0	-3.23363	down
TraesCS1D01G053300	856	223	4.51979	1.21699	3.83e-07	-1.96867	down
TraesCS1D01G067700	260	102	1.68468	0.64622	0.00448601	-1.37203	down
TraesCS1D01G071800	841	121	8.89466	1.37174	9.5e-14	-2.81679	down
TraesCS1D01G072700	149	20	7.80574	1.00562	2.49e-09	-2.8388	down
TraesCS1D01G073000	303	117	10.1941	3.58141	0.002904	-1.3965	down
TraesCS1D01G073900	1245	238	53.0966	6.61484	9.18e-11	-2.41504	down
TraesCS1D01G077400	3007	1086	67.1406	23.3338	0.00047913	-1.50358	down
TraesCS1D01G079400	166	30	1.00449	0.183533	9.5e-08	-2.44357	down
TraesCS1D01G080400	25	88	1.35256	4.32307	0.00275403	1.71981	up
TraesCS1D01G080700	239	96	3.20395	1.03767	0.00705618	-1.33737	down
TraesCS1D01G080800	8	48	0.407358	2.15816	0.00083995	2.34346	up
TraesCS1D01G087700	160	30	4.07539	0.77177	2.17e-07	-2.39095	down
TraesCS1D01G088800	166	49	1.09796	0.350173	0.000183167	-1.76378	down
TraesCS1D01G090000	4	150	0.0627548	2.20164	1.11e-16	4.74137	up
TraesCS1D01G091900	235	0	2.56197	0	0	-7.27401	down
TraesCS1D01G094700	762	11	64.3023	0.954643	0	-5.96066	down
TraesCS1D01G094900	1119	43	78.4828	2.92249	0	-4.6877	down
TraesCS1D01G095400	1815	64	132.354	4.53	0	-4.82771	down
TraesCS1D01G098000	606	2474	33.4348	128.2	2e-07	1.99111	up
TraesCS1D01G103200	124	45	3.27132	1.17731	0.00681411	-1.46627	down
TraesCS1D01G106700	51	187	1.28015	4.58404	9.28e-05	1.80828	up
TraesCS1D01G113900	51	12	0.4576	0.119874	0.00373204	-1.98868	down
TraesCS1D01G115700	72	20	1.46655	0.363753	0.00270493	-1.80513	down
TraesCS1D01G116200	241	0	4.52917	0	0	-7.31015	down
TraesCS1D01G118500	866	317	154.415	51.3116	0.000542692	-1.48094	down
TraesCS1D01G120000	51	297	1.51578	8.26968	3.58e-09	2.47126	up
TraesCS1D01G120100	147	34	4.23518	0.944674	8.53e-06	-2.09777	down
TraesCS1D01G120700	74	22	2.8473	0.813004	0.00458784	-1.71591	down
TraesCS1D01G122400	40	8	3.65324	0.692877	0.00499318	-2.15366	down
TraesCS1D01G123900	149	384	5.20419	13.624	0.0057213	1.32132	up
TraesCS1D01G131500	4157	1725	13.5307	6.57462	0.00871301	-1.30379	down
TraesCS1D01G134200	184	2	2.08478	0.0308863	0	-5.73664	down
TraesCS1D01G140300	119	336	1.63737	5.20496	0.00155371	1.45018	up
TraesCS1D01G140400	391	1102	2.32103	7.00133	0.000797972	1.45568	up
TraesCS1D01G140500	595	34	34.1721	1.83231	0	-4.10363	down
TraesCS1D01G141000	1357	277	48.2952	8.318	4.89e-10	-2.32158	down
TraesCS1D01G142100	1081	413	21.0887	7.60728	0.00119023	-1.42035	down
TraesCS1D01G143600	128	35	3.7554	0.982857	0.000171307	-1.8603	down
TraesCS1D01G144400	460	1244	11.6821	32.0651	0.00174183	1.39669	up
TraesCS1D01G144900	201	63	4.47932	1.34528	0.000249588	-1.68489	down
TraesCS1D01G147700	291	9	3.97921	0.122382	0	-4.82664	down
TraesCS1D01G147800	111	16	1.37871	0.208313	1.02e-07	-2.71502	down
TraesCS1D01G149800	1881	736	102.947	39.2448	0.00203626	-1.38745	down
TraesCS1D01G154300	53	158	1.16614	13.9275	0.00285545	1.51346	up
TraesCS1D01G154900	2624	1107	73.7381	28.6715	0.00939552	-1.27954	down
TraesCS1D01G156900	94	18	1.08705	0.234456	1.15e-05	-2.32317	down
TraesCS1D01G159200	51	0	2.22594	0.000481155	1.41e-09	-5.10316	down
TraesCS1D01G161400	53	173	1.18276	3.80987	0.000652464	1.64308	up
TraesCS1D01G162400	303	62	2.63544	0.514761	2.82e-08	-2.29586	down
TraesCS1D01G162700	23	77	0.812788	2.57875	0.00761151	1.64385	up
TraesCS1D01G164100	128	22	0.808418	0.146502	3.02e-07	-2.49409	down
TraesCS1D01G164600	66	15	1.38361	0.4292	0.000654424	-2.06285	down
TraesCS1D01G164900	0	48	0	1.6677	9.7e-09	4.98381	up
TraesCS1D01G165000	42	170	1.14301	4.38925	3e-05	1.94312	up
TraesCS1D01G166600	1162	3325	11.5704	42.5782	0.000752388	1.4799	up
TraesCS1D01G168200	69	295	0.589558	2.64229	1.42e-06	2.03646	up
TraesCS1D01G168700	233	57	7.96789	1.85235	2.5e-06	-2.03724	down
TraesCS1D01G176000	503	15	30.8647	0.895166	0	-4.96422	down
TraesCS1D01G178200	3	220	0.409903	21.929	0	5.57703	up
TraesCS1D01G178400	100	288	0.65791	1.83165	0.00140447	1.47639	up
TraesCS1D01G178700	1924	5145	102.082	269.174	0.00361086	1.38273	up
TraesCS1D01G179900	2630	30828	77.8631	975.604	0	3.51472	up
TraesCS1D01G181100	117	552	1.25799	6.43583	2.82e-08	2.1879	up
TraesCS1D01G181600	4	62	0.103546	1.59339	1.64e-07	3.48775	up
TraesCS1D01G182600	34	109	1.51629	5.09471	0.00346062	1.60225	up
TraesCS1D01G184500	4647	1249	212.578	53.3779	5.7e-07	-1.92982	down
TraesCS1D01G186000	192	0	2.13634	0	0	-6.98454	down
TraesCS1D01G186100	563	90	12.5043	1.99672	7.15e-12	-2.65978	down
TraesCS1D01G186400	81	27	1.29159	0.441142	0.00985791	-1.56619	down
TraesCS1D01G187700	2534	942	73.6594	26.159	0.00081512	-1.46171	down
TraesCS1D01G187900	166	25	3.67843	0.547073	5.4e-09	-2.69235	down
TraesCS1D01G190000	124	31	6.96741	1.53097	6.02e-05	-1.98218	down
TraesCS1D01G190200	406	25	26.4154	1.60004	0	-3.97485	down
TraesCS1D01G190300	331	114	26.3388	8.61097	0.000399055	-1.56038	down
TraesCS1D01G190500	68	2	4.72298	0.156587	3.76e-10	-4.32067	down
TraesCS1D01G190700	132	43	16.2959	5.23749	0.00150796	-1.61874	down
TraesCS1D01G191100	9817	3405	815.125	275.73	0.000368824	-1.56281	down
TraesCS1D01G192600	49	2	5.00884	0.227487	2.28e-07	-3.86016	down
TraesCS1D01G192800	196	523	1.52346	4.61984	0.00266037	1.37344	up
TraesCS1D01G199100	69	17	0.963486	0.27742	0.00107519	-1.96113	down
TraesCS1D01G201200	4	37	0.0930265	0.837868	0.000560248	2.76683	up
TraesCS1D01G201800	115	407	2.48445	8.24206	2.19e-05	1.77427	up
TraesCS1D01G202300	1478	319	23.144	4.73924	2.01e-09	-2.24207	down
TraesCS1D01G205500	40	4	0.557946	0.0735707	0.000109561	-2.93489	down
TraesCS1D01G205600	44	8	0.922571	0.168862	0.00150723	-2.28633	down
TraesCS1D01G207200	2277	961	103.087	40.811	0.00890489	-1.27877	down
TraesCS1D01G211200	92	258	1.71192	4.83264	0.00249886	1.43701	up
TraesCS1D01G211300	0	52	1.82e-05	0.39087	2.19e-09	5.09578	up
TraesCS1D01G213700	162	41	2.09784	0.556663	2.04e-05	-1.97738	down
TraesCS1D01G214700	2770	389	51.7185	7.64248	3.77e-15	-2.86267	down
TraesCS1D01G215100	36	0	2.18623	0	6.26e-07	-4.61805	down
TraesCS1D01G217700	226	36	7.93649	0.915702	1.26e-09	-2.63415	down
TraesCS1D01G217800	70	14	3.56851	0.684667	0.000138639	-2.2357	down
TraesCS1D01G220500	263	759	14.063	38.1824	0.000553435	1.48803	up
TraesCS1D01G220900	98	10	4.4078	0.455367	7.55e-09	-3.14079	down
TraesCS1D01G223900	12	68	0.126604	0.747701	0.000111613	2.32679	up
TraesCS1D01G224300	166	53	2.8112	0.670873	0.000569266	-1.65394	down
TraesCS1D01G228900	51	10	0.513723	0.104556	0.000958813	-2.21877	down
TraesCS1D01G229600	858	216	29.4653	6.28879	1.71e-07	-2.01771	down
TraesCS1D01G229700	1579	233	25.9025	3.71224	3.73e-14	-2.78796	down
TraesCS1D01G230000	1288	388	40.9662	10.8386	8.27e-06	-1.76253	down
TraesCS1D01G236100	567	41	17.1473	1.33482	0	-3.77507	down
TraesCS1D01G239000	74	4	5.16093	0.295414	1.94e-09	-3.79782	down
TraesCS1D01G244100	64	174	0.724394	1.89087	0.0076242	1.3862	up
TraesCS1D01G244700	271	50	8.4935	1.48457	6.39e-09	-2.43753	down
TraesCS1D01G246000	22	107	2.68335	7.62397	2.7e-05	2.17049	up
TraesCS1D01G248600	12	64	0.104094	0.540683	0.000286807	2.24136	up
TraesCS1D01G249600	235	47	13.403	2.50592	6.39e-08	-2.3196	down
TraesCS1D01G251400	23	76	0.440197	1.3627	0.00902936	1.62537	up
TraesCS1D01G253400	77	203	1.19404	6.72275	0.00870276	1.34566	up
TraesCS1D01G254000	252	75	2.46138	0.767713	5.81e-05	-1.76299	down
TraesCS1D01G256500	83	15	2.13637	0.366271	1.51e-05	-2.38679	down
TraesCS1D01G263800	706	108	17.4971	2.43187	9.36e-13	-2.72661	down
TraesCS1D01G264000	211	712	5.05879	15.6303	2.67e-05	1.71177	up
TraesCS1D01G264500	502	91	18.2995	3.21699	2.39e-10	-2.47914	down
TraesCS1D01G265900	1310	60	214.374	8.98831	0	-4.44859	down
TraesCS1D01G266100	2012	264	152.373	19.6074	6.66e-16	-2.9582	down
TraesCS1D01G268600	575	235	12.4487	4.78129	0.00446071	-1.32077	down
TraesCS1D01G269400	53	8	1.83649	0.26067	0.000106525	-2.54657	down
TraesCS1D01G269600	40	4	1.19483	0.132354	0.000109561	-2.93489	down
TraesCS1D01G271100	51	634	4.01126	47.5897	0	3.56125	up
TraesCS1D01G272600	38	8	2.07531	0.420474	0.00909715	-2.08245	down
TraesCS1D01G273500	14	95	1.29297	7.79187	1.38e-06	2.601	up
TraesCS1D01G276500	74	11	1.22282	0.255851	5.53e-06	-2.62306	down
TraesCS1D01G277300	488	144	6.52005	1.91071	1.22e-05	-1.78534	down
TraesCS1D01G278200	173	56	8.91395	2.80502	0.000614903	-1.63578	down
TraesCS1D01G279200	0	141	0	1.96733	0	6.50801	up
TraesCS1D01G279600	539	171	10.3335	3.07667	4.54e-05	-1.68284	down
TraesCS1D01G280200	871	216	19.982	4.77575	1.17e-07	-2.03937	down
TraesCS1D01G283500	130	45	6.72684	2.13055	0.00338772	-1.53363	down
TraesCS1D01G286100	742	55	55.5033	4.4081	0	-3.75199	down
TraesCS1D01G289800	19	150	0.407109	3.17198	3.35e-09	2.84865	up
TraesCS1D01G290500	143	415	4.47493	13.4845	0.000772048	1.49157	up
TraesCS1D01G292100	2949	907	62.1843	19.2657	1.35e-05	-1.73493	down
TraesCS1D01G297900	113	22	0.493022	0.103449	3.91e-06	-2.31652	down
TraesCS1D01G302500	59	2	1.25358	0.0481005	7.02e-09	-4.12068	down
TraesCS1D01G305100	209	528	11.0324	20.9487	0.00648662	1.29517	up
TraesCS1D01G309200	149	12	2.66146	0.241408	2.28e-12	-3.50754	down
TraesCS1D01G310600	59	11	0.77411	0.208187	0.000241689	-2.30366	down
TraesCS1D01G311000	36	267	1.10177	7.64694	6.54e-11	2.80361	up
TraesCS1D01G312300	8	64	0.611893	2.39508	1.03e-05	2.74705	up
TraesCS1D01G314600	14	75	0.0588416	0.315015	9.47e-05	2.2662	up
TraesCS1D01G314800	363	108	32.1732	9.10237	2.45e-05	-1.76985	down
TraesCS1D01G316600	577	1	3.73584	0.00783881	0	-7.8521	down
TraesCS1D01G320800	500	122	5.83549	1.38904	2.14e-07	-2.05667	down
TraesCS1D01G322000	122	627	2.57627	12.7816	2.8e-09	2.3116	up
TraesCS1D01G323500	36	163	0.637676	2.91947	6.77e-06	2.097	up
TraesCS1D01G324700	14	74	0.0846088	0.474532	0.000117808	2.24723	up
TraesCS1D01G325300	278	789	9.81847	26.7902	0.000745036	1.46427	up
TraesCS1D01G327000	2234	9557	29.1756	140.656	8.61e-08	2.06055	up
TraesCS1D01G327100	72	236	1.57014	5.32502	0.000269286	1.65634	up
TraesCS1D01G327600	156	1052	2.97869	20.9014	6.78e-13	2.70598	up
TraesCS1D01G327900	1057	4399	129.808	156.548	1.32e-07	2.02001	up
TraesCS1D01G330300	17	275	0.165217	3.29634	0	3.86421	up
TraesCS1D01G330600	152	1456	15.2873	137.862	0	3.21136	up
TraesCS1D01G331400	11	50	0.548332	2.19043	0.00445479	2.00563	up
TraesCS1D01G332000	308	12	11.5367	0.491491	0	-4.54758	down
TraesCS1D01G333100	291	761	3.40769	7.17964	0.00326701	1.34666	up
TraesCS1D01G333500	203	1288	11.4166	64.8871	2.35e-12	2.62089	up
TraesCS1D01G333800	107	366	2.07022	7.28356	5.04e-05	1.72431	up
TraesCS1D01G335300	47	0	1.71826	1.33e-05	6.59e-09	-4.9889	down
TraesCS1D01G335900	145	42	3.28851	1.14632	0.000227328	-1.78551	down
TraesCS1D01G338000	2	85	0.0566857	2.1534	7.1e-12	4.58117	up
TraesCS1D01G340600	1040	378	95.1979	18.23	0.00045646	-1.4919	down
TraesCS1D01G341300	92	245	0.486172	1.36501	0.00572188	1.36288	up
TraesCS1D01G341600	1001	2635	14.1292	28.2572	0.00352703	1.35939	up
TraesCS1D01G341800	19	68	0.234044	0.775572	0.00680159	1.72516	up
TraesCS1D01G342000	2	184	0.0163737	1.49895	0	5.68123	up
TraesCS1D01G342100	122	20	1.70509	0.266785	2.33e-07	-2.55361	down
TraesCS1D01G344300	10	272	0.258854	8.19774	0	4.53303	up
TraesCS1D01G344400	2	36	0.566283	3.87546	5.72e-05	3.37681	up
TraesCS1D01G345100	400	1286	4.00895	17.5651	5.53e-05	1.64545	up
TraesCS1D01G345500	72	7	12.4555	1.11763	1.82e-07	-3.13716	down
TraesCS1D01G350100	189	735	6.95388	26.0908	1.26e-06	1.91519	up
TraesCS1D01G350400	23	183	0.852091	6.36945	4.65e-10	2.876	up
TraesCS1D01G350500	87	20	2.138	0.460587	0.000146646	-2.07297	down
TraesCS1D01G350700	4	54	0.328756	3.76927	1.94e-06	3.2937	up
TraesCS1D01G352000	68	0	7.41763	9.75e-06	3.42e-12	-5.50767	down
TraesCS1D01G352600	117	333	3.08454	8.18434	0.00138229	1.46144	up
TraesCS1D01G355100	83	1933	9.9051	218.593	0	4.48081	up
TraesCS1D01G356400	18	154	0.344737	2.89268	8.32e-10	2.95827	up
TraesCS1D01G357500	151	35	3.33535	0.782012	7.65e-06	-2.09611	down
TraesCS1D01G359400	0	155	0	4.12766	0	6.64315	up
TraesCS1D01G360400	8	584	0.116474	7.83331	0	5.90586	up
TraesCS1D01G360500	12	480	0.179826	6.57381	0	5.11807	up
TraesCS1D01G361300	87	7	1.4731	0.122286	3.57e-09	-3.405	down
TraesCS1D01G363400	53	7	0.120131	0.0167262	4.14e-05	-2.70586	down
TraesCS1D01G370100	47	11	21.6934	4.78411	0.00557614	-1.98487	down
TraesCS1D01G370300	714	94	21.0131	2.54942	1.68e-14	-2.94006	down
TraesCS1D01G374100	74	311	8.64054	33.9026	1.64e-06	2.01345	up
TraesCS1D01G374300	90	30	0.86984	0.328245	0.00690003	-1.57145	down
TraesCS1D01G375500	64	18	0.968501	0.290954	0.00516282	-1.77936	down
TraesCS1D01G375900	10	131	0.108011	1.11475	2.55e-11	3.48785	up
TraesCS1D01G380100	47	4	0.998076	0.0954815	9.48e-06	-3.15962	down
TraesCS1D01G380900	55	187	4.33092	14.2485	0.000288086	1.70241	up
TraesCS1D01G388100	173	0	9.79943	0	0	-6.83546	down
TraesCS1D01G389300	160	37	2.93394	0.757689	5.49e-06	-2.10199	down
TraesCS1D01G391400	21	271	1.31885	16.5639	2.11e-15	3.56118	up
TraesCS1D01G391600	109	354	3.93851	9.67445	0.000135858	1.65008	up
TraesCS1D01G392000	77	947	5.03808	40.0061	0	3.55884	up
TraesCS1D01G392500	62	659	0.946044	9.65659	0	3.34261	up
TraesCS1D01G392600	70	18	0.843263	0.405375	0.00149106	-1.90576	down
TraesCS1D01G395200	184	22	7.74406	0.861729	5.38e-11	-3.01246	down
TraesCS1D01G398700	2018	6857	244.642	801.93	2.41e-05	1.72826	up
TraesCS1D01G399900	14	109	0.0968114	0.752841	8.46e-08	2.79632	up
TraesCS1D01G404400	428	181	4.84023	2.05689	0.00883067	-1.26996	down
TraesCS1D01G404700	70	4	4.21734	0.263423	6.26e-09	-3.71931	down
TraesCS1D01G407200	57	286	0.618956	5.54581	7.8e-08	2.26107	up
TraesCS1D01G410600	149	48	1.75575	0.558636	0.000893222	-1.63822	down
TraesCS1D01G414600	368	114	11.5864	3.28983	5.06e-05	-1.71259	down
TraesCS1D01G415200	51	4	2.28412	0.200458	2.45e-06	-3.27389	down
TraesCS1D01G421400	44	166	6.44765	22.5813	9.34e-05	1.84428	up
TraesCS1D01G422600	109	25	16.3525	3.70883	3.91e-05	-2.09236	down
TraesCS1D01G423800	1552	362	31.9526	7.79913	1.5e-08	-2.13088	down
TraesCS1D01G428600	53	265	4.54227	20.936	1.18e-07	2.2538	up
TraesCS1D01G429200	644	57	14.14	1.24541	0	-3.49796	down
TraesCS1D01G431200	633	2545	9.33419	36.5515	2.94e-07	1.96917	up
TraesCS1D01G431700	1524	413	10.8742	3.1327	6.58e-07	-1.91526	down
TraesCS1D01G435800	38	5	1.38393	0.198581	0.000676506	-2.62533	down
TraesCS1D01G436800	194	1126	3.0406	16.4608	3.46e-11	2.49214	up
TraesCS1D01G437200	21	105	0.35315	1.76753	2.18e-05	2.20632	up
TraesCS1D01G437700	128	583	4.20144	20.5196	5.47e-08	2.13848	up
TraesCS1D01G439000	355	2441	11.3238	62.0932	9.3e-14	2.74069	up
TraesCS1D01G439400	0	41	0	0.763662	1.49e-07	4.76416	up
TraesCS1D01G439500	17	313	0.354917	6.31402	0	4.04994	up
TraesCS1D01G439600	115	561	0.494506	2.54094	1.27e-08	2.23572	up
TraesCS1D01G439800	2	61	0.0175419	0.444443	8.62e-09	4.11275	up
TraesCS1D01G440100	0	453	0	5.32466	0	8.18087	up
TraesCS1D01G440200	0	72	0	1.36073	2.59e-12	5.5535	up
TraesCS1D01G440500	2	287	0.148812	19.3553	0	6.31819	up
TraesCS1D01G440900	4	356	0.049109	4.48123	0	5.97963	up
TraesCS1D01G441100	0	72	0	0.98712	2.59e-12	5.5535	up
TraesCS1D01G441400	12	516	0.213789	8.41232	0	5.22208	up
TraesCS1D01G441600	0	228	0	1.05542	0	7.19529	up
TraesCS1D01G441700	0	60	0	0.576122	1.3e-10	5.29659	up
TraesCS1D01G442100	25	160	0.992124	5.81556	4.11e-08	2.5709	up
TraesCS1D01G442900	0	895	0	97.4584	0	9.16079	up
TraesCS1D01G443000	132	45	6.69058	2.18803	0.00268191	-1.55541	down
TraesCS1D01G443100	10	690	0.125166	8.41337	0	5.871	up
TraesCS1D01G444100	10	121	0.518299	5.82932	1.77e-10	3.3747	up
TraesCS1D01G444400	0	36	0	0.595194	1.18e-06	4.58389	up
TraesCS1D01G444600	2	36	0.0143574	0.257769	5.72e-05	3.37681	up
TraesCS1D01G444900	0	1238	0	6.44123	0	9.62814	up
TraesCS1D01G445300	44	362	0.870283	12.2143	8.2e-13	2.96176	up
TraesCS1D01G445700	205	686	1.19095	4.25793	3.27e-05	1.69954	up
TraesCS1D01G445800	0	341	0	2.91029	0	7.77276	up
TraesCS1D01G446200	0	78	0	5.40155	4.14e-13	5.66661	up
TraesCS1D01G446400	0	1605	0	7.76626	0	10.0023	up
TraesCS1D01G446500	0	50	0	6.33623	4.58e-09	5.04088	up
TraesCS1D01G446900	8	914	0.0380364	3.67683	0	6.55069	up
TraesCS1D01G447000	0	768	0	20.1886	0	8.94042	up
TraesCS1D01G447100	0	248	0	14.9565	0	7.3158	up
TraesCS1D01G448300	21	209	1.24705	11.8938	3.44e-12	3.18885	up
TraesCS1D01G448600	0	2184	0	37.1705	0	10.4463	up
TraesCS1D01G448700	250	1112	0.773181	7.26273	3.39e-08	2.11077	up
TraesCS1D01G448900	0	50	0	0.641979	4.58e-09	5.04088	up
TraesCS1D01G449000	0	411	0	7.38965	0	8.041	up
TraesCS1D01G449200	6	1002	0.184516	28.6014	0	7.02299	up
TraesCS1D01G449900	0	1168	0	11.2583	0	9.54428	up
TraesCS1D01G450100	4	107	0.120251	2.76941	1.12e-12	4.25999	up
TraesCS1D01G450200	244	792	0.666446	2.32222	5.46e-05	1.65684	up
TraesCS1D01G450300	32	875	0.304098	8.46119	0	4.67279	up
TraesCS1D01G450400	134	1386	1.68526	18.0165	0	3.32027	up
TraesCS1D01G450600	0	1282	0	12.9404	0	9.67846	up
TraesCS1D01G450900	0	257	0	3.02121	0	7.36691	up
TraesCS1D01G451000	0	70	0	1.01364	4.85e-12	5.51373	up
TraesCS1D01G451100	34	229	0.572469	4.04898	1.21e-09	2.66252	up
TraesCS1D01G451200	132	2250	1.39278	20.8568	0	4.04009	up
TraesCS1D01G451300	143	945	1.99701	13.493	1.57e-12	2.67573	up
TraesCS1D01G451700	4	40	0.0767914	0.750173	0.000197703	2.87491	up
TraesCS1D01G451800	0	84	0	15.9723	7.15e-14	5.77149	up
TraesCS1D01G451900	102	2840	2.69132	66.7415	0	4.74297	up
TraesCS1D01G452200	21	3435	0.914503	82.5178	0	7.21747	up
TraesCS1D01G452300	2	555	0.276355	19.1992	0	7.26584	up
TraesCS1D01G452400	0	124	0	2.31815	0	6.32483	up
TraesCS1D01G452900	0	338	0	12.1307	0	7.76007	up
TraesCS1D01G453600	0	190	0	1.4214	0	6.93422	up
TraesCS1D01G453700	0	72	0	6.5608	2.59e-12	5.5535	up
TraesCS1D01G453800	0	41	0	0.250349	1.49e-07	4.76416	up
TraesCS1D01G454400	14	583	0.325411	14.2367	0	5.19878	up
TraesCS1D01G454600	2	1501	0.0456478	9.09102	0	8.69865	up
TraesCS1D01G454700	0	121	0	1.85382	0	6.28994	up
TraesCS2A01G000400	554	43	12.7885	0.714381	0	-3.67545	down
TraesCS2A01G003600	14	94	0.0488128	0.327694	1.69e-06	2.58599	up
TraesCS2A01G004600	235	92	14.3636	5.21152	0.00501635	-1.37357	down
TraesCS2A01G005100	1137	309	25.3057	6.78539	8.1e-07	-1.90982	down
TraesCS2A01G008900	0	64	0	1.07923	3.38e-11	5.38741	up
TraesCS2A01G012500	17	67	0.209925	0.900135	0.00310238	1.85215	up
TraesCS2A01G014200	156	31	2.88484	0.5698	6.24e-07	-2.30978	down
TraesCS2A01G016700	27	238	0.509398	4.59038	7.27e-12	3.03434	up
TraesCS2A01G019900	4	47	0.0536969	0.618443	1.86e-05	3.09945	up
TraesCS2A01G024700	10	307	0.0909196	2.8736	0	4.70672	up
TraesCS2A01G026000	156	48	2.0206	0.606076	0.000409534	-1.7038	down
TraesCS2A01G026600	657	202	30.5345	8.8139	1.95e-05	-1.72937	down
TraesCS2A01G026800	1725	509	72.2451	19.3965	4.87e-06	-1.79333	down
TraesCS2A01G027300	4	111	0.115147	2.24253	4.46e-13	4.31219	up
TraesCS2A01G027500	158	806	2.92802	15.2188	1.86e-09	2.30415	up
TraesCS2A01G027600	190	934	1.3017	7.15585	3.56e-09	2.25266	up
TraesCS2A01G027700	355	2874	5.97031	48.4381	4.44e-16	2.97613	up
TraesCS2A01G027800	169	1612	2.47637	24.1391	0	3.20655	up
TraesCS2A01G028000	2	162	0.047058	3.53857	0	5.49917	up
TraesCS2A01G028600	51	10	2.00298	0.394339	0.000958813	-2.21877	down
TraesCS2A01G029700	29	133	0.279413	1.28156	1.64e-05	2.10448	up
TraesCS2A01G031200	34	1	0.54681	0.0192127	1.31e-05	-3.82675	down
TraesCS2A01G032700	6	64	0.484901	4.50328	1.21e-06	3.08695	up
TraesCS2A01G033700	34	3	0.529433	0.0517916	0.00029216	-2.99545	down
TraesCS2A01G035400	59	5	2.86457	0.270163	7.01e-07	-3.24005	down
TraesCS2A01G035900	87	8	2.62693	0.233956	1.16e-08	-3.24571	down
TraesCS2A01G036100	269	103	8.3813	2.16229	0.00298129	-1.40698	down
TraesCS2A01G038000	59	14	2.58556	0.587934	0.00180002	-1.99479	down
TraesCS2A01G038300	83	20	1.87387	0.268185	0.000317223	-2.00627	down
TraesCS2A01G039400	47	11	1.15898	0.246587	0.00557614	-1.98487	down
TraesCS2A01G040000	0	55	1.15e-05	0.336257	7.44e-10	5.17439	up
TraesCS2A01G042500	102	560	0.638234	3.74889	8.23e-10	2.40381	up
TraesCS2A01G045000	169	27	2.5798	0.484619	1.18e-08	-2.61324	down
TraesCS2A01G045100	270	91	4.82893	1.53345	0.000396252	-1.58817	down
TraesCS2A01G045400	62	8	4.71524	0.613349	8.25e-06	-2.76697	down
TraesCS2A01G052500	2245	275	53.3579	6.62861	0	-3.05762	down
TraesCS2A01G053000	6	167	0.0610652	1.63674	1.11e-16	4.44924	up
TraesCS2A01G053100	55	245	0.531986	2.43532	1.36e-06	2.08931	up
TraesCS2A01G053300	310	3073	5.09587	49.5411	0	3.26732	up
TraesCS2A01G057000	8	384	0.136327	6.08013	0	5.303	up
TraesCS2A01G057100	94	672	0.533513	3.96777	6.44e-13	2.7822	up
TraesCS2A01G064900	6786	2552	895.371	323.297	0.00166411	-1.446	down
TraesCS2A01G066400	2	49	0.071826	1.59924	4.8e-07	3.80554	up
TraesCS2A01G066800	184	50	9.76634	2.6081	3.6e-05	-1.88276	down
TraesCS2A01G067300	425	0	14.0415	0	0	-8.12464	down
TraesCS2A01G067900	8	122	0.350093	0.932674	1.4e-11	3.66131	up
TraesCS2A01G068100	70	235	0.43172	1.61784	0.000186063	1.69004	up
TraesCS2A01G068300	2	182	0.0135311	1.07852	0	5.66559	up
TraesCS2A01G068500	0	201	0	2.69693	0	7.01477	up
TraesCS2A01G069700	6	311	0.223692	10.4325	0	5.34009	up
TraesCS2A01G076100	154	0	4.33317	0	0	-6.66918	down
TraesCS2A01G076500	49	0	1.15541	0	3.02e-09	-5.04716	down
TraesCS2A01G076600	1327	313	65.7156	14.5558	2.23e-08	-2.11402	down
TraesCS2A01G079300	190	894	1.3859	6.89729	1.13e-08	2.18962	up
TraesCS2A01G079500	113	529	0.858498	4.06556	3.74e-08	2.17621	up
TraesCS2A01G079600	40	4	0.576556	0.0640618	0.000109561	-2.93489	down
TraesCS2A01G081900	423	178	3.12756	1.33516	0.00823356	-1.27697	down
TraesCS2A01G086900	2671	1088	70.3026	27.4065	0.00496775	-1.33007	down
TraesCS2A01G087200	25	95	0.0923242	0.373249	0.000877839	1.82837	up
TraesCS2A01G088800	449	1201	7.83002	21.272	0.00212876	1.3808	up
TraesCS2A01G094700	74	11	2.04148	0.309497	5.53e-06	-2.62306	down
TraesCS2A01G097900	36	111	0.293725	0.954806	0.00507378	1.5491	up
TraesCS2A01G098600	464	173	2.9509	1.15342	0.00105682	-1.45072	down
TraesCS2A01G099200	36	7	0.205535	0.0415495	0.00793443	-2.16683	down
TraesCS2A01G102000	7436	2793	151.664	75.7866	0.00171134	-1.44782	down
TraesCS2A01G102300	1042	222	11.7919	2.26233	2.12e-09	-2.25832	down
TraesCS2A01G104800	6	57	0.129009	1.3608	9.03e-06	2.92407	up
TraesCS2A01G105000	0	36	0	0.264845	1.18e-06	4.58389	up
TraesCS2A01G107000	104	740	1.95206	10.4093	4.94e-13	2.77732	up
TraesCS2A01G107400	36	0	2.24041	0	6.26e-07	-4.61805	down
TraesCS2A01G107600	145	20	7.1762	0.921795	4.77e-09	-2.79994	down
TraesCS2A01G108600	12	234	0.61043	10.3423	0	4.08647	up
TraesCS2A01G110300	32	406	3.84145	44.7067	0	3.56796	up
TraesCS2A01G114300	0	116	6.36e-05	14.1384	0	6.22985	up
TraesCS2A01G114400	2157	6480	174.076	489.216	0.000375492	1.55067	up
TraesCS2A01G114600	8	77	5.61666	45.1746	3.58e-07	3.00801	up
TraesCS2A01G117900	126	35	3.34949	0.899539	0.000225546	-1.83785	down
TraesCS2A01G119600	1676	683	97.0348	31.5394	0.00423029	-1.3287	down
TraesCS2A01G121000	5054	2032	57.7906	23.9195	0.00533179	-1.34947	down
TraesCS2A01G123000	954	2907	43.5989	110.641	0.000191842	1.57031	up
TraesCS2A01G124700	21	72	0.468766	1.62236	0.00791195	1.67169	up
TraesCS2A01G125600	507	175	7.51113	3.39059	0.000243955	-1.56174	down
TraesCS2A01G126400	25	409	0.278738	4.74827	0	3.91639	up
TraesCS2A01G126500	21	135	0.309514	2.00014	1.45e-07	2.56417	up
TraesCS2A01G127500	49	2	0.736315	0.0370251	2.28e-07	-3.86016	down
TraesCS2A01G133600	139	50	0.761347	0.461022	0.00456662	-1.48198	down
TraesCS2A01G134000	291	60	1.79733	0.374114	3.95e-08	-2.28398	down
TraesCS2A01G135900	59	14	0.824302	0.200686	0.00180002	-1.99479	down
TraesCS2A01G136100	6	35	0.145611	0.731591	0.00779723	2.24451	up
TraesCS2A01G137500	188	43	1.12286	0.27545	2.06e-06	-2.12401	down
TraesCS2A01G137700	211	2616	2.74804	33.8323	0	3.58688	up
TraesCS2A01G140100	273	0	6.81423	0.00114046	0	-7.48895	down
TraesCS2A01G147200	36	112	0.843247	2.68799	0.0044589	1.56186	up
TraesCS2A01G150200	19	76	0.221303	0.788254	0.00147116	1.8822	up
TraesCS2A01G151400	68	396	0.458904	2.8436	8.43e-10	2.4799	up
TraesCS2A01G153600	524	161	7.87723	2.61013	2.49e-05	-1.72836	down
TraesCS2A01G154800	38	175	0.911133	4.17432	3.66e-06	2.12363	up
TraesCS2A01G159500	137	35	5.77559	1.39277	5.01e-05	-1.95721	down
TraesCS2A01G161700	179	55	8.41741	2.38063	0.00025926	-1.70983	down
TraesCS2A01G161900	0	211	0	2.49453	0	7.08429	up
TraesCS2A01G163300	404	170	11.6538	5.17723	0.00845683	-1.27666	down
TraesCS2A01G164000	393	1061	18.8159	52.8733	0.00178863	1.39373	up
TraesCS2A01G164300	94	264	3.00612	7.77017	0.00235868	1.43945	up
TraesCS2A01G165900	697	205	6.93915	1.88867	7.21e-06	-1.79334	down
TraesCS2A01G166600	1269	537	45.5264	20.287	0.00776397	-1.27386	down
TraesCS2A01G167300	6743	2180	366.725	110.87	6.09e-05	-1.66398	down
TraesCS2A01G174500	40	197	0.666531	3.51304	6.78e-07	2.22183	up
TraesCS2A01G176000	184	18	1.29142	0.129847	2.31e-12	-3.28081	down
TraesCS2A01G177200	1190	3828	39.4511	137.801	6.49e-05	1.64874	up
TraesCS2A01G177600	17	81	1.21126	3.81605	0.000183536	2.12021	up
TraesCS2A01G180500	14	78	0.402426	1.71479	4.94e-05	2.32164	up
TraesCS2A01G182200	94	8	0.544835	0.0527235	2.13e-09	-3.3555	down
TraesCS2A01G182400	162	40	1.79962	0.424993	1.4e-05	-2.01167	down
TraesCS2A01G183200	10	64	0.116136	0.735244	6.19e-05	2.47216	up
TraesCS2A01G183800	64	17	1.09491	0.463554	0.00312306	-1.85504	down
TraesCS2A01G183900	57	0	1.47953	0	1.53e-10	-5.2592	down
TraesCS2A01G184600	23	134	0.148352	0.881498	5.92e-07	2.43086	up
TraesCS2A01G186300	66	0	3.03155	0	6.66e-12	-5.46556	down
TraesCS2A01G187900	250	863	9.26733	22.7384	1.43e-05	1.74563	up
TraesCS2A01G189600	1270	526	23.6467	9.42118	0.00531922	-1.30476	down
TraesCS2A01G190200	2209	393	90.5618	17.0763	6.42e-12	-2.52167	down
TraesCS2A01G192700	79	229	1.33821	4.05265	0.00187621	1.48199	up
TraesCS2A01G194900	51	2	1.69782	0.0745181	1.11e-07	-3.91616	down
TraesCS2A01G196900	49	151	1.18934	3.31878	0.00208613	1.55865	up
TraesCS2A01G199300	244	72	7.61464	2.17571	5.49e-05	-1.77439	down
TraesCS2A01G199500	162	54	19.9183	6.66455	0.00111756	-1.59288	down
TraesCS2A01G200700	346	78	14.2023	3.028	1.18e-07	-2.16252	down
TraesCS2A01G205400	244	626	6.70734	16.2768	0.00474449	1.31826	up
TraesCS2A01G206000	387	1033	21.9483	52.4841	0.00220199	1.37731	up
TraesCS2A01G206100	1581	4070	66.287	166.82	0.00658408	1.32773	up
TraesCS2A01G206200	1393	537	90.1819	32.5234	0.00143392	-1.4082	down
TraesCS2A01G211900	1352	188	14.6104	2.3193	8.77e-15	-2.87157	down
TraesCS2A01G213800	14	88	6.27934	32.2996	5.87e-06	2.49244	up
TraesCS2A01G214000	36	121	0.593662	1.93698	0.00139078	1.67189	up
TraesCS2A01G214600	199	696	54.1985	167.114	1.3e-05	1.7629	up
TraesCS2A01G214800	2716	914	123.452	37.0228	0.000101758	-1.60518	down
TraesCS2A01G216600	111	40	1.42495	0.432364	0.00845037	-1.47242	down
TraesCS2A01G217000	21	489	0.219007	5.12448	0	4.40902	up
TraesCS2A01G217200	455	138	5.87938	1.76236	2.36e-05	-1.74538	down
TraesCS2A01G218700	729	40	68.5589	3.52679	0	-4.17107	down
TraesCS2A01G218900	358	23	2.54688	0.195844	0	-3.90697	down
TraesCS2A01G219100	0	443	0	9.48885	0	8.14878	up
TraesCS2A01G219200	2	69	0.0268462	1.15648	7.12e-10	4.28634	up
TraesCS2A01G219400	141	408	1.77764	4.83853	0.000826578	1.48723	up
TraesCS2A01G219600	0	56	0	1.83012	5.22e-10	5.19968	up
TraesCS2A01G220400	259	103	7.41702	2.92125	0.00550199	-1.35264	down
TraesCS2A01G223400	57	157	1.34894	4.63924	0.0079441	1.40226	up
TraesCS2A01G226500	2	72	0.0121745	0.429063	2.89e-10	4.34641	up
TraesCS2A01G233100	515	1474	10.6972	30.1067	0.000595736	1.47873	up
TraesCS2A01G235500	184	501	5.8572	25.4711	0.00194392	1.40205	up
TraesCS2A01G237100	256	2	8.40764	0.017207	0	-6.20973	down
TraesCS2A01G239100	39	4	1.70469	0.178438	0.000156733	-2.89973	down
TraesCS2A01G239900	160	476	2.46073	7.40184	0.000434702	1.52829	up
TraesCS2A01G240400	411	1122	20.8589	56.2243	0.00145553	1.4099	up
TraesCS2A01G243500	54	0	4.13158	5.36e-05	4.57e-10	-5.18329	down
TraesCS2A01G249300	81	11	2.96075	0.429201	1.02e-06	-2.75094	down
TraesCS2A01G250800	2153	6004	40.9338	101.948	0.0017081	1.4433	up
TraesCS2A01G251100	221	76	6.2635	1.97336	0.000821125	-1.55611	down
TraesCS2A01G253200	57	0	0.490151	0.00410538	1.53e-10	-5.2592	down
TraesCS2A01G254200	181	481	5.8581	15.0751	0.00299386	1.36698	up
TraesCS2A01G255100	8	115	0.107457	1.30419	5.92e-11	3.57718	up
TraesCS2A01G256100	541	1495	8.1768	21.4139	0.00118194	1.42826	up
TraesCS2A01G261700	104	402	2.69993	11.1482	4.09e-06	1.89955	up
TraesCS2A01G262400	77	0	6.91107	0	1.92e-13	-5.68328	down
TraesCS2A01G264600	336	1298	2.38373	9.48081	9.04e-07	1.90933	up
TraesCS2A01G269600	359	4	8.30657	0.106609	0	-6.05284	down
TraesCS2A01G274700	1526	411	35.0367	9.94159	5.67e-07	-1.92412	down
TraesCS2A01G275200	27	162	0.354869	2.06534	9.92e-08	2.48379	up
TraesCS2A01G280400	498	1409	9.42594	23.1969	0.000743783	1.46201	up
TraesCS2A01G286700	122	30	4.83474	1.22049	5.24e-05	-2.004	down
TraesCS2A01G288300	139	375	1.7914	5.21363	0.00285298	1.38642	up
TraesCS2A01G289600	23	85	0.406295	1.23829	0.00192872	1.78374	up
TraesCS2A01G291000	36	164	0.363548	1.81163	5.99e-06	2.10574	up
TraesCS2A01G291900	34	5	1.19456	0.192366	0.00272527	-2.47141	down
TraesCS2A01G292800	466	145	3.64684	1.14735	3.75e-05	-1.70912	down
TraesCS2A01G294400	57	16	2.13453	0.579771	0.00851902	-1.77194	down
TraesCS2A01G296400	1220	516	271.994	103.418	0.00763694	-1.2745	down
TraesCS2A01G299900	3	77	0.186388	4.15795	4.28e-10	4.08127	up
TraesCS2A01G302900	51	592	2.5868	26.5293	0	3.46262	up
TraesCS2A01G304000	139	28	4.71736	0.911284	1.58e-06	-2.28445	down
TraesCS2A01G305600	130	346	3.90771	9.98723	0.00381552	1.36629	up
TraesCS2A01G305900	72	333	1.86968	7.97341	2.05e-07	2.1503	up
TraesCS2A01G306000	8	41	0.23322	1.09091	0.00620013	2.12381	up
TraesCS2A01G307500	70	374	1.91791	9.87665	6.83e-09	2.35686	up
TraesCS2A01G309700	171	65	3.88124	1.41993	0.00580211	-1.40959	down
TraesCS2A01G316500	156	42	5.71882	1.45978	6e-05	-1.88995	down
TraesCS2A01G318200	85	21	4.05537	0.940957	0.000364165	-1.97462	down
TraesCS2A01G318500	250	2	13.9695	0.166733	0	-6.17572	down
TraesCS2A01G318600	102	513	3.98855	20.5579	8.17e-09	2.27771	up
TraesCS2A01G319200	211	52	5.2496	1.27737	4.25e-06	-2.02388	down
TraesCS2A01G325100	316	56	9.70015	1.63199	1.23e-09	-2.49921	down
TraesCS2A01G333000	36	353	2.82323	19.4569	2.49e-14	3.20438	up
TraesCS2A01G338600	1712	376	49.3249	10.5597	2.88e-09	-2.21779	down
TraesCS2A01G338800	353	10	11.5084	0.384821	0	-4.97351	down
TraesCS2A01G339100	42	3	1.69805	0.13644	1.43e-05	-3.28844	down
TraesCS2A01G339600	0	453	1.44e-05	9.74143	0	8.18087	up
TraesCS2A01G340900	2	47	0.0736667	1.55283	9.71e-07	3.74732	up
TraesCS2A01G342600	72	9	3.74668	0.527834	1.49e-06	-2.83443	down
TraesCS2A01G342700	57	14	1.38147	0.349918	0.00288178	-1.94632	down
TraesCS2A01G345100	41	0	0.492508	0	7.45e-08	-4.79849	down
TraesCS2A01G345500	12	57	0.350517	1.49968	0.00153008	2.07848	up
TraesCS2A01G345700	21	145	0.269403	9.01478	3e-08	2.66613	up
TraesCS2A01G347800	44	10	0.35314	0.103969	0.0065151	-2.01244	down
TraesCS2A01G348600	64	5	2.04485	0.179792	1.54e-07	-3.35456	down
TraesCS2A01G348800	978	380	33.3908	12.2821	0.00163832	-1.39578	down
TraesCS2A01G349100	87	9	8.4896	0.839489	3.48e-08	-3.10227	down
TraesCS2A01G349800	409	1117	7.25107	21.0957	0.0014444	1.41047	up
TraesCS2A01G350700	1434	7858	58.8832	325.857	7.17e-11	2.41724	up
TraesCS2A01G352900	64	11	11.3661	1.94028	6.71e-05	-2.41817	down
TraesCS2A01G357400	526	94	7.87035	1.4432	1.42e-10	-2.5003	down
TraesCS2A01G360600	131	336	0.937637	3.9033	0.00687974	1.31325	up
TraesCS2A01G363800	53	7	1.5985	0.255487	4.14e-05	-2.70586	down
TraesCS2A01G365800	406	85	11.8793	2.14228	1.39e-08	-2.27064	down
TraesCS2A01G367300	4	37	0.0417867	0.389612	0.000560248	2.76683	up
TraesCS2A01G367700	87	570	3.90381	26.429	1.13e-11	2.65509	up
TraesCS2A01G368700	800	203	11.0082	2.82038	2.25e-07	-2.00581	down
TraesCS2A01G370500	92	20	1.77675	0.377222	5.64e-05	-2.15224	down
TraesCS2A01G371800	287	711	3.04375	8.93252	0.00821069	1.26869	up
TraesCS2A01G372000	175	743	13.6445	66.3887	1.72e-07	2.04088	up
TraesCS2A01G372500	336	90	21.6328	5.90457	3.96e-06	-1.91774	down
TraesCS2A01G373200	36	127	0.647471	2.24114	0.000640254	1.74084	up
TraesCS2A01G373600	96	21	0.803526	0.201998	4.67e-05	-2.14727	down
TraesCS2A01G373900	98	4	1.67407	0.0760208	3.03e-12	-4.19591	down
TraesCS2A01G375000	1823	614	28.6656	9.83473	9.51e-05	-1.60316	down
TraesCS2A01G375100	38	7	2.65309	0.484004	0.00422387	-2.24174	down
TraesCS2A01G376300	316	9	8.99868	0.274901	0	-4.94495	down
TraesCS2A01G377200	329	1714	7.06721	35.1366	3.76e-10	2.34022	up
TraesCS2A01G378000	569	83	8.85303	1.42534	6.95e-13	-2.78977	down
TraesCS2A01G381600	162	8	11.6535	0.55083	1.78e-15	-4.13104	down
TraesCS2A01G381900	336	136	18.4796	7.21395	0.00537155	-1.3305	down
TraesCS2A01G382700	303	22	5.13751	0.49921	0	-3.72739	down
TraesCS2A01G383100	44	143	4.04847	12.0685	0.00122326	1.63128	up
TraesCS2A01G383900	4	41	9.49596	71.3965	0.000140242	2.9092	up
TraesCS2A01G384200	74	5	2.72145	0.200218	8.4e-09	-3.55946	down
TraesCS2A01G387500	42	9	0.266288	0.062238	0.00575965	-2.07809	down
TraesCS2A01G388500	49	3	2.22	0.134824	1.17e-06	-3.50357	down
TraesCS2A01G389200	1592	353	18.5363	3.88487	3.9e-09	-2.20372	down
TraesCS2A01G391100	203	574	2.16408	6.25475	0.00092589	1.45706	up
TraesCS2A01G393700	96	373	6.54935	25.1907	4.41e-06	1.90571	up
TraesCS2A01G393800	87	28	11.4275	3.45625	0.00539813	-1.6178	down
TraesCS2A01G394900	2	42	0.105461	2.60679	5.94e-06	3.59058	up
TraesCS2A01G395000	1821	10797	60.8313	331.492	7.41e-12	2.5312	up
TraesCS2A01G395400	95	5	2.22548	0.11139	3.14e-11	-3.91339	down
TraesCS2A01G395800	89	21	2.63639	0.582039	0.000171659	-2.03981	down
TraesCS2A01G397700	318	97	24.5282	7.54778	5.1e-05	-1.7324	down
TraesCS2A01G399300	2	117	0.932847	44.3305	2.44e-15	5.03499	up
TraesCS2A01G400100	430	158	15.2273	4.87705	0.000878193	-1.47092	down
TraesCS2A01G401000	6	170	0.3243	8.29492	1.11e-16	4.47469	up
TraesCS2A01G404700	620	244	2.66275	1.33535	0.00227725	-1.37533	down
TraesCS2A01G406000	49	9	1.55297	0.285617	0.000780304	-2.29323	down
TraesCS2A01G406800	235	610	9.57062	22.8249	0.00393753	1.33487	up
TraesCS2A01G408700	83	9	2.17131	0.232733	9.23e-08	-3.03557	down
TraesCS2A01G408900	77	7	1.09829	0.0966334	4.74e-08	-3.23207	down
TraesCS2A01G409000	166	55	114.071	32.6359	0.000960538	-1.60201	down
TraesCS2A01G409400	331	920	3.38298	9.67129	0.0010579	1.43499	up
TraesCS2A01G410100	155	0	4.97005	4.57e-06	0	-6.67842	down
TraesCS2A01G411200	455	167	7.79196	3.13425	0.000817254	-1.47301	down
TraesCS2A01G415100	145	41	15.2049	3.93619	0.000162435	-1.81901	down
TraesCS2A01G415300	134	37	7.48151	1.8635	0.000160935	-1.8488	down
TraesCS2A01G419900	51	150	0.379609	1.13526	0.00386638	1.49316	up
TraesCS2A01G421500	40	882	1.60554	33.4737	0	4.37555	up
TraesCS2A01G422100	47	1698	1.52853	52.5719	0	5.09457	up
TraesCS2A01G423400	629	220	7.49115	2.69041	0.000262667	-1.54445	down
TraesCS2A01G424800	404	3149	88.0671	598.99	1.55e-15	2.92211	up
TraesCS2A01G425800	423	2857	5.57331	42.2454	1.41e-13	2.71574	up
TraesCS2A01G426000	85	9	2.44308	0.259553	5.65e-08	-3.06931	down
TraesCS2A01G426900	209	541	4.84111	13.2176	0.00432811	1.33016	up
TraesCS2A01G435000	143	8	15.8379	0.860289	6.08e-14	-3.95285	down
TraesCS2A01G438200	331	127	12.492	4.85223	0.00236907	-1.40659	down
TraesCS2A01G439100	57	9	0.882282	0.142244	8.29e-05	-2.50527	down
TraesCS2A01G442200	38	2	1.46094	0.0924599	1.45e-05	-3.50595	down
TraesCS2A01G443000	100	655	0.742815	6.13778	6.52e-12	2.65744	up
TraesCS2A01G443200	0	34	0.00020065	4.77331	2.76e-06	4.50496	up
TraesCS2A01G443400	6	37	0.0243988	0.144985	0.00412848	2.32134	up
TraesCS2A01G444000	1057	176	32.7058	5.3381	2.77e-12	-2.61125	down
TraesCS2A01G445100	27	90	0.822575	2.73137	0.00443729	1.6468	up
TraesCS2A01G445900	0	38	0	1.59038	5.08e-07	4.65873	up
TraesCS2A01G446700	27	108	3.72699	13.5756	0.000270152	1.90572	up
TraesCS2A01G447000	7	237	0.0230289	0.778843	0	4.77038	up
TraesCS2A01G447800	811	294	18.9785	6.82934	0.000459399	-1.49456	down
TraesCS2A01G448300	1808	714	85.737	29.8257	0.00240173	-1.37408	down
TraesCS2A01G452300	79	288	2.75805	10.0283	2.76e-05	1.8107	up
TraesCS2A01G452500	194	603	7.58817	22.871	0.000156289	1.5929	up
TraesCS2A01G453300	1911	270	60.2318	7.93671	7.22e-15	-2.85173	down
TraesCS2A01G453700	284	76	14.1429	3.66893	6.3e-06	-1.91575	down
TraesCS2A01G454000	336	117	57.9718	18.1417	0.000470375	-1.54494	down
TraesCS2A01G454300	21	97	22.2398	81.9435	8.84e-05	2.09374	up
TraesCS2A01G454700	301	81	17.1021	4.45003	5.88e-06	-1.90907	down
TraesCS2A01G455400	171	455	8.82369	21.9455	0.00304271	1.36837	up
TraesCS2A01G457700	190	64	7.2763	2.26919	0.000854544	-1.58215	down
TraesCS2A01G458300	297	83	14.6105	4.04529	1.23e-05	-1.85533	down
TraesCS2A01G458400	235	85	3.60371	1.44896	0.0015648	-1.48576	down
TraesCS2A01G460200	74	5	2.52101	0.18352	8.4e-09	-3.55946	down
TraesCS2A01G461300	15729	5902	363.422	142.997	0.00267697	-1.44953	down
TraesCS2A01G461800	1519	389	17.0416	4.14366	1.64e-07	-1.99656	down
TraesCS2A01G461900	284	75	9.01021	2.2316	4.94e-06	-1.93447	down
TraesCS2A01G462300	1483	502	45.418	14.9135	0.000104482	-1.59537	down
TraesCS2A01G462400	59	8	4.07189	0.501735	1.91e-05	-2.69718	down
TraesCS2A01G462500	188	27	8.71494	1.50628	8.79e-10	-2.76564	down
TraesCS2A01G466100	0	52	0	0.226352	2.19e-09	5.09578	up
TraesCS2A01G466700	96	14	2.44551	0.356362	4.41e-07	-2.68301	down
TraesCS2A01G466900	57	280	0.471616	3.15058	1.28e-07	2.23065	up
TraesCS2A01G467100	126	1	20.5263	0.279076	0	-5.67053	down
TraesCS2A01G467700	62	17	1.66984	0.487063	0.00478534	-1.81033	down
TraesCS2A01G467900	1716	619	39.7489	13.6655	0.000397703	-1.5043	down
TraesCS2A01G468500	2322	550	51.4669	12.464	1.93e-08	-2.11033	down
TraesCS2A01G469900	4234	237	38.9117	2.20055	0	-4.1857	down
TraesCS2A01G473800	27	256	0.0723888	0.723532	9.77e-13	3.13886	up
TraesCS2A01G474000	563	1733	8.52248	22.0585	0.000137483	1.58383	up
TraesCS2A01G475700	205	31	5.3535	0.508925	1.04e-09	-2.70051	down
TraesCS2A01G478700	171	53	5.891	1.79802	0.000339295	-1.69637	down
TraesCS2A01G483300	4	197	0.0194408	0.962171	0	5.13104	up
TraesCS2A01G484500	4	237	0.536494	27.5705	0	5.39581	up
TraesCS2A01G484600	4	736	0.323999	53.5807	0	7.02419	up
TraesCS2A01G484800	357	1025	2.56283	7.87184	0.000563449	1.48204	up
TraesCS2A01G485100	0	125	0	1.0199	0	6.33627	up
TraesCS2A01G485500	488	155	13.0302	4.27706	5.25e-05	-1.68024	down
TraesCS2A01G486600	19	367	0.228468	4.19343	0	4.13062	up
TraesCS2A01G487600	64	3	0.996325	0.0570022	8.02e-09	-3.8786	down
TraesCS2A01G488800	47	145	3.2592	9.35237	0.00229957	1.55903	up
TraesCS2A01G489500	158	975	6.77886	38.6546	9.08e-12	2.57828	up
TraesCS2A01G490000	107	3308	2.42421	78.3672	0	4.89488	up
TraesCS2A01G490100	12	125	0.311853	2.94769	6.47e-10	3.19023	up
TraesCS2A01G490500	284	1480	6.92165	34.5926	4.27e-10	2.33979	up
TraesCS2A01G490800	8	137	0.114691	2.93576	7.32e-13	3.8266	up
TraesCS2A01G492500	59	12	1.08822	0.541568	0.000496392	-2.19319	down
TraesCS2A01G495600	126	42	0.772256	0.328882	0.00232786	-1.58515	down
TraesCS2A01G496200	468	173	21.7844	7.67994	0.000903414	-1.46306	down
TraesCS2A01G499000	36	130	4.0467	13.6121	0.000434887	1.77412	up
TraesCS2A01G501900	259	1308	4.71796	23.9655	1.12e-09	2.29395	up
TraesCS2A01G503700	209	60	4.77828	1.36801	5.54e-05	-1.80942	down
TraesCS2A01G504800	100	23	54.1673	10.9146	6.62e-05	-2.08274	down
TraesCS2A01G508800	149	31	1.29838	0.297366	1.65e-06	-2.2442	down
TraesCS2A01G509600	199	661	5.63115	18.2403	3.93e-05	1.68864	up
TraesCS2A01G509900	32	101	0.462187	1.52989	0.00528969	1.57749	up
TraesCS2A01G510300	310	926	5.96304	14.8479	0.000266992	1.53846	up
TraesCS2A01G510800	1485	526	68.6004	21.4532	0.000269214	-1.53015	down
TraesCS2A01G511200	203	60	4.47236	1.15235	9.68e-05	-1.76771	down
TraesCS2A01G512400	676	148	41.7702	8.60794	9.03e-09	-2.21512	down
TraesCS2A01G512500	87	2	1.74384	0.044502	1.36e-12	-4.66921	down
TraesCS2A01G513400	321	4	634.611	7.43011	0	-5.89215	down
TraesCS2A01G513900	47	7	3.37118	0.421028	0.000255266	-2.53768	down
TraesCS2A01G514100	299	121	1.56926	0.671114	0.00601134	-1.32956	down
TraesCS2A01G514300	1305	320	105.823	24.7366	6.04e-08	-2.05817	down
TraesCS2A01G514800	252	36	3.76324	0.516855	7.36e-11	-2.79025	down
TraesCS2A01G515100	156	8	1.17232	0.0549493	5.44e-15	-4.07711	down
TraesCS2A01G516700	62	10	0.79584	0.138585	5.02e-05	-2.49308	down
TraesCS2A01G516800	47	4	1.19455	0.115059	9.48e-06	-3.15962	down
TraesCS2A01G518400	134	354	2.31284	5.77876	0.00418728	1.3559	up
TraesCS2A01G520400	47	217	3.91455	16.2682	1.24e-06	2.13555	up
TraesCS2A01G521400	156	10	1.08109	0.0757928	6.92e-14	-3.80322	down
TraesCS2A01G522100	36	0	18.8856	0	6.26e-07	-4.61805	down
TraesCS2A01G527100	10	85	0.435021	3.42141	3.9e-07	2.87301	up
TraesCS2A01G527500	0	89	0	0.813945	1.74e-14	5.85342	up
TraesCS2A01G528900	44	220	4.9405	23.36	2.96e-07	2.24728	up
TraesCS2A01G532600	449	3	3.16629	0.0551398	0	-6.66003	down
TraesCS2A01G533400	0	36	0	0.455317	1.18e-06	4.58389	up
TraesCS2A01G534300	1725	413	99.8799	23.6138	2.8e-08	-2.09382	down
TraesCS2A01G534600	96	10	2.69169	0.280623	1.19e-08	-3.1115	down
TraesCS2A01G537600	8	97	0.198768	0.809113	3.01e-09	3.33519	up
TraesCS2A01G539300	59	177	3.55636	10.0857	0.00198921	1.52516	up
TraesCS2A01G541800	10	67	1.26217	7.32097	2.92e-05	2.53671	up
TraesCS2A01G541900	2	44	0.268168	5.18463	2.85e-06	3.65533	up
TraesCS2A01G542100	6	36	0.872217	4.54951	0.00567307	2.28344	up
TraesCS2A01G546200	117	0	4.20003	0	0	-6.27723	down
TraesCS2A01G546300	160	3	5.40238	0.113824	0	-5.1802	down
TraesCS2A01G546400	175	3	5.55275	0.110168	0	-5.30831	down
TraesCS2A01G546500	248	71	6.13049	2.46287	3.13e-05	-1.81745	down
TraesCS2A01G546600	62	4	1.28236	0.0967359	7.09e-08	-3.5482	down
TraesCS2A01G547300	4	391	0.221936	19.1547	0	6.11435	up
TraesCS2A01G552700	0	49	0	0.792017	6.66e-09	5.01263	up
TraesCS2A01G552800	0	564	0	4.57723	0	8.49607	up
TraesCS2A01G553100	0	46	0	0.726054	2.08e-08	4.92439	up
TraesCS2A01G553400	19	121	0.256079	1.74849	3.94e-07	2.54226	up
TraesCS2A01G554900	122	17	6.52765	0.841255	2.76e-08	-2.7697	down
TraesCS2A01G555000	0	45	0	2.21261	3.06e-08	4.89374	up
TraesCS2A01G555100	2	156	0.0385916	3.2663	0	5.44525	up
TraesCS2A01G556100	115	634	4.39376	21.3268	5.06e-10	2.41174	up
TraesCS2A01G557900	931	276	11.0859	3.1339	6.72e-06	-1.78394	down
TraesCS2A01G559600	857	306	41.2473	12.9761	0.000336528	-1.51659	down
TraesCS2A01G559800	1408	508	24.6543	9.035	0.000390427	-1.50349	down
TraesCS2A01G562400	736	207	20.2096	5.36595	2.57e-06	-1.85782	down
TraesCS2A01G564200	0	759	0	2.24236	0	8.92345	up
TraesCS2A01G565400	14	124	0.264445	2.10206	4.96e-09	2.97986	up
TraesCS2A01G566000	59	11	1.14797	0.222577	0.000241689	-2.30366	down
TraesCS2A01G571000	10	50	0.0915199	0.42645	0.0022612	2.12564	up
TraesCS2A01G571700	104	436	5.67694	21.4984	6.56e-07	2.01625	up
TraesCS2A01G571800	72	17	1.61402	0.400395	0.000568416	-2.02123	down
TraesCS2A01G573400	77	228	2.78231	7.70486	0.00138177	1.512	up
TraesCS2A01G573900	171	827	10.3667	44.6278	6.56e-09	2.22816	up
TraesCS2A01G576600	252	96	5.9195	3.09129	0.00303528	-1.41331	down
TraesCS2A01G577000	355	141	3.69183	1.45302	0.00380826	-1.35801	down
TraesCS2A01G577600	10	77	0.28527	2.11879	2.55e-06	2.73312	up
TraesCS2A01G582100	212	558	6.64209	20.1651	0.00323633	1.35426	up
TraesCS2A01G583100	44	127	2.00307	5.10724	0.00740445	1.46206	up
TraesCS2A01G583500	229	81	12.4724	4.07736	0.00117157	-1.51694	down
TraesCS2A01G584700	209	0	11.4152	0	0	-7.10601	down
TraesCS2A01G586000	0	83	0	0.98571	9.53e-14	5.75453	up
TraesCS2A01G586400	23	84	0.961246	3.06213	0.0022902	1.76698	up
TraesCS2A01G588300	1029	78	18.6696	1.40121	0	-3.7307	down
TraesCS2A01G589900	355	129	5.0787	1.49905	0.000897007	-1.48486	down
TraesCS2A01G590300	17	143	0.847431	3.23551	2.22e-09	2.92831	up
TraesCS2A01G590800	164	8	8.94417	0.414527	1.33e-15	-4.14858	down
TraesCS2A01G591200	57	9	5.07304	0.789447	8.29e-05	-2.50527	down
TraesCS2A01G591500	44	3	0.44743	0.0358551	6.91e-06	-3.35325	down
TraesCS2A01G591700	19	92	2.74262	12.4957	7.14e-05	2.15276	up
TraesCS2A01G592500	6	97	0.0483921	0.827798	2.44e-10	3.67509	up
TraesCS2A01G592600	62	209	0.320487	1.21035	0.000238168	1.69318	up
TraesCS2A01G593300	47	264	3.29033	17.8771	1.37e-08	2.41655	up
TraesCS2A01G593700	83	247	1.19387	3.34085	0.00109844	1.5205	up
TraesCS2B01G001600	12	88	0.0875309	0.621937	1.2e-06	2.69136	up
TraesCS2B01G005100	203	67	2.77824	0.974474	0.000535482	-1.61235	down
TraesCS2B01G008700	530	0	3.88199	0	0	-8.44215	down
TraesCS2B01G023500	203	71	13.1374	4.34153	0.0012715	-1.53055	down
TraesCS2B01G026100	0	40	3.11e-05	1.27563	2.23e-07	4.72987	up
TraesCS2B01G027000	0	2944	0	28.6948	0	10.8768	up
TraesCS2B01G031100	57	1	0.89713	0.0186633	1.83e-09	-4.54692	down
TraesCS2B01G031200	47	1	0.792644	0.0204102	7.04e-08	-4.27661	down
TraesCS2B01G035200	479	90	11.632	2.14197	6.62e-10	-2.42735	down
TraesCS2B01G036100	134	36	397.06	81.8263	0.000110836	-1.8867	down
TraesCS2B01G039900	366	103	11.9151	3.27014	8.32e-06	-1.84906	down
TraesCS2B01G040000	1111	348	51.6947	15.1344	2.06e-05	-1.70583	down
TraesCS2B01G040100	515	16	22.1012	1.15681	0	-4.91358	down
TraesCS2B01G040200	6364	690	295.066	31.219	0	-3.23796	down
TraesCS2B01G040300	406	121	4.70177	1.48569	2.04e-05	-1.76896	down
TraesCS2B01G040500	336	4758	9.31741	127.705	0	3.78213	up
TraesCS2B01G040600	1239	12849	26.9038	272.537	0	3.33718	up
TraesCS2B01G041800	55	153	1.40202	3.74574	0.00742245	1.41556	up
TraesCS2B01G041900	6	87	0.0706223	0.943775	2.75e-09	3.52075	up
TraesCS2B01G042400	143	11	3.47599	0.292766	2.3e-12	-3.55933	down
TraesCS2B01G042700	47	7	0.74884	0.156371	0.000255266	-2.53768	down
TraesCS2B01G043600	0	38	1.33e-05	0.2492	5.08e-07	4.65873	up
TraesCS2B01G043700	55	298	0.502298	2.21405	1.45e-08	2.37021	up
TraesCS2B01G043900	49	270	0.644583	3.50329	1.74e-08	2.39052	up
TraesCS2B01G044400	207	43	2.38489	0.523196	2.48e-07	-2.26184	down
TraesCS2B01G044900	29	177	0.195786	1.19857	4.05e-08	2.51262	up
TraesCS2B01G045000	32	111	0.423335	1.45567	0.00130541	1.7117	up
TraesCS2B01G045400	220	554	1.47868	3.83593	0.00670374	1.29084	up
TraesCS2B01G045600	168	42	1.2644	0.322107	1.43e-05	-1.99586	down
TraesCS2B01G045700	0	72	5.32e-05	0.470366	2.59e-12	5.5535	up
TraesCS2B01G046000	36	0	0.767538	0	6.26e-07	-4.61805	down
TraesCS2B01G046400	83	227	0.821616	2.40515	0.00440454	1.39948	up
TraesCS2B01G046500	1066	63	7.54704	1.56841	0	-4.08297	down
TraesCS2B01G046700	57	8	4.606	0.59369	3.38e-05	-2.6487	down
TraesCS2B01G047300	116	518	3.90199	18.557	1.12e-07	2.10868	up
TraesCS2B01G049000	291	115	9.47294	2.64623	0.00434227	-1.36305	down
TraesCS2B01G051500	0	256	0	1.43908	0	7.36132	up
TraesCS2B01G052700	0	45	1.95e-05	1.07302	3.06e-08	4.89374	up
TraesCS2B01G053700	387	1405	4.78113	17.2533	3.71e-06	1.82046	up
TraesCS2B01G057200	55	12	1.18482	0.276018	0.0013572	-2.09455	down
TraesCS2B01G058000	588	75	11.1215	1.39727	1.97e-14	-2.9804	down
TraesCS2B01G058300	66	304	6.1392	8.62547	3.11e-07	2.1423	up
TraesCS2B01G058600	0	37	0	0.706518	7.71e-07	4.62179	up
TraesCS2B01G062500	246	604	20.7742	47.4513	0.00977781	1.25507	up
TraesCS2B01G063100	44	2	1.2354	0.0660949	1.44e-06	-3.70983	down
TraesCS2B01G063900	389	1146	4.32527	13.419	0.000336394	1.51946	up
TraesCS2B01G064900	154	55	1.36841	0.372179	0.00322884	-1.49478	down
TraesCS2B01G065200	0	37	0	0.744437	7.71e-07	4.62179	up
TraesCS2B01G067600	203	17	4.82022	0.183833	6.15e-14	-3.49716	down
TraesCS2B01G072300	6	60	0.0483702	0.485749	3.79e-06	2.99614	up
TraesCS2B01G077200	248	61	7.76427	1.8988	2.16e-06	-2.03137	down
TraesCS2B01G078700	29	108	1.16129	3.99344	0.000631084	1.80797	up
TraesCS2B01G079100	77	10	7.30544	0.952164	1.09e-06	-2.79889	down
TraesCS2B01G079300	303	14	15.5768	0.774262	0	-4.32569	down
TraesCS2B01G079400	179	51	22.091	5.95393	8.29e-05	-1.81563	down
TraesCS2B01G079500	109	22	11.4355	2.20117	7.87e-06	-2.26523	down
TraesCS2B01G079900	17	715	1.51502	59.955	0	5.23768	up
TraesCS2B01G080200	49	346	0.254021	2.09267	2.85e-11	2.7465	up
TraesCS2B01G080700	38	183	0.242222	1.24881	1.44e-06	2.18756	up
TraesCS2B01G081900	2	84	0.0159786	3.69547	9.35e-12	4.56441	up
TraesCS2B01G082200	0	88	0	0.758955	2.3e-14	5.83741	up
TraesCS2B01G082700	157	0	0.916782	2.69e-95	0	-6.69674	down
TraesCS2B01G083800	12	416	0.448146	14.5294	0	4.91234	up
TraesCS2B01G083900	94	726	1.98524	9.55101	6.31e-14	2.89346	up
TraesCS2B01G084000	0	48	0	0.334032	9.7e-09	4.98381	up
TraesCS2B01G084200	17	670	0.21878	7.66677	0	5.14411	up
TraesCS2B01G084800	38	8	1.38659	0.278446	0.00909715	-2.08245	down
TraesCS2B01G084900	191	873	1.88183	5.68391	2.37e-08	2.14787	up
TraesCS2B01G085000	137	0	0.669672	0	0	-6.50218	down
TraesCS2B01G088600	0	255	0	5.91278	0	7.35571	up
TraesCS2B01G090600	51	2	0.685804	0.0268189	1.11e-07	-3.91616	down
TraesCS2B01G091300	1933	442	34.294	7.35825	7.97e-09	-2.16038	down
TraesCS2B01G091500	239	67	5.29985	1.47638	2.44e-05	-1.84626	down
TraesCS2B01G093100	2	198	0.0540457	4.8524	0	5.78616	up
TraesCS2B01G096700	117	34	5.64758	1.56548	0.000545298	-1.77227	down
TraesCS2B01G097800	151	1692	2.00275	23.6801	0	3.43729	up
TraesCS2B01G097900	8	58	0.155466	1.12314	5.18e-05	2.6086	up
TraesCS2B01G100200	0	915	0	11.5011	0	9.19262	up
TraesCS2B01G101800	207	614	10.3174	28.9702	0.000371692	1.52605	up
TraesCS2B01G103000	961	382	14.5713	5.67081	0.00248834	-1.36298	down
TraesCS2B01G110300	231	84	4.95984	1.70372	0.00174931	-1.47791	down
TraesCS2B01G111000	286	102	1.79434	0.664866	0.000896648	-1.50877	down
TraesCS2B01G113700	6	43	0.280822	1.87971	0.000622917	2.52995	up
TraesCS2B01G116600	4	35	0.0585624	0.475029	0.00113209	2.69001	up
TraesCS2B01G117700	807	333	2.77096	1.21674	0.00486792	-1.30863	down
TraesCS2B01G119000	1138	344	52.0615	14.5988	9.33e-06	-1.75703	down
TraesCS2B01G121900	55	355	1.54422	11.0849	1.63e-10	2.6215	up
TraesCS2B01G122500	631	121	4.31947	0.90594	4.28e-10	-2.40319	down
TraesCS2B01G122700	62	9	1.40781	0.291734	2.11e-05	-2.62353	down
TraesCS2B01G123100	119	0	7.9088	0	0	-6.30137	down
TraesCS2B01G123700	2074	552	33.2557	8.45432	3.95e-07	-1.94227	down
TraesCS2B01G124100	483	0	18.4383	0	0	-8.30858	down
TraesCS2B01G124200	36	0	0.427907	0	6.26e-07	-4.61805	down
TraesCS2B01G124300	1036	0	32.7833	0	0	-9.40708	down
TraesCS2B01G124800	725	2745	35.2524	125.381	1.31e-06	1.88291	up
TraesCS2B01G125200	284	707	8.41044	23.5872	0.00758885	1.27565	up
TraesCS2B01G125400	40	0	0.707425	0	1.13e-07	-4.76416	down
TraesCS2B01G126500	372	0	29.1839	0	0	-7.93322	down
TraesCS2B01G127500	310	1	6.53436	0.0637607	0	-6.95908	down
TraesCS2B01G129300	115	14	30.4455	3.3554	9.14e-09	-2.93979	down
TraesCS2B01G129600	6038	434	148.075	11.9977	0	-3.8291	down
TraesCS2B01G129700	415	31	1.36848	0.133631	0	-3.71258	down
TraesCS2B01G130300	6141	2163	1139.29	363.339	0.000394285	-1.54038	down
TraesCS2B01G130700	151	28	1.85301	1.01947	2.71e-07	-2.40267	down
TraesCS2B01G131200	316	63	34.3917	6.72401	1.38e-08	-2.33365	down
TraesCS2B01G131900	137	11	5.86615	0.490766	7.03e-12	-3.49816	down
TraesCS2B01G132900	8725	1246	66.942	11.5097	4.66e-15	-2.84192	down
TraesCS2B01G133200	2142	169	114.345	8.58696	0	-3.68721	down
TraesCS2B01G133500	4411	11	340.991	0.860053	0	-8.49151	down
TraesCS2B01G135100	107	3	1.60489	0.0497668	5.46e-14	-4.60648	down
TraesCS2B01G135800	1400	278	5.45081	1.22596	2.23e-10	-2.36136	down
TraesCS2B01G135900	1811	630	18.8487	8.77879	0.000189083	-1.55662	down
TraesCS2B01G136000	64	0	9.81541	0	1.31e-11	-5.42219	down
TraesCS2B01G137300	1252	315	15.6542	5.05779	1.18e-07	-2.02104	down
TraesCS2B01G137400	111	37	0.449743	0.156338	0.00346441	-1.58049	down
TraesCS2B01G137500	40	1	0.848249	0.0263187	1.09e-06	-4.05188	down
TraesCS2B01G137700	761	0	24.8015	2.91e-05	0	-8.96279	down
TraesCS2B01G138200	154	0	1.22745	0	0	-6.66918	down
TraesCS2B01G138400	94	0	1.28427	0	1.33e-15	-5.966	down
TraesCS2B01G139000	396	165	6.54067	2.72343	0.00736217	-1.29058	down
TraesCS2B01G139200	2378	44	34.7978	0.633373	0	-5.74218	down
TraesCS2B01G140300	944	5	29.6223	0.170533	0	-7.20549	down
TraesCS2B01G141800	102	1	2.12675	0.0335361	2.55e-15	-5.36974	down
TraesCS2B01G141900	4837	402	62.9416	6.13905	0	-3.61931	down
TraesCS2B01G142000	149	31	3.69594	0.781241	1.65e-06	-2.2442	down
TraesCS2B01G143600	0	34	0	1.96014	2.76e-06	4.50496	up
TraesCS2B01G144900	1267	0	13.6438	0	0	-9.69708	down
TraesCS2B01G145100	586	0	22.2123	0	0	-8.58666	down
TraesCS2B01G145700	929	148	5.71403	1.07972	1.13e-12	-2.67289	down
TraesCS2B01G145800	359	14	5.0551	0.237022	0	-4.56923	down
TraesCS2B01G146000	85	0	8.3199	0	1.72e-14	-5.82324	down
TraesCS2B01G146200	1374	1	64.6976	0.050064	0	-9.10163	down
TraesCS2B01G146400	115	4	3.30484	0.127378	5.08e-14	-4.42341	down
TraesCS2B01G147000	194	0	5.82235	0	0	-6.99938	down
TraesCS2B01G147200	156	15	4.31671	0.536652	1.32e-11	-3.2849	down
TraesCS2B01G147300	113	4	0.726911	0.028721	8.07e-14	-4.39843	down
TraesCS2B01G147400	85	16	3.65171	0.76362	1.95e-05	-2.33597	down
TraesCS2B01G147600	1126	156	14.4454	2.77461	1.28e-14	-2.87476	down
TraesCS2B01G147700	792	242	59.7385	17.2717	1.45e-05	-1.73959	down
TraesCS2B01G148200	999	151	30.6662	4.22774	2.15e-13	-2.74888	down
TraesCS2B01G148300	51	1	8.16322	0.171908	1.58e-08	-4.39088	down
TraesCS2B01G148600	612	100	10.56	1.99206	8.81e-12	-2.63033	down
TraesCS2B01G148800	601	201	1.58324	0.674212	0.000114728	-1.60826	down
TraesCS2B01G148900	362	10	7.57431	0.230518	0	-5.00968	down
TraesCS2B01G149000	659	28	5.79853	0.260006	0	-4.51721	down
TraesCS2B01G149500	126	3	2.21505	0.0761601	5.55e-16	-4.83923	down
TraesCS2B01G149600	98	0	0.674085	0	4.44e-16	-6.02518	down
TraesCS2B01G150200	222	29	3.37501	0.592375	4.05e-11	-2.90606	down
TraesCS2B01G150500	1149	129	3.58516	0.432071	0	-3.17506	down
TraesCS2B01G150800	181	16	3.25127	0.403191	6.14e-13	-3.41285	down
TraesCS2B01G150900	81	0	8.38857	0	5.64e-14	-5.75496	down
TraesCS2B01G151200	346	90	17.2376	4.50194	2.07e-06	-1.95986	down
TraesCS2B01G151600	4	48	0.0299088	0.425121	1.34e-05	3.12885	up
TraesCS2B01G152300	1033	10477	43.7196	225.402	0	3.30477	up
TraesCS2B01G152700	721	74	6.06547	0.688214	0	-3.29286	down
TraesCS2B01G152900	20657	6314	123.598	28.7487	3.14e-05	-1.74538	down
TraesCS2B01G153700	70	2	1.01736	0.0410479	2.01e-10	-4.36158	down
TraesCS2B01G154200	475	40	4.02483	0.360686	0	-3.55469	down
TraesCS2B01G154300	582	0	7.09036	0	0	-8.5768	down
TraesCS2B01G157600	1104	104	6.2319	0.60945	0	-3.42414	down
TraesCS2B01G157900	246	34	7.58187	1.01786	4.76e-11	-2.83463	down
TraesCS2B01G158700	81	1	1.23893	0.0181905	8.22e-13	-5.04268	down
TraesCS2B01G158800	667	0	9.91062	0	0	-8.77299	down
TraesCS2B01G159700	894	275	16.0592	5.21762	1.54e-05	-1.73074	down
TraesCS2B01G160600	1158	68	18.7112	1.18308	0	-4.09463	down
TraesCS2B01G160900	0	88	0	0.794323	2.3e-14	5.83741	up
TraesCS2B01G162100	81	1	1.13843	0.0169282	8.22e-13	-5.04268	down
TraesCS2B01G162200	954	384	70.314	27.0897	0.00311886	-1.34494	down
TraesCS2B01G162500	156	51	0.838548	0.298612	0.000951739	-1.61902	down
TraesCS2B01G163100	164	0	3.60671	0	0	-6.75908	down
TraesCS2B01G163300	0	174	0	6.59897	0	6.80839	up
TraesCS2B01G163800	2	37	0.0509297	0.945022	3.9e-05	3.41471	up
TraesCS2B01G164800	55	5	1.50314	0.151137	2.44e-06	-3.14141	down
TraesCS2B01G165500	137	48	2.25817	1.15934	0.00340937	-1.51837	down
TraesCS2B01G165800	329	71	3.19644	1.06087	5.83e-08	-2.22302	down
TraesCS2B01G166300	498	180	1.8093	0.721362	0.000575592	-1.49569	down
TraesCS2B01G166500	57	0	1.34926	0	1.53e-10	-5.2592	down
TraesCS2B01G167500	518	111	12.411	3.17478	1.06e-08	-2.24205	down
TraesCS2B01G167800	331	121	12.3968	4.39551	0.00108315	-1.47554	down
TraesCS2B01G167900	573	41	8.72802	0.633614	0	-3.79021	down
TraesCS2B01G168000	175	2	4.27566	0.0594828	0	-5.6649	down
TraesCS2B01G168300	1656	71	98.7739	3.91709	0	-4.54921	down
TraesCS2B01G168500	81	4	4.95089	0.263269	2.68e-10	-3.92569	down
TraesCS2B01G169300	710	50	6.00322	0.534972	0	-3.82204	down
TraesCS2B01G170500	0	58	2e-05	1.91644	2.59e-10	5.24895	up
TraesCS2B01G171300	2356	544	132.483	32.2043	9.74e-09	-2.14707	down
TraesCS2B01G171600	2493	296	23.044	2.99983	0	-3.10311	down
TraesCS2B01G172100	408	108	4.78604	1.30985	1.92e-06	-1.93778	down
TraesCS2B01G172400	115	0	1.24347	0	0	-6.25268	down
TraesCS2B01G172600	8	154	0.109484	2.06111	3.21e-14	3.99356	up
TraesCS2B01G174500	415	28	9.26612	0.596254	0	-3.85201	down
TraesCS2B01G175400	81	0	0.712884	0	5.64e-14	-5.75496	down
TraesCS2B01G175500	122	35	0.943456	0.305191	0.000391658	-1.79187	down
TraesCS2B01G176700	59	209	0.49227	1.92609	0.000110332	1.76297	up
TraesCS2B01G177300	143	2	2.83275	0.0458411	0	-5.37635	down
TraesCS2B01G177500	2256	603	44.8191	11.9443	4.37e-07	-1.9364	down
TraesCS2B01G178500	355	49	9.24206	1.24067	2.95e-12	-2.85339	down
TraesCS2B01G178800	665	97	13.3824	2.32648	3.43e-13	-2.79312	down
TraesCS2B01G179500	47	1	0.677315	0.0173564	7.04e-08	-4.27661	down
TraesCS2B01G179600	107	31	0.643325	0.212002	0.000754495	-1.77224	down
TraesCS2B01G180600	2147	258	26.0616	2.65809	0	-3.0848	down
TraesCS2B01G180900	141	14	1.16971	0.144204	6.97e-11	-3.23036	down
TraesCS2B01G182000	96	25	11.0355	2.70335	0.000351514	-1.91184	down
TraesCS2B01G182700	738	104	10.0045	1.32733	8.94e-14	-2.84408	down
TraesCS2B01G182800	374	0	3.26336	0	0	-7.94092	down
TraesCS2B01G182900	38	3	1.53339	0.13527	6.34e-05	-3.14937	down
TraesCS2B01G183100	51	10	2.83848	0.547124	0.000958813	-2.21877	down
TraesCS2B01G183500	175	5	15.2848	0.479092	0	-4.78427	down
TraesCS2B01G183700	1817	257	31.1879	7.04326	8.1e-15	-2.84979	down
TraesCS2B01G184400	2	99	3.40514	111.612	1.81e-13	4.79744	up
TraesCS2B01G184500	59	185	0.441942	1.45898	0.00096178	1.58839	up
TraesCS2B01G184700	1145	0	202.214	0	0	-9.5512	down
TraesCS2B01G185100	374	77	12.8921	2.4832	1.32e-08	-2.29256	down
TraesCS2B01G185800	235	37	1.82641	0.305782	7.7e-10	-2.65222	down
TraesCS2B01G186600	12	64	0.0933061	0.497393	0.000286807	2.24136	up
TraesCS2B01G187400	2033	8	23.1801	0.124264	0	-7.76812	down
TraesCS2B01G188200	124	29	3.09633	0.80427	2.47e-05	-2.07362	down
TraesCS2B01G189000	244	0	105.207	0	0	-7.32789	down
TraesCS2B01G189100	1048	57	32.5479	1.76524	0	-4.19915	down
TraesCS2B01G189500	147	3	7.55491	0.177384	0	-5.05915	down
TraesCS2B01G189900	248	10	20.6478	1.06721	0	-4.46681	down
TraesCS2B01G190200	156	56	4.74316	2.63423	0.00334645	-1.48793	down
TraesCS2B01G190400	505	127	25.8876	6.78491	4.05e-07	-2.01375	down
TraesCS2B01G191900	201	43	2.00308	0.536559	4.8e-07	-2.21972	down
TraesCS2B01G192700	704	0	12.502	0	0	-8.8507	down
TraesCS2B01G192900	94	2	1.01263	0.0377961	2.02e-13	-4.779	down
TraesCS2B01G193000	192	58	1.82008	0.595013	0.000161599	-1.7356	down
TraesCS2B01G193200	132	44	3.5978	1.20427	0.00202046	-1.58673	down
TraesCS2B01G193500	849	74	65.744	5.37594	0	-3.52817	down
TraesCS2B01G194900	14	87	0.067734	0.384741	7.24e-06	2.47624	up
TraesCS2B01G195300	284	112	4.46945	2.07655	0.0043324	-1.36572	down
TraesCS2B01G196000	44	129	1.45769	4.03211	0.00591773	1.48433	up
TraesCS2B01G196800	40	0	0.740539	0	1.13e-07	-4.76416	down
TraesCS2B01G196900	717	278	19.1018	7.63802	0.00166442	-1.39748	down
TraesCS2B01G197100	248	41	1.66682	0.296225	1.33e-09	-2.58704	down
TraesCS2B01G197200	620	266	118.517	45.862	0.00967184	-1.25155	down
TraesCS2B01G197400	181	49	8.3856	1.90734	3.62e-05	-1.88749	down
TraesCS2B01G198100	926	110	93.9296	9.83559	2.22e-16	-3.09111	down
TraesCS2B01G198400	647	140	41.5122	8.92746	7.52e-09	-2.23131	down
TraesCS2B01G198500	62	218	2.40374	8.31692	0.000109398	1.75356	up
TraesCS2B01G198900	725	254	59.3075	19.3659	0.000249347	-1.54294	down
TraesCS2B01G199400	70	0	2.61447	0	1.77e-12	-5.54858	down
TraesCS2B01G199500	481	87	3.22826	1.78738	2.68e-10	-2.48141	down
TraesCS2B01G199700	47	1	1.89801	0.0707473	7.04e-08	-4.27661	down
TraesCS2B01G199800	117	3	9.70491	0.279691	5.11e-15	-4.73364	down
TraesCS2B01G200100	81	257	3.73529	11.0701	0.000372489	1.61195	up
TraesCS2B01G201100	0	63	6.8e-05	6.37307	4.72e-11	5.36523	up
TraesCS2B01G201700	244	69	4.93641	3.26894	2.66e-05	-1.83446	down
TraesCS2B01G203900	533	56	6.6323	1.42939	3.33e-16	-3.25059	down
TraesCS2B01G204500	263	0	9.40416	0	0	-7.43542	down
TraesCS2B01G204800	98	24	1.48239	0.389427	0.000155182	-1.99648	down
TraesCS2B01G206500	19	124	0.461044	3.06469	2.36e-07	2.57715	up
TraesCS2B01G206900	124	41	0.540869	0.281548	0.00221325	-1.59585	down
TraesCS2B01G207100	323	128	3.9972	2.98988	0.00403478	-1.36028	down
TraesCS2B01G207400	246	0	5.3786	0	0	-7.33959	down
TraesCS2B01G207700	21	76	0.394502	3.05898	0.00384026	1.74807	up
TraesCS2B01G208400	248	63	2.53596	0.955585	3.85e-06	-1.98597	down
TraesCS2B01G208900	72	14	0.773575	0.1443	8.76e-05	-2.27548	down
TraesCS2B01G209000	135	17	4.01272	0.50055	2.69e-09	-2.91405	down
TraesCS2B01G209200	588	101	7.70898	1.72214	3.57e-11	-2.55863	down
TraesCS2B01G209400	164	0	1.03145	0	0	-6.75908	down
TraesCS2B01G209600	507	190	4.6595	1.803	0.00107925	-1.44411	down
TraesCS2B01G210000	381	135	39.1137	12.7975	0.000534638	-1.52159	down
TraesCS2B01G210900	2	436	0.144513	28.0454	0	6.91879	up
TraesCS2B01G211900	49	3	1.6149	0.110498	1.17e-06	-3.50357	down
TraesCS2B01G213200	158	32	2.22287	0.439817	7.72e-07	-2.28434	down
TraesCS2B01G213400	7286	1534	101.762	19.0901	8.25e-10	-2.28228	down
TraesCS2B01G213600	834	55	12.0957	0.92174	0	-3.92029	down
TraesCS2B01G216200	148	42	4.88821	1.3316	0.000157869	-1.81475	down
TraesCS2B01G216300	111	21	4.3663	0.771836	3.07e-06	-2.35366	down
TraesCS2B01G216400	1447	466	26.2351	9.22109	3.57e-05	-1.66697	down
TraesCS2B01G217500	10	95	0.211871	1.90467	4.07e-08	3.03073	up
TraesCS2B01G218100	51	8	0.54477	0.116107	0.000190573	-2.49266	down
TraesCS2B01G218600	1132	367	33.8327	10.5396	4.31e-05	-1.65645	down
TraesCS2B01G218900	719	258	6.5684	2.52538	0.000396587	-1.50858	down
TraesCS2B01G219000	488	127	5.15543	1.88595	9.08e-07	-1.9645	down
TraesCS2B01G219200	5411	2031	216.476	82.2918	0.00140867	-1.44862	down
TraesCS2B01G219400	83	734	2.20829	19.452	1.67e-15	3.08573	up
TraesCS2B01G219800	254	12	12.375	0.936277	0	-4.27099	down
TraesCS2B01G220100	849	148	63.526	10.346	1.64e-11	-2.5432	down
TraesCS2B01G220200	164	50	7.64834	2.9526	0.000305156	-1.7182	down
TraesCS2B01G220600	682	1	12.818	0.0233003	0	-8.09272	down
TraesCS2B01G220700	586	81	9.94471	1.37904	1.55e-13	-2.86665	down
TraesCS2B01G220900	137	45	1.9523	0.663488	0.00149468	-1.60844	down
TraesCS2B01G222400	473	37	14.5306	1.67414	0	-3.6567	down
TraesCS2B01G223200	94	30	3.47749	1.12533	0.00374023	-1.63316	down
TraesCS2B01G223600	2078	508	21.0659	5.10508	4.53e-08	-2.06454	down
TraesCS2B01G223700	59	2	0.984093	0.0397955	7.02e-09	-4.12068	down
TraesCS2B01G225000	0	55	2.55e-07	0.3884	7.44e-10	5.17439	up
TraesCS2B01G225300	325	25	1.92758	0.364553	0	-3.65516	down
TraesCS2B01G226600	224	58	5.67089	1.43466	7.81e-06	-1.95636	down
TraesCS2B01G226700	303	111	1.43151	0.574356	0.00126497	-1.47142	down
TraesCS2B01G226800	177	1	25.4674	0.156028	0	-6.15587	down
TraesCS2B01G227000	545	69	7.43314	0.974564	2.52e-14	-2.98887	down
TraesCS2B01G227400	171	670	3.72169	15.5002	1.21e-06	1.92507	up
TraesCS2B01G227600	449	182	13.3287	4.77764	0.00439782	-1.33094	down
TraesCS2B01G228300	113	0	5.24388	0	0	-6.2277	down
TraesCS2B01G229000	732	80	19.7594	2.07355	0	-3.20443	down
TraesCS2B01G229400	23	150	0.393519	2.52801	5.15e-08	2.59181	up
TraesCS2B01G230800	389	151	13.7034	5.09013	0.00242595	-1.39161	down
TraesCS2B01G231500	363	76	13.1261	2.67072	2.12e-08	-2.26815	down
TraesCS2B01G231600	139	23	3.23004	0.585548	9.35e-08	-2.55172	down
TraesCS2B01G232000	34	0	0.955137	0	1.51e-06	-4.53904	down
TraesCS2B01G232100	36	112	9.83857	24.5531	0.0044589	1.56186	up
TraesCS2B01G232400	323	65	9.58698	1.88365	1.51e-08	-2.3211	down
TraesCS2B01G232900	822	144	24.3882	4.34737	2.04e-11	-2.53576	down
TraesCS2B01G233000	36	0	2.67679	0	6.26e-07	-4.61805	down
TraesCS2B01G233400	1374	282	88.3266	16.9805	5.59e-10	-2.31385	down
TraesCS2B01G234300	282	91	4.81414	1.85232	0.000175877	-1.65056	down
TraesCS2B01G234400	34	2	1.41364	0.0879422	7.15e-05	-3.35204	down
TraesCS2B01G234700	2	62	0.0682585	2.09422	6.26e-09	4.13563	up
TraesCS2B01G235700	284	42	4.85863	0.77573	5.95e-11	-2.74797	down
TraesCS2B01G236100	23	177	0.229127	1.75185	1.06e-09	2.82832	up
TraesCS2B01G236400	70	5	0.912126	0.0750433	2.63e-08	-3.48096	down
TraesCS2B01G236600	42	2	0.314191	0.0183189	3.07e-06	-3.64502	down
TraesCS2B01G238400	72	16	1.24922	0.463759	0.000316584	-2.1011	down
TraesCS2B01G238900	1033	357	14.5503	5.86605	0.000167036	-1.56428	down
TraesCS2B01G239200	139	1	7.29066	0.0481462	0	-5.81058	down
TraesCS2B01G239800	1575	2	64.1685	0.0885446	0	-8.82368	down
TraesCS2B01G240000	6389	1461	588.161	125.957	8.33e-09	-2.16306	down
TraesCS2B01G241100	246	92	6.94037	3.1268	0.00239127	-1.43915	down
TraesCS2B01G241200	59	2837	1.34475	58.7862	0	5.51579	up
TraesCS2B01G241600	40	0	0.518076	0	1.13e-07	-4.76416	down
TraesCS2B01G241700	0	164	0	2.69745	0	6.72379	up
TraesCS2B01G242100	2889	597	36.4528	10.1847	4.34e-10	-2.30737	down
TraesCS2B01G242500	505	153	6.85521	2.09054	1.98e-05	-1.74804	down
TraesCS2B01G242600	877	101	9.62783	1.85673	2.22e-16	-3.13415	down
TraesCS2B01G242800	34	175	0.711475	3.89078	6.43e-07	2.27755	up
TraesCS2B01G243700	515	109	12.8115	2.0861	8.14e-09	-2.25956	down
TraesCS2B01G244000	755	276	13.1662	5.26995	0.000552726	-1.48218	down
TraesCS2B01G244100	588	40	53.9996	3.45344	0	-3.86169	down
TraesCS2B01G244600	0	314	0	6.62288	0	7.65432	up
TraesCS2B01G245000	92	1174	1.00655	13.6164	0	3.61619	up
TraesCS2B01G245100	0	48	0	1.55467	9.7e-09	4.98381	up
TraesCS2B01G245700	242	0	1.20291	0	0	-7.31609	down
TraesCS2B01G245900	670	25	18.9083	1.0225	0	-4.6954	down
TraesCS2B01G246000	94	313	12.52	37.3518	0.000110631	1.68374	up
TraesCS2B01G247700	276	43	9.33772	1.47073	2.05e-10	-2.67423	down
TraesCS2B01G248400	34	182	0.487871	2.79955	2.73e-07	2.33364	up
TraesCS2B01G248500	342	0	21.5395	0	0	-7.81243	down
TraesCS2B01G250400	6	101	0.0660771	0.943142	9.56e-11	3.73248	up
TraesCS2B01G251300	1457	76	22.2165	1.46884	0	-4.26856	down
TraesCS2B01G252300	2	36	0.0399355	0.466353	5.72e-05	3.37681	up
TraesCS2B01G252800	115	10	1.00357	0.0492117	1.87e-10	-3.36829	down
TraesCS2B01G253000	143	4	0.711436	0.192996	2.22e-16	-4.73408	down
TraesCS2B01G254600	259	12	8.63863	0.631402	0	-4.29895	down
TraesCS2B01G255800	96	1	3.88479	0.0464164	1.2e-14	-5.28361	down
TraesCS2B01G256100	428	175	9.8155	4.33208	0.00520889	-1.31817	down
TraesCS2B01G256700	184	474	7.83672	23.1852	0.00500405	1.32238	up
TraesCS2B01G256800	299	3531	3.84403	46.4899	0	3.51952	up
TraesCS2B01G257300	490	120	2.83012	0.819096	2.43e-07	-2.05115	down
TraesCS2B01G258000	1519	0	32.0438	0	0	-9.9585	down
TraesCS2B01G259000	601	1	5.21067	0.161558	0	-7.91075	down
TraesCS2B01G259200	273	49	1.11075	0.218773	3.58e-09	-2.47633	down
TraesCS2B01G259300	173	30	2.64413	1.54185	3.68e-08	-2.50262	down
TraesCS2B01G259400	126	0	3.07309	0	0	-6.38282	down
TraesCS2B01G259500	742	0	4.64993	0	0	-8.92639	down
TraesCS2B01G259600	64	0	0.699011	0	1.31e-11	-5.42219	down
TraesCS2B01G259800	53	0	8.09926	0	6.62e-10	-5.15708	down
TraesCS2B01G261000	199	511	1.3856	3.63247	0.00506544	1.31831	up
TraesCS2B01G261400	607	116	2.93853	0.768598	4.42e-10	-2.40747	down
TraesCS2B01G261800	181	5	2.23761	0.269236	0	-4.83249	down
TraesCS2B01G261900	2	68	0.0203876	0.62718	9.65e-10	4.26575	up
TraesCS2B01G262800	5	69	0.687236	7.98371	8.51e-08	3.3986	up
TraesCS2B01G263200	770	83	8.62385	1.04235	0	-3.22519	down
TraesCS2B01G263500	1380	473	8.08591	3.28734	0.000135994	-1.57721	down
TraesCS2B01G263600	19	528	0.121995	3.53903	0	4.65351	up
TraesCS2B01G266000	1203	82	30.7148	1.9159	0	-3.88502	down
TraesCS2B01G266900	276	56	1.49019	0.384758	3.7e-08	-2.30496	down
TraesCS2B01G267700	888	120	13.155	5.36521	1.38e-14	-2.90692	down
TraesCS2B01G268800	757	238	12.616	2.9627	2.74e-05	-1.6984	down
TraesCS2B01G269300	188	2	11.0627	0.131258	0	-5.76741	down
TraesCS2B01G269400	423	129	35.7712	13.553	2.95e-05	-1.7367	down
TraesCS2B01G270200	55	4	4.38092	0.31878	6.57e-07	-3.37977	down
TraesCS2B01G270600	256	61	1.19799	0.311183	1.07e-06	-2.07689	down
TraesCS2B01G270700	0	862	0.000508242	10.1125	0	9.10668	up
TraesCS2B01G271200	93	3	2.53381	0.11439	1.89e-12	-4.40723	down
TraesCS2B01G271700	2547	674	35.3283	9.1235	3.4e-07	-1.95112	down
TraesCS2B01G271900	2626	939	23.8474	9.16101	0.000370177	-1.51773	down
TraesCS2B01G272200	0	114	0	0.95223	0	6.2051	up
TraesCS2B01G272300	687	145	227.957	41.6523	3.59e-09	-2.26759	down
TraesCS2B01G272600	145	32	0.937647	0.276305	4.62e-06	-2.16171	down
TraesCS2B01G272900	0	153	0	6.52902	0	6.6246	up
TraesCS2B01G273000	400	0	3.23052	0	0	-8.0375	down
TraesCS2B01G273400	244	2	23.8155	0.219658	0	-6.14089	down
TraesCS2B01G273800	214	65	1.31793	0.421764	0.00012773	-1.73063	down
TraesCS2B01G273900	1626	71	74.4815	3.01891	0	-4.52286	down
TraesCS2B01G274900	104	12	3.41166	0.438106	1.44e-08	-2.99514	down
TraesCS2B01G275900	53	3	2.13977	0.140091	2.94e-07	-3.61349	down
TraesCS2B01G276000	47	1	2.63055	0.0621211	7.04e-08	-4.27661	down
TraesCS2B01G276100	34	0	0.738604	0	1.51e-06	-4.53904	down
TraesCS2B01G276200	89	0	9.28176	0	5.44e-15	-5.88844	down
TraesCS2B01G276500	498	0	20.7554	0	0	-8.35257	down
TraesCS2B01G277000	98	0	10.3511	0	4.44e-16	-6.02518	down
TraesCS2B01G277300	488	170	15.0751	5.10168	0.000300084	-1.54825	down
TraesCS2B01G277900	23	101	0.546611	2.33685	0.000126129	2.02842	up
TraesCS2B01G278000	233	0	6.49615	0	0	-7.26176	down
TraesCS2B01G278100	17	269	0.846108	19.5066	1.11e-16	3.83256	up
TraesCS2B01G278400	220	4	146.451	2.59224	0	-5.35022	down
TraesCS2B01G278500	505	38	21.5981	2.24998	0	-3.71392	down
TraesCS2B01G278700	3574	976	20.4124	18.8735	7.9e-07	-1.90651	down
TraesCS2B01G278800	3395	1340	585.201	206.406	0.00303414	-1.37577	down
TraesCS2B01G279400	130	20	1.69064	0.299373	5.85e-08	-2.64414	down
TraesCS2B01G280400	151	12	1.42395	0.209258	1.6e-12	-3.52659	down
TraesCS2B01G280500	130	32	3.09698	3.28753	3.86e-05	-2.00591	down
TraesCS2B01G280600	7513	105	115.771	1.73415	0	-6.17548	down
TraesCS2B01G284200	102	1	2.77828	0.0851498	2.55e-15	-5.36974	down
TraesCS2B01G285400	411	150	5.62709	2.00373	0.000817419	-1.48017	down
TraesCS2B01G285600	0	105	1.65e-06	2.23978	3.33e-16	6.08813	up
TraesCS2B01G285900	817	54	26.2215	1.88102	0	-3.91637	down
TraesCS2B01G286300	293	71	19.0893	4.46889	8.86e-07	-2.05666	down
TraesCS2B01G286900	55	3	1.50551	0.103151	1.5e-07	-3.66546	down
TraesCS2B01G287200	344	51	5.19338	0.936491	1.71e-11	-2.75221	down
TraesCS2B01G287700	301	108	10.6747	5.81227	0.000912904	-1.50089	down
TraesCS2B01G288100	1031	387	84.6233	30.7482	0.000852655	-1.44557	down
TraesCS2B01G288600	406	75	15.4975	3.28991	8.82e-10	-2.44774	down
TraesCS2B01G289100	254	98	5.68855	2.16891	0.00362381	-1.39538	down
TraesCS2B01G289200	370	37	13.4266	1.84376	1.89e-15	-3.30368	down
TraesCS2B01G289400	203	56	4.58504	1.32641	3.2e-05	-1.86462	down
TraesCS2B01G289700	6	36	0.357648	1.91627	0.00567307	2.28344	up
TraesCS2B01G290100	8	75	0.0717282	0.632573	5.92e-07	2.97081	up
TraesCS2B01G290200	207	62	8.50224	4.5965	0.000112628	-1.74953	down
TraesCS2B01G290300	154	54	2.72763	1.01126	0.00253621	-1.52051	down
TraesCS2B01G290400	188	38	7.00809	1.40767	2.66e-07	-2.29569	down
TraesCS2B01G290500	4429	733	30.5094	5.2625	5.35e-13	-2.62814	down
TraesCS2B01G291000	156	462	9.50761	27.0859	0.000485363	1.52154	up
TraesCS2B01G291300	383	107	5.24429	1.47239	6.52e-06	-1.86014	down
TraesCS2B01G292100	338	0	13.3262	0	0	-7.79553	down
TraesCS2B01G292500	515	16	2.76401	0.0957677	0	-4.91358	down
TraesCS2B01G292900	0	57	0	1.16153	3.67e-10	5.22452	up
TraesCS2B01G293000	44	5	0.370865	0.0589888	8.76e-05	-2.8292	down
TraesCS2B01G293400	160	47	0.786359	0.251162	0.000193958	-1.76938	down
TraesCS2B01G293700	100	24	2.53453	0.590988	0.000109749	-2.02518	down
TraesCS2B01G295600	237	21	3.64557	0.127791	2.2e-14	-3.43753	down
TraesCS2B01G296000	1267	517	20.6084	8.73358	0.0040708	-1.32618	down
TraesCS2B01G296400	72	15	4.08553	0.709222	0.000169906	-2.18566	down
TraesCS2B01G297300	0	34	0	1.26919	2.76e-06	4.50496	up
TraesCS2B01G297700	85	1879	2.74731	56.6679	0	4.40623	up
TraesCS2B01G298000	798	294	17.0877	6.63471	0.000628219	-1.47129	down
TraesCS2B01G299300	378	123	2.17542	0.754253	0.000119224	-1.64292	down
TraesCS2B01G299900	62	0	29.0173	0	2.61e-11	-5.37747	down
TraesCS2B01G300000	96	0	9.8628	0	7.77e-16	-5.99589	down
TraesCS2B01G300900	192	61	5.129	1.6376	0.000348576	-1.66471	down
TraesCS2B01G302000	21	193	0.365785	3.25885	2.85e-11	3.07483	up
TraesCS2B01G302400	757	83	24.2799	2.57638	1.11e-16	-3.20067	down
TraesCS2B01G302600	1213	456	56.3993	47.1749	0.000873837	-1.44397	down
TraesCS2B01G303100	753	315	9.2914	3.05684	0.0061892	-1.28869	down
TraesCS2B01G304400	413	52	15.3576	1.63089	1.32e-13	-2.98769	down
TraesCS2B01G307100	8796	3390	612.495	227.007	0.0032018	-1.41077	down
TraesCS2B01G307500	359	75	2.53711	0.552234	2.11e-08	-2.27095	down
TraesCS2B01G308000	1646	601	33.8293	12.6328	0.000505435	-1.48673	down
TraesCS2B01G308400	66	0	2.55072	0	6.66e-12	-5.46556	down
TraesCS2B01G308500	650	210	27.9303	8.43757	5.41e-05	-1.65834	down
TraesCS2B01G308700	117	5	6.53783	0.318271	1.7e-13	-4.2096	down
TraesCS2B01G309500	408	134	3.10703	1.0988	0.000125931	-1.63059	down
TraesCS2B01G309900	772	233	5.64476	1.90522	1.14e-05	-1.75708	down
TraesCS2B01G310200	87	4	2.70246	0.151509	5.24e-11	-4.02694	down
TraesCS2B01G310800	62	5	2.17419	0.197286	2.8e-07	-3.30984	down
TraesCS2B01G311000	246	742	15.7422	45.4607	0.000241832	1.55124	up
TraesCS2B01G311900	1173	215	20.8043	3.44954	3.19e-11	-2.47482	down
TraesCS2B01G312000	1119	254	71.4461	15.5391	9.84e-09	-2.16803	down
TraesCS2B01G312500	201	38	9.48597	7.00395	5.75e-08	-2.3914	down
TraesCS2B01G312600	849	31	187.888	6.29325	0	-4.74253	down
TraesCS2B01G313500	415	35	43.4384	3.34766	0	-3.54545	down
TraesCS2B01G314500	38	7	1.28911	0.227783	0.00422387	-2.24174	down
TraesCS2B01G314900	70	0	2.76549	0	1.77e-12	-5.54858	down
TraesCS2B01G315100	1468	302	50.5708	9.75583	5.57e-10	-2.31089	down
TraesCS2B01G315600	169	0	9.71822	0	0	-6.80201	down
TraesCS2B01G318000	49	9	0.859179	0.128485	0.000780304	-2.29323	down
TraesCS2B01G318300	166	35	6.38058	2.94751	1.08e-06	-2.23144	down
TraesCS2B01G318600	203	67	7.62962	2.41869	0.000535482	-1.61235	down
TraesCS2B01G319600	49	144	2.00442	5.55818	0.00432736	1.49089	up
TraesCS2B01G320000	151	25	6.11929	1.0208	4.93e-08	-2.55702	down
TraesCS2B01G320700	143	35	4.53671	1.06412	2.23e-05	-2.01838	down
TraesCS2B01G320800	644	104	2.42916	0.43276	5.38e-12	-2.64795	down
TraesCS2B01G321000	2761	1008	38.795	18.0679	0.000580715	-1.48788	down
TraesCS2B01G321300	306	91	12.4179	12.8925	3.52e-05	-1.76778	down
TraesCS2B01G321500	36	0	0.329071	0	6.26e-07	-4.61805	down
TraesCS2B01G322300	49	2	0.252487	0.012766	2.28e-07	-3.86016	down
TraesCS2B01G322400	1451	570	23.9911	9.68565	0.00206459	-1.3812	down
TraesCS2B01G322800	62	1	1.39658	0.0462109	3.29e-10	-4.66519	down
TraesCS2B01G324200	513	213	9.98745	5.47662	0.00605097	-1.29745	down
TraesCS2B01G324800	190	27	4.25982	1.0894	6.73e-10	-2.78079	down
TraesCS2B01G325200	376	125	5.96865	3.25399	0.000176982	-1.61231	down
TraesCS2B01G326200	42	7	1.0524	0.169761	0.0012027	-2.38081	down
TraesCS2B01G326300	1986	555	22.8703	6.72407	1.32e-06	-1.87197	down
TraesCS2B01G326500	205	2	3.05671	0.0244588	0	-5.89134	down
TraesCS2B01G326800	34	1	2.56088	0.0855564	1.31e-05	-3.82675	down
TraesCS2B01G327300	263	60	1.84991	0.440727	4.29e-07	-2.13883	down
TraesCS2B01G327500	134	49	2.34486	0.824433	0.00612924	-1.45797	down
TraesCS2B01G327800	248	0	6.61764	0	0	-7.3512	down
TraesCS2B01G328100	181	0	3.54266	0	0	-6.90012	down
TraesCS2B01G328800	6	61	0.191467	1.80443	2.84e-06	3.01938	up
TraesCS2B01G329500	98	0	0.648218	0	4.44e-16	-6.02518	down
TraesCS2B01G329600	282	1608	4.05544	23.4098	3.33e-11	2.46948	up
TraesCS2B01G330300	72	5	3.06419	0.213833	1.48e-08	-3.52074	down
TraesCS2B01G332200	49	251	2.78201	13.4293	9.86e-08	2.28588	up
TraesCS2B01G332400	340	45	16.7076	1.91537	1.62e-12	-2.91027	down
TraesCS2B01G333900	657	49	31.5652	2.29377	0	-3.73862	down
TraesCS2B01G334200	53	5	1.66326	0.168899	4.6e-06	-3.08945	down
TraesCS2B01G334800	336	56	9.01969	1.72661	2.41e-10	-2.58733	down
TraesCS2B01G335300	74	23	3.16584	0.954016	0.00699721	-1.65595	down
TraesCS2B01G335500	68	7	2.03323	0.213566	5.45e-07	-3.05646	down
TraesCS2B01G336000	139	380	10.2173	23.2959	0.00227872	1.40545	up
TraesCS2B01G336200	77	8	1.92419	0.206643	1.46e-07	-3.07278	down
TraesCS2B01G336300	104	0	4.80118	0	1.11e-16	-6.10963	down
TraesCS2B01G336400	710	208	23.4076	6.38298	6.5e-06	-1.79914	down
TraesCS2B01G336900	4	241	0.240346	25.4079	0	5.4198	up
TraesCS2B01G337300	164	16	4.01117	0.375368	8.8e-12	-3.27181	down
TraesCS2B01G337400	29	138	0.507533	2.3468	8.04e-06	2.15711	up
TraesCS2B01G337500	0	60	0	1.62359	1.3e-10	5.29659	up
TraesCS2B01G338900	55	0	0.867491	0	3.16e-10	-5.20904	down
TraesCS2B01G339200	79	14	2.38835	0.434967	1.79e-05	-2.40668	down
TraesCS2B01G339400	40	0	2.01504	0	1.13e-07	-4.76416	down
TraesCS2B01G340300	57	0	4.63649	0	1.53e-10	-5.2592	down
TraesCS2B01G340700	2902	1202	31.201	14.0781	0.00703405	-1.30612	down
TraesCS2B01G342200	12502	3061	395.926	85.8682	7.52e-08	-2.06515	down
TraesCS2B01G342400	72	0	3.00459	0	9.28e-13	-5.58837	down
TraesCS2B01G342600	1059	83	10.8184	1.58305	0	-3.68418	down
TraesCS2B01G343600	646	8	20.3615	0.21936	0	-6.11644	down
TraesCS2B01G343900	81	1	10.1427	0.131985	8.22e-13	-5.04268	down
TraesCS2B01G344600	1121	374	42.7761	16.9278	7.93e-05	-1.61524	down
TraesCS2B01G345300	389	58	73.13	25.1098	9.05e-12	-2.74848	down
TraesCS2B01G346500	51	9	0.304642	0.0759337	0.00044314	-2.34923	down
TraesCS2B01G346800	301	55	19.5171	3.29708	2.98e-09	-2.45468	down
TraesCS2B01G347800	263	63	4.42573	1.11506	1.06e-06	-2.07019	down
TraesCS2B01G347900	119	9	0.702119	0.0759303	2.6e-11	-3.54744	down
TraesCS2B01G348500	500	194	16.4962	6.4243	0.00198811	-1.3943	down
TraesCS2B01G348800	166	0	11.941	0	0	-6.7764	down
TraesCS2B01G350500	156	48	3.88926	1.18686	0.000409534	-1.7038	down
TraesCS2B01G350600	5390	1038	214.067	50.3581	5.51e-11	-2.41034	down
TraesCS2B01G350900	87	0	2.28624	0	9.55e-15	-5.85621	down
TraesCS2B01G351100	411	112	9.09189	3.08398	3.4e-06	-1.89658	down
TraesCS2B01G351400	500	103	2.06798	0.460258	4.78e-09	-2.29754	down
TraesCS2B01G351500	280	36	43.2497	5.0184	4.08e-12	-2.94139	down
TraesCS2B01G352100	216	0	10.7184	0	0	-7.1532	down
TraesCS2B01G354300	111	14	2.23506	0.370948	2.02e-08	-2.8894	down
TraesCS2B01G354400	2350	683	19.6034	7.68789	3.41e-06	-1.81596	down
TraesCS2B01G355900	134	1	4.12094	0.0355978	0	-5.75831	down
TraesCS2B01G356100	151	0	5.21065	0	0	-6.64108	down
TraesCS2B01G356400	106	10	4.02257	0.512301	1.28e-09	-3.25232	down
TraesCS2B01G356500	590	190	11.7473	3.73075	5.55e-05	-1.66223	down
TraesCS2B01G357400	34	5	0.53733	0.0975809	0.00272527	-2.47141	down
TraesCS2B01G359000	87	14	5.38907	0.811347	3.05e-06	-2.54332	down
TraesCS2B01G359300	991	2532	59.5965	144.834	0.00604459	1.31637	up
TraesCS2B01G359400	188	65	6.57911	1.94075	0.00128005	-1.54517	down
TraesCS2B01G360300	2870	0	44.7019	0	0	-10.8757	down
TraesCS2B01G360500	406	2	27.4921	0.235882	0	-6.8719	down
TraesCS2B01G361000	194	49	0.652362	0.180466	9.07e-06	-1.98675	down
TraesCS2B01G362000	470	180	11.427	3.95215	0.00166031	-1.41247	down
TraesCS2B01G362600	567	163	11.4699	3.43879	5.73e-06	-1.82419	down
TraesCS2B01G362700	708	1907	7.54912	21.4738	0.00203569	1.39193	up
TraesCS2B01G363200	211	40	8.63023	1.31383	4.49e-08	-2.38979	down
TraesCS2B01G364300	44	255	4.54723	23.7402	9.27e-09	2.45888	up
TraesCS2B01G365500	274	12	2.72576	0.222057	0	-4.37971	down
TraesCS2B01G365900	389	29	14.9153	1.05415	0	-3.71103	down
TraesCS2B01G366700	237	82	3.13202	1.18136	0.000779633	-1.54879	down
TraesCS2B01G366800	117	20	1.23991	0.220455	5.64e-07	-2.494	down
TraesCS2B01G367100	143	2	2.92213	0.128851	0	-5.37635	down
TraesCS2B01G367300	5122	210	304.826	14.1235	0	-4.63358	down
TraesCS2B01G367500	49	4	4.74069	0.422149	4.8e-06	-3.21789	down
TraesCS2B01G367700	306	32	5.17436	0.815952	2.96e-14	-3.23125	down
TraesCS2B01G368200	681	51	14.8644	1.23095	0	-3.7343	down
TraesCS2B01G368600	53	5	0.830508	0.0883831	4.6e-06	-3.08945	down
TraesCS2B01G368700	154	8	2.88671	0.164639	7.77e-15	-4.05868	down
TraesCS2B01G369000	19747	1563	855.11	58.0074	0	-3.69353	down
TraesCS2B01G369100	2061	0	102.198	0	0	-10.3983	down
TraesCS2B01G369400	177	9	1.10543	0.0675266	4.44e-16	-4.11422	down
TraesCS2B01G370500	141	2	2.73157	0.354317	0	-5.35625	down
TraesCS2B01G370600	3373	503	66.9606	7.99305	2.2e-14	-2.77719	down
TraesCS2B01G370700	59	3	5.4861	0.309782	3.99e-08	-3.76409	down
TraesCS2B01G371100	423	170	24.24	12.2285	0.00398413	-1.34272	down
TraesCS2B01G371400	286	20	8.05985	1.03845	0	-3.77247	down
TraesCS2B01G371600	318	98	18.6644	4.52016	6.13e-05	-1.71784	down
TraesCS2B01G372700	1329	142	54.1911	6.96734	0	-3.24783	down
TraesCS2B01G373500	79	0	6.96913	0	1.04e-13	-5.71957	down
TraesCS2B01G374100	783	1	10.9335	0.0139065	0	-8.29154	down
TraesCS2B01G374600	571	77	14.6575	1.8658	9.46e-14	-2.90099	down
TraesCS2B01G376500	96	4	0.828877	0.0626221	5.02e-12	-4.16662	down
TraesCS2B01G376600	329	25	7.21838	0.461981	0	-3.67272	down
TraesCS2B01G376700	265	28	5.58035	0.684095	1.52e-13	-3.20788	down
TraesCS2B01G376800	1158	255	30.7631	7.21295	4.35e-09	-2.21176	down
TraesCS2B01G377200	72	10	1.17488	0.190468	3.8e-06	-2.70398	down
TraesCS2B01G378400	1787	414	20.8805	5.06218	1.17e-08	-2.14125	down
TraesCS2B01G379300	64	227	2.4805	8.27002	8.46e-05	1.7668	up
TraesCS2B01G379400	494	32	2.81447	0.205478	0	-3.9195	down
TraesCS2B01G379900	207	3	1.03767	0.0207822	0	-5.54866	down
TraesCS2B01G380900	0	1087	0	10.8773	0	9.44073	up
[truncated: 8,818 more rows]
