# Supplementary material for: Bulked Segregant RNA-Seq Provides Distinctive Expression Profile Against Powdery Mildew in the Wheat Genotype YD588
Source: Front Plant Sci. 2021 Dec 3;12:764978. doi: 10.3389/fpls.2021.764978 (PMC8677838; doi:10.3389/fpls.2021.764978)
Supplement: Supplementary file 5 [file Table_5.XLSX]

## Sheet: Table S5
Table S5. Differentially expressed genes (DEGs) betwwen the resistance and susceptible bulks derived from the F2:3 families of YD588 and Yannong 21 (YN21).
#ID	Susceptible bulk_Count	Resistance bulk_Count	Susceptible bulk_FPKM	Resistance bulk_FPKM	FDR	log2FC	regulated
TraesCS1A01G002400	38	6	8.48442	1.50223	0.00096673	-2.39887	down
TraesCS1A01G005500	122	52	3.89737	1.98882	0.00158573	-1.20709	down
TraesCS1A01G009400	177	593	0.798687	2.64205	0	1.73582	up
TraesCS1A01G009800	121	282	0.839079	1.88159	2.88e-06	1.21065	up
TraesCS1A01G010200	178	411	1.34174	3.23726	2.32e-07	1.20047	up
TraesCS1A01G015800	29	118	1.02655	4.1665	2.82e-08	1.97058	up
TraesCS1A01G017900	788	3151	9.07354	36.8412	0	1.9975	up
TraesCS1A01G018000	213	823	1.76107	7.2315	0	1.9426	up
TraesCS1A01G018600	140	480	1.72962	5.93233	4.44e-16	1.76682	up
TraesCS1A01G020300	16	54	0.110959	0.378291	0.00586167	1.66585	up
TraesCS1A01G021400	295	94	140.027	37.9284	3.37e-11	-1.63459	down
TraesCS1A01G035600	2200	855	95.2697	37.9821	5.27e-14	-1.36197	down
TraesCS1A01G035700	94	18	0.904424	0.191564	1.3e-08	-2.29277	down
TraesCS1A01G043900	1114	119	22.7898	2.50028	0	-3.21072	down
TraesCS1A01G045800	100	220	4.3068	9.70403	0.000105051	1.12592	up
TraesCS1A01G048700	99	39	14.4473	5.80186	0.00182836	-1.31147	down
TraesCS1A01G050200	43	9	1.06125	0.242648	0.00200036	-2.08475	down
TraesCS1A01G053600	15	56	0.265967	0.731812	0.00144677	1.80189	up
TraesCS1A01G057200	407	201	6.45866	3.06961	3.61e-05	-1.01246	down
TraesCS1A01G059200	67	21	2.13777	0.714644	0.00170012	-1.60672	down
TraesCS1A01G073300	592	270	10.6849	5.03369	2.06e-07	-1.12833	down
TraesCS1A01G111800	221	96	22.7172	10.1817	2.83e-05	-1.19044	down
TraesCS1A01G115700	1711	793	76.8947	34.3575	8.31e-09	-1.108	down
TraesCS1A01G121900	111	235	1.63867	5.80427	0.000198509	1.072	up
TraesCS1A01G140700	57	148	0.460786	1.2596	3.8e-05	1.35383	up
TraesCS1A01G141500	381	72	20.3685	3.98948	0	-2.37984	down
TraesCS1A01G141900	343	119	10.9655	3.78237	1.44e-10	-1.51557	down
TraesCS1A01G150800	65	2	0.899214	0.037058	1.59e-12	-4.25288	down
TraesCS1A01G150900	86	0	1.28445	0.00799342	0	-5.87827	down
TraesCS1A01G156400	851	369	19.8735	8.77084	2.54e-09	-1.20225	down
TraesCS1A01G165600	210	59	4.64186	1.34192	7.01e-11	-1.80587	down
TraesCS1A01G168000	57	0	2.64084	0	6.11e-13	-5.29732	down
TraesCS1A01G176700	479	219	4.21994	1.98093	7.66e-07	-1.1238	down
TraesCS1A01G181000	2503	370	51.5346	7.96038	0	-2.75313	down
TraesCS1A01G184400	287	130	3.91431	1.77496	1.5e-05	-1.13358	down
TraesCS1A01G186100	2251	1109	136.068	67.976	1.72e-07	-1.02033	down
TraesCS1A01G186400	119	54	6.09074	2.76685	0.00602131	-1.11865	down
TraesCS1A01G186500	614	293	35.9981	17.4108	1.26e-06	-1.06352	down
TraesCS1A01G186600	202	93	9.8168	4.53051	0.000264228	-1.10675	down
TraesCS1A01G189300	74	22	3.41997	1.05706	0.000324271	-1.68435	down
TraesCS1A01G198600	220	102	3.81896	1.65048	0.000181145	-1.09777	down
TraesCS1A01G203200	145	46	3.90954	1.2628	4.69e-07	-1.62516	down
TraesCS1A01G220300	974	1954	31.6435	64.7476	3.88e-07	1.00333	up
TraesCS1A01G225600	66	136	1.03369	2.12668	0.0095801	1.02661	up
TraesCS1A01G257200	201	99	4.84672	2.4668	0.00150394	-1.01082	down
TraesCS1A01G257400	518	51	13.8116	1.41667	0	-3.30705	down
TraesCS1A01G257900	110	47	2.25049	0.978724	0.0034375	-1.2012	down
TraesCS1A01G262700	59	16	2.11787	0.627308	0.000994447	-1.79032	down
TraesCS1A01G263700	613	165	26.2818	7.01675	0	-1.88397	down
TraesCS1A01G265600	7637	3606	4337.18	2077.35	9.5e-09	-1.08229	down
TraesCS1A01G265700	71	7	98.3543	9.34035	6.3e-10	-3.09435	down
TraesCS1A01G265800	176	24	240.218	30.7156	0	-2.79986	down
TraesCS1A01G265900	188	35	272.556	46.7508	1.78e-15	-2.37663	down
TraesCS1A01G266600	1075	303	11.639	3.3069	0	-1.82188	down
TraesCS1A01G267900	472	947	5.68094	11.475	1.76e-06	1.0023	up
TraesCS1A01G273600	109	49	1.66524	0.775015	0.00879032	-1.12989	down
TraesCS1A01G275400	128	57	0.880162	0.377581	0.00264925	-1.14661	down
TraesCS1A01G299100	1798	417	29.8067	7.00097	0	-2.10433	down
TraesCS1A01G300200	36	0	1.47155	0	1.28e-07	-4.6556	down
TraesCS1A01G303100	471	142	11.984	3.6795	3e-15	-1.71935	down
TraesCS1A01G304000	88	195	3.26646	7.33836	0.000200079	1.13468	up
TraesCS1A01G305200	51	113	0.538641	1.15677	0.00753535	1.12515	up
TraesCS1A01G317700	92	190	4.25784	18.0175	0.00136927	1.03441	up
TraesCS1A01G320900	466	141	5.54721	1.66783	4.22e-15	-1.71409	down
TraesCS1A01G349900	1941	636	54.1349	18.9779	0	-1.60744	down
TraesCS1A01G355600	28	87	0.18504	0.275353	0.000206345	1.58538	up
TraesCS1A01G364000	143	18	5.88068	0.680972	1.11e-16	-2.89033	down
TraesCS1A01G364800	98	39	2.93783	1.20154	0.0023421	-1.29704	down
TraesCS1A01G369600	29549	13696	338.932	160.37	7.96e-09	-1.10927	down
TraesCS1A01G384300	665	264	11.8546	4.81768	1.18e-10	-1.32793	down
TraesCS1A01G386900	96	208	4.87553	10.5018	0.000232159	1.10358	up
TraesCS1A01G396800	109	18	6.02238	1.02845	5e-11	-2.50327	down
TraesCS1A01G407200	87	182	3.55139	7.37582	0.00129922	1.05214	up
TraesCS1A01G411200	121	40	4.59644	1.47674	1.02e-05	-1.56189	down
TraesCS1A01G414500	363	179	12.4601	6.53559	6.14e-05	-1.01397	down
TraesCS1A01G416200	283	122	6.26283	2.7084	3.28e-06	-1.204	down
TraesCS1A01G416500	20	61	0.373207	1.15706	0.00651322	1.54008	up
TraesCS1A01G423100	302	56	2.65546	0.591324	0	-2.40032	down
TraesCS1A01G424100	1086	133	30.2641	3.78202	0	-3.01546	down
TraesCS1A01G429100	57	4	0.416469	0.0369379	5.07e-09	-3.41395	down
TraesCS1A01G444900	210	99	9.0396	4.37579	0.000381489	-1.07356	down
TraesCS1B01G003400	238	519	1.97682	3.33861	5.44e-07	1.11991	up
TraesCS1B01G004000	87	183	0.549248	1.15079	0.00110358	1.05998	up
TraesCS1B01G019800	700	189	25.54	7.04433	0	-1.88072	down
TraesCS1B01G022000	58	10	0.494099	0.0857686	8.62e-06	-2.37254	down
TraesCS1B01G034500	151	70	0.730495	0.321537	0.00205893	-1.09293	down
TraesCS1B01G044400	63	131	0.518616	1.15391	0.00993254	1.03877	up
TraesCS1B01G047000	142	57	2.07439	0.843176	0.000140311	-1.29473	down
TraesCS1B01G048500	363	138	4.70828	1.8062	3.36e-09	-1.38573	down
TraesCS1B01G056900	1152	91	21.8636	1.78689	0	-3.6406	down
TraesCS1B01G062000	92	7	1.69124	0.137576	4.23e-14	-3.46139	down
TraesCS1B01G062300	63	16	0.770009	0.195206	0.000232466	-1.88271	down
TraesCS1B01G067800	39	180	0.637301	2.89862	4.44e-13	2.16433	up
TraesCS1B01G084700	155	45	2.90069	0.858425	2.06e-08	-1.75114	down
TraesCS1B01G085100	959	371	19.4587	6.14953	2.11e-12	-1.36658	down
TraesCS1B01G089000	206	73	6.44103	2.3029	1.34e-07	-1.47796	down
TraesCS1B01G090800	185	44	4.52475	1.128	3.92e-12	-2.03554	down
TraesCS1B01G093400	493	209	7.90543	3.38883	2.53e-08	-1.2322	down
TraesCS1B01G096600	63	15	2.97009	0.741321	0.000107174	-1.96766	down
TraesCS1B01G104700	38	3	0.720601	0.0720583	1.9e-05	-3.13746	down
TraesCS1B01G107600	83	31	1.25747	0.453207	0.00310762	-1.37886	down
TraesCS1B01G109700	328	0	4.43432	0	0	-7.79135	down
TraesCS1B01G111200	494	226	9.96593	4.64572	6.55e-07	-1.12306	down
TraesCS1B01G134500	141	0	0.961597	0.00417162	0	-6.58196	down
TraesCS1B01G135700	571	253	25.1497	11.1148	6.89e-08	-1.16965	down
TraesCS1B01G135800	1454	2	1229.13	0.300172	0	-8.70516	down
TraesCS1B01G137200	401	100	32.3105	8.22568	0	-1.98764	down
TraesCS1B01G141100	183	448	2.79986	10.2353	1.04e-08	1.28476	up
TraesCS1B01G158000	413	104	22.0825	5.73543	0	-1.97426	down
TraesCS1B01G159800	729	266	23.4611	10.219	5.73e-13	-1.44939	down
TraesCS1B01G162300	87	25	1.16921	0.333849	3.34e-05	-1.74017	down
TraesCS1B01G168500	52	0	0.715296	0	1.05e-11	-5.1684	down
TraesCS1B01G182300	94	21	2.08837	0.483006	1.75e-07	-2.0862	down
TraesCS1B01G186600	312	93	16.6375	5.04591	9.94e-13	-1.73021	down
TraesCS1B01G196200	108	17	2.09284	0.313777	2.57e-11	-2.56615	down
TraesCS1B01G197000	205	79	9.05914	3.55653	1.7e-06	-1.35922	down
TraesCS1B01G199600	4705	1252	158.107	44.4328	0	-1.9087	down
TraesCS1B01G203300	122	5	1.1091	0.052928	0	-4.25059	down
TraesCS1B01G204900	259	40	4.21465	0.662605	0	-2.65047	down
TraesCS1B01G222000	101	1	0.759729	0.00939616	0	-5.3647	down
TraesCS1B01G223300	514	222	13.5506	5.9894	4.3e-08	-1.20574	down
TraesCS1B01G224300	102	35	2.31792	0.837129	0.000126105	-1.50399	down
TraesCS1B01G225700	102	8	4.11002	0.317444	2.55e-15	-3.44731	down
TraesCS1B01G231500	169	412	3.73644	10.2593	2.46e-08	1.27818	up
TraesCS1B01G232700	36	5	1.55754	0.250109	0.000810201	-2.53071	down
TraesCS1B01G237700	253	105	6.78743	2.72371	2.37e-06	-1.25691	down
TraesCS1B01G242700	167	47	5.89323	1.68454	2.93e-09	-1.79696	down
TraesCS1B01G249000	15196	5024	618.669	203.811	0	-1.5965	down
TraesCS1B01G249200	141	46	2.02831	0.56154	1.29e-06	-1.58522	down
TraesCS1B01G249400	183	0	1.7179	0	0	-6.95465	down
TraesCS1B01G267900	122	3	2.92736	0.0700936	0	-4.78236	down
TraesCS1B01G269100	124	24	7.84948	1.52623	7.32e-11	-2.29969	down
TraesCS1B01G270300	729	256	10.6566	3.80883	6.39e-14	-1.50436	down
TraesCS1B01G274300	365	115	10.1645	3.18037	1.01e-12	-1.65359	down
TraesCS1B01G274500	158	5	5.69218	0.185036	0	-4.61967	down
TraesCS1B01G275000	325	125	10.1351	4.47936	1.61e-08	-1.36803	down
TraesCS1B01G276500	728	214	1095.07	295.314	0	-1.75928	down
TraesCS1B01G276800	1926	573	188.909	56.5956	0	-1.74637	down
TraesCS1B01G276900	1427	333	2044.81	430.872	0	-2.09446	down
TraesCS1B01G277500	201	49	2.35527	0.559124	1.64e-12	-2.00384	down
TraesCS1B01G281100	122	30	2.90993	0.729728	1.67e-08	-1.97152	down
TraesCS1B01G283600	600	248	14.1143	5.92127	1.9e-09	-1.26957	down
TraesCS1B01G285900	191	87	5.43759	2.54	0.000292696	-1.12122	down
TraesCS1B01G288200	104	31	2.1713	0.671503	7.64e-06	-1.69912	down
TraesCS1B01G290000	276	117	6.31145	2.43102	2.29e-06	-1.22769	down
TraesCS1B01G292400	235	58	6.49033	0.804075	1.13e-13	-1.99111	down
TraesCS1B01G298800	3	43	0.715846	8.58293	1.33e-06	3.30946	up
TraesCS1B01G303200	77	20	2.15498	0.579211	3.04e-05	-1.86897	down
TraesCS1B01G304800	5906	2925	833.341	411.061	1.71e-07	-1.01337	down
TraesCS1B01G308900	7488	3104	131.684	55.2222	1.13e-12	-1.27005	down
TraesCS1B01G309100	65	10	4.17478	0.661612	4.24e-07	-2.53304	down
TraesCS1B01G310300	44	0	3.01789	0	1.09e-09	-4.93466	down
TraesCS1B01G313400	102	25	3.88449	1.13295	2.58e-07	-1.96608	down
TraesCS1B01G330100	62	158	0.441485	1.12746	3.25e-05	1.3289	up
TraesCS1B01G331700	110	46	5.75276	2.46227	0.00234641	-1.23127	down
TraesCS1B01G333300	1244	606	14.6377	7.23148	2.68e-07	-1.03578	down
TraesCS1B01G336600	165	57	1.69223	0.608592	8.43e-07	-1.50922	down
TraesCS1B01G343700	371	134	20.8037	7.47861	3.15e-10	-1.45903	down
TraesCS1B01G356600	452	145	7.05507	2.28217	1.21e-13	-1.63029	down
TraesCS1B01G360900	44	3	1.63208	0.120079	7.82e-07	-3.34153	down
TraesCS1B01G361300	167	75	5.6692	2.62882	0.000521518	-1.13935	down
TraesCS1B01G362100	74	16	1.97682	0.373337	3.86e-06	-2.10992	down
TraesCS1B01G364200	909	343	50.5944	16.2959	6.93e-13	-1.40219	down
TraesCS1B01G368300	79	191	4.78889	11.7945	2.36e-05	1.25793	up
TraesCS1B01G377500	456	196	2.53395	1.05879	8.03e-08	-1.21197	down
TraesCS1B01G385000	150	33	4.32282	0.981268	2.96e-11	-2.13506	down
TraesCS1B01G385100	65	9	2.09039	0.309582	1.34e-07	-2.66443	down
TraesCS1B01G388700	54585	25016	673.855	312.847	7.25e-09	-1.12561	down
TraesCS1B01G394900	62	12	1.2698	0.26741	1.17e-05	-2.23486	down
TraesCS1B01G395100	305	136	2.43997	1.08671	5.84e-06	-1.15653	down
TraesCS1B01G397200	38	6	3.82773	0.678187	0.00096673	-2.39887	down
TraesCS1B01G410800	1451	664	26.9051	12.2189	6.04e-09	-1.12604	down
TraesCS1B01G415600	3	35	0.0260658	0.221666	9.4e-05	3.02347	up
TraesCS1B01G424700	120	19	1.38336	0.223129	2.47e-12	-2.568	down
TraesCS1B01G436500	114	41	14.8702	5.35747	0.000103483	-1.44263	down
TraesCS1B01G440500	23	74	0.482851	1.51785	0.000602302	1.6242	up
TraesCS1B01G444700	106	42	4.51726	1.81019	0.001186	-1.3055	down
TraesCS1B01G446500	621	105	13.581	2.3185	0	-2.54736	down
TraesCS1B01G454200	401	196	7.77965	3.74279	2.69e-05	-1.02718	down
TraesCS1B01G455100	334	162	7.05439	3.36828	5.52e-05	-1.03708	down
TraesCS1B01G455200	398	125	4.39367	1.49374	2.55e-13	-1.65916	down
TraesCS1B01G456900	665	59	18.2125	1.66407	0	-3.46187	down
TraesCS1B01G472000	51	0	0.948345	1.39e-05	1.86e-11	-5.14117	down
TraesCS1B01G481300	1297	388	36.3024	8.05107	0	-1.73718	down
TraesCS1D01G000600	17	59	0.155356	0.523439	0.00197798	1.7101	up
TraesCS1D01G002700	968	2004	5.17187	10.7654	6.59e-08	1.04866	up
TraesCS1D01G017600	425	174	3.57981	1.4739	1.76e-08	-1.28114	down
TraesCS1D01G018100	131	346	3.7896	10.1113	4.63e-09	1.39111	up
TraesCS1D01G020600	560	171	42.2172	13.0427	4.44e-16	-1.70276	down
TraesCS1D01G025000	13	56	1.32111	5.64096	0.000311244	1.98845	up
TraesCS1D01G036900	1085	347	66.9925	22.1129	0	-1.64049	down
TraesCS1D01G037000	114	39	7.85243	2.77259	3.88e-05	-1.51219	down
TraesCS1D01G038000	57	10	0.953638	0.16806	1.32e-05	-2.34808	down
TraesCS1D01G043200	119	29	4.70199	1.19924	2.06e-08	-1.9826	down
TraesCS1D01G044300	553	60	10.699	1.19543	0	-3.17279	down
TraesCS1D01G044400	71	5	5.00786	0.415965	2.72e-11	-3.48203	down
TraesCS1D01G050000	1161	579	150.405	75.379	1.04e-06	-1.00188	down
TraesCS1D01G052500	638	172	11.7719	3.24013	0	-1.88209	down
TraesCS1D01G071800	510	129	6.04846	1.65608	0	-1.97079	down
TraesCS1D01G072700	66	17	3.36761	0.886491	0.000164745	-1.86808	down
TraesCS1D01G073000	202	78	6.09467	2.47229	2.09e-06	-1.35614	down
TraesCS1D01G080800	103	44	4.62453	2.045	0.0053594	-1.19979	down
TraesCS1D01G084200	187	384	4.43805	9.29801	2.96e-05	1.03222	up
TraesCS1D01G089900	1018	303	29.8732	9.13083	0	-1.74339	down
TraesCS1D01G094700	102	35	8.53014	2.97697	0.000126105	-1.50399	down
TraesCS1D01G094900	143	34	9.85471	2.38417	5.04e-10	-2.02557	down
TraesCS1D01G095400	225	60	16.1715	4.37329	3.78e-12	-1.88107	down
TraesCS1D01G117100	278	98	12.4048	3.96753	3.35e-09	-1.4902	down
TraesCS1D01G118500	1811	482	302.37	80.741	0	-1.90642	down
TraesCS1D01G120100	136	28	3.81004	0.822458	4.3e-11	-2.22113	down
TraesCS1D01G122700	146	336	1.94014	7.57841	1.16e-06	1.19424	up
TraesCS1D01G125900	83	31	0.557483	0.217076	0.00310762	-1.37886	down
TraesCS1D01G134200	93	16	1.25034	0.201467	2.75e-09	-2.43381	down
TraesCS1D01G140500	487	52	25.9889	2.86665	0	-3.19105	down
TraesCS1D01G141000	794	361	27.643	12.0065	4e-08	-1.13391	down
TraesCS1D01G142100	722	355	14.1635	7.04644	2.36e-06	-1.02112	down
TraesCS1D01G147700	130	13	1.6858	0.183236	0	-3.18206	down
TraesCS1D01G147800	287	48	3.70071	0.629861	0	-2.54338	down
TraesCS1D01G154900	2277	980	56.4345	24.5846	4.8e-11	-1.21503	down
TraesCS1D01G156900	50	14	0.630757	0.184757	0.00640297	-1.73313	down
TraesCS1D01G162400	210	78	1.82114	0.779862	4.48e-07	-1.41177	down
TraesCS1D01G163800	8767	3620	164.364	68.9557	8.49e-13	-1.27575	down
TraesCS1D01G168400	69	9	3.64458	0.494545	2.27e-08	-2.74872	down
TraesCS1D01G175100	228	95	3.75775	1.74123	6.49e-06	-1.25	down
TraesCS1D01G184500	3585	766	155.874	34.7717	0	-2.22436	down
TraesCS1D01G186100	470	164	10.5717	3.70792	4.59e-12	-1.5105	down
TraesCS1D01G187100	81	27	3.75955	1.3128	0.000704212	-1.53385	down
TraesCS1D01G187900	76	27	1.6396	0.653186	0.00305751	-1.44364	down
TraesCS1D01G190200	214	54	13.904	3.4836	1.5e-12	-1.95737	down
TraesCS1D01G202300	835	330	13.119	4.97907	1.82e-11	-1.33539	down
TraesCS1D01G206700	49	10	2.5219	0.528159	0.000393731	-2.13588	down
TraesCS1D01G213700	236	66	3.26778	0.922772	8.52e-12	-1.81516	down
TraesCS1D01G214300	165	426	3.67299	9.63463	1.57e-09	1.36047	up
TraesCS1D01G215100	38	3	2.21049	0.189053	1.9e-05	-3.13746	down
TraesCS1D01G215500	75	7	2.68716	0.288275	9.92e-11	-3.17184	down
TraesCS1D01G229700	940	383	15.794	6.60911	4.88e-11	-1.29201	down
TraesCS1D01G230000	736	352	20.3021	10.0763	6.25e-07	-1.06096	down
TraesCS1D01G232700	40	8	0.850534	0.184418	0.00292	-2.1286	down
TraesCS1D01G236100	168	68	5.64413	2.25259	4.04e-05	-1.28636	down
TraesCS1D01G237100	42	0	1.14402	7.1e-05	3.54e-09	-4.86979	down
TraesCS1D01G237500	14238	3661	604.99	154.374	0	-1.959	down
TraesCS1D01G239700	193	94	3.40591	1.70634	0.00143993	-1.02629	down
TraesCS1D01G244700	156	62	4.53876	1.8649	4.95e-05	-1.3107	down
TraesCS1D01G248200	104	12	9.89077	1.19314	3.54e-13	-2.96739	down
TraesCS1D01G249600	179	55	9.47242	2.97764	1.22e-08	-1.6759	down
TraesCS1D01G263800	674	167	15.2455	4.17758	0	-2.00329	down
TraesCS1D01G264500	311	81	9.09363	2.11783	3.77e-15	-1.92155	down
TraesCS1D01G265800	21049	6900	3427.25	1119.03	0	-1.60887	down
TraesCS1D01G265900	318	58	52.1536	9.35408	0	-2.4251	down
TraesCS1D01G266000	3645	795	553.471	120.037	0	-2.19478	down
TraesCS1D01G266100	2038	324	155.212	24.8349	0	-2.64753	down
TraesCS1D01G266700	109	18	1.45711	0.243423	5e-11	-2.50327	down
TraesCS1D01G268600	691	279	14.0184	5.7698	2.15e-10	-1.30385	down
TraesCS1D01G275000	184	88	1.12421	0.550578	0.00123127	-1.05157	down
TraesCS1D01G276500	40	9	0.862039	0.190095	0.00705874	-1.98402	down
TraesCS1D01G278100	568	266	14.4162	6.92954	8.17e-07	-1.09019	down
TraesCS1D01G283500	81	15	3.58445	0.711322	1.06e-07	-2.32281	down
TraesCS1D01G292100	3991	1349	85.3772	29.0845	0	-1.56381	down
TraesCS1D01G296500	7111	2746	1045.94	402.472	5e-15	-1.37224	down
TraesCS1D01G299700	40	3	2.93188	0.234223	6.55e-06	-3.20874	down
TraesCS1D01G302500	465	69	9.52535	1.45364	0	-2.7264	down
TraesCS1D01G308200	260	128	8.32617	4.39371	0.000353332	-1.01393	down
TraesCS1D01G316600	42	2	0.32318	0.0153055	3.81e-07	-3.6404	down
TraesCS1D01G319200	91	37	4.97653	2.08772	0.00567496	-1.26487	down
TraesCS1D01G320800	579	128	6.43306	1.44894	0	-2.16445	down
TraesCS1D01G324700	36	88	0.224273	0.543904	0.0078588	1.25528	up
TraesCS1D01G332000	187	13	7.3618	0.526824	0	-3.7016	down
TraesCS1D01G341700	112	16	6.82603	0.988755	1.9e-12	-2.69815	down
TraesCS1D01G345500	62	9	10.8733	1.55747	5.04e-07	-2.59782	down
TraesCS1D01G352600	712	253	18.7607	6.78793	1.58e-13	-1.48729	down
TraesCS1D01G363800	53	122	2.7507	6.38253	0.00228055	1.18037	up
TraesCS1D01G367000	851	391	34.904	16.2908	4.94e-08	-1.11903	down
TraesCS1D01G370300	134	55	3.86416	1.64881	0.000365272	-1.26216	down
TraesCS1D01G375600	60400	28876	720.967	347.769	1.43e-07	-1.06464	down
TraesCS1D01G378900	646	282	19.5936	8.78335	1.64e-08	-1.19157	down
TraesCS1D01G379900	139	41	2.22583	0.684363	1.43e-07	-1.72534	down
TraesCS1D01G400000	532	199	13.5219	5.21995	3.82e-11	-1.41194	down
TraesCS1D01G403100	145	48	3.75378	1.26507	1.31e-06	-1.56564	down
TraesCS1D01G422000	88	29	11.49	3.90514	0.000269176	-1.55347	down
TraesCS1D01G423800	1016	458	22.3796	10.0592	8.83e-09	-1.14691	down
TraesCS1D01G429200	191	59	4.18736	1.31923	5.7e-09	-1.67006	down
TraesCS1D01G439400	28	95	0.530649	1.8114	1.83e-05	1.71024	up
TraesCS1D01G453900	129	41	0.663236	0.24004	2.08e-06	-1.61881	down
TraesCS2A01G000400	167	68	3.40578	1.59369	4.93e-05	-1.27782	down
TraesCS2A01G009500	1278	582	45.2758	21.0024	6.72e-09	-1.13279	down
TraesCS2A01G012500	215	76	3.27072	0.980554	7.58e-08	-1.48225	down
TraesCS2A01G019900	87	20	1.14847	0.267548	9.18e-07	-2.04198	down
TraesCS2A01G026800	1597	575	63.404	23.3905	9.99e-16	-1.47135	down
TraesCS2A01G027300	165	72	3.28717	1.3827	0.000289169	-1.17984	down
TraesCS2A01G027400	330	89	6.25539	1.71248	5.55e-15	-1.87317	down
TraesCS2A01G029700	0	46	7.63e-05	0.455732	3.37e-10	4.99674	up
TraesCS2A01G035900	57	13	1.65076	0.404857	0.000210581	-2.01333	down
TraesCS2A01G038300	110	38	1.94045	0.590398	6.75e-05	-1.49742	down
TraesCS2A01G045400	100	13	7.42508	1.05231	6.31e-12	-2.80844	down
TraesCS2A01G073800	223	74	1.49879	0.50306	6.47e-09	-1.57233	down
TraesCS2A01G075400	553	193	17.0368	6.04989	7.63e-13	-1.51148	down
TraesCS2A01G091900	69	25	1.83556	0.693277	0.00840215	-1.41206	down
TraesCS2A01G094000	2077	858	11.9456	4.84468	4.08e-12	-1.27399	down
TraesCS2A01G095200	143	68	3.09432	1.51308	0.00484918	-1.05612	down
TraesCS2A01G101900	1793	743	75.9209	32.5004	7.75e-12	-1.26925	down
TraesCS2A01G102000	4734	2149	130.649	59.934	7.02e-10	-1.13885	down
TraesCS2A01G102300	536	185	6.358	2.12629	6.04e-13	-1.52715	down
TraesCS2A01G102800	38	5	1.14484	0.162665	0.000304183	-2.60569	down
TraesCS2A01G104600	37	146	0.466982	1.87163	1.69e-09	1.93814	up
TraesCS2A01G104900	45	11	1.79459	0.468252	0.00471374	-1.89637	down
TraesCS2A01G107600	43	4	1.99422	0.226938	6.41e-06	-3.01922	down
TraesCS2A01G121000	5162	2252	60.4035	27.0345	4.68e-11	-1.19619	down
TraesCS2A01G134000	212	87	1.34272	0.560744	7.74e-06	-1.27061	down
TraesCS2A01G137700	1123	2371	13.1162	30.4071	1.68e-08	1.07713	up
TraesCS2A01G153300	16	57	0.676555	2.41169	0.00203543	1.74181	up
TraesCS2A01G157400	2690	965	121.562	44.3008	0	-1.47758	down
TraesCS2A01G167400	95	233	4.02144	9.99774	2.78e-06	1.2811	up
TraesCS2A01G171000	203	96	8.79294	4.4139	0.000511381	-1.06872	down
TraesCS2A01G176000	184	56	1.25907	0.391946	6.26e-09	-1.69	down
TraesCS2A01G182400	163	73	1.71187	0.784198	0.000578214	-1.14291	down
TraesCS2A01G184600	63	146	0.423975	0.982471	0.000552245	1.1935	up
TraesCS2A01G187400	52	9	2.31932	0.431921	4.11e-05	-2.35055	down
TraesCS2A01G190200	1826	381	84.003	17.6678	0	-2.25638	down
TraesCS2A01G194900	43	5	1.35382	0.171983	2.59e-05	-2.7777	down
TraesCS2A01G199600	60	1	3.17875	0.0576429	2.04e-12	-4.62762	down
TraesCS2A01G204900	55	0	1.81187	0.0177607	1.89e-12	-5.24713	down
TraesCS2A01G211300	349	172	3.89903	1.95065	7.4e-05	-1.01453	down
TraesCS2A01G211900	686	183	8.28548	2.37549	0	-1.89781	down
TraesCS2A01G214000	179	86	2.87108	1.40743	0.00161525	-1.04475	down
TraesCS2A01G215100	133	34	1.78745	0.366567	9.74e-09	-1.92209	down
TraesCS2A01G217200	558	186	7.11902	2.41412	6.1e-14	-1.57731	down
TraesCS2A01G218700	115	44	10.1065	4.01436	0.000316979	-1.35664	down
TraesCS2A01G219100	933	312	18.7136	6.59003	3.33e-16	-1.57577	down
TraesCS2A01G225300	252	0	18.6549	0.0123259	0	-7.41304	down
TraesCS2A01G262800	116	39	3.20087	1.09928	2.28e-05	-1.53696	down
TraesCS2A01G268400	1268	627	14.8701	7.03347	5.51e-07	-1.01429	down
TraesCS2A01G269600	59	6	1.38328	0.163893	4.25e-08	-3.01411	down
TraesCS2A01G288000	122	40	3.2396	1.03077	7.82e-06	-1.57362	down
TraesCS2A01G291000	37	113	0.671885	1.74894	1.79e-05	1.57273	up
TraesCS2A01G295400	3705	971	55.656	15.3853	0	-1.9303	down
TraesCS2A01G304000	108	46	3.47584	1.52581	0.00369077	-1.20515	down
TraesCS2A01G309700	135	64	3.81615	0.991345	0.00638492	-1.05948	down
TraesCS2A01G316500	141	52	4.86057	1.86502	2.23e-05	-1.41356	down
TraesCS2A01G319200	200	26	4.58044	0.623542	0	-2.87385	down
TraesCS2A01G325100	199	60	5.66802	1.76105	1.51e-09	-1.70515	down
TraesCS2A01G338300	104	31	3.27953	1.0292	7.64e-06	-1.69912	down
TraesCS2A01G338800	59	14	1.7515	0.484787	0.000219877	-1.96554	down
TraesCS2A01G342600	58	15	2.92882	0.687768	0.0006933	-1.85122	down
TraesCS2A01G343900	1669	789	44.9655	21.5565	2.7e-08	-1.07945	down
TraesCS2A01G345500	139	20	3.61712	0.555052	7.88e-15	-2.70888	down
TraesCS2A01G348800	1173	363	38.1478	11.8112	0	-1.68809	down
TraesCS2A01G357000	17	63	0.30449	0.984204	0.000482617	1.80248	up
TraesCS2A01G365800	276	77	8.63674	1.90254	5.33e-13	-1.82189	down
TraesCS2A01G367700	832	348	42.2236	17.5024	4.22e-10	-1.25392	down
TraesCS2A01G368700	618	262	8.62566	3.69783	5.32e-09	-1.23334	down
TraesCS2A01G372200	53	117	0.626331	1.74786	0.00648303	1.12074	up
TraesCS2A01G375100	38	2	2.64847	0.18717	3.48e-06	-3.50119	down
TraesCS2A01G378100	71	22	2.12372	0.687156	0.000857332	-1.62585	down
TraesCS2A01G381600	76	10	5.24871	0.670244	3.65e-09	-2.75392	down
TraesCS2A01G384300	157	13	2.75732	0.237226	0	-3.4515	down
TraesCS2A01G389200	2200	412	24.0328	4.63127	0	-2.41256	down
TraesCS2A01G389900	1931	930	35.2081	17.1026	5.91e-08	-1.05285	down
TraesCS2A01G394900	736	200	44.1291	12.4413	0	-1.87193	down
TraesCS2A01G397900	19	66	0.525072	1.61017	0.000668524	1.71988	up
TraesCS2A01G398800	305	95	7.46469	2.39271	8.43e-12	-1.66742	down
TraesCS2A01G400100	523	111	15.6336	3.46591	0	-2.22115	down
TraesCS2A01G407700	223	475	10.5559	22.7048	2.35e-06	1.0858	up
TraesCS2A01G409400	960	329	10.5778	3.40843	1.11e-15	-1.54067	down
TraesCS2A01G410000	111	49	3.46906	1.58044	0.0057351	-1.15577	down
TraesCS2A01G411200	696	231	12.0575	4.30475	3.77e-15	-1.58501	down
TraesCS2A01G420700	179	83	6.2564	2.9258	0.000698221	-1.09509	down
TraesCS2A01G425700	43	104	0.273154	0.660429	0.00288115	1.2456	up
TraesCS2A01G427700	102	237	10.1991	24.2409	1.25e-05	1.20446	up
TraesCS2A01G430600	220	103	5.5967	2.67534	0.000236221	-1.0839	down
TraesCS2A01G438200	510	242	19.4808	8.67866	2.47e-06	-1.07085	down
TraesCS2A01G443600	464	173	12.0426	4.58163	1.23e-10	-1.41562	down
TraesCS2A01G444000	640	126	15.1408	3.15718	0	-2.33107	down
TraesCS2A01G447800	548	256	12.9207	6.0955	8.86e-07	-1.09358	down
TraesCS2A01G448300	1435	637	59.6284	26.2889	1.08e-09	-1.16982	down
TraesCS2A01G453300	1022	306	29.6536	9.15032	0	-1.73489	down
TraesCS2A01G453700	199	37	10.0959	1.87945	3.33e-16	-2.38106	down
TraesCS2A01G454000	280	91	46.1246	14.9329	1.49e-10	-1.60574	down
TraesCS2A01G454700	203	62	11.3274	3.47039	1.68e-09	-1.68747	down
TraesCS2A01G461300	7519	2536	189.822	37.2176	0	-1.56743	down
TraesCS2A01G461800	1361	342	14.1826	3.66631	0	-1.98791	down
TraesCS2A01G461900	212	57	6.09558	1.70616	1.43e-11	-1.86795	down
TraesCS2A01G462500	107	33	5.45521	1.73353	1.04e-05	-1.65339	down
TraesCS2A01G468500	1401	440	30.5745	9.83028	0	-1.66754	down
TraesCS2A01G469900	1934	562	20.3965	5.77767	0	-1.78024	down
TraesCS2A01G482200	170	16	6.88693	0.671129	0	-3.29372	down
TraesCS2A01G484200	38	135	0.539842	1.8824	7.22e-08	1.78931	up
TraesCS2A01G488900	7625	2390	143.1	45.7577	0	-1.67311	down
TraesCS2A01G492500	98	11	2.42208	0.288797	1.13e-12	-2.99405	down
TraesCS2A01G499700	118	48	4.98046	2.06956	0.000831483	-1.27173	down
TraesCS2A01G501900	494	1119	9.25729	21.1377	1.92e-09	1.17721	up
TraesCS2A01G504800	105	21	58.1341	11.2272	3.67e-09	-2.2435	down
TraesCS2A01G505500	78	24	3.08705	0.956649	0.000310825	-1.64094	down
TraesCS2A01G507300	988	422	37.5882	15.245	5.31e-10	-1.22436	down
TraesCS2A01G512100	31115	14121	555.42	255.426	1.96e-09	-1.13969	down
TraesCS2A01G513900	182	6	13.2324	0.478081	0	-4.61508	down
TraesCS2A01G514300	749	317	58.0441	25.1868	1.46e-09	-1.23659	down
TraesCS2A01G521400	83	29	0.604583	0.214983	0.00114697	-1.47053	down
TraesCS2A01G523000	40	0	0.56571	2.17e-05	1.16e-08	-4.80187	down
TraesCS2A01G525500	9406	4389	140.241	67.455	4.82e-09	-1.09943	down
TraesCS2A01G534600	126	36	3.28534	0.986842	2.69e-07	-1.76588	down
TraesCS2A01G542700	81	165	9.49893	19.7924	0.00417369	1.01317	up
TraesCS2A01G546300	45	1	1.46404	0.0530614	8.5e-09	-4.22417	down
TraesCS2A01G546400	45	9	1.43033	0.290426	0.000852821	-2.14819	down
TraesCS2A01G562200	11	49	0.457063	1.88473	0.000949348	2.01546	up
TraesCS2A01G564300	46	107	0.580614	1.33118	0.00461916	1.19191	up
TraesCS2A01G571500	79	23	3.91682	1.1947	0.000120712	-1.71673	down
TraesCS2A01G571800	118	46	2.74131	1.08296	0.000365427	-1.33124	down
TraesCS2A01G573500	42	4	2.29277	0.268515	1.07e-05	-2.98642	down
TraesCS2A01G573900	1864	915	96.5744	48.937	1.8e-07	-1.02537	down
TraesCS2A01G577800	112	22	3.32787	0.67925	7.63e-10	-2.27258	down
TraesCS2A01G583100	226	104	8.68074	4.16561	0.000123233	-1.10872	down
TraesCS2A01G586500	3952	1245	283.197	91.0456	0	-1.66526	down
TraesCS2A01G588300	189	80	3.42234	1.46659	4.75e-05	-1.22505	down
TraesCS2A01G591000	69	20	4.49086	1.34385	0.000467898	-1.71388	down
TraesCS2B01G001600	38	104	0.272426	0.737311	0.000326103	1.41761	up
TraesCS2B01G023500	314	97	18.776	6.01484	3.92e-12	-1.67957	down
TraesCS2B01G040500	10614	5220	286.696	142.835	1.51e-07	-1.02364	down
TraesCS2B01G040700	102	38	1.12366	0.444217	0.000546917	-1.38999	down
TraesCS2B01G041700	482	231	10.5973	5.12722	4.94e-06	-1.05633	down
TraesCS2B01G042400	139	47	3.61928	1.23631	3.52e-06	-1.53476	down
TraesCS2B01G045700	281	131	1.84511	0.864974	4.33e-05	-1.09233	down
TraesCS2B01G046500	643	270	6.84282	3.00194	2.56e-09	-1.24727	down
TraesCS2B01G058000	207	62	3.86841	1.17963	6.82e-10	-1.71542	down
TraesCS2B01G058300	109	224	3.72596	7.99021	0.000596411	1.02917	up
TraesCS2B01G077200	139	41	4.50071	1.33324	1.43e-07	-1.72534	down
TraesCS2B01G079300	47	12	2.45546	0.664041	0.00466077	-1.846	down
TraesCS2B01G079400	134	48	16.3151	5.7774	1.93e-05	-1.45303	down
TraesCS2B01G079500	92	24	9.38409	2.48958	3.37e-06	-1.87499	down
TraesCS2B01G081000	55	13	1.51969	0.385947	0.000459352	-1.96314	down
TraesCS2B01G083700	6	56	0.206467	1.85934	1.79e-07	2.94072	up
TraesCS2B01G083800	163	330	5.77845	11.7232	0.000106963	1.01098	up
TraesCS2B01G091500	148	57	3.35217	1.31614	3.8e-05	-1.35383	down
TraesCS2B01G101200	94	7	1.04848	0.0808074	1.72e-14	-3.49193	down
TraesCS2B01G110300	151	25	3.01549	0.523968	2.19e-14	-2.52531	down
TraesCS2B01G114000	77	29	0.626912	0.331569	0.00620148	-1.36425	down
TraesCS2B01G119000	964	279	40.1406	11.9755	0	-1.78332	down
TraesCS2B01G119300	64	137	1.17709	2.48713	0.00439368	1.08047	up
TraesCS2B01G123100	50	0	3.1644	0	3.31e-11	-5.11342	down
TraesCS2B01G123400	60	19	6.0561	1.96262	0.00500148	-1.58556	down
TraesCS2B01G124100	205	0	7.14934	0	0	-7.11718	down
TraesCS2B01G124300	304	2	9.61748	0.0630325	0	-6.45284	down
TraesCS2B01G124600	1673	634	76.2798	29.4919	2.6e-14	-1.39778	down
TraesCS2B01G125200	1535	580	46.4106	21.3777	3.19e-14	-1.40182	down
TraesCS2B01G125800	1499	534	60.6901	24.5218	5.55e-16	-1.48651	down
TraesCS2B01G126500	103	0	8.25466	0	0	-6.13445	down
TraesCS2B01G127500	88	0	1.87302	0	0	-5.91088	down
TraesCS2B01G129300	43	10	11.8917	2.83099	0.00471434	-1.95335	down
TraesCS2B01G129600	2037	396	47.8007	10.9443	0	-2.35852	down
TraesCS2B01G130300	4803	2005	842.244	353.415	2.18e-12	-1.25971	down
TraesCS2B01G131200	203	6	21.5371	0.522562	0	-4.77142	down
TraesCS2B01G131400	55	141	4.58248	11.708	7.89e-05	1.33483	up
TraesCS2B01G132900	3381	1209	27.36	11.1274	0	-1.4825	down
TraesCS2B01G133200	743	151	35.9008	7.67032	0	-2.28756	down
TraesCS2B01G133500	1600	15	114.34	1.13907	0	-6.60191	down
TraesCS2B01G135800	920	305	3.04016	1.28786	2.22e-16	-1.58814	down
TraesCS2B01G135900	1608	732	18.4203	8.54827	3.4e-09	-1.13376	down
TraesCS2B01G137100	451	134	4.41417	1.32205	2.78e-15	-1.73972	down
TraesCS2B01G137300	961	422	12.7192	6.9168	2.75e-09	-1.18445	down
TraesCS2B01G137500	52	1	1.1978	0.0248244	1.67e-10	-4.42652	down
TraesCS2B01G137700	767	0	28.1746	1.16e-05	0	-9.01315	down
TraesCS2B01G138200	41	0	0.359767	0	6.41e-09	-4.83623	down
TraesCS2B01G139000	280	88	4.69784	1.49038	4.17e-11	-1.65331	down
TraesCS2B01G139200	628	155	9.00639	2.26596	0	-2.00813	down
TraesCS2B01G140300	220	6	6.58744	0.272632	0	-4.88663	down
TraesCS2B01G141700	51	0	1.40293	0	1.86e-11	-5.14117	down
TraesCS2B01G141900	2155	398	28.8505	5.87287	0	-2.43246	down
TraesCS2B01G144900	100	0	1.00763	0	0	-6.09243	down
TraesCS2B01G145100	412	0	15.3234	0	0	-8.11897	down
TraesCS2B01G145700	408	120	2.68416	0.899157	7.77e-15	-1.75301	down
TraesCS2B01G145800	153	4	2.27779	0.0852858	0	-4.81524	down
TraesCS2B01G146200	675	2	27.1444	0.111299	0	-7.59979	down
TraesCS2B01G147000	129	0	3.41585	0	0	-6.45504	down
TraesCS2B01G147600	255	121	3.24272	2.204	0.000136291	-1.06626	down
TraesCS2B01G148200	606	133	17.8993	3.8227	0	-2.17538	down
TraesCS2B01G148600	511	130	9.33229	2.32445	0	-1.96259	down
TraesCS2B01G148900	129	10	2.7574	0.215692	0	-3.50579	down
TraesCS2B01G149000	337	27	3.19398	0.271981	0	-3.57071	down
TraesCS2B01G149500	36	4	0.736632	0.0846538	0.000230739	-2.77223	down
TraesCS2B01G149600	166	0	1.21861	0	0	-6.81518	down
TraesCS2B01G150500	683	218	2.30236	0.734113	4.44e-16	-1.64089	down
TraesCS2B01G150800	80	18	1.54427	0.451692	2.24e-06	-2.06404	down
TraesCS2B01G151200	176	85	9.15864	4.39277	0.00201157	-1.03716	down
TraesCS2B01G152700	275	100	2.48491	0.921337	1.17e-08	-1.44591	down
TraesCS2B01G154200	340	86	3.17322	0.801243	2.22e-16	-1.96469	down
TraesCS2B01G154300	184	2	2.37581	0.0292001	0	-5.73305	down
TraesCS2B01G157600	861	141	5.1696	0.859515	0	-2.59767	down
TraesCS2B01G157900	124	43	3.74935	1.32879	2.13e-05	-1.49608	down
TraesCS2B01G158700	45	2	0.708135	0.0423693	7.32e-08	-3.73664	down
TraesCS2B01G158800	390	114	5.95936	1.77266	1.21e-14	-1.76123	down
TraesCS2B01G159700	978	281	19.5961	5.69069	0	-1.79384	down
TraesCS2B01G160600	676	66	11.7231	1.15262	0	-3.32751	down
TraesCS2B01G162000	347	145	6.00824	2.47054	2.12e-07	-1.25033	down
TraesCS2B01G167500	256	109	5.9924	3.4784	4.86e-06	-1.22062	down
TraesCS2B01G167900	380	55	6.26933	0.866967	0	-2.75564	down
TraesCS2B01G168000	37	2	0.964533	0.0692748	6.05e-06	-3.46419	down
TraesCS2B01G168300	595	29	31.7864	1.64404	0	-4.29021	down
TraesCS2B01G169300	341	35	3.19082	0.38998	0	-3.23058	down
TraesCS2B01G171200	747	366	22.2172	11.1963	1.77e-06	-1.02628	down
TraesCS2B01G171300	1115	439	60.3867	26.5152	2.44e-12	-1.34179	down
TraesCS2B01G171600	1071	296	10.2269	2.9638	0	-1.85006	down
TraesCS2B01G172100	331	117	4.12208	1.4555	4.74e-10	-1.48857	down
TraesCS2B01G172400	72	0	0.794356	0	1.11e-16	-5.62669	down
TraesCS2B01G174500	249	32	5.24204	0.701681	0	-2.90305	down
TraesCS2B01G175400	42	1	0.369924	0.0224529	4.69e-08	-4.12792	down
TraesCS2B01G175800	460	210	7.74323	3.68477	9.19e-07	-1.12572	down
TraesCS2B01G177300	100	10	1.97954	0.214086	1.23e-13	-3.14318	down
TraesCS2B01G177500	1688	760	33.9705	15.4872	1.58e-09	-1.14969	down
TraesCS2B01G178500	172	58	4.39737	1.49238	2.72e-07	-1.54418	down
TraesCS2B01G180600	742	324	7.19244	3.86003	7.55e-09	-1.19171	down
TraesCS2B01G182800	1022	0	5.0165	0	0	-9.42655	down
TraesCS2B01G182900	145	4	5.68195	0.169299	0	-4.73853	down
TraesCS2B01G183500	79	2	6.84808	0.23786	1.22e-15	-4.52856	down
TraesCS2B01G183700	859	372	14.9704	10.5349	2.26e-09	-1.20409	down
TraesCS2B01G185100	140	65	4.40163	2.10674	0.00340501	-1.08952	down
TraesCS2B01G187400	665	5	7.37835	0.0833501	0	-6.68281	down
TraesCS2B01G189000	69	0	32.4699	0	7.77e-16	-5.56656	down
TraesCS2B01G189100	372	85	11.5239	2.65585	0	-2.1105	down
TraesCS2B01G189900	223	9	17.4946	1.03059	0	-4.41991	down
TraesCS2B01G190400	273	119	15.4158	6.64851	6.23e-06	-1.18786	down
TraesCS2B01G191900	127	31	1.42107	0.377316	7.31e-09	-1.98368	down
TraesCS2B01G192700	191	0	3.59313	0	0	-7.01589	down
TraesCS2B01G192800	174	71	6.42039	2.63996	3.66e-05	-1.27557	down
TraesCS2B01G193500	311	51	23.1402	3.80367	0	-2.57376	down
TraesCS2B01G196500	879	392	31.678	14.3576	9.39e-09	-1.16199	down
TraesCS2B01G198100	383	69	31.9701	6.04832	0	-2.4475	down
TraesCS2B01G198300	164	65	1.18008	0.428057	2.97e-05	-1.31557	down
TraesCS2B01G198400	299	148	19.1093	9.81574	0.000193457	-1.00728	down
TraesCS2B01G199500	218	80	2.76313	1.74437	2.07e-07	-1.42949	down
TraesCS2B01G199800	50	12	3.98467	0.989805	0.00144999	-1.93261	down
TraesCS2B01G202300	52	2	0.364048	0.0151351	1.62e-09	-3.939	down
TraesCS2B01G202900	0	69	0.000764174	0.567142	7.77e-16	5.56656	up
TraesCS2B01G203900	487	54	6.79402	1.3911	0	-3.13809	down
TraesCS2B01G204500	163	0	5.54507	0	0	-6.7891	down
TraesCS2B01G204600	1223	139	42.0029	6.40211	0	-3.12367	down
TraesCS2B01G207400	158	0	3.42179	0	0	-6.74457	down
TraesCS2B01G208400	132	31	1.51089	0.459231	1.58e-09	-2.03875	down
TraesCS2B01G208900	82	21	0.830047	0.220314	1.13e-05	-1.89244	down
TraesCS2B01G209000	83	29	2.40401	0.873872	0.00114697	-1.47053	down
TraesCS2B01G209300	235	115	1.54422	0.872784	0.000527349	-1.02159	down
TraesCS2B01G209400	77	2	0.413621	0.013678	3.22e-15	-4.49226	down
TraesCS2B01G213400	3851	1738	52.8457	21.3277	5.28e-10	-1.14713	down
TraesCS2B01G213600	547	65	8.77817	1.10787	0	-3.04431	down
TraesCS2B01G216300	61	17	2.19834	0.648612	0.000980553	-1.75703	down
TraesCS2B01G216800	535	233	24.7089	11.0616	4.78e-08	-1.19403	down
TraesCS2B01G217500	50	139	1.0287	2.85398	1.46e-05	1.44815	up
TraesCS2B01G218600	1446	276	41.2484	8.07101	0	-2.38306	down
TraesCS2B01G219800	97	5	4.82156	0.386481	1.11e-16	-3.92424	down
TraesCS2B01G220100	575	154	40.5037	11.0143	0	-1.89049	down
TraesCS2B01G220200	152	68	9.12463	5.25682	0.000913391	-1.1433	down
TraesCS2B01G220600	245	6	5.03226	0.140396	0	-5.04092	down
TraesCS2B01G220700	500	89	8.5735	1.55193	0	-2.47043	down
TraesCS2B01G220900	215	28	3.16942	0.428116	0	-2.87612	down
TraesCS2B01G221100	72	0	1.18016	0	1.11e-16	-5.62669	down
TraesCS2B01G221200	94	13	1.43629	0.211052	7.13e-11	-2.72052	down
TraesCS2B01G222400	218	37	6.88606	1.65924	0	-2.51168	down
TraesCS2B01G223600	1242	518	13.2039	5.34902	4.65e-11	-1.25923	down
TraesCS2B01G225000	0	78	4.2e-06	0.558347	0	5.73992	up
TraesCS2B01G225300	166	40	1.17929	0.613601	4.57e-11	-2.01331	down
TraesCS2B01G226800	47	2	6.68141	0.375436	2.45e-08	-3.79741	down
TraesCS2B01G226900	64	10	2.3077	0.396872	6.53e-07	-2.51117	down
TraesCS2B01G227000	340	130	4.89588	1.88309	8.16e-09	-1.37691	down
TraesCS2B01G227200	405	195	3.90708	1.86471	1.48e-05	-1.04877	down
TraesCS2B01G228300	39	2	1.8055	0.0987522	2e-06	-3.53727	down
TraesCS2B01G229000	381	49	10.1071	1.33394	0	-2.92142	down
TraesCS2B01G231500	141	60	4.97603	2.16473	0.000529476	-1.21247	down
TraesCS2B01G232400	853	44	24.2749	1.29161	0	-4.23152	down
TraesCS2B01G232900	491	133	14.1569	4.09459	0	-1.87262	down
TraesCS2B01G233400	779	352	47.5836	21.9076	3.23e-08	-1.14272	down
TraesCS2B01G234300	249	117	4.22181	2.407	0.000118799	-1.08	down
TraesCS2B01G235700	88	33	1.67903	0.638451	0.00207999	-1.37562	down
TraesCS2B01G238800	55	1	7.91646	0.151123	3.16e-11	-4.50525	down
TraesCS2B01G238900	839	418	12.3192	7.64927	2.51e-06	-1.0026	down
TraesCS2B01G239200	69	0	3.77326	0	7.77e-16	-5.56656	down
TraesCS2B01G239300	95	38	3.06859	2.14479	0.00321346	-1.28895	down
TraesCS2B01G239800	361	0	14.7984	0.0206627	0	-7.92906	down
TraesCS2B01G240000	4022	1545	352.786	137.893	5.55e-15	-1.37945	down
TraesCS2B01G242100	1883	753	23.459	13.0757	6.3e-13	-1.3206	down
TraesCS2B01G242500	489	222	6.7863	3.12669	5.05e-07	-1.13402	down
TraesCS2B01G242600	426	179	5.81377	3.43575	5.14e-08	-1.24398	down
TraesCS2B01G243400	74	10	2.85134	0.423277	8.66e-09	-2.71619	down
TraesCS2B01G243700	316	149	6.46486	2.88933	3e-05	-1.07706	down
TraesCS2B01G244100	120	31	10.398	2.76436	6.2e-08	-1.90286	down
TraesCS2B01G245000	446	1097	5.36711	13.1419	1.84e-11	1.2956	up
TraesCS2B01G245100	6	39	0.208924	1.30502	0.000603434	2.43495	up
TraesCS2B01G245700	43	0	0.234321	0	1.96e-09	-4.90259	down
TraesCS2B01G245900	436	115	11.4057	4.70063	0	-1.90907	down
TraesCS2B01G248000	181	0	5.07174	0	0	-6.93892	down
TraesCS2B01G248500	145	0	8.07682	0.0941048	0	-6.6219	down
TraesCS2B01G251300	652	137	12.9704	2.71631	0	-2.23841	down
TraesCS2B01G252800	70	1	0.852154	0.0281407	9.44e-15	-4.84502	down
TraesCS2B01G253000	63	2	0.360159	0.134138	4.55e-12	-4.20882	down
TraesCS2B01G254600	79	11	2.24098	0.452671	3.37e-09	-2.6883	down
TraesCS2B01G258000	544	0	8.68616	0	0	-8.51867	down
TraesCS2B01G259000	238	2	1.97438	0.3978	0	-6.10168	down
TraesCS2B01G259400	72	0	2.0798	0	1.11e-16	-5.62669	down
TraesCS2B01G259500	374	0	2.52176	0	0	-7.97989	down
TraesCS2B01G261400	325	90	1.81142	0.608179	2.28e-14	-1.83538	down
TraesCS2B01G261800	50	5	0.716706	0.0760912	8.11e-07	-2.98852	down
TraesCS2B01G263200	357	75	4.51249	1.09131	0	-2.22863	down
TraesCS2B01G266000	623	49	15.1311	1.19243	0	-3.62868	down
TraesCS2B01G266900	196	81	1.63304	0.776016	1.85e-05	-1.25952	down
TraesCS2B01G267700	320	131	5.47205	6.99148	1.95e-07	-1.27891	down
TraesCS2B01G268800	527	231	9.31992	3.12185	7.02e-08	-1.18472	down
TraesCS2B01G269300	69	2	4.01575	0.15623	1.97e-13	-4.33717	down
TraesCS2B01G271200	49	4	1.4615	0.138092	2.97e-07	-3.20174	down
TraesCS2B01G271900	2380	1059	22.5559	10.7733	3.7e-10	-1.16714	down
TraesCS2B01G272300	323	134	102.611	41.5784	2.93e-07	-1.26	down
TraesCS2B01G272600	130	58	1.03426	0.499679	0.0024799	-1.14427	down
TraesCS2B01G273000	136	0	0.936632	0	0	-6.53043	down
TraesCS2B01G273400	116	3	11.1739	0.310801	0	-4.7105	down
TraesCS2B01G273800	120	47	0.79455	0.327339	0.000347792	-1.32513	down
TraesCS2B01G273900	721	25	30.1561	1.07368	0	-4.7696	down
TraesCS2B01G274900	59	13	1.56951	0.430895	9.6e-05	-2.06184	down
TraesCS2B01G276000	81	0	4.38628	0.0289895	0	-5.79337	down
TraesCS2B01G276100	43	3	0.984213	0.0724079	1.33e-06	-3.30946	down
TraesCS2B01G276500	169	0	6.81661	0	0	-6.84079	down
TraesCS2B01G277000	57	0	6.31107	0	6.11e-13	-5.29732	down
TraesCS2B01G277600	112	14	2.4437	0.328217	1.8e-13	-2.87337	down
TraesCS2B01G278400	62	4	41.2597	2.66386	4.07e-10	-3.53229	down
TraesCS2B01G278500	123	41	5.1762	2.33813	1.01e-05	-1.55089	down
TraesCS2B01G279200	157	70	4.45474	2.05615	0.000677735	-1.14861	down
TraesCS2B01G280400	76	13	0.722683	0.244648	1.06e-07	-2.41917	down
TraesCS2B01G280500	198	54	4.97084	7.05334	7.32e-11	-1.84607	down
TraesCS2B01G280600	2738	157	45.0738	2.58249	0	-4.11147	down
TraesCS2B01G282400	4288	1463	118.958	40.5786	0	-1.55041	down
TraesCS2B01G284200	47	1	1.09337	0.0798886	2.75e-09	-4.28494	down
TraesCS2B01G285600	0	86	0.000124698	1.86581	0	5.87827	up
TraesCS2B01G285900	407	42	13.2792	1.50696	0	-3.23162	down
TraesCS2B01G286300	79	16	5.1364	1.04569	5.81e-07	-2.20245	down
TraesCS2B01G287200	217	50	3.59908	0.839775	5.51e-14	-2.08526	down
TraesCS2B01G289200	93	18	3.74297	0.720437	1.88e-08	-2.27758	down
TraesCS2B01G290200	103	38	4.50186	2.99182	0.00042255	-1.40387	down
TraesCS2B01G290500	2368	740	17.1217	5.4294	0	-1.67608	down
TraesCS2B01G291300	230	88	3.48647	1.30896	4.35e-07	-1.37118	down
TraesCS2B01G292100	118	0	5.53575	0	0	-6.32798	down
TraesCS2B01G292500	139	10	0.834896	0.0634731	0	-3.61232	down
TraesCS2B01G293400	86	26	0.468678	0.140061	8.59e-05	-1.67031	down
TraesCS2B01G293700	160	59	3.85787	1.46806	6.24e-06	-1.41672	down
TraesCS2B01G295600	98	5	1.96552	0.0613035	1.11e-16	-3.93882	down
TraesCS2B01G298000	892	357	20.6644	8.25528	2.42e-11	-1.31753	down
TraesCS2B01G299300	375	176	2.40177	1.09249	9.06e-06	-1.08489	down
TraesCS2B01G302000	85	189	1.47018	3.12088	0.000227987	1.13913	up
TraesCS2B01G302400	254	78	7.7959	2.4857	7.38e-11	-1.68445	down
TraesCS2B01G304400	142	63	5.10758	2.06101	0.00121906	-1.15384	down
TraesCS2B01G306600	113	35	5.45569	1.73813	5.93e-06	-1.64972	down
TraesCS2B01G307400	62	151	1.11181	2.69372	0.000139963	1.26415	up
TraesCS2B01G308400	45	2	1.62328	0.0787599	7.32e-08	-3.73664	down
TraesCS2B01G308500	843	366	33.0285	14.8038	2.85e-09	-1.20038	down
TraesCS2B01G309500	294	125	2.5153	1.07649	1.52e-06	-1.2241	down
TraesCS2B01G311900	1121	237	19.6664	4.02864	0	-2.23471	down
TraesCS2B01G312000	365	178	23.1931	11.3075	4.08e-05	-1.02988	down
TraesCS2B01G312600	188	43	41.4172	9.35192	8.8e-13	-2.09063	down
TraesCS2B01G313500	151	43	15.2389	4.41611	1.85e-08	-1.77722	down
TraesCS2B01G314500	64	15	2.13857	0.517775	7.35e-05	-1.98986	down
TraesCS2B01G315100	676	245	21.7648	8.08854	7.75e-13	-1.45868	down
TraesCS2B01G315600	83	0	4.43719	0	0	-5.82793	down
TraesCS2B01G317500	129	270	5.94341	12.4642	0.000117943	1.05698	up
TraesCS2B01G318300	88	36	5.02521	2.5604	0.0078588	-1.25528	down
TraesCS2B01G319700	167	80	2.04427	0.929447	0.00227676	-1.04799	down
TraesCS2B01G320300	55	125	0.916279	2.1303	0.00246377	1.16299	up
TraesCS2B01G320800	261	83	1.08821	0.350135	1.77e-10	-1.63544	down
TraesCS2B01G322600	48	13	1.39391	0.391519	0.00664079	-1.77227	down
TraesCS2B01G323600	43	4	1.40992	0.158064	6.41e-06	-3.01922	down
TraesCS2B01G324800	88	32	2.13458	1.37427	0.00128619	-1.41807	down
TraesCS2B01G326200	46	11	1.14427	0.263401	0.00316915	-1.92708	down
TraesCS2B01G326300	1235	555	15.369	6.82943	3.59e-09	-1.15183	down
TraesCS2B01G326500	117	1	1.47392	0.0421519	0	-5.57399	down
TraesCS2B01G327800	74	0	2.05836	0	0	-5.66543	down
TraesCS2B01G328100	62	0	1.45025	0	3.73e-14	-5.41567	down
TraesCS2B01G329500	50	0	0.355326	0	3.31e-11	-5.11342	down
TraesCS2B01G330300	43	8	1.3216	0.260586	0.00078344	-2.22932	down
TraesCS2B01G332400	200	72	10.0516	2.56957	3e-07	-1.45512	down
TraesCS2B01G333900	191	52	9.03306	2.50176	1.28e-10	-1.84749	down
TraesCS2B01G334800	172	57	4.85105	1.82606	1.69e-07	-1.56863	down
TraesCS2B01G335800	659	240	18.0458	6.06196	1.28e-12	-1.45158	down
TraesCS2B01G336400	398	176	11.9493	5.44378	6.63e-07	-1.17043	down
TraesCS2B01G337300	83	16	1.92519	0.388347	1.27e-07	-2.27242	down
TraesCS2B01G337400	51	137	0.867824	2.63132	3.64e-05	1.39971	up
TraesCS2B01G339200	43	5	1.38375	0.183953	2.59e-05	-2.7777	down
TraesCS2B01G340300	47	2	3.70493	0.211581	2.45e-08	-3.79741	down
TraesCS2B01G340800	56	213	0.773516	2.89935	6.31e-12	1.89958	up
TraesCS2B01G341200	88	32	2.98271	1.1137	0.00128619	-1.41807	down
TraesCS2B01G341300	439	170	16.0902	6.19894	1.18e-09	-1.361	down
TraesCS2B01G342600	371	54	5.05565	1.02852	0	-2.74696	down
TraesCS2B01G343600	177	1	5.30209	0.0433995	0	-6.16508	down
TraesCS2B01G343900	89	0	10.6115	0	0	-5.92691	down
TraesCS2B01G344000	7	60	0.0629016	0.539117	1.05e-07	2.85691	up
TraesCS2B01G344600	1723	376	64.4812	17.6495	0	-2.19167	down
TraesCS2B01G345300	155	53	36.1116	25.4009	1.33e-06	-1.52205	down
TraesCS2B01G346800	146	35	8.51428	2.15089	4.24e-10	-2.01512	down
TraesCS2B01G348500	358	173	8.68595	5.74578	3.31e-05	-1.04282	down
TraesCS2B01G348800	115	0	9.62872	0	0	-6.2913	down
TraesCS2B01G350600	3314	1027	138.314	54.8847	0	-1.6887	down
TraesCS2B01G350900	47	0	1.30521	0	1.88e-10	-5.02681	down
TraesCS2B01G351400	350	95	1.54394	0.428436	2.44e-15	-1.86506	down
TraesCS2B01G352100	76	0	4.10952	0	0	-5.70316	down
TraesCS2B01G354400	1324	486	12.1957	5.49446	1.01e-14	-1.44309	down
TraesCS2B01G355800	328	160	5.27317	2.77207	7.36e-05	-1.0288	down
TraesCS2B01G356500	353	169	7.04121	3.39408	2.6e-05	-1.05607	down
TraesCS2B01G360300	856	1	13.7334	0.0171162	0	-8.42937	down
TraesCS2B01G360500	107	4	7.70406	0.394624	0	-4.30528	down
TraesCS2B01G361000	74	20	0.272164	0.0753073	8.56e-05	-1.81275	down
TraesCS2B01G362000	300	127	6.49398	2.74028	1.11e-06	-1.23047	down
TraesCS2B01G364000	88	3	2.31336	0.0862296	1.11e-16	-4.31775	down
TraesCS2B01G364900	44	117	0.363588	0.95871	0.000194834	1.3812	up
TraesCS2B01G365500	119	18	1.34074	0.314714	1.24e-12	-2.62827	down
TraesCS2B01G365900	196	27	6.84648	0.997508	0	-2.79337	down
TraesCS2B01G366700	166	82	2.41075	1.19714	0.0046195	-1.00442	down
TraesCS2B01G367100	66	7	1.48377	0.20223	6.42e-09	-2.99123	down
TraesCS2B01G367300	2066	175	98.4677	12.2051	0	-3.55024	down
TraesCS2B01G367700	177	27	2.92368	0.599693	0	-2.64743	down
TraesCS2B01G368200	514	60	9.87456	1.47108	0	-3.06758	down
TraesCS2B01G368700	60	10	1.17266	0.195219	3.66e-06	-2.42025	down
TraesCS2B01G369000	8638	925	375.374	36.3081	0	-3.2211	down
TraesCS2B01G369100	1930	0	96.2683	0	0	-10.3428	down
TraesCS2B01G369400	50	5	0.343378	0.0391302	8.11e-07	-2.98852	down
TraesCS2B01G370500	47	0	0.78404	0	1.88e-10	-5.02681	down
TraesCS2B01G370600	1180	554	18.2294	8.84602	4.52e-08	-1.08878	down
TraesCS2B01G371400	71	18	2.3603	1.05951	5.76e-05	-1.89519	down
TraesCS2B01G372700	598	167	24.8225	8.53681	0	-1.83109	down
TraesCS2B01G374100	307	0	4.02862	0	0	-7.69634	down
TraesCS2B01G374600	466	96	11.4577	2.33378	0	-2.26164	down
TraesCS2B01G376600	83	29	1.84812	0.633495	0.00114697	-1.47053	down
TraesCS2B01G376700	107	36	1.96275	0.793075	5.41e-05	-1.53305	down
TraesCS2B01G376800	763	328	21.7268	9.57165	2.92e-09	-1.21427	down
TraesCS2B01G377100	428	151	4.37002	1.77635	2.23e-11	-1.49393	down
TraesCS2B01G378400	955	399	11.86	4.97342	1.84e-10	-1.25599	down
TraesCS2B01G379400	257	28	1.57467	0.178876	0	-3.13193	down
TraesCS2B01G379900	67	5	0.401922	0.0352661	1.9e-10	-3.40014	down
TraesCS2B01G382300	152	66	1.91605	0.836195	0.000471634	-1.18543	down
TraesCS2B01G383200	103	0	4.19235	0	0	-6.13445	down
TraesCS2B01G383600	242	99	8.49411	3.56442	2.21e-06	-1.27683	down
TraesCS2B01G385600	0	44	7.27e-05	1.43039	1.09e-09	4.93466	up
TraesCS2B01G386200	51	2	0.546515	0.0419261	2.78e-09	-3.91177	down
TraesCS2B01G386900	5868	358	341.139	20.6708	0	-4.02922	down
TraesCS2B01G388500	83	24	2.13658	0.832677	6.31e-05	-1.72895	down
TraesCS2B01G388800	47	12	0.97592	0.25626	0.00466077	-1.846	down
TraesCS2B01G388900	153	68	2.77202	1.98526	0.000755513	-1.15267	down
TraesCS2B01G389200	81	12	4.60526	0.720128	4.63e-09	-2.61257	down
TraesCS2B01G389300	55	0	0.786075	0	1.89e-12	-5.24713	down
TraesCS2B01G389400	1427	414	16.4378	4.79836	0	-1.78161	down
TraesCS2B01G389600	0	117	6.82e-06	2.78375	0	6.31586	up
TraesCS2B01G391200	196	90	2.11419	1.1175	0.000301858	-1.11012	down
TraesCS2B01G391900	546	165	9.71144	3.62856	4.44e-16	-1.71741	down
TraesCS2B01G395000	52	0	1.62647	0	1.05e-11	-5.1684	down
TraesCS2B01G396700	534	222	30.3402	11.2022	5.83e-09	-1.26066	down
TraesCS2B01G397800	161	48	7.29006	2.25044	2.39e-08	-1.7152	down
TraesCS2B01G398300	1147	265	14.2481	4.80084	0	-2.1076	down
TraesCS2B01G399000	335	151	4.75193	2.14613	4.41e-06	-1.14186	down
TraesCS2B01G400000	123	56	3.68668	2.55664	0.00520763	-1.11468	down
TraesCS2B01G401300	62	8	0.488005	0.0664368	1.51e-07	-2.74239	down
TraesCS2B01G403800	164	0	13.3442	0.00211527	0	-6.79785	down
TraesCS2B01G404400	63	19	0.789788	0.248738	0.00184517	-1.65428	down
TraesCS2B01G405300	67	1	0.458718	0.0109757	4.65e-14	-4.78316	down
TraesCS2B01G406400	371	35	8.87701	1.03433	0	-3.35172	down
TraesCS2B01G406900	199	2	5.54431	0.0635841	0	-5.84524	down
TraesCS2B01G407400	177	21	2.29162	0.300095	0	-2.98864	down
TraesCS2B01G407600	677	6	39.6662	0.3818	0	-6.50173	down
TraesCS2B01G407900	462	167	4.85215	2.3502	3e-11	-1.45989	down
TraesCS2B01G408300	263	0	4.9739	0	0	-7.47433	down
TraesCS2B01G408600	393	44	5.85228	0.621711	0	-3.11644	down
TraesCS2B01G411000	71	12	0.727677	0.155276	2.9e-07	-2.42612	down
TraesCS2B01G411800	70	25	8.85496	3.21288	0.00627413	-1.43238	down
TraesCS2B01G413000	4027	1977	133.676	62.6654	9.88e-08	-1.02584	down
TraesCS2B01G413800	126	42	6.46377	2.24654	7.73e-06	-1.55169	down
TraesCS2B01G414100	89	0	2.45156	0.0150166	0	-5.92691	down
TraesCS2B01G414200	231	16	3.09031	0.18443	0	-3.73277	down
TraesCS2B01G414700	558	96	21.7314	7.41863	0	-2.52082	down
TraesCS2B01G414800	94	8	2.91463	0.268459	8.55e-14	-3.33123	down
TraesCS2B01G415100	40	4	1.05972	0.129647	2.98e-05	-2.91849	down
TraesCS2B01G415300	218	78	3.63856	1.36735	9.43e-08	-1.46534	down
TraesCS2B01G415400	364	121	7.84229	3.01941	1.11e-11	-1.57719	down
TraesCS2B01G416700	148	10	3.1846	0.234597	0	-3.70191	down
TraesCS2B01G417000	271	6	13.2677	0.265108	0	-5.18559	down
TraesCS2B01G418100	151	45	3.81297	2.71229	5.84e-08	-1.71378	down
TraesCS2B01G418200	261	4	10.5985	0.203762	0	-5.58	down
TraesCS2B01G418300	43	0	0.921375	0	1.96e-09	-4.90259	down
TraesCS2B01G419300	50	14	1.59583	0.482962	0.00640297	-1.73313	down
TraesCS2B01G419400	585	263	21.1131	9.46374	1.15e-07	-1.1489	down
TraesCS2B01G422200	62	2	1.57067	0.0830143	7.71e-12	-4.18627	down
TraesCS2B01G424400	169	73	5.96432	5.26274	0.000189762	-1.1946	down
TraesCS2B01G424500	52	3	0.759527	0.0512948	1.15e-08	-3.57527	down
TraesCS2B01G424800	153	12	8.73256	0.72587	0	-3.51781	down
TraesCS2B01G425500	616	121	4.64799	1.0407	0	-2.33378	down
TraesCS2B01G425800	143	0	3.79255	0	0	-6.60207	down
TraesCS2B01G426000	57	0	0.543544	0	6.11e-13	-5.29732	down
TraesCS2B01G426500	448	5	50.846	0.697959	0	-6.11451	down
TraesCS2B01G427700	503	120	11.5171	2.35994	0	-2.05401	down
TraesCS2B01G428300	238	13	6.88184	0.394083	0	-4.04709	down
TraesCS2B01G428500	196	8	6.40856	0.412478	0	-4.37961	down
TraesCS2B01G429300	51	121	1.64103	3.89558	0.00135824	1.22259	up
TraesCS2B01G430000	383	82	5.98653	1.31819	0	-2.20331	down
TraesCS2B01G430900	102	17	1.9648	0.29127	2.47e-10	-2.48485	down
TraesCS2B01G431400	74	11	1.39719	0.343021	2.79e-08	-2.59577	down
TraesCS2B01G434100	69	11	6.308	1.04609	2.31e-07	-2.4969	down
TraesCS2B01G435600	122	47	1.1278	0.438952	0.000217258	-1.34868	down
TraesCS2B01G435700	432	20	14.9008	1.01659	0	-4.33443	down
TraesCS2B01G435900	85	16	2.04233	0.399992	5.89e-08	-2.30618	down
TraesCS2B01G437400	77	18	0.535857	0.129505	6.65e-06	-2.00992	down
TraesCS2B01G438400	101	1	2.50822	0.0394341	0	-5.3647	down
TraesCS2B01G439500	43	2	0.56476	0.058097	2.2e-07	-3.6732	down
TraesCS2B01G439900	506	66	6.35338	0.84115	0	-2.91068	down
TraesCS2B01G440700	424	0	4.61425	0.0179298	0	-8.16024	down
TraesCS2B01G442700	57	0	2.07899	0	6.11e-13	-5.29732	down
TraesCS2B01G442900	1024	223	15.1576	4.7276	0	-2.1916	down
TraesCS2B01G443900	79	1	7.99004	0.178618	0	-5.01609	down
TraesCS2B01G445100	3446	0	27.5067	0	0	-11.1786	down
TraesCS2B01G445200	2713	0	21.9106	0	0	-10.8337	down
TraesCS2B01G445300	5555	0	185.916	0.00955986	0	-11.8672	down
TraesCS2B01G445400	327	0	5.53783	0	0	-7.78696	down
TraesCS2B01G445500	6273	75	50.2913	0.672212	0	-6.35813	down
TraesCS2B01G445600	4688	510	101.09	11.1334	0	-3.19666	down
TraesCS2B01G446100	1058	230	15.742	3.2428	0	-2.19436	down
TraesCS2B01G446300	67	9	2.26139	0.330749	5.52e-08	-2.70719	down
TraesCS2B01G447500	16948	0	1250.22	0.0397975	0	-13.4762	down
TraesCS2B01G447600	39122	8	3086.63	0.709946	0	-12.0097	down
TraesCS2B01G447800	74	8	2.90413	0.317635	6.57e-10	-2.99216	down
TraesCS2B01G448100	130	344	11.6773	31.8431	4.56e-09	1.39371	up
TraesCS2B01G448200	283	75	1.64896	0.492574	4.53e-14	-1.89507	down
TraesCS2B01G449100	326	102	4.2995	1.34586	3.83e-12	-1.66198	down
TraesCS2B01G451300	111	0	2.89961	0	0	-6.24089	down
TraesCS2B01G451400	120	0	2.66664	0	0	-6.35193	down
TraesCS2B01G451600	370	144	6.41314	1.93676	7.29e-09	-1.35242	down
TraesCS2B01G452200	49	8	1.08652	0.159266	5.41e-05	-2.41185	down
TraesCS2B01G452300	297	1	44.1641	0.0913357	0	-6.90693	down
TraesCS2B01G452900	320	159	23.0388	13.5073	0.000152075	-1.0023	down
TraesCS2B01G453000	134	8	2.01902	0.119959	0	-3.83601	down
TraesCS2B01G453300	616	232	4.76532	2.00936	1.42e-11	-1.40307	down
TraesCS2B01G454000	9174	3038	56.404	20.1947	0	-1.59396	down
TraesCS2B01G454100	81	2	1.85307	0.0644491	3.33e-16	-4.56398	down
TraesCS2B01G454300	285	126	15.0772	6.93182	7.16e-06	-1.16812	down
TraesCS2B01G455900	404	44	7.35334	1.01161	0	-3.15612	down
TraesCS2B01G456000	147	36	17.5721	4.39578	6.39e-10	-1.98586	down
TraesCS2B01G456100	936	350	22.1577	8.33693	3.26e-13	-1.41533	down
TraesCS2B01G457800	409	148	66.4012	53.8675	1.17e-10	-1.45731	down
TraesCS2B01G458100	520	219	90.0581	44.6948	1.28e-08	-1.24194	down
TraesCS2B01G458500	100	34	1.55791	0.540464	0.000130052	-1.51592	down
TraesCS2B01G458800	502	27	33.9304	1.5419	0	-4.14356	down
TraesCS2B01G459100	125	14	3.73631	0.457249	1.11e-15	-3.02983	down
TraesCS2B01G459800	160	26	4.21331	0.608805	3e-15	-2.55458	down
TraesCS2B01G461300	1033	186	10.6305	1.9192	0	-2.46405	down
TraesCS2B01G463500	277	108	6.45246	3.10046	1.28e-07	-1.34685	down
TraesCS2B01G464300	19	116	2.83668	17.0039	1.06e-11	2.5197	up
TraesCS2B01G464500	52	6	0.180377	0.0219261	1.22e-06	-2.83667	down
TraesCS2B01G464700	231	108	5.88264	2.81289	0.000166248	-1.08639	down
TraesCS2B01G465200	56	4	1.12898	0.099027	8.42e-09	-3.38907	down
TraesCS2B01G467400	293	52	3.28311	0.693122	0	-2.46094	down
TraesCS2B01G468200	183	57	4.89466	4.6059	1.32e-08	-1.65733	down
TraesCS2B01G469000	960	423	22.7047	10.1739	3.32e-09	-1.17955	down
TraesCS2B01G469100	222	2	4.44694	0.0747247	0	-6.00192	down
TraesCS2B01G471700	2634	0	191.514	5.19e-10	0	-10.7911	down
TraesCS2B01G472100	290	0	30.0282	0	0	-7.61456	down
TraesCS2B01G473600	309	48	3.90797	0.62772	0	-2.6494	down
TraesCS2B01G473800	71	1	3.84189	0.0890077	5.66e-15	-4.86506	down
TraesCS2B01G475100	203	0	7.21021	0	0	-7.10314	down
TraesCS2B01G475200	136	26	9.50405	1.87191	7.81e-12	-2.32246	down
TraesCS2B01G475400	163	0	21.9249	0	0	-6.7891	down
TraesCS2B01G475800	46	0	5.94259	0	3.37e-10	-4.99674	down
TraesCS2B01G475900	60	0	2.33297	0	1.13e-13	-5.36949	down
TraesCS2B01G476300	106	0	21.8973	0	0	-6.17529	down
TraesCS2B01G476400	157	28	7.96648	1.45603	5.22e-14	-2.4262	down
TraesCS2B01G476700	325	4	41.0199	1.47175	0	-5.89478	down
TraesCS2B01G477000	59	13	4.30469	0.978978	9.6e-05	-2.06184	down
TraesCS2B01G477300	962	349	8.40647	3.18455	4.15e-14	-1.4589	down
TraesCS2B01G477900	79	24	1.12908	0.334772	0.000226521	-1.65898	down
TraesCS2B01G478100	4084	1802	58.6133	26.0126	1.14e-10	-1.17972	down
TraesCS2B01G478300	700	243	8.09954	3.23705	4.88e-14	-1.52066	down
TraesCS2B01G478700	789	171	20.1738	4.40742	0	-2.19625	down
TraesCS2B01G478900	40	0	0.270981	0	1.16e-08	-4.80187	down
TraesCS2B01G479000	37	2	0.752434	0.0662591	6.05e-06	-3.46419	down
TraesCS2B01G480100	92	9	2.92081	0.295335	9.17e-13	-3.15612	down
TraesCS2B01G480200	472	228	20.8488	15.4373	7.49e-06	-1.04491	down
TraesCS2B01G481200	77	12	4.64369	0.77422	2.43e-08	-2.54085	down
TraesCS2B01G481700	86	2	1.12108	0.036424	0	-4.64888	down
TraesCS2B01G482200	268	0	922.544	0	0	-7.50134	down
TraesCS2B01G482500	294	4	1094.34	13.9336	0	-5.75085	down
TraesCS2B01G482600	208	0	919.07	0	0	-7.13799	down
TraesCS2B01G482700	370	28	1505.78	100.951	0	-3.65515	down
TraesCS2B01G482800	31013	4472	1718.55	107.722	0	-2.79347	down
TraesCS2B01G483000	294	0	557.549	0.90648	0	-7.63422	down
TraesCS2B01G483200	451	96	8.66257	1.84439	0	-2.21459	down
TraesCS2B01G483400	201	6	2.07856	0.0737286	0	-4.75724	down
TraesCS2B01G483500	50	8	1.28058	0.207805	3.45e-05	-2.44014	down
TraesCS2B01G484100	76	9	2.29263	0.246127	1.03e-09	-2.88531	down
TraesCS2B01G485000	65	9	0.55104	0.077233	1.34e-07	-2.66443	down
TraesCS2B01G489700	101	17	0.826068	0.152407	3.6e-10	-2.47084	down
TraesCS2B01G490100	2519	579	29.1224	9.20715	0	-2.11837	down
TraesCS2B01G490700	110	27	3.26567	0.811792	8.36e-08	-1.96849	down
TraesCS2B01G490800	40	0	10.2772	0	1.16e-08	-4.80187	down
TraesCS2B01G490900	511	176	16.0774	5.64851	9.3e-13	-1.5298	down
TraesCS2B01G491400	1830	95	39.8224	2.12683	0	-4.24653	down
TraesCS2B01G498100	56	3	3.60249	0.242484	1.41e-09	-3.67931	down
TraesCS2B01G499300	58	1	1.29904	0.0243098	6.07e-12	-4.57991	down
TraesCS2B01G499600	767	285	16.1029	4.42356	1.05e-12	-1.42355	down
TraesCS2B01G503500	218	77	17.353	6.26752	6.29e-08	-1.48361	down
TraesCS2B01G504000	60	14	0.814475	0.201153	0.000149886	-1.9892	down
TraesCS2B01G510100	182	80	5.11048	2.272	0.000167802	-1.17103	down
TraesCS2B01G510300	145	506	2.60704	9.03445	0	1.7926	up
TraesCS2B01G510900	136	54	1.23481	0.529492	0.000159584	-1.30907	down
TraesCS2B01G512000	195	451	2.71913	5.73617	1.11e-07	1.20344	up
TraesCS2B01G515900	344	33	9.84858	1.06586	0	-3.32449	down
TraesCS2B01G516700	6262	1867	122.212	37.7642	0	-1.7451	down
TraesCS2B01G517400	1051	379	31.1847	11.1748	1.47e-14	-1.46788	down
TraesCS2B01G518300	1043	0	33.6576	0	0	-9.45585	down
TraesCS2B01G518500	1	167	0.0668943	6.74199	0	6.0819	up
TraesCS2B01G518900	95	40	2.56212	1.10389	0.00728996	-1.21767	down
TraesCS2B01G519100	391	8	9.58943	0.200792	0	-5.3705	down
TraesCS2B01G519800	299	45	17.736	2.73826	0	-2.69239	down
TraesCS2B01G520200	18	74	8.72238	33.7299	1.97e-05	1.9537	up
TraesCS2B01G520500	100	36	0.647393	0.284581	0.000356739	-1.43682	down
TraesCS2B01G520600	137	38	1.86616	0.525731	4.12e-08	-1.81029	down
TraesCS2B01G520700	101	2	9.53049	0.246372	0	-4.87718	down
TraesCS2B01G521700	1857	797	33.6419	14.7383	6.57e-11	-1.21879	down
TraesCS2B01G524100	1021	494	29.7899	16.1704	3.32e-07	-1.04516	down
TraesCS2B01G524500	232	47	10.4798	2.20762	2.22e-16	-2.26766	down
TraesCS2B01G525500	417	99	6.00025	1.50766	0	-2.05817	down
TraesCS2B01G525700	71	3	4.70412	0.212552	6.33e-13	-4.0138	down
TraesCS2B01G525800	57	11	1.52161	0.306635	3.55e-05	-2.22766	down
TraesCS2B01G525900	437	155	6.54377	2.45533	2.26e-11	-1.48649	down
TraesCS2B01G526100	88	0	4.66263	0	0	-5.91088	down
TraesCS2B01G526700	1188	549	34.1958	102.014	1.9e-08	-1.11156	down
TraesCS2B01G528100	208	21	6.64874	0.911665	0	-3.21968	down
TraesCS2B01G529700	3204	554	34.6853	6.10353	0	-2.52872	down
TraesCS2B01G530000	306	71	8.9391	2.25526	0	-2.08473	down
TraesCS2B01G530100	398	155	10.3736	4.07445	3.76e-09	-1.3521	down
TraesCS2B01G530600	46	155	1.08438	3.67853	3.63e-08	1.72043	up
TraesCS2B01G536200	43	115	0.462154	1.2186	0.000203319	1.38871	up
TraesCS2B01G545200	78	27	1.6322	0.575771	0.00170797	-1.4804	down
TraesCS2B01G563700	95	450	1.9866	9.55922	0	2.22627	up
TraesCS2B01G572500	58	135	6.8265	16.1451	0.000893148	1.19811	up
TraesCS2B01G575800	0	56	0.00170968	0.401993	1.08e-12	5.27244	up
TraesCS2B01G578200	1785	791	23.1398	10.4202	5.28e-10	-1.17267	down
TraesCS2B01G608800	7	47	0.0641486	0.265705	4.44e-05	2.51422	up
TraesCS2B01G614400	1956	541	94.1336	26.7672	0	-1.85134	down
TraesCS2B01G615800	44	9	1.4341	0.319443	0.00130741	-2.11682	down
TraesCS2B01G623700	7	69	0.102082	0.937873	1.59e-09	3.05398	up
TraesCS2B01G624200	111	239	3.16029	6.82914	0.000110457	1.0962	up
TraesCS2B01G625400	135	462	0.815578	2.79319	7.77e-16	1.76376	up
TraesCS2D01G000300	3005	1355	43.5795	19.9503	6.19e-10	-1.1482	down
TraesCS2D01G004200	475	131	11.5764	3.24896	0	-1.84658	down
TraesCS2D01G007800	54	0	1.40536	0	3.35e-12	-5.22136	down
TraesCS2D01G013100	232	31	1.74016	0.233253	0	-2.84539	down
TraesCS2D01G016400	69	0	0.506515	8.12e-05	7.77e-16	-5.56656	down
TraesCS2D01G016600	204	3	6.33897	0.119112	0	-5.51705	down
TraesCS2D01G021500	2160	877	44.152	18.2085	1.15e-12	-1.29893	down
TraesCS2D01G021600	52	5	0.717365	0.0735978	3.02e-07	-3.0435	down
TraesCS2D01G028900	158	37	4.86934	1.19148	5.39e-11	-2.05099	down
TraesCS2D01G029300	1054	464	22.0536	9.78805	2.1e-09	-1.1811	down
TraesCS2D01G029500	3621	1554	62.0368	26.8406	1.93e-11	-1.21961	down
TraesCS2D01G042200	149	62	1.06175	0.445064	0.000211132	-1.2451	down
TraesCS2D01G044100	931	149	66.4467	10.7297	0	-2.63144	down
TraesCS2D01G044600	143	32	2.68666	0.618153	1.15e-10	-2.10926	down
TraesCS2D01G050800	159	50	3.93743	1.26299	1.15e-07	-1.64017	down
TraesCS2D01G052900	88	271	1.97757	4.9094	2.25e-10	1.60643	up
TraesCS2D01G060700	414	79	7.91314	1.55813	0	-2.36797	down
TraesCS2D01G063000	12891	4718	566.509	208.295	1.11e-16	-1.44983	down
TraesCS2D01G069500	1151	506	13.6667	5.94355	1.36e-09	-1.18331	down
TraesCS2D01G073400	228	79	3.41434	1.27268	2e-08	-1.51158	down
TraesCS2D01G075000	1603	603	28.4289	11.6556	1.91e-14	-1.40833	down
TraesCS2D01G075200	119	18	5.54886	0.885512	1.24e-12	-2.62827	down
TraesCS2D01G090800	49	112	1.94372	4.50689	0.00462176	1.16854	up
TraesCS2D01G091000	187	77	4.73667	1.98561	2.5e-05	-1.26394	down
TraesCS2D01G093900	139	26	4.87738	0.917541	2.91e-12	-2.3536	down
TraesCS2D01G098600	51	6	0.382119	0.051511	1.97e-06	-2.80945	down
TraesCS2D01G101300	319	156	7.76928	3.88295	9.3e-05	-1.02503	down
TraesCS2D01G101400	2786	1339	89.2534	44.1787	3.37e-08	-1.05621	down
TraesCS2D01G101800	381	109	4.02945	1.11952	6.44e-15	-1.79153	down
TraesCS2D01G105500	223	104	4.61801	2.15547	0.000194756	-1.08956	down
TraesCS2D01G114800	1815	856	104.743	50.4467	2e-08	-1.08296	down
TraesCS2D01G117400	767	323	70.3162	29.7586	9.78e-10	-1.24386	down
TraesCS2D01G121400	181	43	6.02565	1.46912	5.82e-12	-2.03633	down
TraesCS2D01G123000	2925	1441	35.8688	18.8397	1.37e-07	-1.02061	down
TraesCS2D01G124900	544	257	3.57968	1.64373	1.48e-06	-1.07745	down
TraesCS2D01G136200	614	306	4.08167	2.06253	7.96e-06	-1.0012	down
TraesCS2D01G151700	124	37	2.8908	0.817994	8.59e-07	-1.70509	down
TraesCS2D01G154000	1	78	0.0106998	0.530486	2.22e-16	4.99805	up
TraesCS2D01G157800	2369	953	39.4852	16.1271	4.74e-13	-1.31239	down
TraesCS2D01G163300	1883	515	115.729	31.5738	0	-1.86737	down
TraesCS2D01G174500	191	90	1.79136	0.852327	0.000683126	-1.07312	down
TraesCS2D01G183400	43	8	0.338706	0.0630025	0.00078344	-2.22932	down
TraesCS2D01G192200	63	5	4.57256	0.392059	1.34e-09	-3.31332	down
TraesCS2D01G197600	1221	182	57.146	8.77215	0	-2.73607	down
TraesCS2D01G198200	0	89	8.94e-05	1.91041	0	5.92691	up
TraesCS2D01G200500	94	18	4.24703	0.836219	1.3e-08	-2.29277	down
TraesCS2D01G207200	479	33	24.5633	1.74611	0	-3.80036	down
TraesCS2D01G211100	183	6	5.11831	0.182993	0	-4.62293	down
TraesCS2D01G217600	1535	762	16.7953	8.12186	4.54e-07	-1.00896	down
TraesCS2D01G223000	934	381	13.2261	5.50418	5.41e-11	-1.29031	down
TraesCS2D01G223100	309	142	4.53403	2.10916	1.47e-05	-1.11361	down
TraesCS2D01G233300	173	83	20.2909	9.59897	0.00191257	-1.04632	down
TraesCS2D01G233800	84	27	0.718195	0.236651	0.000286601	-1.58539	down
TraesCS2D01G237200	143	355	0.865826	2.13283	4.23e-08	1.30291	up
TraesCS2D01G239300	129	59	4.96549	2.36998	0.00421487	-1.1092	down
TraesCS2D01G250900	0	51	0.000621121	2.83108	1.86e-11	5.14117	up
TraesCS2D01G255500	234	477	3.00086	6.07467	1.29e-05	1.02283	up
TraesCS2D01G257700	26	74	1.9233	5.5739	0.00325943	1.45747	up
TraesCS2D01G261100	207	72	5.69927	2.04237	7.19e-08	-1.50439	down
TraesCS2D01G264400	57	17	5.43431	1.6866	0.0039566	-1.66159	down
TraesCS2D01G293400	136	4	8.56851	0.26811	0	-4.64705	down
TraesCS2D01G294600	153	50	6.73252	2.25997	4.99e-07	-1.5852	down
TraesCS2D01G296100	141	62	4.81378	2.14556	0.00106134	-1.16629	down
TraesCS2D01G304300	267	127	7.3426	3.61325	0.000110425	-1.06323	down
TraesCS2D01G304600	196	89	9.6648	5.17481	0.000226536	-1.12597	down
TraesCS2D01G306000	75	21	1.16253	0.377956	0.000121095	-1.76611	down
TraesCS2D01G314400	398	162	13.2213	5.53319	2.38e-08	-1.28897	down
TraesCS2D01G316300	311	147	12.3091	6.66504	3.58e-05	-1.07346	down
TraesCS2D01G320300	151	64	3.67631	1.70046	0.000288079	-1.2194	down
TraesCS2D01G320900	58	19	4.55124	1.55262	0.00960028	-1.53785	down
TraesCS2D01G322200	863	396	27.3407	12.9193	4.36e-08	-1.12094	down
TraesCS2D01G323500	55	143	2.48665	6.38744	5.06e-05	1.35494	up
TraesCS2D01G324700	497	41	14.6341	1.29523	0	-3.55245	down
TraesCS2D01G326900	1222	536	24.6373	10.6182	9.48e-10	-1.1867	down
TraesCS2D01G339700	61	20	2.82444	1.00636	0.00651322	-1.54008	down
TraesCS2D01G340600	515	254	9.43497	4.69339	1.11e-05	-1.01548	down
TraesCS2D01G343800	70	20	1.51407	0.588494	0.000334004	-1.7342	down
TraesCS2D01G347200	471	171	12.9575	4.90277	3.02e-11	-1.45379	down
TraesCS2D01G347500	54	10	4.70603	0.895887	4.76e-05	-2.27211	down
TraesCS2D01G363700	82	180	0.937062	2.25452	0.000439024	1.12024	up
TraesCS2D01G364500	112	5	6.0884	0.319727	0	-4.12876	down
TraesCS2D01G364600	60	1	3.72925	0.0659484	2.04e-12	-4.62762	down
TraesCS2D01G367400	97	35	3.13014	1.23922	0.000487806	-1.43254	down
TraesCS2D01G367900	66	21	1.27412	0.432227	0.00234794	-1.5855	down
TraesCS2D01G370800	153	35	4.28771	0.598041	5.42e-11	-2.08202	down
TraesCS2D01G371400	62	1	4.35205	0.113248	6.87e-13	-4.6738	down
TraesCS2D01G374400	175	66	4.41358	1.69652	4.5e-06	-1.38688	down
TraesCS2D01G374600	51	5	0.862436	0.066684	4.95e-07	-3.01627	down
TraesCS2D01G376000	730	1571	41.4096	89.7227	1.17e-08	1.10414	up
TraesCS2D01G381000	165	50	2.65732	0.851397	2.6e-08	-1.69312	down
TraesCS2D01G384400	115	41	2.84468	1.21902	8.02e-05	-1.45507	down
TraesCS2D01G387100	1571	689	18.3767	8.22857	4.02e-10	-1.18736	down
TraesCS2D01G391700	376	95	26.7911	6.80985	0	-1.96802	down
TraesCS2D01G396200	48	4	0.872696	0.0779954	4.96e-07	-3.17288	down
TraesCS2D01G396300	895	445	13.0555	6.41234	1.86e-06	-1.00566	down
TraesCS2D01G397700	400	115	10.4634	2.66953	3.55e-15	-1.78518	down
TraesCS2D01G400700	63	139	6.4496	14.2436	0.00218755	1.12335	up
TraesCS2D01G404800	27	75	1.07922	3.04789	0.00407926	1.4249	up
TraesCS2D01G406900	50	4	0.804784	0.0682112	1.79e-07	-3.23004	down
TraesCS2D01G407300	477	201	13.6508	5.86657	2.47e-08	-1.24065	down
TraesCS2D01G407800	98	209	0.822822	1.88118	0.000341466	1.08115	up
TraesCS2D01G423400	93	19	1.02497	0.212056	4.62e-08	-2.20539	down
TraesCS2D01G425300	27365	58816	2083.98	4482.57	2.23e-08	1.10383	up
TraesCS2D01G425700	199	403	19.3881	40.4848	3.77e-05	1.01258	up
TraesCS2D01G428400	19	59	0.373915	0.965243	0.00693941	1.5619	up
TraesCS2D01G441200	133	56	1.06825	0.461276	0.000658288	-1.22615	down
TraesCS2D01G442700	198	69	5.0494	1.80536	1.29e-07	-1.50086	down
TraesCS2D01G452300	111	47	4.58301	1.97313	0.00274822	-1.21408	down
TraesCS2D01G455900	98	40	1.67091	0.695785	0.00356042	-1.26184	down
TraesCS2D01G462000	230	51	2.31618	0.532977	4.22e-15	-2.14089	down
TraesCS2D01G462100	214	79	5.00651	1.86146	3.04e-07	-1.42077	down
TraesCS2D01G464200	78	205	1.78352	4.77205	1.17e-06	1.37726	up
TraesCS2D01G468600	544	120	12.2402	2.78867	0	-2.16674	down
TraesCS2D01G468800	0	69	0.0010307	0.833257	7.77e-16	5.56656	up
TraesCS2D01G484700	91	238	0.638159	1.5719	3.01e-07	1.37262	up
TraesCS2D01G500400	153	320	4.41074	9.91676	4.39e-05	1.05727	up
TraesCS2D01G517100	99	16	0.728663	0.121502	2.75e-10	-2.52263	down
TraesCS2D01G518200	403	128	10.5307	3.42363	3.61e-13	-1.64328	down
TraesCS2D01G518300	153	53	3.71347	1.31863	2.13e-06	-1.5035	down
TraesCS2D01G525500	94	190	0.465343	0.945197	0.00228624	1.00387	up
TraesCS2D01G526800	23	67	1.03441	2.923	0.00534816	1.4838	up
TraesCS2D01G535600	25	69	0.29662	0.824191	0.00840215	1.41206	up
TraesCS2D01G541800	81	0	1.3078	0.000315914	0	-5.79337	down
TraesCS2D01G543300	69	24	8.56281	2.99173	0.00500059	-1.46758	down
TraesCS2D01G543900	103	247	11.7223	28.3915	3.38e-06	1.24984	up
TraesCS2D01G547700	568	88	13.7059	2.15574	0	-2.66991	down
TraesCS2D01G557900	878	403	21.7691	10.2389	4.11e-08	-1.12057	down
TraesCS2D01G559700	191	55	7.07392	2.11674	6.95e-10	-1.76876	down
TraesCS2D01G566700	128	6	12.756	0.701255	0	-4.11221	down
TraesCS2D01G571700	443	188	5.31554	2.32978	5.79e-08	-1.23004	down
TraesCS2D01G572900	501	1155	77.3944	173.086	6.28e-10	1.20259	up
TraesCS2D01G575800	750	342	12.7717	5.95391	6.06e-08	-1.12949	down
TraesCS2D01G576600	115	254	1.37237	3.36016	3.46e-05	1.13308	up
TraesCS2D01G581500	59	12	1.97567	0.429178	3.97e-05	-2.16503	down
TraesCS2D01G581700	107	33	1.3529	0.452209	1.04e-05	-1.65339	down
TraesCS2D01G581900	92	35	2.37375	0.937809	0.0018314	-1.35738	down
TraesCS2D01G589600	156	42	8.72031	2.38211	2.63e-09	-1.85657	down
TraesCS2D01G596400	59	129	6.27021	13.8388	0.00421487	1.1092	up
TraesCS2D01G597200	131	314	7.26499	17.7148	4.55e-07	1.25173	up
TraesCS2D01G600100	6975	2120	302.915	94.1201	0	-1.71742	down
TraesCS3A01G007600	165	81	20.2099	10.0522	0.00417369	-1.01317	down
TraesCS3A01G010000	71	16	0.899878	0.203489	1.19e-05	-2.05142	down
TraesCS3A01G023000	2486	1183	58.977	28.4792	2.1e-08	-1.07043	down
TraesCS3A01G023100	558	173	11.571	3.68024	1.22e-15	-1.68098	down
TraesCS3A01G025300	6393	2885	169.69	79.1283	4.58e-10	-1.14751	down
TraesCS3A01G036500	88	186	1.19565	2.74085	0.00088944	1.06704	up
TraesCS3A01G037200	57	10	1.44679	0.260235	1.32e-05	-2.34808	down
TraesCS3A01G040800	4764	2120	206.555	93.5751	1.86e-10	-1.16755	down
TraesCS3A01G043400	4	37	0.0398301	0.309384	0.000138436	2.81021	up
TraesCS3A01G043900	585	288	16.8349	8.5411	5.86e-06	-1.0186	down
TraesCS3A01G044700	417	198	12.2964	5.94843	7.53e-06	-1.06889	down
TraesCS3A01G046000	3585	809	349.001	80.3747	0	-2.14571	down
TraesCS3A01G046400	329	155	5.02596	2.41256	2.28e-05	-1.07855	down
TraesCS3A01G050300	127	47	2.05391	0.737941	6.6e-05	-1.40595	down
TraesCS3A01G050800	151	52	3.73592	1.31084	2.14e-06	-1.51142	down
TraesCS3A01G053300	370	175	10.1964	4.59996	1.29e-05	-1.07375	down
TraesCS3A01G060500	742	148	10.0081	1.59153	0	-2.31428	down
TraesCS3A01G062200	991	131	25.8906	3.77318	0	-2.90519	down
TraesCS3A01G068600	7	38	0.120624	0.586415	0.00272642	2.21801	up
TraesCS3A01G083200	57	16	1.45792	0.431144	0.00203543	-1.74181	down
TraesCS3A01G092800	11060	4949	215.148	98.5243	3.07e-10	-1.1599	down
TraesCS3A01G093000	60	19	0.90043	0.290485	0.00500148	-1.58556	down
TraesCS3A01G094600	196	69	3.60148	1.29643	1.95e-07	-1.48632	down
TraesCS3A01G095900	4986	2210	482.91	213.168	1.4e-10	-1.1733	down
TraesCS3A01G101800	206	95	3.00643	1.41291	0.000242292	-1.10461	down
TraesCS3A01G102800	1148	552	31.9173	15.7044	1.71e-07	-1.05437	down
TraesCS3A01G107000	136	45	4.35162	1.47804	2.75e-06	-1.56439	down
TraesCS3A01G122600	57	8	1.47781	0.233628	1.46e-06	-2.62405	down
TraesCS3A01G125500	505	241	14.7315	7.20919	3.28e-06	-1.06262	down
TraesCS3A01G127100	245	79	7.84842	4.93248	6.99e-10	-1.61468	down
TraesCS3A01G132000	158	75	5.3994	2.64672	0.00259013	-1.06015	down
TraesCS3A01G133400	369	176	17.1428	7.50794	1.77e-05	-1.06171	down
TraesCS3A01G138800	319	59	101.895	18.5893	0	-2.40556	down
TraesCS3A01G141100	719	342	22.1878	10.7851	5.37e-07	-1.06872	down
TraesCS3A01G149000	78	3	3.7512	0.157366	1.88e-14	-4.14679	down
TraesCS3A01G149900	182	56	7.79837	2.51918	1e-08	-1.67436	down
TraesCS3A01G152500	376	170	10.5185	4.88193	2.27e-06	-1.13833	down
TraesCS3A01G152700	206	13	5.70726	0.37754	0	-3.84016	down
TraesCS3A01G158600	23	78	0.258268	0.870933	0.000166908	1.69869	up
TraesCS3A01G163900	256	119	6.0792	2.8976	7.24e-05	-1.09562	down
TraesCS3A01G181400	67	14	2.65354	0.607744	9.93e-06	-2.14475	down
TraesCS3A01G183800	4693	1475	94.1395	29.7324	0	-1.6688	down
TraesCS3A01G184700	39	128	0.487625	1.63015	9.01e-07	1.67727	up
TraesCS3A01G209100	247	582	6.50044	15.6579	8.34e-09	1.23153	up
TraesCS3A01G215400	130	59	2.78284	1.31585	0.00345965	-1.12022	down
TraesCS3A01G217400	150	67	8.65561	3.90089	0.000966496	-1.14529	down
TraesCS3A01G224600	260	107	3.14233	1.29075	1.43e-06	-1.26921	down
TraesCS3A01G231100	307	1218	45.0939	152.256	0	1.98299	up
TraesCS3A01G236200	121	54	4.29458	2.41417	0.00399241	-1.1424	down
TraesCS3A01G240000	844	339	18.444	7.55321	4.2e-11	-1.31218	down
TraesCS3A01G244700	211	45	4.43836	0.990835	7.99e-15	-2.19247	down
TraesCS3A01G254000	55	11	1.79738	0.386793	8.13e-05	-2.17746	down
TraesCS3A01G257500	121	41	0.632184	0.216833	1.7e-05	-1.52753	down
TraesCS3A01G258800	3386	425	42.4064	5.3158	0	-2.98964	down
TraesCS3A01G263300	58	18	1.83513	0.572891	0.00528718	-1.61005	down
TraesCS3A01G263700	37	104	1.07623	3.12887	0.0002013	1.45461	up
TraesCS3A01G280600	426	40	11.0391	1.06845	0	-3.36514	down
TraesCS3A01G281900	179	73	8.41834	3.37485	2.83e-05	-1.27683	down
TraesCS3A01G285900	945	362	9.63328	3.69694	1.3e-12	-1.38068	down
TraesCS3A01G292700	160	40	0.6482	0.161894	2.42e-10	-1.96068	down
TraesCS3A01G297100	5106	2361	126.96	60.8656	2.31e-09	-1.11231	down
TraesCS3A01G303600	1274	521	9.37408	3.78595	1.26e-11	-1.28758	down
TraesCS3A01G305900	293	145	6.90111	3.48126	0.000214359	-1.00743	down
TraesCS3A01G307900	229	485	12.4761	28.0165	2.64e-06	1.07771	up
TraesCS3A01G327100	340	159	6.54501	2.83719	1.45e-05	-1.08937	down
TraesCS3A01G327700	72	27	1.2244	0.466761	0.00956043	-1.36717	down
TraesCS3A01G334000	367	180	5.78322	2.83956	4.82e-05	-1.02175	down
TraesCS3A01G338000	353	102	20.2734	6.05655	3.57e-14	-1.77628	down
TraesCS3A01G338900	1015	309	83.802	25.932	0	-1.71099	down
TraesCS3A01G344400	652	283	8.15249	3.57515	1.18e-08	-1.19979	down
TraesCS3A01G355100	247	112	10.159	4.33597	4.39e-05	-1.13064	down
TraesCS3A01G355400	309	670	24.4281	48.6625	1.79e-07	1.11283	up
TraesCS3A01G360500	2370	4994	133.541	278.699	1.21e-08	1.07483	up
TraesCS3A01G361100	57	18	1.41883	0.466421	0.00738107	-1.58559	down
TraesCS3A01G363900	164	63	3.27933	1.30511	1.36e-05	-1.35963	down
TraesCS3A01G367900	758	274	25.4091	9.51763	2.38e-13	-1.46304	down
TraesCS3A01G368800	194	79	6.18019	2.56071	1.35e-05	-1.28024	down
TraesCS3A01G374000	1864	768	70.7159	29.8363	4.72e-12	-1.27758	down
TraesCS3A01G374600	57	10	1.44934	0.26203	1.32e-05	-2.34808	down
TraesCS3A01G374700	338	96	5.0706	1.4669	3.46e-14	-1.80007	down
TraesCS3A01G389800	165	71	3.09186	1.63089	0.000207592	-1.19961	down
TraesCS3A01G390300	849	216	47.0174	11.9533	0	-1.96736	down
TraesCS3A01G390400	115	5	16.6935	0.768253	0	-4.1664	down
TraesCS3A01G403500	48	186	0.39556	1.4222	4.04e-11	1.92166	up
TraesCS3A01G420600	21	63	0.365221	0.927239	0.00610503	1.5199	up
TraesCS3A01G424700	55	14	1.09988	0.300659	0.0010033	-1.86684	down
TraesCS3A01G426700	109	302	2.76669	8.97948	3.09e-09	1.45776	up
TraesCS3A01G434300	146	39	13.5557	3.7093	6.24e-09	-1.86505	down
TraesCS3A01G438800	37	105	0.621023	1.77044	0.000154401	1.46823	up
TraesCS3A01G438900	654	288	28.5962	12.8793	2.33e-08	-1.17907	down
TraesCS3A01G444000	1444	634	25.8485	11.4323	5.58e-10	-1.18562	down
TraesCS3A01G447600	92	0	0.690067	1.64e-05	0	-5.97397	down
TraesCS3A01G452400	52	10	1.14788	0.227309	0.00011122	-2.21915	down
TraesCS3A01G459000	72	22	2.65024	0.846528	0.000620946	-1.64561	down
TraesCS3A01G471100	181	70	5.28634	2.06717	6.32e-06	-1.35204	down
TraesCS3A01G471700	697	99	28.8789	4.24567	0	-2.79722	down
TraesCS3A01G488200	158	16	11.1588	1.15736	0	-3.18906	down
TraesCS3A01G488300	39	4	1.49012	0.138924	4.98e-05	-2.88329	down
TraesCS3A01G492300	375	73	5.022	0.992873	0	-2.33753	down
TraesCS3A01G494000	273	83	5.34347	1.89842	1.72e-11	-1.69993	down
TraesCS3A01G494400	149	68	3.78403	1.74166	0.00160625	-1.11482	down
TraesCS3A01G495400	407	162	5.05208	2.08402	7.72e-09	-1.32111	down
TraesCS3A01G498700	64	14	1.68614	0.389159	3.2e-05	-2.08013	down
TraesCS3A01G508600	906	290	33.3458	10.9038	0	-1.63844	down
TraesCS3A01G508700	69	17	2.31077	0.493462	5.56e-05	-1.93083	down
TraesCS3A01G512600	93	221	1.59099	3.75348	1.13e-05	1.23553	up
TraesCS3A01G512700	415	987	8.29534	19.8007	2.22e-10	1.24695	up
TraesCS3A01G516300	151	74	12.9345	6.5136	0.00655236	-1.01438	down
TraesCS3A01G521700	551	134	5.4362	0.894924	0	-2.02778	down
TraesCS3A01G521900	556	165	3.90096	1.18954	1.11e-16	-1.74353	down
TraesCS3A01G523500	43	138	0.740273	2.36861	5.74e-07	1.64867	up
TraesCS3A01G525100	117	54	7.71299	3.48631	0.00903036	-1.0945	down
TraesCS3A01G529400	96	33	4.55918	1.40633	0.000234152	-1.49915	down
TraesCS3A01G533200	89	36	1.67789	0.660501	0.00612767	-1.27131	down
TraesCS3A01G536300	57	126	0.320322	0.702355	0.00396888	1.12416	up
TraesCS3A01G537100	69	22	1.46716	0.483843	0.00162623	-1.58548	down
TraesCS3B01G002500	47	10	3.20211	0.673203	0.000907922	-2.07756	down
TraesCS3B01G022000	146	38	3.45037	0.916833	3.27e-09	-1.90113	down
TraesCS3B01G037000	127	46	14.5446	5.32482	4.19e-05	-1.43601	down
TraesCS3B01G038700	143	66	15.2212	7.09191	0.00264463	-1.09825	down
TraesCS3B01G039100	139	62	5.88633	2.69098	0.0015761	-1.1459	down
TraesCS3B01G042700	189	27	10.9189	1.64706	0	-2.7413	down
TraesCS3B01G043600	30	81	0.379929	0.987817	0.00332566	1.3894	up
TraesCS3B01G045200	69	185	0.475164	1.37786	1.9e-06	1.40364	up
TraesCS3B01G053700	177	73	2.14287	1.04864	4.16e-05	-1.26075	down
TraesCS3B01G062700	573	82	95.5978	13.5796	0	-2.78265	down
TraesCS3B01G063200	172	26	81.6822	12.059	0	-2.65799	down
TraesCS3B01G067900	88	195	1.78858	3.85055	0.000200079	1.13468	up
TraesCS3B01G075300	30	87	0.35777	1.18122	0.000616406	1.4907	up
TraesCS3B01G086500	126	254	0.513366	0.824961	0.000498304	1.0029	up
TraesCS3B01G088800	59	17	2.44425	0.726952	0.00197798	-1.7101	down
TraesCS3B01G110100	126	27	2.31375	0.510279	4.77e-10	-2.16196	down
TraesCS3B01G113100	49	12	1.73123	0.452286	0.00214499	-1.90432	down
TraesCS3B01G125500	208	71	7.10423	2.44068	3.81e-08	-1.53106	down
TraesCS3B01G128700	328	18	9.23306	0.630822	0	-4.07961	down
TraesCS3B01G137300	1217	2446	24.3822	49.0971	2.76e-07	1.00621	up
TraesCS3B01G137400	271	55	8.86556	1.83845	0	-2.27019	down
TraesCS3B01G140700	110	40	3.90357	1.46741	0.000178948	-1.42614	down
TraesCS3B01G141500	280	115	6.28558	2.66026	6.99e-07	-1.2729	down
TraesCS3B01G141800	47	0	2.15876	0	1.88e-10	-5.02681	down
TraesCS3B01G142200	664	288	4.94606	2.11301	1.02e-08	-1.20091	down
TraesCS3B01G144500	153	51	5.24439	2.2995	8.2e-07	-1.55745	down
TraesCS3B01G144600	465	166	13.8848	5.08634	1.55e-11	-1.47779	down
TraesCS3B01G151000	9	42	0.518457	2.29304	0.00305374	2.05195	up
TraesCS3B01G154000	1919	908	45.4527	22.2618	2.18e-08	-1.07835	down
TraesCS3B01G180200	110	45	0.847235	0.350018	0.00158118	-1.26197	down
TraesCS3B01G197000	304	6	7.34931	0.162131	0	-5.35052	down
TraesCS3B01G209100	50	14	4.20602	1.22494	0.00640297	-1.73313	down
TraesCS3B01G213000	1151	388	46.3872	15.5201	0	-1.5651	down
TraesCS3B01G213400	409	199	4.26316	2.3918	2.06e-05	-1.03383	down
TraesCS3B01G213600	3433	787	66.954	15.6019	0	-2.12294	down
TraesCS3B01G232200	135	57	2.62311	0.996096	0.000622918	-1.22257	down
TraesCS3B01G254100	281	82	3.91697	1.14712	2.26e-12	-1.75856	down
TraesCS3B01G259300	1401	568	61.98	24.4455	4.83e-12	-1.30025	down
TraesCS3B01G260400	325	944	4.60766	62.3309	1.89e-15	1.53403	up
TraesCS3B01G270500	206	95	6.42386	2.73608	0.000242292	-1.10461	down
TraesCS3B01G283900	239	105	7.37659	3.28194	2.17e-05	-1.17528	down
TraesCS3B01G287600	71	154	0.351843	0.794126	0.00161498	1.101	up
TraesCS3B01G290300	237	95	1.25877	0.502321	1.41e-06	-1.3055	down
TraesCS3B01G297800	107	313	10.2021	30.5142	2.45e-10	1.53548	up
TraesCS3B01G313600	83	18	2.43493	0.534513	7.47e-07	-2.1162	down
TraesCS3B01G314000	149	71	1.13045	0.505261	0.00397651	-1.05384	down
TraesCS3B01G314300	178	17	4.03968	0.406136	0	-3.27927	down
TraesCS3B01G314400	50	4	4.37791	0.373194	1.79e-07	-3.23004	down
TraesCS3B01G315600	255	118	10.3931	4.51078	6.49e-05	-1.10203	down
TraesCS3B01G317300	359	178	5.43717	2.71596	7.82e-05	-1.00607	down
TraesCS3B01G324500	77	29	0.654187	0.253666	0.00620148	-1.36425	down
TraesCS3B01G324700	45	4	0.863919	0.0732331	2.3e-06	-3.08266	down
TraesCS3B01G332700	1727	778	13.1669	5.91871	1.54e-09	-1.14891	down
TraesCS3B01G339300	67	12	1.56751	0.27875	1.51e-06	-2.34423	down
TraesCS3B01G349600	146	338	1.43387	3.6424	8.94e-07	1.20277	up
TraesCS3B01G354100	184	58	8.46444	2.72609	1.73e-08	-1.64067	down
TraesCS3B01G356400	76	26	3.9829	1.38668	0.0018054	-1.49519	down
TraesCS3B01G356700	3494	1329	37.2372	14.2576	3.44e-15	-1.39354	down
TraesCS3B01G359400	71	25	1.03248	0.360565	0.00467357	-1.45243	down
TraesCS3B01G362800	405	194	12.0686	5.85685	1.23e-05	-1.05614	down
TraesCS3B01G366100	61	18	0.406773	0.120584	0.0019139	-1.68103	down
TraesCS3B01G375100	1428	701	35.0485	17.5139	2.91e-07	-1.02495	down
TraesCS3B01G377300	995	2030	66.1413	134.124	1.47e-07	1.02761	up
TraesCS3B01G378200	120	34	3.23648	0.955249	4.4e-07	-1.77543	down
TraesCS3B01G380200	61	16	2.1747	0.572159	0.000482326	-1.83725	down
TraesCS3B01G380400	111	20	4.78339	0.887624	1.73e-10	-2.3882	down
TraesCS3B01G383900	54	6	1.691	0.203068	4.68e-07	-2.88963	down
TraesCS3B01G389100	40	4	2.76064	0.294325	2.98e-05	-2.91849	down
TraesCS3B01G395900	12186	5038	98.7581	40.842	1.03e-12	-1.27405	down
TraesCS3B01G396100	187	66	3.80049	1.3902	3.61e-07	-1.48178	down
TraesCS3B01G400800	282	131	8.69381	4.12615	3.79e-05	-1.09743	down
TraesCS3B01G402200	363	166	13.1452	6.00711	4.33e-06	-1.12182	down
TraesCS3B01G406200	3231	1292	89.229	37.5855	1.57e-13	-1.32138	down
TraesCS3B01G409100	52	11	1.80625	0.410485	0.000279639	-2.09873	down
TraesCS3B01G412500	353	97	8.89898	2.48889	3.77e-15	-1.84772	down
TraesCS3B01G414500	69	0	1.19405	0.0103124	7.77e-16	-5.56656	down
TraesCS3B01G417500	130	62	2.64703	1.28103	0.00887851	-1.05038	down
TraesCS3B01G420600	85	191	1.6833	4.51669	0.000161703	1.1542	up
TraesCS3B01G422300	747	63	27.1607	2.34166	0	-3.53689	down
TraesCS3B01G429900	121	29	1.36951	0.345056	1.1e-08	-2.00635	down
TraesCS3B01G431200	115	36	2.0271	0.584297	5.96e-06	-1.6357	down
TraesCS3B01G434700	95	32	2.50352	0.844954	0.00018311	-1.52672	down
TraesCS3B01G438400	58	18	0.513385	0.170574	0.00528718	-1.61005	down
TraesCS3B01G443000	75	164	0.531057	0.854606	0.000895688	1.11343	up
TraesCS3B01G451800	237	506	316.476	607.736	1.51e-06	1.08946	up
TraesCS3B01G457400	892	398	14.4252	6.68329	9.01e-09	-1.1613	down
TraesCS3B01G457600	3623	1322	53.2673	19.0549	2.22e-16	-1.45343	down
TraesCS3B01G459600	40	6	2.32468	0.378369	0.000376144	-2.47015	down
TraesCS3B01G462900	74	174	1.80541	4.29501	0.000103553	1.21706	up
TraesCS3B01G465200	256	95	10.401	3.93321	5.23e-08	-1.41609	down
TraesCS3B01G465900	181	84	7.46977	3.49206	0.000663462	-1.09401	down
TraesCS3B01G469600	388	155	38.0885	15.5928	1.37e-08	-1.31553	down
TraesCS3B01G472800	348	124	31.1913	11.2928	3.68e-10	-1.4777	down
TraesCS3B01G489700	46	3	0.965556	0.0827948	2.71e-07	-3.40361	down
TraesCS3B01G490700	127	382	1.67231	5.02433	5.97e-12	1.57755	up
TraesCS3B01G496100	223	80	13.4031	5.35826	7.92e-08	-1.46199	down
TraesCS3B01G496500	562	267	34.9007	16.7932	1.59e-06	-1.06953	down
TraesCS3B01G501000	79	29	1.38701	0.476475	0.00355965	-1.40055	down
TraesCS3B01G514800	774	146	27.8645	5.14538	0	-2.39451	down
TraesCS3B01G520500	143	37	1.4915	0.400117	3.98e-09	-1.90849	down
TraesCS3B01G526600	525	117	21.451	4.88961	0	-2.15167	down
TraesCS3B01G529300	4305	1621	181.107	70.0681	1.11e-15	-1.4083	down
TraesCS3B01G535300	108	43	8.33424	3.36255	0.00111651	-1.2993	down
TraesCS3B01G536100	78	8	5.40845	0.594086	1.08e-10	-3.06665	down
TraesCS3B01G540200	63	19	4.88868	1.54926	0.00184517	-1.65428	down
TraesCS3B01G545900	99	20	4.73353	1.32968	1.28e-08	-2.22546	down
TraesCS3B01G549200	849	324	9.94529	3.77835	2.2e-12	-1.38569	down
TraesCS3B01G550300	84	19	2.56178	0.594988	1.19e-06	-2.06098	down
TraesCS3B01G559300	483	139	19.8085	4.20698	1.11e-16	-1.78602	down
TraesCS3B01G561800	146	63	4.31185	1.89453	0.000552245	-1.1935	down
TraesCS3B01G562500	362	143	7.0546	2.71481	1.63e-08	-1.33096	down
TraesCS3B01G574600	165	79	6.02836	2.95631	0.00241594	-1.04858	down
TraesCS3B01G578200	2046	4710	112.451	265.748	3.62e-11	1.20233	up
TraesCS3B01G592000	494	182	12.8907	4.80971	3.74e-11	-1.43317	down
TraesCS3B01G609400	69	24	1.0782	0.377477	0.00500059	-1.46758	down
TraesCS3B01G611600	119	22	4.70651	0.58709	6.67e-11	-2.35893	down
TraesCS3D01G017700	303	128	7.51591	2.92337	9.52e-07	-1.23357	down
TraesCS3D01G023600	8	48	0.0850957	0.490187	8.47e-05	2.38298	up
TraesCS3D01G034200	71	12	8.22239	1.47642	2.9e-07	-2.42612	down
TraesCS3D01G036200	120	48	5.0755	2.06903	0.000525715	-1.29567	down
TraesCS3D01G036600	283	136	21.2253	10.464	0.000106353	-1.04907	down
TraesCS3D01G037000	86	29	8.0747	2.83329	0.000482591	-1.52086	down
TraesCS3D01G037800	51	0	0.837747	0.00012183	1.86e-11	-5.14117	down
TraesCS3D01G039300	3300	1534	154.692	73.958	3.88e-09	-1.10442	down
TraesCS3D01G039400	494	67	25.0503	3.54001	0	-2.85494	down
TraesCS3D01G041400	255	568	17.7012	40.3329	1.28e-07	1.15078	up
TraesCS3D01G048400	124	34	1.806	0.503556	1.37e-07	-1.82217	down
TraesCS3D01G050300	165	37	3.2916	0.832942	7.2e-12	-2.11296	down
TraesCS3D01G060400	401	851	2.4519	5.37603	1.72e-07	1.08274	up
TraesCS3D01G061900	1440	239	27.9326	4.68184	0	-2.58353	down
TraesCS3D01G072100	107	237	1.01921	2.2842	5.16e-05	1.13639	up
TraesCS3D01G094800	260	64	6.03195	1.42703	1.35e-14	-1.99745	down
TraesCS3D01G097900	676	309	33.3928	15.4764	1.13e-07	-1.12566	down
TraesCS3D01G099400	124	52	2.68612	1.13793	0.00102718	-1.23027	down
TraesCS3D01G102200	50	8	1.42361	0.229254	3.45e-05	-2.44014	down
TraesCS3D01G102300	839	138	23.0473	3.86979	0	-2.59109	down
TraesCS3D01G104000	157	60	2.29526	0.895401	1.82e-05	-1.36601	down
TraesCS3D01G109000	651	297	15.8123	7.18577	1.26e-07	-1.12828	down
TraesCS3D01G109100	916	318	32.9242	11.5552	4e-15	-1.52193	down
TraesCS3D01G111300	127	7	4.03691	0.24381	0	-3.92017	down
TraesCS3D01G124200	205	95	3.8934	1.84204	0.000284273	-1.09764	down
TraesCS3D01G124500	365	37	11.4749	1.13954	0	-3.25131	down
TraesCS3D01G133900	758	360	38.8511	14.0454	4e-07	-1.07108	down
TraesCS3D01G134800	14	68	1.00656	4.93288	6.72e-06	2.16566	up
TraesCS3D01G141100	927	1897	55.1088	113.474	1.37e-07	1.0319	up
TraesCS3D01G142500	26	77	2.79654	7.78267	0.00134006	1.51369	up
TraesCS3D01G143200	45	1	1.52188	0.037782	8.5e-09	-4.22417	down
TraesCS3D01G148300	112	27	3.67701	0.909052	4.4e-08	-1.99414	down
TraesCS3D01G170300	127	50	5.88081	2.36912	0.000239051	-1.31934	down
TraesCS3D01G170400	198	92	5.91085	2.77855	0.000381962	-1.09345	down
TraesCS3D01G188000	2685	501	51.9795	9.97212	0	-2.41856	down
TraesCS3D01G194300	130	42	3.49677	1.14195	2.73e-06	-1.59626	down
TraesCS3D01G203800	131	63	3.64365	1.78988	0.00993254	-1.03877	down
TraesCS3D01G212000	158	379	4.10002	10.0441	9.41e-08	1.25441	up
TraesCS3D01G214000	47	108	4.37954	13.5489	0.00535548	1.17508	up
TraesCS3D01G225800	96	41	2.04017	0.880514	0.00851082	-1.19818	down
TraesCS3D01G228400	84	17	1.68964	0.39238	2.16e-07	-2.20917	down
TraesCS3D01G229000	74	0	1.01891	0.000277679	0	-5.66543	down
TraesCS3D01G230200	264	114	5.83574	2.60066	5.96e-06	-1.20091	down
TraesCS3D01G231600	57	8	0.657249	0.0904345	1.46e-06	-2.62405	down
TraesCS3D01G242500	273	97	8.43051	3.07322	5.53e-09	-1.47873	down
TraesCS3D01G254900	242	51	7.75435	1.67459	2.22e-16	-2.21381	down
TraesCS3D01G257500	125	39	0.674198	0.210962	2.04e-06	-1.64345	down
TraesCS3D01G263000	144	33	2.5571	0.627807	1.8e-10	-2.07676	down
TraesCS3D01G265600	79	166	0.646802	1.45243	0.00203804	1.05722	up
TraesCS3D01G275300	9	43	0.288746	2.54083	0.00200036	2.08475	up
TraesCS3D01G277600	131	54	8.19974	3.32143	0.000477739	-1.25562	down
TraesCS3D01G279400	115	41	3.2953	1.19646	8.02e-05	-1.45507	down
TraesCS3D01G279500	658	173	19.3167	5.16618	0	-1.91822	down
TraesCS3D01G280400	211	8	5.33744	0.205204	0	-4.48523	down
TraesCS3D01G281900	158	74	7.49521	3.61757	0.00193536	-1.07914	down
TraesCS3D01G283500	1537	681	24.2206	10.9924	7.87e-10	-1.17264	down
TraesCS3D01G285000	33	83	0.382439	1.53742	0.00774951	1.29267	up
TraesCS3D01G295400	124	19	4.76189	0.752886	5.78e-13	-2.61474	down
TraesCS3D01G298200	1450	635	11.8059	5.11882	4.73e-10	-1.18933	down
TraesCS3D01G299200	78	3	1.09303	0.0536266	1.88e-14	-4.14679	down
TraesCS3D01G304900	254	48	5.65955	0.999369	0	-2.36812	down
TraesCS3D01G305300	1577	694	64.077	29.0572	4.87e-10	-1.18245	down
TraesCS3D01G320400	123	52	6.67289	2.83162	0.00127692	-1.21873	down
TraesCS3D01G320500	153	29	4.67044	0.888861	4.5e-13	-2.34121	down
TraesCS3D01G320700	5444	2446	59.3387	26.8194	3.43e-10	-1.15376	down
TraesCS3D01G321800	108	27	2.42706	0.612495	1.59e-07	-1.94237	down
TraesCS3D01G325300	821	1929	13.3289	30.6333	3.48e-11	1.2309	up
TraesCS3D01G337900	362	174	4.67635	2.26591	2.59e-05	-1.05054	down
TraesCS3D01G342100	55	17	2.31257	0.702829	0.00783444	-1.61139	down
TraesCS3D01G349100	150	63	6.59887	2.61987	0.000247047	-1.23211	down
TraesCS3D01G350700	221	80	11.1532	4.08358	1.16e-07	-1.44908	down
TraesCS3D01G356900	1356	453	32.018	10.7108	0	-1.57863	down
TraesCS3D01G358500	8183	4052	179.856	91.4234	1.95e-07	-1.01373	down
TraesCS3D01G362100	231	99	4.14632	1.67882	1.35e-05	-1.21014	down
TraesCS3D01G364300	144	53	4.28059	1.62617	1.73e-05	-1.4169	down
TraesCS3D01G365400	0	42	0.000265796	0.963163	3.54e-09	4.86979	up
TraesCS3D01G366700	3936	1621	95.2723	40.0956	9.85e-13	-1.27907	down
TraesCS3D01G367200	44	5	1.09759	0.147806	1.58e-05	-2.80977	down
TraesCS3D01G367300	38	4	0.862225	0.0969153	8.3e-05	-2.84721	down
TraesCS3D01G369600	55	6	4.81619	0.617461	2.89e-07	-2.9154	down
TraesCS3D01G372900	80	31	3.57241	1.4121	0.00697656	-1.3267	down
TraesCS3D01G373700	129	53	3.08959	1.39555	0.000503791	-1.25992	down
TraesCS3D01G375000	158	70	2.64713	1.19531	0.000561646	-1.15768	down
TraesCS3D01G378300	134	40	3.04153	0.967731	3.11e-07	-1.70742	down
TraesCS3D01G379400	182	89	4.09913	2.18226	0.00221244	-1.01989	down
TraesCS3D01G379900	920	296	7.39415	2.41621	0	-1.63114	down
TraesCS3D01G380100	703	243	11.9195	4.15514	3.66e-14	-1.52681	down
TraesCS3D01G382600	136	11	20.2654	1.72843	0	-3.46076	down
TraesCS3D01G390100	457	1654	35.8609	129.886	0	1.8523	up
TraesCS3D01G390900	95	37	7.84744	2.8251	0.00208245	-1.32596	down
TraesCS3D01G393200	4366	10273	52.1231	122.257	7.5e-12	1.23419	up
TraesCS3D01G399100	64	135	0.773913	1.63009	0.00638492	1.05948	up
TraesCS3D01G403300	64	1	2.6245	0.117231	2.33e-13	-4.71854	down
TraesCS3D01G417600	142	309	6.00755	13.4501	1.47e-05	1.11361	up
TraesCS3D01G421600	59	148	1.43393	3.64341	8.43e-05	1.30532	up
TraesCS3D01G425300	195	485	9.06058	22.982	2.67e-09	1.30797	up
TraesCS3D01G425600	49	147	1.44654	4.42803	1.32e-06	1.55635	up
TraesCS3D01G427500	120	36	12.356	3.80637	1.47e-06	-1.69633	down
TraesCS3D01G428100	120	306	21.6245	55.2064	6.02e-08	1.33972	up
TraesCS3D01G440600	219	492	3.61192	8.21568	2.12e-07	1.16232	up
TraesCS3D01G445700	12	90	0.152419	1.12259	1.12e-10	2.76197	up
TraesCS3D01G464600	59	16	1.16014	0.313818	0.000994447	-1.79032	down
TraesCS3D01G472000	899	1874	7.98478	15.568	4.97e-08	1.05849	up
TraesCS3D01G473000	51	112	2.04897	4.4766	0.00927674	1.11249	up
TraesCS3D01G478700	95	270	0.803818	2.27788	4.43e-09	1.49247	up
TraesCS3D01G483200	187	406	7.88274	17.462	2.79e-06	1.11229	up
TraesCS3D01G484900	47	174	5.64812	20.9574	4.82e-10	1.85569	up
TraesCS3D01G492500	359	154	26.3031	11.6234	4.37e-07	-1.21315	down
TraesCS3D01G494400	421	866	5.31534	10.6719	7.21e-07	1.03793	up
TraesCS3D01G495800	103	209	3.93868	8.20435	0.00122735	1.01041	up
TraesCS3D01G497900	8	45	0.533214	3.77956	0.00032304	2.29276	up
TraesCS3D01G501900	142	14	4.39535	0.459045	0	-3.21176	down
TraesCS3D01G507500	24	81	0.220917	0.874782	0.000119861	1.69439	up
TraesCS3D01G514400	51	11	1.56529	0.362834	0.000420949	-2.0715	down
TraesCS3D01G515400	98	288	0.5588	1.54169	5.84e-10	1.54092	up
TraesCS3D01G522400	386	951	74.9203	178.606	3.67e-11	1.29755	up
TraesCS3D01G524600	24	68	0.358429	1.00359	0.00674288	1.44697	up
TraesCS3D01G531400	309	129	14.6592	6.63236	5.33e-07	-1.25062	down
TraesCS3D01G534800	78	21	1.98853	0.561533	4.4e-05	-1.82161	down
TraesCS3D01G536700	81	302	9.54154	35.0901	2.22e-14	1.87939	up
TraesCS3D01G539900	773	291	17.855	6.87324	2.06e-12	-1.40487	down
TraesCS3D01G540900	11	52	1.0159	4.58131	0.000279639	2.09873	up
TraesCS4A01G005500	380	180	20.2753	9.7766	1.17e-05	-1.07177	down
TraesCS4A01G005700	163	56	1.55354	0.541695	8.41e-07	-1.51666	down
TraesCS4A01G007400	131	32	3.54583	0.894285	4.41e-09	-1.98417	down
TraesCS4A01G017000	200	568	19.8377	56.9428	9.12e-13	1.49897	up
TraesCS4A01G019800	537	237	24.2992	11.0363	8.43e-08	-1.175	down
TraesCS4A01G020000	956	434	20.4511	9.4403	1.64e-08	-1.13662	down
TraesCS4A01G020100	178	58	4.47189	1.44031	6.89e-08	-1.59323	down
TraesCS4A01G022700	2835	1228	36.4702	16.5442	4.91e-11	-1.20605	down
TraesCS4A01G025900	85	193	1.28774	3.43595	0.000114459	1.16912	up
TraesCS4A01G032100	326	153	12.99	6.30424	2.12e-05	-1.08395	down
TraesCS4A01G041700	93	16	1.1715	0.210482	2.75e-09	-2.43381	down
TraesCS4A01G042700	77	205	3.23696	8.75761	8.04e-07	1.39552	up
TraesCS4A01G053500	590	282	5.28345	2.56188	1.63e-06	-1.06106	down
TraesCS4A01G059400	211	104	6.48216	3.21111	0.00116795	-1.01031	down
TraesCS4A01G059800	2560	244	66.961	6.31764	0	-3.38326	down
TraesCS4A01G061700	122	44	17.4066	6.21435	5.68e-05	-1.44083	down
TraesCS4A01G061800	116	6	3.55688	0.217367	0	-3.97191	down
TraesCS4A01G061900	6233	1684	195.72	54.292	0	-1.88711	down
TraesCS4A01G063800	359	172	12.2065	5.95108	2.42e-05	-1.05512	down
TraesCS4A01G065300	335	108	5.43327	1.72047	9.12e-12	-1.61979	down
TraesCS4A01G070700	761	151	21.2533	3.53607	0	-2.32202	down
TraesCS4A01G070800	323	91	5.07751	1.38547	5.28e-14	-1.81083	down
TraesCS4A01G082800	52	3	0.709006	0.0511736	1.15e-08	-3.57527	down
TraesCS4A01G083700	1201	537	11.0418	4.92991	2.99e-09	-1.15904	down
TraesCS4A01G088000	95	32	1.3121	0.454659	0.00018311	-1.52672	down
TraesCS4A01G094500	367	178	11.8861	5.65097	3.28e-05	-1.03773	down
TraesCS4A01G094700	36	6	2.88368	0.514161	0.00246855	-2.32388	down
TraesCS4A01G107400	129	59	5.63541	2.70457	0.00421487	-1.1092	down
TraesCS4A01G109900	247	17	4.88525	0.355732	0	-3.74856	down
TraesCS4A01G113900	67	8	2.60176	0.320404	1.56e-08	-2.85176	down
TraesCS4A01G114400	31	79	3.72004	9.63298	0.00909629	1.30888	up
TraesCS4A01G115400	98	31	5.66871	1.89121	4.46e-05	-1.61464	down
TraesCS4A01G117000	83	27	3.93411	1.30524	0.000387255	-1.56841	down
TraesCS4A01G118300	155	66	7.99383	3.49855	0.000261768	-1.21336	down
TraesCS4A01G133800	185	74	1.96615	0.793618	1.27e-05	-1.30477	down
TraesCS4A01G172200	297	144	14.2452	7.0135	0.000105778	-1.03678	down
TraesCS4A01G173800	127	20	7.11036	1.19038	5.6e-13	-2.58007	down
TraesCS4A01G181900	393	179	18.4607	8.50594	2.24e-06	-1.12808	down
TraesCS4A01G186700	244	73	2.88212	0.861878	5.34e-11	-1.72058	down
TraesCS4A01G201800	695	248	10.9861	4.00329	2.51e-13	-1.48113	down
TraesCS4A01G205100	191	85	3.23461	1.47985	0.000161703	-1.1542	down
TraesCS4A01G205800	0	55	9.33e-05	1.13438	1.89e-12	5.24713	up
TraesCS4A01G212000	324	63	25.1784	3.85362	0	-2.33551	down
TraesCS4A01G214300	62	15	3.22956	0.813345	0.00015612	-1.94511	down
TraesCS4A01G235800	321	25	12.8313	1.02653	0	-3.60587	down
TraesCS4A01G250400	353	86	1082.12	234.824	0	-2.01859	down
TraesCS4A01G250500	145	21	50.8636	7.24387	2.78e-15	-2.70359	down
TraesCS4A01G256500	229	20	6.79646	0.63292	0	-3.42313	down
TraesCS4A01G257300	58	19	2.37332	0.82149	0.00960028	-1.53785	down
TraesCS4A01G260500	320	122	13.1503	5.11372	1.34e-08	-1.3804	down
TraesCS4A01G262900	441	144	2.40315	0.789304	4e-13	-1.60474	down
TraesCS4A01G265000	70	17	4.04738	0.994637	3.86e-05	-1.95115	down
TraesCS4A01G280700	523	163	9.09688	2.91717	3.89e-15	-1.67293	down
TraesCS4A01G282900	237	113	1.74817	0.83126	0.000244914	-1.05872	down
TraesCS4A01G284400	79	165	3.33052	7.29137	0.00241594	1.04858	up
TraesCS4A01G290800	167	77	17.6963	8.26234	0.000959235	-1.10211	down
TraesCS4A01G298400	163	73	5.51662	2.57516	0.000578214	-1.14291	down
TraesCS4A01G299000	81	16	2.54473	0.525604	2.71e-07	-2.23786	down
TraesCS4A01G299100	4287	602	2222.01	74.6584	0	-2.82907	down
TraesCS4A01G304400	249	13	5.84668	0.331011	0	-4.11187	down
TraesCS4A01G305700	316	144	2.62638	1.40582	9.55e-06	-1.12581	down
TraesCS4A01G323800	214	104	15.4395	6.72162	0.000751118	-1.03053	down
TraesCS4A01G326400	132	31	7.76212	1.8879	1.58e-09	-2.03875	down
TraesCS4A01G327000	522	242	7.22727	3.06112	8.34e-07	-1.10431	down
TraesCS4A01G339800	231	21	6.61882	0.672074	0	-3.36997	down
TraesCS4A01G347300	2495	1184	193.635	91.6144	1.77e-08	-1.07442	down
TraesCS4A01G349700	148	35	11.1887	2.68413	2.36e-10	-2.03456	down
TraesCS4A01G368600	1711	406	52.2221	12.7682	0	-2.07127	down
TraesCS4A01G369300	37	7	3.08686	0.617567	0.00427107	-2.181	down
TraesCS4A01G384300	66	14	0.36319	0.0813168	1.47e-05	-2.12353	down
TraesCS4A01G384700	422	900	8.59962	18.6768	1.08e-07	1.08999	up
TraesCS4A01G384800	274	577	1.15154	2.41734	1.37e-06	1.0703	up
TraesCS4A01G389400	130	281	0.768598	1.46106	3.41e-05	1.10326	up
TraesCS4A01G389900	1768	860	498.94	237.371	1.19e-07	-1.03843	down
TraesCS4A01G398700	143	302	3.87858	8.03129	4.53e-05	1.07069	up
TraesCS4A01G405800	169	83	5.11643	2.7983	0.00369115	-1.01286	down
TraesCS4A01G435300	194	68	16.1144	5.54651	1.94e-07	-1.49225	down
TraesCS4A01G436200	81	21	2.96482	0.791627	1.58e-05	-1.87506	down
TraesCS4A01G436400	135	28	4.89379	1.05154	5.93e-11	-2.2106	down
TraesCS4A01G439000	113	48	3.02237	1.19891	0.00256669	-1.21006	down
TraesCS4A01G442400	128	42	6.97446	2.33035	4.6e-06	-1.57414	down
TraesCS4A01G458000	86	29	1.69947	0.505462	0.000482591	-1.52086	down
TraesCS4A01G472100	48	0	1.09688	0.00166323	1.05e-10	-5.05626	down
TraesCS4A01G475800	89	189	1.98907	4.11242	0.000718112	1.07391	up
TraesCS4A01G483900	307	143	5.62813	2.38077	2.4e-05	-1.09427	down
TraesCS4A01G495900	137	59	4.07179	1.80871	0.000843266	-1.19505	down
TraesCS4A01G498000	30747	13457	2174.06	968.46	1.47e-10	-1.192	down
TraesCS4B01G000500	141	328	2.71666	5.63415	9.45e-07	1.20939	up
TraesCS4B01G001800	82	3	4.02925	0.188575	2.66e-15	-4.21763	down
TraesCS4B01G002900	57	209	2.3533	8.54295	2.91e-11	1.84754	up
TraesCS4B01G003000	144	319	1.94531	3.65991	6.48e-06	1.13937	up
TraesCS4B01G003100	142	327	1.56352	3.68053	1.39e-06	1.19491	up
TraesCS4B01G003400	273	1303	8.30118	38.5355	0	2.24867	up
TraesCS4B01G003600	220	957	14.3005	61.9158	0	2.11354	up
TraesCS4B01G005200	9	72	0.085467	0.650211	6.03e-09	2.80885	up
TraesCS4B01G005900	8	59	0.19733	1.41648	5.91e-07	2.67256	up
TraesCS4B01G006600	1337	148	54.7892	6.80624	0	-3.16251	down
TraesCS4B01G006800	154	11	3.65175	0.290038	0	-3.63826	down
TraesCS4B01G007000	54	0	0.378187	0	3.35e-12	-5.22136	down
TraesCS4B01G007400	1506	553	7.67337	2.82574	5.11e-15	-1.44292	down
TraesCS4B01G009500	523	3079	3.12776	18.5376	0	2.55418	up
TraesCS4B01G009800	47	185	1.92728	7.64223	2.79e-11	1.9434	up
TraesCS4B01G009900	28	98	0.49463	1.70765	7.28e-06	1.75442	up
TraesCS4B01G013100	418	999	22.1074	53.7106	1.58e-10	1.254	up
TraesCS4B01G014500	373	127	17.3988	6.05679	2.32e-11	-1.54329	down
TraesCS4B01G017500	314	28	6.60296	0.616899	0	-3.41941	down
TraesCS4B01G022300	199	96	1.53336	0.774881	0.000953128	-1.04022	down
TraesCS4B01G023200	208	103	21.1469	10.6933	0.00142145	-1.00353	down
TraesCS4B01G023500	203	85	5.3843	2.27537	1.98e-05	-1.24145	down
TraesCS4B01G033300	1529	758	82.7768	41.6431	4.26e-07	-1.01089	down
TraesCS4B01G038800	300	68	13.6838	3.27447	0	-2.11728	down
TraesCS4B01G044100	139	66	2.97123	1.4595	0.00555568	-1.05775	down
TraesCS4B01G047100	323	149	5.94908	2.79921	1.25e-05	-1.10852	down
TraesCS4B01G064300	121	11	362.975	31.1048	1.11e-16	-3.2941	down
TraesCS4B01G064400	187	28	391.789	54.4174	0	-2.6763	down
TraesCS4B01G064500	54	9	103.021	13.7182	1.71e-05	-2.40351	down
TraesCS4B01G067400	143	65	8.21488	4.43263	0.00192935	-1.11979	down
TraesCS4B01G070000	207	40	4.22312	0.867139	5.55e-16	-2.32922	down
TraesCS4B01G077600	2123	1049	38.2767	19.413	2.17e-07	-1.01606	down
TraesCS4B01G080500	172	67	4.41377	1.24308	1.24e-05	-1.34092	down
TraesCS4B01G096500	54	12	1.82729	0.426039	0.00029714	-2.04055	down
TraesCS4B01G097200	20245	7729	372.613	143.274	2.55e-15	-1.38904	down
TraesCS4B01G101700	62	19	3.0748	0.987552	0.00257845	-1.63174	down
TraesCS4B01G104100	93	14	43.6218	6.58678	3.33e-10	-2.60903	down
TraesCS4B01G117400	62	21	1.54334	0.569984	0.00835309	-1.49736	down
TraesCS4B01G132100	213	78	2.29959	0.845615	2.5e-07	-1.4321	down
TraesCS4B01G141400	142	65	2.28103	1.07149	0.00233382	-1.10977	down
TraesCS4B01G143500	234	52	16.7569	3.80654	3.11e-15	-2.13838	down
TraesCS4B01G172200	324	143	3.85519	1.39026	2.65e-06	-1.17166	down
TraesCS4B01G173700	914	301	23.9061	8.10387	2.22e-16	-1.59767	down
TraesCS4B01G175100	282	0	4.72056	0.00155578	0	-7.57441	down
TraesCS4B01G178100	2683	1179	23.6089	10.5846	1.37e-10	-1.18526	down
TraesCS4B01G181900	111	25	2.87973	0.647868	1.32e-08	-2.08639	down
TraesCS4B01G185100	61	5	2.46885	0.230656	3.57e-09	-3.26787	down
TraesCS4B01G187400	84	20	3.97484	0.999013	2.64e-06	-1.99222	down
TraesCS4B01G193700	26	91	0.855349	2.97734	1.79e-05	1.75049	up
TraesCS4B01G218900	156	52	7.82196	2.67631	6.5e-07	-1.55797	down
TraesCS4B01G219200	330	132	6.86812	2.84156	6.23e-08	-1.31225	down
TraesCS4B01G225500	326	131	7.27526	3.01392	8.27e-08	-1.30558	down
TraesCS4B01G226700	1548	764	35.9886	17.9788	3.29e-07	-1.01734	down
TraesCS4B01G226800	736	80	21.2796	2.62631	0	-3.17797	down
TraesCS4B01G233300	463	212	6.90399	3.17894	9.97e-07	-1.12149	down
TraesCS4B01G234100	860	399	13.6804	5.86707	7.68e-08	-1.10507	down
TraesCS4B01G235300	95	39	4.28837	1.81511	0.00487871	-1.25287	down
TraesCS4B01G235400	1497	206	45.1752	6.16069	0	-2.85241	down
TraesCS4B01G235700	75	22	0.901326	0.255965	0.000233844	-1.70334	down
TraesCS4B01G237300	127	20	17.7734	2.8637	5.6e-13	-2.58007	down
TraesCS4B01G237500	200	24	4.9467	0.622669	0	-2.98284	down
TraesCS4B01G237600	2022	919	61.9738	28.854	1.85e-09	-1.13637	down
TraesCS4B01G262700	66	17	0.698764	0.181154	0.000164745	-1.86808	down
TraesCS4B01G264500	2990	1423	72.4018	35.0545	1.77e-08	-1.07042	down
TraesCS4B01G264900	157	48	18.3078	5.71346	6.55e-08	-1.67924	down
TraesCS4B01G267700	97	13	2.42008	0.304415	2.12e-11	-2.76515	down
TraesCS4B01G269200	1628	778	32.4554	14.5428	5.21e-08	-1.06382	down
TraesCS4B01G278200	134	327	8.85651	18.3487	1.67e-07	1.27768	up
TraesCS4B01G282100	64	22	2.58835	0.928541	0.00778154	-1.47933	down
TraesCS4B01G288100	2210	1020	38.974	18.1295	3.99e-09	-1.11435	down
TraesCS4B01G289100	55	11	1.09543	0.228308	8.13e-05	-2.17746	down
TraesCS4B01G290900	67	21	2.34193	0.788787	0.00170012	-1.60672	down
TraesCS4B01G302200	336	89	10.813	2.90906	1.78e-15	-1.89905	down
TraesCS4B01G305700	31	101	0.84071	2.95285	1.85e-05	1.6575	up
TraesCS4B01G305800	54	10	0.802929	0.145111	4.76e-05	-2.27211	down
TraesCS4B01G306500	38	7	2.92473	0.580312	0.00272642	-2.21801	down
TraesCS4B01G318400	869	424	16.3937	7.73162	8.46e-07	-1.03271	down
TraesCS4B01G321800	520	185	4.76626	1.45885	3.94e-12	-1.48355	down
TraesCS4B01G328400	73	22	2.03005	0.500763	0.000449051	-1.66511	down
TraesCS4B01G328500	711	73	14.2899	1.44498	0	-3.2578	down
TraesCS4B01G328800	1670	528	50.8165	17.0795	0	-1.65846	down
TraesCS4B01G329400	294	673	5.97936	13.6865	1.34e-08	1.1907	up
TraesCS4B01G344100	83	32	1.11025	0.426445	0.00495707	-1.33512	down
TraesCS4B01G348200	288	111	4.57149	1.78643	5.8e-08	-1.36374	down
TraesCS4B01G348300	228	97	3.60963	1.56721	1.21e-05	-1.2204	down
TraesCS4B01G348400	463	186	7.3082	2.98	3.78e-09	-1.30885	down
TraesCS4B01G348500	64	18	3.30569	0.984675	0.00068006	-1.74868	down
TraesCS4B01G355300	238	115	5.90891	2.91393	0.000346022	-1.03978	down
TraesCS4B01G366800	284	137	8.24252	4.06628	0.000117037	-1.04367	down
TraesCS4B01G367600	890	21	83.5764	2.04711	0	-5.30903	down
TraesCS4B01G367800	573	1601	128.451	355.358	5.55e-16	1.47997	up
TraesCS4B01G377200	163	60	9.85322	3.6307	4.94e-06	-1.41962	down
TraesCS4B01G383100	1225	3133	53.5209	139.084	3.25e-14	1.3537	up
TraesCS4B01G393600	47	12	5.6525	0.852914	0.00466077	-1.846	down
TraesCS4B01G394700	664	271	16.2321	5.23532	4.95e-10	-1.28822	down
TraesCS4B01G394800	65	6	6.08251	0.603856	2.42e-09	-3.15056	down
TraesCS4B01G396400	79	14	2.52298	0.483921	8.73e-08	-2.37767	down
TraesCS4D01G001300	174	77	7.85096	3.57393	0.000274788	-1.16084	down
TraesCS4D01G006200	83	189	3.41887	7.97874	0.000124049	1.17289	up
TraesCS4D01G008300	55	1	1.32335	0.0261661	3.16e-11	-4.50525	down
TraesCS4D01G013400	382	77	13.7923	2.86626	0	-2.28865	down
TraesCS4D01G018900	19	64	0.312564	1.05094	0.0013178	1.67648	up
TraesCS4D01G024000	155	68	4.30112	1.95743	0.000515733	-1.17122	down
TraesCS4D01G030400	94	190	1.97135	3.89952	0.00228624	1.00387	up
TraesCS4D01G031600	773	355	56.3655	26.0213	7.42e-08	-1.11939	down
TraesCS4D01G031700	299	148	21.5524	10.7474	0.000193457	-1.00728	down
TraesCS4D01G031900	124	56	8.832	4.01564	0.00425604	-1.12623	down
TraesCS4D01G038300	0	86	0.0152497	1.61749	0	5.87827	up
TraesCS4D01G063200	803	243	204.432	60.1786	0	-1.71831	down
TraesCS4D01G063300	230	45	737.852	130.671	0	-2.31602	down
TraesCS4D01G069600	39	111	0.854138	2.42254	8.53e-05	1.47422	up
TraesCS4D01G070400	7	40	0.191775	0.984851	0.00110333	2.28929	up
TraesCS4D01G085400	48	12	1.81276	0.46906	0.0031659	-1.87545	down
TraesCS4D01G101100	52	15	4.31858	1.25387	0.00614005	-1.69784	down
TraesCS4D01G125700	271	579	1.86388	3.67765	7.23e-07	1.09108	up
TraesCS4D01G128900	262	1	4.70658	0.0194723	0	-6.72699	down
TraesCS4D01G134400	3542	1360	125.106	49.2584	6.66e-15	-1.37999	down
TraesCS4D01G136800	2535	1037	52.8681	21.8066	1.28e-12	-1.28835	down
TraesCS4D01G147700	760	340	4.83491	2.16227	2.23e-08	-1.15699	down
TraesCS4D01G163100	188	93	5.49593	2.88264	0.00241653	-1.00391	down
TraesCS4D01G180800	475	155	11.9984	4.01628	1.48e-13	-1.60639	down
TraesCS4D01G195100	38	2	0.747387	0.0427632	3.48e-06	-3.50119	down
TraesCS4D01G216600	71	8	1.16733	0.133509	2.55e-09	-2.93365	down
TraesCS4D01G227300	859	215	21.8367	5.42293	0	-1.99087	down
TraesCS4D01G227400	964	241	56.3466	14.4028	0	-1.99335	down
TraesCS4D01G227500	518	128	25.881	6.57731	0	-2.00428	down
TraesCS4D01G229100	238	102	4.31211	2.03263	1.07e-05	-1.2105	down
TraesCS4D01G231200	167	70	5.55946	2.37516	0.000100466	-1.23688	down
TraesCS4D01G231800	122	51	1.0321	0.449931	0.00109052	-1.23432	down
TraesCS4D01G236800	1077	181	29.5778	4.98718	0	-2.56314	down
TraesCS4D01G238700	97	5	2.95766	0.166116	1.11e-16	-3.92424	down
TraesCS4D01G240700	975	349	30.4737	10.8908	1.63e-14	-1.47824	down
TraesCS4D01G242200	172	40	4.82088	1.15217	8.6e-12	-2.06409	down
TraesCS4D01G262500	451	204	7.31351	3.72979	7.14e-07	-1.13883	down
TraesCS4D01G262900	1692	845	55.6576	28.595	5.28e-07	-1.00044	down
TraesCS4D01G263500	110	226	6.88666	14.3759	0.000570248	1.02891	up
TraesCS4D01G265100	336	160	39.4694	19.0382	2.88e-05	-1.06341	down
TraesCS4D01G268400	2207	925	37.0238	15.2451	9.08e-12	-1.25322	down
TraesCS4D01G273400	161	70	4.8246	2.17238	0.000318306	-1.18457	down
TraesCS4D01G282300	165	24	4.72462	0.708912	1.11e-16	-2.70756	down
TraesCS4D01G300500	72	19	2.2383	0.603405	8.42e-05	-1.84276	down
TraesCS4D01G300900	57	4	1.64722	0.115324	5.07e-09	-3.41395	down
TraesCS4D01G301800	66	23	1.71841	0.627375	0.007245	-1.46258	down
TraesCS4D01G314500	70	152	1.12977	2.37793	0.00171433	1.10236	up
TraesCS4D01G316400	835	335	34.8748	12.6501	4.22e-11	-1.31379	down
TraesCS4D01G318100	75	28	15.8248	5.42389	0.00668782	-1.37513	down
TraesCS4D01G324000	235	111	16.4969	7.99968	0.000198509	-1.072	down
TraesCS4D01G325500	247	109	3.70969	1.65905	1.94e-05	-1.16929	down
TraesCS4D01G325600	553	56	9.27131	1.07729	0	-3.26984	down
TraesCS4D01G326100	47	6	13.5554	1.7791	1.34e-05	-2.69508	down
TraesCS4D01G334100	209	449	5.68303	12.8575	2.3e-06	1.09775	up
TraesCS4D01G335100	1135	530	21.2879	10.1752	3.84e-08	-1.09647	down
TraesCS4D01G336100	247	110	4.66896	2.02921	2.56e-05	-1.15629	down
TraesCS4D01G337400	172	49	5.0958	1.50665	2.6e-09	-1.78084	down
TraesCS4D01G337500	76	14	2.00394	0.38515	2.87e-07	-2.32287	down
TraesCS4D01G347100	400	180	5.22686	2.35249	1.26e-06	-1.14549	down
TraesCS4D01G347700	393	184	15.2242	7.2148	6.28e-06	-1.08866	down
TraesCS4D01G357100	13	55	0.297591	1.24535	0.000459352	1.96314	up
TraesCS4D01G359900	86	10	8.31012	0.979637	4.88e-11	-2.92903	down
TraesCS4D01G366200	45	9	0.476696	0.0968898	0.000852821	-2.14819	down
TraesCS5A01G004500	4035	1818	47.116	21.3818	4.6e-10	-1.14957	down
TraesCS5A01G024100	104	27	7.32861	2.04511	5.69e-07	-1.88868	down
TraesCS5A01G034200	38	131	1.16922	3.98695	2.2e-07	1.74639	up
TraesCS5A01G037100	112	42	4.29494	1.67271	0.000272151	-1.38386	down
TraesCS5A01G049100	323	96	10.275	3.08468	5.1e-13	-1.73488	down
TraesCS5A01G049600	453	188	11.6742	5.37242	1.88e-08	-1.26214	down
TraesCS5A01G059200	7	54	0.347537	2.63726	1.72e-06	2.70878	up
TraesCS5A01G084000	1723	282	51.6441	8.58273	0	-2.60481	down
TraesCS5A01G097600	64	16	1.38373	0.358776	0.000161046	-1.90491	down
TraesCS5A01G100100	643	1819	6.75152	18.8685	2.22e-16	1.4981	up
TraesCS5A01G104600	65	0	1.55108	0.00625851	7.11e-15	-5.48228	down
TraesCS5A01G111800	290	100	5.17869	1.77359	8.85e-10	-1.52213	down
TraesCS5A01G114100	99	26	0.623427	0.161004	1.4e-06	-1.87017	down
TraesCS5A01G120300	803	149	11.6368	2.14652	0	-2.41843	down
TraesCS5A01G126900	129	59	2.95878	1.42475	0.00421487	-1.1092	down
TraesCS5A01G129600	1615	756	22.6934	10.8031	1.67e-08	-1.09357	down
TraesCS5A01G138100	79	184	0.737801	1.71489	8.51e-05	1.20449	up
TraesCS5A01G139300	48	5	0.986557	0.109192	2.18e-06	-2.93136	down
TraesCS5A01G141700	58	9	1.06212	0.172341	2.95e-06	-2.50393	down
TraesCS5A01G143200	185	72	4.46238	1.78843	6.07e-06	-1.34351	down
TraesCS5A01G143400	58	145	0.827858	2.07747	0.000108566	1.30012	up
TraesCS5A01G155500	196	66	2.64618	0.877435	5.27e-08	-1.54907	down
TraesCS5A01G163400	216	61	8.25466	2.37581	5.22e-11	-1.7993	down
TraesCS5A01G167100	98	17	3.38333	1.0847	1.12e-09	-2.42798	down
TraesCS5A01G169500	81	20	2.20936	0.581285	7.57e-06	-1.94069	down
TraesCS5A01G171900	412	155	4.5334	1.71264	6.06e-10	-1.4018	down
TraesCS5A01G181600	101	28	1.64036	0.377841	2.87e-06	-1.79728	down
TraesCS5A01G184300	74	6	1.26942	0.119293	3.38e-11	-3.33371	down
TraesCS5A01G187300	78	9	1.30501	0.13122	4.25e-10	-2.92208	down
TraesCS5A01G202700	119	298	1.8393	4.60633	1.49e-07	1.31361	up
TraesCS5A01G205200	304	84	13.9236	3.90751	6.72e-14	-1.83733	down
TraesCS5A01G205700	501	21	17.0317	0.758217	0	-4.4819	down
TraesCS5A01G205800	50	13	0.780224	0.212284	0.00313166	-1.82943	down
TraesCS5A01G208500	127	395	3.67185	11.4678	8.39e-13	1.62565	up
TraesCS5A01G219300	1863	449	256.96	62.5675	0	-2.04922	down
TraesCS5A01G225600	30	131	1.02252	4.50056	1.02e-09	2.07301	up
TraesCS5A01G227400	199	88	5.12019	2.30527	0.000101721	-1.16376	down
TraesCS5A01G227600	213	78	4.08356	1.52473	2.5e-07	-1.4321	down
TraesCS5A01G231300	145	22	5.45763	0.857477	8.1e-15	-2.64082	down
TraesCS5A01G231700	275	725	1.93268	4.75606	5.25e-12	1.39372	up
TraesCS5A01G233900	391	68	2.65173	0.470707	0	-2.49782	down
TraesCS5A01G237800	56	16	1.86418	0.556579	0.00290293	-1.71693	down
TraesCS5A01G238800	215	84	16.3019	6.39411	1.61e-06	-1.3405	down
TraesCS5A01G240300	707	276	7.08636	2.73609	3.06e-11	-1.35232	down
TraesCS5A01G241300	334	796	2.63664	6.25432	6.48e-10	1.2492	up
TraesCS5A01G242100	141	67	6.88263	3.3553	0.00518844	-1.05692	down
TraesCS5A01G242400	86	9	2.67757	0.304275	1.26e-11	-3.06043	down
TraesCS5A01G247700	51	117	2.4742	5.5417	0.00323207	1.17469	up
TraesCS5A01G247800	45	111	2.15424	5.38414	0.00125245	1.27485	up
TraesCS5A01G248100	174	78	7.31185	3.39708	0.000375296	-1.14257	down
TraesCS5A01G248700	56	7	0.536398	0.0724147	6.77e-07	-2.75986	down
TraesCS5A01G249000	341	886	20.2686	53.5568	2.66e-12	1.37368	up
TraesCS5A01G249300	484	29	5.01299	0.311048	0	-3.99315	down
TraesCS5A01G249600	203	631	1.67376	5.20439	1.89e-15	1.62903	up
TraesCS5A01G253200	4016	12626	42.2298	133.642	0	1.6522	up
TraesCS5A01G253900	47	0	0.655023	0	1.88e-10	-5.02681	down
TraesCS5A01G256600	97	34	2.77579	1.01922	0.000296773	-1.47263	down
TraesCS5A01G257100	23	86	0.788407	2.98066	1.21e-05	1.83704	up
TraesCS5A01G261500	1037	2175	21.1287	42.968	2.78e-08	1.06752	up
TraesCS5A01G262200	211	94	52.5338	22.9165	8.11e-05	-1.154	down
TraesCS5A01G262800	198	767	13.4907	52.9686	0	1.94572	up
TraesCS5A01G264800	208	79	4.85326	1.89262	9.62e-07	-1.38003	down
TraesCS5A01G269300	133	54	2.9898	1.23804	0.00030887	-1.27724	down
TraesCS5A01G272200	26	116	0.228476	0.973974	5.59e-09	2.09567	up
TraesCS5A01G281700	427	94	135.127	28.921	0	-2.16587	down
TraesCS5A01G287700	123	301	3.42517	8.49343	3.11e-07	1.28088	up
TraesCS5A01G292000	1105	321	12.6757	3.66224	0	-1.77867	down
TraesCS5A01G295400	232	110	4.58506	2.20542	0.000239043	-1.06646	down
TraesCS5A01G303300	19	60	0.816285	2.58404	0.00500148	1.58556	up
TraesCS5A01G304100	69	21	2.63452	0.822426	0.000886455	-1.64825	down
TraesCS5A01G305100	147	27	5.28311	0.998946	5.25e-13	-2.38195	down
TraesCS5A01G310700	441	1198	21.3139	58.651	2.25e-14	1.43871	up
TraesCS5A01G312000	13	48	1.08479	4.02802	0.00664079	1.77227	up
TraesCS5A01G312500	398	31	18.3233	1.4538	0	-3.6202	down
TraesCS5A01G315700	912	319	65.8226	23.3281	6.66e-15	-1.51112	down
TraesCS5A01G316600	15	52	0.493786	1.71106	0.00614005	1.69784	up
TraesCS5A01G316800	599	271	35.6004	16.221	1.34e-07	-1.13994	down
TraesCS5A01G318300	105	32	2.77833	0.866756	1.03e-05	-1.66899	down
TraesCS5A01G322300	285	134	8.9109	4.52031	5.17e-05	-1.08031	down
TraesCS5A01G328700	81	28	1.66358	0.58019	0.00120881	-1.48408	down
TraesCS5A01G330500	80	0	0.801489	0.000114229	0	-5.77577	down
TraesCS5A01G330900	21	63	0.164663	0.464729	0.00610503	1.5199	up
TraesCS5A01G337500	105	32	2.67585	0.835213	1.03e-05	-1.66899	down
TraesCS5A01G338200	85	10	1.44185	0.182157	7.51e-11	-2.91244	down
TraesCS5A01G338300	60	18	0.814394	0.255541	0.00269165	-1.65775	down
TraesCS5A01G338400	163	27	4.31937	0.757291	3e-15	-2.52958	down
TraesCS5A01G338500	82	5	0.920673	0.0755443	1.38e-13	-3.68586	down
TraesCS5A01G339100	86	16	9.28788	1.76196	4.02e-08	-2.32276	down
TraesCS5A01G339800	36	3	0.447021	0.0574103	5.52e-05	-3.06247	down
TraesCS5A01G343000	103	42	3.4187	1.43374	0.00243684	-1.26466	down
TraesCS5A01G344100	93	26	0.432897	0.121895	9.53e-06	-1.78135	down
TraesCS5A01G356300	518	149	17.1477	4.78955	0	-1.78745	down
TraesCS5A01G389000	7419	2823	107.892	42.5335	1.55e-15	-1.39352	down
TraesCS5A01G391500	64	20	3.06207	1.00941	0.0024633	-1.60773	down
TraesCS5A01G399800	142	13	2.60741	0.25159	0	-3.30806	down
TraesCS5A01G400500	644	278	30.5211	13.5068	9.79e-09	-1.20761	down
TraesCS5A01G403000	54	124	187.4	376.731	0.00213538	1.17731	up
TraesCS5A01G407400	1872	542	13.8546	3.99692	0	-1.78541	down
TraesCS5A01G413500	0	53	0.000493676	0.396761	5.92e-12	5.19512	up
TraesCS5A01G423900	90	224	3.5282	9.00059	2.54e-06	1.3014	up
TraesCS5A01G424000	7	40	0.411651	2.43931	0.00110333	2.28929	up
TraesCS5A01G427600	1041	256	7.18267	1.79929	0	-2.01746	down
TraesCS5A01G428000	46	5	0.298577	0.0347606	5.87e-06	-2.87184	down
TraesCS5A01G428200	218	35	1.61916	0.269298	0	-2.58867	down
TraesCS5A01G439700	655	219	87.4317	29.1785	1.15e-14	-1.57407	down
TraesCS5A01G439800	1794	767	132.337	57.2589	5.67e-11	-1.22428	down
TraesCS5A01G443800	234	112	11.6229	5.72733	0.000294479	-1.05312	down
TraesCS5A01G453200	865	265	80.5363	25.4703	0	-1.70111	down
TraesCS5A01G453800	268	78	9.17945	2.7317	4.41e-12	-1.76142	down
TraesCS5A01G454700	2462	925	45.3647	17.2233	3.22e-15	-1.41086	down
TraesCS5A01G463500	113	44	5.14146	2.05726	0.000513711	-1.33165	down
TraesCS5A01G471900	127	22	1.70314	0.315873	4.12e-12	-2.45167	down
TraesCS5A01G472500	79	28	2.55676	0.926265	0.00215376	-1.44867	down
TraesCS5A01G472800	53	16	1.97368	0.620885	0.0082942	-1.63961	down
TraesCS5A01G473200	112	25	2.55011	0.569605	9.48e-09	-2.09916	down
TraesCS5A01G480800	92	24	3.45665	0.932947	3.37e-06	-1.87499	down
TraesCS5A01G480900	225	502	1.37109	3.16482	2.51e-07	1.15253	up
TraesCS5A01G484800	695	241	34.3337	12.0362	4.94e-14	-1.52219	down
TraesCS5A01G486800	2030	196	52.3055	4.92835	0	-3.3627	down
TraesCS5A01G490200	364	133	3.46407	1.2673	6.32e-10	-1.44235	down
TraesCS5A01G498800	551	271	14.005	7.12238	7.33e-06	-1.01975	down
TraesCS5A01G498900	616	239	30.3725	12.344	6.59e-11	-1.36045	down
TraesCS5A01G500100	100	22	1.45585	0.309074	4.92e-08	-2.11134	down
TraesCS5A01G500300	1263	119	22.3638	2.24209	0	-3.3916	down
TraesCS5A01G503400	57	9	1.54694	0.248447	4.58e-06	-2.47948	down
TraesCS5A01G506900	2267	995	77.2292	34.3856	1.7e-10	-1.18681	down
TraesCS5A01G508100	93	229	0.739229	1.45822	2.88e-06	1.28649	up
TraesCS5A01G508500	2095	991	41.8635	19.913	1.86e-08	-1.07885	down
TraesCS5A01G511100	96	26	2.33069	0.659203	3.67e-06	-1.82645	down
TraesCS5A01G527100	858	1816	30.3194	66.052	2.22e-08	1.0804	up
TraesCS5A01G533600	13	53	0.0840684	0.326192	0.000995677	1.91113	up
TraesCS5A01G548600	354	864	13.003	32.2051	1.1e-10	1.28371	up
TraesCS5A01G549000	2911	509	36.3374	6.44045	0	-2.5123	down
TraesCS5B01G001000	40	2	1.30521	0.0712111	1.15e-06	-3.57247	down
TraesCS5B01G006500	105	40	1.00157	0.392811	0.000635108	-1.35994	down
TraesCS5B01G010300	801	2429	16.5206	35.0593	0	1.5987	up
TraesCS5B01G010400	221	502	6.0706	10.8218	1.16e-07	1.17823	up
TraesCS5B01G014000	42	154	0.270118	0.926625	4.53e-09	1.83813	up
TraesCS5B01G015100	97	217	2.13502	4.78869	7.27e-05	1.14954	up
TraesCS5B01G020700	81	11	6.0772	0.829174	1.44e-09	-2.72371	down
TraesCS5B01G021800	383	17	29.9738	1.38066	0	-4.37833	down
TraesCS5B01G025300	259	74	6.40407	1.90168	3.87e-12	-1.78691	down
TraesCS5B01G042800	40	0	0.284703	8.85e-06	1.16e-08	-4.80187	down
TraesCS5B01G054400	52	9	2.31567	0.416118	4.11e-05	-2.35055	down
TraesCS5B01G054600	57	16	3.03948	0.999719	0.00203543	-1.74181	down
TraesCS5B01G059200	2747	6468	37.9401	75.4631	6.69e-12	1.23501	up
TraesCS5B01G061600	86	1	3.9014	0.0739006	0	-5.1364	down
TraesCS5B01G063700	27	103	0.441234	1.54486	7.82e-07	1.87494	up
TraesCS5B01G063800	11	79	0.0671218	0.481138	3.37e-09	2.6883	up
TraesCS5B01G068200	43	8	4.53938	0.907437	0.00078344	-2.22932	down
TraesCS5B01G069000	77	160	1.36739	2.85674	0.00323469	1.04089	up
TraesCS5B01G073500	10	43	0.0963015	0.423658	0.00471434	1.95335	up
TraesCS5B01G076400	50	12	2.0069	0.493625	0.00144999	-1.93261	down
TraesCS5B01G080800	179	419	1.77185	4.26156	1.16e-07	1.22016	up
TraesCS5B01G084800	98	22	1.89572	0.445101	9.82e-08	-2.08263	down
TraesCS5B01G091200	361	126	4.18001	1.47875	1.01e-10	-1.50758	down
TraesCS5B01G093800	66	138	0.476629	1.11752	0.00667027	1.04745	up
TraesCS5B01G100800	64	21	3.00316	0.989496	0.00445013	-1.5421	down
TraesCS5B01G103000	140	66	2.01526	1.02767	0.00462206	-1.06798	down
TraesCS5B01G107500	102	219	6.24054	13.7257	0.000211257	1.09124	up
TraesCS5B01G120800	70	149	2.08697	4.53619	0.00296201	1.07388	up
TraesCS5B01G126800	120	32	8.2118	2.28364	1.22e-07	-1.85912	down
TraesCS5B01G127800	40	8	1.13576	0.245905	0.00292	-2.1286	down
TraesCS5B01G136900	167	64	2.96935	1.16314	1.08e-05	-1.36335	down
TraesCS5B01G137400	141	310	4.45426	9.11309	1.02e-05	1.12834	up
TraesCS5B01G143100	242	54	5.81736	1.3399	1.67e-15	-2.13362	down
TraesCS5B01G147500	79	28	13.1491	4.66638	0.00215376	-1.44867	down
TraesCS5B01G167600	75	9	1.32842	0.257978	1.6e-09	-2.86657	down
TraesCS5B01G170200	552	267	104.633	49.7329	3.67e-06	-1.0437	down
TraesCS5B01G202200	1881	726	14.602	5.67797	5.64e-14	-1.37165	down
TraesCS5B01G202700	823	205	37.1171	9.45918	0	-1.99744	down
TraesCS5B01G202800	74	22	2.73049	0.843586	0.000324271	-1.68435	down
TraesCS5B01G203100	558	209	17.1332	6.36714	2.61e-11	-1.41037	down
TraesCS5B01G210100	5337	2191	73.4771	30.3494	6.07e-13	-1.28386	down
TraesCS5B01G216200	165	81	4.71295	2.38654	0.00417369	-1.01317	down
TraesCS5B01G217000	355	173	13.0174	3.83543	4.62e-05	-1.03073	down
TraesCS5B01G218200	22634	4136	1571.66	292.898	0	-2.45176	down
TraesCS5B01G224000	33	140	1.09291	4.68145	5.99e-10	2.03653	up
TraesCS5B01G224100	23	129	0.801068	4.52428	5.35e-12	2.4138	up
TraesCS5B01G232400	261	79	2.02006	0.628897	2.89e-11	-1.70541	down
TraesCS5B01G235700	115	52	4.13726	1.95537	0.00698629	-1.1229	down
TraesCS5B01G239300	313	135	13.4408	5.98466	1.53e-06	-1.20423	down
TraesCS5B01G240000	58	19	1.14007	0.382638	0.00960028	-1.53785	down
TraesCS5B01G240700	137	63	6.35323	2.99045	0.00321477	-1.10267	down
TraesCS5B01G242700	240	110	4.85277	2.2229	7.34e-05	-1.11507	down
TraesCS5B01G244000	129	327	5.59349	14.328	4e-08	1.33193	up
TraesCS5B01G249800	88	26	5.76472	1.75461	4.6e-05	-1.70292	down
TraesCS5B01G256900	185	75	3.57358	1.50269	1.82e-05	-1.28578	down
TraesCS5B01G261300	323	856	21.3349	57.3432	1.08e-12	1.40195	up
TraesCS5B01G261500	633	167	13.4762	3.60078	0	-1.91295	down
TraesCS5B01G262500	76	28	1.64107	0.612532	0.00505365	-1.39387	down
TraesCS5B01G305500	146	20	4.87438	0.695531	6.66e-16	-2.77903	down
TraesCS5B01G305600	138	19	0.971991	0.138719	3.66e-15	-2.76733	down
TraesCS5B01G310800	139	283	6.38411	13.2814	0.000206307	1.01792	up
TraesCS5B01G311400	326	813	29.8386	75.4259	4.88e-11	1.31445	up
TraesCS5B01G312000	194	534	19.0313	53.0873	8.58e-12	1.45378	up
TraesCS5B01G315700	131	44	4.78396	1.64907	5.9e-06	-1.54232	down
TraesCS5B01G317200	14	51	0.467467	1.68269	0.00444182	1.76088	up
TraesCS5B01G332300	220	109	8.53276	4.29872	0.0010584	-1.00334	down
TraesCS5B01G337000	2049	909	71.5422	32.8303	4.1e-10	-1.17126	down
TraesCS5B01G337400	391	156	34.0625	13.8597	1.22e-08	-1.31741	down
TraesCS5B01G350700	78	26	2.37188	0.809853	0.000993024	-1.53196	down
TraesCS5B01G353200	45588	22124	3176.79	1577.29	2.73e-07	-1.04299	down
TraesCS5B01G355900	311	92	10.5679	3.12249	7.64e-13	-1.74095	down
TraesCS5B01G373000	230	50	3.77756	0.785661	2e-15	-2.16864	down
TraesCS5B01G375900	194	93	4.60803	2.28746	0.000948782	-1.04888	down
TraesCS5B01G383100	187	81	2.99059	1.31569	9.43e-05	-1.19222	down
TraesCS5B01G394200	3609	1105	55.5746	17.5155	0	-1.70621	down
TraesCS5B01G398400	95	14	3.03865	0.486805	1.5e-10	-2.63925	down
TraesCS5B01G402800	551	189	13.704	4.82005	3.21e-13	-1.53625	down
TraesCS5B01G403000	3731	1699	86.071	40.09	9.63e-10	-1.13419	down
TraesCS5B01G404600	487	88	8.93081	1.6621	0	-2.44857	down
TraesCS5B01G405300	1268	459	60.428	22.4376	5.22e-15	-1.46301	down
TraesCS5B01G412300	206	80	1.35622	0.531563	2.03e-06	-1.34838	down
TraesCS5B01G421100	6261	2275	467.979	173.785	0	-1.45993	down
TraesCS5B01G426300	310	1533	15.102	76.4029	0	2.30051	up
TraesCS5B01G431200	398	176	14.7964	6.16316	6.63e-07	-1.17043	down
TraesCS5B01G431600	55	17	1.50701	0.482688	0.00783444	-1.61139	down
TraesCS5B01G431700	498	164	11.135	3.38312	1.29e-13	-1.59373	down
TraesCS5B01G437300	86	32	0.852326	0.316668	0.00221745	-1.38546	down
TraesCS5B01G442600	789	316	109.231	43.7409	5.58e-11	-1.31604	down
TraesCS5B01G461900	45	3	0.966117	0.0813302	4.6e-07	-3.37291	down
TraesCS5B01G462200	2486	863	153.316	53.7627	0	-1.52477	down
TraesCS5B01G475300	56	16	1.77882	0.534757	0.00290293	-1.71693	down
TraesCS5B01G478100	163	58	27.6076	9.63728	2.08e-06	-1.46732	down
TraesCS5B01G483900	59	19	5.22857	1.75644	0.00693941	-1.5619	down
TraesCS5B01G484400	109	36	1.07789	0.373062	3.13e-05	-1.55941	down
TraesCS5B01G485400	178	78	6.7435	3.04917	0.000182978	-1.17509	down
TraesCS5B01G491300	159	374	9.03914	21.5123	2.26e-07	1.2263	up
TraesCS5B01G497600	975	226	47.165	11.2409	0	-2.10182	down
TraesCS5B01G498100	105	34	21.0975	6.77947	3.22e-05	-1.58531	down
TraesCS5B01G499700	91	10	3.07978	0.347439	5.71e-12	-3.00921	down
TraesCS5B01G500700	2278	402	58.2753	11.0606	0	-2.49811	down
TraesCS5B01G500800	136	51	2.42307	0.919808	4.59e-05	-1.38926	down
TraesCS5B01G503200	7442	3274	177.865	80.217	8.13e-11	-1.18427	down
TraesCS5B01G504000	1194	375	36.4129	11.7684	0	-1.66693	down
TraesCS5B01G504200	52	4	25.8629	2.2805	6.44e-08	-3.28502	down
TraesCS5B01G506400	173	50	2.30543	0.69035	3.55e-09	-1.76083	down
TraesCS5B01G509600	236	477	2.06349	4.18089	1.79e-05	1.01063	up
TraesCS5B01G511500	45	5	1.30121	0.17315	9.63e-06	-2.84114	down
TraesCS5B01G513700	39	156	0.712336	2.73392	3.8e-10	1.95969	up
TraesCS5B01G517200	234	70	10.439	3.53344	1.01e-10	-1.71989	down
TraesCS5B01G534300	158	43	8.90732	2.50699	2.85e-09	-1.84198	down
TraesCS5B01G540600	91	26	1.55925	0.307949	1.79e-05	-1.75049	down
TraesCS5B01G546200	439	176	4.42562	1.10119	5.43e-09	-1.31138	down
TraesCS5B01G559500	97	200	7.36353	14.9855	0.00105714	1.03268	up
TraesCS5D01G001100	57	10	1.83495	0.355209	1.32e-05	-2.34808	down
TraesCS5D01G001400	140	44	2.11855	0.691096	5.85e-07	-1.63714	down
TraesCS5D01G007900	398	802	56.0881	109.671	2.44e-06	1.00813	up
TraesCS5D01G013400	887	304	8.78329	3.07599	2.33e-15	-1.54024	down
TraesCS5D01G026300	37	122	4.77067	15.5306	1.5e-06	1.68191	up
TraesCS5D01G030000	922	274	60.4144	17.8727	0	-1.74511	down
TraesCS5D01G030700	336	159	12.2957	6.01041	2.33e-05	-1.07237	down
TraesCS5D01G032000	354	735	1.47043	2.92287	8.68e-07	1.05086	up
TraesCS5D01G032100	154	423	5.91353	15.2225	1.07e-10	1.44892	up
TraesCS5D01G033000	41	120	0.871532	1.84006	2.21e-05	1.5157	up
TraesCS5D01G034200	177	69	4.36218	1.74967	9.64e-06	-1.34039	down
TraesCS5D01G035500	6	50	0.0623434	0.487309	3.18e-06	2.78169	up
TraesCS5D01G036000	58	14	1.91581	0.497161	0.00032211	-1.94149	down
TraesCS5D01G050200	40	4	87.4866	8.32125	2.98e-05	-2.91849	down
TraesCS5D01G054300	52	12	3.42086	0.823521	0.00065864	-1.98759	down
TraesCS5D01G060300	407	136	7.98339	2.69161	3.34e-12	-1.57099	down
TraesCS5D01G061800	49	14	2.82785	0.861717	0.00920095	-1.70483	down
TraesCS5D01G068300	275	77	18.4232	5.21822	6.53e-13	-1.81668	down
TraesCS5D01G081000	273	126	7.72135	3.59939	3.82e-05	-1.10639	down
TraesCS5D01G082700	119	46	4.80393	1.90222	0.000288285	-1.34327	down
TraesCS5D01G090900	49	12	1.7168	0.436384	0.00214499	-1.90432	down
TraesCS5D01G091000	211	49	4.79828	1.1624	1.29e-13	-2.07338	down
TraesCS5D01G096400	2794	683	70.9699	17.4388	0	-2.03	down
TraesCS5D01G099700	124	51	4.20936	1.77408	0.000700834	-1.2575	down
TraesCS5D01G121500	229	785	2.47453	8.07257	0	1.77074	up
TraesCS5D01G124300	204	71	1.30788	0.501403	8.71e-08	-1.50325	down
TraesCS5D01G125100	122	251	1.92778	3.77523	0.000299534	1.03185	up
TraesCS5D01G137100	1622	804	21.6307	12.2046	3.8e-07	-1.01116	down
TraesCS5D01G141600	157	29	2.08661	0.413953	1.27e-13	-2.37809	down
TraesCS5D01G145300	712	257	185.143	61.2712	3.84e-13	-1.46479	down
TraesCS5D01G148000	124	26	2.86976	0.635459	4.05e-10	-2.1907	down
TraesCS5D01G153000	282	84	4.79683	1.48735	4.75e-12	-1.7295	down
TraesCS5D01G153600	245	530	3.66362	7.96915	6.79e-07	1.10852	up
TraesCS5D01G176700	157	68	1.44581	0.635256	0.000351034	-1.18955	down
TraesCS5D01G177300	367	109	27.8645	8.3477	6.59e-14	-1.73773	down
TraesCS5D01G180900	72	8	3.37266	0.405337	1.62e-09	-2.95342	down
TraesCS5D01G181200	63	132	1.66256	3.4937	0.00825582	1.04962	up
TraesCS5D01G181500	70	0	0.69856	0.00289058	4.44e-16	-5.58689	down
TraesCS5D01G183700	2438	903	25.8679	9.55753	1.11e-15	-1.43141	down
TraesCS5D01G189500	674	281	16.2106	6.78043	1.32e-09	-1.25774	down
TraesCS5D01G193700	76	27	0.657126	0.223603	0.00305751	-1.44364	down
TraesCS5D01G199900	91	36	2.07172	0.848044	0.0037042	-1.30285	down
TraesCS5D01G208900	57	16	1.56667	0.446797	0.00203543	-1.74181	down
TraesCS5D01G210600	1125	191	51.3544	8.89459	0	-2.549	down
TraesCS5D01G210900	153	24	7.04775	1.11401	4.22e-15	-2.59964	down
TraesCS5D01G216000	233	108	10.3698	4.79625	0.000123357	-1.09875	down
TraesCS5D01G216400	86	26	1.55936	0.492172	8.59e-05	-1.67031	down
TraesCS5D01G218400	7587	2977	140.374	55.3027	1.73e-14	-1.34923	down
TraesCS5D01G229800	119	50	2.76964	1.16077	0.00144565	-1.22659	down
TraesCS5D01G232800	21	102	0.746435	3.52696	1.06e-08	2.20227	up
TraesCS5D01G232900	76	252	1.92808	6.04057	4.33e-11	1.70988	up
TraesCS5D01G235600	248	562	15.8711	36.0766	6.32e-08	1.17542	up
TraesCS5D01G236600	67	11	3.91687	0.70197	5.37e-07	-2.45537	down
TraesCS5D01G238800	55	16	1.56445	0.484084	0.00413044	-1.69162	down
TraesCS5D01G241000	267	78	9.84661	2.91034	5.39e-12	-1.75606	down
TraesCS5D01G243800	129	41	1.8407	0.599627	2.08e-06	-1.61881	down
TraesCS5D01G249500	143	47	6.59217	2.23248	1.3e-06	-1.57526	down
TraesCS5D01G251800	129	24	2.60597	0.459062	1.35e-11	-2.35606	down
TraesCS5D01G253400	15	60	1.36141	5.43085	0.000329971	1.89893	up
TraesCS5D01G257400	121	39	2.04253	0.670899	6e-06	-1.59709	down
TraesCS5D01G265700	93	313	2.84436	9.74498	8.28e-13	1.73481	up
TraesCS5D01G270400	182	501	12.5774	35.1893	1.64e-11	1.45341	up
TraesCS5D01G271900	142	54	3.33332	1.28359	4.18e-05	-1.37069	down
TraesCS5D01G274900	578	282	13.3429	6.95992	4.25e-06	-1.03149	down
TraesCS5D01G275300	74	0	3.15637	8.95e-05	0	-5.66543	down
TraesCS5D01G276300	37	109	1.41882	4.18888	5.29e-05	1.52143	up
TraesCS5D01G277500	476	205	10.1961	4.44972	6.45e-08	-1.20941	down
TraesCS5D01G284800	1346	625	82.3931	38.2032	1.69e-08	-1.10491	down
TraesCS5D01G288900	351	53	109.097	16.1186	0	-2.69358	down
TraesCS5D01G293500	489	182	9.07713	3.4902	6.74e-11	-1.41854	down
TraesCS5D01G299300	2158	1003	20.8295	9.86639	6.3e-09	-1.10423	down
TraesCS5D01G302900	94	31	1.69582	0.556819	0.000141855	-1.55543	down
TraesCS5D01G312100	206	25	7.39695	0.922839	0	-2.96965	down
[truncated: 1,362 more rows]
