# Supplementary material for: Bulked Segregant RNA-Seq Provides Distinctive Expression Profile Against Powdery Mildew in the Wheat Genotype YD588
Source: Front Plant Sci. 2021 Dec 3;12:764978. doi: 10.3389/fpls.2021.764978 (PMC8677838; doi:10.3389/fpls.2021.764978)
Supplement: Supplementary file 6 [file Table_6.XLSX]

## Sheet: Group_TA5886.annotation
Table S6. Differentially expressed genes (DEGs) with consistent expression difference between parents and bulks used for CO, COG and KEGG pathway analysis.
#ID	COG_class	COG_class_annotation	GO_annotation	KEGG_annotation	KEGG_pathway_annotation	Swiss-Prot_annotation	NR_annotation
TraesCS3B02G144500	--	--	Biological Process: flavonoid biosynthetic process (GO:0009813);; Cellular Component: intracellular membrane-bounded organelle (GO:0043231);; Biological Process: flavonoid glucuronidation (GO:0052696);; Molecular Function: quercetin 3-O-glucosyltransferase activity (GO:0080043);; Molecular Function: quercetin 7-O-glucosyltransferase activity (GO:0080044);;	K13496|1.64178e-43|bdi:100830513|K13496 UDP-glucosyl transferase 73C [EC:2.4.1.-] | (RefSeq) UDP-glycosyltransferase 73C1-like	--	UDP-glycosyltransferase 73C4 OS=Arabidopsis thaliana OX=3702 GN=UGT73C4 PE=2 SV=1	UDP-glucosyltransferase HvUGT5876 [Hordeum vulgare subsp. vulgare]
TraesCS5A02G155500	--	--	Cellular Component: ubiquitin ligase complex (GO:0000151);; Biological Process: protein polyubiquitination (GO:0000209);; Molecular Function: nucleic acid binding (GO:0003676);; Cellular Component: cytoplasm (GO:0005737);; Molecular Function: zinc ion binding (GO:0008270);; Molecular Function: ubiquitin conjugating enzyme binding (GO:0031624);; Biological Process: positive regulation of proteasom…	--	--	ATP-dependent RNA helicase DEAH11, chloroplastic OS=Arabidopsis thaliana OX=3702 GN=At4g01020 PE=3 SV=1	uncharacterized protein LOC109756997 [Aegilops tauschii subsp. tauschii]
TraesCS6B02G115500	--	--	Cellular Component: mitochondrial respiratory chain complex I (GO:0005747);; Cellular Component: integral component of membrane (GO:0016021);; Biological Process: electron transport chain (GO:0022900);;	--	--	NADH dehydrogenase [ubiquinone] 1 beta subcomplex subunit 3-B OS=Arabidopsis thaliana OX=3702 GN=At1g14450 PE=3 SV=1	predicted protein, partial [Hordeum vulgare subsp. vulgare]
TraesCS2D02G343800	--	--	--	K03124|1.9575e-17|sita:101753362|K03124 transcription initiation factor TFIIB | (RefSeq) transcription initiation factor IIB-like	Basal transcription factors (ko03022)	--	transcription initiation factor IIB-like [Aegilops tauschii subsp. tauschii]
TraesCS2B02G023500	[Q]	Secondary metabolites biosynthesis, transport and catabolism	Molecular Function: oxidoreductase activity (GO:0016491);; Biological Process: oxidation-reduction process (GO:0055114);;	--	--	Probable NAD(P)H-dependent oxidoreductase 2 OS=Oryza sativa subsp. japonica OX=39947 GN=Os10g0113100 PE=2 SV=1	probable NAD(P)H-dependent oxidoreductase 1 [Aegilops tauschii subsp. tauschii]
TraesCS3A02G122600	[Q]	Secondary metabolites biosynthesis, transport and catabolism	Biological Process: response to light stimulus (GO:0009416);; Biological Process: gibberellin biosynthetic process (GO:0009686);; Biological Process: gibberellic acid mediated signaling pathway (GO:0009740);; Molecular Function: gibberellin 3-beta-dioxygenase activity (GO:0016707);; Molecular Function: metal ion binding (GO:0046872);; Biological Process: oxidation-reduction process (GO:0055114);;	K04124|0|sita:101753273|K04124 gibberellin 3-beta-dioxygenase [EC:1.14.11.15] | (RefSeq) gibberellin 3-beta-dioxygenase 2-2-like	Diterpenoid biosynthesis (ko00904)	Gibberellin 3-beta-dioxygenase 2-1 OS=Triticum aestivum OX=4565 GN=GA3ox2-1 PE=1 SV=1	RecName: Full=Gibberellin 3-beta-dioxygenase 2-1; AltName: Full=Gibberellin 3 beta-hydroxylase 2-1; AltName: Full=Gibberellin 3-oxidase 2-1
TraesCS6B02G152300	[K]	Transcription	Molecular Function: protein serine/threonine kinase activity (GO:0004674);; Molecular Function: ATP binding (GO:0005524);; Biological Process: protein phosphorylation (GO:0006468);; Cellular Component: integral component of membrane (GO:0016021);;	--	--	Tyrosine-sulfated glycopeptide receptor 1 OS=Arabidopsis thaliana OX=3702 GN=PSY1R PE=1 SV=1	tyrosine-sulfated glycopeptide receptor 1-like [Aegilops tauschii subsp. tauschii]
Triticum_aestivum_newGene_40130	--	--	Molecular Function: catalytic activity (GO:0003824);; Cellular Component: cytosol (GO:0005829);; Molecular Function: coenzyme binding (GO:0050662);;	--	--	Cinnamoyl-CoA reductase 1 OS=Arabidopsis thaliana OX=3702 GN=CCR1 PE=1 SV=1	hypothetical protein TRIUR3_28271 [Triticum urartu]
Triticum_aestivum_newGene_69151	--	--	Molecular Function: glutamate-ammonia ligase activity (GO:0004356);; Molecular Function: ATP binding (GO:0005524);; Cellular Component: cytoplasm (GO:0005737);; Biological Process: glutamine biosynthetic process (GO:0006542);;	K01915|3.78854e-11|bdi:100824429|K01915 glutamine synthetase [EC:6.3.1.2] | (RefSeq) glutamine synthetase cytosolic isozyme 1-2	Arginine biosynthesis (ko00220);; Alanine, aspartate and glutamate metabolism (ko00250);; Glyoxylate and dicarboxylate metabolism (ko00630);; Nitrogen metabolism (ko00910);; Biosynthesis of amino acids (ko01230)	Glutamine synthetase cytosolic isozyme 1-1 OS=Oryza sativa subsp. japonica OX=39947 GN=GLN1-1 PE=1 SV=1	Glutamine synthetase cytosolic isozyme 1-2 [Triticum urartu]
TraesCS2B02G516600	--	--	--	K18185|3.32688e-44|bdi:100826921|K18185 cytochrome c oxidase assembly protein subunit 23 | (RefSeq) uncharacterized LOC100826921	--	--	cytochrome c oxidase-assembly factor COX23, mitochondrial [Aegilops tauschii subsp. tauschii]
Triticum_aestivum_newGene_88966	--	--	--	--	--	Alpha-aminoadipic semialdehyde synthase OS=Arabidopsis thaliana OX=3702 GN=LKR/SDH PE=1 SV=1	Saccharopine dehydrogenase / Homospermidine synthase [Macleaya cordata]
TraesCS1D02G052500	[E]	Amino acid transport and metabolism	Biological Process: cellular amino acid metabolic process (GO:0006520);; Molecular Function: carboxy-lyase activity (GO:0016831);; Molecular Function: pyridoxal phosphate binding (GO:0030170);;	K01592|0|bdi:100832786|K01592 tyrosine decarboxylase [EC:4.1.1.25] | (RefSeq) aromatic-L-amino-acid decarboxylase-like	Tyrosine metabolism (ko00350);; Isoquinoline alkaloid biosynthesis (ko00950)	Aromatic-L-amino-acid decarboxylase OS=Catharanthus roseus OX=4058 GN=TDC PE=2 SV=1	aromatic-L-amino-acid decarboxylase-like [Aegilops tauschii subsp. tauschii]
TraesCS5A02G348800	--	--	--	--	--	--	uncharacterized protein LOC109774824 [Aegilops tauschii subsp. tauschii]
TraesCS1A02G257400	[E]	Amino acid transport and metabolism	Molecular Function: transporter activity (GO:0005215);; Biological Process: transport (GO:0006810);; Cellular Component: integral component of membrane (GO:0016021);;	--	--	Protein NRT1/ PTR FAMILY 3.1 OS=Arabidopsis thaliana OX=3702 GN=NPF3.1 PE=2 SV=1	protein NRT1/ PTR FAMILY 3.1-like [Aegilops tauschii subsp. tauschii]
TraesCSU02G142700	--	--	Molecular Function: hydrolase activity, hydrolyzing O-glycosyl compounds (GO:0004553);; Biological Process: carbohydrate metabolic process (GO:0005975);; Cellular Component: integral component of membrane (GO:0016021);; Molecular Function: polysaccharide binding (GO:0030247);; Cellular Component: anchored component of plasma membrane (GO:0046658);;	--	--	Glucan endo-1,3-beta-glucosidase 5 OS=Arabidopsis thaliana OX=3702 GN=At4g31140 PE=1 SV=1	glucan endo-1,3-beta-glucosidase 5 [Aegilops tauschii subsp. tauschii]
TraesCS3B02G042800	--	--	Molecular Function: aspartic-type endopeptidase activity (GO:0004190);; Biological Process: proteolysis (GO:0006508);; Biological Process: xylan catabolic process (GO:0045493);;	--	--	Basic 7S globulin OS=Glycine max OX=3847 GN=BG PE=1 SV=2	uncharacterized protein LOC109772660 [Aegilops tauschii subsp. tauschii]
TraesCS2B02G285900	--	--	Cellular Component: plant-type vacuole membrane (GO:0009705);; Cellular Component: integral component of membrane (GO:0016021);; Biological Process: viral replication complex formation and maintenance (GO:0046786);;	--	--	Tobamovirus multiplication protein 1 OS=Arabidopsis thaliana OX=3702 GN=TOM1 PE=1 SV=1	tobamovirus multiplication protein 1 [Aegilops tauschii subsp. tauschii]
TraesCS6B02G182500	--	--	Molecular Function: transcription factor activity, sequence-specific DNA binding (GO:0003700);; Biological Process: regulation of transcription, DNA-templated (GO:0006355);; Molecular Function: sequence-specific DNA binding (GO:0043565);;	--	--	bZIP transcription factor RISBZ3 OS=Oryza sativa subsp. japonica OX=39947 GN=RISBZ3 PE=1 SV=1	basic leucine zipper 63-like isoform X2 [Aegilops tauschii subsp. tauschii]
Triticum_aestivum_newGene_48463	--	--	--	--	--	SPX domain-containing membrane protein Os06g0129400 OS=Oryza sativa subsp. japonica OX=39947 GN=Os06g0129400 PE=2 SV=1	salt stress protein 8 [Triticum aestivum]
TraesCS6B02G337400	--	--	--	--	--	--	uncharacterized protein LOC109741044 [Aegilops tauschii subsp. tauschii]
Triticum_aestivum_newGene_83437	--	--	--	--	--	--	uncharacterized protein LOC109757476 [Aegilops tauschii subsp. tauschii]
TraesCS1B02G249000	--	--	Biological Process: carbohydrate metabolic process (GO:0005975);; Molecular Function: polysaccharide binding (GO:0030247);; Molecular Function: licheninase activity (GO:0042972);; Cellular Component: anchored component of plasma membrane (GO:0046658);;	--	--	Lichenase-2 (Fragment) OS=Hordeum vulgare OX=4513 PE=1 SV=1	lichenase-2 [Aegilops tauschii subsp. tauschii]
Triticum_aestivum_newGene_62840	--	--	Cellular Component: nucleosome (GO:0000786);; Molecular Function: DNA binding (GO:0003677);; Cellular Component: nucleus (GO:0005634);; Molecular Function: methyltransferase activity (GO:0008168);; Biological Process: methylation (GO:0032259);; Molecular Function: protein heterodimerization activity (GO:0046982);;	K11253|2.34495e-33|ppp:PHYPADRAFT_157798|K11253 histone H3 | (RefSeq) HTR1515; histone H3	--	Histone H3.3 OS=Vitis vinifera OX=29760 PE=2 SV=3	Histone H3.3 [Triticum urartu]
TraesCS4D02G347700	--	--	Biological Process: carbohydrate transport (GO:0008643);; Cellular Component: integral component of Golgi membrane (GO:0030173);; Cellular Component: integral component of endoplasmic reticulum membrane (GO:0030176);; Molecular Function: 3'-phosphoadenosine 5'-phosphosulfate transmembrane transporter activity (GO:0046964);; Biological Process: 3'-phospho-5'-adenylyl sulfate transmembrane transpor…	K15277|0|bdi:100845462|K15277 solute carrier family 35 (adenosine 3'-phospho 5'-phosphosulfate transporter), member B3 | (RefSeq) UDP-galactose/UDP-glucose transporter 2-like	--	UDP-galactose/UDP-glucose transporter 2 OS=Arabidopsis thaliana OX=3702 GN=UTR2 PE=2 SV=1	UDP-galactose/UDP-glucose transporter 2-like [Aegilops tauschii subsp. tauschii]
Triticum_aestivum_newGene_40196	--	--	--	--	--	--	hypothetical protein TRIUR3_06504 [Triticum urartu]
Triticum_aestivum_newGene_57220	--	--	Cellular Component: membrane (GO:0016020);; Biological Process: macromolecule metabolic process (GO:0043170);; Biological Process: primary metabolic process (GO:0044238);;	--	--	--	hypothetical protein TRIUR3_29531 [Triticum urartu]
TraesCS3B02G109200	--	--	Molecular Function: serine-type endopeptidase inhibitor activity (GO:0004867);; Molecular Function: peptidase activity (GO:0008233);; Biological Process: response to wounding (GO:0009611);; Biological Process: negative regulation of endopeptidase activity (GO:0010951);;	--	--	Subtilisin-chymotrypsin inhibitor-2A OS=Hordeum vulgare OX=4513 PE=1 SV=2	unnamed protein product [Triticum aestivum]
TraesCS2B02G343600	--	--	Biological Process: transcription, DNA-templated (GO:0006351);; Cellular Component: membrane (GO:0016020);;	--	--	NAC domain-containing protein 100 OS=Arabidopsis thaliana OX=3702 GN=NAC100 PE=2 SV=1	NAC domain-containing protein 92-like [Aegilops tauschii subsp. tauschii]
TraesCS3A02G276900	--	--	Cellular Component: plant-type cell wall (GO:0009505);;	--	--	--	uncharacterized protein LOC109762553 [Aegilops tauschii subsp. tauschii]
TraesCS5A02G312500	--	--	Molecular Function: chaperone binding (GO:0051087);;	--	--	BAG family molecular chaperone regulator 1 OS=Arabidopsis thaliana OX=3702 GN=BAG1 PE=1 SV=1	BAG family molecular chaperone regulator 1-like [Aegilops tauschii subsp. tauschii]
Triticum_aestivum_newGene_53506	--	--	--	--	--	--	probable serine/threonine-protein kinase PBL10 [Aegilops tauschii subsp. tauschii]
Triticum_aestivum_newGene_100186	--	--	--	--	--	--	uncharacterized protein LOC109755212 [Aegilops tauschii subsp. tauschii]
TraesCS2B02G476700	--	--	--	--	--	Protein MARD1 OS=Arabidopsis thaliana OX=3702 GN=MARD1 PE=2 SV=2	uncharacterized protein LOC109765514 [Aegilops tauschii subsp. tauschii]
TraesCS1D02G266100	--	--	Molecular Function: serine-type endopeptidase inhibitor activity (GO:0004867);; Cellular Component: extracellular region (GO:0005576);; Biological Process: negative regulation of endopeptidase activity (GO:0010951);;	--	--	--	uncharacterized protein LOC109755132 [Aegilops tauschii subsp. tauschii]
TraesCS2B02G275200	--	--	Cellular Component: mitochondrion (GO:0005739);; Cellular Component: integral component of membrane (GO:0016021);;	--	--	Protein PHLOEM PROTEIN 2-LIKE A10 OS=Arabidopsis thaliana OX=3702 GN=PP2A10 PE=2 SV=1	protein PHLOEM PROTEIN 2-LIKE A10-like [Aegilops tauschii subsp. tauschii]
TraesCS1A02G048700	--	--	Biological Process: lipid transport (GO:0006869);; Molecular Function: lipid binding (GO:0008289);;	--	--	Non-specific lipid transfer protein GPI-anchored 2 OS=Arabidopsis thaliana OX=3702 GN=LTPG2 PE=2 SV=1	non-specific lipid-transfer protein-like protein At2g13820 [Aegilops tauschii subsp. tauschii]
TraesCS7B02G186000	--	--	--	--	--	--	uncharacterized protein LOC109787338 isoform X2 [Aegilops tauschii subsp. tauschii]
TraesCS7A02G276400	--	--	Biological Process: response to light stimulus (GO:0009416);; Cellular Component: photosystem I (GO:0009522);; Cellular Component: photosystem II (GO:0009523);; Cellular Component: chloroplast thylakoid membrane (GO:0009535);; Biological Process: photosynthesis, light harvesting in photosystem I (GO:0009768);; Cellular Component: chloroplast envelope (GO:0009941);; Cellular Component: plastoglobu…	K08912|2.29957e-157|bdi:104583754|K08912 light-harvesting complex II chlorophyll a/b binding protein 1 | (RefSeq) chlorophyll a-b binding protein of LHCII type 1-like	Photosynthesis - antenna proteins (ko00196)	Chlorophyll a-b binding protein 1B, chloroplastic OS=Solanum lycopersicum OX=4081 GN=CAB1B PE=3 SV=1	chlorophyll a-b binding protein of LHCII type 1-like [Aegilops tauschii subsp. tauschii]
TraesCS7B02G335000	[K]	Transcription	Molecular Function: protein serine/threonine kinase activity (GO:0004674);; Molecular Function: ATP binding (GO:0005524);; Biological Process: protein phosphorylation (GO:0006468);; Cellular Component: integral component of membrane (GO:0016021);;	--	--	Tyrosine-sulfated glycopeptide receptor 1 OS=Arabidopsis thaliana OX=3702 GN=PSY1R PE=1 SV=1	tyrosine-sulfated glycopeptide receptor 1-like [Aegilops tauschii subsp. tauschii]
TraesCS1B02G104700	[T]	Signal transduction mechanisms	Molecular Function: voltage-gated potassium channel activity (GO:0005249);; Cellular Component: integral component of plasma membrane (GO:0005887);; Biological Process: regulation of membrane potential (GO:0042391);; Biological Process: potassium ion transmembrane transport (GO:0071805);;	K05391|0|bdi:100831006|K05391 cyclic nucleotide gated channel, other eukaryote | (RefSeq) putative cyclic nucleotide-gated ion channel 7	--	Putative cyclic nucleotide-gated ion channel 7 OS=Arabidopsis thaliana OX=3702 GN=CNGC7 PE=3 SV=1	predicted protein [Hordeum vulgare subsp. vulgare]
Triticum_aestivum_newGene_98111	--	--	Molecular Function: ATP binding (GO:0005524);; Cellular Component: trans-Golgi network (GO:0005802);; Cellular Component: plasma membrane (GO:0005886);; Biological Process: protein folding (GO:0006457);; Biological Process: response to stress (GO:0006950);; Molecular Function: phosphate ion transmembrane transporter activity (GO:0015114);; Cellular Component: integral component of membrane (GO:00…	--	--	Phosphate transporter PHO1-2 OS=Oryza sativa subsp. japonica OX=39947 GN=PHO1-2 PE=2 SV=1	unnamed protein product [Triticum aestivum]
TraesCS7A02G543200	--	--	Cellular Component: integral component of membrane (GO:0016021);;	--	--	--	uncharacterized protein LOC103654518 [Zea mays]
Triticum_aestivum_newGene_47268	[X]	Mobilome: prophages, transposons	Cellular Component: plastid (GO:0009536);; Molecular Function: metal ion binding (GO:0046872);;	--	--	Retrovirus-related Pol polyprotein from transposon RE1 OS=Arabidopsis thaliana OX=3702 GN=RE1 PE=2 SV=1	putative polyprotein [Oryza sativa Japonica Group]
Triticum_aestivum_newGene_69479	[G]	Carbohydrate transport and metabolism	Molecular Function: binding (GO:0005488);; Cellular Component: plastid (GO:0009536);; Biological Process: phosphorylation (GO:0016310);; Molecular Function: transferase activity (GO:0016740);; Biological Process: organophosphate metabolic process (GO:0019637);; Biological Process: carbohydrate derivative metabolic process (GO:1901135);;	K00850|1.35102e-38|bdi:100833338|K00850 6-phosphofructokinase 1 [EC:2.7.1.11] | (RefSeq) ATP-dependent 6-phosphofructokinase 2	Glycolysis / Gluconeogenesis (ko00010);; Pentose phosphate pathway (ko00030);; Fructose and mannose metabolism (ko00051);; Galactose metabolism (ko00052);; Carbon metabolism (ko01200);; Biosynthesis of amino acids (ko01230);; RNA degradation (ko03018)	ATP-dependent 6-phosphofructokinase 2 OS=Arabidopsis thaliana OX=3702 GN=PFK2 PE=1 SV=1	predicted protein [Hordeum vulgare subsp. vulgare]
Triticum_aestivum_newGene_43526	--	--	Molecular Function: DNA binding (GO:0003677);; Cellular Component: intracellular membrane-bounded organelle (GO:0043231);; Cellular Component: cytoplasmic part (GO:0044444);;	--	--	--	uncharacterized protein LOC103655242 isoform X2 [Zea mays]
TraesCS7B02G178200	--	--	Cellular Component: integral component of membrane (GO:0016021);;	--	--	--	uncharacterized protein LOC109736996 [Aegilops tauschii subsp. tauschii]
TraesCS2B02G182800	[R]	General function prediction only	--	--	--	Putative disease resistance protein RGA4 OS=Solanum bulbocastanum OX=147425 GN=RGA4 PE=2 SV=1	disease resistance protein RGA2-like [Aegilops tauschii subsp. tauschii]
Triticum_aestivum_newGene_26250	--	--	--	--	--	--	PREDICTED: uncharacterized protein LOC104583888 [Brachypodium distachyon]
Triticum_aestivum_newGene_5565	--	--	--	--	--	--	hypothetical protein BRADI_3g04033v3 [Brachypodium distachyon]
TraesCS4D02G337500	[QV]	Secondary metabolites biosynthesis, transport and catabolism;; Defense mechanisms	Molecular Function: monooxygenase activity (GO:0004497);; Molecular Function: iron ion binding (GO:0005506);; Cellular Component: integral component of membrane (GO:0016021);; Molecular Function: oxidoreductase activity, acting on paired donors, with incorporation or reduction of molecular oxygen (GO:0016705);; Molecular Function: heme binding (GO:0020037);; Biological Process: oxidation-reductio…	--	--	Noroxomaritidine synthase OS=Narcissus aff. pseudonarcissus MK-2014 OX=1540222 GN=Cyp96T1 PE=1 SV=1	cytochrome P450 86B1-like [Aegilops tauschii subsp. tauschii]
TraesCS1D02G036900	--	--	Molecular Function: kinase activity (GO:0016301);; Biological Process: phosphorylation (GO:0016310);;	--	--	Cysteine-rich repeat secretory protein 55 OS=Arabidopsis thaliana OX=3702 GN=CRRSP55 PE=2 SV=1	cysteine-rich repeat secretory protein 55-like [Aegilops tauschii subsp. tauschii]
TraesCS3D02G483000	[O]	Posttranslational modification, protein turnover, chaperones	Molecular Function: glutathione transferase activity (GO:0004364);; Cellular Component: cytoplasm (GO:0005737);; Biological Process: glutathione metabolic process (GO:0006749);; Biological Process: toxin catabolic process (GO:0009407);;	K00799|1.78441e-105|sita:101773133|K00799 glutathione S-transferase [EC:2.5.1.18] | (RefSeq) glutathione transferase GST 23-like	Glutathione metabolism (ko00480)	Glutathione S-transferase U8 OS=Arabidopsis thaliana OX=3702 GN=GSTU8 PE=2 SV=1	glutathione S-transferase U8-like [Aegilops tauschii subsp. tauschii]
TraesCS4A02G406700	--	--	Molecular Function: actin binding (GO:0003779);;	--	--	Stomatal closure-related actin-binding protein 1 OS=Arabidopsis thaliana OX=3702 GN=SCAB1 PE=1 SV=1	stomatal closure-related actin-binding protein 1-like isoform X1 [Aegilops tauschii subsp. tauschii]
TraesCSU02G104800	--	--	--	--	--	Protein IQ-DOMAIN 14 OS=Arabidopsis thaliana OX=3702 GN=IQD14 PE=1 SV=1	protein IQ-DOMAIN 14-like [Aegilops tauschii subsp. tauschii]
TraesCS2B02G189000	--	--	Cellular Component: signal peptidase complex (GO:0005787);; Biological Process: signal peptide processing (GO:0006465);; Molecular Function: peptidase activity (GO:0008233);; Cellular Component: integral component of membrane (GO:0016021);;	--	--	Signal peptidase complex-like protein DTM1 OS=Oryza sativa subsp. japonica OX=39947 GN=DTM1 PE=2 SV=1	signal peptidase complex-like protein DTM1 [Aegilops tauschii subsp. tauschii]
TraesCS7D02G339200	--	--	Cellular Component: Golgi membrane (GO:0000139);; Biological Process: protein glycosylation (GO:0006486);; Molecular Function: galactosyltransferase activity (GO:0008378);; Cellular Component: integral component of membrane (GO:0016021);;	K20855|0|bdi:100823235|K20855 beta-1,3-galactosyltransferase 1/2/3/4/5/7/8 [EC:2.4.1.-] | (RefSeq) probable beta-1,3-galactosyltransferase 2	--	Probable beta-1,3-galactosyltransferase 2 OS=Arabidopsis thaliana OX=3702 GN=B3GALT2 PE=2 SV=1	probable beta-1,3-galactosyltransferase 2 [Aegilops tauschii subsp. tauschii]
TraesCS6A02G023300	[G]	Carbohydrate transport and metabolism	Molecular Function: sucrose alpha-glucosidase activity (GO:0004575);; Biological Process: carbohydrate metabolic process (GO:0005975);; Cellular Component: integral component of membrane (GO:0016021);; Molecular Function: transferase activity (GO:0016740);;	K01193|0|bdi:100839920|K01193 beta-fructofuranosidase [EC:3.2.1.26] | (RefSeq) sucrose:sucrose 1-fructosyltransferase-like	Galactose metabolism (ko00052);; Starch and sucrose metabolism (ko00500)	Sucrose:sucrose 1-fructosyltransferase OS=Festuca arundinacea OX=4606 GN=1-SST PE=1 SV=1	acid beta-fructofuranosidase precursor [Triticum aestivum]
TraesCS2B02G204600	[M]	Cell wall/membrane/envelope biogenesis	Molecular Function: 3-beta-hydroxy-delta5-steroid dehydrogenase activity (GO:0003854);; Biological Process: steroid biosynthetic process (GO:0006694);; Molecular Function: coenzyme binding (GO:0050662);; Biological Process: oxidation-reduction process (GO:0055114);;	--	--	Putative anthocyanidin reductase OS=Ginkgo biloba OX=3311 PE=2 SV=1	anthocyanidin reductase ((2S)-flavan-3-ol-forming)-like [Aegilops tauschii subsp. tauschii]
Triticum_aestivum_newGene_101572	--	--	Molecular Function: ADP binding (GO:0043531);;	--	--	--	CNL6 [Triticum monococcum subsp. monococcum]
TraesCS3B02G490700	--	--	Cellular Component: integral component of membrane (GO:0016021);;	--	--	--	unnamed protein product [Triticum aestivum]
TraesCS2B02G369000	[R]	General function prediction only	Biological Process: polysaccharide catabolic process (GO:0000272);; Molecular Function: chitinase activity (GO:0004568);; Biological Process: chitin catabolic process (GO:0006032);; Biological Process: defense response (GO:0006952);; Molecular Function: chitin binding (GO:0008061);; Biological Process: cell wall macromolecule catabolic process (GO:0016998);; Biological Process: response to other …	K01183|1.94123e-107|bdi:100841292|K01183 chitinase [EC:3.2.1.14] | (RefSeq) chitinase 5-like	Amino sugar and nucleotide sugar metabolism (ko00520)	Chitinase 4 OS=Oryza sativa subsp. japonica OX=39947 GN=Cht4 PE=2 SV=2	chitinase 5-like [Aegilops tauschii subsp. tauschii]
TraesCS1B02G395100	--	--	Cellular Component: plastid (GO:0009536);;	--	--	--	uncharacterized protein LOC109774767 [Aegilops tauschii subsp. tauschii]
Triticum_aestivum_newGene_71660	--	--	--	--	--	Suppressor of RPS4-RLD 1 OS=Arabidopsis thaliana OX=3702 GN=SRFR1 PE=1 SV=1	hypothetical protein TRIUR3_08798 [Triticum urartu]
Triticum_aestivum_newGene_57206	[G]	Carbohydrate transport and metabolism	Molecular Function: biotin-[acetyl-CoA-carboxylase] ligase activity (GO:0004077);; Biological Process: cellular protein modification process (GO:0006464);;	--	--	Xylose isomerase OS=Hordeum vulgare OX=4513 GN=XYLA PE=1 SV=1	xylose isomerase-like isoform X3 [Aegilops tauschii subsp. tauschii]
Triticum_aestivum_newGene_68967	--	--	--	--	--	--	replication protein A 70 kDa DNA-binding subunit B-like [Aegilops tauschii subsp. tauschii]
Triticum_aestivum_newGene_67793	--	--	Biological Process: regulation of transcription, DNA-templated (GO:0006355);; Cellular Component: intracellular membrane-bounded organelle (GO:0043231);; Molecular Function: sequence-specific DNA binding (GO:0043565);;	--	--	Zinc finger BED domain-containing protein RICESLEEPER 1 OS=Oryza sativa subsp. japonica OX=39947 GN=Os05g0239150 PE=3 SV=1	PREDICTED: zinc finger BED domain-containing protein RICESLEEPER 2-like [Oryza sativa Japonica Group]
Triticum_aestivum_newGene_74621	--	--	--	--	--	--	uncharacterized protein LOC109781241 [Aegilops tauschii subsp. tauschii]
TraesCS1B02G309100	--	--	--	--	--	--	uncharacterized protein LOC109786683 [Aegilops tauschii subsp. tauschii]
TraesCS3B02G213000	[R]	General function prediction only	Molecular Function: catalytic activity (GO:0003824);; Biological Process: biosynthetic process (GO:0009058);;	--	--	--	unnamed protein product [Triticum aestivum]
TraesCS1D02G187100	[I]	Lipid transport and metabolism	Molecular Function: hydrolase activity (GO:0016787);;	--	--	--	uncharacterized protein LOC109761971 [Aegilops tauschii subsp. tauschii]
TraesCS2B02G280500	[V]	Defense mechanisms	Biological Process: drug transmembrane transport (GO:0006855);; Molecular Function: drug transmembrane transporter activity (GO:0015238);; Molecular Function: antiporter activity (GO:0015297);; Cellular Component: integral component of membrane (GO:0016021);;	K03327|0|bdi:100827736|K03327 multidrug resistance protein, MATE family | (RefSeq) protein DETOXIFICATION 18-like	--	Protein DETOXIFICATION 19 OS=Arabidopsis thaliana OX=3702 GN=DTX19 PE=2 SV=1	protein DETOXIFICATION 18-like [Aegilops tauschii subsp. tauschii]
Triticum_aestivum_newGene_86850	--	--	Molecular Function: DNA binding (GO:0003677);; Molecular Function: RNA binding (GO:0003723);; Molecular Function: RNA-directed DNA polymerase activity (GO:0003964);; Molecular Function: RNA-DNA hybrid ribonuclease activity (GO:0004523);; Biological Process: RNA-dependent DNA biosynthetic process (GO:0006278);; Biological Process: DNA recombination (GO:0006310);;	--	--	Homogentisate geranylgeranyltransferase OS=Triticum aestivum OX=4565 GN=HGGT PE=2 SV=1	OSJNBa0035O13.3 [Oryza sativa Japonica Group]
TraesCS3B02G158200	--	--	Molecular Function: DNA binding (GO:0003677);; Cellular Component: integral component of membrane (GO:0016021);;	--	--	VQ motif-containing protein 4 OS=Arabidopsis thaliana OX=3702 GN=VQ4 PE=1 SV=1	predicted protein, partial [Hordeum vulgare subsp. vulgare]
TraesCS6A02G141800	--	--	Cellular Component: plastid (GO:0009536);;	--	--	Putative E3 ubiquitin-protein ligase LIN-1 OS=Lotus japonicus OX=34305 GN=CERBERUS PE=2 SV=2	putative E3 ubiquitin-protein ligase LIN-1 [Aegilops tauschii subsp. tauschii]
TraesCS4B02G193500	[O]	Posttranslational modification, protein turnover, chaperones	Cellular Component: endoplasmic reticulum lumen (GO:0005788);; Biological Process: response to heat (GO:0009408);; Cellular Component: plasmodesma (GO:0009506);; Biological Process: pollen tube growth (GO:0009860);; Molecular Function: oxidoreductase activity (GO:0016491);; Biological Process: oxidation-reduction process (GO:0055114);;	--	--	DnaJ protein ERDJ3A OS=Oryza sativa subsp. japonica OX=39947 GN=ERDJ3A PE=1 SV=2	hypothetical protein [Triticum turgidum]
TraesCS3B02G429900	--	--	Cellular Component: integral component of membrane (GO:0016021);;	--	--	Formin-like protein 1 OS=Oryza sativa subsp. japonica OX=39947 GN=FH1 PE=2 SV=1	unnamed protein product [Triticum aestivum]
TraesCS4A02G173800	--	--	Molecular Function: chitinase activity (GO:0004568);; Cellular Component: extracellular region (GO:0005576);; Biological Process: chitin catabolic process (GO:0006032);; Molecular Function: chitin binding (GO:0008061);; Biological Process: xylan catabolic process (GO:0045493);;	K01183|6.31e-147|bdi:100840859|K01183 chitinase [EC:3.2.1.14] | (RefSeq) xylanase inhibitor protein 1-like	Amino sugar and nucleotide sugar metabolism (ko00520)	Xylanase inhibitor protein 1 OS=Oryza sativa subsp. japonica OX=39947 GN=RIXI PE=1 SV=1	xylanase inhibitor [Triticum aestivum]
Triticum_aestivum_newGene_87169	--	--	Cellular Component: integral component of membrane (GO:0016021);; Molecular Function: hydrolase activity (GO:0016787);;	--	--	Probable inactive purple acid phosphatase 29 OS=Arabidopsis thaliana OX=3702 GN=PAP29 PE=2 SV=1	Phosphatase DCR2 [Zea mays]
TraesCS2B02G471900	[T]	Signal transduction mechanisms	Molecular Function: ubiquitin-protein transferase activity (GO:0004842);; Biological Process: protein ubiquitination (GO:0016567);;	--	--	E3 ubiquitin-protein ligase PUB22 OS=Arabidopsis thaliana OX=3702 GN=PUB22 PE=1 SV=1	E3 ubiquitin-protein ligase PUB23-like [Aegilops tauschii subsp. tauschii]
TraesCS1B02G236000	--	--	Molecular Function: protein kinase activity (GO:0004672);; Molecular Function: ATP binding (GO:0005524);; Biological Process: protein phosphorylation (GO:0006468);; Cellular Component: integral component of membrane (GO:0016021);;	--	--	Probable inactive receptor-like protein kinase At3g56050 OS=Arabidopsis thaliana OX=3702 GN=At3g56050 PE=2 SV=1	probable inactive receptor-like protein kinase At3g56050 [Aegilops tauschii subsp. tauschii]
TraesCS3D02G514300	[R]	General function prediction only	Molecular Function: catalytic activity (GO:0003824);; Molecular Function: coenzyme binding (GO:0050662);;	--	--	3-oxo-Delta(4,5)-steroid 5-beta-reductase OS=Digitalis lanata OX=49450 PE=1 SV=1	3-oxo-Delta(4,5)-steroid 5-beta-reductase-like [Aegilops tauschii subsp. tauschii]
TraesCS3A02G500600	[L]	Replication, recombination and repair	Cellular Component: nuclear chromatin (GO:0000790);; Cellular Component: synaptonemal complex (GO:0000795);; Molecular Function: single-stranded DNA binding (GO:0003697);; Molecular Function: ATP binding (GO:0005524);; Cellular Component: chiasma (GO:0005712);; Biological Process: mismatch repair (GO:0006298);; Biological Process: mitotic recombination (GO:0006312);; Biological Process: pollen de…	K08734|0|bdi:100845473|K08734 DNA mismatch repair protein MLH1 | (RefSeq) MLH1; DNA mismatch repair protein MLH1	Mismatch repair (ko03430)	DNA mismatch repair protein MLH1 OS=Arabidopsis thaliana OX=3702 GN=MLH1 PE=2 SV=1	DNA mismatch repair protein MLH1-like [Aegilops tauschii subsp. tauschii]
Triticum_aestivum_newGene_70366	--	--	--	K02936|2.00913e-06|dosa:Os01t0924800-00|K02936 large subunit ribosomal protein L7Ae | (RAP-DB) Os01g0924800; Similar to 60S ribosomal protein l7a (Fragment).	Ribosome (ko03010)	60S ribosomal protein L7a-2 OS=Oryza sativa subsp. japonica OX=39947 GN=RPL7A-2 PE=2 SV=1	--
Triticum_aestivum_newGene_82536	--	--	--	--	--	--	uncharacterized protein LOC109755260 [Aegilops tauschii subsp. tauschii]
TraesCS5B02G552600	--	--	--	--	--	Uncharacterized protein At4g14100 OS=Arabidopsis thaliana OX=3702 GN=At4g14100 PE=2 SV=1	predicted protein [Hordeum vulgare subsp. vulgare]
TraesCS2B02G189100	[HR]	Coenzyme transport and metabolism;; General function prediction only	Cellular Component: plastid (GO:0009536);; Molecular Function: hydrolase activity (GO:0016787);;	--	--	--	uncharacterized protein LOC109776563 [Aegilops tauschii subsp. tauschii]
TraesCS4A02G250500	--	--	--	--	--	--	uncharacterized protein LOC109776753 [Aegilops tauschii subsp. tauschii]
TraesCS6D02G403400	--	--	--	--	--	--	low-temperature-induced 65 kDa protein-like [Aegilops tauschii subsp. tauschii]
TraesCS4D02G325800	--	--	Molecular Function: DNA binding (GO:0003677);; Cellular Component: nucleus (GO:0005634);; Biological Process: regulation of transcription, DNA-templated (GO:0006355);;	--	--	NAC domain-containing protein 22 OS=Oryza sativa subsp. japonica OX=39947 GN=NAC022 PE=2 SV=1	NAC domain-containing protein 72-like [Aegilops tauschii subsp. tauschii]
TraesCS4D02G063200	--	--	--	--	--	--	uncharacterized protein LOC109776753 [Aegilops tauschii subsp. tauschii]
Triticum_aestivum_newGene_93829	--	--	--	--	--	--	wiskott-Aldrich syndrome protein-like [Aegilops tauschii subsp. tauschii]
Triticum_aestivum_newGene_71456	--	--	--	--	--	--	uncharacterized protein LOC109765358 [Aegilops tauschii subsp. tauschii]
TraesCS3B02G412500	--	--	Molecular Function: DNA binding (GO:0003677);; Molecular Function: transcription factor activity, sequence-specific DNA binding (GO:0003700);; Cellular Component: nucleus (GO:0005634);; Biological Process: regulation of transcription, DNA-templated (GO:0006355);;	--	--	Ethylene-responsive transcription factor ERF110 OS=Arabidopsis thaliana OX=3702 GN=ERF110 PE=2 SV=2	F-box domain containing protein, expressed [Triticum aestivum]
Triticum_aestivum_newGene_64701	--	--	--	K12879|5.54221e-39|osa:4324336|K12879 THO complex subunit 2 | (RefSeq) THO complex subunit 2	RNA transport (ko03013);; Spliceosome (ko03040)	THO complex subunit 2 OS=Arabidopsis thaliana OX=3702 GN=THO2 PE=1 SV=1	THO complex subunit 2-like isoform X3 [Aegilops tauschii subsp. tauschii]
Triticum_aestivum_newGene_6509	--	--	--	--	--	--	uncharacterized protein LOC109781667 [Aegilops tauschii subsp. tauschii]
TraesCS6B02G279600	[FH]	Nucleotide transport and metabolism;; Coenzyme transport and metabolism	Cellular Component: plasma membrane (GO:0005886);; Cellular Component: plastid envelope (GO:0009526);; Molecular Function: nucleobase transmembrane transporter activity (GO:0015205);; Biological Process: nucleobase transport (GO:0015851);; Cellular Component: integral component of membrane (GO:0016021);; Biological Process: pyrimidine nucleobase salvage (GO:0043100);; Biological Process: transmem…	K03457|0|bdi:100837265|K03457 nucleobase:cation symporter-1, NCS1 family | (RefSeq) purine-uracil permease NCS1	--	Purine-uracil permease NCS1 OS=Arabidopsis thaliana OX=3702 GN=NCS1 PE=1 SV=1	purine-uracil permease NCS1-like [Aegilops tauschii subsp. tauschii]
Triticum_aestivum_newGene_31103	--	--	--	--	--	--	hypothetical protein TRIUR3_30797 [Triticum urartu]
TraesCS7B02G022100	[O]	Posttranslational modification, protein turnover, chaperones	Molecular Function: serine-type endopeptidase activity (GO:0004252);; Biological Process: proteolysis (GO:0006508);;	--	--	Putative protease Do-like 14 OS=Arabidopsis thaliana OX=3702 GN=DEGP14 PE=3 SV=2	uncharacterized protein LOC109784475 [Aegilops tauschii subsp. tauschii]
TraesCS5D02G432500	--	--	--	--	--	Transcription factor PCF6 OS=Oryza sativa subsp. japonica OX=39947 GN=PCF6 PE=2 SV=1	transcription factor PCF6-like [Aegilops tauschii subsp. tauschii]
Triticum_aestivum_newGene_68113	--	--	Cellular Component: integral component of membrane (GO:0016021);;	--	--	--	uncharacterized protein LOC109754179 [Aegilops tauschii subsp. tauschii]
TraesCS2B02G515900	[B]	Chromatin structure and dynamics	--	K15223|1.69963e-136|osa:4337317|K15223 upstream activation factor subunit UAF30 | (RefSeq) uncharacterized LOC4337317	--	--	formin-like protein 1 [Aegilops tauschii subsp. tauschii]
TraesCS7A02G442300	--	--	Molecular Function: ubiquitin-protein transferase activity (GO:0004842);; Cellular Component: nucleus (GO:0005634);; Molecular Function: zinc ion binding (GO:0008270);; Biological Process: protein ubiquitination (GO:0016567);; Biological Process: regulation of defense response (GO:0031347);;	K19042|5.19477e-62|bdi:100837320|K19042 E3 ubiquitin-protein ligase BOI and related proteins [EC:2.3.2.27] | (RefSeq) probable BOI-related E3 ubiquitin-protein ligase 3	--	E3 ubiquitin-protein ligase BOI OS=Arabidopsis thaliana OX=3702 GN=BOI PE=1 SV=1	E3 ubiquitin-protein ligase BOI-like [Aegilops tauschii subsp. tauschii]
Triticum_aestivum_newGene_23358	--	--	--	K11374|3.99921e-09|sita:101779393|K11374 elongator complex protein 2 | (RefSeq) elongator complex protein 2	--	--	elongator complex protein 2 [Aegilops tauschii subsp. tauschii]
TraesCS5D02G504200	--	--	--	--	--	--	uncharacterized protein LOC109751753 [Aegilops tauschii subsp. tauschii]
TraesCS7A02G234000	--	--	Molecular Function: peroxidase activity (GO:0004601);; Cellular Component: extracellular region (GO:0005576);; Cellular Component: mitochondrion (GO:0005739);; Biological Process: response to oxidative stress (GO:0006979);; Cellular Component: plant-type cell wall (GO:0009505);; Biological Process: plant-type cell wall organization (GO:0009664);; Molecular Function: heme binding (GO:0020037);; Bi…	--	--	Peroxidase 5 OS=Vitis vinifera OX=29760 GN=GSVIVT00037159001 PE=1 SV=2	peroxidase 5-like [Aegilops tauschii subsp. tauschii]
TraesCS4B02G356300	--	--	--	--	--	F-box protein PP2-A13 OS=Arabidopsis thaliana OX=3702 GN=PP2A13 PE=1 SV=1	F-box protein PP2-A13-like [Aegilops tauschii subsp. tauschii]
TraesCS2D02G157800	[QV]	Secondary metabolites biosynthesis, transport and catabolism;; Defense mechanisms	Molecular Function: monooxygenase activity (GO:0004497);; Molecular Function: iron ion binding (GO:0005506);; Cellular Component: integral component of membrane (GO:0016021);; Molecular Function: oxidoreductase activity, acting on paired donors, with incorporation or reduction of molecular oxygen (GO:0016705);; Molecular Function: heme binding (GO:0020037);; Biological Process: oxidation-reductio…	K20660|0|bdi:100826419|K20660 cytochrome P450 family 709 | (RefSeq) cytochrome P450 734A6-like	--	Cytochrome P450 709B1 OS=Arabidopsis thaliana OX=3702 GN=CYP709B1 PE=2 SV=1	cytochrome P450 709B1-like [Aegilops tauschii subsp. tauschii]
Triticum_aestivum_newGene_50264	--	--	Biological Process: developmental process (GO:0032502);;	--	--	--	hypothetical protein OsJ_10256 [Oryza sativa Japonica Group]
TraesCS5B02G504000	[G]	Carbohydrate transport and metabolism	Cellular Component: extracellular region (GO:0005576);; Molecular Function: mannan endo-1,4-beta-mannosidase activity (GO:0016985);; Biological Process: mannan catabolic process (GO:0046355);;	K19355|0|bdi:100831892|K19355 mannan endo-1,4-beta-mannosidase [EC:3.2.1.78] | (RefSeq) mannan endo-1,4-beta-mannosidase 3-like	Fructose and mannose metabolism (ko00051)	Mannan endo-1,4-beta-mannosidase 4 OS=Oryza sativa subsp. japonica OX=39947 GN=MAN4 PE=2 SV=2	mannan endo-1,4-beta-mannosidase 3-like [Aegilops tauschii subsp. tauschii]
Triticum_aestivum_newGene_82540	--	--	--	--	--	--	zinc finger MYM-type protein 1-like [Aegilops tauschii subsp. tauschii]
TraesCS1D02G020700	--	--	Molecular Function: transferase activity, transferring acyl groups other than amino-acyl groups (GO:0016747);;	--	--	Malonyl-coenzyme A:anthocyanin 3-O-glucoside-6&apos;&apos;-O-malonyltransferase OS=Dahlia pinnata OX=101596 GN=3MAT PE=1 SV=1	malonyl-coenzyme A:anthocyanin 3-O-glucoside-6&apos;&apos;-O-malonyltransferase-like [Aegilops tauschii subsp. tauschii]
TraesCS2A02G338800	--	--	Cellular Component: integral component of membrane (GO:0016021);;	K15015|4.83472e-168|sita:101763276|K15015 solute carrier family 32 (vesicular inhibitory amino acid transporter) | (RefSeq) vacuolar amino acid transporter 1-like	--	Amino acid transporter AVT1I OS=Arabidopsis thaliana OX=3702 GN=AVT1I PE=3 SV=1	vacuolar amino acid transporter 1-like [Aegilops tauschii subsp. tauschii]
TraesCS3A02G046000	--	--	Molecular Function: serine-type endopeptidase inhibitor activity (GO:0004867);; Cellular Component: extracellular region (GO:0005576);; Biological Process: negative regulation of endopeptidase activity (GO:0010951);;	--	--	Bowman-Birk type trypsin inhibitor OS=Hordeum vulgare OX=4513 GN=BBBI PE=1 SV=1	Bowman-Birk type trypsin inhibitor [Triticum urartu]
TraesCS5A02G498900	--	--	Cellular Component: extracellular region (GO:0005576);; Cellular Component: plant-type cell wall (GO:0009505);; Cellular Component: plasmodesma (GO:0009506);; Cellular Component: membrane (GO:0016020);;	--	--	Expansin-like A1 OS=Oryza sativa subsp. japonica OX=39947 GN=EXLA1 PE=2 SV=1	expansin-like A1 isoform X1 [Aegilops tauschii subsp. tauschii]
TraesCS3B02G370600	--	--	--	--	--	--	unnamed protein product [Triticum aestivum]
TraesCS5A02G353400	--	--	Molecular Function: nutrient reservoir activity (GO:0045735);;	--	--	11S globulin seed storage protein 2 OS=Sesamum indicum OX=4182 PE=2 SV=1	11S globulin seed storage protein 2-like [Aegilops tauschii subsp. tauschii]
TraesCS3B02G063000	--	--	Biological Process: lipid transport (GO:0006869);; Molecular Function: lipid binding (GO:0008289);;	--	--	Non-specific lipid-transfer protein 4.3 OS=Hordeum vulgare OX=4513 GN=LTP4.3 PE=2 SV=1	unnamed protein product [Triticum aestivum]
Triticum_aestivum_newGene_68388	--	--	--	--	--	--	PREDICTED: uncharacterized protein LOC100843843 isoform X1 [Brachypodium distachyon]
TraesCS3B02G013000	--	--	--	--	--	--	unnamed protein product [Triticum aestivum]
TraesCS3A02G215400	[E]	Amino acid transport and metabolism	Biological Process: dephosphorylation (GO:0016311);; Molecular Function: phosphatase activity (GO:0016791);;	K13248|3.77842e-170|bdi:100838589|K13248 pyridoxal phosphate phosphatase PHOSPHO2 [EC:3.1.3.74] | (RefSeq) inorganic pyrophosphatase 3	Vitamin B6 metabolism (ko00750)	Inorganic pyrophosphatase 2 OS=Arabidopsis thaliana OX=3702 GN=At1g17710 PE=2 SV=1	thiamine phosphate phosphatase-like protein [Aegilops tauschii subsp. tauschii]
Triticum_aestivum_newGene_17808	--	--	--	--	--	--	hypothetical protein TRIUR3_10557 [Triticum urartu]
TraesCS3A02G390400	--	--	Cellular Component: plastid (GO:0009536);;	--	--	BAG family molecular chaperone regulator 4 OS=Arabidopsis thaliana OX=3702 GN=BAG4 PE=1 SV=1	BAG family molecular chaperone regulator 4-like [Aegilops tauschii subsp. tauschii]
TraesCS1A02G043900	[DPM]	Cell cycle control, cell division, chromosome partitioning;; Inorganic ion transport and metabolism;; Cell wall/membrane/envelope biogenesis	Molecular Function: copper ion binding (GO:0005507);; Molecular Function: oxidoreductase activity, oxidizing metal ions (GO:0016722);; Biological Process: lignin catabolic process (GO:0046274);; Cellular Component: apoplast (GO:0048046);; Molecular Function: hydroquinone:oxygen oxidoreductase activity (GO:0052716);; Biological Process: oxidation-reduction process (GO:0055114);;	K05909|0|sbi:SORBI_08g011530|K05909 laccase [EC:1.10.3.2] | (RefSeq) SORBIDRAFT_08g011530, Sb08g011530; hypothetical protein	--	Laccase-25 OS=Oryza sativa subsp. japonica OX=39947 GN=LAC25 PE=3 SV=1	laccase-25-like isoform X2 [Aegilops tauschii subsp. tauschii]
TraesCS5D02G149400	--	--	--	--	--	Mini zinc finger protein 1 OS=Oryza sativa subsp. japonica OX=39947 GN=MIF1 PE=3 SV=1	mini zinc finger protein 1-like [Aegilops tauschii subsp. tauschii]
Triticum_aestivum_newGene_71139	[L]	Replication, recombination and repair	Biological Process: telomere maintenance (GO:0000723);; Molecular Function: DNA helicase activity (GO:0003678);; Molecular Function: ATP binding (GO:0005524);; Biological Process: DNA repair (GO:0006281);; Cellular Component: plastid (GO:0009536);; Biological Process: DNA duplex unwinding (GO:0032508);;	--	--	--	hypothetical protein SETIT_012162mg [Setaria italica]
Triticum_aestivum_newGene_101685	--	--	--	--	--	--	hypothetical protein TRIUR3_28028 [Triticum urartu]
Triticum_aestivum_newGene_68936	--	--	--	--	--	--	uncharacterized protein LOC109741123 [Aegilops tauschii subsp. tauschii]
TraesCS2B02G339200	--	--	--	--	--	--	uncharacterized protein LOC109761249 [Aegilops tauschii subsp. tauschii]
TraesCS2B02G302400	[OT]	Posttranslational modification, protein turnover, chaperones;; Signal transduction mechanisms	Biological Process: metabolic process (GO:0008152);; Molecular Function: amino acid binding (GO:0016597);;	--	--	ACT domain-containing protein ACR4 OS=Arabidopsis thaliana OX=3702 GN=ACR4 PE=2 SV=1	ACT domain-containing protein ACR6-like [Aegilops tauschii subsp. tauschii]
Triticum_aestivum_newGene_8547	--	--	Molecular Function: DNA binding (GO:0003677);; Cellular Component: mitochondrion (GO:0005739);; Biological Process: DNA recombination (GO:0006310);; Molecular Function: electron carrier activity (GO:0009055);; Cellular Component: plastid (GO:0009536);; Biological Process: DNA integration (GO:0015074);; Cellular Component: integral component of membrane (GO:0016021);; Biological Process: electron …	--	--	Retrovirus-related Pol polyprotein from transposon RE1 OS=Arabidopsis thaliana OX=3702 GN=RE1 PE=2 SV=1	Os08g0544300 [Oryza sativa Japonica Group]
TraesCS2A02G460200	--	--	Molecular Function: transcription factor activity, sequence-specific DNA binding (GO:0003700);; Cellular Component: nucleus (GO:0005634);; Biological Process: regulation of transcription, DNA-templated (GO:0006355);; Biological Process: hormone biosynthetic process (GO:0042446);; Molecular Function: sequence-specific DNA binding (GO:0043565);; Biological Process: regulation of secondary shoot for…	--	--	Nodulation-signaling pathway 1 protein OS=Medicago truncatula OX=3880 GN=NSP1 PE=1 SV=1	nodulation-signaling pathway 1 protein [Aegilops tauschii subsp. tauschii]
TraesCS2A02G288000	--	--	Molecular Function: DNA binding (GO:0003677);; Molecular Function: transcription factor activity, sequence-specific DNA binding (GO:0003700);; Cellular Component: nucleus (GO:0005634);; Biological Process: regulation of transcription, DNA-templated (GO:0006355);; Cellular Component: plastid (GO:0009536);;	--	--	Ethylene-responsive transcription factor ERF113 OS=Arabidopsis thaliana OX=3702 GN=ERF113 PE=2 SV=1	ethylene-responsive transcription factor ERF113-like [Aegilops tauschii subsp. tauschii]
Triticum_aestivum_newGene_98808	--	--	Cellular Component: membrane (GO:0016020);;	--	--	--	predicted protein [Hordeum vulgare subsp. vulgare]
TraesCS3A02G352100	--	--	--	--	--	Uncharacterized protein At4g08330, chloroplastic OS=Arabidopsis thaliana OX=3702 GN=At4g08330 PE=1 SV=1	uncharacterized protein At4g08330, chloroplastic-like [Aegilops tauschii subsp. tauschii]
TraesCS6A02G244700	[FH]	Nucleotide transport and metabolism;; Coenzyme transport and metabolism	Cellular Component: plasma membrane (GO:0005886);; Cellular Component: plastid envelope (GO:0009526);; Molecular Function: nucleobase transmembrane transporter activity (GO:0015205);; Biological Process: nucleobase transport (GO:0015851);; Cellular Component: integral component of membrane (GO:0016021);; Biological Process: pyrimidine nucleobase salvage (GO:0043100);; Biological Process: transmem…	K03457|0|bdi:100837265|K03457 nucleobase:cation symporter-1, NCS1 family | (RefSeq) purine-uracil permease NCS1	--	Purine-uracil permease NCS1 OS=Arabidopsis thaliana OX=3702 GN=NCS1 PE=1 SV=1	purine-uracil permease NCS1-like [Aegilops tauschii subsp. tauschii]
TraesCS3B02G550300	--	--	--	--	--	--	uncharacterized protein LOC109779201 [Aegilops tauschii subsp. tauschii]
TraesCS2B02G518300	--	--	Molecular Function: agmatine N4-coumaroyltransferase activity (GO:0047634);;	--	--	Agmatine coumaroyltransferase-2 OS=Hordeum vulgare OX=4513 GN=ACT-2 PE=1 SV=1	agmatine coumaroyltransferase-2-like [Aegilops tauschii subsp. tauschii]
TraesCS4A02G282900	[P]	Inorganic ion transport and metabolism	Molecular Function: ATP binding (GO:0005524);; Cellular Component: integral component of plasma membrane (GO:0005887);; Biological Process: ATP biosynthetic process (GO:0006754);; Molecular Function: hydrogen-exporting ATPase activity, phosphorylative mechanism (GO:0008553);; Cellular Component: intracellular membrane-bounded organelle (GO:0043231);; Molecular Function: metal ion binding (GO:0046…	K01535|0|bdi:100844944|K01535 H+-transporting ATPase [EC:3.6.3.6] | (RefSeq) plasma membrane ATPase 1-like	Oxidative phosphorylation (ko00190)	Plasma membrane ATPase 1 OS=Solanum lycopersicum OX=4081 GN=LHA1 PE=2 SV=1	Plasma membrane ATPase 1 [Triticum urartu]
TraesCS4D02G026300	[F]	Nucleotide transport and metabolism	Cellular Component: cytosol (GO:0005829);; Biological Process: proteolysis (GO:0006508);; Biological Process: glutamine metabolic process (GO:0006541);; Molecular Function: peptidase activity (GO:0008233);; Molecular Function: transferase activity (GO:0016740);; Biological Process: glucosinolate metabolic process (GO:0019760);;	--	--	Gamma-glutamyl peptidase 5 OS=Arabidopsis thaliana OX=3702 GN=GGP5 PE=2 SV=1	gamma-glutamyl peptidase 5-like [Aegilops tauschii subsp. tauschii]
TraesCS4D02G227400	--	--	--	--	--	Thaumatin-like protein 1 OS=Arabidopsis thaliana OX=3702 GN=TLP1 PE=2 SV=1	thaumatin-like protein 1b [Aegilops tauschii subsp. tauschii]
TraesCS5D02G488800	[H]	Coenzyme transport and metabolism	Biological Process: lignin biosynthetic process (GO:0009809);; Biological Process: flavonoid biosynthetic process (GO:0009813);; Molecular Function: catechol O-methyltransferase activity (GO:0016206);; Biological Process: methylation (GO:0032259);; Molecular Function: protein dimerization activity (GO:0046983);;	K13066|0|bdi:100842290|K13066 caffeic acid 3-O-methyltransferase [EC:2.1.1.68] | (RefSeq) tricetin 3',4',5'-O-trimethyltransferase-like	Phenylpropanoid biosynthesis (ko00940)	Tricetin 3&apos;,4&apos;,5&apos;-O-trimethyltransferase OS=Triticum aestivum OX=4565 GN=OMT2 PE=1 SV=1	tricetin 3&apos;,4&apos;,5&apos;-O-trimethyltransferase-like [Aegilops tauschii subsp. tauschii]
TraesCS3B02G561100	--	--	Molecular Function: nucleotide binding (GO:0000166);; Cellular Component: membrane (GO:0016020);;	K14794|0|bdi:100843447|K14794 ribosomal RNA-processing protein 12 | (RefSeq) ribosomal RNA-processing protein 12-like	--	--	unnamed protein product [Triticum aestivum]
TraesCS2B02G220900	[T]	Signal transduction mechanisms	Molecular Function: protein serine/threonine kinase activity (GO:0004674);; Molecular Function: ATP binding (GO:0005524);; Biological Process: protein phosphorylation (GO:0006468);; Cellular Component: integral component of membrane (GO:0016021);; Molecular Function: carbohydrate binding (GO:0030246);;	--	--	L-type lectin-domain containing receptor kinase IV.1 OS=Arabidopsis thaliana OX=3702 GN=LECRK41 PE=2 SV=1	L-type lectin-domain containing receptor kinase IV.1-like [Aegilops tauschii subsp. tauschii]
TraesCS2B02G449100	[G]	Carbohydrate transport and metabolism	Cellular Component: integral component of membrane (GO:0016021);; Molecular Function: substrate-specific transmembrane transporter activity (GO:0022891);; Biological Process: transmembrane transport (GO:0055085);;	--	--	Organic cation/carnitine transporter 7 OS=Arabidopsis thaliana OX=3702 GN=OCT7 PE=2 SV=1	predicted protein, partial [Hordeum vulgare subsp. vulgare]
TraesCSU02G082000	[M]	Cell wall/membrane/envelope biogenesis	Biological Process: sucrose metabolic process (GO:0005985);; Molecular Function: sucrose synthase activity (GO:0016157);;	K00695|0|bdi:100821418|K00695 sucrose synthase [EC:2.4.1.13] | (RefSeq) sucrose synthase 7-like	Starch and sucrose metabolism (ko00500)	Sucrose synthase 7 OS=Oryza sativa subsp. japonica OX=39947 GN=SUS7 PE=2 SV=2	Sucrose synthase 2 [Triticum urartu]
TraesCS3A02G239100	--	--	--	--	--	F-box/kelch-repeat protein At3g61590 OS=Arabidopsis thaliana OX=3702 GN=At3g61590 PE=1 SV=1	predicted protein, partial [Hordeum vulgare subsp. vulgare]
TraesCS7B02G311500	--	--	Cellular Component: endomembrane system (GO:0012505);; Cellular Component: integral component of membrane (GO:0016021);; Cellular Component: membrane-bounded organelle (GO:0043227);; Cellular Component: intracellular organelle (GO:0043229);; Cellular Component: cytoplasmic part (GO:0044444);; Biological Process: recognition of pollen (GO:0048544);;	--	--	PAN domain-containing protein At5g03700 OS=Arabidopsis thaliana OX=3702 GN=At5g03700 PE=1 SV=1	PAN domain-containing protein At5g03700-like [Aegilops tauschii subsp. tauschii]
Triticum_aestivum_newGene_75371	--	--	--	--	--	--	uncharacterized protein LOC109752612 [Aegilops tauschii subsp. tauschii]
TraesCS2B02G119000	--	--	Molecular Function: DNA binding (GO:0003677);; Cellular Component: nucleus (GO:0005634);; Biological Process: regulation of transcription, DNA-templated (GO:0006355);;	--	--	NAC domain-containing protein 10 OS=Oryza sativa subsp. japonica OX=39947 GN=NAC010 PE=2 SV=1	NAC transcription factor NAM-B1-like [Aegilops tauschii subsp. tauschii]
TraesCS5A02G241300	[T]	Signal transduction mechanisms	Molecular Function: protein serine/threonine kinase activity (GO:0004674);; Molecular Function: ATP binding (GO:0005524);; Biological Process: protein phosphorylation (GO:0006468);; Cellular Component: plastid (GO:0009536);;	--	--	Receptor-like cytoplasmic kinase 176 OS=Oryza sativa subsp. japonica OX=39947 GN=RLCK176 PE=1 SV=1	Protein kinase APK1B, chloroplastic [Triticum urartu]
TraesCS2B02G310800	[T]	Signal transduction mechanisms	Cellular Component: integral component of membrane (GO:0016021);; Molecular Function: hydrolase activity (GO:0016787);;	--	--	--	uncharacterized protein LOC109744460 [Aegilops tauschii subsp. tauschii]
Triticum_aestivum_newGene_77208	--	--	Biological Process: metabolic process (GO:0008152);; Molecular Function: transferase activity, transferring phosphorus-containing groups (GO:0016772);;	--	--	--	uncharacterized protein LOC109771748 [Aegilops tauschii subsp. tauschii]
TraesCS2D02G374400	[G]	Carbohydrate transport and metabolism	Biological Process: flavonoid biosynthetic process (GO:0009813);; Cellular Component: intracellular membrane-bounded organelle (GO:0043231);; Biological Process: flavonoid glucuronidation (GO:0052696);; Molecular Function: quercetin 3-O-glucosyltransferase activity (GO:0080043);; Molecular Function: quercetin 7-O-glucosyltransferase activity (GO:0080044);;	--	--	UDP-glycosyltransferase 73C5 OS=Arabidopsis thaliana OX=3702 GN=UGT73C5 PE=2 SV=1	UDP-glycosyltransferase 73C6-like [Aegilops tauschii subsp. tauschii]
TraesCS2A02G367300	[O]	Posttranslational modification, protein turnover, chaperones	Molecular Function: protein serine/threonine kinase activity (GO:0004674);; Molecular Function: ATP binding (GO:0005524);; Biological Process: protein phosphorylation (GO:0006468);; Cellular Component: integral component of membrane (GO:0016021);; Biological Process: recognition of pollen (GO:0048544);;	--	--	G-type lectin S-receptor-like serine/threonine-protein kinase At2g19130 OS=Arabidopsis thaliana OX=3702 GN=At2g19130 PE=2 SV=1	predicted protein [Hordeum vulgare subsp. vulgare]
Triticum_aestivum_newGene_23824	--	--	--	--	--	--	RNA-binding motif protein, X chromosome-like [Aegilops tauschii subsp. tauschii]
TraesCS6B02G116700	[C]	Energy production and conversion	Molecular Function: L-lactate dehydrogenase activity (GO:0004459);; Cellular Component: cytosol (GO:0005829);; Cellular Component: plasma membrane (GO:0005886);; Biological Process: glycolytic process (GO:0006096);; Biological Process: oxidation-reduction process (GO:0055114);;	K00016|2.20657e-148|bdi:100846734|K00016 L-lactate dehydrogenase [EC:1.1.1.27] | (RefSeq) L-lactate dehydrogenase B	Glycolysis / Gluconeogenesis (ko00010);; Cysteine and methionine metabolism (ko00270);; Pyruvate metabolism (ko00620);; Propanoate metabolism (ko00640)	L-lactate dehydrogenase A OS=Hordeum vulgare OX=4513 PE=1 SV=1	predicted protein [Hordeum vulgare subsp. vulgare]
TraesCS6A02G374400	--	--	Cellular Component: chloroplast thylakoid membrane (GO:0009535);; Cellular Component: photosystem II oxygen evolving complex (GO:0009654);; Biological Process: photosynthesis (GO:0015979);; Cellular Component: integral component of membrane (GO:0016021);;	K03541|4.17097e-57|bdi:100831067|K03541 photosystem II 10kDa protein | (RefSeq) photosystem II 10 kDa polypeptide, chloroplastic-like	Photosynthesis (ko00195)	Photosystem II 10 kDa polypeptide, chloroplastic OS=Hordeum vulgare OX=4513 GN=PSBR PE=3 SV=1	photosystem II 10 kDa polypeptide, chloroplastic [Aegilops tauschii subsp. tauschii]
TraesCS4B02G305800	[H]	Coenzyme transport and metabolism	Molecular Function: prenyltransferase activity (GO:0004659);; Cellular Component: chloroplast (GO:0009507);; Biological Process: photosynthetic electron transport in photosystem II (GO:0009772);; Biological Process: plastoquinone biosynthetic process (GO:0010236);; Cellular Component: integral component of membrane (GO:0016021);; Biological Process: phylloquinone biosynthetic process (GO:0042372)…	K02548|0|bdi:100820840|K02548 1,4-dihydroxy-2-naphthoate octaprenyltransferase [EC:2.5.1.74 2.5.1.-] | (RefSeq) 1,4-dihydroxy-2-naphthoate polyprenyltransferase, chloroplastic	Ubiquinone and other terpenoid-quinone biosynthesis (ko00130)	2-carboxy-1,4-naphthoquinone phytyltransferase, chloroplastic OS=Arabidopsis thaliana OX=3702 GN=ABC4 PE=1 SV=2	2-carboxy-1,4-naphthoquinone phytyltransferase, chloroplastic-like [Aegilops tauschii subsp. tauschii]
Triticum_aestivum_newGene_55367	--	--	--	--	--	--	hypothetical protein GOBAR_AA35378 [Gossypium barbadense]
TraesCS3D02G228400	[V]	Defense mechanisms	Cellular Component: mitochondrion (GO:0005739);; Biological Process: cellular ion homeostasis (GO:0006873);; Molecular Function: voltage-gated anion channel activity (GO:0008308);; Cellular Component: integral component of membrane (GO:0016021);; Biological Process: regulation of anion transmembrane transport (GO:1903959);;	--	--	S-type anion channel SLAH3 OS=Arabidopsis thaliana OX=3702 GN=SLAH3 PE=1 SV=1	S-type anion channel SLAH2-like [Aegilops tauschii subsp. tauschii]
TraesCS2B02G407600	--	--	Molecular Function: transcription factor activity, sequence-specific DNA binding (GO:0003700);; Cellular Component: nucleus (GO:0005634);; Biological Process: regulation of transcription, DNA-templated (GO:0006355);; Molecular Function: sequence-specific DNA binding (GO:0043565);;	--	--	Homeobox-leucine zipper protein HOX22 OS=Oryza sativa subsp. japonica OX=39947 GN=HOX22 PE=2 SV=2	homeobox-leucine zipper protein HOX22-like [Aegilops tauschii subsp. tauschii]
TraesCS5D02G209600	--	--	Biological Process: regionalization (GO:0003002);; Cellular Component: nucleus (GO:0005634);; Cellular Component: mitochondrion (GO:0005739);; Biological Process: regulation of transcription, DNA-templated (GO:0006355);; Biological Process: abaxial cell fate specification (GO:0010158);; Biological Process: inflorescence development (GO:0010229);; Molecular Function: transcription regulatory regio…	--	--	Probable transcription factor RL9 OS=Oryza sativa subsp. japonica OX=39947 GN=RL9 PE=2 SV=2	probable transcription factor RL9 [Aegilops tauschii subsp. tauschii]
TraesCS3D02G279500	[G]	Carbohydrate transport and metabolism	Biological Process: flavonoid biosynthetic process (GO:0009813);; Cellular Component: intracellular membrane-bounded organelle (GO:0043231);; Biological Process: flavonoid glucuronidation (GO:0052696);; Molecular Function: quercetin 3-O-glucosyltransferase activity (GO:0080043);; Molecular Function: quercetin 7-O-glucosyltransferase activity (GO:0080044);;	--	--	Phloretin 2&apos;-O-glucosyltransferase OS=Pyrus communis OX=23211 GN=UGT88F2 PE=1 SV=1	phloretin 2&apos;-O-glucosyltransferase-like [Aegilops tauschii subsp. tauschii]
TraesCS7D02G316700	[S]	Function unknown	Molecular Function: glucosylceramidase activity (GO:0004348);; Biological Process: glucosylceramide catabolic process (GO:0006680);; Cellular Component: membrane (GO:0016020);;	K17108|0|bdi:100834417|K17108 non-lysosomal glucosylceramidase [EC:3.2.1.45] | (RefSeq) non-lysosomal glucosylceramidase-like	Other glycan degradation (ko00511);; Sphingolipid metabolism (ko00600)	--	non-lysosomal glucosylceramidase-like [Aegilops tauschii subsp. tauschii]
TraesCS5A02G141700	--	--	Molecular Function: DNA binding (GO:0003677);; Molecular Function: transcription factor activity, sequence-specific DNA binding (GO:0003700);; Cellular Component: nucleus (GO:0005634);; Biological Process: regulation of transcription, DNA-templated (GO:0006355);; Biological Process: multicellular organism development (GO:0007275);; Cellular Component: plastid (GO:0009536);;	K09285|1.01847e-165|bdi:100846864|K09285 AP2-like factor, ANT lineage | (RefSeq) ethylene-responsive transcription factor WRI1-like	--	Ethylene-responsive transcription factor WRI1 OS=Arabidopsis thaliana OX=3702 GN=WRI1 PE=2 SV=1	Ethylene-responsive transcription factor WRI1 [Triticum urartu]
TraesCS2B02G481200	--	--	--	--	--	--	uncharacterized protein LOC109752973 [Aegilops tauschii subsp. tauschii]
Triticum_aestivum_newGene_68804	--	--	--	--	--	--	uncharacterized protein LOC109755195 [Aegilops tauschii subsp. tauschii]
Triticum_aestivum_newGene_3107	--	--	Biological Process: regulation of transcription, DNA-templated (GO:0006355);; Molecular Function: zinc ion binding (GO:0008270);;	--	--	Protein FAR1-RELATED SEQUENCE 4 OS=Arabidopsis thaliana OX=3702 GN=FRS4 PE=2 SV=2	protein FAR1-RELATED SEQUENCE 3-like [Aegilops tauschii subsp. tauschii]
TraesCS3B02G611600	[CP]	Energy production and conversion;; Inorganic ion transport and metabolism	Molecular Function: magnesium ion binding (GO:0000287);; Molecular Function: inorganic diphosphatase activity (GO:0004427);; Cellular Component: cytoplasm (GO:0005737);; Biological Process: phosphate-containing compound metabolic process (GO:0006796);;	K01507|3.3524e-141|bdi:100842635|K01507 inorganic pyrophosphatase [EC:3.6.1.1] | (RefSeq) soluble inorganic pyrophosphatase 4	Oxidative phosphorylation (ko00190)	Soluble inorganic pyrophosphatase 4 OS=Arabidopsis thaliana OX=3702 GN=PPA4 PE=1 SV=1	soluble inorganic pyrophosphatase 4-like [Aegilops tauschii subsp. tauschii]
TraesCS4A02G435300	[O]	Posttranslational modification, protein turnover, chaperones	Molecular Function: glutathione transferase activity (GO:0004364);; Cellular Component: cytoplasm (GO:0005737);; Biological Process: glutathione metabolic process (GO:0006749);; Biological Process: toxin catabolic process (GO:0009407);;	K00799|4.12923e-99|bdi:100841867|K00799 glutathione S-transferase [EC:2.5.1.18] | (RefSeq) uncharacterized LOC100841867	Glutathione metabolism (ko00480)	Probable glutathione S-transferase GSTU6 OS=Oryza sativa subsp. japonica OX=39947 GN=GSTU6 PE=2 SV=2	probable glutathione S-transferase GSTU6 [Aegilops tauschii subsp. tauschii]
TraesCS7B02G454000	--	--	--	--	--	--	cell wall protein IFF6-like isoform X2 [Aegilops tauschii subsp. tauschii]
TraesCS2B02G332400	--	--	Biological Process: deadenylation-dependent decapping of nuclear-transcribed mRNA (GO:0000290);; Molecular Function: RNA cap binding (GO:0000339);; Cellular Component: P-body (GO:0000932);; Cellular Component: nucleus (GO:0005634);; Cellular Component: integral component of membrane (GO:0016021);; Cellular Component: viral nucleocapsid (GO:0019013);;	K12620|1.53674e-84|bdi:100824555|K12620 U6 snRNA-associated Sm-like protein LSm1 | (RefSeq) sm-like protein LSM1B	RNA degradation (ko03018)	Sm-like protein LSM1B OS=Arabidopsis thaliana OX=3702 GN=LSM1B PE=1 SV=1	sm-like protein LSM1B [Aegilops tauschii subsp. tauschii]
TraesCS3A02G389700	--	--	Molecular Function: binding (GO:0005488);; Cellular Component: membrane part (GO:0044425);;	--	--	Phytolongin Phyl1.1 OS=Arabidopsis thaliana OX=3702 GN=PHYL1.1 PE=2 SV=1	phytolongin Phyl1.1-like [Aegilops tauschii subsp. tauschii]
TraesCS2B02G354400	[Q]	Secondary metabolites biosynthesis, transport and catabolism	Molecular Function: copper ion binding (GO:0005507);; Cellular Component: peroxisome (GO:0005777);; Molecular Function: primary amine oxidase activity (GO:0008131);; Biological Process: amine metabolic process (GO:0009308);; Molecular Function: quinone binding (GO:0048038);; Biological Process: oxidation-reduction process (GO:0055114);;	K00276|0|bdi:100837848|K00276 primary-amine oxidase [EC:1.4.3.21] | (RefSeq) copper methylamine oxidase-like	Glycine, serine and threonine metabolism (ko00260);; Tyrosine metabolism (ko00350);; Phenylalanine metabolism (ko00360);; beta-Alanine metabolism (ko00410);; Isoquinoline alkaloid biosynthesis (ko00950);; Tropane, piperidine and pyridine alkaloid biosynthesis (ko00960)	Primary amine oxidase (Fragment) OS=Lens culinaris OX=3864 PE=1 SV=3	uncharacterized protein LOC109771221 [Aegilops tauschii subsp. tauschii]
TraesCS3A02G263300	[J]	Translation, ribosomal structure and biogenesis	Cellular Component: mitochondrion (GO:0005739);; Biological Process: tRNA modification (GO:0006400);; Cellular Component: plastid (GO:0009536);; Molecular Function: tRNA dimethylallyltransferase activity (GO:0052381);; Molecular Function: ATP dimethylallyltransferase activity (GO:0052622);; Molecular Function: ADP dimethylallyltransferase activity (GO:0052623);;	K10760|5.08089e-177|bdi:100835937|K10760 adenylate dimethylallyltransferase (cytokinin synthase) [EC:2.5.1.27 2.5.1.112] | (RefSeq) adenylate isopentenyltransferase-like	Zeatin biosynthesis (ko00908)	Adenylate isopentenyltransferase 1, chloroplastic OS=Arabidopsis thaliana OX=3702 GN=IPT1 PE=1 SV=2	adenylate isopentenyltransferase-like [Aegilops tauschii subsp. tauschii]
TraesCS5A02G347000	--	--	Molecular Function: zinc ion binding (GO:0008270);;	--	--	--	zinc finger protein 598-like [Aegilops tauschii subsp. tauschii]
TraesCS3B02G556600	--	--	Cellular Component: integral component of membrane (GO:0016021);; Molecular Function: transferase activity, transferring glycosyl groups (GO:0016757);;	--	--	--	unnamed protein product [Triticum aestivum]
TraesCS6B02G429500	[I]	Lipid transport and metabolism	Biological Process: metabolic process (GO:0008152);; Molecular Function: hydrolase activity (GO:0016787);;	--	--	Probable carboxylesterase 15 OS=Arabidopsis thaliana OX=3702 GN=CXE15 PE=2 SV=1	predicted protein [Hordeum vulgare subsp. vulgare]
TraesCS2A02G094700	[M]	Cell wall/membrane/envelope biogenesis	Biological Process: galactose metabolic process (GO:0006012);; Molecular Function: inositol 3-alpha-galactosyltransferase activity (GO:0047216);;	K18819|0|obr:102722231|K18819 inositol 3-alpha-galactosyltransferase [EC:2.4.1.123] | (RefSeq) galactinol synthase 2-like	Galactose metabolism (ko00052)	Galactinol synthase 2 OS=Arabidopsis thaliana OX=3702 GN=GOLS2 PE=1 SV=1	Glycogenin-2 [Triticum urartu]
TraesCS6D02G144800	[K]	Transcription	Molecular Function: protein kinase activity (GO:0004672);; Molecular Function: ATP binding (GO:0005524);; Biological Process: protein phosphorylation (GO:0006468);; Cellular Component: integral component of membrane (GO:0016021);;	--	--	Probable LRR receptor-like serine/threonine-protein kinase At4g31250 OS=Arabidopsis thaliana OX=3702 GN=At4g31250 PE=2 SV=1	pollen receptor-like kinase 5 [Aegilops tauschii subsp. tauschii]
TraesCS7A02G387100	[E]	Amino acid transport and metabolism	Biological Process: cellular amino acid metabolic process (GO:0006520);; Molecular Function: carboxy-lyase activity (GO:0016831);; Molecular Function: pyridoxal phosphate binding (GO:0030170);;	K01592|0|bdi:100832786|K01592 tyrosine decarboxylase [EC:4.1.1.25] | (RefSeq) aromatic-L-amino-acid decarboxylase-like	Tyrosine metabolism (ko00350);; Isoquinoline alkaloid biosynthesis (ko00950)	Aromatic-L-amino-acid decarboxylase OS=Catharanthus roseus OX=4058 GN=TDC PE=2 SV=1	Aromatic-L-amino-acid decarboxylase [Triticum urartu]
TraesCS6A02G382500	--	--	Cellular Component: integral component of plasma membrane (GO:0005887);; Biological Process: carbohydrate transmembrane transport (GO:0034219);; Molecular Function: sugar transmembrane transporter activity (GO:0051119);;	K15382|7.27509e-90|bdi:100831065|K15382 solute carrier family 50 (sugar transporter) | (RefSeq) bidirectional sugar transporter SWEET13-like	--	Bidirectional sugar transporter SWEET13 OS=Oryza sativa subsp. japonica OX=39947 GN=SWEET13 PE=2 SV=1	bidirectional sugar transporter SWEET13-like [Aegilops tauschii subsp. tauschii]
TraesCS6A02G120600	--	--	Molecular Function: transcription factor activity, sequence-specific DNA binding (GO:0003700);; Cellular Component: nucleus (GO:0005634);; Biological Process: regulation of transcription, DNA-templated (GO:0006355);; Cellular Component: plastid (GO:0009536);; Molecular Function: sequence-specific DNA binding (GO:0043565);;	--	--	Putative homeobox-leucine zipper protein HOX26 OS=Oryza sativa subsp. japonica OX=39947 GN=HOX26 PE=3 SV=1	Putative homeobox-leucine zipper protein HOX26 [Triticum urartu]
TraesCS3B02G402200	--	--	Biological Process: amino acid transmembrane transport (GO:0003333);; Molecular Function: amine transmembrane transporter activity (GO:0005275);; Cellular Component: plasma membrane (GO:0005886);; Molecular Function: gamma-aminobutyric acid transmembrane transporter activity (GO:0015185);; Biological Process: gamma-aminobutyric acid transport (GO:0015812);; Cellular Component: integral component …	--	--	GABA transporter 1 OS=Arabidopsis thaliana OX=3702 GN=GAT1 PE=1 SV=1	unnamed protein product [Triticum aestivum]
TraesCS6B02G146200	--	--	Cellular Component: plastid (GO:0009536);;	--	--	Protein CHLOROPLAST IMPORT APPARATUS 2 OS=Arabidopsis thaliana OX=3702 GN=CIA2 PE=1 SV=1	protein CHLOROPLAST IMPORT APPARATUS 2-like isoform X1 [Aegilops tauschii subsp. tauschii]
TraesCS4B02G367600	--	--	--	--	--	Lipid transfer protein EARLI 1 OS=Arabidopsis thaliana OX=3702 GN=EARLI1 PE=1 SV=1	glycine-rich protein 5-like [Aegilops tauschii subsp. tauschii]
TraesCS1A02G304000	--	--	Molecular Function: transcription factor activity, sequence-specific DNA binding (GO:0003700);; Cellular Component: nucleus (GO:0005634);; Biological Process: regulation of transcription, DNA-templated (GO:0006355);; Molecular Function: sequence-specific DNA binding (GO:0043565);;	--	--	Protein SCARECROW OS=Arabidopsis thaliana OX=3702 GN=SCR PE=1 SV=1	protein SCARECROW-like [Aegilops tauschii subsp. tauschii]
Triticum_aestivum_newGene_52749	--	--	Biological Process: drug transmembrane transport (GO:0006855);; Molecular Function: drug transmembrane transporter activity (GO:0015238);; Molecular Function: antiporter activity (GO:0015297);; Cellular Component: integral component of membrane (GO:0016021);;	K03327|2.31482e-157|bdi:100824345|K03327 multidrug resistance protein, MATE family | (RefSeq) protein DETOXIFICATION 16-like	--	Protein DETOXIFICATION 16 OS=Arabidopsis thaliana OX=3702 GN=DTX16 PE=2 SV=1	protein DETOXIFICATION 16-like [Aegilops tauschii subsp. tauschii]
Triticum_aestivum_newGene_68448	--	--	--	--	--	--	hypothetical protein TRIUR3_31846 [Triticum urartu]
TraesCS3B02G142200	[V]	Defense mechanisms	Molecular Function: ATP binding (GO:0005524);; Cellular Component: integral component of membrane (GO:0016021);; Molecular Function: ATPase activity, coupled to transmembrane movement of substances (GO:0042626);; Biological Process: transmembrane transport (GO:0055085);;	--	--	ABC transporter C family member 8 OS=Arabidopsis thaliana OX=3702 GN=ABCC8 PE=2 SV=3	ABC transporter C family member 8-like isoform X1 [Aegilops tauschii subsp. tauschii]
TraesCS1B02G093400	--	--	Cellular Component: integral component of membrane (GO:0016021);;	--	--	--	uncharacterized protein LOC109774794 [Aegilops tauschii subsp. tauschii]
TraesCS4A02G059800	[EH]	Amino acid transport and metabolism;; Coenzyme transport and metabolism	Biological Process: branched-chain amino acid metabolic process (GO:0009081);; Molecular Function: L-leucine transaminase activity (GO:0052654);; Molecular Function: L-valine transaminase activity (GO:0052655);; Molecular Function: L-isoleucine transaminase activity (GO:0052656);;	K00826|0|bdi:100839637|K00826 branched-chain amino acid aminotransferase [EC:2.6.1.42] | (RefSeq) branched-chain-amino-acid aminotransferase 3, chloroplastic	Cysteine and methionine metabolism (ko00270);; Valine, leucine and isoleucine degradation (ko00280);; Valine, leucine and isoleucine biosynthesis (ko00290);; Pantothenate and CoA biosynthesis (ko00770);; 2-Oxocarboxylic acid metabolism (ko01210);; Biosynthesis of amino acids (ko01230)	Branched-chain-amino-acid aminotransferase 3, chloroplastic OS=Arabidopsis thaliana OX=3702 GN=BCAT3 PE=1 SV=1	Branched-chain-amino-acid aminotransferase 3, chloroplastic [Triticum urartu]
Triticum_aestivum_newGene_70560	--	--	--	--	--	--	uncharacterized protein LOC109753120 [Aegilops tauschii subsp. tauschii]
TraesCS2B02G137500	[T]	Signal transduction mechanisms	Molecular Function: kinase activity (GO:0016301);; Biological Process: phosphorylation (GO:0016310);;	--	--	Hsp70-Hsp90 organizing protein 3 OS=Arabidopsis thaliana OX=3702 GN=HOP3 PE=2 SV=1	serine/threonine-protein phosphatase 6 regulatory ankyrin repeat subunit B-like [Aegilops tauschii subsp. tauschii]
TraesCS4B02G235300	--	--	Molecular Function: DNA binding (GO:0003677);; Biological Process: transcription, DNA-templated (GO:0006351);;	K09338|5.0451e-70|osa:4332147|K09338 homeobox-leucine zipper protein | (RefSeq) Hox19, OJ1017C11.5, OJ1781E12.8, OsHox19; homeobox-leucine zipper protein HOX19	--	Homeobox-leucine zipper protein HOX19 OS=Oryza sativa subsp. japonica OX=39947 GN=HOX19 PE=2 SV=1	homeobox-leucine zipper protein HOX19-like [Aegilops tauschii subsp. tauschii]
Triticum_aestivum_newGene_90503	--	--	--	--	--	Putative F-box/LRR-repeat protein At3g58880 OS=Arabidopsis thaliana OX=3702 GN=At3g58880 PE=4 SV=1	uncharacterized protein LOC109749406 isoform X1 [Aegilops tauschii subsp. tauschii]
TraesCS3D02G502400	--	--	Molecular Function: ADP binding (GO:0043531);;	--	--	Disease resistance protein RPS2 OS=Arabidopsis thaliana OX=3702 GN=RPS2 PE=1 SV=1	probable disease resistance protein At1g61300 [Aegilops tauschii subsp. tauschii]
TraesCS5A02G246900	--	--	Cellular Component: plastid (GO:0009536);;	--	--	GLABRA2 expression modulator OS=Arabidopsis thaliana OX=3702 GN=GEM PE=1 SV=1	GLABRA2 expression modulator-like [Aegilops tauschii subsp. tauschii]
TraesCS7A02G432200	--	--	--	--	--	--	paramyosin-like [Aegilops tauschii subsp. tauschii]
TraesCS5A02G399700	[O]	Posttranslational modification, protein turnover, chaperones	Molecular Function: serine-type endopeptidase activity (GO:0004252);; Cellular Component: cell wall (GO:0005618);; Biological Process: proteolysis (GO:0006508);;	--	--	Subtilisin-like protease SBT1.7 OS=Arabidopsis thaliana OX=3702 GN=SBT1.7 PE=1 SV=1	subtilisin-like protease SBT1.7 [Aegilops tauschii subsp. tauschii]
TraesCS3B02G144600	--	--	Molecular Function: UDP-glycosyltransferase activity (GO:0008194);; Biological Process: flavonoid biosynthetic process (GO:0009813);; Molecular Function: transferase activity, transferring hexosyl groups (GO:0016758);; Cellular Component: intracellular membrane-bounded organelle (GO:0043231);; Biological Process: flavonoid glucuronidation (GO:0052696);;	--	--	UDP-glycosyltransferase 73C1 OS=Arabidopsis thaliana OX=3702 GN=UGT73C1 PE=2 SV=1	zeatin O-glucosyltransferase 3, partial [Triticum aestivum]
TraesCS2D02G540500	--	--	Cellular Component: cytoplasm (GO:0005737);; Biological Process: metal ion transport (GO:0030001);; Molecular Function: transition metal ion binding (GO:0046914);; Biological Process: cellular transition metal ion homeostasis (GO:0046916);;	--	--	Heavy metal-associated isoprenylated plant protein 39 OS=Arabidopsis thaliana OX=3702 GN=HIPP39 PE=2 SV=1	heavy metal-associated isoprenylated plant protein 39-like [Aegilops tauschii subsp. tauschii]
TraesCS4D02G238600	[C]	Energy production and conversion	Cellular Component: cell wall (GO:0005618);; Cellular Component: cytosol (GO:0005829);; Cellular Component: plasma membrane (GO:0005886);; Cellular Component: plasmodesma (GO:0009506);; Biological Process: oxygen transport (GO:0015671);; Molecular Function: oxygen binding (GO:0019825);; Molecular Function: heme binding (GO:0020037);; Molecular Function: metal ion binding (GO:0046872);;	--	--	Non-symbiotic hemoglobin OS=Hordeum vulgare OX=4513 GN=HB PE=1 SV=1	hemoglobin 1 [Triticum aestivum]
TraesCS3D02G109100	--	--	Molecular Function: DNA binding (GO:0003677);; Cellular Component: nucleus (GO:0005634);; Biological Process: regulation of transcription, DNA-templated (GO:0006355);; Molecular Function: zinc ion binding (GO:0008270);; Biological Process: histone acetylation (GO:0016573);;	--	--	Transcription factor MYBS3 OS=Oryza sativa subsp. japonica OX=39947 GN=MYBS3 PE=2 SV=1	uncharacterized protein LOC109738954 [Aegilops tauschii subsp. tauschii]
TraesCS2A02G375100	--	--	--	--	--	Putative GEM-like protein 8 OS=Arabidopsis thaliana OX=3702 GN=At5g23370 PE=3 SV=1	GEM-like protein 7 [Aegilops tauschii subsp. tauschii]
TraesCS2D02G462700	[G]	Carbohydrate transport and metabolism	Biological Process: flavonoid biosynthetic process (GO:0009813);; Cellular Component: integral component of membrane (GO:0016021);; Cellular Component: intracellular membrane-bounded organelle (GO:0043231);; Biological Process: flavonoid glucuronidation (GO:0052696);; Molecular Function: quercetin 3-O-glucosyltransferase activity (GO:0080043);; Molecular Function: quercetin 7-O-glucosyltransferas…	--	--	UDP-glycosyltransferase 88F3 OS=Pyrus communis OX=23211 GN=UGT88F3 PE=2 SV=1	anthocyanidin 5,3-O-glucosyltransferase-like [Aegilops tauschii subsp. tauschii]
TraesCS5B02G232400	--	--	Biological Process: microtubule cytoskeleton organization (GO:0000226);; Biological Process: cytokinesis (GO:0000910);; Molecular Function: microtubule binding (GO:0008017);;	K16732|0|bdi:100838338|K16732 protein regulator of cytokinesis 1 | (RefSeq) 65-kDa microtubule-associated protein 7-like	--	65-kDa microtubule-associated protein 7 OS=Arabidopsis thaliana OX=3702 GN=MAP65-7 PE=2 SV=1	65-kDa microtubule-associated protein 6-like [Aegilops tauschii subsp. tauschii]
TraesCS4A02G483500	[K]	Transcription	Cellular Component: integral component of membrane (GO:0016021);; Molecular Function: kinase activity (GO:0016301);; Biological Process: phosphorylation (GO:0016310);;	--	--	Receptor-like protein EIX2 OS=Solanum lycopersicum OX=4081 GN=EIX2 PE=1 SV=2	LRR receptor-like serine/threonine-protein kinase GSO2 [Triticum urartu]
TraesCS7D02G199900	[C]	Energy production and conversion	Molecular Function: phosphogluconate dehydrogenase (decarboxylating) activity (GO:0004616);; Molecular Function: pyruvate dehydrogenase (acetyl-transferring) activity (GO:0004739);; Cellular Component: mitochondrial matrix (GO:0005759);; Biological Process: acetyl-CoA biosynthetic process from pyruvate (GO:0006086);; Biological Process: glycolytic process (GO:0006096);; Biological Process: pentos…	K00161|0|bdi:100821082|K00161 pyruvate dehydrogenase E1 component alpha subunit [EC:1.2.4.1] | (RefSeq) pyruvate dehydrogenase E1 component subunit alpha-2, mitochondrial	Glycolysis / Gluconeogenesis (ko00010);; Citrate cycle (TCA cycle) (ko00020);; Pyruvate metabolism (ko00620);; Carbon metabolism (ko01200)	Pyruvate dehydrogenase E1 component subunit alpha-2, mitochondrial OS=Oryza sativa subsp. japonica OX=39947 GN=Os06g0246500 PE=2 SV=1	pyruvate dehydrogenase E1 component subunit alpha-2, mitochondrial [Aegilops tauschii subsp. tauschii]
TraesCS2B02G189900	--	--	Molecular Function: cytochrome-c oxidase activity (GO:0004129);; Cellular Component: mitochondrial respiratory chain complex IV (GO:0005751);; Biological Process: mitochondrial electron transport, cytochrome c to oxygen (GO:0006123);; Biological Process: aerobic respiration (GO:0009060);; Cellular Component: chloroplast (GO:0009507);; Cellular Component: thylakoid (GO:0009579);; Biological Proces…	K02267|2.1262e-64|sita:101781020|K02267 cytochrome c oxidase subunit 6b | (RefSeq) cytochrome c oxidase subunit 6b-1-like	Oxidative phosphorylation (ko00190)	Cytochrome c oxidase subunit 6b-1 OS=Arabidopsis thaliana OX=3702 GN=COX6B-1 PE=1 SV=1	cytochrome c oxidase subunit 6b-1-like [Aegilops tauschii subsp. tauschii]
TraesCS2B02G453400	--	--	Molecular Function: core promoter sequence-specific DNA binding (GO:0001046);; Molecular Function: transcriptional activator activity, RNA polymerase II transcription regulatory region sequence-specific binding (GO:0001228);; Cellular Component: nucleus (GO:0005634);; Biological Process: transcription from RNA polymerase II promoter (GO:0006366);;	--	--	--	uncharacterized protein LOC109774540 [Aegilops tauschii subsp. tauschii]
TraesCS5B02G337100	--	--	Molecular Function: transferase activity, transferring acyl groups other than amino-acyl groups (GO:0016747);;	--	--	Putrescine hydroxycinnamoyltransferase OS=Oryza sativa subsp. japonica OX=39947 GN=Os09g0544000 PE=1 SV=1	putrescine hydroxycinnamoyltransferase-like [Aegilops tauschii subsp. tauschii]
Triticum_aestivum_newGene_91154	--	--	--	--	--	Putative ribonuclease H protein At1g65750 OS=Arabidopsis thaliana OX=3702 GN=At1g65750 PE=3 SV=1	predicted protein [Hordeum vulgare subsp. vulgare]
Triticum_aestivum_newGene_27761	--	--	Molecular Function: binding (GO:0005488);; Molecular Function: transferase activity, transferring phosphorus-containing groups (GO:0016772);; Biological Process: cellular metabolic process (GO:0044237);; Biological Process: single-organism metabolic process (GO:0044710);; Biological Process: organic substance metabolic process (GO:0071704);;	--	--	--	uncharacterized protein LOC109751614 [Aegilops tauschii subsp. tauschii]
TraesCS3D02G522300	[M]	Cell wall/membrane/envelope biogenesis	Cellular Component: exocyst (GO:0000145);; Molecular Function: protein serine/threonine kinase activity (GO:0004674);; Molecular Function: ATP binding (GO:0005524);; Biological Process: protein phosphorylation (GO:0006468);; Biological Process: exocytosis (GO:0006887);; Cellular Component: integral component of membrane (GO:0016021);;	K04733|6.80699e-148|zma:103652674|K04733 interleukin-1 receptor-associated kinase 4 [EC:2.7.11.1] | (RefSeq) mitogen-activated protein kinase kinase kinase 2-like	--	Cysteine-rich receptor-like protein kinase 25 OS=Arabidopsis thaliana OX=3702 GN=CRK25 PE=3 SV=1	putative receptor-like protein kinase At4g00960 [Aegilops tauschii subsp. tauschii]
TraesCS7A02G349900	--	--	--	--	--	--	hypothetical protein TRIUR3_28460 [Triticum urartu]
Triticum_aestivum_newGene_3215	--	--	Biological Process: developmental process (GO:0032502);;	--	--	--	uncharacterized protein LOC109776559 [Aegilops tauschii subsp. tauschii]
TraesCS7A02G113600	[IR]	Lipid transport and metabolism;; General function prediction only	Molecular Function: hydrolase activity, acting on ester bonds (GO:0016788);;	K21026|0|bdi:100833365|K21026 acetylajmaline esterase [EC:3.1.1.80] | (RefSeq) GDSL esterase/lipase At5g45910-like	--	GDSL esterase/lipase At5g45910 OS=Arabidopsis thaliana OX=3702 GN=At5g45910 PE=2 SV=1	GDSL esterase/lipase At5g45910-like [Aegilops tauschii subsp. tauschii]
TraesCS7B02G484900	--	--	Biological Process: response to stress (GO:0006950);; Biological Process: response to water (GO:0009415);;	--	--	Dehydrin DHN3 OS=Hordeum vulgare OX=4513 GN=DHN3 PE=2 SV=1	cold acclimation protein WCOR726 [Triticum aestivum]
Triticum_aestivum_newGene_13375	--	--	--	--	--	--	uncharacterized protein LOC109738389 [Aegilops tauschii subsp. tauschii]
TraesCS4B02G348200	--	--	Cellular Component: extracellular region (GO:0005576);; Biological Process: pathogenesis (GO:0009405);;	--	--	--	pore-forming toxin-like protein Hfr-2 [Triticum aestivum]
TraesCS2D02G326900	[C]	Energy production and conversion	Cellular Component: peroxisome (GO:0005777);; Molecular Function: betaine-aldehyde dehydrogenase activity (GO:0008802);; Molecular Function: aminobutyraldehyde dehydrogenase activity (GO:0019145);; Biological Process: glycine betaine biosynthetic process from choline (GO:0019285);; Molecular Function: 1-pyrroline dehydrogenase activity (GO:0033737);; Biological Process: oxidation-reduction proces…	K00130|0|bdi:100826926|K00130 betaine-aldehyde dehydrogenase [EC:1.2.1.8] | (RefSeq) betaine aldehyde dehydrogenase	Glycine, serine and threonine metabolism (ko00260)	Betaine aldehyde dehydrogenase OS=Hordeum vulgare OX=4513 PE=2 SV=1	betaine aldehyde dehydrogenase [Aegilops tauschii subsp. tauschii]
TraesCS4B02G237300	[C]	Energy production and conversion	Cellular Component: cell wall (GO:0005618);; Cellular Component: cytosol (GO:0005829);; Cellular Component: plasma membrane (GO:0005886);; Cellular Component: plasmodesma (GO:0009506);; Biological Process: oxygen transport (GO:0015671);; Molecular Function: oxygen binding (GO:0019825);; Molecular Function: heme binding (GO:0020037);; Molecular Function: metal ion binding (GO:0046872);;	--	--	Non-symbiotic hemoglobin OS=Hordeum vulgare OX=4513 GN=HB PE=1 SV=1	hemoglobin 1 [Triticum aestivum]
Triticum_aestivum_newGene_68138	--	--	--	--	--	--	hypothetical protein TRIUR3_27416 [Triticum urartu]
Triticum_aestivum_newGene_57443	--	--	Cellular Component: extracellular region (GO:0005576);; Biological Process: pathogenesis (GO:0009405);;	--	--	--	pore-forming toxin-like protein Hfr-2 [Triticum aestivum]
Triticum_aestivum_newGene_69060	--	--	Molecular Function: serine-type carboxypeptidase activity (GO:0004185);; Cellular Component: extracellular region (GO:0005576);; Cellular Component: vacuole (GO:0005773);; Cellular Component: chloroplast thylakoid membrane (GO:0009535);; Biological Process: photosynthesis, light harvesting (GO:0009765);; Cellular Component: integral component of membrane (GO:0016021);; Molecular Function: chlorop…	K16298|8.22439e-15|bdi:100834205|K16298 serine carboxypeptidase-like clade IV [EC:3.4.16.-] | (RefSeq) serine carboxypeptidase 3	--	Serine carboxypeptidase 3 OS=Hordeum vulgare OX=4513 GN=CBP3 PE=1 SV=2	uncharacterized protein LOC109773212 [Aegilops tauschii subsp. tauschii]
TraesCS5D02G229800	[G]	Carbohydrate transport and metabolism	Biological Process: transport (GO:0006810);; Cellular Component: integral component of membrane (GO:0016021);;	--	--	Probable folate-biopterin transporter 6 OS=Arabidopsis thaliana OX=3702 GN=At5g10820 PE=2 SV=1	probable folate-biopterin transporter 6 [Aegilops tauschii subsp. tauschii]
TraesCS4A02G193900	--	--	Molecular Function: calcium ion binding (GO:0005509);; Cellular Component: plastid (GO:0009536);; Cellular Component: integral component of membrane (GO:0016021);;	--	--	Vacuolar-sorting receptor 1 OS=Arabidopsis thaliana OX=3702 GN=VSR1 PE=1 SV=2	vacuolar-sorting receptor 1-like [Aegilops tauschii subsp. tauschii]
Triticum_aestivum_newGene_83524	--	--	--	--	--	--	hypothetical protein OsI_13161 [Oryza sativa Indica Group]
TraesCS2A02G113300	--	--	--	--	--	--	hypothetical protein TRIUR3_34286 [Triticum urartu]
Triticum_aestivum_newGene_100600	--	--	--	--	--	--	uncharacterized protein LOC109732816 [Aegilops tauschii subsp. tauschii]
TraesCS4B02G178100	[M]	Cell wall/membrane/envelope biogenesis	Molecular Function: protein serine/threonine kinase activity (GO:0004674);; Molecular Function: ATP binding (GO:0005524);; Cellular Component: nucleus (GO:0005634);; Cellular Component: mitochondrion (GO:0005739);; Cellular Component: cytosol (GO:0005829);; Biological Process: protein phosphorylation (GO:0006468);; Biological Process: intracellular signal transduction (GO:0035556);;	--	--	CBL-interacting protein kinase 31 OS=Oryza sativa subsp. japonica OX=39947 GN=CIPK31 PE=1 SV=1	CBL-interacting protein kinase 31 [Triticum aestivum]
TraesCS5A02G098400	--	--	Cellular Component: integral component of membrane (GO:0016021);;	--	--	--	myosin-3-like [Aegilops tauschii subsp. tauschii]
TraesCS4B02G344700	[G]	Carbohydrate transport and metabolism	Molecular Function: polygalacturonase activity (GO:0004650);; Cellular Component: extracellular region (GO:0005576);; Biological Process: carbohydrate metabolic process (GO:0005975);; Biological Process: cell wall organization (GO:0071555);;	--	--	Probable polygalacturonase OS=Vitis vinifera OX=29760 GN=GSVIVT00026920001 PE=1 SV=1	probable polygalacturonase [Aegilops tauschii subsp. tauschii]
TraesCS2B02G478700	--	--	Biological Process: transcription, DNA-templated (GO:0006351);;	--	--	Protein REVEILLE 7 OS=Arabidopsis thaliana OX=3702 GN=RVE7 PE=2 SV=1	protein REVEILLE 7-like [Aegilops tauschii subsp. tauschii]
TraesCS2B02G483000	--	--	--	--	--	Cold-regulated protein 2 (Fragment) OS=Hordeum vulgare OX=4513 PE=2 SV=1	pTACR7, partial [Triticum aestivum]
Triticum_aestivum_newGene_75480	--	--	--	--	--	--	uncharacterized protein LOC109781667 [Aegilops tauschii subsp. tauschii]
TraesCS5B02G136900	--	--	Molecular Function: zinc ion binding (GO:0008270);; Cellular Component: integral component of membrane (GO:0016021);; Molecular Function: protein-cysteine S-palmitoyltransferase activity (GO:0019706);;	K16675|0|bdi:100841588|K16675 palmitoyltransferase ZDHHC9/14/18 [EC:2.3.1.225] | (RefSeq) probable protein S-acyltransferase 1	--	Probable protein S-acyltransferase 4 OS=Arabidopsis thaliana OX=3702 GN=PAT04 PE=2 SV=1	predicted protein [Hordeum vulgare subsp. vulgare]
TraesCS3B02G015400	--		Molecular Function: protein serine/threonine kinase activity (GO:0004674);; Molecular Function: protein tyrosine kinase activity (GO:0004713);; Molecular Function: ATP binding (GO:0005524);; Biological Process: protein phosphorylation (GO:0006468);; Cellular Component: membrane (GO:0016020);;	K04733|0|bdi:100839078|K04733 interleukin-1 receptor-associated kinase 4 [EC:2.7.11.1] | (RefSeq) probable receptor-like protein kinase At1g67000	--	Rust resistance kinase Lr10 OS=Triticum aestivum OX=4565 GN=LRK10 PE=2 SV=1	Ser/Thr receptor-like kinase, putative, expressed [Triticum aestivum]
Triticum_aestivum_newGene_26296	--	--	--	--	--	--	hypothetical protein TRIUR3_06757 [Triticum urartu]
TraesCS2B02G216800	[T]	Signal transduction mechanisms	Molecular Function: protein serine/threonine kinase activity (GO:0004674);; Molecular Function: ATP binding (GO:0005524);; Cellular Component: cytosol (GO:0005829);; Biological Process: protein phosphorylation (GO:0006468);; Biological Process: intracellular signal transduction (GO:0035556);;	K08867|0|osa:4343738|K08867 WNK lysine deficient protein kinase [EC:2.7.11.1] | (RefSeq) OJ1127_E01.120, OsJ_023934, OsWNK5, WNK5; probable serine/threonine-protein kinase WNK5	--	Probable serine/threonine-protein kinase WNK5 OS=Oryza sativa subsp. japonica OX=39947 GN=WNK5 PE=2 SV=1	probable serine/threonine-protein kinase WNK5 [Aegilops tauschii subsp. tauschii]
TraesCS2B02G208500	--	--	--	--	--	EID1-like F-box protein 2 OS=Arabidopsis thaliana OX=3702 GN=EDL2 PE=2 SV=1	EID1-like F-box protein 2 [Triticum urartu]
TraesCS6A02G076900	--	--	Biological Process: carbohydrate metabolic process (GO:0005975);; Molecular Function: lyase activity (GO:0016829);;	K01728|1.41761e-08|sita:101774003|K01728 pectate lyase [EC:4.2.2.2] | (RefSeq) putative pectate lyase 21	Pentose and glucuronate interconversions (ko00040)	Beta-glucosidase 32 OS=Oryza sativa subsp. japonica OX=39947 GN=BGLU32 PE=2 SV=2	hypothetical protein TRIUR3_06093 [Triticum urartu]
TraesCS6B02G444300	[O]	Posttranslational modification, protein turnover, chaperones	Molecular Function: metalloendopeptidase activity (GO:0004222);; Biological Process: proteolysis (GO:0006508);; Cellular Component: integral component of membrane (GO:0016021);;	--	--	--	Mitochondrial metalloendopeptidase OMA1 [Triticum urartu]
TraesCS1B02G481400	[K]	Transcription	Molecular Function: O-methyltransferase activity (GO:0008171);; Molecular Function: S-adenosylmethionine-dependent methyltransferase activity (GO:0008757);; Biological Process: aromatic compound biosynthetic process (GO:0019438);;	--	--	Acetylserotonin O-methyltransferase 1 OS=Oryza sativa subsp. japonica OX=39947 GN=ASMT1 PE=1 SV=1	acetylserotonin O-methyltransferase 3-like [Aegilops tauschii subsp. tauschii]
TraesCS5D02G103800	[QR]	Secondary metabolites biosynthesis, transport and catabolism;; General function prediction only	Molecular Function: zinc ion binding (GO:0008270);; Cellular Component: integral component of membrane (GO:0016021);; Molecular Function: 2-alkenal reductase [NAD(P)] activity (GO:0032440);; Biological Process: oxidation-reduction process (GO:0055114);;	--	--	2-alkenal reductase (NADP(+)-dependent) OS=Nicotiana tabacum OX=4097 GN=DBR PE=1 SV=1	2-alkenal reductase (NADP(+)-dependent)-like [Aegilops tauschii subsp. tauschii]
TraesCS1B02G134500	[K]	Transcription	Molecular Function: RNA polymerase III activity (GO:0001056);; Molecular Function: DNA binding (GO:0003677);; Cellular Component: DNA-directed RNA polymerase III complex (GO:0005666);; Biological Process: transcription from RNA polymerase III promoter (GO:0006383);;	K03018|0|bdi:100830443|K03018 DNA-directed RNA polymerase III subunit RPC1 [EC:2.7.7.6] | (RefSeq) DNA-directed RNA polymerase III subunit 1-like	Purine metabolism (ko00230);; Pyrimidine metabolism (ko00240);; RNA polymerase (ko03020)	DNA-directed RNA polymerase III subunit 1 OS=Arabidopsis thaliana OX=3702 GN=NRPC1 PE=2 SV=1	PREDICTED: DNA-directed RNA polymerase III subunit 1-like [Brachypodium distachyon]
Triticum_aestivum_newGene_24418	--	--	--	--	--	--	WAS/WASL-interacting protein family member 3-like isoform X1 [Aegilops tauschii subsp. tauschii]
Triticum_aestivum_newGene_13624	--	--	Molecular Function: DNA binding (GO:0003677);; Cellular Component: mitochondrion (GO:0005739);; Biological Process: DNA recombination (GO:0006310);; Molecular Function: electron carrier activity (GO:0009055);; Cellular Component: plastid (GO:0009536);; Biological Process: DNA integration (GO:0015074);; Cellular Component: integral component of membrane (GO:0016021);; Biological Process: electron …	--	--	Retrovirus-related Pol polyprotein from transposon RE1 OS=Arabidopsis thaliana OX=3702 GN=RE1 PE=2 SV=1	putative copia-like retrotransposon protein [Oryza sativa Japonica Group]
TraesCS7D02G245000	[G]	Carbohydrate transport and metabolism	Cellular Component: mitochondrion (GO:0005739);; Biological Process: carbohydrate metabolic process (GO:0005975);; Molecular Function: beta-glucosidase activity (GO:0008422);; Molecular Function: scopolin beta-glucosidase activity (GO:0102483);; Biological Process: glycosyl compound metabolic process (GO:1901657);;	K01188|0|bdi:100822045|K01188 beta-glucosidase [EC:3.2.1.21] | (RefSeq) beta-glucosidase 28-like	Cyanoamino acid metabolism (ko00460);; Starch and sucrose metabolism (ko00500);; Phenylpropanoid biosynthesis (ko00940)	Beta-glucosidase 28 OS=Oryza sativa subsp. japonica OX=39947 GN=BGLU28 PE=2 SV=1	beta-glucosidase 28-like isoform X1 [Aegilops tauschii subsp. tauschii]
TraesCS6A02G254100	--	--	Biological Process: amino acid transmembrane transport (GO:0003333);; Molecular Function: amino acid transmembrane transporter activity (GO:0015171);; Cellular Component: integral component of membrane (GO:0016021);;	K14209|0|bdi:100831435|K14209 solute carrier family 36 (proton-coupled amino acid transporter) | (RefSeq) amino acid transporter ANTL2-like	--	Amino acid transporter AVT3B OS=Arabidopsis thaliana OX=3702 GN=AVT3B PE=2 SV=1	amino acid transporter ANTL1-like [Aegilops tauschii subsp. tauschii]
TraesCS7A02G264100	--	--	--	--	--	Ethylene-responsive transcription factor ERF115 OS=Arabidopsis thaliana OX=3702 GN=ERF115 PE=1 SV=1	ethylene-responsive transcription factor RAP2-6-like [Aegilops tauschii subsp. tauschii]
TraesCS5B02G120800	--	--	Biological Process: amino acid transmembrane transport (GO:0003333);; Cellular Component: plasma membrane (GO:0005886);; Molecular Function: amino acid transmembrane transporter activity (GO:0015171);; Cellular Component: integral component of membrane (GO:0016021);;	--	--	Amino acid permease 6 OS=Arabidopsis thaliana OX=3702 GN=AAP6 PE=1 SV=1	amino acid permease 6-like [Aegilops tauschii subsp. tauschii]
TraesCS3A02G488200	[O]	Posttranslational modification, protein turnover, chaperones	Molecular Function: glutathione transferase activity (GO:0004364);; Cellular Component: cytoplasm (GO:0005737);; Biological Process: glutathione metabolic process (GO:0006749);; Biological Process: toxin catabolic process (GO:0009407);;	K00799|7.17942e-95|sita:101773133|K00799 glutathione S-transferase [EC:2.5.1.18] | (RefSeq) glutathione transferase GST 23-like	Glutathione metabolism (ko00480)	Probable glutathione S-transferase OS=Glycine max OX=3847 GN=HSP26-A PE=2 SV=1	glutathione S-transferase U8-like [Aegilops tauschii subsp. tauschii]
TraesCS6D02G077600	[G]	Carbohydrate transport and metabolism	Molecular Function: glycopeptide alpha-N-acetylgalactosaminidase activity (GO:0033926);;	--	--	Cytosolic invertase 1 OS=Oryza sativa subsp. japonica OX=39947 GN=CINV1 PE=1 SV=1	probable alkaline/neutral invertase F [Aegilops tauschii subsp. tauschii]
Triticum_aestivum_newGene_16738	--	--	--	--	--	--	hypothetical protein BRADI_4g00747v3 [Brachypodium distachyon]
Triticum_aestivum_newGene_32345	--	--	Molecular Function: ADP binding (GO:0043531);;	--	--	--	putative disease resistance protein At1g58400 [Aegilops tauschii subsp. tauschii]
TraesCS5B02G242700	[G]	Carbohydrate transport and metabolism	--	--	--	--	uncharacterized protein LOC109747483 isoform X1 [Aegilops tauschii subsp. tauschii]
TraesCS2B02G259400	[J]	Translation, ribosomal structure and biogenesis	Molecular Function: nucleotide binding (GO:0000166);; Molecular Function: nucleic acid binding (GO:0003676);; Molecular Function: zinc ion binding (GO:0008270);;	K12885|7.25784e-116|bdi:100823909|K12885 heterogeneous nuclear ribonucleoprotein G | (RefSeq) glycine-rich RNA-binding protein RZ1C-like	Spliceosome (ko03040)	Glycine-rich RNA-binding protein RZ1B OS=Arabidopsis thaliana OX=3702 GN=RZ1B PE=2 SV=1	Glycine-rich RNA-binding protein 2 [Triticum urartu]
TraesCS2D02G370800	[G]	Carbohydrate transport and metabolism	Cellular Component: integral component of plasma membrane (GO:0005887);; Biological Process: water transport (GO:0006833);; Cellular Component: plant-type vacuole membrane (GO:0009705);; Biological Process: cellular water homeostasis (GO:0009992);; Molecular Function: water channel activity (GO:0015250);; Molecular Function: glycerol channel activity (GO:0015254);; Biological Process: glycerol tr…	K09873|2.30316e-99|bdi:100830688|K09873 aquaporin TIP | (RefSeq) probable aquaporin TIP3-2	--	Probable aquaporin TIP3-2 OS=Oryza sativa subsp. japonica OX=39947 GN=TIP3-2 PE=2 SV=2	probable aquaporin TIP3-2 [Aegilops tauschii subsp. tauschii]
TraesCS5D02G081000	--	--	Molecular Function: DNA binding (GO:0003677);; Cellular Component: nucleus (GO:0005634);; Biological Process: regulation of transcription, DNA-templated (GO:0006355);;	--	--	Myb family transcription factor EFM OS=Arabidopsis thaliana OX=3702 GN=EFM PE=1 SV=2	myb family transcription factor EFM-like [Aegilops tauschii subsp. tauschii]
TraesCS5B02G184600	[T]	Signal transduction mechanisms	Molecular Function: nucleotide binding (GO:0000166);; Molecular Function: protein kinase activity (GO:0004672);; Cellular Component: membrane (GO:0016020);; Biological Process: phosphorylation (GO:0016310);;	--	--	Probable kinase CHARK OS=Oryza sativa subsp. japonica OX=39947 GN=CHARK PE=2 SV=1	L-type lectin-domain containing receptor kinase IX.2-like isoform X1 [Aegilops tauschii subsp. tauschii]
TraesCS1B02G363500	[QV]	Secondary metabolites biosynthesis, transport and catabolism;; Defense mechanisms	Molecular Function: monooxygenase activity (GO:0004497);; Molecular Function: iron ion binding (GO:0005506);; Cellular Component: mitochondrion (GO:0005739);; Cellular Component: integral component of membrane (GO:0016021);; Molecular Function: oxidoreductase activity, acting on paired donors, with incorporation or reduction of molecular oxygen (GO:0016705);; Molecular Function: heme binding (GO:…	--	--	Cytochrome P450 72A15 OS=Arabidopsis thaliana OX=3702 GN=CYP72A15 PE=2 SV=1	cytochrome P450 [Triticum aestivum]
TraesCS7B02G268100	[P]	Inorganic ion transport and metabolism	Cellular Component: plastid (GO:0009536);;	--	--	--	predicted protein [Hordeum vulgare subsp. vulgare]
Triticum_aestivum_newGene_95309	--	--	Molecular Function: nucleic acid binding (GO:0003676);; Biological Process: DNA integration (GO:0015074);;	--	--	Retrovirus-related Pol polyprotein from transposon RE1 OS=Arabidopsis thaliana OX=3702 GN=RE1 PE=2 SV=1	uncharacterized protein LOC109779124 [Aegilops tauschii subsp. tauschii]
TraesCS2D02G073400	[C]	Energy production and conversion	Cellular Component: mitochondrion (GO:0005739);; Biological Process: metabolic process (GO:0008152);; Molecular Function: zinc ion binding (GO:0008270);; Molecular Function: acetyltransferase activity (GO:0016407);;	K09699|0|bdi:100837376|K09699 2-oxoisovalerate dehydrogenase E2 component (dihydrolipoyl transacylase) [EC:2.3.1.168] | (RefSeq) lipoamide acyltransferase component of branched-chain alpha-keto acid dehydrogenase complex, mitochondrial	Valine, leucine and isoleucine degradation (ko00280);; Propanoate metabolism (ko00640)	Lipoamide acyltransferase component of branched-chain alpha-keto acid dehydrogenase complex, mitochondrial OS=Arabidopsis thaliana OX=3702 GN=BCE2 PE=1 SV=1	lipoamide acyltransferase component of branched-chain alpha-keto acid dehydrogenase complex, mitochondrial [Aegilops tauschii subsp. tauschii]
TraesCS2B02G193000	[M]	Cell wall/membrane/envelope biogenesis	Molecular Function: protein kinase activity (GO:0004672);; Molecular Function: ATP binding (GO:0005524);; Biological Process: protein phosphorylation (GO:0006468);; Cellular Component: integral component of membrane (GO:0016021);;	--	--	Protein STRUBBELIG-RECEPTOR FAMILY 7 OS=Arabidopsis thaliana OX=3702 GN=SRF7 PE=1 SV=1	protein STRUBBELIG-RECEPTOR FAMILY 7-like [Aegilops tauschii subsp. tauschii]
Triticum_aestivum_newGene_8259	--	--	--	--	--	--	verprolin-like [Aegilops tauschii subsp. tauschii]
TraesCS7D02G512900	[K]	Transcription	Molecular Function: protein kinase activity (GO:0004672);; Molecular Function: ATP binding (GO:0005524);; Biological Process: protein phosphorylation (GO:0006468);; Cellular Component: integral component of membrane (GO:0016021);;	--	--	Receptor protein kinase-like protein At4g34220 OS=Arabidopsis thaliana OX=3702 GN=At4g34220 PE=2 SV=1	probable LRR receptor-like serine/threonine-protein kinase At4g37250 [Aegilops tauschii subsp. tauschii]
Triticum_aestivum_newGene_93077	--	--	--	--	--	--	uncharacterized protein LOC109740727 [Aegilops tauschii subsp. tauschii]
TraesCS1D02G237500	--	--	Biological Process: carbohydrate metabolic process (GO:0005975);; Molecular Function: polysaccharide binding (GO:0030247);; Molecular Function: licheninase activity (GO:0042972);; Cellular Component: anchored component of plasma membrane (GO:0046658);;	--	--	Lichenase-2 (Fragment) OS=Hordeum vulgare OX=4513 PE=1 SV=1	lichenase-2 [Aegilops tauschii subsp. tauschii]
TraesCS5A02G473200	--	--	Cellular Component: mitochondrion (GO:0005739);; Cellular Component: Golgi apparatus (GO:0005794);; Cellular Component: integral component of membrane (GO:0016021);; Molecular Function: O-acetyltransferase activity (GO:0016413);; Biological Process: cell wall organization or biogenesis (GO:0071554);;	--	--	Protein trichome birefringence-like 33 OS=Arabidopsis thaliana OX=3702 GN=TBL33 PE=2 SV=1	protein trichome birefringence-like 33 [Aegilops tauschii subsp. tauschii]
TraesCS5D02G153600	[GEPR]	Carbohydrate transport and metabolism;; Amino acid transport and metabolism;; Inorganic ion transport and metabolism;; General function prediction only	Molecular Function: transporter activity (GO:0005215);; Cellular Component: integral component of membrane (GO:0016021);; Biological Process: transmembrane transport (GO:0055085);;	--	--	Protein ZINC INDUCED FACILITATOR-LIKE 1 OS=Arabidopsis thaliana OX=3702 GN=ZIFL1 PE=2 SV=1	Protein ZINC INDUCED FACILITATOR-LIKE 1 [Triticum urartu]
TraesCS4B02G348300	--	--	Cellular Component: extracellular region (GO:0005576);; Biological Process: pathogenesis (GO:0009405);;	--	--	--	pore-forming toxin-like protein Hfr-2 [Triticum aestivum]
TraesCS5A02G163400	[M]	Cell wall/membrane/envelope biogenesis	Molecular Function: cinnamoyl-CoA reductase activity (GO:0016621);; Molecular Function: coenzyme binding (GO:0050662);; Biological Process: oxidation-reduction process (GO:0055114);;	K09753|0|sbi:SORBI_02g014910|K09753 cinnamoyl-CoA reductase [EC:1.2.1.44] | (RefSeq) SORBIDRAFT_02g014910, Sb02g014910; hypothetical protein	Phenylpropanoid biosynthesis (ko00940)	Cinnamoyl-CoA reductase 1 OS=Arabidopsis thaliana OX=3702 GN=CCR1 PE=1 SV=1	cinnamoyl-CoA reductase [Triticum aestivum]
Triticum_aestivum_newGene_69100	--	--	Molecular Function: nucleotide binding (GO:0000166);; Molecular Function: nuclease activity (GO:0004518);; Molecular Function: aminoacyl-tRNA ligase activity (GO:0004812);; Biological Process: tRNA aminoacylation for protein translation (GO:0006418);; Cellular Component: membrane (GO:0016020);; Biological Process: RNA phosphodiester bond hydrolysis (GO:0090501);;	--	--	--	Threonyl-tRNA synthetase, mitochondrial [Triticum urartu]
TraesCS2D02G200500	[O]	Posttranslational modification, protein turnover, chaperones	Molecular Function: cysteine-type endopeptidase activity (GO:0004197);; Cellular Component: extracellular space (GO:0005615);; Cellular Component: lysosome (GO:0005764);; Biological Process: proteolysis involved in cellular protein catabolic process (GO:0051603);;	K01373|0|bdi:100834449|K01373 cathepsin F [EC:3.4.22.41] | (RefSeq) cysteine proteinase 1	--	Probable cysteine protease RD19D OS=Arabidopsis thaliana OX=3702 GN=RD19D PE=2 SV=1	probable cysteine protease RD19D [Aegilops tauschii subsp. tauschii]
TraesCS7B02G235400	--	--	Cellular Component: plasma membrane (GO:0005886);; Molecular Function: zinc ion binding (GO:0008270);; Cellular Component: integral component of membrane (GO:0016021);; Biological Process: protein ubiquitination (GO:0016567);; Biological Process: proteasome-mediated ubiquitin-dependent protein catabolic process (GO:0043161);; Biological Process: negative regulation of short-day photoperiodism, fl…	--	--	E3 ubiquitin-protein ligase Os06g0535400 OS=Oryza sativa subsp. japonica OX=39947 GN=Os06g0535400 PE=2 SV=1	predicted protein [Hordeum vulgare subsp. vulgare]
Triticum_aestivum_newGene_68428	--	--	--	K11968|3.64205e-17|sita:101756595|K11968 ariadne-1 [EC:2.3.2.27] | (RefSeq) probable E3 ubiquitin-protein ligase ARI7	--	Probable E3 ubiquitin-protein ligase ARI7 OS=Arabidopsis thaliana OX=3702 GN=ARI7 PE=2 SV=1	uncharacterized protein LOC109747839 [Aegilops tauschii subsp. tauschii]
TraesCS2B02G389300	--	--	Biological Process: GPI anchor biosynthetic process (GO:0006506);; Cellular Component: integral component of membrane (GO:0016021);; Molecular Function: transferase activity, transferring acyl groups (GO:0016746);;	K05283|0|bdi:100833614|K05283 phosphatidylinositol glycan, class W [EC:2.3.-.-] | (RefSeq) uncharacterized protein At4g17910	Glycosylphosphatidylinositol(GPI)-anchor biosynthesis (ko00563)	Uncharacterized protein At4g17910 OS=Arabidopsis thaliana OX=3702 GN=At4g17910 PE=2 SV=2	uncharacterized protein At4g17910-like [Aegilops tauschii subsp. tauschii]
TraesCS2D02G443200	[K]	Transcription	Molecular Function: protein kinase activity (GO:0004672);; Molecular Function: ATP binding (GO:0005524);; Biological Process: protein phosphorylation (GO:0006468);; Cellular Component: integral component of membrane (GO:0016021);;	--	--	Receptor protein kinase-like protein ZAR1 OS=Arabidopsis thaliana OX=3702 GN=ZAR1 PE=1 SV=1	receptor protein kinase-like protein ZAR1 [Aegilops tauschii subsp. tauschii]
Triticum_aestivum_newGene_101235	--	--	--	--	--	--	PREDICTED: uncharacterized protein LOC100822160 [Brachypodium distachyon]
TraesCS5A02G143200	--	--	Molecular Function: DNA binding (GO:0003677);; Cellular Component: nucleus (GO:0005634);; Biological Process: regulation of transcription, DNA-templated (GO:0006355);;	--	--	NAC domain-containing protein 10 OS=Oryza sativa subsp. japonica OX=39947 GN=NAC010 PE=2 SV=1	NAC domain transcription factor [Triticum aestivum]
Triticum_aestivum_newGene_40149	--	--	--	--	--	--	hypothetical protein TRIUR3_10413 [Triticum urartu]
TraesCS2B02G459100	[H]	Coenzyme transport and metabolism	Cellular Component: mitochondrion (GO:0005739);; Molecular Function: alternative oxidase activity (GO:0009916);; Cellular Component: integral component of membrane (GO:0016021);; Molecular Function: metal ion binding (GO:0046872);; Biological Process: oxidation-reduction process (GO:0055114);; Cellular Component: respiratory chain (GO:0070469);;	K17893|0|bdi:100833030|K17893 ubiquinol oxidase [EC:1.10.3.11] | (RefSeq) ubiquinol oxidase 2, mitochondrial-like	--	Ubiquinol oxidase 1b, mitochondrial OS=Oryza sativa subsp. japonica OX=39947 GN=AOX1B PE=2 SV=1	ubiquinol oxidase 2, mitochondrial-like [Aegilops tauschii subsp. tauschii]
Triticum_aestivum_newGene_22625	--	--	Molecular Function: protein serine/threonine kinase activity (GO:0004674);; Molecular Function: protein tyrosine kinase activity (GO:0004713);; Molecular Function: ATP binding (GO:0005524);; Cellular Component: plasma membrane (GO:0005886);; Biological Process: defense response (GO:0006952);; Cellular Component: plasmodesma (GO:0009506);; Cellular Component: integral component of membrane (GO:001…	--	--	Cysteine-rich repeat secretory protein 38 OS=Arabidopsis thaliana OX=3702 GN=CRRSP38 PE=2 SV=1	Cysteine-rich receptor-like protein kinase 25 [Triticum urartu]
Triticum_aestivum_newGene_68501	--	--	Biological Process: cellular metabolic process (GO:0044237);;	--	--	--	Diacylglycerol kinase [Triticum urartu]
TraesCS3D02G527200	--	--	Molecular Function: nucleotide binding (GO:0000166);; Molecular Function: protein serine/threonine kinase activity (GO:0004674);; Cellular Component: plasma membrane (GO:0005886);; Biological Process: cell surface receptor signaling pathway (GO:0007166);; Biological Process: phosphorylation (GO:0016310);; Molecular Function: ion binding (GO:0043167);;	--	--	Wall-associated receptor kinase-like 5 OS=Arabidopsis thaliana OX=3702 GN=WAKL5 PE=2 SV=2	Wall-associated receptor kinase 5 [Triticum urartu]
TraesCS3D02G304900	[Q]	Secondary metabolites biosynthesis, transport and catabolism	Molecular Function: diacylglycerol O-acyltransferase activity (GO:0004144);; Cellular Component: plasma membrane (GO:0005886);; Cellular Component: integral component of membrane (GO:0016021);; Biological Process: triglyceride biosynthetic process (GO:0019432);; Molecular Function: long-chain-alcohol O-fatty-acyltransferase activity (GO:0047196);;	--	--	O-acyltransferase WSD1 OS=Arabidopsis thaliana OX=3702 GN=WSD1 PE=2 SV=1	O-acyltransferase WSD1-like [Aegilops tauschii subsp. tauschii]
TraesCS2B02G419300	[L]	Replication, recombination and repair	Molecular Function: DNA clamp loader activity (GO:0003689);; Molecular Function: ATP binding (GO:0005524);; Cellular Component: nucleus (GO:0005634);; Cellular Component: DNA replication factor C complex (GO:0005663);; Biological Process: DNA-dependent DNA replication (GO:0006261);;	K10755|0|bdi:100829254|K10755 replication factor C subunit 2/4 | (RefSeq) replication factor C subunit 4	DNA replication (ko03030);; Nucleotide excision repair (ko03420);; Mismatch repair (ko03430)	Replication factor C subunit 4 OS=Oryza sativa subsp. japonica OX=39947 GN=RFC4 PE=2 SV=2	predicted protein [Hordeum vulgare subsp. vulgare]
TraesCS7D02G490800	[H]	Coenzyme transport and metabolism	Molecular Function: S-adenosylmethionine-dependent methyltransferase activity (GO:0008757);; Cellular Component: plastid (GO:0009536);; Biological Process: methylation (GO:0032259);;	--	--	Uncharacterized methyltransferase At2g41040, chloroplastic OS=Arabidopsis thaliana OX=3702 GN=At2g41040 PE=1 SV=1	uncharacterized methyltransferase At2g41040, chloroplastic-like isoform X1 [Aegilops tauschii subsp. tauschii]
TraesCS2D02G501100	--	--	--	--	--	--	uncharacterized protein LOC109731712 [Aegilops tauschii subsp. tauschii]
TraesCS7A02G159200	[Q]	Secondary metabolites biosynthesis, transport and catabolism	Biological Process: response to iron(III) ion (GO:0010041);; Molecular Function: 2'-deoxymugineic-acid 2'-dioxygenase activity (GO:0033760);; Molecular Function: metal ion binding (GO:0046872);; Biological Process: oxidation-reduction process (GO:0055114);;	K18054|0|bdi:100823703|K18054 2'-deoxymugineic-acid 2'-dioxygenase / mugineic-acid 3-dioxygenase [EC:1.14.11.24 1.14.11.25] | (RefSeq) 2'-deoxymugineic-acid 2'-dioxygenase-like	--	2&apos;-deoxymugineic-acid 2&apos;-dioxygenase OS=Hordeum vulgare OX=4513 GN=IDS3 PE=1 SV=3	2&apos;-deoxymugineic-acid 2&apos;-dioxygenase-like [Aegilops tauschii subsp. tauschii]
TraesCS5D02G446900	[S]	Function unknown	Cellular Component: extracellular region (GO:0005576);;	K13449|4.25708e-64|dosa:Os07t0129200-01|K13449 pathogenesis-related protein 1 | (RAP-DB) Os07g0129200, PATHOGENESIS-RELATED_GENE_1A, PR1A; Similar to Pathogenesis-related protein PR1a.	Plant hormone signal transduction (ko04075);; Plant-pathogen interaction (ko04626)	Pathogenesis-related protein 1 OS=Hordeum vulgare OX=4513 PE=2 SV=1	pathogenesis-related protein 1-16 [Triticum aestivum]
TraesCS2B02G411800	--	--	--	--	--	--	uncharacterized protein LOC109748010 [Aegilops tauschii subsp. tauschii]
Triticum_aestivum_newGene_31087	--	--	--	--	--	--	wiskott-Aldrich syndrome protein homolog 1-like isoform X2 [Aegilops tauschii subsp. tauschii]
TraesCS2B02G365500	--	--	--	--	--	--	uncharacterized protein LOC109747526 [Aegilops tauschii subsp. tauschii]
TraesCS6D02G026500	[G]	Carbohydrate transport and metabolism	Molecular Function: sucrose alpha-glucosidase activity (GO:0004575);; Biological Process: carbohydrate metabolic process (GO:0005975);; Cellular Component: integral component of membrane (GO:0016021);; Molecular Function: transferase activity (GO:0016740);;	K01193|0|bdi:100839920|K01193 beta-fructofuranosidase [EC:3.2.1.26] | (RefSeq) sucrose:sucrose 1-fructosyltransferase-like	Galactose metabolism (ko00052);; Starch and sucrose metabolism (ko00500)	Sucrose:sucrose 1-fructosyltransferase OS=Festuca arundinacea OX=4606 GN=1-SST PE=1 SV=1	sucrose:sucrose 1-fructosyltransferase-like [Aegilops tauschii subsp. tauschii]
TraesCS6D02G376800	--	--	--	--	--	--	hypothetical protein TRIUR3_05027 [Triticum urartu]
Triticum_aestivum_newGene_13112	--	--	--	--	--	--	hypothetical protein TRIUR3_09513 [Triticum urartu]
TraesCS1D02G363800	[M]	Cell wall/membrane/envelope biogenesis	Molecular Function: protein serine/threonine kinase activity (GO:0004674);; Molecular Function: ATP binding (GO:0005524);; Biological Process: protein phosphorylation (GO:0006468);;	K08818|8.55733e-144|bdi:100835043|K08818 cell division cycle 2-like [EC:2.7.11.22] | (RefSeq) putative cyclin-dependent kinase F-2	--	Putative cyclin-dependent kinase F-2 OS=Oryza sativa subsp. japonica OX=39947 GN=CDKF-2 PE=3 SV=1	putative cyclin-dependent kinase F-2 [Aegilops tauschii subsp. tauschii]
TraesCS3D02G380200	[S]	Function unknown	Biological Process: double-strand break repair via homologous recombination (GO:0000724);; Molecular Function: double-stranded DNA binding (GO:0003690);; Molecular Function: single-stranded DNA binding (GO:0003697);; Cellular Component: nucleus (GO:0005634);; Cellular Component: mitochondrion (GO:0005739);; Molecular Function: cobalt ion binding (GO:0050897);;	--	--	DNA repair RAD52-like protein 1, mitochondrial OS=Arabidopsis thaliana OX=3702 GN=RAD52-1 PE=1 SV=1	DNA repair RAD52-like protein 1, mitochondrial [Aegilops tauschii subsp. tauschii]
TraesCS2B02G408300	--	--	--	--	--	--	hypothetical protein TRIUR3_18502 [Triticum urartu]
TraesCS7A02G169100	--	--	Biological Process: amino acid transmembrane transport (GO:0003333);; Cellular Component: plasma membrane (GO:0005886);; Molecular Function: amino acid transmembrane transporter activity (GO:0015171);; Cellular Component: integral component of membrane (GO:0016021);; Biological Process: amino acid export (GO:0032973);; Biological Process: amino acid import (GO:0043090);; Biological Process: amino…	--	--	WAT1-related protein At1g44800 OS=Arabidopsis thaliana OX=3702 GN=At1g44800 PE=1 SV=1	WAT1-related protein At1g44800-like [Aegilops tauschii subsp. tauschii]
TraesCS3B02G290300	[V]	Defense mechanisms	Molecular Function: ATP binding (GO:0005524);; Cellular Component: integral component of membrane (GO:0016021);; Molecular Function: ATPase activity, coupled to transmembrane movement of substances (GO:0042626);; Biological Process: transmembrane transport (GO:0055085);;	K05658|0|bdi:100842644|K05658 ATP-binding cassette, subfamily B (MDR/TAP), member 1 [EC:3.6.3.44] | (RefSeq) ABC transporter B family member 4-like	ABC transporters (ko02010)	ABC transporter B family member 4 OS=Arabidopsis thaliana OX=3702 GN=ABCB4 PE=1 SV=1	ABC transporter B family member 4-like [Aegilops tauschii subsp. tauschii]
TraesCS7D02G416800	--	--	--	--	--	--	uncharacterized protein LOC109778894 [Aegilops tauschii subsp. tauschii]
Triticum_aestivum_newGene_53891	--	--	Cellular Component: exocyst (GO:0000145);; Cellular Component: cytosol (GO:0005829);; Cellular Component: plasma membrane (GO:0005886);; Biological Process: vesicle docking involved in exocytosis (GO:0006904);; Molecular Function: lipid binding (GO:0008289);; Cellular Component: plasmodesma (GO:0009506);; Biological Process: protein transport (GO:0015031);; Biological Process: mucilage biosynthet…	K06111|6.13871e-79|sita:101779778|K06111 exocyst complex component 4 | (RefSeq) exocyst complex component SEC8	--	Exocyst complex component SEC8 OS=Arabidopsis thaliana OX=3702 GN=SEC8 PE=1 SV=1	exocyst complex component SEC8 [Aegilops tauschii subsp. tauschii]
TraesCS2B02G436300	--	--	Molecular Function: DNA binding (GO:0003677);; Molecular Function: transcription factor activity, sequence-specific DNA binding (GO:0003700);; Cellular Component: nucleus (GO:0005634);; Biological Process: regulation of transcription, DNA-templated (GO:0006355);;	K09286|8.72322e-80|bdi:100832404|K09286 EREBP-like factor | (RefSeq) ethylene-responsive transcription factor 2	--	Ethylene-responsive transcription factor 2 OS=Nicotiana sylvestris OX=4096 GN=ERF2 PE=2 SV=1	ethylene-responsive transcription factor 2-like [Aegilops tauschii subsp. tauschii]
TraesCS3A02G241000	[G]	Carbohydrate transport and metabolism	Cellular Component: extracellular region (GO:0005576);; Molecular Function: mannan endo-1,4-beta-mannosidase activity (GO:0016985);; Biological Process: mannan catabolic process (GO:0046355);;	K19355|0|bdi:100846205|K19355 mannan endo-1,4-beta-mannosidase [EC:3.2.1.78] | (RefSeq) mannan endo-1,4-beta-mannosidase 1	Fructose and mannose metabolism (ko00051)	Mannan endo-1,4-beta-mannosidase 1 OS=Oryza sativa subsp. japonica OX=39947 GN=MAN1 PE=2 SV=2	mannan endo-1,4-beta-mannosidase 1 [Aegilops tauschii subsp. tauschii]
Triticum_aestivum_newGene_68980	--	--	Molecular Function: metal ion binding (GO:0046872);;	--	--	--	unnamed protein product [Triticum aestivum]
Triticum_aestivum_newGene_70267	--	--	--	--	--	--	uncharacterized protein LOC109761929 [Aegilops tauschii subsp. tauschii]
TraesCS2B02G435600	[R]	General function prediction only	Molecular Function: ATP binding (GO:0005524);; Cellular Component: plastid (GO:0009536);; Molecular Function: ADP binding (GO:0043531);;	K13457|0|bdi:100845263|K13457 disease resistance protein RPM1 | (RefSeq) disease resistance protein RPM1-like	Plant-pathogen interaction (ko04626)	Disease resistance protein RPM1 OS=Arabidopsis thaliana OX=3702 GN=RPM1 PE=1 SV=1	disease resistance protein RPM1-like [Aegilops tauschii subsp. tauschii]
TraesCS3A02G098700	--	--	Cellular Component: integral component of membrane (GO:0016021);;	--	--	--	uncharacterized protein LOC109769934 [Aegilops tauschii subsp. tauschii]
TraesCS7B02G462100	[Q]	Secondary metabolites biosynthesis, transport and catabolism	Biological Process: flavonoid biosynthetic process (GO:0009813);; Molecular Function: naringenin-chalcone synthase activity (GO:0016210);;	K00660|1.76416e-38|bdi:100829639|K00660 chalcone synthase [EC:2.3.1.74] | (RefSeq) chalcone synthase 2	Flavonoid biosynthesis (ko00941);; Circadian rhythm - plant (ko04712)	Chalcone synthase 1 OS=Hordeum vulgare OX=4513 GN=CHS1 PE=3 SV=1	chalcone synthase [Triticum aestivum]
TraesCS6B02G141300	--	--	Molecular Function: DNA binding (GO:0003677);; Cellular Component: nucleus (GO:0005634);; Biological Process: regulation of transcription, DNA-templated (GO:0006355);; Biological Process: auxin-activated signaling pathway (GO:0009734);;	--	--	Auxin response factor 5 OS=Oryza sativa subsp. japonica OX=39947 GN=ARF5 PE=2 SV=2	auxin response factor 5-like isoform X1 [Aegilops tauschii subsp. tauschii]
Triticum_aestivum_newGene_90840	--	--	--	--	--	--	uncharacterized protein LOC109757367 [Aegilops tauschii subsp. tauschii]
Triticum_aestivum_newGene_3265	--	--	--	--	--	--	uncharacterized protein LOC109781249 [Aegilops tauschii subsp. tauschii]
TraesCS3D02G432400	--	--	--	--	--	--	uncharacterized protein LOC109733677 isoform X2 [Aegilops tauschii subsp. tauschii]
TraesCS1A02G018600	[T]	Signal transduction mechanisms	Molecular Function: protein serine/threonine kinase activity (GO:0004674);; Molecular Function: ATP binding (GO:0005524);; Cellular Component: plasma membrane (GO:0005886);; Biological Process: protein phosphorylation (GO:0006468);; Cellular Component: integral component of membrane (GO:0016021);;	--	--	Rust resistance kinase Lr10 OS=Triticum aestivum OX=4565 GN=LRK10 PE=2 SV=1	RecName: Full=Rust resistance kinase Lr10; AltName: Full=Probable receptor-like serine/threonine-protein kinase LRK10; Flags: Precursor
TraesCS2B02G475800	--	--	--	--	--	--	protein MARD1-like [Aegilops tauschii subsp. tauschii]
TraesCS4B02G283600	[G]	Carbohydrate transport and metabolism	Biological Process: carbohydrate transport (GO:0008643);; Cellular Component: integral component of membrane (GO:0016021);;	--	--	--	predicted protein [Hordeum vulgare subsp. vulgare]
TraesCS5B02G021800	[O]	Posttranslational modification, protein turnover, chaperones	Molecular Function: glutathione transferase activity (GO:0004364);; Cellular Component: cytoplasm (GO:0005737);; Biological Process: glutathione metabolic process (GO:0006749);;	K00799|6.83161e-125|osa:4325704|K00799 glutathione S-transferase [EC:2.5.1.18] | (RefSeq) P0493G01.3; glutathione S-transferase 4	Glutathione metabolism (ko00480)	Glutathione S-transferase 4 OS=Zea mays OX=4577 GN=GST4 PE=1 SV=2	glutathione transferase F4 [Triticum aestivum]
Triticum_aestivum_newGene_71960	--	--	--	--	--	--	hypothetical protein TRIUR3_31077 [Triticum urartu]
Triticum_aestivum_newGene_42812	[X]	Mobilome: prophages, transposons	Molecular Function: DNA binding (GO:0003677);; Cellular Component: mitochondrion (GO:0005739);; Biological Process: DNA recombination (GO:0006310);; Cellular Component: plastid (GO:0009536);;	--	--	Retrovirus-related Pol polyprotein from transposon TNT 1-94 OS=Nicotiana tabacum OX=4097 PE=2 SV=1	reverse transcriptase [Zea mays]
TraesCS4A02G107400	--	--	Cellular Component: Golgi apparatus (GO:0005794);; Biological Process: plant-type secondary cell wall biogenesis (GO:0009834);; Biological Process: glucuronoxylan biosynthetic process (GO:0010417);; Molecular Function: galactosylgalactosylxylosylprotein 3-beta-glucuronosyltransferase activity (GO:0015018);; Cellular Component: membrane (GO:0016020);; Molecular Function: xylosyltransferase activit…	K20869|9.03635e-121|bdi:100835571|K20869 putative beta-1,4-xylosyltransferase IRX9 [EC:2.4.2.-] | (RefSeq) probable glucuronosyltransferase Os03g0287800	--	Probable glucuronosyltransferase Os03g0287800 OS=Oryza sativa subsp. japonica OX=39947 GN=Os03g0287800 PE=3 SV=1	GT43_2A [Triticum aestivum]
TraesCS6B02G270200	--	--	Molecular Function: protein serine/threonine kinase activity (GO:0004674);; Cellular Component: mitochondrion (GO:0005739);; Cellular Component: cytosol (GO:0005829);; Biological Process: regulation of transcription, DNA-templated (GO:0006355);; Biological Process: protein phosphorylation (GO:0006468);; Biological Process: intracellular signal transduction (GO:0035556);; Molecular Function: prote…	--	--	Transcription factor LHW OS=Arabidopsis thaliana OX=3702 GN=LHW PE=1 SV=1	uncharacterized protein LOC109750306 isoform X1 [Aegilops tauschii subsp. tauschii]
Triticum_aestivum_newGene_71501	--	--	--	--	--	--	unnamed protein product [Triticum aestivum]
TraesCS3A02G471100	--	--	Molecular Function: methyltransferase activity (GO:0008168);; Biological Process: methylation (GO:0032259);;	K08241|4.17003e-166|bdi:100821386|K08241 jasmonate O-methyltransferase [EC:2.1.1.141] | (RefSeq) jasmonate O-methyltransferase-like	alpha-Linolenic acid metabolism (ko00592)	Inactive anthranilate O-methyltransferase 1 OS=Zea mays OX=4577 GN=AAMT1I PE=2 SV=1	Salicylate O-methyltransferase [Triticum urartu]
TraesCS4A02G304400	[Q]	Secondary metabolites biosynthesis, transport and catabolism	Biological Process: suberin biosynthetic process (GO:0010345);; Cellular Component: integral component of membrane (GO:0016021);; Biological Process: long-chain fatty-acyl-CoA metabolic process (GO:0035336);; Cellular Component: intracellular membrane-bounded organelle (GO:0043231);; Biological Process: oxidation-reduction process (GO:0055114);; Molecular Function: fatty-acyl-CoA reductase (alcoh…	K13356|0|bdi:100827426|K13356 alcohol-forming fatty acyl-CoA reductase [EC:1.2.1.84] | (RefSeq) probable fatty acyl-CoA reductase 4	Cutin, suberine and wax biosynthesis (ko00073);; Peroxisome (ko04146)	Probable fatty acyl-CoA reductase 5 OS=Arabidopsis thaliana OX=3702 GN=FAR5 PE=1 SV=1	alcohol-forming fatty acyl-coenzyme A reductase [Triticum aestivum]
Triticum_aestivum_newGene_88814	--	--	--	K08873|3.34694e-07|bdi:104581974|K08873 serine/threonine-protein kinase SMG1 [EC:2.7.11.1] | (RefSeq) serine/threonine-protein kinase SMG1-like	mRNA surveillance pathway (ko03015)	--	cyclin dependent protein kinase [Triticum aestivum]
Triticum_aestivum_newGene_75817	--	--	--	--	--	--	uncharacterized protein LOC109756084 [Aegilops tauschii subsp. tauschii]
TraesCS1A02G364800	[G]	Carbohydrate transport and metabolism	Molecular Function: polygalacturonase activity (GO:0004650);; Cellular Component: extracellular region (GO:0005576);; Biological Process: carbohydrate metabolic process (GO:0005975);; Biological Process: cell wall organization (GO:0071555);;	--	--	Probable polygalacturonase At1g80170 OS=Arabidopsis thaliana OX=3702 GN=At1g80170 PE=1 SV=1	probable polygalacturonase At1g80170 [Aegilops tauschii subsp. tauschii]
TraesCS2B02G468400	--	--	Cellular Component: synaptonemal complex (GO:0000795);; Biological Process: reciprocal meiotic recombination (GO:0007131);; Cellular Component: plastid (GO:0009536);;	--	--	Putative WEB family protein At1g65010, chloroplastic OS=Arabidopsis thaliana OX=3702 GN=At1g65010 PE=1 SV=1	WEB family protein At5g16730, chloroplastic-like [Aegilops tauschii subsp. tauschii]
Triticum_aestivum_newGene_45097	--	--	Biological Process: ribosomal large subunit assembly (GO:0000027);; Molecular Function: structural constituent of ribosome (GO:0003735);; Biological Process: translation (GO:0006412);; Molecular Function: 5S rRNA binding (GO:0008097);; Cellular Component: cytosolic large ribosomal subunit (GO:0022625);;	K02932|3.0388e-42|bdi:100833119|K02932 large subunit ribosomal protein L5e | (RefSeq) 60S ribosomal protein L5-1	Ribosome (ko03010)	60S ribosomal protein L5-1 OS=Oryza sativa subsp. indica OX=39946 GN=RPL5A PE=3 SV=2	PREDICTED: 60S ribosomal protein L5-1 [Brachypodium distachyon]
TraesCS6B02G189300	[O]	Posttranslational modification, protein turnover, chaperones	Biological Process: protein peptidyl-prolyl isomerization (GO:0000413);; Molecular Function: peptidyl-prolyl cis-trans isomerase activity (GO:0003755);; Molecular Function: FK506 binding (GO:0005528);; Cellular Component: endoplasmic reticulum membrane (GO:0005789);; Cellular Component: plastid (GO:0009536);; Biological Process: chaperone-mediated protein folding (GO:0061077);;	--	--	Peptidyl-prolyl cis-trans isomerase FKBP16-1, chloroplastic OS=Arabidopsis thaliana OX=3702 GN=FKBP16-1 PE=2 SV=1	peptidyl-prolyl cis-trans isomerase FKBP16-1, chloroplastic isoform X1 [Aegilops tauschii subsp. tauschii]
TraesCS3A02G181400	[C]	Energy production and conversion	Cellular Component: plastid (GO:0009536);; Biological Process: photosynthesis (GO:0015979);; Biological Process: chlorophyll biosynthetic process (GO:0015995);; Molecular Function: oxidoreductase activity, acting on the CH-CH group of donors, NAD or NADP as acceptor (GO:0016628);; Molecular Function: geranylgeranyl reductase activity (GO:0045550);; Biological Process: oxidation-reduction process …	K10960|0|bdi:100821798|K10960 geranylgeranyl diphosphate/geranylgeranyl-bacteriochlorophyllide a reductase [EC:1.3.1.83 1.3.1.111] | (RefSeq) geranylgeranyl diphosphate reductase, chloroplastic-like	Porphyrin and chlorophyll metabolism (ko00860);; Terpenoid backbone biosynthesis (ko00900)	Geranylgeranyl diphosphate reductase, chloroplastic OS=Nicotiana tabacum OX=4097 GN=CHLP PE=2 SV=1	geranylgeranyl diphosphate reductase, chloroplastic-like [Aegilops tauschii subsp. tauschii]
TraesCS2B02G408600	--	--	Biological Process: proteolysis (GO:0006508);; Molecular Function: peptidase activity (GO:0008233);; Cellular Component: plastid (GO:0009536);; Molecular Function: hydrolase activity, acting on ester bonds (GO:0016788);;	K14648|0|bdi:100826931|K14648 poly(U)-specific endoribonuclease [EC:3.1.-.-] | (RefSeq) poly(U)-specific endoribonuclease-B	--	--	predicted protein, partial [Hordeum vulgare subsp. vulgare]
TraesCS2D02G107500	--	--	Molecular Function: peroxidase activity (GO:0004601);; Cellular Component: extracellular region (GO:0005576);; Biological Process: response to oxidative stress (GO:0006979);; Molecular Function: heme binding (GO:0020037);; Biological Process: hydrogen peroxide catabolic process (GO:0042744);; Molecular Function: metal ion binding (GO:0046872);; Biological Process: oxidation-reduction process (GO:…	K00430|4.98237e-158|dosa:Os07t0676900-01|K00430 peroxidase [EC:1.11.1.7] | (RAP-DB) Os07g0676900; Similar to Peroxidase (EC 1.11.1.7).	Phenylpropanoid biosynthesis (ko00940)	Peroxidase 2 OS=Oryza sativa subsp. japonica OX=39947 GN=PRX112 PE=2 SV=1	peroxidase 2-like [Aegilops tauschii subsp. tauschii]
TraesCS5A02G281700	--	--	Molecular Function: serine-type endopeptidase inhibitor activity (GO:0004867);; Biological Process: response to wounding (GO:0009611);; Biological Process: negative regulation of endopeptidase activity (GO:0010951);;	--	--	Subtilisin-chymotrypsin inhibitor-2A OS=Hordeum vulgare OX=4513 PE=1 SV=2	Subtilisin-chymotrypsin inhibitor-2A [Triticum urartu]
TraesCS3D02G039400	--	--	Molecular Function: aspartic-type endopeptidase activity (GO:0004190);; Biological Process: proteolysis (GO:0006508);; Biological Process: xylan catabolic process (GO:0045493);;	--	--	--	uncharacterized protein LOC109772661 [Aegilops tauschii subsp. tauschii]
TraesCS2B02G435700	--	--	--	--	--	DeSI-like protein At4g17486 OS=Arabidopsis thaliana OX=3702 GN=At4g17486 PE=2 SV=1	deSI-like protein At4g17486 [Aegilops tauschii subsp. tauschii]
Triticum_aestivum_newGene_24251	--	--	Cellular Component: integral component of membrane (GO:0016021);;	--	--	--	uncharacterized protein LOC109759491 [Aegilops tauschii subsp. tauschii]
Triticum_aestivum_newGene_75755	--	--	--	--	--	--	uncharacterized protein LOC109771236 [Aegilops tauschii subsp. tauschii]
TraesCS2D02G449900	[T]	Signal transduction mechanisms	Molecular Function: ubiquitin-protein transferase activity (GO:0004842);; Biological Process: protein ubiquitination (GO:0016567);;	--	--	E3 ubiquitin-protein ligase PUB23 OS=Arabidopsis thaliana OX=3702 GN=PUB23 PE=1 SV=1	E3 ubiquitin-protein ligase PUB23-like [Aegilops tauschii subsp. tauschii]
TraesCS3D02G342100	[O]	Posttranslational modification, protein turnover, chaperones	Molecular Function: cysteine-type endopeptidase activity (GO:0004197);; Cellular Component: extracellular space (GO:0005615);; Cellular Component: lysosome (GO:0005764);; Cellular Component: integral component of membrane (GO:0016021);; Biological Process: proteolysis involved in cellular protein catabolic process (GO:0051603);;	K16292|3.88956e-180|sita:101769259|K16292 KDEL-tailed cysteine endopeptidase [EC:3.4.22.-] | (RefSeq) vignain-like	--	KDEL-tailed cysteine endopeptidase CEP1 OS=Arabidopsis thaliana OX=3702 GN=CEP1 PE=1 SV=1	thiol protease SEN102-like [Aegilops tauschii subsp. tauschii]
TraesCSU02G146600	--	--	Cellular Component: extracellular region (GO:0005576);; Cellular Component: transcription factor TFIIA complex (GO:0005672);; Biological Process: transcription initiation from RNA polymerase II promoter (GO:0006367);;	--	--	Thaumatin-like protein OS=Oryza sativa subsp. japonica OX=39947 GN=Os12g0628600 PE=1 SV=1	thaumatin-like protein [Aegilops tauschii subsp. tauschii]
TraesCS2B02G467400	--	--	Cellular Component: ubiquitin ligase complex (GO:0000151);; Biological Process: protein polyubiquitination (GO:0000209);; Cellular Component: cytoplasm (GO:0005737);; Molecular Function: zinc ion binding (GO:0008270);; Molecular Function: ligase activity (GO:0016874);; Molecular Function: ubiquitin conjugating enzyme binding (GO:0031624);; Biological Process: positive regulation of proteasomal ub…	K11971|0|bdi:100832737|K11971 E3 ubiquitin-protein ligase RNF14 [EC:2.3.2.27] | (RefSeq) E3 ubiquitin-protein ligase RNF14	--	Probable E3 ubiquitin-protein ligase ARI7 OS=Arabidopsis thaliana OX=3702 GN=ARI7 PE=2 SV=1	PREDICTED: E3 ubiquitin-protein ligase RNF14 [Brachypodium distachyon]
TraesCS5B02G261500	[G]	Carbohydrate transport and metabolism	Molecular Function: transporter activity (GO:0005215);; Biological Process: sodium ion transport (GO:0006814);; Cellular Component: integral component of membrane (GO:0016021);; Biological Process: anion transmembrane transport (GO:0098656);;	K14445|0|bdi:100822173|K14445 solute carrier family 13 (sodium-dependent dicarboxylate transporter), member 2/3/5 | (RefSeq) tonoplast dicarboxylate transporter-like	--	Tonoplast dicarboxylate transporter OS=Arabidopsis thaliana OX=3702 GN=TDT PE=2 SV=2	tonoplast dicarboxylate transporter-like [Aegilops tauschii subsp. tauschii]
Triticum_aestivum_newGene_27959	--	--	--	--	--	--	unnamed protein product [Triticum aestivum]
TraesCS7A02G248800	[I]	Lipid transport and metabolism	Molecular Function: hydroxymethylglutaryl-CoA reductase (NADPH) activity (GO:0004420);; Cellular Component: mitochondrion (GO:0005739);; Cellular Component: peroxisomal membrane (GO:0005778);; Cellular Component: endoplasmic reticulum membrane (GO:0005789);; Biological Process: isoprenoid biosynthetic process (GO:0008299);; Biological Process: coenzyme A metabolic process (GO:0015936);; Cellular …	K00021|0|bdi:100840327|K00021 hydroxymethylglutaryl-CoA reductase (NADPH) [EC:1.1.1.34] | (RefSeq) 3-hydroxy-3-methylglutaryl-coenzyme A reductase 3	Terpenoid backbone biosynthesis (ko00900)	3-hydroxy-3-methylglutaryl-coenzyme A reductase 3 OS=Oryza sativa subsp. japonica OX=39947 GN=HMG3 PE=2 SV=2	3-hydroxy-3-methylglutaryl-coenzyme A reductase 3 [Aegilops tauschii subsp. tauschii]
TraesCS2B02G169300	--	--	Cellular Component: integral component of membrane (GO:0016021);;	--	--	C2 domain-containing protein At1g53590 OS=Arabidopsis thaliana OX=3702 GN=NTMC2T6.1 PE=1 SV=2	C2 domain-containing protein At1g53590-like isoform X1 [Aegilops tauschii subsp. tauschii]
TraesCS3B02G188600	--	--	Molecular Function: structural constituent of ribosome (GO:0003735);; Biological Process: translation (GO:0006412);; Cellular Component: chloroplast (GO:0009507);; Cellular Component: large ribosomal subunit (GO:0015934);;	K02911|2.06529e-22|sbi:SobiCp071|K02911 large subunit ribosomal protein L32 | (RefSeq) rpl32; ribosomal protein L32	Ribosome (ko03010)	50S ribosomal protein L32, chloroplastic OS=Triticum aestivum OX=4565 GN=rpl32 PE=3 SV=1	ribosomal protein L32 (chloroplast) [Triticum aestivum]
TraesCS2B02G141900	[P]	Inorganic ion transport and metabolism	Cellular Component: vacuolar membrane (GO:0005774);; Cellular Component: plasma membrane (GO:0005886);; Biological Process: regulation of pH (GO:0006885);; Biological Process: response to salt stress (GO:0009651);; Molecular Function: sodium:proton antiporter activity (GO:0015385);; Cellular Component: integral component of membrane (GO:0016021);; Biological Process: sodium ion transmembrane tran…	--	--	Sodium/hydrogen exchanger 2 OS=Arabidopsis thaliana OX=3702 GN=NHX2 PE=2 SV=2	Na+/H+ antiporter [Triticum aestivum]
Triticum_aestivum_newGene_43167	--	--	Biological Process: metabolic process (GO:0008152);; Molecular Function: hydrolase activity (GO:0016787);;	K17623|3.16837e-23|obr:102703324|K17623 pseudouridine 5'-phosphatase [EC:3.1.3.96] | (RefSeq) (DL)-glycerol-3-phosphatase 2	--	REF/SRPP-like protein OsI_017815 OS=Oryza sativa subsp. indica OX=39946 GN=OsI_017815 PE=3 SV=1	cyclin-dependent kinase 5 homolog isoform X3 [Aegilops tauschii subsp. tauschii]
TraesCS1B02G368300	--	--	Molecular Function: chitinase activity (GO:0004568);; Cellular Component: extracellular region (GO:0005576);; Biological Process: chitin catabolic process (GO:0006032);; Molecular Function: chitin binding (GO:0008061);; Biological Process: xylan catabolic process (GO:0045493);;	K01183|1.22227e-124|bdi:100840859|K01183 chitinase [EC:3.2.1.14] | (RefSeq) xylanase inhibitor protein 1-like	Amino sugar and nucleotide sugar metabolism (ko00520)	Xylanase inhibitor protein 1 OS=Oryza sativa subsp. japonica OX=39947 GN=RIXI PE=1 SV=1	xylanase inhibitor [Triticum aestivum]
Triticum_aestivum_newGene_50500	--	--	Cellular Component: photosystem II (GO:0009523);; Cellular Component: chloroplast thylakoid membrane (GO:0009535);; Biological Process: photosynthetic electron transport in photosystem II (GO:0009772);; Cellular Component: integral component of membrane (GO:0016021);; Molecular Function: chlorophyll binding (GO:0016168);; Biological Process: protein-chromophore linkage (GO:0018298);; Molecular Fu…	K02704|0|mtr:MTR_0002s0740|K02704 photosystem II CP47 chlorophyll apoprotein | (RefSeq) photosystem II CP47 chlorophyll A apoprotein	Photosynthesis (ko00195)	Photosystem II CP47 reaction center protein OS=Triticum aestivum OX=4565 GN=psbB PE=3 SV=2	PsbB (chloroplast) [Taeniatherum caput-medusae]
TraesCS2B02G406400	--	--	Molecular Function: RNA polymerase II regulatory region sequence-specific DNA binding (GO:0000977);; Molecular Function: RNA polymerase II transcription factor binding (GO:0001085);; Molecular Function: transcriptional activator activity, RNA polymerase II transcription regulatory region sequence-specific binding (GO:0001228);; Molecular Function: chromatin binding (GO:0003682);; Cellular Compone…	--	--	GATA transcription factor 5 OS=Arabidopsis thaliana OX=3702 GN=GATA5 PE=2 SV=1	GATA transcription factor 5-like [Aegilops tauschii subsp. tauschii]
TraesCS5D02G551900	[G]	Carbohydrate transport and metabolism	Molecular Function: sucrose alpha-glucosidase activity (GO:0004575);; Cellular Component: cell wall (GO:0005618);; Biological Process: carbohydrate metabolic process (GO:0005975);; Biological Process: cellular amino acid metabolic process (GO:0006520);; Cellular Component: integral component of membrane (GO:0016021);; Molecular Function: oxidoreductase activity (GO:0016491);; Cellular Component: …	K20848|0|osa:4324001|K20848 fructan beta-(2,1)-fructosidase [EC:3.2.1.153] | (RefSeq) CIN4, OsCIN4; beta-fructofuranosidase, insoluble isoenzyme 4	Galactose metabolism (ko00052);; Starch and sucrose metabolism (ko00500)	Beta-fructofuranosidase, insoluble isoenzyme 4 OS=Oryza sativa subsp. japonica OX=39947 GN=CIN4 PE=2 SV=1	beta-fructofuranosidase, insoluble isoenzyme 4-like isoform X1 [Aegilops tauschii subsp. tauschii]
TraesCS6A02G122200	[M]	Cell wall/membrane/envelope biogenesis	Molecular Function: protein serine/threonine kinase activity (GO:0004674);; Molecular Function: ATP binding (GO:0005524);; Biological Process: protein phosphorylation (GO:0006468);; Cellular Component: integral component of membrane (GO:0016021);;	--	--	Putative leucine-rich repeat receptor-like protein kinase At2g19210 OS=Arabidopsis thaliana OX=3702 GN=At2g19210 PE=3 SV=1	probable LRR receptor-like serine/threonine-protein kinase At1g05700 [Aegilops tauschii subsp. tauschii]
TraesCS5D02G488700	[Q]	Secondary metabolites biosynthesis, transport and catabolism	Biological Process: flavonoid biosynthetic process (GO:0009813);; Molecular Function: naringenin-chalcone synthase activity (GO:0016210);;	K00660|0|osa:4350636|K00660 chalcone synthase [EC:2.3.1.74] | (RefSeq) CHS, CHS1, OsCHS1, OsJ_032788; chalcone synthase 1	Flavonoid biosynthesis (ko00941);; Circadian rhythm - plant (ko04712)	Chalcone synthase 2 OS=Secale cereale OX=4550 GN=CHS2 PE=2 SV=1	chalcone synthase 2-like [Aegilops tauschii subsp. tauschii]
TraesCS2B02G516700	[G]	Carbohydrate transport and metabolism	Molecular Function: sucrose alpha-glucosidase activity (GO:0004575);; Cellular Component: extracellular region (GO:0005576);; Biological Process: carbohydrate metabolic process (GO:0005975);;	K01193|0|sita:101781847|K01193 beta-fructofuranosidase [EC:3.2.1.26] | (RefSeq) beta-fructofuranosidase, insoluble isoenzyme 7-like	Galactose metabolism (ko00052);; Starch and sucrose metabolism (ko00500)	Fructan 6-exohydrolase OS=Triticum aestivum OX=4565 GN=6-FEH PE=1 SV=1	fructan 6-exohydrolase-like isoform X2 [Aegilops tauschii subsp. tauschii]
TraesCS5A02G503400	--	--	Cellular Component: nucleus (GO:0005634);; Molecular Function: protein dimerization activity (GO:0046983);;	--	--	Transcription factor bHLH93 OS=Arabidopsis thaliana OX=3702 GN=BHLH93 PE=1 SV=1	transcription factor bHLH93-like [Aegilops tauschii subsp. tauschii]
TraesCS1A02G203200	--	--	Cellular Component: extracellular region (GO:0005576);; Cellular Component: plant-type cell wall (GO:0009505);; Cellular Component: plasmodesma (GO:0009506);; Cellular Component: membrane (GO:0016020);;	--	--	Expansin-like A2 OS=Oryza sativa subsp. japonica OX=39947 GN=EXLA2 PE=2 SV=1	expansin-like A2 [Aegilops tauschii subsp. tauschii]
TraesCS6B02G406300	[G]	Carbohydrate transport and metabolism	Molecular Function: zinc ion binding (GO:0008270);; Biological Process: lignin biosynthetic process (GO:0009809);; Molecular Function: cinnamyl-alcohol dehydrogenase activity (GO:0045551);; Molecular Function: sinapyl alcohol dehydrogenase activity (GO:0052747);; Biological Process: oxidation-reduction process (GO:0055114);;	K00083|0|bdi:100835744|K00083 cinnamyl-alcohol dehydrogenase [EC:1.1.1.195] | (RefSeq) putative cinnamyl alcohol dehydrogenase 5	Phenylpropanoid biosynthesis (ko00940)	Probable cinnamyl alcohol dehydrogenase 5 OS=Oryza sativa subsp. japonica OX=39947 GN=CAD5 PE=3 SV=2	probable cinnamyl alcohol dehydrogenase 5 [Aegilops tauschii subsp. tauschii]
Triticum_aestivum_newGene_68758	--	--	--	--	--	--	predicted protein [Hordeum vulgare subsp. vulgare]
TraesCS5D02G001100	--	--	Molecular Function: hydrolase activity, hydrolyzing O-glycosyl compounds (GO:0004553);; Biological Process: carbohydrate metabolic process (GO:0005975);; Cellular Component: integral component of membrane (GO:0016021);; Molecular Function: polysaccharide binding (GO:0030247);; Cellular Component: anchored component of plasma membrane (GO:0046658);;	--	--	Glucan endo-1,3-beta-glucosidase 5 OS=Arabidopsis thaliana OX=3702 GN=At4g31140 PE=1 SV=1	glucan endo-1,3-beta-glucosidase 5 [Aegilops tauschii subsp. tauschii]
TraesCS3D02G492500	[R]	General function prediction only	Biological Process: xylan biosynthetic process (GO:0045492);;	--	--	Probable methyltransferase At1g27930 OS=Arabidopsis thaliana OX=3702 GN=At1g27930 PE=1 SV=1	probable methyltransferase At1g27930 [Aegilops tauschii subsp. tauschii]
TraesCS3A02G389800	[J]	Translation, ribosomal structure and biogenesis	Molecular Function: nucleotide binding (GO:0000166);; Molecular Function: nucleic acid binding (GO:0003676);; Molecular Function: transferase activity, transferring glycosyl groups (GO:0016757);;	K12831|8.59079e-113|bdi:100841208|K12831 splicing factor 3B subunit 4 | (RefSeq) spliceosome-associated protein 49-like	Spliceosome (ko03040)	Cleavage stimulating factor 64 OS=Arabidopsis thaliana OX=3702 GN=CSTF64 PE=1 SV=1	predicted protein [Hordeum vulgare subsp. vulgare]
Triticum_aestivum_newGene_8642	--	--	Molecular Function: ATP binding (GO:0005524);; Cellular Component: integral component of membrane (GO:0016021);; Molecular Function: ATPase activity, coupled to transmembrane movement of substances (GO:0042626);; Biological Process: transmembrane transport (GO:0055085);;	K05658|6.54402e-13|obr:102706565|K05658 ATP-binding cassette, subfamily B (MDR/TAP), member 1 [EC:3.6.3.44] | (RefSeq) ABC transporter B family member 21-like	ABC transporters (ko02010)	ABC transporter B family member 9 OS=Arabidopsis thaliana OX=3702 GN=ABCB9 PE=3 SV=2	Os05g0137100, partial [Oryza sativa Japonica Group]
TraesCS3A02G140100	--	--	Cellular Component: mitochondrion (GO:0005739);; Biological Process: transcription, DNA-templated (GO:0006351);; Biological Process: leaf morphogenesis (GO:0009965);; Biological Process: cell differentiation (GO:0030154);; Biological Process: positive regulation of development, heterochronic (GO:0045962);;	--	--	Transcription factor PCF5 OS=Oryza sativa subsp. indica OX=39946 GN=PCF5 PE=4 SV=1	unnamed protein product [Triticum aestivum]
TraesCS3B02G037000	--	--	Molecular Function: serine-type endopeptidase inhibitor activity (GO:0004867);; Cellular Component: extracellular region (GO:0005576);; Biological Process: negative regulation of endopeptidase activity (GO:0010951);;	--	--	Bowman-Birk type trypsin inhibitor OS=Hordeum vulgare OX=4513 GN=BBBI PE=1 SV=1	unnamed protein product [Triticum aestivum]
TraesCS2B02G626600	[E]	Amino acid transport and metabolism	Molecular Function: transporter activity (GO:0005215);; Biological Process: transport (GO:0006810);; Cellular Component: integral component of membrane (GO:0016021);;	K14638|0|bdi:100831794|K14638 solute carrier family 15 (peptide/histidine transporter), member 3/4 | (RefSeq) protein NRT1/ PTR FAMILY 5.10-like	--	Protein NRT1/ PTR FAMILY 5.10 OS=Arabidopsis thaliana OX=3702 GN=NPF5.10 PE=2 SV=1	protein NRT1/ PTR FAMILY 5.10-like [Aegilops tauschii subsp. tauschii]
TraesCS4B02G237500	[QV]	Secondary metabolites biosynthesis, transport and catabolism;; Defense mechanisms	Molecular Function: monooxygenase activity (GO:0004497);; Molecular Function: iron ion binding (GO:0005506);; Biological Process: sterol metabolic process (GO:0016125);; Molecular Function: oxidoreductase activity, acting on paired donors, with incorporation or reduction of molecular oxygen (GO:0016705);; Molecular Function: heme binding (GO:0020037);; Molecular Function: hydroperoxide dehydratas…	K01723|0|bdi:100844110|K01723 hydroperoxide dehydratase [EC:4.2.1.92] | (RefSeq) allene oxide synthase 2-like	alpha-Linolenic acid metabolism (ko00592)	Allene oxide synthase 2 OS=Oryza sativa subsp. japonica OX=39947 GN=CYP74A2 PE=2 SV=2	allene oxide synthase 2-like [Aegilops tauschii subsp. tauschii]
TraesCS6B02G161400	[R]	General function prediction only	--	K13457|0|osa:9268330|K13457 disease resistance protein RPM1 | (RefSeq) disease resistance protein RPM1	--	Disease resistance protein RPM1 OS=Arabidopsis thaliana OX=3702 GN=RPM1 PE=1 SV=1	PREDICTED: disease resistance protein RPM1 isoform X1 [Oryza sativa Japonica Group]
TraesCS2B02G504000	--	--	Molecular Function: methyltransferase activity (GO:0008168);; Biological Process: methylation (GO:0032259);; Molecular Function: metal ion binding (GO:0046872);;	--	--	Histone-lysine N-methyltransferase ATXR2 OS=Arabidopsis thaliana OX=3702 GN=ATXR2 PE=2 SV=1	histone-lysine N-methyltransferase ATXR2 [Aegilops tauschii subsp. tauschii]
TraesCS2B02G178000	--	--	Molecular Function: DNA binding (GO:0003677);;	K09422|1.03656e-72|sita:101783180|K09422 myb proto-oncogene protein, plant | (RefSeq) myb-related protein Zm1-like	--	Transcription factor MYB86 OS=Arabidopsis thaliana OX=3702 GN=MYB86 PE=2 SV=1	transcription factor MYB3-like [Aegilops tauschii subsp. tauschii]
TraesCS7B02G308800	[E]	Amino acid transport and metabolism	Molecular Function: nucleic acid binding (GO:0003676);; Molecular Function: prephenate dehydrogenase (NADP+) activity (GO:0004665);; Biological Process: tyrosine biosynthetic process (GO:0006571);; Molecular Function: zinc ion binding (GO:0008270);; Molecular Function: prephenate dehydrogenase (NAD+) activity (GO:0008977);; Cellular Component: chloroplast (GO:0009507);; Biological Process: oxidat…	K15227|0|bdi:100828973|K15227 arogenate dehydrogenase (NADP+), plant [EC:1.3.1.78] | (RefSeq) arogenate dehydrogenase 2, chloroplastic-like	Phenylalanine, tyrosine and tryptophan biosynthesis (ko00400);; Biosynthesis of amino acids (ko01230)	Arogenate dehydrogenase 2, chloroplastic OS=Arabidopsis thaliana OX=3702 GN=TYRAAT2 PE=1 SV=1	predicted protein [Hordeum vulgare subsp. vulgare]
Triticum_aestivum_newGene_69483	--	--	--	--	--	--	hypothetical protein BRADI_1g68395v3, partial [Brachypodium distachyon]
TraesCS2B02G154200	--	--	--	--	--	--	uncharacterized protein LOC109731712 [Aegilops tauschii subsp. tauschii]
TraesCS6D02G127800	[O]	Posttranslational modification, protein turnover, chaperones	Molecular Function: glutathione transferase activity (GO:0004364);; Cellular Component: cytoplasm (GO:0005737);; Biological Process: glutathione metabolic process (GO:0006749);; Biological Process: toxin catabolic process (GO:0009407);;	K00799|1.72188e-91|bdi:100843120|K00799 glutathione S-transferase [EC:2.5.1.18] | (RefSeq) probable glutathione S-transferase GSTU6	Glutathione metabolism (ko00480)	Probable glutathione S-transferase GSTU6 OS=Oryza sativa subsp. japonica OX=39947 GN=GSTU6 PE=2 SV=2	probable glutathione S-transferase GSTU6 [Aegilops tauschii subsp. tauschii]
TraesCS2B02G348500	[E]	Amino acid transport and metabolism	Biological Process: tryptophan biosynthetic process (GO:0000162);; Molecular Function: nucleic acid binding (GO:0003676);; Molecular Function: indole-3-glycerol-phosphate synthase activity (GO:0004425);; Molecular Function: phosphoribosylanthranilate isomerase activity (GO:0004640);; Cellular Component: nucleus (GO:0005634);;	K01609|0|bdi:100831910|K01609 indole-3-glycerol phosphate synthase [EC:4.1.1.48] | (RefSeq) indole-3-glycerol phosphate synthase, chloroplastic-like	Phenylalanine, tyrosine and tryptophan biosynthesis (ko00400);; Biosynthesis of amino acids (ko01230)	Indole-3-glycerol phosphate synthase, chloroplastic OS=Arabidopsis thaliana OX=3702 GN=IGPS PE=1 SV=2	indole-3-glycerol phosphate synthase, chloroplastic-like isoform X1 [Aegilops tauschii subsp. tauschii]
Triticum_aestivum_newGene_8175	--	--	--	--	--	Protein FAR1-RELATED SEQUENCE 5 OS=Arabidopsis thaliana OX=3702 GN=FRS5 PE=1 SV=1	protein FAR1-RELATED SEQUENCE 5-like [Aegilops tauschii subsp. tauschii]
Triticum_aestivum_newGene_96821	--	--	--	--	--	Alkaline/neutral invertase CINV1 OS=Arabidopsis thaliana OX=3702 GN=CINV1 PE=1 SV=1	hypothetical protein TRIUR3_05898 [Triticum urartu]
TraesCS4D02G119400	--	--	Molecular Function: calcium ion binding (GO:0005509);; Cellular Component: plastid (GO:0009536);; Cellular Component: integral component of membrane (GO:0016021);;	--	--	Vacuolar-sorting receptor 1 OS=Arabidopsis thaliana OX=3702 GN=VSR1 PE=1 SV=2	vacuolar-sorting receptor 1-like [Aegilops tauschii subsp. tauschii]
TraesCS5A02G532700	--	--	--	--	--	--	hypothetical protein TRIUR3_04505 [Triticum urartu]
TraesCS1D02G161900	[S]	Function unknown	Biological Process: carbohydrate metabolic process (GO:0005975);; Cellular Component: plant-type cell wall (GO:0009505);; Biological Process: response to fungus (GO:0009620);; Biological Process: positive regulation of flower development (GO:0009911);; Biological Process: leaf morphogenesis (GO:0009965);; Cellular Component: integral component of membrane (GO:0016021);; Cellular Component: apopla…	K07407|0|bdi:100831756|K07407 alpha-galactosidase [EC:3.2.1.22] | (RefSeq) alpha-galactosidase	Galactose metabolism (ko00052);; Glycerolipid metabolism (ko00561);; Sphingolipid metabolism (ko00600);; Glycosphingolipid biosynthesis - globo series (ko00603)	Alpha-galactosidase OS=Oryza sativa subsp. japonica OX=39947 GN=Os10g0493600 PE=1 SV=1	alpha-galactosidase-like [Aegilops tauschii subsp. tauschii]
TraesCS7D02G422300	--	--	Cellular Component: integral component of membrane (GO:0016021);;	--	--	--	hypothetical protein TRIUR3_17723 [Triticum urartu]
TraesCS2B02G322900	--	--	Cellular Component: peroxisome (GO:0005777);;	K17362|6.44415e-72|bdi:100839357|K17362 acyl-coenzyme A thioesterase 13 [EC:3.1.2.-] | (RefSeq) acyl-coenzyme A thioesterase 13	--	--	acyl-coenzyme A thioesterase 13-like [Aegilops tauschii subsp. tauschii]
TraesCS6B02G130700	--	--	Cellular Component: chloroplast (GO:0009507);; Molecular Function: polysaccharide binding (GO:0030247);;	--	--	Protein PTST, chloroplastic OS=Arabidopsis thaliana OX=3702 GN=PTST PE=1 SV=1	protein PTST, chloroplastic-like isoform X1 [Aegilops tauschii subsp. tauschii]
TraesCS7B02G412400	--	--	--	--	--	--	uncharacterized protein LOC109767342 [Aegilops tauschii subsp. tauschii]
TraesCS5A02G233100	[QV]	Secondary metabolites biosynthesis, transport and catabolism;; Defense mechanisms	Molecular Function: iron ion binding (GO:0005506);; Cellular Component: integral component of membrane (GO:0016021);; Molecular Function: oxidoreductase activity, acting on paired donors, with incorporation or reduction of molecular oxygen, NAD(P)H as one donor, and incorporation of one atom of oxygen (GO:0016709);; Molecular Function: heme binding (GO:0020037);; Biological Process: secondary met…	--	--	Oryzalexin D synthase OS=Oryza sativa subsp. japonica OX=39947 GN=CYP76M8 PE=1 SV=1	cytochrome P450 76M5-like [Aegilops tauschii subsp. tauschii]
TraesCS5A02G338300	[T]	Signal transduction mechanisms	Molecular Function: protein serine/threonine kinase activity (GO:0004674);; Molecular Function: ATP binding (GO:0005524);; Cellular Component: plasma membrane (GO:0005886);; Biological Process: protein phosphorylation (GO:0006468);; Biological Process: defense response (GO:0006952);; Cellular Component: plasmodesma (GO:0009506);; Cellular Component: integral component of membrane (GO:0016021);;	--	--	Cysteine-rich receptor-like protein kinase 6 OS=Oryza sativa subsp. japonica OX=39947 GN=CRK6 PE=1 SV=1	Cysteine-rich receptor-like protein kinase 10 [Triticum urartu]
Triticum_aestivum_newGene_90984	--	--	--	--	--	Putative ribonuclease H protein At1g65750 OS=Arabidopsis thaliana OX=3702 GN=At1g65750 PE=3 SV=1	hypothetical protein OsI_17322 [Oryza sativa Indica Group]
Triticum_aestivum_newGene_45517	[K]	Transcription	Molecular Function: O-methyltransferase activity (GO:0008171);; Molecular Function: S-adenosylmethionine-dependent methyltransferase activity (GO:0008757);; Biological Process: aromatic compound biosynthetic process (GO:0019438);;	--	--	Acetylserotonin O-methyltransferase 1 OS=Oryza sativa subsp. japonica OX=39947 GN=ASMT1 PE=1 SV=1	acetylserotonin O-methyltransferase 3-like [Aegilops tauschii subsp. tauschii]
TraesCS3B02G339300	[Q]	Secondary metabolites biosynthesis, transport and catabolism	Molecular Function: diacylglycerol O-acyltransferase activity (GO:0004144);; Cellular Component: plasma membrane (GO:0005886);; Cellular Component: integral component of membrane (GO:0016021);; Biological Process: triglyceride biosynthetic process (GO:0019432);; Molecular Function: long-chain-alcohol O-fatty-acyltransferase activity (GO:0047196);;	--	--	O-acyltransferase WSD1 OS=Arabidopsis thaliana OX=3702 GN=WSD1 PE=2 SV=1	O-acyltransferase WSD1-like [Aegilops tauschii subsp. tauschii]
TraesCS7A02G423900	[T]	Signal transduction mechanisms	Molecular Function: protein serine/threonine phosphatase activity (GO:0004722);; Biological Process: protein dephosphorylation (GO:0006470);; Molecular Function: metal ion binding (GO:0046872);;	K17506|0|bdi:100837967|K17506 protein phosphatase 1L [EC:3.1.3.16] | (RefSeq) probable protein phosphatase 2C 59	--	Probable protein phosphatase 2C 59 OS=Oryza sativa subsp. japonica OX=39947 GN=Os06g0698300 PE=2 SV=1	putative protein phosphatase 2C 59 [Triticum urartu]
TraesCSU02G219600	--	--	Molecular Function: cysteine-type endopeptidase activity (GO:0004197);; Cellular Component: extracellular space (GO:0005615);; Cellular Component: mitochondrion (GO:0005739);; Cellular Component: lysosome (GO:0005764);; Cellular Component: plastid (GO:0009536);; Biological Process: proteolysis involved in cellular protein catabolic process (GO:0051603);;	--	--	KDEL-tailed cysteine endopeptidase CEP3 OS=Arabidopsis thaliana OX=3702 GN=CEP3 PE=2 SV=1	PREDICTED: uncharacterized protein LOC107305514 [Oryza brachyantha]
TraesCS1B02G111200	--	--	Cellular Component: integral component of membrane (GO:0016021);;	--	--	--	low-affinity cation transporter [Triticum aestivum]
TraesCS3B02G062800	--	--	Biological Process: lipid transport (GO:0006869);; Molecular Function: lipid binding (GO:0008289);;	--	--	Non-specific lipid-transfer protein Cw18 OS=Hordeum vulgare OX=4513 GN=CW18 PE=1 SV=1	unnamed protein product [Triticum aestivum]
TraesCS3A02G245300	[R]	General function prediction only	Molecular Function: ARF guanyl-nucleotide exchange factor activity (GO:0005086);; Cellular Component: trans-Golgi network (GO:0005802);; Biological Process: pollen germination (GO:0009846);; Biological Process: vesicle-mediated transport (GO:0016192);; Biological Process: regulation of ARF protein signal transduction (GO:0032012);; Biological Process: positive regulation of GTPase activity (GO:00…	K18443|0|bdi:100825923|K18443 golgi-specific brefeldin A-resistance guanine nucleotide exchange factor 1 | (RefSeq) ARF guanine-nucleotide exchange factor GNL2	Endocytosis (ko04144)	ARF guanine-nucleotide exchange factor GNL2 OS=Arabidopsis thaliana OX=3702 GN=GNL2 PE=2 SV=1	unnamed protein product [Triticum aestivum]
TraesCS5B02G240700	[I]	Lipid transport and metabolism	Biological Process: metabolic process (GO:0008152);; Cellular Component: integral component of membrane (GO:0016021);; Molecular Function: hydrolase activity (GO:0016787);;	--	--	Probable carboxylesterase 2 OS=Arabidopsis thaliana OX=3702 GN=CXE2 PE=2 SV=1	probable carboxylesterase 2 [Aegilops tauschii subsp. tauschii]
Triticum_aestivum_newGene_69568	--	--	--	--	--	--	NBS-type putative resistance protein, partial [Triticum aestivum/Thinopyrum intermedium alien addition line]
TraesCS5B02G500700	[G]	Carbohydrate transport and metabolism	Biological Process: flavonoid biosynthetic process (GO:0009813);; Cellular Component: intracellular membrane-bounded organelle (GO:0043231);; Biological Process: flavonoid glucuronidation (GO:0052696);; Molecular Function: quercetin 3-O-glucosyltransferase activity (GO:0080043);; Molecular Function: quercetin 7-O-glucosyltransferase activity (GO:0080044);;	--	--	DIMBOA UDP-glucosyltransferase BX8 OS=Zea mays OX=4577 GN=Bx8 PE=1 SV=1	DIMBOA UDP-glucosyltransferase BX8-like [Aegilops tauschii subsp. tauschii]
Triticum_aestivum_newGene_6622	--	--	Molecular Function: nucleic acid binding (GO:0003676);; Biological Process: DNA metabolic process (GO:0006259);;	--	--	V-type proton ATPase subunit B 2 (Fragment) OS=Gossypium hirsutum OX=3635 PE=2 SV=1	P0650D04.11 [Oryza sativa Japonica Group]
TraesCS2B02G266000	[G]	Carbohydrate transport and metabolism	Molecular Function: sugar:proton symporter activity (GO:0005351);; Molecular Function: glucose transmembrane transporter activity (GO:0005355);; Molecular Function: myo-inositol:proton symporter activity (GO:0005366);; Cellular Component: integral component of plasma membrane (GO:0005887);; Biological Process: myo-inositol transport (GO:0015798);; Biological Process: proton transport (GO:0015992)…	K08150|0|sita:101758845|K08150 MFS transporter, SP family, solute carrier family 2 (myo-inositol transporter), member 13 | (RefSeq) probable inositol transporter 2	--	Probable inositol transporter 2 OS=Arabidopsis thaliana OX=3702 GN=INT2 PE=1 SV=1	probable inositol transporter 2 [Aegilops tauschii subsp. tauschii]
TraesCS1B02G274500	[GI]	Carbohydrate transport and metabolism;; Lipid transport and metabolism	Cellular Component: extracellular region (GO:0005576);; Cellular Component: cell wall (GO:0005618);; Molecular Function: pectinesterase activity (GO:0030599);; Biological Process: cell wall modification (GO:0042545);; Biological Process: negative regulation of catalytic activity (GO:0043086);; Molecular Function: aspartyl esterase activity (GO:0045330);; Biological Process: pectin catabolic proce…	K01051|0|osa:4327282|K01051 pectinesterase [EC:3.1.1.11] | (RefSeq) probable pectinesterase/pectinesterase inhibitor 41	Pentose and glucuronate interconversions (ko00040);; Starch and sucrose metabolism (ko00500)	Probable pectinesterase/pectinesterase inhibitor 41 OS=Arabidopsis thaliana OX=3702 GN=PME41 PE=2 SV=2	pectinesterase-like [Aegilops tauschii subsp. tauschii]
Triticum_aestivum_newGene_71594	[V]	Defense mechanisms	Molecular Function: ATP binding (GO:0005524);; Biological Process: flavonoid biosynthetic process (GO:0009813);; Cellular Component: integral component of membrane (GO:0016021);; Molecular Function: ATPase activity, coupled to transmembrane movement of substances (GO:0042626);; Cellular Component: intracellular membrane-bounded organelle (GO:0043231);; Biological Process: flavonoid glucuronidatio…	--	--	ABC transporter B family member 2 OS=Arabidopsis thaliana OX=3702 GN=ABCB2 PE=1 SV=3	UDP-glucose flavonoid 3-O-glucosyltransferase 7-like [Aegilops tauschii subsp. tauschii]
TraesCS2D02G225400	--	--	Cellular Component: plasma membrane (GO:0005886);; Cellular Component: integral component of membrane (GO:0016021);; Molecular Function: transmembrane transporter activity (GO:0022857);; Biological Process: transmembrane transport (GO:0055085);;	--	--	WAT1-related protein At5g64700 OS=Arabidopsis thaliana OX=3702 GN=At5g64700 PE=2 SV=1	WAT1-related protein At5g64700-like [Aegilops tauschii subsp. tauschii]
Triticum_aestivum_newGene_44722	--	--	--	--	--	--	unnamed protein product [Triticum aestivum]
TraesCS2B02G328100	[C]	Energy production and conversion	Molecular Function: NADPH dehydrogenase activity (GO:0003959);; Cellular Component: mitochondrion (GO:0005739);; Molecular Function: FMN binding (GO:0010181);; Biological Process: oxylipin biosynthetic process (GO:0031408);; Biological Process: oxidation-reduction process (GO:0055114);;	K05894|0|bdi:100828447|K05894 12-oxophytodienoic acid reductase [EC:1.3.1.42] | (RefSeq) putative 12-oxophytodienoate reductase 11	alpha-Linolenic acid metabolism (ko00592)	Putative 12-oxophytodienoate reductase 11 OS=Oryza sativa subsp. japonica OX=39947 GN=OPR11 PE=2 SV=1	putative 12-oxophytodienoate reductase 11 [Aegilops tauschii subsp. tauschii]
TraesCS5D02G527600	--		Molecular Function: protein serine/threonine kinase activity (GO:0004674);; Molecular Function: ATP binding (GO:0005524);; Cellular Component: plasma membrane (GO:0005886);; Biological Process: protein phosphorylation (GO:0006468);; Cellular Component: integral component of membrane (GO:0016021);;	--	--	Rust resistance kinase Lr10 OS=Triticum aestivum OX=4565 GN=LRK10 PE=2 SV=1	rust resistance kinase Lr10-like [Aegilops tauschii subsp. tauschii]
TraesCS6D02G365500	[QV]	Secondary metabolites biosynthesis, transport and catabolism;; Defense mechanisms	Molecular Function: monooxygenase activity (GO:0004497);; Molecular Function: iron ion binding (GO:0005506);; Biological Process: multicellular organism development (GO:0007275);; Biological Process: brassinosteroid homeostasis (GO:0010268);; Cellular Component: integral component of membrane (GO:0016021);; Biological Process: sterol metabolic process (GO:0016125);; Biological Process: brassinost…	--	--	Cytochrome P450 716B1 OS=Picea sitchensis OX=3332 GN=CYP716B1 PE=2 SV=1	cytochrome P450 716B1-like [Aegilops tauschii subsp. tauschii]
TraesCS7D02G251500	--	--	--	--	--	Nitrate regulatory gene2 protein OS=Arabidopsis thaliana OX=3702 GN=NRG2 PE=1 SV=1	hypothetical protein TRIUR3_25202 [Triticum urartu]
TraesCS2B02G292500	--	--	--	--	--	Protein PRD1 OS=Arabidopsis thaliana OX=3702 GN=PRD1 PE=1 SV=3	protein PRD1 [Aegilops tauschii subsp. tauschii]
TraesCS2B02G145800	[E]	Amino acid transport and metabolism	Biological Process: amino acid transmembrane transport (GO:0003333);; Cellular Component: chloroplast inner membrane (GO:0009706);; Cellular Component: integral component of membrane (GO:0016021);;	K03834|0|obr:102720540|K03834 tyrosine-specific transport protein | (RefSeq) tyrosine-specific transport protein-like	--	--	uncharacterized protein LOC109768305 [Aegilops tauschii subsp. tauschii]
TraesCS4A02G423300	--	--	--	--	--	--	uncharacterized protein LOC109744302 isoform X1 [Aegilops tauschii subsp. tauschii]
TraesCS5B02G437300	[NW]	Cell motility;; Extracellular structures	Molecular Function: protein serine/threonine kinase activity (GO:0004674);; Molecular Function: ATP binding (GO:0005524);; Cellular Component: plasma membrane (GO:0005886);; Biological Process: protein phosphorylation (GO:0006468);; Cellular Component: integral component of membrane (GO:0016021);; Biological Process: recognition of pollen (GO:0048544);;	--	--	G-type lectin S-receptor-like serine/threonine-protein kinase At4g27290 OS=Arabidopsis thaliana OX=3702 GN=At4g27290 PE=3 SV=4	receptor-like serine/threonine-protein kinase SD1-7 [Aegilops tauschii subsp. tauschii]
TraesCS7A02G428200	--	--	Molecular Function: peroxidase activity (GO:0004601);; Cellular Component: extracellular region (GO:0005576);; Cellular Component: mitochondrion (GO:0005739);; Biological Process: response to oxidative stress (GO:0006979);; Molecular Function: heme binding (GO:0020037);; Biological Process: hydrogen peroxide catabolic process (GO:0042744);; Molecular Function: metal ion binding (GO:0046872);; Bio…	K00430|0|osa:4341935|K00430 peroxidase [EC:1.11.1.7] | (RefSeq) peroxidase 16	Phenylpropanoid biosynthesis (ko00940)	Peroxidase 16 OS=Arabidopsis thaliana OX=3702 GN=PER16 PE=1 SV=2	peroxidase 16-like [Aegilops tauschii subsp. tauschii]
Triticum_aestivum_newGene_72485	[QV]	Secondary metabolites biosynthesis, transport and catabolism;; Defense mechanisms	Molecular Function: monooxygenase activity (GO:0004497);; Molecular Function: iron ion binding (GO:0005506);; Cellular Component: integral component of membrane (GO:0016021);; Molecular Function: oxidoreductase activity, acting on paired donors, with incorporation or reduction of molecular oxygen (GO:0016705);; Molecular Function: heme binding (GO:0020037);; Biological Process: oxidation-reductio…	--	--	Geraniol 8-hydroxylase OS=Swertia mussotii OX=137888 GN=CYP76B10 PE=1 SV=1	predicted protein [Hordeum vulgare subsp. vulgare]
TraesCS2B02G326200	--	--	Molecular Function: transporter activity (GO:0005215);; Biological Process: oligopeptide transport (GO:0006857);; Cellular Component: integral component of membrane (GO:0016021);;	--	--	Protein NRT1/ PTR FAMILY 4.3 OS=Arabidopsis thaliana OX=3702 GN=NPF4.3 PE=2 SV=1	protein NRT1/ PTR FAMILY 4.3-like [Aegilops tauschii subsp. tauschii]
TraesCS2D02G013100	[K]	Transcription	Molecular Function: protein serine/threonine kinase activity (GO:0004674);; Molecular Function: ATP binding (GO:0005524);; Biological Process: protein phosphorylation (GO:0006468);; Cellular Component: integral component of membrane (GO:0016021);;	--	--	Probable LRR receptor-like serine/threonine-protein kinase At3g47570 OS=Arabidopsis thaliana OX=3702 GN=At3g47570 PE=2 SV=1	probable LRR receptor-like serine/threonine-protein kinase At3g47570 [Aegilops tauschii subsp. tauschii]
TraesCS7A02G394100	[N]	Cell motility	Cellular Component: integral component of membrane (GO:0016021);;	K13680|0|pda:103717687|K13680 beta-mannan synthase [EC:2.4.1.32] | (RefSeq) glucomannan 4-beta-mannosyltransferase 9-like	--	Probable mannan synthase 9 OS=Oryza sativa subsp. japonica OX=39947 GN=CSLA9 PE=2 SV=1	hypothetical protein TRIUR3_27071 [Triticum urartu]
TraesCS2B02G369400	[J]	Translation, ribosomal structure and biogenesis	--	--	--	F-box protein At1g78280 OS=Arabidopsis thaliana OX=3702 GN=At1g78280 PE=2 SV=3	F-box protein At1g78280-like isoform X1 [Aegilops tauschii subsp. tauschii]
TraesCS7A02G272800	[V]	Defense mechanisms	Biological Process: drug transmembrane transport (GO:0006855);; Molecular Function: drug transmembrane transporter activity (GO:0015238);; Molecular Function: antiporter activity (GO:0015297);; Cellular Component: integral component of membrane (GO:0016021);;	K03327|0|osa:4346253|K03327 multidrug resistance protein, MATE family | (RefSeq) OJ1479_B11.21; protein DETOXIFICATION 33	--	Protein DETOXIFICATION 33 OS=Arabidopsis thaliana OX=3702 GN=DTX33 PE=2 SV=1	protein DETOXIFICATION 33-like [Aegilops tauschii subsp. tauschii]
Triticum_aestivum_newGene_58524	[O]	Posttranslational modification, protein turnover, chaperones	Molecular Function: glutathione transferase activity (GO:0004364);; Cellular Component: cytoplasm (GO:0005737);; Biological Process: glutathione metabolic process (GO:0006749);; Biological Process: toxin catabolic process (GO:0009407);;	K00799|1.22131e-123|bdi:100843078|K00799 glutathione S-transferase [EC:2.5.1.18] | (RefSeq) probable glutathione S-transferase GSTU6	Glutathione metabolism (ko00480)	Probable glutathione S-transferase GSTU6 OS=Oryza sativa subsp. japonica OX=39947 GN=GSTU6 PE=2 SV=2	probable glutathione S-transferase GSTU6 isoform X1 [Aegilops tauschii subsp. tauschii]
TraesCS6A02G354600	--	--	Biological Process: signal transduction (GO:0007165);; Cellular Component: integral component of membrane (GO:0016021);;	--	--	--	hypothetical protein TRIUR3_18666 [Triticum urartu]
TraesCS1B02G062300	[J]	Translation, ribosomal structure and biogenesis	Molecular Function: protein serine/threonine kinase activity (GO:0004674);; Molecular Function: ATP binding (GO:0005524);; Cellular Component: mitochondrion (GO:0005739);; Biological Process: protein phosphorylation (GO:0006468);; Cellular Component: integral component of membrane (GO:0016021);; Molecular Function: carbohydrate binding (GO:0030246);;	--	--	L-type lectin-domain containing receptor kinase IV.1 OS=Arabidopsis thaliana OX=3702 GN=LECRK41 PE=2 SV=1	L-type lectin-domain containing receptor kinase IV.1-like [Aegilops tauschii subsp. tauschii]
TraesCS2B02G519100	--	--	Molecular Function: agmatine N4-coumaroyltransferase activity (GO:0047634);;	--	--	Agmatine coumaroyltransferase-1 OS=Hordeum vulgare OX=4513 GN=ACT-1 PE=1 SV=1	agmatine coumaroyltransferase-2 [Aegilops tauschii subsp. tauschii]
TraesCS2D02G042200	--	--	--	--	--	Disease resistance protein RPM1 OS=Arabidopsis thaliana OX=3702 GN=RPM1 PE=1 SV=1	putative disease resistance RPP13-like protein 3 isoform X1 [Aegilops tauschii subsp. tauschii]
Triticum_aestivum_newGene_13317	--	--	Molecular Function: transporter activity (GO:0005215);; Cellular Component: integral component of membrane (GO:0016021);; Biological Process: transmembrane transport (GO:0055085);;	--	--	--	predicted protein [Hordeum vulgare subsp. vulgare]
TraesCS2D02G517100	[K]	Transcription	--	--	--	Receptor like protein 21 OS=Arabidopsis thaliana OX=3702 GN=RLP21 PE=3 SV=2	leucine-rich repeat receptor protein kinase EMS1-like [Aegilops tauschii subsp. tauschii]
TraesCS2B02G478900	[DZ]	Cell cycle control, cell division, chromosome partitioning;; Cytoskeleton	Molecular Function: metal ion binding (GO:0046872);;	--	--	PH, RCC1 and FYVE domains-containing protein 1 OS=Arabidopsis thaliana OX=3702 GN=PRAF1 PE=1 SV=1	serine/threonine-protein kinase Nek8-like [Aegilops tauschii subsp. tauschii]
TraesCS6A02G202900	[C]	Energy production and conversion	Cellular Component: mitochondrial inner membrane (GO:0005743);; Molecular Function: ubiquinol-cytochrome-c reductase activity (GO:0008121);; Cellular Component: integral component of membrane (GO:0016021);; Molecular Function: metal ion binding (GO:0046872);; Molecular Function: 2 iron, 2 sulfur cluster binding (GO:0051537);; Biological Process: oxidation-reduction process (GO:0055114);; Cellular…	K00411|6.64841e-158|bdi:100835132|K00411 ubiquinol-cytochrome c reductase iron-sulfur subunit [EC:1.10.2.2] | (RefSeq) cytochrome b-c1 complex subunit Rieske, mitochondrial-like	Oxidative phosphorylation (ko00190)	Cytochrome b-c1 complex subunit Rieske, mitochondrial OS=Zea mays OX=4577 PE=2 SV=1	cytochrome b-c1 complex subunit Rieske, mitochondrial-like [Aegilops tauschii subsp. tauschii]
TraesCS2B02G484200	[M]	Cell wall/membrane/envelope biogenesis	Cellular Component: integral component of membrane (GO:0016021);;	--	--	F-box/kelch-repeat protein At5g60570 OS=Arabidopsis thaliana OX=3702 GN=At5g60570 PE=2 SV=1	F-box/kelch-repeat protein At5g60570-like [Aegilops tauschii subsp. tauschii]
TraesCS2A02G484200	[S]	Function unknown	Cellular Component: integral component of membrane (GO:0016021);; Biological Process: transmembrane transport (GO:0055085);;	--	--	Probable metal-nicotianamine transporter YSL6 OS=Oryza sativa subsp. japonica OX=39947 GN=YSL6 PE=2 SV=1	probable metal-nicotianamine transporter YSL6 isoform X1 [Aegilops tauschii subsp. tauschii]
Triticum_aestivum_newGene_69117	--	--	--	--	--	--	hypothetical protein TRIUR3_10414 [Triticum urartu]
TraesCS2B02G407400	--	--	--	--	--	Trihelix transcription factor GT-2 OS=Arabidopsis thaliana OX=3702 GN=GT-2 PE=2 SV=1	trihelix transcription factor [Triticum aestivum]
TraesCS2B02G468200	[S]	Function unknown	Cellular Component: integral component of membrane (GO:0016021);;	--	--	Uncharacterized membrane protein At4g09580 OS=Arabidopsis thaliana OX=3702 GN=At4g09580 PE=1 SV=1	uncharacterized membrane protein At4g09580 [Aegilops tauschii subsp. tauschii]
TraesCS2B02G158800	[T]	Signal transduction mechanisms	Molecular Function: protein serine/threonine kinase activity (GO:0004674);; Molecular Function: ATP binding (GO:0005524);; Biological Process: protein phosphorylation (GO:0006468);; Cellular Component: integral component of membrane (GO:0016021);; Molecular Function: carbohydrate binding (GO:0030246);;	--	--	L-type lectin-domain containing receptor kinase IV.2 OS=Arabidopsis thaliana OX=3702 GN=LECRK42 PE=2 SV=1	hypothetical protein PAHAL_A01730 [Panicum hallii]
TraesCS3D02G060400	[K]	Transcription	Molecular Function: protein serine/threonine kinase activity (GO:0004674);; Molecular Function: ATP binding (GO:0005524);; Biological Process: protein phosphorylation (GO:0006468);; Cellular Component: integral component of membrane (GO:0016021);;	--	--	Probable LRR receptor-like serine/threonine-protein kinase At3g47570 OS=Arabidopsis thaliana OX=3702 GN=At3g47570 PE=2 SV=1	putative receptor-like protein kinase At3g47110 [Aegilops tauschii subsp. tauschii]
TraesCS2B02G276500	--	--	--	--	--	--	PREDICTED: uncharacterized protein LOC100831669 isoform X4 [Brachypodium distachyon]
TraesCS2B02G367100	--	--	Cellular Component: plastid (GO:0009536);; Cellular Component: integral component of membrane (GO:0016021);;	--	--	--	uncharacterized protein LOC109776299 isoform X1 [Aegilops tauschii subsp. tauschii]
TraesCS1A02G351600	[QV]	Secondary metabolites biosynthesis, transport and catabolism;; Defense mechanisms	Molecular Function: monooxygenase activity (GO:0004497);; Molecular Function: iron ion binding (GO:0005506);; Cellular Component: integral component of membrane (GO:0016021);; Molecular Function: oxidoreductase activity, acting on paired donors, with incorporation or reduction of molecular oxygen (GO:0016705);; Molecular Function: heme binding (GO:0020037);; Biological Process: oxidation-reductio…	K20665|0|bdi:100823617|K20665 jasmonoyl-isoleucine 12-hydroxylase [EC:1.14.-.-] | (RefSeq) cytochrome P450 94B3	--	Cytochrome P450 94B3 OS=Arabidopsis thaliana OX=3702 GN=CYP94B3 PE=1 SV=1	cytochrome P450 94B3-like [Aegilops tauschii subsp. tauschii]
TraesCS7A02G427000	[G]	Carbohydrate transport and metabolism	Molecular Function: hydrolase activity, hydrolyzing O-glycosyl compounds (GO:0004553);; Cellular Component: cell wall (GO:0005618);; Biological Process: xyloglucan metabolic process (GO:0010411);; Molecular Function: xyloglucan:xyloglucosyl transferase activity (GO:0016762);; Biological Process: cell wall biogenesis (GO:0042546);; Cellular Component: apoplast (GO:0048046);; Biological Process: ce…	K08235|3.0316e-173|sita:101771748|K08235 xyloglucan:xyloglucosyl transferase [EC:2.4.1.207] | (RefSeq) probable xyloglucan endotransglucosylase/hydrolase protein 25	--	Probable xyloglucan endotransglucosylase/hydrolase protein 25 OS=Arabidopsis thaliana OX=3702 GN=XTH25 PE=2 SV=2	putative xyloglucan endotransglucosylase/hydrolase protein 23 [Triticum urartu]
TraesCS4D02G134400	--	--	Biological Process: amino acid transmembrane transport (GO:0003333);; Cellular Component: plasma membrane (GO:0005886);; Molecular Function: amino acid transmembrane transporter activity (GO:0015171);; Cellular Component: integral component of membrane (GO:0016021);;	--	--	Probable proline transporter 2 OS=Oryza sativa subsp. japonica OX=39947 GN=LOC_Os07g01090 PE=2 SV=1	probable proline transporter 2 [Aegilops tauschii subsp. tauschii]
TraesCS2D02G543900	--	--	Molecular Function: DNA binding (GO:0003677);; Molecular Function: transcription factor activity, sequence-specific DNA binding (GO:0003700);; Cellular Component: nucleus (GO:0005634);; Biological Process: regulation of transcription, DNA-templated (GO:0006355);;	K09286|1.69273e-23|osa:4337341|K09286 EREBP-like factor | (RefSeq) ethylene-responsive transcription factor 7	--	Ethylene-responsive transcription factor 7 OS=Arabidopsis thaliana OX=3702 GN=ERF7 PE=1 SV=1	ethylene-responsive transcription factor 3-like [Aegilops tauschii subsp. tauschii]
Triticum_aestivum_newGene_96977	--	--	--	--	--	--	hypothetical protein TRIUR3_03444 [Triticum urartu]
TraesCS3B02G406200	--	--	Molecular Function: hydrolase activity, hydrolyzing O-glycosyl compounds (GO:0004553);; Biological Process: carbohydrate metabolic process (GO:0005975);; Cellular Component: integral component of membrane (GO:0016021);; Molecular Function: polysaccharide binding (GO:0030247);; Cellular Component: anchored component of plasma membrane (GO:0046658);;	--	--	Glucan endo-1,3-beta-glucosidase 14 OS=Arabidopsis thaliana OX=3702 GN=At2g27500 PE=1 SV=2	unnamed protein product [Triticum aestivum]
Triticum_aestivum_newGene_64127	--	--	Molecular Function: tryptophan-tRNA ligase activity (GO:0004830);; Molecular Function: ATP binding (GO:0005524);; Cellular Component: cytoplasm (GO:0005737);; Biological Process: tryptophanyl-tRNA aminoacylation (GO:0006436);;	--	--	--	hypothetical protein TRIUR3_20134 [Triticum urartu]
TraesCS1B02G377500	[T]	Signal transduction mechanisms	--	--	--	Putative cysteine-rich receptor-like protein kinase 12 OS=Arabidopsis thaliana OX=3702 GN=CRK12 PE=3 SV=3	PREDICTED: tyrosine-protein kinase JAK2-like isoform X1 [Oryza brachyantha]
TraesCSU02G182800	--	--	--	--	--	--	uncharacterized protein LOC109767773 [Aegilops tauschii subsp. tauschii]
TraesCS6A02G163700	[G]	Carbohydrate transport and metabolism	Molecular Function: magnesium ion binding (GO:0000287);; Cellular Component: mitochondrion (GO:0005739);; Cellular Component: cytosol (GO:0005829);; Biological Process: inositol metabolic process (GO:0006020);; Biological Process: signal transduction (GO:0007165);; Molecular Function: inositol monophosphate 1-phosphatase activity (GO:0008934);; Cellular Component: chloroplast stroma (GO:0009570);…	--	--	Phosphatase IMPL1, chloroplastic OS=Arabidopsis thaliana OX=3702 GN=IMPL1 PE=1 SV=2	phosphatase IMPL1, chloroplastic [Aegilops tauschii subsp. tauschii]
TraesCS2A02G035900	--	--	Molecular Function: transferase activity, transferring acyl groups other than amino-acyl groups (GO:0016747);;	--	--	Uncharacterized acetyltransferase At3g50280 OS=Arabidopsis thaliana OX=3702 GN=At3g50280 PE=3 SV=1	uncharacterized acetyltransferase At3g50280-like [Aegilops tauschii subsp. tauschii]
TraesCS2B02G309500	[G]	Carbohydrate transport and metabolism	Molecular Function: 1,4-alpha-glucan branching enzyme activity (GO:0003844);; Molecular Function: hydrolase activity, hydrolyzing O-glycosyl compounds (GO:0004553);; Biological Process: glycogen biosynthetic process (GO:0005978);; Cellular Component: plastid (GO:0009536);; Molecular Function: cation binding (GO:0043169);;	K00700|0|bdi:100831694|K00700 1,4-alpha-glucan branching enzyme [EC:2.4.1.18] | (RefSeq) 1,4-alpha-glucan-branching enzyme 2, chloroplastic/amyloplastic-like	Starch and sucrose metabolism (ko00500)	1,4-alpha-glucan-branching enzyme 1, chloroplastic/amyloplastic OS=Pisum sativum OX=3888 GN=SBEI PE=1 SV=1	starch branching enzyme IIa [Triticum aestivum]
TraesCS5B02G206300	--		Molecular Function: protein serine/threonine kinase activity (GO:0004674);; Molecular Function: ATP binding (GO:0005524);; Cellular Component: plasma membrane (GO:0005886);; Biological Process: protein phosphorylation (GO:0006468);; Cellular Component: integral component of membrane (GO:0016021);; Biological Process: recognition of pollen (GO:0048544);;	--	--	Putative receptor protein kinase ZmPK1 OS=Zea mays OX=4577 GN=PK1 PE=2 SV=2	putative receptor protein kinase ZmPK1 [Aegilops tauschii subsp. tauschii]
TraesCS6D02G026600	[G]	Carbohydrate transport and metabolism	Molecular Function: sucrose alpha-glucosidase activity (GO:0004575);; Biological Process: carbohydrate metabolic process (GO:0005975);; Cellular Component: integral component of membrane (GO:0016021);; Molecular Function: transferase activity (GO:0016740);;	K01193|0|bdi:100839920|K01193 beta-fructofuranosidase [EC:3.2.1.26] | (RefSeq) sucrose:sucrose 1-fructosyltransferase-like	Galactose metabolism (ko00052);; Starch and sucrose metabolism (ko00500)	Sucrose:sucrose 1-fructosyltransferase OS=Festuca arundinacea OX=4606 GN=1-SST PE=1 SV=1	sucrose:sucrose 1-fructosyltransferase-like [Aegilops tauschii subsp. tauschii]
Triticum_aestivum_newGene_20926	--	--	Cellular Component: photosystem II (GO:0009523);; Cellular Component: chloroplast thylakoid membrane (GO:0009535);; Biological Process: photosynthetic electron transport in photosystem II (GO:0009772);; Cellular Component: integral component of membrane (GO:0016021);; Molecular Function: chlorophyll binding (GO:0016168);; Biological Process: protein-chromophore linkage (GO:0018298);; Molecular Fu…	K02705|1.00367e-168|bdi:6439864|K02705 photosystem II CP43 chlorophyll apoprotein | (RefSeq) psbC, BrdiC_p007; photosystem II 44 kDa protein	Photosynthesis (ko00195)	Photosystem II CP43 reaction center protein OS=Brachypodium distachyon OX=15368 GN=psbC PE=3 SV=1	PsbC, partial (chloroplast) [Deschampsia antarctica]
TraesCS7D02G366200	--	--	Biological Process: amino acid transmembrane transport (GO:0003333);; Cellular Component: plasma membrane (GO:0005886);; Molecular Function: amino acid transmembrane transporter activity (GO:0015171);; Cellular Component: integral component of membrane (GO:0016021);;	--	--	Amino acid permease 1 OS=Arabidopsis thaliana OX=3702 GN=AAP1 PE=1 SV=1	amino acid permease 3-like [Aegilops tauschii subsp. tauschii]
TraesCS4B02G377200	--	--	Cellular Component: extracellular region (GO:0005576);; Molecular Function: manganese ion binding (GO:0030145);; Molecular Function: nutrient reservoir activity (GO:0045735);;	--	--	Germin-like protein 8-5 OS=Oryza sativa subsp. japonica OX=39947 GN=Os08g0189400 PE=2 SV=1	germin-like protein [Triticum aestivum]
Triticum_aestivum_newGene_18945	[G]	Carbohydrate transport and metabolism	Biological Process: polysaccharide catabolic process (GO:0000272);; Molecular Function: chitinase activity (GO:0004568);; Biological Process: chitin catabolic process (GO:0006032);; Biological Process: flavonoid biosynthetic process (GO:0009813);; Biological Process: cell wall macromolecule catabolic process (GO:0016998);; Molecular Function: chalcone isomerase activity (GO:0045430);; Biological …	K20547|3.16046e-73|bdi:100829018|K20547 basic endochitinase B [EC:3.2.1.14] | (RefSeq) chitinase 8-like	Amino sugar and nucleotide sugar metabolism (ko00520)	Chitinase 8 OS=Oryza sativa subsp. japonica OX=39947 GN=Cht8 PE=2 SV=1	chitinase 8-like [Aegilops tauschii subsp. tauschii]
TraesCS6A02G419200	[D]	Cell cycle control, cell division, chromosome partitioning	Molecular Function: ubiquitin-protein transferase activity (GO:0004842);; Biological Process: protein ubiquitination (GO:0016567);;	--	--	U-box domain-containing protein 44 OS=Arabidopsis thaliana OX=3702 GN=PUB44 PE=1 SV=1	ubiquitin ligase, partial [Triticum aestivum]
Triticum_aestivum_newGene_69222	--	--	Cellular Component: integral component of membrane (GO:0016021);; Molecular Function: phosphatidylinositol binding (GO:0035091);;	K17925|3.69092e-94|bdi:100826848|K17925 sorting nexin-13 | (RefSeq) uncharacterized LOC100826848	--	--	uncharacterized protein LOC109766237 [Aegilops tauschii subsp. tauschii]
TraesCSU02G201400	--	--	Cellular Component: mitochondrion (GO:0005739);; Molecular Function: sulfotransferase activity (GO:0008146);;	--	--	Cytosolic sulfotransferase 17 OS=Arabidopsis thaliana OX=3702 GN=SOT17 PE=1 SV=1	cytosolic sulfotransferase 5-like [Aegilops tauschii subsp. tauschii]
TraesCS2A02G158700	--	--	Molecular Function: serine-type endopeptidase inhibitor activity (GO:0004867);; Molecular Function: peptidase activity (GO:0008233);; Biological Process: response to wounding (GO:0009611);; Biological Process: negative regulation of endopeptidase activity (GO:0010951);;	--	--	Subtilisin-chymotrypsin inhibitor-2A OS=Hordeum vulgare OX=4513 PE=1 SV=2	Subtilisin-chymotrypsin inhibitor-2A [Triticum urartu]
TraesCS6A02G247500	--	--	Molecular Function: ubiquitin-protein transferase activity (GO:0004842);; Cellular Component: nucleus (GO:0005634);; Molecular Function: zinc ion binding (GO:0008270);; Biological Process: protein ubiquitination (GO:0016567);; Biological Process: regulation of defense response (GO:0031347);;	K19042|6.01417e-14|bdi:100824034|K19042 E3 ubiquitin-protein ligase BOI and related proteins [EC:2.3.2.27] | (RefSeq) probable BOI-related E3 ubiquitin-protein ligase 3	--	Probable BOI-related E3 ubiquitin-protein ligase 2 OS=Arabidopsis thaliana OX=3702 GN=BRG2 PE=1 SV=1	hypothetical protein TRIUR3_22400 [Triticum urartu]
TraesCS1D02G202300	[H]	Coenzyme transport and metabolism	Cellular Component: endosome (GO:0005768);; Cellular Component: vacuolar membrane (GO:0005774);; Cellular Component: trans-Golgi network (GO:0005802);; Molecular Function: S-adenosylmethionine-dependent methyltransferase activity (GO:0008757);; Cellular Component: integral component of membrane (GO:0016021);; Molecular Function: kinase activity (GO:0016301);; Biological Process: phosphorylation (…	--	--	Probable methyltransferase PMT21 OS=Arabidopsis thaliana OX=3702 GN=ERD3 PE=2 SV=1	probable methyltransferase PMT21 [Aegilops tauschii subsp. tauschii]
TraesCS2B02G528100	[T]	Signal transduction mechanisms	Molecular Function: protein serine/threonine phosphatase activity (GO:0004722);; Biological Process: protein dephosphorylation (GO:0006470);; Molecular Function: metal ion binding (GO:0046872);;	K17506|0|bdi:100842406|K17506 protein phosphatase 1L [EC:3.1.3.16] | (RefSeq) probable protein phosphatase 2C 45	--	Probable protein phosphatase 2C 45 OS=Oryza sativa subsp. japonica OX=39947 GN=Os04g0659500 PE=2 SV=2	probable protein phosphatase 2C 45 isoform X1 [Aegilops tauschii subsp. tauschii]
TraesCS3A02G397900	--	--	Cellular Component: integral component of membrane (GO:0016021);;	--	--	Formin-like protein 1 OS=Oryza sativa subsp. japonica OX=39947 GN=FH1 PE=2 SV=1	unnamed protein product [Triticum aestivum]
Triticum_aestivum_newGene_30937	--	--	Molecular Function: RNA binding (GO:0003723);; Cellular Component: nucleolus (GO:0005730);; Molecular Function: zinc ion binding (GO:0008270);; Biological Process: DNA integration (GO:0015074);;	--	--	--	hypothetical protein TRIUR3_30898 [Triticum urartu]
TraesCSU02G058000	--	--	Molecular Function: nucleotide binding (GO:0000166);; Cellular Component: membrane (GO:0016020);;	K14794|0|bdi:100843447|K14794 ribosomal RNA-processing protein 12 | (RefSeq) ribosomal RNA-processing protein 12-like	--	--	ribosomal RNA-processing protein 12 [Aegilops tauschii subsp. tauschii]
TraesCS2B02G336200	--	--	Cellular Component: mitochondrion (GO:0005739);; Cellular Component: plastid (GO:0009536);;	--	--	Pentatricopeptide repeat-containing protein At5g09450, mitochondrial OS=Arabidopsis thaliana OX=3702 GN=At5g09450 PE=1 SV=1	predicted protein [Hordeum vulgare subsp. vulgare]
Triticum_aestivum_newGene_9478	--	--	--	--	--	Autonomous transposable element EN-1 mosaic protein OS=Zea mays OX=4577 PE=2 SV=1	hypothetical protein TRIUR3_03215 [Triticum urartu]
Triticum_aestivum_newGene_25447	--	--	--	--	--	--	hypothetical protein TRIUR3_15662 [Triticum urartu]
TraesCS5B02G462200	[G]	Carbohydrate transport and metabolism	Cellular Component: cell wall (GO:0005618);; Molecular Function: manganese ion binding (GO:0030145);; Biological Process: oxalate metabolic process (GO:0033609);; Molecular Function: nutrient reservoir activity (GO:0045735);; Molecular Function: oxalate decarboxylase activity (GO:0046564);; Cellular Component: apoplast (GO:0048046);;	--	--	Germin-like protein 3-7 OS=Oryza sativa subsp. japonica OX=39947 GN=GER7 PE=2 SV=1	germin-like protein 3-7 [Aegilops tauschii subsp. tauschii]
Triticum_aestivum_newGene_50563	--	--	--	--	--	--	hypothetical protein PSTG_19865, partial [Puccinia striiformis f. sp. tritici PST-78]
Triticum_aestivum_newGene_59457	--	--	Biological Process: protein ubiquitination (GO:0016567);;	--	--	--	hypothetical protein BRADI_2g20640v3 [Brachypodium distachyon]
Triticum_aestivum_newGene_80982	--	--	--	--	--	--	uncharacterized protein LOC109749713 isoform X1 [Aegilops tauschii subsp. tauschii]
Triticum_aestivum_newGene_39685	--	--	Biological Process: cellular process (GO:0009987);;	--	--	--	uncharacterized protein LOC109785170 [Aegilops tauschii subsp. tauschii]
TraesCS2B02G377100	[T]	Signal transduction mechanisms	Molecular Function: protein serine/threonine kinase activity (GO:0004674);; Molecular Function: ATP binding (GO:0005524);; Biological Process: protein phosphorylation (GO:0006468);;	K04733|0|bdi:100827233|K04733 interleukin-1 receptor-associated kinase 4 [EC:2.7.11.1] | (RefSeq) calmodulin-binding receptor-like cytoplasmic kinase 3	--	Calmodulin-binding receptor-like cytoplasmic kinase 3 OS=Arabidopsis thaliana OX=3702 GN=CRCK3 PE=2 SV=1	calmodulin-binding receptor-like cytoplasmic kinase 3 [Aegilops tauschii subsp. tauschii]
TraesCS2B02G251300	--	--	Molecular Function: zinc ion binding (GO:0008270);; Cellular Component: plastid (GO:0009536);; Biological Process: flavonoid biosynthetic process (GO:0009813);; Biological Process: flavonoid glucuronidation (GO:0052696);; Molecular Function: quercetin 3-O-glucosyltransferase activity (GO:0080043);; Molecular Function: quercetin 7-O-glucosyltransferase activity (GO:0080044);;	K01931|0|bdi:100846253|K01931 protein neuralized [EC:2.3.2.27] | (RefSeq) uncharacterized LOC100846253	--	Probable E3 ubiquitin-protein ligase LUL3 OS=Arabidopsis thaliana OX=3702 GN=LUL3 PE=1 SV=1	uncharacterized protein LOC109776850 [Aegilops tauschii subsp. tauschii]
TraesCS4D02G216600	--		Molecular Function: protein serine/threonine kinase activity (GO:0004674);; Molecular Function: ATP binding (GO:0005524);; Biological Process: protein phosphorylation (GO:0006468);; Biological Process: recognition of pollen (GO:0048544);;	--	--	G-type lectin S-receptor-like serine/threonine-protein kinase At2g19130 OS=Arabidopsis thaliana OX=3702 GN=At2g19130 PE=2 SV=1	G-type lectin S-receptor-like serine/threonine-protein kinase At2g19130 [Aegilops tauschii subsp. tauschii]
Triticum_aestivum_newGene_27075	--	--	--	--	--	--	malonyl-coenzyme:anthocyanin 5-O-glucoside-6&apos;&apos;&apos;-O-malonyltransferase-like [Aegilops tauschii subsp. tauschii]
TraesCS4A02G486000	[G]	Carbohydrate transport and metabolism	Molecular Function: sucrose alpha-glucosidase activity (GO:0004575);; Biological Process: carbohydrate metabolic process (GO:0005975);; Cellular Component: integral component of membrane (GO:0016021);; Molecular Function: sucrose 1F-fructosyltransferase activity (GO:0050306);;	K01193|0|sita:101769910|K01193 beta-fructofuranosidase [EC:3.2.1.26] | (RefSeq) sucrose:sucrose 1-fructosyltransferase-like	Galactose metabolism (ko00052);; Starch and sucrose metabolism (ko00500)	Sucrose:sucrose 1-fructosyltransferase OS=Festuca arundinacea OX=4606 GN=1-SST PE=1 SV=1	sucrose:sucrose-1-fructosyltransferase [Triticum aestivum]
TraesCS3A02G007200	[K]	Transcription	Molecular Function: nucleotide binding (GO:0000166);; Molecular Function: protein kinase activity (GO:0004672);; Cellular Component: membrane (GO:0016020);; Biological Process: phosphorylation (GO:0016310);;	--	--	Probable LRR receptor-like serine/threonine-protein kinase At3g47570 OS=Arabidopsis thaliana OX=3702 GN=At3g47570 PE=2 SV=1	hypothetical protein [Oryza sativa Japonica Group]
TraesCS2A02G286700	--	--	Molecular Function: transcription corepressor activity (GO:0003714);; Cellular Component: nucleus (GO:0005634);; Biological Process: response to wounding (GO:0009611);; Biological Process: regulation of defense response (GO:0031347);; Molecular Function: protein homodimerization activity (GO:0042803);; Biological Process: negative regulation of nucleic acid-templated transcription (GO:1903507);; …	K13464|1.22209e-50|bdi:100821983|K13464 jasmonate ZIM domain-containing protein | (RefSeq) protein TIFY 9	Plant hormone signal transduction (ko04075)	Protein TIFY 9 OS=Oryza sativa subsp. japonica OX=39947 GN=TIFY9 PE=1 SV=1	protein TIFY 9-like [Aegilops tauschii subsp. tauschii]
Triticum_aestivum_newGene_37067	--	--	--	--	--	--	uncharacterized protein LOC109754655 [Aegilops tauschii subsp. tauschii]
TraesCS6B02G440300	[V]	Defense mechanisms	Molecular Function: DNA binding (GO:0003677);; Molecular Function: transcription factor activity, sequence-specific DNA binding (GO:0003700);; Cellular Component: nucleus (GO:0005634);; Cellular Component: mitochondrion (GO:0005739);; Biological Process: regulation of transcription, DNA-templated (GO:0006355);; Biological Process: drug transmembrane transport (GO:0006855);; Molecular Function: dr…	K03327|0|sita:101761532|K03327 multidrug resistance protein, MATE family | (RefSeq) protein DETOXIFICATION 35-like	--	Protein DETOXIFICATION 34 OS=Arabidopsis thaliana OX=3702 GN=DTX34 PE=2 SV=1	predicted protein [Hordeum vulgare subsp. vulgare]
Triticum_aestivum_newGene_3979	--	--	--	--	--	--	disease resistance protein RPP13-like [Aegilops tauschii subsp. tauschii]
TraesCS4D02G298400	--	--	Molecular Function: DNA binding (GO:0003677);; Molecular Function: transcription factor activity, sequence-specific DNA binding (GO:0003700);; Cellular Component: nucleus (GO:0005634);; Biological Process: regulation of transcription, DNA-templated (GO:0006355);; Cellular Component: plastid (GO:0009536);;	--	--	Ethylene-responsive transcription factor RAP2-2 OS=Arabidopsis thaliana OX=3702 GN=RAP2-2 PE=1 SV=2	ethylene-responsive transcription factor 1-like [Aegilops tauschii subsp. tauschii]
TraesCS7D02G188400	[O]	Posttranslational modification, protein turnover, chaperones	Molecular Function: transferase activity (GO:0016740);;	--	--	Glutathione S-transferase U10 OS=Arabidopsis thaliana OX=3702 GN=GSTU10 PE=2 SV=1	hypothetical protein SORBI_3010G092500 [Sorghum bicolor]
Triticum_aestivum_newGene_60197	--	--	--	--	--	--	--
Triticum_aestivum_newGene_66733	--	--	--	--	--	--	predicted protein [Hordeum vulgare subsp. vulgare]
TraesCS5D02G380200	--	--	Cellular Component: nucleus (GO:0005634);; Molecular Function: zinc ion binding (GO:0008270);; Biological Process: protein ubiquitination (GO:0016567);; Molecular Function: ligase activity (GO:0016874);; Biological Process: proteasome-mediated ubiquitin-dependent protein catabolic process (GO:0043161);; Molecular Function: ubiquitin protein ligase activity (GO:0061630);;	K16275|0|bdi:100833458|K16275 E3 ubiquitin-protein ligase BAH [EC:2.3.2.27] | (RefSeq) probable E3 ubiquitin-protein ligase BAH1-like 1	--	Probable E3 ubiquitin-protein ligase BAH1-like 1 OS=Oryza sativa subsp. japonica OX=39947 GN=Os03g0650900 PE=2 SV=1	probable E3 ubiquitin-protein ligase BAH1-like 1 [Aegilops tauschii subsp. tauschii]
TraesCS6A02G121600	--	--	Molecular Function: metal ion binding (GO:0046872);;	--	--	--	uncharacterized protein LOC109753485 [Aegilops tauschii subsp. tauschii]
Triticum_aestivum_newGene_35562	[J]	Translation, ribosomal structure and biogenesis	Molecular Function: structural constituent of ribosome (GO:0003735);; Cellular Component: mitochondrion (GO:0005739);; Biological Process: embryo development ending in seed dormancy (GO:0009793);; Cellular Component: chloroplast envelope (GO:0009941);; Cellular Component: small ribosomal subunit (GO:0015935);; Biological Process: mitochondrial translation (GO:0032543);;	K02959|1.09098e-27|bdi:100834253|K02959 small subunit ribosomal protein S16 | (RefSeq) 30S ribosomal protein S16	Ribosome (ko03010)	30S ribosomal protein S16-2, chloroplastic/mitochondrial OS=Arabidopsis thaliana OX=3702 GN=RPS16-2 PE=2 SV=1	30S ribosomal protein S16-2, chloroplastic/mitochondrial-like [Aegilops tauschii subsp. tauschii]
TraesCS4B02G064500	--	--	--	--	--	--	predicted protein, partial [Hordeum vulgare subsp. vulgare]
Triticum_aestivum_newGene_17634	--	--	--	--	--	--	uncharacterized protein LOC109771516 [Aegilops tauschii subsp. tauschii]
TraesCS1A02G021400	--	--	Molecular Function: serine-type endopeptidase inhibitor activity (GO:0004867);; Cellular Component: extracellular region (GO:0005576);; Biological Process: negative regulation of endopeptidase activity (GO:0010951);;	--	--	Bowman-Birk type trypsin inhibitor OS=Triticum aestivum OX=4565 PE=1 SV=1	Bowman-Birk type trypsin inhibitor [Triticum urartu]
TraesCS2B02G274900	--	--	Molecular Function: hydrolase activity, hydrolyzing O-glycosyl compounds (GO:0004553);; Biological Process: carbohydrate metabolic process (GO:0005975);; Cellular Component: integral component of membrane (GO:0016021);; Molecular Function: polysaccharide binding (GO:0030247);; Cellular Component: anchored component of plasma membrane (GO:0046658);;	K19891|0|bdi:100827650|K19891 glucan endo-1,3-beta-glucosidase 1/2/3 [EC:3.2.1.39] | (RefSeq) glucan endo-1,3-beta-glucosidase 1-like	Starch and sucrose metabolism (ko00500)	Glucan endo-1,3-beta-glucosidase 1 OS=Arabidopsis thaliana OX=3702 GN=At1g11820 PE=1 SV=3	glucan endo-1,3-beta-glucosidase 1-like [Aegilops tauschii subsp. tauschii]
TraesCS2A02G291000	[R]	General function prediction only	Cellular Component: integral component of membrane (GO:0016021);;	--	--	--	heparan-alpha-glucosaminide N-acetyltransferase [Aegilops tauschii subsp. tauschii]
TraesCS5B02G455200	--	--	--	--	--	--	unnamed protein product [Triticum aestivum]
TraesCS6B02G316000	[T]	Signal transduction mechanisms	Cellular Component: Golgi membrane (GO:0000139);; Cellular Component: integral component of membrane (GO:0016021);; Molecular Function: cellulose synthase (UDP-forming) activity (GO:0016760);; Biological Process: cellulose biosynthetic process (GO:0030244);; Biological Process: cell wall organization (GO:0071555);;	--	--	Cellulose synthase-like protein E2 OS=Oryza sativa subsp. japonica OX=39947 GN=CSLE2 PE=2 SV=1	cellulose synthase-like protein E2 [Aegilops tauschii subsp. tauschii]
TraesCS1D02G020600	--	--	Molecular Function: serine-type endopeptidase inhibitor activity (GO:0004867);; Cellular Component: extracellular region (GO:0005576);; Biological Process: negative regulation of endopeptidase activity (GO:0010951);;	--	--	Bowman-Birk type trypsin inhibitor OS=Triticum aestivum OX=4565 PE=1 SV=1	Bowman-Birk type trypsin inhibitor [Triticum urartu]
TraesCS5A02G337500	--	--	Molecular Function: transferase activity, transferring acyl groups other than amino-acyl groups (GO:0016747);;	--	--	Putrescine hydroxycinnamoyltransferase 3 OS=Oryza sativa subsp. japonica OX=39947 GN=PHT3 PE=1 SV=1	putrescine hydroxycinnamoyltransferase 3-like [Aegilops tauschii subsp. tauschii]
TraesCS3B02G267600	--	--	--	--	--	F-box/kelch-repeat protein At3g61590 OS=Arabidopsis thaliana OX=3702 GN=At3g61590 PE=1 SV=1	predicted protein, partial [Hordeum vulgare subsp. vulgare]
Triticum_aestivum_newGene_50296	--	--	--	--	--	--	ORF [Triticum aestivum]
TraesCS4D02G031600	--	--	Cellular Component: cell wall (GO:0005618);; Cellular Component: cytoplasm (GO:0005737);; Molecular Function: manganese ion binding (GO:0030145);; Molecular Function: nutrient reservoir activity (GO:0045735);; Cellular Component: apoplast (GO:0048046);; Molecular Function: oxalate oxidase activity (GO:0050162);; Biological Process: oxidation-reduction process (GO:0055114);;	--	--	Oxalate oxidase 2 OS=Hordeum vulgare OX=4513 PE=2 SV=1	oxalate oxidase GF-2.8-like [Aegilops tauschii subsp. tauschii]
TraesCS2D02G484700	[NW]	Cell motility;; Extracellular structures	Molecular Function: protein serine/threonine kinase activity (GO:0004674);; Molecular Function: ATP binding (GO:0005524);; Cellular Component: plasma membrane (GO:0005886);; Biological Process: protein phosphorylation (GO:0006468);; Biological Process: defense response (GO:0006952);; Cellular Component: plasmodesma (GO:0009506);; Cellular Component: integral component of membrane (GO:0016021);; B…	--	--	G-type lectin S-receptor-like serine/threonine-protein kinase At1g11330 OS=Arabidopsis thaliana OX=3702 GN=At1g11330 PE=1 SV=3	G-type lectin S-receptor-like serine/threonine-protein kinase B120 isoform X2 [Aegilops tauschii subsp. tauschii]
Triticum_aestivum_newGene_69863	--	--	--	--	--	--	replication protein A 70 kDa DNA-binding subunit B-like [Aegilops tauschii subsp. tauschii]
TraesCS2B02G157900	--	--	Cellular Component: integral component of membrane (GO:0016021);;	--	--	--	CTL-like protein DDB_G0274487 [Aegilops tauschii subsp. tauschii]
TraesCS7B02G364600	--	--	Molecular Function: DNA binding (GO:0003677);; Cellular Component: nucleus (GO:0005634);; Biological Process: regulation of transcription, DNA-templated (GO:0006355);;	--	--	NAC domain-containing protein 21/22 OS=Arabidopsis thaliana OX=3702 GN=NAC021 PE=1 SV=2	NAC domain-containing protein 23 [Triticum aestivum]
TraesCS7B02G367400	--	--	Molecular Function: DNA binding (GO:0003677);; Cellular Component: nucleus (GO:0005634);; Biological Process: regulation of transcription, DNA-templated (GO:0006355);; Biological Process: mRNA transcription (GO:0009299);; Biological Process: post-embryonic animal morphogenesis (GO:0009886);;	--	--	Protein G1-like2 OS=Oryza sativa subsp. japonica OX=39947 GN=G1L2 PE=1 SV=1	protein G1-like2 [Aegilops tauschii subsp. tauschii]
Triticum_aestivum_newGene_88815	--	--	Cellular Component: mitochondrion (GO:0005739);; Cellular Component: plastid (GO:0009536);; Molecular Function: metal ion binding (GO:0046872);;	--	--	Retrovirus-related Pol polyprotein from transposon RE1 OS=Arabidopsis thaliana OX=3702 GN=RE1 PE=2 SV=1	OSJNBb0026E15.10 [Oryza sativa Japonica Group]
Triticum_aestivum_newGene_70576	--	--	Cellular Component: nucleus (GO:0005634);; Cellular Component: cytosol (GO:0005829);; Cellular Component: phragmoplast (GO:0009524);; Cellular Component: plastid (GO:0009536);; Biological Process: embryo development ending in seed dormancy (GO:0009793);; Biological Process: cell division (GO:0051301);;	K17262|1.95993e-37|bdi:100839656|K17262 tubulin-folding cofactor B | (RefSeq) tubulin-folding cofactor B	--	Tubulin-folding cofactor B OS=Arabidopsis thaliana OX=3702 GN=TFCB PE=1 SV=1	tubulin-folding cofactor B [Aegilops tauschii subsp. tauschii]
TraesCS5A02G454700	[Q]	Secondary metabolites biosynthesis, transport and catabolism	Molecular Function: lactoylglutathione lyase activity (GO:0004462);; Molecular Function: protein serine/threonine kinase activity (GO:0004674);; Molecular Function: ATP binding (GO:0005524);; Cellular Component: nucleus (GO:0005634);; Cellular Component: mitochondrion (GO:0005739);; Biological Process: endocytosis (GO:0006897);; Biological Process: regulation of cell shape (GO:0008360);; Biologic…	K01759|0|bdi:100839008|K01759 lactoylglutathione lyase [EC:4.4.1.5] | (RefSeq) probable lactoylglutathione lyase, chloroplastic	Pyruvate metabolism (ko00620)	Probable lactoylglutathione lyase, chloroplastic OS=Arabidopsis thaliana OX=3702 GN=At1g67280 PE=1 SV=1	putative lactoylglutathione lyase, chloroplast [Triticum urartu]
TraesCS4D02G236800	[EH]	Amino acid transport and metabolism;; Coenzyme transport and metabolism	Biological Process: branched-chain amino acid metabolic process (GO:0009081);; Molecular Function: L-leucine transaminase activity (GO:0052654);; Molecular Function: L-valine transaminase activity (GO:0052655);; Molecular Function: L-isoleucine transaminase activity (GO:0052656);;	K00826|0|bdi:100839637|K00826 branched-chain amino acid aminotransferase [EC:2.6.1.42] | (RefSeq) branched-chain-amino-acid aminotransferase 3, chloroplastic	Cysteine and methionine metabolism (ko00270);; Valine, leucine and isoleucine degradation (ko00280);; Valine, leucine and isoleucine biosynthesis (ko00290);; Pantothenate and CoA biosynthesis (ko00770);; 2-Oxocarboxylic acid metabolism (ko01210);; Biosynthesis of amino acids (ko01230)	Branched-chain-amino-acid aminotransferase 3, chloroplastic OS=Arabidopsis thaliana OX=3702 GN=BCAT3 PE=1 SV=1	branched-chain-amino-acid aminotransferase 2, chloroplastic-like [Aegilops tauschii subsp. tauschii]
TraesCS7B02G084000	--	--	Cellular Component: cell wall (GO:0005618);; Molecular Function: manganese ion binding (GO:0030145);; Biological Process: oxalate metabolic process (GO:0033609);; Molecular Function: nutrient reservoir activity (GO:0045735);; Molecular Function: oxalate decarboxylase activity (GO:0046564);; Cellular Component: apoplast (GO:0048046);;	--	--	Germin-like protein 8-14 OS=Oryza sativa subsp. japonica OX=39947 GN=GER5 PE=1 SV=1	adenosine diphosphate glucose pyrophosphatase [Triticum aestivum]
Triticum_aestivum_newGene_64955	[T]	Signal transduction mechanisms	Molecular Function: protein serine/threonine kinase activity (GO:0004674);; Molecular Function: ATP binding (GO:0005524);; Biological Process: protein phosphorylation (GO:0006468);;	--	--	Serine/threonine-protein kinase PCRK1 OS=Arabidopsis thaliana OX=3702 GN=PCRK1 PE=1 SV=1	probable serine/threonine-protein kinase PBL19 [Aegilops tauschii subsp. tauschii]
TraesCS2B02G177300	[QV]	Secondary metabolites biosynthesis, transport and catabolism;; Defense mechanisms	Molecular Function: monooxygenase activity (GO:0004497);; Molecular Function: iron ion binding (GO:0005506);; Cellular Component: integral component of membrane (GO:0016021);; Molecular Function: oxidoreductase activity, acting on paired donors, with incorporation or reduction of molecular oxygen (GO:0016705);; Molecular Function: heme binding (GO:0020037);; Biological Process: oxidation-reductio…	K20660|0|bdi:100826419|K20660 cytochrome P450 family 709 | (RefSeq) cytochrome P450 734A6-like	--	Cytochrome P450 709B1 OS=Arabidopsis thaliana OX=3702 GN=CYP709B1 PE=2 SV=1	cytochrome P450 [Triticum aestivum]
TraesCS2B02G244100	[O]	Posttranslational modification, protein turnover, chaperones	Molecular Function: glutathione transferase activity (GO:0004364);; Cellular Component: cytoplasm (GO:0005737);; Biological Process: glutathione metabolic process (GO:0006749);; Biological Process: toxin catabolic process (GO:0009407);;	--	--	Probable glutathione S-transferase GSTU6 OS=Oryza sativa subsp. japonica OX=39947 GN=GSTU6 PE=2 SV=2	probable glutathione S-transferase GSTU6 [Aegilops tauschii subsp. tauschii]
TraesCS5B02G540700	[K]	Transcription	Molecular Function: protein serine/threonine kinase activity (GO:0004674);; Molecular Function: ATP binding (GO:0005524);; Biological Process: protein phosphorylation (GO:0006468);; Cellular Component: membrane (GO:0016020);;	--	--	LRR receptor-like serine/threonine-protein kinase FLS2 OS=Oryza sativa subsp. japonica OX=39947 GN=FLS2 PE=1 SV=1	LRR receptor-like serine/threonine-protein kinase FLS2 [Triticum urartu]
TraesCS2B02G458500	--	--	Cellular Component: endoplasmic reticulum membrane (GO:0005789);; Cellular Component: plasma membrane (GO:0005886);; Biological Process: response to abscisic acid (GO:0009737);; Molecular Function: abscisic acid binding (GO:0010427);; Cellular Component: integral component of membrane (GO:0016021);; Molecular Function: GTPase binding (GO:0051020);; Biological Process: cellular response to cold (G…	--	--	GPCR-type G protein COLD1 OS=Oryza sativa subsp. indica OX=39946 GN=COLD1 PE=3 SV=1	GPCR-type G protein COLD1 [Aegilops tauschii subsp. tauschii]
TraesCS5D02G148000	--	--	Molecular Function: transcription factor activity, sequence-specific DNA binding (GO:0003700);; Cellular Component: nucleus (GO:0005634);; Biological Process: regulation of transcription, DNA-templated (GO:0006355);; Biological Process: asymmetric cell division (GO:0008356);; Cellular Component: plastid (GO:0009536);; Biological Process: gravitropism (GO:0009630);; Biological Process: radial patt…	--	--	Protein SCARECROW 1 OS=Oryza sativa subsp. japonica OX=39947 GN=SCR1 PE=1 SV=1	protein SCARECROW 1-like [Aegilops tauschii subsp. tauschii]
TraesCS2D02G397700	--	--	Molecular Function: ubiquitin-protein transferase activity (GO:0004842);; Molecular Function: zinc ion binding (GO:0008270);; Biological Process: protein ubiquitination (GO:0016567);; Biological Process: negative regulation of organ growth (GO:0046621);;	--	--	F-box protein PP2-A13 OS=Arabidopsis thaliana OX=3702 GN=PP2A13 PE=1 SV=1	F-box protein PP2-A13-like [Aegilops tauschii subsp. tauschii]
Triticum_aestivum_newGene_31430	--	--	Molecular Function: binding (GO:0005488);; Cellular Component: mitochondrion (GO:0005739);; Cellular Component: plastid (GO:0009536);;	--	--	--	hypothetical protein TRIUR3_11313 [Triticum urartu]
TraesCS4A02G483900	[M]	Cell wall/membrane/envelope biogenesis	Molecular Function: protein kinase activity (GO:0004672);; Molecular Function: ATP binding (GO:0005524);; Biological Process: protein phosphorylation (GO:0006468);;	--	--	MDIS1-interacting receptor like kinase 1 OS=Arabidopsis thaliana OX=3702 GN=MIK1 PE=1 SV=1	Receptor-like protein kinase HAIKU2 [Triticum urartu]
TraesCS3B02G336100	[V]	Defense mechanisms	Biological Process: drug transmembrane transport (GO:0006855);; Molecular Function: drug transmembrane transporter activity (GO:0015238);; Molecular Function: antiporter activity (GO:0015297);; Cellular Component: integral component of membrane (GO:0016021);;	K03327|0|bdi:100834801|K03327 multidrug resistance protein, MATE family | (RefSeq) protein DETOXIFICATION 33-like	--	Protein DETOXIFICATION 33 OS=Arabidopsis thaliana OX=3702 GN=DTX33 PE=2 SV=1	unnamed protein product [Triticum aestivum]
TraesCS2B02G149600	[K]	Transcription	Molecular Function: transferase activity (GO:0016740);;	--	--	Probable LRR receptor-like serine/threonine-protein kinase At3g47570 OS=Arabidopsis thaliana OX=3702 GN=At3g47570 PE=2 SV=1	probable LRR receptor-like serine/threonine-protein kinase At3g47570 [Ananas comosus]
TraesCS2B02G231500	--	--	Cellular Component: integral component of membrane (GO:0016021);;	--	--	--	uncharacterized protein LOC109735990 [Aegilops tauschii subsp. tauschii]
TraesCS2B02G144900	[T]	Signal transduction mechanisms	Cellular Component: Golgi membrane (GO:0000139);; Biological Process: pollen germination (GO:0009846);; Cellular Component: integral component of membrane (GO:0016021);; Molecular Function: cellulose synthase (UDP-forming) activity (GO:0016760);; Biological Process: cellulose biosynthetic process (GO:0030244);; Biological Process: cell wall organization (GO:0071555);;	K20924|0|bdi:100833601|K20924 cellulose synthase-like protein [EC:2.4.1.-] | (RefSeq) cellulose synthase-like protein D3	--	Cellulose synthase-like protein D3 OS=Oryza sativa subsp. japonica OX=39947 GN=CSLD3 PE=2 SV=2	cellulose synthase-like protein D3 [Aegilops tauschii subsp. tauschii]
TraesCS5A02G004500	[QV]	Secondary metabolites biosynthesis, transport and catabolism;; Defense mechanisms	Molecular Function: iron ion binding (GO:0005506);; Cellular Component: endoplasmic reticulum (GO:0005783);; Cellular Component: plasma membrane (GO:0005886);; Molecular Function: methyltransferase activity (GO:0008168);; Molecular Function: sterol 14-demethylase activity (GO:0008398);; Cellular Component: integral component of membrane (GO:0016021);; Biological Process: sterol biosynthetic proce…	K05917|0|bdi:100844692|K05917 sterol 14-demethylase [EC:1.14.13.70] | (RefSeq) obtusifoliol 14-alpha demethylase-like	Steroid biosynthesis (ko00100)	Obtusifoliol 14-alpha demethylase OS=Sorghum bicolor OX=4558 GN=CYP51 PE=1 SV=1	obtusifoliol 14-alpha demethylase-like isoform X1 [Aegilops tauschii subsp. tauschii]
Triticum_aestivum_newGene_54841	[H]	Coenzyme transport and metabolism	Molecular Function: O-methyltransferase activity (GO:0008171);; Molecular Function: S-adenosylmethionine-dependent methyltransferase activity (GO:0008757);; Biological Process: aromatic compound biosynthetic process (GO:0019438);; Biological Process: methylation (GO:0032259);; Molecular Function: protein dimerization activity (GO:0046983);;	--	--	5-pentadecatrienyl resorcinol O-methyltransferase OS=Sorghum bicolor OX=4558 GN=OMT3 PE=1 SV=1	acetylserotonin O-methyltransferase 1-like [Aegilops tauschii subsp. tauschii]
TraesCS2B02G530000	[I]	Lipid transport and metabolism	Biological Process: lipid metabolic process (GO:0006629);; Cellular Component: integral component of membrane (GO:0016021);; Molecular Function: hydrolase activity (GO:0016787);;	--	--	--	uncharacterized protein LOC109777994 [Aegilops tauschii subsp. tauschii]
TraesCS3D02G373700	--	--	Molecular Function: magnesium ion transmembrane transporter activity (GO:0015095);; Biological Process: magnesium ion transport (GO:0015693);; Cellular Component: integral component of membrane (GO:0016021);; Biological Process: magnesium ion transmembrane transport (GO:1903830);;	--	--	Magnesium transporter MRS2-E OS=Oryza sativa subsp. japonica OX=39947 GN=MRS2-E PE=2 SV=1	magnesium transporter MRS2-E-like [Aegilops tauschii subsp. tauschii]
TraesCS1B02G455100	[V]	Defense mechanisms	Cellular Component: integral component of membrane (GO:0016021);; Biological Process: transmembrane transport (GO:0055085);;	--	--	S-type anion channel SLAH2 OS=Arabidopsis thaliana OX=3702 GN=SLAH2 PE=2 SV=1	S-type anion channel SLAH2-like [Aegilops tauschii subsp. tauschii]
TraesCS5B02G025300	[T]	Signal transduction mechanisms	Molecular Function: protein kinase activity (GO:0004672);; Molecular Function: ATP binding (GO:0005524);; Cellular Component: plasma membrane (GO:0005886);; Biological Process: protein phosphorylation (GO:0006468);; Cellular Component: integral component of membrane (GO:0016021);;	--	--	Probable inactive receptor kinase At2g26730 OS=Arabidopsis thaliana OX=3702 GN=At2g26730 PE=1 SV=1	probable inactive receptor kinase At2g26730 [Aegilops tauschii subsp. tauschii]
TraesCS5A02G220900	--	--	Molecular Function: transcription factor activity, sequence-specific DNA binding (GO:0003700);; Cellular Component: nucleus (GO:0005634);; Biological Process: regulation of transcription, DNA-templated (GO:0006355);; Molecular Function: sequence-specific DNA binding (GO:0043565);;	--	--	NAC domain-containing protein 82 OS=Arabidopsis thaliana OX=3702 GN=NAC082 PE=1 SV=1	NAC domain-containing protein 78 [Triticum urartu]
TraesCS2B02G192800	[T]	Signal transduction mechanisms	Molecular Function: metal ion binding (GO:0046872);;	--	--	Phytochrome-interacting ankyrin-repeat protein 1 OS=Arabidopsis thaliana OX=3702 GN=PIA1 PE=2 SV=1	vacuolar protein sorting-associated protein 27 isoform X1 [Aegilops tauschii subsp. tauschii]
Triticum_aestivum_newGene_81790	--	--	--	--	--	--	unnamed protein product [Triticum aestivum]
TraesCS7A02G015900	[G]	Carbohydrate transport and metabolism	Biological Process: flavonoid biosynthetic process (GO:0009813);; Cellular Component: intracellular membrane-bounded organelle (GO:0043231);; Biological Process: flavonoid glucuronidation (GO:0052696);; Molecular Function: quercetin 3-O-glucosyltransferase activity (GO:0080043);; Molecular Function: quercetin 7-O-glucosyltransferase activity (GO:0080044);;	--	--	UDP-glycosyltransferase 86A1 OS=Arabidopsis thaliana OX=3702 GN=UGT86A1 PE=2 SV=1	UDP-glycosyltransferase 86A1-like [Aegilops tauschii subsp. tauschii]
TraesCS2B02G433900	[E]	Amino acid transport and metabolism	Molecular Function: acetylglutamate kinase activity (GO:0003991);; Molecular Function: acetyl-CoA:L-glutamate N-acetyltransferase activity (GO:0004042);; Biological Process: arginine biosynthetic process (GO:0006526);; Biological Process: proline biosynthetic process (GO:0006561);; Cellular Component: plastid (GO:0009536);; Biological Process: phosphorylation (GO:0016310);; Molecular Function: ar…	K00930|0|bdi:100834272|K00930 acetylglutamate kinase [EC:2.7.2.8] | (RefSeq) acetylglutamate kinase-like	Arginine biosynthesis (ko00220);; 2-Oxocarboxylic acid metabolism (ko01210);; Biosynthesis of amino acids (ko01230)	Acetylglutamate kinase, chloroplastic OS=Arabidopsis thaliana OX=3702 GN=NAGK PE=1 SV=1	uncharacterized protein LOC109750037 [Aegilops tauschii subsp. tauschii]
Triticum_aestivum_newGene_8373	--	--	Cellular Component: mitochondrion (GO:0005739);; Cellular Component: chloroplast thylakoid membrane (GO:0009535);; Cellular Component: integral component of membrane (GO:0016021);;	--	--	--	hypothetical protein TRIUR3_11550 [Triticum urartu]
TraesCS3B02G515100	--	--	Molecular Function: aspartic-type endopeptidase activity (GO:0004190);; Biological Process: proteolysis (GO:0006508);; Molecular Function: hydrolase activity, acting on glycosyl bonds (GO:0016798);; Biological Process: xylan catabolic process (GO:0045493);;	--	--	Basic 7S globulin 2 OS=Glycine max OX=3847 PE=1 SV=1	xylanase inhibitor precursor, partial [Triticum aestivum]
Triticum_aestivum_newGene_30982	--	--	Biological Process: metabolic process (GO:0008152);; Molecular Function: transferase activity, transferring hexosyl groups (GO:0016758);;	--	--	--	glutathione S-transferase T2-like [Aegilops tauschii subsp. tauschii]
Triticum_aestivum_newGene_45381	--	--	Biological Process: amino acid transmembrane transport (GO:0003333);; Molecular Function: DNA binding (GO:0003677);; Molecular Function: chromatin binding (GO:0003682);; Molecular Function: RNA binding (GO:0003723);; Molecular Function: RNA-directed DNA polymerase activity (GO:0003964);; Molecular Function: aspartic-type endopeptidase activity (GO:0004190);; Biological Process: RNA-dependent DNA …	--	--	Uncharacterized mitochondrial protein AtMg00860 OS=Arabidopsis thaliana OX=3702 GN=AtMg00860 PE=4 SV=1	uncharacterized protein LOC109940263 [Zea mays]
TraesCS6D02G191500	[J]	Translation, ribosomal structure and biogenesis	Molecular Function: protein serine/threonine kinase activity (GO:0004674);; Molecular Function: ATP binding (GO:0005524);; Cellular Component: mitochondrion (GO:0005739);; Biological Process: protein phosphorylation (GO:0006468);; Cellular Component: integral component of membrane (GO:0016021);; Molecular Function: carbohydrate binding (GO:0030246);;	--	--	L-type lectin-domain containing receptor kinase IV.2 OS=Arabidopsis thaliana OX=3702 GN=LECRK42 PE=2 SV=1	L-type lectin-domain containing receptor kinase IV.1-like [Aegilops tauschii subsp. tauschii]
Triticum_aestivum_newGene_74947	--	--	--	--	--	Protein FAR1-RELATED SEQUENCE 5 OS=Arabidopsis thaliana OX=3702 GN=FRS5 PE=1 SV=1	protein FAR1-RELATED SEQUENCE 5-like [Aegilops tauschii subsp. tauschii]
TraesCS1A02G176700	--	--	Molecular Function: DNA binding (GO:0003677);;	--	--	Trihelix transcription factor GT-2 OS=Arabidopsis thaliana OX=3702 GN=GT-2 PE=2 SV=1	trihelix transcription factor GTL1-like isoform X1 [Aegilops tauschii subsp. tauschii]
Triticum_aestivum_newGene_25325	--	--	--	--	--	PLAT domain-containing protein 1 OS=Arabidopsis thaliana OX=3702 GN=PLAT1 PE=1 SV=1	PLAT domain-containing protein 3-like [Aegilops tauschii subsp. tauschii]
TraesCS7A02G532900	[U]	Intracellular trafficking, secretion, and vesicular transport	Molecular Function: protein kinase activity (GO:0004672);; Molecular Function: ATP binding (GO:0005524);; Biological Process: protein phosphorylation (GO:0006468);;	--	--	U-box domain-containing protein 33 OS=Arabidopsis thaliana OX=3702 GN=PUB33 PE=2 SV=2	U-box domain-containing protein 33-like [Aegilops tauschii subsp. tauschii]
TraesCS4D02G359900	--	--	--	--	--	Lipid transfer protein EARLI 1 OS=Arabidopsis thaliana OX=3702 GN=EARLI1 PE=1 SV=1	glycine-rich protein 5-like [Aegilops tauschii subsp. tauschii]
Triticum_aestivum_newGene_6915	--	--	--	--	--	--	uncharacterized protein LOC109786279 [Aegilops tauschii subsp. tauschii]
Triticum_aestivum_newGene_89614	[X]	Mobilome: prophages, transposons	Cellular Component: mitochondrion (GO:0005739);; Biological Process: DNA metabolic process (GO:0006259);; Cellular Component: plastid (GO:0009536);; Molecular Function: metal ion binding (GO:0046872);;	--	--	Retrovirus-related Pol polyprotein from transposon TNT 1-94 OS=Nicotiana tabacum OX=4097 PE=2 SV=1	OSJNBb0034I13.10 [Oryza sativa Japonica Group]
TraesCS3A02G257500	[V]	Defense mechanisms	Molecular Function: ATP binding (GO:0005524);; Cellular Component: integral component of membrane (GO:0016021);; Molecular Function: ATPase activity, coupled to transmembrane movement of substances (GO:0042626);; Biological Process: transmembrane transport (GO:0055085);;	K05658|0|bdi:100842644|K05658 ATP-binding cassette, subfamily B (MDR/TAP), member 1 [EC:3.6.3.44] | (RefSeq) ABC transporter B family member 4-like	ABC transporters (ko02010)	ABC transporter B family member 4 OS=Arabidopsis thaliana OX=3702 GN=ABCB4 PE=1 SV=1	ABC transporter B family member 4-like [Aegilops tauschii subsp. tauschii]
TraesCS4D02G242200	[Q]	Secondary metabolites biosynthesis, transport and catabolism	Biological Process: fatty acid biosynthetic process (GO:0006633);; Cellular Component: integral component of membrane (GO:0016021);; Molecular Function: transferase activity, transferring acyl groups other than amino-acyl groups (GO:0016747);;	K15397|0|bdi:100826902|K15397 3-ketoacyl-CoA synthase [EC:2.3.1.199] | (RefSeq) 3-ketoacyl-CoA synthase 6-like	Fatty acid elongation (ko00062)	3-ketoacyl-CoA synthase 6 OS=Arabidopsis thaliana OX=3702 GN=CUT1 PE=1 SV=1	3-ketoacyl-CoA synthase 6-like [Aegilops tauschii subsp. tauschii]
TraesCS5D02G189500	[G]	Carbohydrate transport and metabolism	Biological Process: carbohydrate metabolic process (GO:0005975);; Cellular Component: chloroplast stroma (GO:0009570);; Molecular Function: isomerase activity (GO:0016853);; Molecular Function: carbohydrate binding (GO:0030246);; Cellular Component: apoplast (GO:0048046);;	K01792|0|bdi:100824234|K01792 glucose-6-phosphate 1-epimerase [EC:5.1.3.15] | (RefSeq) putative glucose-6-phosphate 1-epimerase	Glycolysis / Gluconeogenesis (ko00010)	Putative glucose-6-phosphate 1-epimerase OS=Cenchrus ciliaris OX=35872 PE=2 SV=1	putative glucose-6-phosphate 1-epimerase [Aegilops tauschii subsp. tauschii]
Triticum_aestivum_newGene_42697	--	--	--	--	--	--	basic proline-rich protein-like [Aegilops tauschii subsp. tauschii]
TraesCS6B02G140500	--	--	--	--	--	F-box/FBD/LRR-repeat protein At1g13570 OS=Arabidopsis thaliana OX=3702 GN=At1g13570 PE=2 SV=1	F-box/FBD/LRR-repeat protein At1g13570-like [Aegilops tauschii subsp. tauschii]
Triticum_aestivum_newGene_4318	--	--	--	--	--	--	uncharacterized protein LOC109782855 [Aegilops tauschii subsp. tauschii]
TraesCS2B02G242600	--		Molecular Function: protein serine/threonine kinase activity (GO:0004674);; Molecular Function: ATP binding (GO:0005524);; Cellular Component: plasma membrane (GO:0005886);; Biological Process: protein phosphorylation (GO:0006468);; Biological Process: defense response (GO:0006952);; Cellular Component: plasmodesma (GO:0009506);; Cellular Component: integral component of membrane (GO:0016021);;	--	--	Cysteine-rich receptor-like protein kinase 25 OS=Arabidopsis thaliana OX=3702 GN=CRK25 PE=3 SV=1	cysteine-rich receptor-like protein kinase 10 isoform X2 [Aegilops tauschii subsp. tauschii]
TraesCS3D02G321800	--	--	Molecular Function: protein serine/threonine kinase activity (GO:0004674);; Cellular Component: cytosol (GO:0005829);; Biological Process: sucrose metabolic process (GO:0005985);; Biological Process: protein phosphorylation (GO:0006468);; Molecular Function: sucrose synthase activity (GO:0016157);; Biological Process: intracellular signal transduction (GO:0035556);;	--	--	Protein RICE SALT SENSITIVE 3 OS=Oryza sativa subsp. japonica OX=39947 GN=RSS3 PE=1 SV=1	uncharacterized protein LOC109757922 [Aegilops tauschii subsp. tauschii]
Triticum_aestivum_newGene_67593	--	--	Molecular Function: microtubule motor activity (GO:0003777);; Molecular Function: ATP binding (GO:0005524);; Biological Process: microtubule-based movement (GO:0007018);; Molecular Function: microtubule binding (GO:0008017);;	K10406|0|bdi:100824880|K10406 kinesin family member C2/C3 | (RefSeq) kinesin-like protein KIF18B	--	Kinesin-like protein KIN-14E OS=Oryza sativa subsp. japonica OX=39947 GN=KIN14E PE=2 SV=1	kinesin-like protein KIN-14E isoform X3 [Aegilops tauschii subsp. tauschii]
Triticum_aestivum_newGene_46829	--	--	--	--	--	--	60S ribosomal protein L10a-3 [Triticum urartu]
TraesCS6B02G459146	[T]	Signal transduction mechanisms	Molecular Function: protein serine/threonine kinase activity (GO:0004674);; Molecular Function: calcium ion binding (GO:0005509);; Molecular Function: ATP binding (GO:0005524);; Cellular Component: mitochondrion (GO:0005739);; Cellular Component: plasma membrane (GO:0005886);; Biological Process: protein phosphorylation (GO:0006468);; Biological Process: cell surface receptor signaling pathway (G…	--	--	Wall-associated receptor kinase 5 OS=Arabidopsis thaliana OX=3702 GN=WAK5 PE=2 SV=1	Wall-associated receptor kinase 5 [Triticum urartu]
TraesCS2A02G468500	--	--	Molecular Function: catechol oxidase activity (GO:0004097);; Molecular Function: monophenol monooxygenase activity (GO:0004503);; Biological Process: pigment biosynthetic process (GO:0046148);; Molecular Function: metal ion binding (GO:0046872);; Biological Process: oxidation-reduction process (GO:0055114);;	K00422|0|zma:103641967|K00422 polyphenol oxidase [EC:1.10.3.1] | (RefSeq) polyphenol oxidase, chloroplastic-like	Tyrosine metabolism (ko00350);; Isoquinoline alkaloid biosynthesis (ko00950)	Polyphenol oxidase, chloroplastic OS=Malus domestica OX=3750 PE=2 SV=1	polyphenol oxidase [Triticum aestivum]
TraesCS6A02G407000	--	--	Molecular Function: methyltransferase activity (GO:0008168);; Cellular Component: integral component of membrane (GO:0016021);; Biological Process: methylation (GO:0032259);;	--	--	F-box protein At1g80960 OS=Arabidopsis thaliana OX=3702 GN=At1g80960 PE=2 SV=3	predicted protein [Hordeum vulgare subsp. vulgare]
TraesCS2B02G625400	[K]	Transcription	Molecular Function: ADP binding (GO:0043531);;	--	--	Disease resistance protein RPM1 OS=Arabidopsis thaliana OX=3702 GN=RPM1 PE=1 SV=1	Disease resistance protein RPM1 [Triticum urartu]
Triticum_aestivum_newGene_30717	[L]	Replication, recombination and repair	Biological Process: telomere maintenance (GO:0000723);; Molecular Function: DNA helicase activity (GO:0003678);; Biological Process: DNA repair (GO:0006281);; Biological Process: DNA duplex unwinding (GO:0032508);;	--	--	--	uncharacterized protein LOC109735479 [Aegilops tauschii subsp. tauschii]
Triticum_aestivum_newGene_34091	--	--	--	--	--	--	uncharacterized protein LOC109749713 isoform X1 [Aegilops tauschii subsp. tauschii]
TraesCS3B02G514800	--	--	Molecular Function: aspartic-type endopeptidase activity (GO:0004190);; Biological Process: proteolysis (GO:0006508);; Molecular Function: hydrolase activity, acting on glycosyl bonds (GO:0016798);; Biological Process: xylan catabolic process (GO:0045493);;	--	--	--	xylanase inhibitor [Triticum aestivum]
Triticum_aestivum_newGene_99625	--	--	--	--	--	--	hypothetical protein TRIUR3_27912 [Triticum urartu]
TraesCS2A02G467700	[CIR]	Energy production and conversion;; Lipid transport and metabolism;; General function prediction only	Cellular Component: peroxisome (GO:0005777);; Molecular Function: glycolate oxidase activity (GO:0008891);; Biological Process: oxidative photosynthetic carbon pathway (GO:0009854);; Biological Process: regulation of photosynthesis (GO:0010109);; Molecular Function: FMN binding (GO:0010181);; Biological Process: modulation by virus of host morphology or physiology (GO:0019048);; Molecular Functio…	K11517|0|bdi:100824351|K11517 (S)-2-hydroxy-acid oxidase [EC:1.1.3.15] | (RefSeq) peroxisomal (S)-2-hydroxy-acid oxidase GLO3	Glyoxylate and dicarboxylate metabolism (ko00630);; Carbon metabolism (ko01200);; Peroxisome (ko04146)	Peroxisomal (S)-2-hydroxy-acid oxidase GLO3 OS=Oryza sativa subsp. japonica OX=39947 GN=GLO3 PE=2 SV=1	peroxisomal (S)-2-hydroxy-acid oxidase GLO3 [Aegilops tauschii subsp. tauschii]
Triticum_aestivum_newGene_70077	--	--	--	--	--	--	uncharacterized protein LOC109781667 [Aegilops tauschii subsp. tauschii]
TraesCS5D02G353600	[R]	General function prediction only	Cellular Component: nucleus (GO:0005634);; Cellular Component: cytosol (GO:0005829);; Biological Process: cytokinin biosynthetic process (GO:0009691);; Molecular Function: hydrolase activity, hydrolyzing N-glycosyl compounds (GO:0016799);;	K06966|1.90579e-136|bdi:100824325|K06966 uncharacterized protein | (RefSeq) probable cytokinin riboside 5'-monophosphate phosphoribohydrolase LOGL9	--	Probable cytokinin riboside 5&apos;-monophosphate phosphoribohydrolase LOGL9 OS=Oryza sativa subsp. japonica OX=39947 GN=LOGL9 PE=2 SV=1	probable cytokinin riboside 5&apos;-monophosphate phosphoribohydrolase LOGL9 [Aegilops tauschii subsp. tauschii]
TraesCS5B02G312000	--	--	Molecular Function: DNA binding (GO:0003677);; Molecular Function: transcription factor activity, sequence-specific DNA binding (GO:0003700);; Cellular Component: nucleus (GO:0005634);; Biological Process: regulation of transcription, DNA-templated (GO:0006355);;	--	--	Dehydration-responsive element-binding protein 1B OS=Oryza sativa subsp. japonica OX=39947 GN=DREB1B PE=2 SV=1	C repeat-binding factor 2 [Triticum aestivum]
Triticum_aestivum_newGene_32496	--	--	--	K06442|8.30215e-23|bdi:100844113|K06442 23S rRNA (cytidine1920-2'-O)/16S rRNA (cytidine1409-2'-O)-methyltransferase [EC:2.1.1.226 2.1.1.227] | (RefSeq) hemolysin A	--	--	uncharacterized protein LOC109766524 [Aegilops tauschii subsp. tauschii]
TraesCS7B02G103800	[C]	Energy production and conversion	Molecular Function: phosphogluconate dehydrogenase (decarboxylating) activity (GO:0004616);; Molecular Function: pyruvate dehydrogenase (acetyl-transferring) activity (GO:0004739);; Cellular Component: mitochondrial matrix (GO:0005759);; Biological Process: acetyl-CoA biosynthetic process from pyruvate (GO:0006086);; Biological Process: glycolytic process (GO:0006096);; Biological Process: pentos…	K00161|0|bdi:100821082|K00161 pyruvate dehydrogenase E1 component alpha subunit [EC:1.2.4.1] | (RefSeq) pyruvate dehydrogenase E1 component subunit alpha-2, mitochondrial	Glycolysis / Gluconeogenesis (ko00010);; Citrate cycle (TCA cycle) (ko00020);; Pyruvate metabolism (ko00620);; Carbon metabolism (ko01200)	Pyruvate dehydrogenase E1 component subunit alpha-2, mitochondrial OS=Oryza sativa subsp. japonica OX=39947 GN=Os06g0246500 PE=2 SV=1	pyruvate dehydrogenase E1 component subunit alpha-2, mitochondrial [Aegilops tauschii subsp. tauschii]
Triticum_aestivum_newGene_22164	--	--	Cellular Component: integral component of membrane (GO:0016021);;	--	--	Bax inhibitor 1 OS=Oryza sativa subsp. japonica OX=39947 GN=BI1 PE=2 SV=1	hypothetical protein TRIUR3_31418 [Triticum urartu]
Triticum_aestivum_newGene_93242	--	--	Biological Process: developmental process (GO:0032502);;	--	--	--	uncharacterized protein LOC109785915 [Aegilops tauschii subsp. tauschii]
TraesCS3D02G358800	[G]	Carbohydrate transport and metabolism	Cellular Component: nucleus (GO:0005634);; Biological Process: chloroplast organization (GO:0009658);; Molecular Function: kinase activity (GO:0016301);; Biological Process: phosphorylation (GO:0016310);; Molecular Function: phosphotransferase activity, alcohol group as acceptor (GO:0016773);; Cellular Component: chloroplast nucleoid (GO:0042644);; Biological Process: transcription from plastid p…	--	--	Fructokinase-like 1, chloroplastic OS=Arabidopsis thaliana OX=3702 GN=FLN1 PE=1 SV=1	fructokinase-like 1, chloroplastic [Aegilops tauschii subsp. tauschii]
TraesCS7B02G168100	[O]	Posttranslational modification, protein turnover, chaperones	Molecular Function: serine-type endopeptidase activity (GO:0004252);; Cellular Component: integral component of membrane (GO:0016021);; Biological Process: protein processing (GO:0016485);;	--	--	RHOMBOID-like protein 2 OS=Arabidopsis thaliana OX=3702 GN=RBL2 PE=1 SV=1	predicted protein [Hordeum vulgare subsp. vulgare]
Triticum_aestivum_newGene_48343	--	--	Biological Process: proteolysis (GO:0006508);; Molecular Function: cysteine-type peptidase activity (GO:0008234);; Cellular Component: plastid (GO:0009536);;	K14497|7.43078e-13|egu:105053585|K14497 protein phosphatase 2C [EC:3.1.3.16] | (RefSeq) probable protein phosphatase 2C 75	Plant hormone signal transduction (ko04075)	Probable protein phosphatase 2C 37 OS=Oryza sativa subsp. japonica OX=39947 GN=Os04g0167900 PE=3 SV=2	uncharacterized protein LOC109776804 isoform X2 [Aegilops tauschii subsp. tauschii]
Triticum_aestivum_newGene_76687	--	--	Cellular Component: autophagosome membrane (GO:0000421);; Cellular Component: microtubule (GO:0005874);; Biological Process: autophagy (GO:0006914);; Biological Process: cellular response to nitrogen starvation (GO:0006995);; Biological Process: protein transport (GO:0015031);; Cellular Component: Cvt vesicle membrane (GO:0033110);;	K08341|1.6911e-66|osa:4337052|K08341 GABA(A) receptor-associated protein | (RefSeq) APG8B, ATG8B, OsJ_015525; autophagy-related protein 8B	Regulation of autophagy (ko04140)	Autophagy-related protein 8B OS=Oryza sativa subsp. japonica OX=39947 GN=ATG8B PE=3 SV=2	autophagy-related protein 8C [Aegilops tauschii subsp. tauschii]
TraesCS2B02G216300	--	--	Cellular Component: nucleus (GO:0005634);; Cellular Component: plastid (GO:0009536);;	--	--	U-box domain-containing protein 4 OS=Arabidopsis thaliana OX=3702 GN=PUB4 PE=1 SV=3	predicted protein [Hordeum vulgare subsp. vulgare]
TraesCS5D02G099700	--	--	Biological Process: cutin biosynthetic process (GO:0010143);; Cellular Component: integral component of membrane (GO:0016021);; Biological Process: dephosphorylation (GO:0016311);; Molecular Function: phosphatase activity (GO:0016791);; Molecular Function: glycerol-3-phosphate 2-O-acyltransferase activity (GO:0090447);;	--	--	Probable glycerol-3-phosphate acyltransferase 3 OS=Arabidopsis thaliana OX=3702 GN=GPAT3 PE=2 SV=1	probable glycerol-3-phosphate acyltransferase 3 [Aegilops tauschii subsp. tauschii]
TraesCS5D02G082200	--	--	--	--	--	Putative lipid-transfer protein DIR1 OS=Arabidopsis thaliana OX=3702 GN=DIR1 PE=1 SV=1	Putative lipid-transfer protein DIR1 [Triticum urartu]
TraesCS1B02G225700	--	--	Cellular Component: extracellular region (GO:0005576);; Cellular Component: cell wall (GO:0005618);; Cellular Component: membrane (GO:0016020);; Biological Process: sexual reproduction (GO:0019953);; Biological Process: cell wall organization (GO:0071555);;	--	--	Expansin-B6 OS=Oryza sativa subsp. japonica OX=39947 GN=EXPB6 PE=2 SV=1	expansin-B6-like [Aegilops tauschii subsp. tauschii]
TraesCS2B02G418300	--	--	Molecular Function: zinc ion binding (GO:0008270);; Cellular Component: plastid (GO:0009536);; Biological Process: protein ubiquitination (GO:0016567);; Molecular Function: ligase activity (GO:0016874);; Biological Process: proteasome-mediated ubiquitin-dependent protein catabolic process (GO:0043161);; Biological Process: negative regulation of organ growth (GO:0046621);; Biological Process: flo…	K19045|1.06463e-129|bdi:100831396|K19045 E3 ubiquitin-protein ligase BIG BROTHER and related proteins [EC:2.3.2.27] | (RefSeq) E3 ubiquitin ligase BIG BROTHER-related-like	--	E3 ubiquitin ligase BIG BROTHER OS=Arabidopsis thaliana OX=3702 GN=BB PE=1 SV=1	E3 ubiquitin ligase BIG BROTHER-related-like isoform X2 [Aegilops tauschii subsp. tauschii]
TraesCS2D02G246100	[J]	Translation, ribosomal structure and biogenesis	Molecular Function: 3'-5'-exoribonuclease activity (GO:0000175);; Molecular Function: RNA binding (GO:0003723);; Molecular Function: polyribonucleotide nucleotidyltransferase activity (GO:0004654);; Biological Process: rRNA processing (GO:0006364);; Biological Process: mRNA processing (GO:0006397);; Biological Process: mRNA catabolic process (GO:0006402);; Biological Process: tRNA processing (GO:…	K00962|0|bdi:100824934|K00962 polyribonucleotide nucleotidyltransferase [EC:2.7.7.8] | (RefSeq) probable polyribonucleotide nucleotidyltransferase 1, chloroplastic	Purine metabolism (ko00230);; Pyrimidine metabolism (ko00240);; RNA degradation (ko03018)	Probable polyribonucleotide nucleotidyltransferase 1, chloroplastic OS=Oryza sativa subsp. japonica OX=39947 GN=PNP1 PE=2 SV=1	probable polyribonucleotide nucleotidyltransferase 1, chloroplastic [Aegilops tauschii subsp. tauschii]
TraesCS7D02G405900	--	--	Biological Process: flavonoid biosynthetic process (GO:0009813);; Cellular Component: intracellular membrane-bounded organelle (GO:0043231);; Biological Process: flavonoid glucuronidation (GO:0052696);; Molecular Function: quercetin 3-O-glucosyltransferase activity (GO:0080043);; Molecular Function: quercetin 7-O-glucosyltransferase activity (GO:0080044);;	--	--	7-deoxyloganetic acid glucosyltransferase OS=Catharanthus roseus OX=4058 GN=UGT709C2 PE=1 SV=1	7-deoxyloganetic acid glucosyltransferase-like [Aegilops tauschii subsp. tauschii]
TraesCS4A02G366000	[HR]	Coenzyme transport and metabolism;; General function prediction only	Molecular Function: hydrolase activity (GO:0016787);;	--	--	Proline iminopeptidase OS=Arabidopsis thaliana OX=3702 GN=PIP PE=2 SV=3	uncharacterized protein LOC109775380 [Aegilops tauschii subsp. tauschii]
TraesCS3A02G280600	--	--	Cellular Component: endosome (GO:0005768);; Cellular Component: trans-Golgi network (GO:0005802);;	--	--	BURP domain-containing protein 3 OS=Oryza sativa subsp. japonica OX=39947 GN=BURP3 PE=2 SV=1	BURP domain-containing protein 3 [Aegilops tauschii subsp. tauschii]
TraesCS2B02G185100	[H]	Coenzyme transport and metabolism	Cellular Component: mitochondrion (GO:0005739);; Cellular Component: chloroplast envelope (GO:0009941);; Molecular Function: oxidoreductase activity (GO:0016491);; Biological Process: oxidation-reduction process (GO:0055114);;	--	--	--	uncharacterized protein LOC109761076 [Aegilops tauschii subsp. tauschii]
TraesCS2B02G445200	--	--	Molecular Function: magnesium ion binding (GO:0000287);; Biological Process: metabolic process (GO:0008152);; Molecular Function: terpene synthase activity (GO:0010333);;	K04121|0|bdi:100827748|K04121 ent-kaurene synthase [EC:4.2.3.19] | (RefSeq) ent-kaur-16-ene synthase, chloroplastic-like	Diterpenoid biosynthesis (ko00904)	Ent-kaur-16-ene synthase, chloroplastic OS=Oryza sativa subsp. japonica OX=39947 GN=KS1 PE=1 SV=1	ent-kaurene synthase like 2 [Triticum aestivum]
Triticum_aestivum_newGene_67192	--	--	Molecular Function: structural constituent of ribosome (GO:0003735);; Molecular Function: N-acetyl-gamma-glutamyl-phosphate reductase activity (GO:0003942);; Molecular Function: aspartate-semialdehyde dehydrogenase activity (GO:0004073);; Cellular Component: nucleus (GO:0005634);; Cellular Component: ribosome (GO:0005840);; Biological Process: translation (GO:0006412);; Molecular Function: zinc i…	--	--	--	Nuclear pore complex protein NUP205 [Zea mays]
TraesCS1B02G356600	--	--	Cellular Component: nucleus (GO:0005634);; Biological Process: regulation of transcription, DNA-templated (GO:0006355);; Biological Process: regulation of translation (GO:0006417);; Biological Process: auxin-activated signaling pathway (GO:0009734);; Molecular Function: protein dimerization activity (GO:0046983);;	K14484|3.20957e-101|osa:4339365|K14484 auxin-responsive protein IAA | (RefSeq) IAA18; auxin-responsive protein IAA18	Plant hormone signal transduction (ko04075)	Auxin-responsive protein IAA18 OS=Oryza sativa subsp. japonica OX=39947 GN=IAA18 PE=2 SV=1	auxin-responsive protein IAA18-like isoform X1 [Aegilops tauschii subsp. tauschii]
TraesCS7D02G417100	--	--	--	--	--	Protein ENHANCED DISEASE RESISTANCE 2-like OS=Arabidopsis thaliana OX=3702 GN=EDR2L PE=2 SV=1	protein ENHANCED DISEASE RESISTANCE 2-like isoform X2 [Aegilops tauschii subsp. tauschii]
Triticum_aestivum_newGene_71998	--	--	Molecular Function: catalytic activity (GO:0003824);; Cellular Component: membrane (GO:0016020);; Cellular Component: intracellular membrane-bounded organelle (GO:0043231);; Cellular Component: cytoplasmic part (GO:0044444);;	--	--	--	3beta-hydroxysteroid-dehydrogenase/decarboxylase-like [Aegilops tauschii subsp. tauschii]
TraesCS2D02G547700	[QV]	Secondary metabolites biosynthesis, transport and catabolism;; Defense mechanisms	Molecular Function: iron ion binding (GO:0005506);; Cellular Component: integral component of membrane (GO:0016021);; Molecular Function: oxidoreductase activity, acting on paired donors, with incorporation or reduction of molecular oxygen, NAD(P)H as one donor, and incorporation of one atom of oxygen (GO:0016709);; Molecular Function: heme binding (GO:0020037);; Biological Process: secondary met…	--	--	Geraniol 8-hydroxylase OS=Catharanthus roseus OX=4058 GN=CYP76B6 PE=1 SV=1	predicted protein [Hordeum vulgare subsp. vulgare]
TraesCS4B02G306500	--	--	--	--	--	--	uncharacterized protein LOC109765314 [Aegilops tauschii subsp. tauschii]
TraesCS5D02G321100	[M]	Cell wall/membrane/envelope biogenesis	Molecular Function: UDP-glucose 4-epimerase activity (GO:0003978);; Biological Process: galactose metabolic process (GO:0006012);; Biological Process: UDP-L-arabinose biosynthetic process (GO:0033358);; Biological Process: capsule polysaccharide biosynthetic process (GO:0045227);; Molecular Function: UDP-arabinose 4-epimerase activity (GO:0050373);; Biological Process: cell wall organization (GO:…	K01784|0|bdi:100844125|K01784 UDP-glucose 4-epimerase [EC:5.1.3.2] | (RefSeq) UDP-glucose 4-epimerase 3-like	Galactose metabolism (ko00052);; Amino sugar and nucleotide sugar metabolism (ko00520)	UDP-glucose 4-epimerase 3 OS=Oryza sativa subsp. japonica OX=39947 GN=UGE-3 PE=2 SV=1	UDP-glucose 4-epimerase 3-like [Aegilops tauschii subsp. tauschii]
TraesCS2A02G368700	[K]	Transcription	Molecular Function: protein kinase activity (GO:0004672);; Molecular Function: ATP binding (GO:0005524);; Biological Process: protein phosphorylation (GO:0006468);; Cellular Component: integral component of membrane (GO:0016021);;	--	--	Probable LRR receptor-like serine/threonine-protein kinase At1g63430 OS=Arabidopsis thaliana OX=3702 GN=At1g63430 PE=2 SV=1	probable LRR receptor-like serine/threonine-protein kinase At1g63430 [Aegilops tauschii subsp. tauschii]
TraesCS3B02G164000	[S]	Function unknown	Cellular Component: mitochondrion (GO:0005739);;	--	--	--	unnamed protein product [Triticum aestivum]
TraesCS2A02G199600	[K]	Transcription	Molecular Function: enzyme inhibitor activity (GO:0004857);; Biological Process: cell differentiation (GO:0030154);; Biological Process: negative regulation of catalytic activity (GO:0043086);; Biological Process: specification of floral organ number (GO:0048833);;	--	--	Polygalacturonase inhibitor 1 OS=Oryza sativa subsp. japonica OX=39947 GN=FOR1 PE=2 SV=1	polygalacturonase inhibitor 1-like [Aegilops tauschii subsp. tauschii]
TraesCS2D02G462000	[K]	Transcription	Molecular Function: protein kinase activity (GO:0004672);; Molecular Function: ATP binding (GO:0005524);; Cellular Component: endosome (GO:0005768);; Cellular Component: plasma membrane (GO:0005886);; Biological Process: protein phosphorylation (GO:0006468);; Biological Process: receptor-mediated endocytosis (GO:0006898);; Biological Process: regulation of anion channel activity (GO:0010359);; Ce…	K13420|0|obr:102718082|K13420 LRR receptor-like serine/threonine-protein kinase FLS2 [EC:2.7.11.1] | (RefSeq) LRR receptor-like serine/threonine-protein kinase FLS2	Plant-pathogen interaction (ko04626)	LRR receptor-like serine/threonine-protein kinase FLS2 OS=Oryza sativa subsp. japonica OX=39947 GN=FLS2 PE=1 SV=1	LRR receptor-like serine/threonine-protein kinase FLS2 [Aegilops tauschii subsp. tauschii]
TraesCS3D02G425600	--	--	--	--	--	--	uncharacterized protein LOC109782639 [Aegilops tauschii subsp. tauschii]
TraesCS2A02G365800	--	--	Molecular Function: core promoter sequence-specific DNA binding (GO:0001046);; Molecular Function: transcriptional activator activity, RNA polymerase II transcription regulatory region sequence-specific binding (GO:0001228);; Cellular Component: nucleus (GO:0005634);; Biological Process: positive regulation of transcription from RNA polymerase II promoter (GO:0045944);; Molecular Function: protei…	--	--	Transcription factor bHLH153 OS=Arabidopsis thaliana OX=3702 GN=BHLH153 PE=1 SV=1	transcription factor bHLH113-like [Aegilops tauschii subsp. tauschii]
TraesCS7B02G440000	[T]	Signal transduction mechanisms	Molecular Function: protein serine/threonine kinase activity (GO:0004674);; Molecular Function: ATP binding (GO:0005524);; Biological Process: protein phosphorylation (GO:0006468);; Cellular Component: chloroplast (GO:0009507);; Cellular Component: integral component of membrane (GO:0016021);; Molecular Function: ligase activity (GO:0016874);;	--	--	E3 ubiquitin-protein ligase KEG OS=Arabidopsis thaliana OX=3702 GN=KEG PE=1 SV=2	E3 ubiquitin-protein ligase KEG [Triticum urartu]
Triticum_aestivum_newGene_100648	--	--	--	--	--	Retrovirus-related Pol polyprotein from transposon RE2 OS=Arabidopsis thaliana OX=3702 GN=RE2 PE=4 SV=1	uncharacterized protein LOC109782366 [Aegilops tauschii subsp. tauschii]
TraesCS6A02G408600	[M]	Cell wall/membrane/envelope biogenesis	Molecular Function: protein serine/threonine kinase activity (GO:0004674);; Molecular Function: ATP binding (GO:0005524);; Biological Process: protein phosphorylation (GO:0006468);; Cellular Component: integral component of membrane (GO:0016021);; Molecular Function: carbohydrate binding (GO:0030246);;	K04733|6.06734e-167|bdi:100821462|K04733 interleukin-1 receptor-associated kinase 4 [EC:2.7.11.1] | (RefSeq) L-type lectin-domain containing receptor kinase IV.2-like	--	L-type lectin-domain containing receptor kinase IV.3 OS=Arabidopsis thaliana OX=3702 GN=LECRK43 PE=2 SV=1	L-type lectin-domain containing receptor kinase IV.4 [Triticum urartu]
TraesCS6A02G083100	--	--	--	--	--	AT-hook motif nuclear-localized protein 1 OS=Arabidopsis thaliana OX=3702 GN=AHL1 PE=1 SV=1	AT-hook motif nuclear-localized protein 2-like [Aegilops tauschii subsp. tauschii]
TraesCS2B02G160700	[T]	Signal transduction mechanisms	Molecular Function: heat shock protein binding (GO:0031072);; Molecular Function: unfolded protein binding (GO:0051082);;	--	--	--	protein SSUH2 homolog [Aegilops tauschii subsp. tauschii]
TraesCS5D02G401300	[O]	Posttranslational modification, protein turnover, chaperones	Molecular Function: cysteine-type endopeptidase activity (GO:0004197);; Cellular Component: extracellular space (GO:0005615);; Cellular Component: lysosome (GO:0005764);; Biological Process: proteolysis involved in cellular protein catabolic process (GO:0051603);;	--	--	Senescence-specific cysteine protease SAG39 OS=Oryza sativa subsp. indica OX=39946 GN=OsI_14861 PE=3 SV=1	senescence-specific cysteine protease SAG39-like [Aegilops tauschii subsp. tauschii]
TraesCS3A02G037200	--		Molecular Function: protein kinase activity (GO:0004672);; Molecular Function: ATP binding (GO:0005524);; Biological Process: protein phosphorylation (GO:0006468);; Cellular Component: plastid (GO:0009536);; Cellular Component: integral component of membrane (GO:0016021);;	--	--	Probable leucine-rich repeat receptor-like protein kinase At1g68400 OS=Arabidopsis thaliana OX=3702 GN=At1g68400 PE=2 SV=1	probable leucine-rich repeat receptor-like protein kinase At1g68400 [Aegilops tauschii subsp. tauschii]
TraesCS1D02G044300	[DPM]	Cell cycle control, cell division, chromosome partitioning;; Inorganic ion transport and metabolism;; Cell wall/membrane/envelope biogenesis	Molecular Function: copper ion binding (GO:0005507);; Molecular Function: oxidoreductase activity, oxidizing metal ions (GO:0016722);; Biological Process: lignin catabolic process (GO:0046274);; Cellular Component: apoplast (GO:0048046);; Molecular Function: hydroquinone:oxygen oxidoreductase activity (GO:0052716);; Biological Process: oxidation-reduction process (GO:0055114);;	K05909|0|sbi:SORBI_08g011530|K05909 laccase [EC:1.10.3.2] | (RefSeq) SORBIDRAFT_08g011530, Sb08g011530; hypothetical protein	--	Laccase-25 OS=Oryza sativa subsp. japonica OX=39947 GN=LAC25 PE=3 SV=1	laccase-25-like isoform X2 [Aegilops tauschii subsp. tauschii]
Triticum_aestivum_newGene_68019	--	--	--	--	--	Putative ribonuclease H protein At1g65750 OS=Arabidopsis thaliana OX=3702 GN=At1g65750 PE=3 SV=1	uncharacterized protein LOC109779578 [Aegilops tauschii subsp. tauschii]
TraesCS5B02G244000	--	--	Cellular Component: plastid (GO:0009536);;	--	--	GLABRA2 expression modulator OS=Arabidopsis thaliana OX=3702 GN=GEM PE=1 SV=1	GLABRA2 expression modulator-like [Aegilops tauschii subsp. tauschii]
TraesCS6A02G419100	--	--	Molecular Function: alpha-1,3-mannosylglycoprotein 2-beta-N-acetylglucosaminyltransferase activity (GO:0003827);; Cellular Component: endosome (GO:0005768);; Cellular Component: trans-Golgi network (GO:0005802);; Biological Process: N-glycan processing (GO:0006491);; Biological Process: hyperosmotic response (GO:0006972);; Molecular Function: protein N-acetylglucosaminyltransferase activity (GO:0…	K00726|0|bdi:100835640|K00726 alpha-1,3-mannosyl-glycoprotein beta-1,2-N-acetylglucosaminyltransferase [EC:2.4.1.101] | (RefSeq) alpha-1,3-mannosyl-glycoprotein 2-beta-N-acetylglucosaminyltransferase	N-Glycan biosynthesis (ko00510)	Alpha-1,3-mannosyl-glycoprotein 2-beta-N-acetylglucosaminyltransferase OS=Arabidopsis thaliana OX=3702 GN=GNTI PE=1 SV=1	alpha-1,3-mannosyl-glycoprotein 2-beta-N-acetylglucosaminyltransferase-like [Aegilops tauschii subsp. tauschii]
TraesCS2D02G575800	[HI]	Coenzyme transport and metabolism;; Lipid transport and metabolism	Molecular Function: 1-deoxy-D-xylulose-5-phosphate synthase activity (GO:0008661);; Biological Process: thiamine biosynthetic process (GO:0009228);; Cellular Component: chloroplast (GO:0009507);; Biological Process: terpenoid biosynthetic process (GO:0016114);; Molecular Function: metal ion binding (GO:0046872);; Biological Process: 1-deoxy-D-xylulose 5-phosphate biosynthetic process (GO:0052865)…	K01662|0|bdi:100821434|K01662 1-deoxy-D-xylulose-5-phosphate synthase [EC:2.2.1.7] | (RefSeq) probable 1-deoxy-D-xylulose-5-phosphate synthase 2, chloroplastic	Thiamine metabolism (ko00730);; Terpenoid backbone biosynthesis (ko00900)	Probable 1-deoxy-D-xylulose-5-phosphate synthase 2, chloroplastic OS=Oryza sativa subsp. japonica OX=39947 GN=Os07g0190000 PE=2 SV=1	probable 1-deoxy-D-xylulose-5-phosphate synthase 2, chloroplastic [Aegilops tauschii subsp. tauschii]
TraesCSU02G147200	--	--	Biological Process: lipid transport (GO:0006869);; Molecular Function: lipid binding (GO:0008289);; Cellular Component: integral component of membrane (GO:0016021);;	--	--	Non-specific lipid-transfer protein 4.1 OS=Hordeum vulgare OX=4513 GN=LTP4.1 PE=1 SV=1	non-specific lipid transfer protein 1 precursor [Triticum aestivum]
Triticum_aestivum_newGene_3907	--	--	--	--	--	Uncharacterized protein At3g03773 OS=Arabidopsis thaliana OX=3702 GN=At3g03773 PE=1 SV=1	uncharacterized protein At3g03773-like [Aegilops tauschii subsp. tauschii]
TraesCS2B02G237000	--	--	Molecular Function: protein serine/threonine kinase activity (GO:0004674);; Molecular Function: ATP binding (GO:0005524);; Cellular Component: plasma membrane (GO:0005886);; Biological Process: protein phosphorylation (GO:0006468);; Biological Process: defense response (GO:0006952);; Cellular Component: plasmodesma (GO:0009506);; Cellular Component: integral component of membrane (GO:0016021);; B…	--	--	Receptor-like serine/threonine-protein kinase SD1-8 OS=Arabidopsis thaliana OX=3702 GN=SD18 PE=1 SV=1	receptor-like serine/threonine-protein kinase SD1-8 isoform X2 [Aegilops tauschii subsp. tauschii]
TraesCS2B02G397000	--	--	Cellular Component: mitochondrion (GO:0005739);;	--	--	--	uncharacterized protein LOC109750221 [Aegilops tauschii subsp. tauschii]
TraesCS2B02G308700	--	--	--	--	--	--	uncharacterized protein LOC109744468 [Aegilops tauschii subsp. tauschii]
TraesCS3A02G389600	[J]	Translation, ribosomal structure and biogenesis	Molecular Function: nucleotide binding (GO:0000166);; Molecular Function: nucleic acid binding (GO:0003676);;	--	--	Probable RNA-binding protein ARP1 OS=Arabidopsis thaliana OX=3702 GN=ARP1 PE=2 SV=1	RNA-binding protein 24-B-like isoform X2 [Aegilops tauschii subsp. tauschii]
TraesCS7A02G227100	--	--	Biological Process: response to light stimulus (GO:0009416);; Cellular Component: photosystem I (GO:0009522);; Cellular Component: photosystem II (GO:0009523);; Cellular Component: chloroplast thylakoid membrane (GO:0009535);; Biological Process: photosynthesis, light harvesting in photosystem I (GO:0009768);; Cellular Component: chloroplast envelope (GO:0009941);; Cellular Component: plastoglobu…	K08907|2.73321e-164|bdi:100838367|K08907 light-harvesting complex I chlorophyll a/b binding protein 1 | (RefSeq) chlorophyll a-b binding protein 1B-21, chloroplastic	Photosynthesis - antenna proteins (ko00196)	Chlorophyll a-b binding protein 1B-21, chloroplastic OS=Hordeum vulgare OX=4513 GN=LHC Ib-21 PE=1 SV=1	chlorophyll a-b binding protein [Triticum aestivum]
TraesCS3B02G581800	[K]	Transcription	Molecular Function: DNA binding (GO:0003677);; Molecular Function: DNA-directed 5'-3' RNA polymerase activity (GO:0003899);; Biological Process: transcription, DNA-templated (GO:0006351);;	K16251|0|sita:101780080|K16251 DNA-directed RNA polymerase V subunit 1 [EC:2.7.7.6] | (RefSeq) DNA-directed RNA polymerase V subunit 1-like	--	DNA-directed RNA polymerase V subunit 1 OS=Arabidopsis thaliana OX=3702 GN=NRPE1 PE=1 SV=1	unnamed protein product [Triticum aestivum]
Triticum_aestivum_newGene_85656	--	--	Cellular Component: plastid (GO:0009536);; Biological Process: cellular metabolic process (GO:0044237);; Molecular Function: metal ion binding (GO:0046872);;	--	--	--	uncharacterized protein LOC109751285 [Aegilops tauschii subsp. tauschii]
TraesCS6B02G241300	--	--	--	--	--	--	putative protease Do-like 14 [Aegilops tauschii subsp. tauschii]
TraesCS4D02G337400	[QV]	Secondary metabolites biosynthesis, transport and catabolism;; Defense mechanisms	Molecular Function: monooxygenase activity (GO:0004497);; Molecular Function: iron ion binding (GO:0005506);; Cellular Component: integral component of membrane (GO:0016021);; Molecular Function: oxidoreductase activity, acting on paired donors, with incorporation or reduction of molecular oxygen (GO:0016705);; Molecular Function: heme binding (GO:0020037);; Biological Process: oxidation-reductio…	--	--	Alkane hydroxylase MAH1 OS=Arabidopsis thaliana OX=3702 GN=CYP96A15 PE=2 SV=1	alkane hydroxylase MAH1-like [Aegilops tauschii subsp. tauschii]
TraesCS3B02G440500	[Q]	Secondary metabolites biosynthesis, transport and catabolism	Molecular Function: metal ion binding (GO:0046872);; Molecular Function: dioxygenase activity (GO:0051213);; Biological Process: oxidation-reduction process (GO:0055114);;	--	--	S-norcoclaurine synthase 1 OS=Coptis japonica OX=3442 GN=NCS1 PE=1 SV=1	unnamed protein product [Triticum aestivum]
TraesCS3A02G471700	--	--	Molecular Function: aspartic-type endopeptidase activity (GO:0004190);; Biological Process: proteolysis (GO:0006508);; Molecular Function: hydrolase activity, acting on glycosyl bonds (GO:0016798);; Biological Process: xylan catabolic process (GO:0045493);;	--	--	Basic 7S globulin 2 OS=Glycine max OX=3847 PE=1 SV=1	xylanase inhibitor 725ACCN [Triticum aestivum]
Triticum_aestivum_newGene_69038	--	--	--	--	--	--	uncharacterized protein LOC109733531 [Aegilops tauschii subsp. tauschii]
TraesCS2B02G453000	--	--	Cellular Component: integral component of membrane (GO:0016021);;	--	--	Uncharacterized membrane protein At1g16860 OS=Arabidopsis thaliana OX=3702 GN=At1g16860 PE=1 SV=1	uncharacterized membrane protein At1g16860-like isoform X2 [Aegilops tauschii subsp. tauschii]
Triticum_aestivum_newGene_36031	--	--	Molecular Function: catalytic activity (GO:0003824);; Cellular Component: mitochondrion (GO:0005739);; Biological Process: tRNA processing (GO:0008033);; Cellular Component: plastid (GO:0009536);; Molecular Function: metal ion binding (GO:0046872);; Molecular Function: organic cyclic compound binding (GO:0097159);; Molecular Function: heterocyclic compound binding (GO:1901363);;	--	--	Retrovirus-related Pol polyprotein from transposon RE2 OS=Arabidopsis thaliana OX=3702 GN=RE2 PE=4 SV=1	uncharacterized protein LOC109771416 [Aegilops tauschii subsp. tauschii]
TraesCS2A02G194500	--	--	--	--	--	LOB domain-containing protein 37 OS=Arabidopsis thaliana OX=3702 GN=LBD37 PE=2 SV=1	LOB domain-containing protein 37-like [Aegilops tauschii subsp. tauschii]
TraesCS2B02G299900	--	--	Cellular Component: plastid (GO:0009536);; Molecular Function: heat shock protein binding (GO:0031072);; Molecular Function: unfolded protein binding (GO:0051082);;	--	--	--	uncharacterized protein LOC109782332 [Aegilops tauschii subsp. tauschii]
TraesCS1D02G292100	[E]	Amino acid transport and metabolism	Cellular Component: mitochondrion (GO:0005739);; Molecular Function: alanine-glyoxylate transaminase activity (GO:0008453);; Molecular Function: pyridoxal phosphate binding (GO:0030170);; Molecular Function: identical protein binding (GO:0042802);;	K00827|0|bdi:100824380|K00827 alanine-glyoxylate transaminase / (R)-3-amino-2-methylpropionate-pyruvate transaminase [EC:2.6.1.44 2.6.1.40] | (RefSeq) alanine--glyoxylate aminotransferase 2 homolog 3, mitochondrial-like	Alanine, aspartate and glutamate metabolism (ko00250);; Glycine, serine and threonine metabolism (ko00260);; Cysteine and methionine metabolism (ko00270);; Valine, leucine and isoleucine degradation (ko00280)	Alanine--glyoxylate aminotransferase 2 homolog 3, mitochondrial OS=Arabidopsis thaliana OX=3702 GN=At3g08860 PE=2 SV=1	alanine--glyoxylate aminotransferase 2 homolog 3, mitochondrial-like [Aegilops tauschii subsp. tauschii]
TraesCS3D02G239500	[G]	Carbohydrate transport and metabolism	Molecular Function: magnesium ion binding (GO:0000287);; Molecular Function: pyruvate kinase activity (GO:0004743);; Cellular Component: mitochondrion (GO:0005739);; Biological Process: glycolytic process (GO:0006096);; Biological Process: fatty acid biosynthetic process (GO:0006633);; Cellular Component: chloroplast stroma (GO:0009570);; Biological Process: seed maturation (GO:0010431);; Molecul…	K00873|0|bdi:100841333|K00873 pyruvate kinase [EC:2.7.1.40] | (RefSeq) plastidial pyruvate kinase 2	Glycolysis / Gluconeogenesis (ko00010);; Purine metabolism (ko00230);; Pyruvate metabolism (ko00620);; Carbon metabolism (ko01200);; Biosynthesis of amino acids (ko01230)	Plastidial pyruvate kinase 2 OS=Arabidopsis thaliana OX=3702 GN=PKP2 PE=1 SV=1	plastidial pyruvate kinase 2 [Aegilops tauschii subsp. tauschii]
TraesCS4D02G347100	[I]	Lipid transport and metabolism	Molecular Function: hydroxymethylglutaryl-CoA synthase activity (GO:0004421);; Biological Process: isoprenoid biosynthetic process (GO:0008299);;	K01641|0|bdi:100846544|K01641 hydroxymethylglutaryl-CoA synthase [EC:2.3.3.10] | (RefSeq) hydroxymethylglutaryl-CoA synthase-like	Synthesis and degradation of ketone bodies (ko00072);; Valine, leucine and isoleucine degradation (ko00280);; Butanoate metabolism (ko00650);; Terpenoid backbone biosynthesis (ko00900)	Hydroxymethylglutaryl-CoA synthase OS=Arabidopsis thaliana OX=3702 GN=HMGS PE=1 SV=2	hydroxymethylglutaryl-CoA synthase-like [Aegilops tauschii subsp. tauschii]
TraesCS5B02G534300	--	--	Cellular Component: plastid (GO:0009536);;	--	--	--	predicted protein [Hordeum vulgare subsp. vulgare]
TraesCS2B02G520700	--	--	--	--	--	--	hypothetical protein TRIUR3_13836 [Triticum urartu]
TraesCS3A02G095900	--	--	--	--	--	--	hypothetical protein TRIUR3_08548 [Triticum urartu]
TraesCS2B02G482500	--	--	--	--	--	Cold-regulated protein 2 (Fragment) OS=Hordeum vulgare OX=4513 PE=2 SV=1	predicted protein [Hordeum vulgare subsp. vulgare]
TraesCS1D02G230300	--	--	Molecular Function: zinc ion binding (GO:0008270);; Cellular Component: integral component of membrane (GO:0016021);;	--	--	E3 ubiquitin-protein ligase EL5 OS=Oryza sativa subsp. japonica OX=39947 GN=EL5.1 PE=1 SV=1	E3 ubiquitin-protein ligase EL5-like [Aegilops tauschii subsp. tauschii]
TraesCS1A02G317700	--	--	--	--	--	--	hypothetical protein TRIUR3_28123 [Triticum urartu]
TraesCS2A02G588300	[G]	Carbohydrate transport and metabolism	Molecular Function: sucrose alpha-glucosidase activity (GO:0004575);; Cellular Component: cell wall (GO:0005618);; Biological Process: carbohydrate metabolic process (GO:0005975);; Molecular Function: fructan beta-(2,6)-fructosidase activity (GO:0033949);; Cellular Component: apoplast (GO:0048046);;	K01193|0|sita:101781847|K01193 beta-fructofuranosidase [EC:3.2.1.26] | (RefSeq) beta-fructofuranosidase, insoluble isoenzyme 7-like	Galactose metabolism (ko00052);; Starch and sucrose metabolism (ko00500)	Fructan 6-exohydrolase OS=Triticum aestivum OX=4565 GN=6-FEH PE=1 SV=1	RecName: Full=Fructan 6-exohydrolase; Flags: Precursor
TraesCS2B02G146200	[OK]	Posttranslational modification, protein turnover, chaperones;; Transcription	Molecular Function: metalloendopeptidase activity (GO:0004222);; Biological Process: proteolysis (GO:0006508);; Cellular Component: integral component of membrane (GO:0016021);;	--	--	Membrane metalloprotease ARASP, chloroplastic OS=Arabidopsis thaliana OX=3702 GN=ARASP PE=2 SV=1	probable membrane metalloprotease ARASP2, chloroplastic [Aegilops tauschii subsp. tauschii]
TraesCS3B02G137400	--	--	Biological Process: flavonoid biosynthetic process (GO:0009813);; Cellular Component: intracellular membrane-bounded organelle (GO:0043231);; Biological Process: flavonoid glucuronidation (GO:0052696);; Molecular Function: quercetin 3-O-glucosyltransferase activity (GO:0080043);; Molecular Function: quercetin 7-O-glucosyltransferase activity (GO:0080044);;	--	--	Crocetin glucosyltransferase, chloroplastic OS=Gardenia jasminoides OX=114476 GN=UGT75L6 PE=1 SV=1	unnamed protein product [Triticum aestivum]
TraesCS5D02G436200	[F]	Nucleotide transport and metabolism	Molecular Function: xanthine dehydrogenase activity (GO:0004854);; Molecular Function: iron ion binding (GO:0005506);; Cellular Component: cytosol (GO:0005829);; Molecular Function: electron carrier activity (GO:0009055);; Biological Process: xanthine catabolic process (GO:0009115);; Molecular Function: oxidoreductase activity, acting on CH-OH group of donors (GO:0016614);; Molecular Function: ox…	K11817|0|bdi:100836900|K11817 indole-3-acetaldehyde oxidase [EC:1.2.3.7] | (RefSeq) probable aldehyde oxidase 2	Tryptophan metabolism (ko00380)	Probable aldehyde oxidase 2 OS=Oryza sativa subsp. japonica OX=39947 GN=Os03g0790900 PE=2 SV=1	probable aldehyde oxidase 2 [Aegilops tauschii subsp. tauschii]
TraesCS7A02G412700	--	--	Biological Process: flavonoid biosynthetic process (GO:0009813);; Cellular Component: intracellular membrane-bounded organelle (GO:0043231);; Biological Process: flavonoid glucuronidation (GO:0052696);; Molecular Function: quercetin 3-O-glucosyltransferase activity (GO:0080043);; Molecular Function: quercetin 7-O-glucosyltransferase activity (GO:0080044);;	--	--	7-deoxyloganetic acid glucosyltransferase OS=Catharanthus roseus OX=4058 GN=UGT709C2 PE=1 SV=1	7-deoxyloganetic acid glucosyltransferase-like [Aegilops tauschii subsp. tauschii]
TraesCS1A02G015800	[C]	Energy production and conversion	Molecular Function: NADPH dehydrogenase activity (GO:0003959);; Cellular Component: intracellular (GO:0005622);; Biological Process: defense response (GO:0006952);; Biological Process: jasmonic acid biosynthetic process (GO:0009695);; Molecular Function: FMN binding (GO:0010181);; Molecular Function: 12-oxophytodienoate reductase activity (GO:0016629);; Biological Process: oxylipin biosynthetic p…	K05894|0|bdi:100826659|K05894 12-oxophytodienoic acid reductase [EC:1.3.1.42] | (RefSeq) putative 12-oxophytodienoate reductase 4	alpha-Linolenic acid metabolism (ko00592)	Putative 12-oxophytodienoate reductase 5 OS=Oryza sativa subsp. japonica OX=39947 GN=OPR5 PE=2 SV=1	12-oxophytodienoate reductase 1-like [Aegilops tauschii subsp. tauschii]
Triticum_aestivum_newGene_15131	--	--	--	--	--	--	hypothetical protein TRIUR3_10557 [Triticum urartu]
TraesCS1B02G274300	--	--	Molecular Function: DNA binding (GO:0003677);; Cellular Component: nucleus (GO:0005634);; Biological Process: regulation of transcription, DNA-templated (GO:0006355);;	--	--	NAC domain-containing protein 48 OS=Oryza sativa subsp. japonica OX=39947 GN=NAC048 PE=1 SV=1	NAC domain-containing protein 48-like [Aegilops tauschii subsp. tauschii]
TraesCS6D02G264200	--	--	Molecular Function: DNA binding (GO:0003677);; Molecular Function: aspartic-type endopeptidase activity (GO:0004190);; Biological Process: proteolysis (GO:0006508);; Cellular Component: integral component of membrane (GO:0016021);; Biological Process: protein catabolic process (GO:0030163);;	--	--	Aspartyl protease family protein At5g10770 OS=Arabidopsis thaliana OX=3702 GN=At5g10770 PE=2 SV=1	aspartyl protease family protein At5g10770-like isoform X1 [Aegilops tauschii subsp. tauschii]
TraesCS5D02G526600	[K]	Transcription	--	--	--	Phytosulfokine receptor 2 OS=Arabidopsis thaliana OX=3702 GN=PSKR2 PE=2 SV=1	probable LRR receptor-like serine/threonine-protein kinase At4g36180 [Aegilops tauschii subsp. tauschii]
TraesCS4B02G038800	[H]	Coenzyme transport and metabolism	Biological Process: metabolic process (GO:0008152);; Molecular Function: hydrolase activity (GO:0016787);;	K07025|1.9457e-134|bdi:100839359|K07025 putative hydrolase of the HAD superfamily | (RefSeq) suppressor of disruption of TFIIS	--	--	suppressor of disruption of TFIIS-like [Aegilops tauschii subsp. tauschii]
TraesCS2B02G272300	--	--	Cellular Component: photosystem I (GO:0009522);; Cellular Component: chloroplast thylakoid membrane (GO:0009535);; Biological Process: photosynthesis (GO:0015979);; Cellular Component: integral component of membrane (GO:0016021);; Molecular Function: chlorophyll binding (GO:0016168);;	K02698|4.09549e-68|osa:4342404|K02698 photosystem I subunit X | (RefSeq) OJ1027_G06.2; photosystem I reaction center subunit psaK, chloroplastic	Photosynthesis (ko00195)	Photosystem I reaction center subunit psaK, chloroplastic OS=Hordeum vulgare OX=4513 GN=PSAK PE=1 SV=1	Photosystem I reaction center subunit psaK, chloroplastic [Triticum urartu]
TraesCS2A02G591000	--	--	Molecular Function: DNA binding (GO:0003677);; Biological Process: regulation of transcription, DNA-templated (GO:0006355);; Cellular Component: plastid (GO:0009536);;	--	--	Dof zinc finger protein DOF5.8 OS=Arabidopsis thaliana OX=3702 GN=DOF5.8 PE=2 SV=1	dof zinc finger protein DOF2.2-like [Aegilops tauschii subsp. tauschii]
TraesCS7B02G350000	[G]	Carbohydrate transport and metabolism	Cellular Component: mitochondrion (GO:0005739);; Biological Process: flavonoid biosynthetic process (GO:0009813);; Biological Process: flavonoid glucuronidation (GO:0052696);; Molecular Function: quercetin 3-O-glucosyltransferase activity (GO:0080043);; Molecular Function: quercetin 7-O-glucosyltransferase activity (GO:0080044);;	--	--	Crocetin glucosyltransferase, chloroplastic OS=Gardenia jasminoides OX=114476 GN=UGT75L6 PE=1 SV=1	cyanidin 3-O-rutinoside 5-O-glucosyltransferase-like [Aegilops tauschii subsp. tauschii]
TraesCS4A02G093200	--	--	--	--	--	--	uncharacterized protein LOC109782675 [Aegilops tauschii subsp. tauschii]
Triticum_aestivum_newGene_29789	--	--	--	--	--	--	hypothetical protein TRIUR3_10557 [Triticum urartu]
TraesCS7A02G453100	--	--	Cellular Component: mitochondrion (GO:0005739);;	--	--	--	uncharacterized protein LOC109768958 [Aegilops tauschii subsp. tauschii]
Triticum_aestivum_newGene_25645	--	--	--	--	--	--	hypothetical protein TRIUR3_20824 [Triticum urartu]
TraesCS2B02G439900	[I]	Lipid transport and metabolism	Molecular Function: phospholipase activity (GO:0004620);; Cellular Component: cytosol (GO:0005829);; Molecular Function: O-acyltransferase activity (GO:0008374);; Biological Process: phospholipid catabolic process (GO:0009395);;	--	--	Lecithin-cholesterol acyltransferase-like 4 OS=Arabidopsis thaliana OX=3702 GN=LCAT4 PE=1 SV=1	lecithin-cholesterol acyltransferase-like 4 isoform X2 [Aegilops tauschii subsp. tauschii]
TraesCS6B02G203300	[QV]	Secondary metabolites biosynthesis, transport and catabolism;; Defense mechanisms	Molecular Function: iron ion binding (GO:0005506);; Cellular Component: integral component of membrane (GO:0016021);; Molecular Function: oxidoreductase activity, acting on paired donors, with incorporation or reduction of molecular oxygen, NAD(P)H as one donor, and incorporation of one atom of oxygen (GO:0016709);; Molecular Function: heme binding (GO:0020037);; Biological Process: secondary met…	--	--	Premnaspirodiene oxygenase OS=Hyoscyamus muticus OX=35626 GN=CYP71D55 PE=1 SV=1	premnaspirodiene oxygenase-like [Aegilops tauschii subsp. tauschii]
TraesCS3D02G254900	[P]	Inorganic ion transport and metabolism	Molecular Function: protein binding (GO:0005515);; Cellular Component: plasma membrane (GO:0005886);; Biological Process: nitrate transport (GO:0015706);; Cellular Component: integral component of membrane (GO:0016021);; Biological Process: nitrate assimilation (GO:0042128);; Biological Process: transmembrane transport (GO:0055085);;	K02575|0|bdi:100835409|K02575 MFS transporter, NNP family, nitrate/nitrite transporter | (RefSeq) high-affinity nitrate transporter 2.3	Nitrogen metabolism (ko00910)	High-affinity nitrate transporter 2.3 OS=Oryza sativa subsp. japonica OX=39947 GN=NRT2.3 PE=1 SV=1	high-affinity nitrate transporter 2.3 [Aegilops tauschii subsp. tauschii]
Triticum_aestivum_newGene_17473	--	--	Cellular Component: nucleus (GO:0005634);; Biological Process: chromatin assembly or disassembly (GO:0006333);;	K10753|1.11023e-13|osa:4339550|K10753 histone chaperone ASF1 | (RefSeq) probable histone chaperone ASF1A	--	Histone chaperone ASF1B OS=Arabidopsis thaliana OX=3702 GN=ASF1B PE=1 SV=1	anti-silencing function 1A-like [Oryza sativa Japonica Group]
TraesCS4B02G017500	--	--	Molecular Function: binding (GO:0005488);; Cellular Component: plant-type cell wall (GO:0009505);; Biological Process: response to cytokinin (GO:0009735);; Molecular Function: nutrient reservoir activity (GO:0045735);;	--	--	63 kDa globulin-like protein OS=Oryza sativa subsp. japonica OX=39947 GN=Os03g0663800 PE=1 SV=1	globulin 3 [Triticum aestivum]
TraesCS5B02G394600	[T]	Signal transduction mechanisms	Biological Process: response to stress (GO:0006950);;	--	--	Universal stress protein A-like protein OS=Arabidopsis thaliana OX=3702 GN=At3g01520 PE=1 SV=2	universal stress protein A-like protein [Aegilops tauschii subsp. tauschii]
Triticum_aestivum_newGene_75428	--	--	Cellular Component: cytoplasm (GO:0005737);; Biological Process: metal ion transport (GO:0030001);; Molecular Function: transition metal ion binding (GO:0046914);; Biological Process: cellular transition metal ion homeostasis (GO:0046916);;	--	--	Protein PYRICULARIA ORYZAE RESISTANCE 21 OS=Oryza sativa subsp. indica OX=39946 GN=PI21 PE=4 SV=1	protein PYRICULARIA ORYZAE RESISTANCE 21-like [Aegilops tauschii subsp. tauschii]
TraesCS1A02G186100	[O]	Posttranslational modification, protein turnover, chaperones	Molecular Function: glutathione transferase activity (GO:0004364);; Cellular Component: cytoplasm (GO:0005737);; Biological Process: glutathione metabolic process (GO:0006749);; Biological Process: toxin catabolic process (GO:0009407);;	K00799|3.02845e-112|osa:4349207|K00799 glutathione S-transferase [EC:2.5.1.18] | (RefSeq) GSTU6; probable glutathione S-transferase GSTU6	Glutathione metabolism (ko00480)	Probable glutathione S-transferase GSTU6 OS=Oryza sativa subsp. japonica OX=39947 GN=GSTU6 PE=2 SV=2	probable glutathione S-transferase GSTU6 [Aegilops tauschii subsp. tauschii]
TraesCS2B02G369100	[R]	General function prediction only	Molecular Function: chitinase activity (GO:0004568);; Biological Process: carbohydrate metabolic process (GO:0005975);; Biological Process: chitin catabolic process (GO:0006032);; Molecular Function: chitin binding (GO:0008061);; Biological Process: cell wall macromolecule catabolic process (GO:0016998);;	K01183|4.83964e-120|bdi:100841292|K01183 chitinase [EC:3.2.1.14] | (RefSeq) chitinase 5-like	Amino sugar and nucleotide sugar metabolism (ko00520)	Chitinase 5 OS=Oryza sativa subsp. japonica OX=39947 GN=Cht5 PE=2 SV=1	chitinase IV precursor [Triticum aestivum]
TraesCS6D02G312000	--	--	Cellular Component: plastid (GO:0009536);;	--	--	--	uncharacterized protein LOC109757077 isoform X1 [Aegilops tauschii subsp. tauschii]
TraesCS1B02G017700	--	--	Biological Process: killing of cells of other organism (GO:0031640);; Biological Process: defense response to fungus (GO:0050832);;	--	--	Defensin Tk-AMP-D2 OS=Triticum kiharae OX=376535 PE=1 SV=1	defensin [Triticum aestivum]
TraesCS2B02G477000	--	--	Cellular Component: mitochondrion (GO:0005739);; Cellular Component: integral component of membrane (GO:0016021);;	--	--	--	uncharacterized protein LOC109765516 [Aegilops tauschii subsp. tauschii]
Triticum_aestivum_newGene_18911	--	--	Cellular Component: membrane (GO:0016020);;	--	--	--	hypothetical protein TRIUR3_10405 [Triticum urartu]
TraesCS2A02G400100	--	--	Molecular Function: ubiquitin-protein transferase activity (GO:0004842);; Molecular Function: zinc ion binding (GO:0008270);; Biological Process: protein ubiquitination (GO:0016567);; Biological Process: negative regulation of organ growth (GO:0046621);;	--	--	F-box protein PP2-A13 OS=Arabidopsis thaliana OX=3702 GN=PP2A13 PE=1 SV=1	F-box protein PP2-A13-like [Aegilops tauschii subsp. tauschii]
Triticum_aestivum_newGene_35516	--	--	--	--	--	Protein FAR1-RELATED SEQUENCE 5 OS=Arabidopsis thaliana OX=3702 GN=FRS5 PE=1 SV=1	protein FAR1-RELATED SEQUENCE 5-like [Aegilops tauschii subsp. tauschii]
TraesCS6A02G078400	--	--	--	--	--	Basic secretory protease (Fragments) OS=Boswellia serrata OX=613112 PE=1 SV=1	uncharacterized protein LOC109755122 [Aegilops tauschii subsp. tauschii]
TraesCS2B02G424800	--	--	--	--	--	--	hypothetical protein TRIUR3_23125 [Triticum urartu]
Triticum_aestivum_newGene_14319	--	--	--	--	--	--	hypothetical protein TRIUR3_26654 [Triticum urartu]
Triticum_aestivum_newGene_100803	--	--	--	--	--	--	uncharacterized protein LOC109781241 [Aegilops tauschii subsp. tauschii]
Triticum_aestivum_newGene_14317	--	--	--	--	--	--	uncharacterized protein LOC109773413 [Aegilops tauschii subsp. tauschii]
TraesCS7D02G432800	[Q]	Secondary metabolites biosynthesis, transport and catabolism	Molecular Function: oxidoreductase activity (GO:0016491);; Molecular Function: metal ion binding (GO:0046872);; Biological Process: oxidation-reduction process (GO:0055114);;	--	--	1-aminocyclopropane-1-carboxylate oxidase homolog 1 OS=Arabidopsis thaliana OX=3702 GN=At1g06620 PE=2 SV=1	DIBOA-glucoside dioxygenase BX6-like [Aegilops tauschii subsp. tauschii]
TraesCS2B02G445100	--	--	Molecular Function: magnesium ion binding (GO:0000287);; Biological Process: metabolic process (GO:0008152);; Molecular Function: terpene synthase activity (GO:0010333);;	K04121|0|bdi:100827748|K04121 ent-kaurene synthase [EC:4.2.3.19] | (RefSeq) ent-kaur-16-ene synthase, chloroplastic-like	Diterpenoid biosynthesis (ko00904)	Ent-kaur-16-ene synthase, chloroplastic OS=Oryza sativa subsp. japonica OX=39947 GN=KS1 PE=1 SV=1	ent-kaurene synthase like 3 [Triticum aestivum]
TraesCS5A02G500300	[G]	Carbohydrate transport and metabolism	Molecular Function: transporter activity (GO:0005215);; Cellular Component: integral component of membrane (GO:0016021);; Biological Process: transmembrane transport (GO:0055085);;	--	--	Protein ZINC INDUCED FACILITATOR-LIKE 1 OS=Arabidopsis thaliana OX=3702 GN=ZIFL1 PE=2 SV=1	Protein ZINC INDUCED FACILITATOR-LIKE 1 [Triticum urartu]
TraesCS3B02G063500	--	--	Biological Process: lipid transport (GO:0006869);; Molecular Function: lipid binding (GO:0008289);;	--	--	Non-specific lipid-transfer protein 4.1 OS=Hordeum vulgare OX=4513 GN=LTP4.1 PE=1 SV=1	type 1 non-specific lipid transfer protein precursor, partial [Triticum turgidum subsp. durum]
TraesCS2D02G028900	[Q]	Secondary metabolites biosynthesis, transport and catabolism	Molecular Function: metal ion binding (GO:0046872);; Molecular Function: dioxygenase activity (GO:0051213);; Biological Process: oxidation-reduction process (GO:0055114);;	--	--	1-aminocyclopropane-1-carboxylate oxidase homolog 2 OS=Arabidopsis thaliana OX=3702 GN=At1g06640 PE=2 SV=1	1-aminocyclopropane-1-carboxylate oxidase homolog 1-like [Aegilops tauschii subsp. tauschii]
TraesCS3D02G390100	--	--	Cellular Component: mitochondrion (GO:0005739);; Biological Process: response to stress (GO:0006950);;	--	--	Protein SENESCENCE-ASSOCIATED GENE 21, mitochondrial OS=Arabidopsis thaliana OX=3702 GN=SAG21 PE=2 SV=1	protein SENESCENCE-ASSOCIATED GENE 21, mitochondrial-like [Aegilops tauschii subsp. tauschii]
Triticum_aestivum_newGene_55344	[J]	Translation, ribosomal structure and biogenesis	Biological Process: mRNA splicing, via spliceosome (GO:0000398);; Molecular Function: ATP-dependent RNA helicase activity (GO:0004004);; Molecular Function: ATP binding (GO:0005524);; Cellular Component: spliceosomal complex (GO:0005681);; Cellular Component: cytoplasm (GO:0005737);; Molecular Function: RNA binding (GO:0044822);;	K12813|0|bdi:100834233|K12813 pre-mRNA-splicing factor ATP-dependent RNA helicase DHX16 [EC:3.6.4.13] | (RefSeq) putative pre-mRNA-splicing factor ATP-dependent RNA helicase DHX16	Spliceosome (ko03040)	Pre-mRNA-splicing factor ATP-dependent RNA helicase DEAH1 OS=Arabidopsis thaliana OX=3702 GN=ESP3 PE=1 SV=1	pre-mRNA-splicing factor ATP-dependent RNA helicase DEAH1-like isoform X1 [Aegilops tauschii subsp. tauschii]
TraesCS1D02G147800	[I]	Lipid transport and metabolism	Molecular Function: iron ion binding (GO:0005506);; Cellular Component: endoplasmic reticulum (GO:0005783);; Biological Process: fatty acid biosynthetic process (GO:0006633);; Biological Process: wax biosynthetic process (GO:0010025);; Biological Process: cutin biosynthetic process (GO:0010143);; Cellular Component: integral component of membrane (GO:0016021);; Molecular Function: oxidoreductase …	K15404|0|bdi:100833295|K15404 aldehyde decarbonylase [EC:4.1.99.5] | (RefSeq) protein ECERIFERUM 1-like	Cutin, suberine and wax biosynthesis (ko00073)	Protein ECERIFERUM 1 OS=Arabidopsis thaliana OX=3702 GN=CER1 PE=1 SV=1	protein ECERIFERUM 1-like [Aegilops tauschii subsp. tauschii]
TraesCS2B02G411700	--	--	Cellular Component: extracellular region (GO:0005576);; Cellular Component: cell wall (GO:0005618);; Biological Process: plant-type cell wall organization (GO:0009664);; Cellular Component: membrane (GO:0016020);;	--	--	Expansin-A10 OS=Oryza sativa subsp. japonica OX=39947 GN=EXPA10 PE=2 SV=2	expansin EXPA7 [Triticum aestivum]
Triticum_aestivum_newGene_54982	[X]	Mobilome: prophages, transposons	Molecular Function: DNA binding (GO:0003677);; Cellular Component: mitochondrion (GO:0005739);; Biological Process: DNA recombination (GO:0006310);; Cellular Component: plastid (GO:0009536);;	--	--	Retrovirus-related Pol polyprotein from transposon TNT 1-94 OS=Nicotiana tabacum OX=4097 PE=2 SV=1	OSJNBb0034I13.10 [Oryza sativa Japonica Group]
TraesCS2D02G571700	--	--	Molecular Function: calcium ion binding (GO:0005509);; Molecular Function: calcium-dependent phospholipid binding (GO:0005544);; Cellular Component: plasma membrane (GO:0005886);; Cellular Component: integral component of membrane (GO:0016021);;	--	--	FT-interacting protein 1 OS=Arabidopsis thaliana OX=3702 GN=FTIP1 PE=1 SV=1	FT-interacting protein 1-like [Aegilops tauschii subsp. tauschii]
TraesCS4A02G442400	[R]	General function prediction only	Cellular Component: nucleus (GO:0005634);; Molecular Function: O-methyltransferase activity (GO:0008171);; Molecular Function: S-adenosylmethionine-dependent methyltransferase activity (GO:0008757);; Biological Process: methylation (GO:0032259);; Molecular Function: metal ion binding (GO:0046872);;	K18883|1.73751e-134|bdi:100835440|K18883 tricin synthase [EC:2.1.1.175] | (RefSeq) tricin synthase 1-like	--	Tricin synthase 1 OS=Oryza sativa subsp. japonica OX=39947 GN=ROMT-15 PE=1 SV=1	tricin synthase 1-like [Aegilops tauschii subsp. tauschii]
TraesCS5D02G530800	[QR]	Secondary metabolites biosynthesis, transport and catabolism;; General function prediction only	Molecular Function: S-adenosylmethionine-dependent methyltransferase activity (GO:0008757);; Biological Process: methylation (GO:0032259);;	--	--	Probable thiol methyltransferase 2 OS=Arabidopsis thaliana OX=3702 GN=HOL3 PE=1 SV=1	probable thiol methyltransferase 2 [Aegilops tauschii subsp. tauschii]
TraesCS4A02G020100	[G]	Carbohydrate transport and metabolism	Biological Process: carbohydrate transport (GO:0008643);; Cellular Component: integral component of membrane (GO:0016021);;	--	--	--	predicted protein [Hordeum vulgare subsp. vulgare]
Triticum_aestivum_newGene_25505	[C]	Energy production and conversion	Molecular Function: NADPH dehydrogenase activity (GO:0003959);; Cellular Component: mitochondrion (GO:0005739);; Molecular Function: FMN binding (GO:0010181);; Biological Process: oxylipin biosynthetic process (GO:0031408);; Biological Process: oxidation-reduction process (GO:0055114);;	K05894|1.18627e-162|bdi:100828447|K05894 12-oxophytodienoic acid reductase [EC:1.3.1.42] | (RefSeq) putative 12-oxophytodienoate reductase 11	alpha-Linolenic acid metabolism (ko00592)	Putative 12-oxophytodienoate reductase 11 OS=Oryza sativa subsp. japonica OX=39947 GN=OPR11 PE=2 SV=1	12-oxophytodienoate reductase 2 [Triticum urartu]
TraesCS2A02G430600	--	--	Cellular Component: plasma membrane (GO:0005886);; Molecular Function: sodium ion transmembrane transporter activity (GO:0015081);; Cellular Component: integral component of membrane (GO:0016021);; Biological Process: sodium ion transmembrane transport (GO:0035725);;	--	--	Probable cation transporter HKT7 OS=Oryza sativa subsp. japonica OX=39947 GN=HKT7 PE=2 SV=2	HKT1;4-1 [Triticum turgidum subsp. durum]
TraesCS7D02G186600	--	--	Cellular Component: mitochondrion (GO:0005739);; Molecular Function: electron carrier activity (GO:0009055);; Molecular Function: protein disulfide oxidoreductase activity (GO:0015035);; Biological Process: cell redox homeostasis (GO:0045454);; Biological Process: oxidation-reduction process (GO:0055114);;	K17479|1.70043e-65|sita:101763264|K17479 glutaredoxin domain-containing cysteine-rich protein 1 | (RefSeq) uncharacterized protein At3g28850-like	--	Uncharacterized protein At5g39865 OS=Arabidopsis thaliana OX=3702 GN=At5g39865 PE=2 SV=1	uncharacterized protein LOC109754185 [Aegilops tauschii subsp. tauschii]
TraesCS5D02G501000	[G]	Carbohydrate transport and metabolism	Biological Process: flavonoid biosynthetic process (GO:0009813);; Cellular Component: intracellular membrane-bounded organelle (GO:0043231);; Biological Process: flavonoid glucuronidation (GO:0052696);; Molecular Function: quercetin 3-O-glucosyltransferase activity (GO:0080043);; Molecular Function: quercetin 7-O-glucosyltransferase activity (GO:0080044);;	--	--	DIMBOA UDP-glucosyltransferase BX8 OS=Zea mays OX=4577 GN=Bx8 PE=1 SV=1	DIMBOA UDP-glucosyltransferase BX8-like [Aegilops tauschii subsp. tauschii]
Triticum_aestivum_newGene_28495	--	--	--	--	--	--	uncharacterized protein LOC109768065 [Aegilops tauschii subsp. tauschii]
Triticum_aestivum_newGene_58750	--	--	--	--	--	--	hypothetical protein TRIUR3_29929 [Triticum urartu]
TraesCS2B02G362000	--	--	Cellular Component: protein phosphatase type 2A complex (GO:0000159);; Biological Process: signal transduction (GO:0007165);; Biological Process: regulation of phosphoprotein phosphatase activity (GO:0034047);;	K11584|0|osa:4336207|K11584 serine/threonine-protein phosphatase 2A regulatory subunit B' | (RefSeq) serine/threonine protein phosphatase 2A 57 kDa regulatory subunit B' theta isoform	mRNA surveillance pathway (ko03015)	Serine/threonine protein phosphatase 2A 59 kDa regulatory subunit B&apos; eta isoform OS=Arabidopsis thaliana OX=3702 GN=B&apos;ETA PE=1 SV=1	serine/threonine protein phosphatase 2A 57 kDa regulatory subunit B&apos; theta isoform-like [Aegilops tauschii subsp. tauschii]
TraesCS2B02G430000	[G]	Carbohydrate transport and metabolism	Cellular Component: mitochondrion (GO:0005739);; Biological Process: anion transport (GO:0006820);; Cellular Component: integral component of membrane (GO:0016021);; Molecular Function: transmembrane transporter activity (GO:0022857);; Biological Process: transmembrane transport (GO:0055085);;	K13783|0|bdi:100825268|K13783 MFS transporter, OPA family, solute carrier family 37 (glycerol-3-phosphate transporter), member 1/2 | (RefSeq) putative glycerol-3-phosphate transporter 1	--	Putative glycerol-3-phosphate transporter 1 OS=Arabidopsis thaliana OX=3702 GN=At3g47420 PE=2 SV=1	putative glycerol-3-phosphate transporter 1 [Aegilops tauschii subsp. tauschii]
TraesCS1B02G269100	[O]	Posttranslational modification, protein turnover, chaperones	Molecular Function: glutathione transferase activity (GO:0004364);; Cellular Component: cytoplasm (GO:0005737);; Biological Process: glutathione metabolic process (GO:0006749);; Biological Process: toxin catabolic process (GO:0009407);;	K00799|1.01592e-142|bdi:100835328|K00799 glutathione S-transferase [EC:2.5.1.18] | (RefSeq) glutathione transferase GST 23-like	Glutathione metabolism (ko00480)	Glutathione transferase GST 23 OS=Zea mays OX=4577 PE=2 SV=1	glutathione transferase GST 23-like [Aegilops tauschii subsp. tauschii]
TraesCS2A02G516800	[E]	Amino acid transport and metabolism	Biological Process: cellular amino acid metabolic process (GO:0006520);; Molecular Function: carboxy-lyase activity (GO:0016831);; Molecular Function: pyridoxal phosphate binding (GO:0030170);;	K01592|0|bdi:100832786|K01592 tyrosine decarboxylase [EC:4.1.1.25] | (RefSeq) aromatic-L-amino-acid decarboxylase-like	Tyrosine metabolism (ko00350);; Isoquinoline alkaloid biosynthesis (ko00950)	Aromatic-L-amino-acid decarboxylase OS=Catharanthus roseus OX=4058 GN=TDC PE=2 SV=1	aromatic-L-amino-acid decarboxylase-like [Aegilops tauschii subsp. tauschii]
TraesCS7A02G438700	--	--	--	--	--	--	uncharacterized protein LOC109784196 [Aegilops tauschii subsp. tauschii]
TraesCS1B02G323200	--	--	Cellular Component: membrane (GO:0016020);; Molecular Function: metal ion binding (GO:0046872);;	--	--	RING-H2 finger protein ATL32 OS=Arabidopsis thaliana OX=3702 GN=ATL32 PE=2 SV=3	probable E3 ubiquitin-protein ligase plr-1 [Aegilops tauschii subsp. tauschii]
Triticum_aestivum_newGene_28593	--	--	--	--	--	--	uncharacterized protein LOC109752201 [Aegilops tauschii subsp. tauschii]
TraesCS2B02G475900	--	--	--	--	--	--	hypothetical protein TRIUR3_24038 [Triticum urartu]
TraesCS2B02G324200	--	--	Cellular Component: cytoplasm (GO:0005737);; Molecular Function: glycolipid transporter activity (GO:0017089);; Biological Process: glycolipid transport (GO:0046836);; Molecular Function: glycolipid binding (GO:0051861);;	--	--	Glycolipid transfer protein 3 OS=Arabidopsis thaliana OX=3702 GN=GLTP3 PE=2 SV=1	glycolipid transfer protein 3-like [Aegilops tauschii subsp. tauschii]
TraesCS3A02G152500	[QV]	Secondary metabolites biosynthesis, transport and catabolism;; Defense mechanisms	Molecular Function: iron ion binding (GO:0005506);; Cellular Component: integral component of membrane (GO:0016021);; Molecular Function: oxidoreductase activity, acting on paired donors, with incorporation or reduction of molecular oxygen, NAD(P)H as one donor, and incorporation of one atom of oxygen (GO:0016709);; Molecular Function: heme binding (GO:0020037);; Biological Process: secondary met…	K07408|4.80091e-154|sita:101775282|K07408 cytochrome P450 family 1 subfamily A polypeptide 1 [EC:1.14.14.1] | (RefSeq) cytochrome P450 71A1-like	--	Cytochrome P450 71A1 OS=Persea americana OX=3435 GN=CYP71A1 PE=1 SV=2	unnamed protein product [Triticum aestivum]
Triticum_aestivum_newGene_48780	--	--	Biological Process: regulation of transcription, DNA-templated (GO:0006355);;	--	--	--	uncharacterized protein LOC109755511 [Aegilops tauschii subsp. tauschii]
TraesCS2D02G294600	--	--	Cellular Component: mitochondrion (GO:0005739);;	--	--	Transcription repressor OFP13 OS=Arabidopsis thaliana OX=3702 GN=OFP13 PE=1 SV=1	transcription repressor OFP13-like [Aegilops tauschii subsp. tauschii]
TraesCS7D02G027600	--	--	Molecular Function: iron ion transmembrane transporter activity (GO:0005381);; Molecular Function: manganese ion transmembrane transporter activity (GO:0005384);; Cellular Component: endoplasmic reticulum (GO:0005783);; Biological Process: intracellular sequestering of iron ion (GO:0006880);; Cellular Component: ER body (GO:0010168);; Cellular Component: integral component of membrane (GO:0016021…	--	--	Membrane protein of ER body 1 OS=Arabidopsis thaliana OX=3702 GN=MEB1 PE=1 SV=1	hypothetical protein TRIUR3_11532 [Triticum urartu]
TraesCS2A02G091900	[K]	Transcription	Cellular Component: membrane (GO:0016020);; Molecular Function: kinase activity (GO:0016301);; Biological Process: phosphorylation (GO:0016310);;	--	--	Putative kinase-like protein TMKL1 OS=Arabidopsis thaliana OX=3702 GN=TMKL1 PE=1 SV=1	putative kinase-like protein TMKL1 [Aegilops tauschii subsp. tauschii]
Triticum_aestivum_newGene_47290	--	--	--	--	--	--	verprolin-like [Aegilops tauschii subsp. tauschii]
Triticum_aestivum_newGene_23619	--	--	Molecular Function: protein serine/threonine kinase activity (GO:0004674);; Molecular Function: ATP binding (GO:0005524);; Cellular Component: plasma membrane (GO:0005886);; Biological Process: protein phosphorylation (GO:0006468);;	--	--	Serine/threonine-protein kinase EDR1 OS=Arabidopsis thaliana OX=3702 GN=EDR1 PE=1 SV=1	putative MAPKK kinase, partial [Hordeum vulgare subsp. vulgare]
TraesCS1A02G414500	[Q]	Secondary metabolites biosynthesis, transport and catabolism	Molecular Function: metal ion binding (GO:0046872);; Molecular Function: dioxygenase activity (GO:0051213);; Biological Process: oxidation-reduction process (GO:0055114);;	--	--	Probable 2-oxoglutarate-dependent dioxygenase AOP1.2 OS=Arabidopsis thaliana OX=3702 GN=AOP1.2 PE=2 SV=1	predicted protein [Hordeum vulgare subsp. vulgare]
TraesCS3A02G050800	[MR]	Cell wall/membrane/envelope biogenesis;; General function prediction only	Biological Process: metabolic process (GO:0008152);; Cellular Component: plastid (GO:0009536);; Molecular Function: isomerase activity (GO:0016853);;	--	--	L-Ala-D/L-amino acid epimerase OS=Populus trichocarpa OX=3694 GN=POPTR_0012s05040g PE=3 SV=2	L-Ala-D/L-amino acid epimerase-like [Aegilops tauschii subsp. tauschii]
Triticum_aestivum_newGene_19860	--	--	Molecular Function: 6-phosphofructokinase activity (GO:0003872);; Molecular Function: metalloendopeptidase activity (GO:0004222);; Molecular Function: ATP binding (GO:0005524);; Cellular Component: cytoplasm (GO:0005737);; Biological Process: fructose 6-phosphate metabolic process (GO:0006002);; Biological Process: proteolysis (GO:0006508);; Molecular Function: metal ion binding (GO:0046872);; Bi…	K00850|1.08516e-20|sita:101762411|K00850 6-phosphofructokinase 1 [EC:2.7.1.11] | (RefSeq) ATP-dependent 6-phosphofructokinase 6-like	Glycolysis / Gluconeogenesis (ko00010);; Pentose phosphate pathway (ko00030);; Fructose and mannose metabolism (ko00051);; Galactose metabolism (ko00052);; Carbon metabolism (ko01200);; Biosynthesis of amino acids (ko01230);; RNA degradation (ko03018)	--	ATP-dependent 6-phosphofructokinase 6-like [Aegilops tauschii subsp. tauschii]
TraesCS2B02G046500	[P]	Inorganic ion transport and metabolism	Biological Process: sulfate assimilation (GO:0000103);; Molecular Function: adenylylsulfate kinase activity (GO:0004020);; Molecular Function: sulfate adenylyltransferase (ATP) activity (GO:0004781);; Cellular Component: cytosol (GO:0005829);; Cellular Component: chloroplast stroma (GO:0009570);; Biological Process: phosphorylation (GO:0016310);;	K13811|0|bdi:100837643|K13811 3'-phosphoadenosine 5'-phosphosulfate synthase [EC:2.7.7.4 2.7.1.25] | (RefSeq) ATP sulfurylase 2	Purine metabolism (ko00230);; Monobactam biosynthesis (ko00261);; Selenocompound metabolism (ko00450);; Sulfur metabolism (ko00920)	ATP sulfurylase 2 OS=Arabidopsis thaliana OX=3702 GN=APS2 PE=1 SV=1	ATP sulfurylase 2-like [Aegilops tauschii subsp. tauschii]
TraesCS6B02G353200	[C]	Energy production and conversion	Molecular Function: NADPH dehydrogenase activity (GO:0003959);; Cellular Component: mitochondrion (GO:0005739);; Molecular Function: FMN binding (GO:0010181);; Biological Process: oxylipin biosynthetic process (GO:0031408);; Biological Process: oxidation-reduction process (GO:0055114);;	K05894|0|bdi:100828447|K05894 12-oxophytodienoic acid reductase [EC:1.3.1.42] | (RefSeq) putative 12-oxophytodienoate reductase 11	alpha-Linolenic acid metabolism (ko00592)	Putative 12-oxophytodienoate reductase 11 OS=Oryza sativa subsp. japonica OX=39947 GN=OPR11 PE=2 SV=1	putative 12-oxophytodienoate reductase 11 [Aegilops tauschii subsp. tauschii]
Triticum_aestivum_newGene_61180	[M]	Cell wall/membrane/envelope biogenesis	Biological Process: carbohydrate metabolic process (GO:0005975);; Cellular Component: integral component of membrane (GO:0016021);; Molecular Function: racemase and epimerase activity, acting on carbohydrates and derivatives (GO:0016857);;	K08678|2.48111e-49|bna:106438334|K08678 UDP-glucuronate decarboxylase [EC:4.1.1.35] | (RefSeq) UDP-glucuronic acid decarboxylase 4-like	Starch and sucrose metabolism (ko00500);; Amino sugar and nucleotide sugar metabolism (ko00520)	UDP-glucuronic acid decarboxylase 4 OS=Arabidopsis thaliana OX=3702 GN=UXS4 PE=2 SV=1	UDP-D-glucuronate decarboxylase [Triticum aestivum]
Triticum_aestivum_newGene_68846	--	--	Cellular Component: mitochondrion (GO:0005739);; Biological Process: cell division (GO:0051301);;	K11790|7.13678e-42|osa:4333813|K11790 denticleless | (RefSeq) denticleless protein homolog	--	Coatomer subunit beta&apos;-1 OS=Arabidopsis thaliana OX=3702 GN=At1g79990 PE=2 SV=2	denticleless protein homolog isoform X1 [Aegilops tauschii subsp. tauschii]
Triticum_aestivum_newGene_36057	--	--	--	--	--	--	hAT dimerization domain-containing protein [Zea mays]
TraesCS2B02G454100	[K]	Transcription	--	--	--	Plant intracellular Ras-group-related LRR protein 1 OS=Oryza sativa subsp. japonica OX=39947 GN=IRL1 PE=2 SV=2	leucine-rich repeat protein 2 [Triticum aestivum]
TraesCS2B02G396700	[G]	Carbohydrate transport and metabolism	Cellular Component: vacuole (GO:0005773);; Cellular Component: integral component of plasma membrane (GO:0005887);; Biological Process: water transport (GO:0006833);; Cellular Component: plasmodesma (GO:0009506);; Biological Process: cellular water homeostasis (GO:0009992);; Molecular Function: water channel activity (GO:0015250);; Molecular Function: glycerol channel activity (GO:0015254);; Biol…	K09872|1.63067e-179|sita:101761554|K09872 aquaporin PIP | (RefSeq) aquaporin PIP2-5	--	Aquaporin PIP2-5 OS=Zea mays OX=4577 GN=PIP2-5 PE=1 SV=1	aquaporin PIP2-5-like [Aegilops tauschii subsp. tauschii]
TraesCS5A02G292000	[I]	Lipid transport and metabolism	Molecular Function: diacylglycerol O-acyltransferase activity (GO:0004144);; Cellular Component: plastoglobule (GO:0010287);; Biological Process: phytol metabolic process (GO:0033306);;	--	--	Acyltransferase-like protein At1g54570, chloroplastic OS=Arabidopsis thaliana OX=3702 GN=At1g54570 PE=1 SV=1	acyltransferase-like protein At1g54570, chloroplastic isoform X2 [Aegilops tauschii subsp. tauschii]
TraesCS3A02G402700	--	--	--	--	--	--	uncharacterized protein LOC109765380 [Aegilops tauschii subsp. tauschii]
TraesCS2B02G235700	--	--	Biological Process: metabolic process (GO:0008152);; Cellular Component: integral component of membrane (GO:0016021);; Molecular Function: transferase activity, transferring acyl groups other than amino-acyl groups (GO:0016747);;	--	--	Protein PLANT CADMIUM RESISTANCE 8 OS=Arabidopsis thaliana OX=3702 GN=PCR8 PE=1 SV=2	uncharacterized protein LOC109787465 [Aegilops tauschii subsp. tauschii]
Triticum_aestivum_newGene_30934	--	--	--	--	--	--	hypothetical protein TRIUR3_34938 [Triticum urartu]
Triticum_aestivum_newGene_80598	--	--	Cellular Component: integral component of membrane (GO:0016021);; Molecular Function: alliin lyase activity (GO:0047654);;	--	--	Tryptophan aminotransferase-related protein 4 OS=Arabidopsis thaliana OX=3702 GN=TAR4 PE=2 SV=2	tryptophan aminotransferase related 3 [Triticum aestivum]
TraesCS1B02G203300	--	--	Molecular Function: DNA binding (GO:0003677);;	--	--	Trihelix transcription factor GT-2 OS=Arabidopsis thaliana OX=3702 GN=GT-2 PE=2 SV=1	trihelix transcription factor GTL1-like isoform X1 [Aegilops tauschii subsp. tauschii]
Triticum_aestivum_newGene_24472	--	--	Cellular Component: integral component of membrane (GO:0016021);;	--	--	--	Diacylglycerol kinase [Triticum urartu]
TraesCS5B02G404600	[O]	Posttranslational modification, protein turnover, chaperones	Molecular Function: serine-type endopeptidase activity (GO:0004252);; Cellular Component: cell wall (GO:0005618);; Biological Process: proteolysis (GO:0006508);;	--	--	Subtilisin-like protease SBT1.7 OS=Arabidopsis thaliana OX=3702 GN=SBT1.7 PE=1 SV=1	subtilisin-like protease SBT1.7 [Aegilops tauschii subsp. tauschii]
Triticum_aestivum_newGene_56011	--	--	Molecular Function: DNA binding (GO:0003677);; Molecular Function: RNA binding (GO:0003723);; Molecular Function: RNA-directed DNA polymerase activity (GO:0003964);; Cellular Component: mitochondrion (GO:0005739);; Biological Process: RNA-dependent DNA biosynthetic process (GO:0006278);; Biological Process: DNA recombination (GO:0006310);; Molecular Function: zinc ion binding (GO:0008270);; Cellu…	--	--	--	putative gag-pol polyprotein [Triticum monococcum subsp. aegilopoides]
Triticum_aestivum_newGene_5827	--	--	--	--	--	Plant intracellular Ras-group-related LRR protein 5 OS=Oryza sativa subsp. japonica OX=39947 GN=IRL5 PE=2 SV=1	plant intracellular Ras-group-related LRR protein 5-like [Aegilops tauschii subsp. tauschii]
TraesCS1D02G249600	[G]	Carbohydrate transport and metabolism	Biological Process: polysaccharide catabolic process (GO:0000272);; Molecular Function: chitinase activity (GO:0004568);; Biological Process: chitin catabolic process (GO:0006032);; Molecular Function: chitin binding (GO:0008061);; Biological Process: cell wall macromolecule catabolic process (GO:0016998);; Biological Process: defense response to fungus (GO:0050832);;	K20547|6.06649e-149|osa:4338718|K20547 basic endochitinase B [EC:3.2.1.14] | (RefSeq) Cht-2, Cht2, OsChia1b, OsJ_18467, RC7, chitinase; chitinase 2	Amino sugar and nucleotide sugar metabolism (ko00520)	Chitinase 2 OS=Oryza sativa subsp. japonica OX=39947 GN=Cht2 PE=1 SV=1	chitinase 2-like [Aegilops tauschii subsp. tauschii]
TraesCS2A02G584328	--	--	Biological Process: amino acid transmembrane transport (GO:0003333);; Cellular Component: plasma membrane (GO:0005886);; Cellular Component: plastid (GO:0009536);; Molecular Function: amino acid transmembrane transporter activity (GO:0015171);; Cellular Component: integral component of membrane (GO:0016021);; Biological Process: amino acid import (GO:0043090);;	--	--	Lysine histidine transporter 2 OS=Arabidopsis thaliana OX=3702 GN=LHT2 PE=1 SV=1	lysine histidine transporter-like 2 [Aegilops tauschii subsp. tauschii]
TraesCS2B02G259800	--	--	--	--	--	--	uncharacterized protein LOC109757906 [Aegilops tauschii subsp. tauschii]
TraesCS2B02G499600	[O]	Posttranslational modification, protein turnover, chaperones	Molecular Function: ATP binding (GO:0005524);; Molecular Function: peptidase activity (GO:0008233);; Cellular Component: proteasome regulatory particle, base subcomplex (GO:0008540);; Molecular Function: TBP-class protein binding (GO:0017025);; Biological Process: ubiquitin-dependent ERAD pathway (GO:0030433);; Cellular Component: nuclear proteasome complex (GO:0031595);; Cellular Component: cyto…	K03063|0|bdi:100839111|K03063 26S proteasome regulatory subunit T3 | (RefSeq) 26S protease regulatory subunit 6B homolog	Proteasome (ko03050)	26S proteasome regulatory subunit 6B homolog OS=Arabidopsis thaliana OX=3702 GN=RPT3 PE=1 SV=1	26S protease regulatory subunit 6B homolog [Aegilops tauschii subsp. tauschii]
TraesCSU02G172500	--	--	Cellular Component: nucleus (GO:0005634);; Cellular Component: cytoplasm (GO:0005737);; Molecular Function: ligase activity (GO:0016874);;	--	--	U-box domain-containing protein 4 OS=Arabidopsis thaliana OX=3702 GN=PUB4 PE=1 SV=3	ubiquitin-protein ligase, expressed [Triticum aestivum]
Triticum_aestivum_newGene_86969	--	--	--	--	--	--	hypothetical protein TRIUR3_31327 [Triticum urartu]
Triticum_aestivum_newGene_68086	--	--	--	--	--	--	hypothetical protein TRIUR3_10557 [Triticum urartu]
TraesCS2B02G426500	[O]	Posttranslational modification, protein turnover, chaperones	Cellular Component: cytoplasm (GO:0005737);;	K08770|2.10422e-104|egu:105052645|K08770 ubiquitin C | (RefSeq) ubiquitin	--	Polyubiquitin (Fragment) OS=Hordeum vulgare OX=4513 PE=2 SV=1	PREDICTED: polyubiquitin isoform X1 [Musa acuminata subsp. malaccensis]
TraesCS5A02G511100	[QV]	Secondary metabolites biosynthesis, transport and catabolism;; Defense mechanisms	Molecular Function: monooxygenase activity (GO:0004497);; Molecular Function: iron ion binding (GO:0005506);; Cellular Component: integral component of membrane (GO:0016021);; Molecular Function: oxidoreductase activity, acting on paired donors, with incorporation or reduction of molecular oxygen (GO:0016705);; Molecular Function: heme binding (GO:0020037);; Biological Process: oxidation-reductio…	--	--	Noroxomaritidine synthase OS=Narcissus aff. pseudonarcissus MK-2014 OX=1540222 GN=Cyp96T1 PE=1 SV=1	cytochrome P450 86B1-like [Aegilops tauschii subsp. tauschii]
TraesCS6A02G333700	--	--	--	--	--	--	uncharacterized protein LOC109750105 [Aegilops tauschii subsp. tauschii]
Triticum_aestivum_newGene_76745	--	--	--	--	--	--	hypothetical protein TRIUR3_06504 [Triticum urartu]
TraesCS3D02G367000	--	--	--	--	--	--	uncharacterized protein LOC109743897 [Aegilops tauschii subsp. tauschii]
TraesCS3A02G506400	[M]	Cell wall/membrane/envelope biogenesis	Molecular Function: catalytic activity (GO:0003824);; Molecular Function: coenzyme binding (GO:0050662);;	--	--	3-oxo-Delta(4,5)-steroid 5-beta-reductase OS=Digitalis lanata OX=49450 PE=1 SV=1	3-oxo-Delta(4,5)-steroid 5-beta-reductase-like [Aegilops tauschii subsp. tauschii]
TraesCS3B02G314300	--	--	Cellular Component: endosome (GO:0005768);; Cellular Component: trans-Golgi network (GO:0005802);;	--	--	BURP domain-containing protein 3 OS=Oryza sativa subsp. japonica OX=39947 GN=BURP3 PE=2 SV=1	unnamed protein product [Triticum aestivum]
TraesCS6D02G128300	--	--	--	--	--	F-box protein At3g07870 OS=Arabidopsis thaliana OX=3702 GN=At3g07870 PE=2 SV=1	F-box protein At3g07870-like isoform X1 [Aegilops tauschii subsp. tauschii]
TraesCS3D02G535900	[J]	Translation, ribosomal structure and biogenesis	Molecular Function: structural constituent of ribosome (GO:0003735);; Biological Process: rRNA export from nucleus (GO:0006407);; Biological Process: translation (GO:0006412);; Cellular Component: cytosolic small ribosomal subunit (GO:0022627);;	K02979|2.99764e-30|dosa:Os10t0411700-01|K02979 small subunit ribosomal protein S28e | (RAP-DB) Os10g0411700; Similar to S28 ribosomal protein (Fragment).	Ribosome (ko03010)	40S ribosomal protein S28 OS=Zea mays OX=4577 GN=RPS28 PE=3 SV=1	Os10g0411700, partial [Oryza sativa Japonica Group]
TraesCS3B02G045200	[K]	Transcription	Cellular Component: integral component of membrane (GO:0016021);;	--	--	LRR receptor-like serine/threonine-protein kinase FLS2 OS=Arabidopsis thaliana OX=3702 GN=FLS2 PE=1 SV=1	unnamed protein product [Triticum aestivum]
Triticum_aestivum_newGene_69258	[V]	Defense mechanisms	Cellular Component: plant-type vacuole (GO:0000325);; Molecular Function: ATP binding (GO:0005524);; Cellular Component: vacuolar membrane (GO:0005774);; Biological Process: response to aluminum ion (GO:0010044);; Cellular Component: integral component of membrane (GO:0016021);; Molecular Function: ATPase activity, coupled to transmembrane movement of substances (GO:0042626);; Biological Process:…	--	--	ABC transporter B family member 25 OS=Oryza sativa subsp. japonica OX=39947 GN=OsABCB25 PE=2 SV=1	ABC transporter B family member 27 [Zea mays]
TraesCS4D02G176200	--	--	Molecular Function: magnesium ion binding (GO:0000287);; Molecular Function: phospholipid-translocating ATPase activity (GO:0004012);; Molecular Function: ATP binding (GO:0005524);; Cellular Component: plasma membrane (GO:0005886);; Cellular Component: integral component of membrane (GO:0016021);; Biological Process: phospholipid translocation (GO:0045332);;	K14802|0|obr:102710681|K14802 phospholipid-transporting ATPase [EC:3.6.3.1] | (RefSeq) phospholipid-transporting ATPase 1-like	--	Phospholipid-transporting ATPase 1 OS=Arabidopsis thaliana OX=3702 GN=ALA1 PE=2 SV=1	phospholipid-transporting ATPase 1-like isoform X1 [Aegilops tauschii subsp. tauschii]
Triticum_aestivum_newGene_55578	[IQR]	Lipid transport and metabolism;; Secondary metabolites biosynthesis, transport and catabolism;; General function prediction only	Cellular Component: mitochondrion (GO:0005739);;	--	--	Short-chain dehydrogenase TIC 32, chloroplastic OS=Pisum sativum OX=3888 GN=TIC32 PE=1 SV=1	short-chain dehydrogenase TIC 32, chloroplastic-like isoform X1 [Aegilops tauschii subsp. tauschii]
TraesCS3B02G043600	[M]	Cell wall/membrane/envelope biogenesis	Molecular Function: protein serine/threonine kinase activity (GO:0004674);; Molecular Function: ATP binding (GO:0005524);; Cellular Component: plasma membrane (GO:0005886);; Biological Process: protein phosphorylation (GO:0006468);; Biological Process: defense response (GO:0006952);; Cellular Component: plasmodesma (GO:0009506);; Cellular Component: integral component of membrane (GO:0016021);;	--	--	Cysteine-rich receptor-like protein kinase 10 OS=Arabidopsis thaliana OX=3702 GN=CRK10 PE=1 SV=3	unnamed protein product [Triticum aestivum]
Triticum_aestivum_newGene_62133	--	--	Molecular Function: transcription factor activity, sequence-specific DNA binding (GO:0003700);; Molecular Function: heme oxygenase (decyclizing) activity (GO:0004392);; Biological Process: heme oxidation (GO:0006788);; Cellular Component: chloroplast (GO:0009507);; Biological Process: inflorescence development (GO:0010229);; Biological Process: photosynthesis (GO:0015979);; Cellular Component: in…	K00510|1.93634e-73|bdi:100841507|K00510 heme oxygenase (biliverdin-producing) [EC:1.14.14.18] | (RefSeq) heme oxygenase 1, chloroplastic	Porphyrin and chlorophyll metabolism (ko00860)	Heme oxygenase 1, chloroplastic OS=Oryza sativa subsp. japonica OX=39947 GN=HO1 PE=2 SV=1	heme oxygenase 1 [Triticum aestivum]
TraesCS5D02G484400	--	--	Molecular Function: calcium ion binding (GO:0005509);; Molecular Function: calcium-dependent phospholipid binding (GO:0005544);; Cellular Component: plasma membrane (GO:0005886);; Cellular Component: integral component of membrane (GO:0016021);; Molecular Function: transferase activity, transferring glycosyl groups (GO:0016757);;	--	--	Protein QUIRKY OS=Arabidopsis thaliana OX=3702 GN=QKY PE=2 SV=1	protein QUIRKY [Aegilops tauschii subsp. tauschii]
TraesCS2B02G372700	--	--	Molecular Function: calcium ion binding (GO:0005509);; Cellular Component: chloroplast thylakoid (GO:0009534);; Cellular Component: chloroplast stroma (GO:0009570);; Cellular Component: photosystem II oxygen evolving complex (GO:0009654);; Biological Process: photosynthesis (GO:0015979);; Cellular Component: extrinsic component of membrane (GO:0019898);; Cellular Component: thylakoid lumen (GO:00…	--	--	PsbP domain-containing protein 4, chloroplastic OS=Arabidopsis thaliana OX=3702 GN=PPD4 PE=1 SV=2	psbP domain-containing protein 4, chloroplastic isoform X1 [Aegilops tauschii subsp. tauschii]
TraesCSU02G100500	[Q]	Secondary metabolites biosynthesis, transport and catabolism	Biological Process: suberin biosynthetic process (GO:0010345);; Cellular Component: membrane (GO:0016020);; Biological Process: long-chain fatty-acyl-CoA metabolic process (GO:0035336);; Cellular Component: intracellular membrane-bounded organelle (GO:0043231);; Biological Process: oxidation-reduction process (GO:0055114);; Molecular Function: fatty-acyl-CoA reductase (alcohol-forming) activity (…	K13356|0|osa:4335562|K13356 alcohol-forming fatty acyl-CoA reductase [EC:1.2.1.84] | (RefSeq) fatty acyl-CoA reductase 1	Cutin, suberine and wax biosynthesis (ko00073);; Peroxisome (ko04146)	Fatty acyl-CoA reductase 1 OS=Arabidopsis thaliana OX=3702 GN=FAR1 PE=1 SV=1	Fatty acyl-CoA reductase 3 [Triticum urartu]
Triticum_aestivum_newGene_8625	[E]	Amino acid transport and metabolism	Molecular Function: glutamate dehydrogenase [NAD(P)+] activity (GO:0004353);; Biological Process: cellular amino acid metabolic process (GO:0006520);; Biological Process: oxidation-reduction process (GO:0055114);;	K00261|5.49185e-70|osa:4334405|K00261 glutamate dehydrogenase (NAD(P)+) [EC:1.4.1.3] | (RefSeq) GDH1; glutamate dehydrogenase	Arginine biosynthesis (ko00220);; Alanine, aspartate and glutamate metabolism (ko00250);; Nitrogen metabolism (ko00910);; Carbon metabolism (ko01200)	Glutamate dehydrogenase 1, mitochondrial OS=Oryza sativa subsp. japonica OX=39947 GN=GDH1 PE=2 SV=1	hypothetical protein TRIUR3_30567 [Triticum urartu]
TraesCS7D02G094900	[IR]	Lipid transport and metabolism;; General function prediction only	Molecular Function: hydrolase activity, acting on ester bonds (GO:0016788);;	--	--	GDSL esterase/lipase APG OS=Arabidopsis thaliana OX=3702 GN=APG PE=2 SV=1	GDSL esterase/lipase APG-like [Aegilops tauschii subsp. tauschii]
TraesCS7A02G172500	[I]	Lipid transport and metabolism	Biological Process: metabolic process (GO:0008152);; Molecular Function: hydrolase activity (GO:0016787);;	--	--	Tuliposide A-converting enzyme 1, chloroplastic OS=Tulipa gesneriana OX=13306 GN=TCEA1 PE=1 SV=1	probable carboxylesterase 12 [Aegilops tauschii subsp. tauschii]
TraesCS3B02G045300	[K]	Transcription	Cellular Component: integral component of membrane (GO:0016021);;	--	--	Receptor-like protein 9DC3 OS=Solanum pimpinellifolium OX=4084 GN=9DC3 PE=3 SV=1	unnamed protein product [Triticum aestivum]
TraesCS1D02G184500	[E]	Amino acid transport and metabolism	Cellular Component: cytosol (GO:0005829);; Molecular Function: methionine gamma-lyase activity (GO:0018826);; Molecular Function: pyridoxal phosphate binding (GO:0030170);; Biological Process: protein homotetramerization (GO:0051289);;	K01761|0|bdi:100831152|K01761 methionine-gamma-lyase [EC:4.4.1.11] | (RefSeq) methionine gamma-lyase	Cysteine and methionine metabolism (ko00270);; Selenocompound metabolism (ko00450)	Methionine gamma-lyase OS=Arabidopsis thaliana OX=3702 GN=MGL PE=1 SV=1	methionine gamma-lyase [Aegilops tauschii subsp. tauschii]
TraesCS3D02G188800	[L]	Replication, recombination and repair	Molecular Function: DNA binding (GO:0003677);; Molecular Function: DNA topoisomerase type II (ATP-hydrolyzing) activity (GO:0003918);; Molecular Function: ATP binding (GO:0005524);; Cellular Component: chromosome (GO:0005694);; Cellular Component: mitochondrion (GO:0005739);; Biological Process: DNA topological change (GO:0006265);; Biological Process: DNA unwinding involved in DNA replication (G…	K02470|0|bdi:100826125|K02470 DNA gyrase subunit B [EC:5.99.1.3] | (RefSeq) DNA gyrase subunit B, chloroplastic/mitochondrial	--	DNA gyrase subunit B, chloroplastic/mitochondrial OS=Oryza sativa subsp. japonica OX=39947 GN=GYRB PE=2 SV=1	DNA gyrase subunit B, chloroplastic/mitochondrial [Aegilops tauschii subsp. tauschii]
TraesCS2D02G096500	--	--	--	K09602|2.57383e-57|sbi:SORBI_04g001071|K09602 ubiquitin thioesterase protein OTUB1 [EC:3.4.19.12] | (RefSeq) SORBIDRAFT_04g001071, Sb04g001071; hypothetical protein	--	Ubiquitin thioesterase otubain-like OS=Arabidopsis thaliana OX=3702 GN=At1g28120 PE=2 SV=2	ubiquitin thioesterase otubain-like [Aegilops tauschii subsp. tauschii]
TraesCS2B02G351500	--	--	Cellular Component: mitochondrion (GO:0005739);; Cellular Component: chloroplast (GO:0009507);;	--	--	Protein DCL homolog, chloroplastic OS=Arabidopsis thaliana OX=3702 GN=DCL PE=2 SV=1	protein DCL, chloroplastic-like [Aegilops tauschii subsp. tauschii]
TraesCS1B02G308900	[E]	Amino acid transport and metabolism	Cellular Component: mitochondrion (GO:0005739);; Molecular Function: alanine-glyoxylate transaminase activity (GO:0008453);; Molecular Function: pyridoxal phosphate binding (GO:0030170);; Molecular Function: identical protein binding (GO:0042802);;	K00827|0|bdi:100824380|K00827 alanine-glyoxylate transaminase / (R)-3-amino-2-methylpropionate-pyruvate transaminase [EC:2.6.1.44 2.6.1.40] | (RefSeq) alanine--glyoxylate aminotransferase 2 homolog 3, mitochondrial-like	Alanine, aspartate and glutamate metabolism (ko00250);; Glycine, serine and threonine metabolism (ko00260);; Cysteine and methionine metabolism (ko00270);; Valine, leucine and isoleucine degradation (ko00280)	Alanine--glyoxylate aminotransferase 2 homolog 3, mitochondrial OS=Arabidopsis thaliana OX=3702 GN=At3g08860 PE=2 SV=1	alanine--glyoxylate aminotransferase 2 homolog 3, mitochondrial-like [Aegilops tauschii subsp. tauschii]
Triticum_aestivum_newGene_72018	[H]	Coenzyme transport and metabolism	Biological Process: ubiquinone biosynthetic process (GO:0006744);; Molecular Function: 2-polyprenyl-6-methoxy-1,4-benzoquinone methyltransferase activity (GO:0008425);; Cellular Component: extrinsic component of mitochondrial inner membrane (GO:0031314);; Biological Process: methylation (GO:0032259);; Molecular Function: 2-octaprenyl-6-methoxy-1,4-benzoquinone methylase activity (GO:0102005);;	K06127|0|bdi:100845887|K06127 2-methoxy-6-polyprenyl-1,4-benzoquinol methylase [EC:2.1.1.201] | (RefSeq) 2-methoxy-6-polyprenyl-1,4-benzoquinol methylase, mitochondrial	Ubiquinone and other terpenoid-quinone biosynthesis (ko00130)	2-methoxy-6-polyprenyl-1,4-benzoquinol methylase, mitochondrial OS=Oryza sativa subsp. japonica OX=39947 GN=COQ5 PE=2 SV=1	2-methoxy-6-polyprenyl-1,4-benzoquinol methylase, mitochondrial [Aegilops tauschii subsp. tauschii]
TraesCS4A02G389400	[K]	Transcription	Molecular Function: kinase activity (GO:0016301);; Biological Process: phosphorylation (GO:0016310);; Molecular Function: purine ribonucleoside binding (GO:0032550);; Molecular Function: adenyl ribonucleotide binding (GO:0032559);; Molecular Function: anion binding (GO:0043168);;	--	--	Disease resistance protein TAO1 OS=Arabidopsis thaliana OX=3702 GN=TAO1 PE=4 SV=1	Cysteine-rich receptor-like protein kinase 26 [Triticum urartu]
TraesCS5D02G265700	--	--	Cellular Component: cytoplasm (GO:0005737);; Biological Process: flavonoid biosynthetic process (GO:0009813);; Cellular Component: intracellular membrane-bounded organelle (GO:0043231);; Biological Process: flavonoid glucuronidation (GO:0052696);; Molecular Function: quercetin 3-O-glucosyltransferase activity (GO:0080043);; Molecular Function: quercetin 7-O-glucosyltransferase activity (GO:008004…	K13030|0|bdi:100843904|K13030 cyanohydrin beta-glucosyltransferase [EC:2.4.1.85] | (RefSeq) cyanohydrin beta-glucosyltransferase-like	Cyanoamino acid metabolism (ko00460)	Cyanohydrin beta-glucosyltransferase OS=Sorghum bicolor OX=4558 GN=UGT85B1 PE=1 SV=1	cyanohydrin beta-glucosyltransferase-like [Aegilops tauschii subsp. tauschii]
Triticum_aestivum_newGene_70001	--	--	--	--	--	AUGMIN subunit 7 OS=Arabidopsis thaliana OX=3702 GN=AUG7 PE=1 SV=1	uncharacterized protein LOC109761654 isoform X1 [Aegilops tauschii subsp. tauschii]
TraesCS2D02G406900	--	--	Molecular Function: hydrolase activity, acting on ester bonds (GO:0016788);; Molecular Function: protein dimerization activity (GO:0046983);;	--	--	Anthocyanin regulatory R-S protein OS=Zea mays OX=4577 GN=R-S PE=2 SV=1	anthocyanin regulatory R-S protein-like [Aegilops tauschii subsp. tauschii]
TraesCS3D02G338400	--	--	Cellular Component: extracellular region (GO:0005576);; Cellular Component: cell wall (GO:0005618);; Biological Process: plant-type cell wall organization (GO:0009664);; Cellular Component: membrane (GO:0016020);;	--	--	Expansin-A2 OS=Oryza sativa subsp. japonica OX=39947 GN=EXPA2 PE=2 SV=2	expansin-A2 [Aegilops tauschii subsp. tauschii]
TraesCS4D02G227300	--	--	Biological Process: flavonoid biosynthetic process (GO:0009813);; Cellular Component: intracellular membrane-bounded organelle (GO:0043231);; Biological Process: flavonoid glucuronidation (GO:0052696);; Molecular Function: quercetin 3-O-glucosyltransferase activity (GO:0080043);; Molecular Function: quercetin 7-O-glucosyltransferase activity (GO:0080044);;	--	--	UDP-glycosyltransferase 83A1 OS=Arabidopsis thaliana OX=3702 GN=UGT83A1 PE=2 SV=1	UDP-glycosyltransferase 83A1-like [Aegilops tauschii subsp. tauschii]
Triticum_aestivum_newGene_88751	--	--	--	--	--	IQ domain-containing protein IQM2 OS=Arabidopsis thaliana OX=3702 GN=IQM2 PE=2 SV=1	uncharacterized protein LOC109753120 [Aegilops tauschii subsp. tauschii]
Triticum_aestivum_newGene_30811	--	--	Molecular Function: DNA binding (GO:0003677);; Molecular Function: aspartic-type endopeptidase activity (GO:0004190);; Biological Process: proteolysis (GO:0006508);; Biological Process: protein catabolic process (GO:0030163);;	--	--	Aspartyl protease family protein At5g10770 OS=Arabidopsis thaliana OX=3702 GN=At5g10770 PE=2 SV=1	aspartyl protease family protein At5g10770-like [Aegilops tauschii subsp. tauschii]
Triticum_aestivum_newGene_71920	--	--	Molecular Function: DNA binding (GO:0003677);; Cellular Component: mitochondrion (GO:0005739);; Biological Process: DNA recombination (GO:0006310);; Molecular Function: electron carrier activity (GO:0009055);; Cellular Component: plastid (GO:0009536);; Biological Process: DNA integration (GO:0015074);; Cellular Component: integral component of membrane (GO:0016021);; Biological Process: electron …	--	--	Retrovirus-related Pol polyprotein from transposon RE1 OS=Arabidopsis thaliana OX=3702 GN=RE1 PE=2 SV=1	Os08g0544300 [Oryza sativa Japonica Group]
TraesCS4A02G061700	[C]	Energy production and conversion	Cellular Component: cell wall (GO:0005618);; Cellular Component: cytosol (GO:0005829);; Cellular Component: plasma membrane (GO:0005886);; Cellular Component: plasmodesma (GO:0009506);; Biological Process: oxygen transport (GO:0015671);; Molecular Function: oxygen binding (GO:0019825);; Molecular Function: heme binding (GO:0020037);; Molecular Function: metal ion binding (GO:0046872);;	--	--	Non-symbiotic hemoglobin OS=Hordeum vulgare OX=4513 GN=HB PE=1 SV=1	hemoglobin 1 [Triticum aestivum]
TraesCS4B02G064300	--	--	--	--	--	--	uncharacterized protein LOC109776754 [Aegilops tauschii subsp. tauschii]
TraesCS5B02G080800	--	--	--	--	--	--	uncharacterized protein LOC109769396 [Aegilops tauschii subsp. tauschii]
Triticum_aestivum_newGene_97773	--	--	Molecular Function: nucleic acid binding (GO:0003676);; Molecular Function: zinc ion binding (GO:0008270);; Cellular Component: plastid (GO:0009536);; Biological Process: DNA integration (GO:0015074);;	--	--	Retrovirus-related Pol polyprotein from transposon RE2 OS=Arabidopsis thaliana OX=3702 GN=RE2 PE=4 SV=1	hypothetical protein M3S_J82 [Sorghum bicolor]
TraesCS5B02G202800	[G]	Carbohydrate transport and metabolism	Molecular Function: zinc ion binding (GO:0008270);; Cellular Component: plastid (GO:0009536);; Biological Process: lignin biosynthetic process (GO:0009809);; Molecular Function: cinnamyl-alcohol dehydrogenase activity (GO:0045551);; Molecular Function: sinapyl alcohol dehydrogenase activity (GO:0052747);; Biological Process: oxidation-reduction process (GO:0055114);;	K00083|0|bdi:100828033|K00083 cinnamyl-alcohol dehydrogenase [EC:1.1.1.195] | (RefSeq) probable cinnamyl alcohol dehydrogenase 8D	Phenylpropanoid biosynthesis (ko00940)	Probable cinnamyl alcohol dehydrogenase 8B OS=Oryza sativa subsp. japonica OX=39947 GN=CAD8B PE=3 SV=2	probable cinnamyl alcohol dehydrogenase 8C [Aegilops tauschii subsp. tauschii]
TraesCS2A02G153300	[H]	Coenzyme transport and metabolism	Biological Process: metabolic process (GO:0008152);; Molecular Function: hydrolase activity (GO:0016787);;	--	--	--	Uncharacterized protein C24B11.05 [Triticum urartu]
TraesCS5B02G350700	[P]	Inorganic ion transport and metabolism	Molecular Function: N,N-dimethylaniline monooxygenase activity (GO:0004499);; Molecular Function: flavin adenine dinucleotide binding (GO:0050660);; Molecular Function: NADP binding (GO:0050661);; Biological Process: oxidation-reduction process (GO:0055114);;	--	--	Probable flavin-containing monooxygenase 1 OS=Arabidopsis thaliana OX=3702 GN=FMO1 PE=2 SV=1	probable flavin-containing monooxygenase 1 [Aegilops tauschii subsp. tauschii]
Triticum_aestivum_newGene_69478	--	--	Molecular Function: core promoter sequence-specific DNA binding (GO:0001046);; Molecular Function: transcriptional activator activity, RNA polymerase II transcription regulatory region sequence-specific binding (GO:0001228);; Cellular Component: nucleus (GO:0005634);; Biological Process: transcription from RNA polymerase II promoter (GO:0006366);;	--	--	Transcription factor bHLH80 OS=Arabidopsis thaliana OX=3702 GN=BHLH80 PE=2 SV=1	predicted protein [Hordeum vulgare subsp. vulgare]
TraesCS5D02G210900	--	--	Molecular Function: DNA binding (GO:0003677);;	K09422|4.27192e-120|bdi:100828336|K09422 myb proto-oncogene protein, plant | (RefSeq) protein ODORANT1-like	--	Transcription factor MYB20 OS=Arabidopsis thaliana OX=3702 GN=MYB20 PE=2 SV=1	protein ODORANT1-like [Aegilops tauschii subsp. tauschii]
TraesCS5D02G507100	[HR]	Coenzyme transport and metabolism;; General function prediction only	Molecular Function: hydrolase activity (GO:0016787);;	--	--	--	uncharacterized protein LOC109775380 [Aegilops tauschii subsp. tauschii]
Triticum_aestivum_newGene_5875	--	--	--	--	--	--	uncharacterized protein LOC109772688 [Aegilops tauschii subsp. tauschii]
Triticum_aestivum_newGene_23068	--	--	Cellular Component: integral component of membrane (GO:0016021);;	--	--	--	ALA-interacting subunit 3 [Triticum urartu]
TraesCS4B02G286300	[J]	Translation, ribosomal structure and biogenesis	Molecular Function: structural constituent of ribosome (GO:0003735);; Cellular Component: ribosome (GO:0005840);; Biological Process: translation (GO:0006412);; Molecular Function: 5S rRNA binding (GO:0008097);; Cellular Component: plastid (GO:0009536);;	--	--	50S ribosomal protein L18, chloroplastic OS=Oryza sativa subsp. japonica OX=39947 GN=RPL18 PE=2 SV=1	uncharacterized protein LOC109738122 isoform X2 [Aegilops tauschii subsp. tauschii]
TraesCS6A02G235600	--	--	--	--	--	CBS domain-containing protein CBSX5 OS=Arabidopsis thaliana OX=3702 GN=CBSX5 PE=2 SV=2	CBS domain-containing protein CBSX5 [Triticum urartu]
TraesCS6A02G413300	[H]	Coenzyme transport and metabolism	Molecular Function: polyprenyltransferase activity (GO:0002094);; Biological Process: ubiquinone biosynthetic process (GO:0006744);; Biological Process: isoprenoid biosynthetic process (GO:0008299);; Cellular Component: integral component of mitochondrial inner membrane (GO:0031305);;	K06125|0|bdi:100839928|K06125 4-hydroxybenzoate polyprenyltransferase [EC:2.5.1.39] | (RefSeq) 4-hydroxybenzoate polyprenyltransferase, mitochondrial	Ubiquinone and other terpenoid-quinone biosynthesis (ko00130)	4-hydroxybenzoate polyprenyltransferase, mitochondrial OS=Arabidopsis thaliana OX=3702 GN=PPT1 PE=2 SV=1	4-hydroxybenzoate polyprenyltransferase, mitochondrial-like [Aegilops tauschii subsp. tauschii]
TraesCS2D02G174500	[M]	Cell wall/membrane/envelope biogenesis	Molecular Function: protein kinase activity (GO:0004672);; Molecular Function: ATP binding (GO:0005524);; Biological Process: protein phosphorylation (GO:0006468);; Cellular Component: integral component of membrane (GO:0016021);;	--	--	Protein STRUBBELIG-RECEPTOR FAMILY 7 OS=Arabidopsis thaliana OX=3702 GN=SRF7 PE=1 SV=1	protein STRUBBELIG-RECEPTOR FAMILY 7-like [Aegilops tauschii subsp. tauschii]
TraesCS1D02G000500	--	--	Cellular Component: integral component of membrane (GO:0016021);;	--	--	--	uncharacterized protein LOC109767862 [Aegilops tauschii subsp. tauschii]
TraesCS2D02G101300	--	--	Molecular Function: DNA binding (GO:0003677);; Cellular Component: nucleus (GO:0005634);; Biological Process: regulation of transcription, DNA-templated (GO:0006355);;	--	--	NAC domain-containing protein 10 OS=Oryza sativa subsp. japonica OX=39947 GN=NAC010 PE=2 SV=1	NAC transcription factor NAM-B1-like [Aegilops tauschii subsp. tauschii]
TraesCS2A02G226500	[L]	Replication, recombination and repair	Molecular Function: DNA binding (GO:0003677);; Molecular Function: ATP-dependent DNA helicase activity (GO:0004003);; Molecular Function: ATP binding (GO:0005524);; Cellular Component: plastid (GO:0009536);; Biological Process: DNA duplex unwinding (GO:0032508);;	--	--	ATP-dependent DNA helicase SRS2-like protein At4g25120 OS=Arabidopsis thaliana OX=3702 GN=SRS2 PE=1 SV=1	ATP-dependent DNA helicase SRS2-like protein At4g25120 [Aegilops tauschii subsp. tauschii]
TraesCS7B02G353600	--	--	Cellular Component: mitochondrion (GO:0005739);;	--	--	--	uncharacterized protein LOC109768958 [Aegilops tauschii subsp. tauschii]
TraesCS6B02G157400	--	--	Molecular Function: ubiquitin-protein transferase activity (GO:0004842);; Biological Process: protein ubiquitination (GO:0016567);; Cellular Component: Cul3-RING ubiquitin ligase complex (GO:0031463);;	--	--	F-box/kelch-repeat protein OR23 OS=Arabidopsis thaliana OX=3702 GN=OR23 PE=2 SV=1	F-box/kelch-repeat protein OR23 [Triticum aestivum]
Triticum_aestivum_newGene_5782	--	--	--	--	--	--	hypothetical protein TRIUR3_34368 [Triticum urartu]
TraesCS1D02G094700	[O]	Posttranslational modification, protein turnover, chaperones	Molecular Function: glutathione transferase activity (GO:0004364);; Cellular Component: cytoplasm (GO:0005737);; Biological Process: glutathione metabolic process (GO:0006749);;	K00799|2.49965e-114|bdi:100835322|K00799 glutathione S-transferase [EC:2.5.1.18] | (RefSeq) glutathione S-transferase 4-like	Glutathione metabolism (ko00480)	Glutathione S-transferase 4 OS=Zea mays OX=4577 GN=GST4 PE=1 SV=2	glutathione S-transferase 4-like [Aegilops tauschii subsp. tauschii]
TraesCS2B02G525800	--	--	--	--	--	Protein HEAT INTOLERANT 4 OS=Arabidopsis thaliana OX=3702 GN=HIT4 PE=1 SV=1	uncharacterized protein LOC109752220 [Aegilops tauschii subsp. tauschii]
TraesCS3D02G494400	[HC]	Coenzyme transport and metabolism;; Energy production and conversion	Cellular Component: chloroplast (GO:0009507);; Molecular Function: oxidoreductase activity (GO:0016491);; Biological Process: oxidation-reduction process (GO:0055114);;	--	--	--	uncharacterized protein LOC109765826 [Aegilops tauschii subsp. tauschii]
TraesCS5A02G305100	[G]	Carbohydrate transport and metabolism	Biological Process: flavonoid biosynthetic process (GO:0009813);; Cellular Component: intracellular membrane-bounded organelle (GO:0043231);; Biological Process: flavonoid glucuronidation (GO:0052696);; Molecular Function: quercetin 3-O-glucosyltransferase activity (GO:0080043);; Molecular Function: quercetin 7-O-glucosyltransferase activity (GO:0080044);;	K13691|0|bdi:100835161|K13691 pathogen-inducible salicylic acid glucosyltransferase [EC:2.4.1.-] | (RefSeq) crocetin glucosyltransferase 2-like	--	UDP-glucosyltransferase UGT13248 OS=Hordeum vulgare subsp. vulgare OX=112509 PE=2 SV=1	UDP-glycosyltransferase 74E1-like [Aegilops tauschii subsp. tauschii]
TraesCS4B02G023500	--	--	--	--	--	--	hypothetical protein TRIUR3_24332 [Triticum urartu]
TraesCS4A02G384300	[MDT]	Cell wall/membrane/envelope biogenesis;; Cell cycle control, cell division, chromosome partitioning;; Signal transduction mechanisms	Molecular Function: ATP binding (GO:0005524);; Cellular Component: integral component of membrane (GO:0016021);;	--	--	AAA-ATPase ASD, mitochondrial OS=Arabidopsis thaliana OX=3702 GN=AATP1 PE=1 SV=1	ATPase 2 [Hordeum vulgare subsp. vulgare]
TraesCS3A02G494400	--	--	Cellular Component: integral component of membrane (GO:0016021);;	--	--	--	UPF0481 protein At3g47200-like [Aegilops tauschii subsp. tauschii]
TraesCS1A02G287200	--	--	--	--	--	--	hypothetical protein TRIUR3_13829 [Triticum urartu]
TraesCS2B02G525900	--	--	Molecular Function: ATP binding (GO:0005524);; Biological Process: phosphorylation (GO:0016310);; Molecular Function: inositol pentakisphosphate 2-kinase activity (GO:0035299);; Molecular Function: metal ion binding (GO:0046872);;	K10572|0|bdi:100821360|K10572 inositol-pentakisphosphate 2-kinase [EC:2.7.1.158] | (RefSeq) inositol-pentakisphosphate 2-kinase IPK1	Inositol phosphate metabolism (ko00562);; Phosphatidylinositol signaling system (ko04070)	Inositol-pentakisphosphate 2-kinase IPK1 OS=Oryza sativa subsp. japonica OX=39947 GN=IPK1 PE=2 SV=1	inositol-pentakisphosphate 2-kinase IPK1-like [Aegilops tauschii subsp. tauschii]
TraesCS1A02G035600	--	--	Molecular Function: kinase activity (GO:0016301);; Biological Process: phosphorylation (GO:0016310);;	--	--	Cysteine-rich repeat secretory protein 55 OS=Arabidopsis thaliana OX=3702 GN=CRRSP55 PE=2 SV=1	cysteine-rich repeat secretory protein 55-like [Aegilops tauschii subsp. tauschii]
TraesCS6A02G137400	--	--	--	--	--	--	uncharacterized protein LOC109757550 [Aegilops tauschii subsp. tauschii]
Triticum_aestivum_newGene_61393	[R]	General function prediction only	Cellular Component: mitochondrion (GO:0005739);;	--	--	Hsp70-Hsp90 organizing protein 1 OS=Glycine max OX=3847 GN=HOP1 PE=1 SV=2	Ankyrin-2 [Triticum urartu]
TraesCS1A02G263700	--	--	Molecular Function: DNA binding (GO:0003677);; Cellular Component: nucleus (GO:0005634);; Biological Process: regulation of transcription, DNA-templated (GO:0006355);;	--	--	NAC domain-containing protein 48 OS=Oryza sativa subsp. japonica OX=39947 GN=NAC048 PE=1 SV=1	NAC domain-containing protein 48-like [Aegilops tauschii subsp. tauschii]
Triticum_aestivum_newGene_24200	--	--	--	--	--	--	uncharacterized protein LOC109769195 [Aegilops tauschii subsp. tauschii]
TraesCS6A02G299200	[F]	Nucleotide transport and metabolism	Molecular Function: dihydroorotate dehydrogenase activity (GO:0004152);; Biological Process: 'de novo' pyrimidine nucleobase biosynthetic process (GO:0006207);; Biological Process: uracil catabolic process (GO:0006212);; Cellular Component: chloroplast stroma (GO:0009570);; Molecular Function: dihydropyrimidine dehydrogenase (NADP+) activity (GO:0017113);; Biological Process: oxidation-reduction …	K00207|0|bdi:100844077|K00207 dihydropyrimidine dehydrogenase (NADP+) [EC:1.3.1.2] | (RefSeq) dihydropyrimidine dehydrogenase (NADP(+)), chloroplastic	Pyrimidine metabolism (ko00240);; beta-Alanine metabolism (ko00410);; Pantothenate and CoA biosynthesis (ko00770)	Dihydropyrimidine dehydrogenase (NADP(+)), chloroplastic OS=Arabidopsis thaliana OX=3702 GN=PYD1 PE=1 SV=1	dihydropyrimidine dehydrogenase (NADP(+)), chloroplastic [Aegilops tauschii subsp. tauschii]
TraesCS1D02G122600	--	--	--	--	--	Protein ANTAGONIST OF LIKE HETEROCHROMATIN PROTEIN 1 OS=Arabidopsis thaliana OX=3702 GN=ALP1 PE=1 SV=1	protein ALP1-like [Aegilops tauschii subsp. tauschii]
TraesCS2D02G581700	[QV]	Secondary metabolites biosynthesis, transport and catabolism;; Defense mechanisms	Molecular Function: iron ion binding (GO:0005506);; Cellular Component: integral component of membrane (GO:0016021);; Molecular Function: oxidoreductase activity, acting on paired donors, with incorporation or reduction of molecular oxygen, NAD(P)H as one donor, and incorporation of one atom of oxygen (GO:0016709);; Molecular Function: heme binding (GO:0020037);; Biological Process: secondary met…	--	--	Flavonoid 3&apos;-monooxygenase OS=Arabidopsis thaliana OX=3702 GN=CYP75B1 PE=1 SV=1	flavonoid 3&apos;-monooxygenase-like isoform X2 [Aegilops tauschii subsp. tauschii]
TraesCS5B02G054600	--	--	Molecular Function: zinc ion binding (GO:0008270);; Cellular Component: integral component of membrane (GO:0016021);;	K10666|7.62782e-25|osa:4336483|K10666 E3 ubiquitin-protein ligase RNF5 [EC:2.3.2.27] | (RefSeq) E3 ubiquitin-protein ligase RMA1H1	Protein processing in endoplasmic reticulum (ko04141)	E3 ubiquitin-protein ligase RMA3 OS=Arabidopsis thaliana OX=3702 GN=RMA3 PE=1 SV=1	E3 ubiquitin-protein ligase RMA2-like [Aegilops tauschii subsp. tauschii]
TraesCS2B02G159700	--	--	--	K10523|0|bdi:100834579|K10523 speckle-type POZ protein | (RefSeq) BTB/POZ and MATH domain-containing protein 1-like	--	BTB/POZ and MATH domain-containing protein 1 OS=Arabidopsis thaliana OX=3702 GN=BPM1 PE=1 SV=1	BTB/POZ and MATH domain-containing protein 1-like [Aegilops tauschii subsp. tauschii]
TraesCS2B02G224300	[E]	Amino acid transport and metabolism	Cellular Component: cytoplasm (GO:0005737);; Biological Process: L-phenylalanine catabolic process (GO:0006559);; Biological Process: cinnamic acid biosynthetic process (GO:0009800);; Molecular Function: phenylalanine ammonia-lyase activity (GO:0045548);;	K10775|0|bdi:100845653|K10775 phenylalanine ammonia-lyase [EC:4.3.1.24] | (RefSeq) phenylalanine ammonia-lyase	Phenylalanine metabolism (ko00360);; Phenylpropanoid biosynthesis (ko00940)	Phenylalanine ammonia-lyase OS=Triticum aestivum OX=4565 GN=PAL PE=3 SV=1	phenylalanine ammonia-lyase-like [Aegilops tauschii subsp. tauschii]
Triticum_aestivum_newGene_73161	[T]	Signal transduction mechanisms	--	--	--	Protein ACCELERATED CELL DEATH 6 OS=Arabidopsis thaliana OX=3702 GN=ACD6 PE=1 SV=1	uncharacterized protein LOC109759726 isoform X2 [Aegilops tauschii subsp. tauschii]
TraesCS5D02G050200	--	--	Cellular Component: integral component of membrane (GO:0016021);;	--	--	Protein WIR1B OS=Triticum aestivum OX=4565 GN=WIR1B PE=4 SV=1	protein WIR1B [Aegilops tauschii subsp. tauschii]
TraesCS6A02G283700	--	--	Molecular Function: DNA binding (GO:0003677);; Molecular Function: aspartic-type endopeptidase activity (GO:0004190);; Biological Process: proteolysis (GO:0006508);; Cellular Component: integral component of membrane (GO:0016021);; Biological Process: protein catabolic process (GO:0030163);;	--	--	Aspartyl protease family protein At5g10770 OS=Arabidopsis thaliana OX=3702 GN=At5g10770 PE=2 SV=1	aspartyl protease family protein At5g10770-like isoform X1 [Aegilops tauschii subsp. tauschii]
TraesCS1D02G142100	--	--	Molecular Function: zinc ion binding (GO:0008270);; Cellular Component: integral component of membrane (GO:0016021);; Biological Process: regulation of stomatal opening (GO:1902456);;	K10144|7.10254e-162|bdi:100822563|K10144 RING finger and CHY zinc finger domain-containing protein 1 [EC:2.3.2.27] | (RefSeq) E3 ubiquitin-protein ligase MIEL1	Ubiquitin mediated proteolysis (ko04120)	E3 ubiquitin-protein ligase RZFP34 OS=Arabidopsis thaliana OX=3702 GN=RZPF34 PE=1 SV=1	E3 ubiquitin-protein ligase MIEL1-like [Aegilops tauschii subsp. tauschii]
TraesCS3D02G379400	[O]	Posttranslational modification, protein turnover, chaperones	Biological Process: protein folding (GO:0006457);; Molecular Function: unfolded protein binding (GO:0051082);;	K09519|0|bdi:100839987|K09519 DnaJ homolog subfamily B member 13 | (RefSeq) dnaJ protein homolog 1-like	--	DnaJ protein ERDJ3B OS=Oryza sativa subsp. japonica OX=39947 GN=ERDJ3B PE=1 SV=1	dnaJ protein homolog 1-like [Aegilops tauschii subsp. tauschii]
TraesCS5A02G315700	[R]	General function prediction only	Molecular Function: GTP binding (GO:0005525);; Cellular Component: endosome (GO:0005768);; Biological Process: small GTPase mediated signal transduction (GO:0007264);;	K07904|8.61586e-129|obr:102707803|K07904 Ras-related protein Rab-11A | (RefSeq) ras-related protein RABA3-like	Endocytosis (ko04144)	Ras-related protein RABA3 OS=Arabidopsis thaliana OX=3702 GN=RABA3 PE=2 SV=1	predicted protein [Hordeum vulgare subsp. vulgare]
TraesCS6B02G324600	--	--	Molecular Function: DNA binding (GO:0003677);;	K09422|7.17782e-100|bdi:100840827|K09422 myb proto-oncogene protein, plant | (RefSeq) protein ODORANT1	--	Transcription factor MYB20 OS=Arabidopsis thaliana OX=3702 GN=MYB20 PE=2 SV=1	protein ODORANT1-like [Aegilops tauschii subsp. tauschii]
Triticum_aestivum_newGene_8364	--	--	Cellular Component: mitochondrion (GO:0005739);; Cellular Component: chloroplast thylakoid membrane (GO:0009535);; Cellular Component: integral component of membrane (GO:0016021);;	--	--	--	predicted protein, partial [Hordeum vulgare subsp. vulgare]
Triticum_aestivum_newGene_24168	--	--	--	--	--	--	hypothetical protein TRIUR3_28985 [Triticum urartu]
TraesCS2D02G090800	[E]	Amino acid transport and metabolism	Molecular Function: serine-type carboxypeptidase activity (GO:0004185);; Cellular Component: membrane (GO:0016020);; Biological Process: proteolysis involved in cellular protein catabolic process (GO:0051603);;	K16297|8.63531e-169|bdi:100830060|K16297 serine carboxypeptidase-like clade II [EC:3.4.16.-] | (RefSeq) serine carboxypeptidase II-3	--	Serine carboxypeptidase II-3 OS=Hordeum vulgare OX=4513 GN=CXP;2-3 PE=2 SV=1	serine carboxypeptidase II-3-like [Aegilops tauschii subsp. tauschii]
TraesCS3A02G348500	[O]	Posttranslational modification, protein turnover, chaperones	Molecular Function: cysteine-type endopeptidase activity (GO:0004197);; Cellular Component: extracellular space (GO:0005615);; Cellular Component: lysosome (GO:0005764);; Cellular Component: integral component of membrane (GO:0016021);; Biological Process: proteolysis involved in cellular protein catabolic process (GO:0051603);;	K16292|0|sita:101769259|K16292 KDEL-tailed cysteine endopeptidase [EC:3.4.22.-] | (RefSeq) vignain-like	--	Thiol protease SEN102 OS=Hemerocallis sp. OX=29711 GN=SEN102 PE=2 SV=1	thiol protease SEN102-like [Aegilops tauschii subsp. tauschii]
TraesCS3D02G508100	--	--	Molecular Function: protein kinase activity (GO:0004672);; Molecular Function: ATP binding (GO:0005524);; Biological Process: protein phosphorylation (GO:0006468);; Cellular Component: intracellular membrane-bounded organelle (GO:0043231);;	--	--	--	uncharacterized protein LOC109768580 [Aegilops tauschii subsp. tauschii]
TraesCS4A02G046900	--	--	Molecular Function: protein binding (GO:0005515);; Cellular Component: nucleus (GO:0005634);;	K18811|3.66237e-109|bdi:100832008|K18811 cyclin D5, plant | (RefSeq) cyclin-D5-3	--	Cyclin-D5-3 OS=Oryza sativa subsp. japonica OX=39947 GN=CYCD5-3 PE=2 SV=1	cyclin-D5-3-like [Aegilops tauschii subsp. tauschii]
TraesCS2B02G475400	--	--	--	--	--	--	uncharacterized protein LOC109765778 [Aegilops tauschii subsp. tauschii]
TraesCS6D02G113500	--	--	Molecular Function: signal transducer activity (GO:0004871);; Biological Process: defense response (GO:0006952);; Cellular Component: plasmodesma (GO:0009506);; Cellular Component: integral component of membrane (GO:0016021);; Cellular Component: anchored component of plasma membrane (GO:0046658);;	--	--	--	uncharacterized protein LOC109734675 [Aegilops tauschii subsp. tauschii]
TraesCS6A02G150000	[I]	Lipid transport and metabolism	Molecular Function: iron ion binding (GO:0005506);; Biological Process: fatty acid biosynthetic process (GO:0006633);; Biological Process: wax biosynthetic process (GO:0010025);; Cellular Component: integral component of membrane (GO:0016021);; Molecular Function: oxidoreductase activity (GO:0016491);; Biological Process: alkane biosynthetic process (GO:0043447);; Biological Process: aldehyde bio…	--	--	Protein ECERIFERUM 3 OS=Arabidopsis thaliana OX=3702 GN=CER3 PE=1 SV=1	protein ECERIFERUM 3-like [Aegilops tauschii subsp. tauschii]
TraesCS2B02G198100	--	--	Molecular Function: nucleotide binding (GO:0000166);; Molecular Function: nucleic acid binding (GO:0003676);; Cellular Component: mitochondrion (GO:0005739);;	K13346|5.29196e-80|sita:101755488|K13346 peroxin-10 | (RefSeq) uncharacterized LOC101755488	Peroxisome (ko04146)	Stress-response A/B barrel domain-containing protein UP3 OS=Arabidopsis thaliana OX=3702 GN=UP3 PE=1 SV=1	stress-response A/B barrel domain-containing protein DABB1-like [Aegilops tauschii subsp. tauschii]
TraesCS2B02G379400	[K]	Transcription	Molecular Function: protein kinase activity (GO:0004672);; Molecular Function: ATP binding (GO:0005524);; Biological Process: protein phosphorylation (GO:0006468);; Cellular Component: integral component of membrane (GO:0016021);; Molecular Function: transferase activity, transferring hexosyl groups (GO:0016758);;	--	--	Probable leucine-rich repeat receptor-like protein kinase At5g63930 OS=Arabidopsis thaliana OX=3702 GN=At5g63930 PE=2 SV=1	probable leucine-rich repeat receptor-like protein kinase At5g63930 [Aegilops tauschii subsp. tauschii]
TraesCS2B02G058000	[QV]	Secondary metabolites biosynthesis, transport and catabolism;; Defense mechanisms	Molecular Function: iron ion binding (GO:0005506);; Cellular Component: integral component of membrane (GO:0016021);; Molecular Function: oxidoreductase activity, acting on paired donors, with incorporation or reduction of molecular oxygen, NAD(P)H as one donor, and incorporation of one atom of oxygen (GO:0016709);; Molecular Function: heme binding (GO:0020037);; Biological Process: secondary met…	--	--	3-hydroxyindolin-2-one monooxygenase OS=Zea mays OX=4577 GN=CYP71C1 PE=1 SV=1	indole-2-monooxygenase-like [Aegilops tauschii subsp. tauschii]
TraesCS6B02G082900	[T]	Signal transduction mechanisms	Molecular Function: nucleotide binding (GO:0000166);;	--	--	Putative receptor-like protein kinase At4g00960 OS=Arabidopsis thaliana OX=3702 GN=At4g00960 PE=3 SV=2	uncharacterized protein LOC109767595 [Aegilops tauschii subsp. tauschii]
TraesCS3A02G452600	[DPM]	Cell cycle control, cell division, chromosome partitioning;; Inorganic ion transport and metabolism;; Cell wall/membrane/envelope biogenesis	Molecular Function: copper ion binding (GO:0005507);; Molecular Function: oxidoreductase activity, oxidizing metal ions (GO:0016722);; Biological Process: lignin catabolic process (GO:0046274);; Cellular Component: apoplast (GO:0048046);; Molecular Function: hydroquinone:oxygen oxidoreductase activity (GO:0052716);; Biological Process: oxidation-reduction process (GO:0055114);;	K05909|0|bdi:100841979|K05909 laccase [EC:1.10.3.2] | (RefSeq) laccase-19-like	--	Laccase-19 OS=Oryza sativa subsp. japonica OX=39947 GN=LAC19 PE=2 SV=1	laccase-19 [Aegilops tauschii subsp. tauschii]
TraesCS2B02G603500	--	--	Molecular Function: aspartic-type endopeptidase activity (GO:0004190);; Cellular Component: cell wall (GO:0005618);; Biological Process: proteolysis (GO:0006508);; Biological Process: protein catabolic process (GO:0030163);;	--	--	Aspartic proteinase nepenthesin-1 OS=Nepenthes gracilis OX=150966 GN=nep1 PE=1 SV=1	probable aspartyl protease At4g16563 [Aegilops tauschii subsp. tauschii]
Triticum_aestivum_newGene_59393	--	--	--	--	--	--	predicted protein [Hordeum vulgare subsp. vulgare]
TraesCS2B02G414700	--	--	Cellular Component: plastid (GO:0009536);;	--	--	--	uncharacterized protein LOC109784429 [Aegilops tauschii subsp. tauschii]
Triticum_aestivum_newGene_6431	--	--	--	--	--	--	predicted protein, partial [Hordeum vulgare subsp. vulgare]
TraesCS5A02G269300	[I]	Lipid transport and metabolism	Molecular Function: hydroxymethylglutaryl-CoA reductase (NADPH) activity (GO:0004420);; Cellular Component: mitochondrion (GO:0005739);; Cellular Component: peroxisomal membrane (GO:0005778);; Cellular Component: endoplasmic reticulum membrane (GO:0005789);; Biological Process: isoprenoid biosynthetic process (GO:0008299);; Biological Process: coenzyme A metabolic process (GO:0015936);; Cellular …	K00021|0|bdi:100828238|K00021 hydroxymethylglutaryl-CoA reductase (NADPH) [EC:1.1.1.34] | (RefSeq) 3-hydroxy-3-methylglutaryl-coenzyme A reductase 3-like	Terpenoid backbone biosynthesis (ko00900)	3-hydroxy-3-methylglutaryl-coenzyme A reductase OS=Zea mays OX=4577 GN=HMGR PE=3 SV=1	3-hydroxy-3-methylglutaryl-coenzyme A reductase 3-like [Aegilops tauschii subsp. tauschii]
TraesCS2B02G213400	--	--	--	--	--	--	interferon-related developmental regulator 2-like [Aegilops tauschii subsp. tauschii]
TraesCS2B02G138200	--	--	Cellular Component: integral component of membrane (GO:0016021);;	--	--	--	hypothetical protein TRIUR3_29094 [Triticum urartu]
TraesCS5A02G311500	--	--	Molecular Function: DNA binding (GO:0003677);; Molecular Function: transcription factor activity, sequence-specific DNA binding (GO:0003700);; Cellular Component: nucleus (GO:0005634);; Biological Process: regulation of transcription, DNA-templated (GO:0006355);;	--	--	Dehydration-responsive element-binding protein 1H OS=Oryza sativa subsp. japonica OX=39947 GN=DREB1H PE=3 SV=1	AP2 domain CBF protein [Triticum aestivum]
TraesCS2B02G330300	--	--	--	--	--	--	uncharacterized protein LOC109733790 [Aegilops tauschii subsp. tauschii]
Triticum_aestivum_newGene_47318	[R]	General function prediction only	Molecular Function: protein kinase activity (GO:0004672);; Molecular Function: ATP binding (GO:0005524);; Biological Process: protein phosphorylation (GO:0006468);;	--	--	Coatomer subunit beta&apos;-1 OS=Oryza sativa subsp. japonica OX=39947 GN=Os06g0143900 PE=2 SV=1	Cysteine-rich receptor-like protein kinase 7 [Triticum urartu]
TraesCS1D02G335900	--	--	Molecular Function: magnesium ion transmembrane transporter activity (GO:0015095);; Biological Process: magnesium ion transport (GO:0015693);; Cellular Component: integral component of membrane (GO:0016021);; Biological Process: magnesium ion transmembrane transport (GO:1903830);;	--	--	Probable magnesium transporter NIPA5 OS=Arabidopsis thaliana OX=3702 GN=At4g09640 PE=2 SV=1	probable magnesium transporter NIPA6 isoform X2 [Aegilops tauschii subsp. tauschii]
Triticum_aestivum_newGene_72352	[FE]	Nucleotide transport and metabolism;; Amino acid transport and metabolism	Biological Process: spliceosomal tri-snRNP complex assembly (GO:0000244);; Molecular Function: second spliceosomal transesterification activity (GO:0000386);; Cellular Component: U5 snRNP (GO:0005682);; Molecular Function: U6 snRNA binding (GO:0017070);; Molecular Function: U1 snRNA binding (GO:0030619);; Molecular Function: U2 snRNA binding (GO:0030620);; Molecular Function: U5 snRNA binding (GO…	K12856|1.60319e-91|vcn:VOLCADRAFT_107338|K12856 pre-mRNA-processing factor 8 | (RefSeq) hypothetical protein	Spliceosome (ko03040)	Pre-mRNA-processing-splicing factor 8A OS=Arabidopsis thaliana OX=3702 GN=PRP8A PE=1 SV=1	hypothetical protein VOLCADRAFT_107338 [Volvox carteri f. nagariensis]
Triticum_aestivum_newGene_92431	--	--	Molecular Function: DNA binding (GO:0003677);; Molecular Function: ADP binding (GO:0043531);;	--	--	--	Auxilin-related protein 2 [Triticum urartu]
TraesCS1B02G019800	[C]	Energy production and conversion	Molecular Function: NADPH dehydrogenase activity (GO:0003959);; Cellular Component: intracellular (GO:0005622);; Biological Process: defense response (GO:0006952);; Biological Process: jasmonic acid biosynthetic process (GO:0009695);; Molecular Function: FMN binding (GO:0010181);; Molecular Function: 12-oxophytodienoate reductase activity (GO:0016629);; Biological Process: oxylipin biosynthetic p…	K05894|0|bdi:100826659|K05894 12-oxophytodienoic acid reductase [EC:1.3.1.42] | (RefSeq) putative 12-oxophytodienoate reductase 4	alpha-Linolenic acid metabolism (ko00592)	Putative 12-oxophytodienoate reductase 5 OS=Oryza sativa subsp. japonica OX=39947 GN=OPR5 PE=2 SV=1	12-oxophytodienoate reductase 1-like [Aegilops tauschii subsp. tauschii]
TraesCS7A02G423600	[MDT]	Cell wall/membrane/envelope biogenesis;; Cell cycle control, cell division, chromosome partitioning;; Signal transduction mechanisms	Molecular Function: ATP binding (GO:0005524);; Biological Process: cell division (GO:0051301);;	--	--	AAA-ATPase At3g28580 OS=Arabidopsis thaliana OX=3702 GN=At3g28580 PE=2 SV=1	AAA-ATPase At3g50940-like [Aegilops tauschii subsp. tauschii]
TraesCS2B02G199500	--	--	Molecular Function: chromatin binding (GO:0003682);;	--	--	--	uncharacterized protein LOC109786142 [Aegilops tauschii subsp. tauschii]
TraesCS5B02G431600	--	--	Molecular Function: hydrolase activity, hydrolyzing O-glycosyl compounds (GO:0004553);; Biological Process: carbohydrate metabolic process (GO:0005975);; Cellular Component: integral component of membrane (GO:0016021);; Molecular Function: polysaccharide binding (GO:0030247);; Cellular Component: anchored component of plasma membrane (GO:0046658);;	--	--	Glucan endo-1,3-beta-glucosidase 8 OS=Arabidopsis thaliana OX=3702 GN=At1g64760 PE=1 SV=2	glucan endo-1,3-beta-glucosidase 8-like [Aegilops tauschii subsp. tauschii]
Triticum_aestivum_newGene_74651	--	--	--	K14498|7.06053e-07|bdi:100839347|K14498 serine/threonine-protein kinase SRK2 [EC:2.7.11.1] | (RefSeq) SAPK9; serine/threonine-protein kinase SAPK9	Plant hormone signal transduction (ko04075)	Serine/threonine-protein kinase SAPK9 OS=Oryza sativa subsp. japonica OX=39947 GN=SAPK9 PE=1 SV=1	stress activated protein kinase 9 [Brachypodium sp. AD-2016]
Triticum_aestivum_newGene_29707	--	--	Biological Process: cellular process (GO:0009987);; Biological Process: response to stimulus (GO:0050896);;	K07199|6.78935e-72|osa:4339173|K07199 5'-AMP-activated protein kinase, regulatory beta subunit | (RefSeq) OSKbeta2; SNF1-related protein kinase regulatory subunit beta-1	--	SNF1-related protein kinase regulatory subunit beta-1 OS=Arabidopsis thaliana OX=3702 GN=KINB1 PE=1 SV=1	SNF1-related protein kinase regulatory subunit beta-1-like [Aegilops tauschii subsp. tauschii]
TraesCS5D02G549400	--	--	Molecular Function: ADP binding (GO:0043531);;	--	--	Putative disease resistance protein RGA3 OS=Solanum bulbocastanum OX=147425 GN=RGA3 PE=2 SV=2	putative disease resistance protein RGA3 [Aegilops tauschii subsp. tauschii]
TraesCS3B02G096600	[T]	Signal transduction mechanisms	Molecular Function: protein serine/threonine phosphatase activity (GO:0004722);; Cellular Component: cytoplasm (GO:0005737);; Biological Process: protein dephosphorylation (GO:0006470);; Cellular Component: protein serine/threonine phosphatase complex (GO:0008287);; Molecular Function: metal ion binding (GO:0046872);;	K06269|4.82443e-116|bdi:100827362|K06269 serine/threonine-protein phosphatase PP1 catalytic subunit [EC:3.1.3.16] | (RefSeq) serine/threonine-protein phosphatase alpha-3 isoform-like	mRNA surveillance pathway (ko03015)	Serine/threonine-protein phosphatase PP1 isozyme 1 OS=Arabidopsis thaliana OX=3702 GN=TOPP1 PE=1 SV=1	unnamed protein product [Triticum aestivum]
TraesCS3D02G416000	--	--	--	--	--	--	uncharacterized protein LOC109737351 [Aegilops tauschii subsp. tauschii]
TraesCS5B02G491300	--	--	Molecular Function: metal ion binding (GO:0046872);;	--	--	Zinc finger protein ZAT8 OS=Arabidopsis thaliana OX=3702 GN=ZAT8 PE=2 SV=1	zinc finger protein ZAT8-like [Aegilops tauschii subsp. tauschii]
TraesCS5B02G426300	[O]	Posttranslational modification, protein turnover, chaperones	Molecular Function: glutathione transferase activity (GO:0004364);; Cellular Component: cytoplasm (GO:0005737);; Biological Process: glutathione metabolic process (GO:0006749);; Biological Process: toxin catabolic process (GO:0009407);;	K00799|1.52938e-111|bdi:100846750|K00799 glutathione S-transferase [EC:2.5.1.18] | (RefSeq) probable glutathione S-transferase GSTU1	Glutathione metabolism (ko00480)	Probable glutathione S-transferase GSTU1 OS=Oryza sativa subsp. japonica OX=39947 GN=GSTU1 PE=1 SV=1	probable glutathione S-transferase GSTU1 [Aegilops tauschii subsp. tauschii]
TraesCS2B02G393400	[O]	Posttranslational modification, protein turnover, chaperones	Molecular Function: serine-type endopeptidase activity (GO:0004252);; Cellular Component: mitochondrion (GO:0005739);; Biological Process: proteolysis (GO:0006508);;	K01358|1.47058e-140|zma:100280963|K01358 ATP-dependent Clp protease, protease subunit [EC:3.4.21.92] | (RefSeq) GRMZM2G320135; ATP-dependent Clp protease proteolytic subunit	--	ATP-dependent Clp protease proteolytic subunit 2, mitochondrial OS=Arabidopsis thaliana OX=3702 GN=CLPP2 PE=1 SV=1	uncharacterized protein LOC109764342 [Aegilops tauschii subsp. tauschii]
TraesCS6B02G462100	--	--	Biological Process: regulation of leaf development (GO:2000024);;	--	--	Transcription factor TCP7 OS=Arabidopsis thaliana OX=3702 GN=TCP7 PE=1 SV=1	transcription factor TCP21-like [Aegilops tauschii subsp. tauschii]
TraesCS6B02G068300	[G]	Carbohydrate transport and metabolism	Cellular Component: mitochondrion (GO:0005739);; Biological Process: flavonoid biosynthetic process (GO:0009813);; Cellular Component: membrane (GO:0016020);; Biological Process: flavonoid glucuronidation (GO:0052696);; Molecular Function: quercetin 3-O-glucosyltransferase activity (GO:0080043);; Molecular Function: quercetin 7-O-glucosyltransferase activity (GO:0080044);;	K08237|0|bdi:104581253|K08237 hydroquinone glucosyltransferase [EC:2.4.1.218] | (RefSeq) hydroquinone glucosyltransferase	--	Hydroquinone glucosyltransferase OS=Rauvolfia serpentina OX=4060 GN=AS PE=1 SV=1	predicted protein [Hordeum vulgare subsp. vulgare]
TraesCS6D02G349800	--	--	--	--	--	--	uncharacterized protein LOC109755526 [Aegilops tauschii subsp. tauschii]
TraesCS4A02G070700	--	--	--	--	--	Thaumatin-like protein 1 OS=Arabidopsis thaliana OX=3702 GN=TLP1 PE=2 SV=1	thaumatin-like protein 1b [Aegilops tauschii subsp. tauschii]
Triticum_aestivum_newGene_69463	--	--	Molecular Function: tRNA-intron endonuclease activity (GO:0000213);; Molecular Function: nucleic acid binding (GO:0003676);; Molecular Function: threonine-tRNA ligase activity (GO:0004829);; Molecular Function: ATP binding (GO:0005524);; Cellular Component: mitochondrion (GO:0005739);; Biological Process: tRNA splicing, via endonucleolytic cleavage and ligation (GO:0006388);; Biological Process: …	--	--	--	Threonyl-tRNA synthetase, mitochondrial [Triticum urartu]
TraesCS6A02G417900	[T]	Signal transduction mechanisms	Molecular Function: protein serine/threonine kinase activity (GO:0004674);; Molecular Function: ATP binding (GO:0005524);; Biological Process: protein phosphorylation (GO:0006468);; Biological Process: signal transduction (GO:0007165);; Biological Process: detection of chemical stimulus (GO:0009593);; Biological Process: response to bacterium (GO:0009617);; Biological Process: response to fungus …	K13429|0|bdi:100825025|K13429 chitin elicitor receptor kinase 1 | (RefSeq) chitin elicitor receptor kinase 1	Plant-pathogen interaction (ko04626)	Chitin elicitor receptor kinase 1 OS=Oryza sativa subsp. japonica OX=39947 GN=CERK1 PE=1 SV=1	Proline-rich receptor-like protein kinase PERK1 [Triticum urartu]
TraesCS6D02G388000	[T]	Signal transduction mechanisms	Molecular Function: phosphoprotein phosphatase activity (GO:0004721);; Biological Process: protein dephosphorylation (GO:0006470);; Molecular Function: metal ion binding (GO:0046872);;	K06269|0|obr:102703235|K06269 serine/threonine-protein phosphatase PP1 catalytic subunit [EC:3.1.3.16] | (RefSeq) serine/threonine-protein phosphatase PP1 isozyme 3-like	mRNA surveillance pathway (ko03015)	Serine/threonine-protein phosphatase PP1 OS=Oryza sativa subsp. japonica OX=39947 GN=Os03g0268000 PE=2 SV=2	serine/threonine-protein phosphatase PP1-like [Aegilops tauschii subsp. tauschii]
TraesCS2B02G447600	--	--	--	--	--	--	cold-responsive protein WCOR15-2B, partial [Aegilops speltoides]
TraesCS2B02G326500	--	--	--	--	--	--	PREDICTED: uncharacterized protein LOC100824156 [Brachypodium distachyon]
TraesCS2B02G520600	[DZ]	Cell cycle control, cell division, chromosome partitioning;; Cytoskeleton	Molecular Function: DNA binding (GO:0003677);;	--	--	Ultraviolet-B receptor UVR8 OS=Arabidopsis thaliana OX=3702 GN=UVR8 PE=1 SV=1	protein RCC2 [Aegilops tauschii subsp. tauschii]
TraesCS3D02G306600	--	--	Biological Process: defense response (GO:0006952);;	--	--	Protein LURP-one-related 12 OS=Arabidopsis thaliana OX=3702 GN=At3g15810 PE=2 SV=1	protein LURP-one-related 5-like [Aegilops tauschii subsp. tauschii]
TraesCS6D02G301000	--	--	--	--	--	--	uncharacterized protein LOC109751063 [Aegilops tauschii subsp. tauschii]
Triticum_aestivum_newGene_71263	[G]	Carbohydrate transport and metabolism	Molecular Function: 6-phosphofructokinase activity (GO:0003872);; Molecular Function: ATP binding (GO:0005524);; Biological Process: fructose 6-phosphate metabolic process (GO:0006002);; Cellular Component: plastid (GO:0009536);; Molecular Function: metal ion binding (GO:0046872);; Biological Process: glycolytic process through fructose-6-phosphate (GO:0061615);;	K00850|3.3136e-55|bdi:100833338|K00850 6-phosphofructokinase 1 [EC:2.7.1.11] | (RefSeq) ATP-dependent 6-phosphofructokinase 2	Glycolysis / Gluconeogenesis (ko00010);; Pentose phosphate pathway (ko00030);; Fructose and mannose metabolism (ko00051);; Galactose metabolism (ko00052);; Carbon metabolism (ko01200);; Biosynthesis of amino acids (ko01230);; RNA degradation (ko03018)	ATP-dependent 6-phosphofructokinase 2 OS=Arabidopsis thaliana OX=3702 GN=PFK2 PE=1 SV=1	6-phosphofructokinase 2 [Triticum urartu]
TraesCS5D02G321800	[R]	General function prediction only	Molecular Function: GTP binding (GO:0005525);; Cellular Component: endosome (GO:0005768);; Biological Process: small GTPase mediated signal transduction (GO:0007264);;	K07904|1.23626e-126|obr:102707803|K07904 Ras-related protein Rab-11A | (RefSeq) ras-related protein RABA3-like	Endocytosis (ko04144)	Ras-related protein RABA3 OS=Arabidopsis thaliana OX=3702 GN=RABA3 PE=2 SV=1	ras-related protein RABA3-like [Aegilops tauschii subsp. tauschii]
Triticum_aestivum_newGene_24950	--	--	--	--	--	--	uncharacterized protein LOC109762332 [Aegilops tauschii subsp. tauschii]
Triticum_aestivum_newGene_69181	--	--	--	--	--	Uncharacterized aarF domain-containing protein kinase At5g05200, chloroplastic OS=Arabidopsis thaliana OX=3702 GN=At5g05200 PE=1 SV=1	--
Triticum_aestivum_newGene_54797	--	--	Molecular Function: nucleic acid binding (GO:0003676);; Molecular Function: purine ribonucleoside binding (GO:0032550);; Molecular Function: adenyl ribonucleotide binding (GO:0032559);; Molecular Function: anion binding (GO:0043168);;	--	--	--	uncharacterized protein LOC109760142 [Aegilops tauschii subsp. tauschii]
TraesCS2A02G397900	[EM]	Amino acid transport and metabolism;; Cell wall/membrane/envelope biogenesis	Molecular Function: 4-hydroxy-tetrahydrodipicolinate synthase (GO:0008840);; Biological Process: lysine biosynthetic process via diaminopimelate (GO:0009089);; Cellular Component: chloroplast (GO:0009507);; Biological Process: diaminopimelate biosynthetic process (GO:0019877);;	K01714|0|bdi:100834273|K01714 4-hydroxy-tetrahydrodipicolinate synthase [EC:4.3.3.7] | (RefSeq) 4-hydroxy-tetrahydrodipicolinate synthase 2, chloroplastic	Monobactam biosynthesis (ko00261);; Lysine biosynthesis (ko00300);; Biosynthesis of amino acids (ko01230)	4-hydroxy-tetrahydrodipicolinate synthase 2, chloroplastic OS=Triticum aestivum OX=4565 PE=1 SV=1	4-hydroxy-tetrahydrodipicolinate synthase 2, chloroplastic [Aegilops tauschii subsp. tauschii]
TraesCS6D02G397600	--	--	--	--	--	F-box/kelch-repeat protein At5g15710 OS=Arabidopsis thaliana OX=3702 GN=At5g15710 PE=2 SV=1	uncharacterized protein LOC109771359 isoform X1 [Aegilops tauschii subsp. tauschii]
Triticum_aestivum_newGene_67059	[K]	Transcription	Molecular Function: protein kinase activity (GO:0004672);; Molecular Function: ATP binding (GO:0005524);; Biological Process: protein phosphorylation (GO:0006468);; Cellular Component: integral component of membrane (GO:0016021);;	--	--	LRR receptor-like serine/threonine-protein kinase EFR OS=Arabidopsis thaliana OX=3702 GN=EFR PE=1 SV=1	probable LRR receptor-like serine/threonine-protein kinase At3g47570 [Aegilops tauschii subsp. tauschii]
TraesCS4B02G339300	--	--	Cellular Component: mitochondrion (GO:0005739);; Molecular Function: hydrolase activity, acting on ester bonds (GO:0016788);;	--	--	GDSL esterase/lipase At5g37690 OS=Arabidopsis thaliana OX=3702 GN=At5g37690 PE=2 SV=1	GDSL esterase/lipase At5g55050-like [Aegilops tauschii subsp. tauschii]
TraesCS6D02G384300	[V]	Defense mechanisms	Molecular Function: DNA binding (GO:0003677);; Molecular Function: transcription factor activity, sequence-specific DNA binding (GO:0003700);; Cellular Component: nucleus (GO:0005634);; Cellular Component: mitochondrion (GO:0005739);; Biological Process: regulation of transcription, DNA-templated (GO:0006355);; Biological Process: drug transmembrane transport (GO:0006855);; Molecular Function: dr…	K03327|0|sita:101761532|K03327 multidrug resistance protein, MATE family | (RefSeq) protein DETOXIFICATION 35-like	--	Protein DETOXIFICATION 34 OS=Arabidopsis thaliana OX=3702 GN=DTX34 PE=2 SV=1	protein DETOXIFICATION 35-like [Aegilops tauschii subsp. tauschii]
TraesCS5D02G388200	--	--	Cellular Component: nucleus (GO:0005634);; Biological Process: regulation of transcription, DNA-templated (GO:0006355);; Biological Process: regulation of translation (GO:0006417);; Biological Process: auxin-activated signaling pathway (GO:0009734);; Molecular Function: protein dimerization activity (GO:0046983);;	K14484|2.11652e-85|bdi:100831313|K14484 auxin-responsive protein IAA | (RefSeq) auxin-responsive protein IAA12	Plant hormone signal transduction (ko04075)	Auxin-responsive protein IAA12 OS=Oryza sativa subsp. japonica OX=39947 GN=IAA12 PE=2 SV=1	auxin-responsive protein IAA12-like [Aegilops tauschii subsp. tauschii]
TraesCS2B02G615800	--	--	Molecular Function: peroxidase activity (GO:0004601);; Cellular Component: extracellular region (GO:0005576);; Biological Process: response to oxidative stress (GO:0006979);; Cellular Component: plant-type cell wall (GO:0009505);; Biological Process: plant-type cell wall organization (GO:0009664);; Molecular Function: heme binding (GO:0020037);; Biological Process: hydrogen peroxide catabolic pro…	K00430|2.13667e-154|bdi:100840693|K00430 peroxidase [EC:1.11.1.7] | (RefSeq) cationic peroxidase SPC4-like	Phenylpropanoid biosynthesis (ko00940)	Cationic peroxidase SPC4 OS=Sorghum bicolor OX=4558 GN=Sb03g046810 PE=1 SV=2	cationic peroxidase SPC4-like [Aegilops tauschii subsp. tauschii]
TraesCS7D02G419300	[G]	Carbohydrate transport and metabolism	Molecular Function: hydrolase activity, hydrolyzing O-glycosyl compounds (GO:0004553);; Cellular Component: cell wall (GO:0005618);; Biological Process: xyloglucan metabolic process (GO:0010411);; Molecular Function: xyloglucan:xyloglucosyl transferase activity (GO:0016762);; Biological Process: cell wall biogenesis (GO:0042546);; Cellular Component: apoplast (GO:0048046);; Biological Process: ce…	K08235|1.83717e-176|sita:101771748|K08235 xyloglucan:xyloglucosyl transferase [EC:2.4.1.207] | (RefSeq) probable xyloglucan endotransglucosylase/hydrolase protein 25	--	Probable xyloglucan endotransglucosylase/hydrolase protein 25 OS=Arabidopsis thaliana OX=3702 GN=XTH25 PE=2 SV=2	probable xyloglucan endotransglucosylase/hydrolase protein 23 [Aegilops tauschii subsp. tauschii]
TraesCS2D02G004200	--	--	Cellular Component: plastid (GO:0009536);;	--	--	--	uncharacterized protein LOC109751701 [Aegilops tauschii subsp. tauschii]
TraesCS3D02G378300	--	--	Biological Process: transport (GO:0006810);; Cellular Component: integral component of membrane (GO:0016021);;	--	--	Patellin-3 OS=Arabidopsis thaliana OX=3702 GN=PATL3 PE=1 SV=2	patellin-3-like [Aegilops tauschii subsp. tauschii]
TraesCS2B02G133500	--	--	Molecular Function: RNA binding (GO:0003723);; Cellular Component: photosystem I (GO:0009522);; Cellular Component: chloroplast thylakoid membrane (GO:0009535);; Biological Process: photosynthesis (GO:0015979);;	K02701|2.72166e-59|zma:542605|K02701 photosystem I subunit PsaN | (RefSeq) psaN, psan1; photosystem I N subunit 1	Photosynthesis (ko00195)	Photosystem I reaction center subunit N, chloroplastic OS=Hordeum vulgare OX=4513 GN=PSAN PE=2 SV=1	photosystem I reaction center subunit N, chloroplastic [Aegilops tauschii subsp. tauschii]
TraesCS6D02G277500	--	--	Molecular Function: electron carrier activity (GO:0009055);; Cellular Component: anchored component of plasma membrane (GO:0046658);;	--	--	Blue copper protein OS=Pisum sativum OX=3888 PE=2 SV=1	blue copper protein-like [Aegilops tauschii subsp. tauschii]
TraesCS2A02G218700	[O]	Posttranslational modification, protein turnover, chaperones	Molecular Function: glutathione transferase activity (GO:0004364);; Cellular Component: cytoplasm (GO:0005737);; Biological Process: glutathione metabolic process (GO:0006749);; Biological Process: toxin catabolic process (GO:0009407);;	--	--	Probable glutathione S-transferase GSTU6 OS=Oryza sativa subsp. japonica OX=39947 GN=GSTU6 PE=2 SV=2	probable glutathione S-transferase GSTU6 [Aegilops tauschii subsp. tauschii]
TraesCS4B02G339400	[IR]	Lipid transport and metabolism;; General function prediction only	Molecular Function: hydrolase activity, acting on ester bonds (GO:0016788);;	--	--	GDSL esterase/lipase At5g55050 OS=Arabidopsis thaliana OX=3702 GN=At5g55050 PE=2 SV=1	GDSL esterase/lipase At5g55050-like [Aegilops tauschii subsp. tauschii]
TraesCS2B02G391900	--	--	--	--	--	--	hypothetical protein TRIUR3_11623 [Triticum urartu]
Triticum_aestivum_newGene_43979	--	--	--	--	--	--	BAG family molecular chaperone regulator 7 [Aegilops tauschii subsp. tauschii]
TraesCS5D02G251800	[G]	Carbohydrate transport and metabolism	--	--	--	--	uncharacterized protein LOC109747483 isoform X2 [Aegilops tauschii subsp. tauschii]
TraesCS2B02G475700	--	--	--	--	--	--	uncharacterized protein LOC109765778 [Aegilops tauschii subsp. tauschii]
TraesCS3A02G010000	--	--	--	--	--	Protein WVD2-like 3 OS=Arabidopsis thaliana OX=3702 GN=WDL3 PE=1 SV=1	hypothetical protein TRIUR3_05320 [Triticum urartu]
TraesCS3B02G317300	[O]	Posttranslational modification, protein turnover, chaperones	Molecular Function: serine-type endopeptidase activity (GO:0004252);; Cellular Component: cell wall (GO:0005618);; Biological Process: proteolysis (GO:0006508);;	--	--	Subtilisin-like protease SBT5.6 OS=Arabidopsis thaliana OX=3702 GN=SBT5.6 PE=2 SV=1	unnamed protein product [Triticum aestivum]
TraesCS2A02G460800	--	--	--	--	--	Cold-regulated protein BLT14 OS=Hordeum vulgare OX=4513 GN=BLT14 PE=2 SV=1	predicted protein, partial [Hordeum vulgare subsp. vulgare]
TraesCS6B02G251200	[K]	Transcription	--	--	--	--	F-box/LRR-repeat protein 14-like isoform X1 [Aegilops tauschii subsp. tauschii]
TraesCS4B02G101700	--	--	Cellular Component: mitochondrion (GO:0005739);;	--	--	--	protein BPS1, chloroplastic-like [Aegilops tauschii subsp. tauschii]
TraesCS1A02G141900	--	--	Cellular Component: mitochondrion (GO:0005739);; Molecular Function: zinc ion binding (GO:0008270);; Molecular Function: ligase activity (GO:0016874);;	--	--	E3 ubiquitin-protein ligase AIRP2 OS=Arabidopsis thaliana OX=3702 GN=AIRP2 PE=1 SV=1	uncharacterized protein LOC109763373 [Aegilops tauschii subsp. tauschii]
Triticum_aestivum_newGene_85657	--	--	Cellular Component: plastid (GO:0009536);; Biological Process: cellular metabolic process (GO:0044237);; Molecular Function: metal ion binding (GO:0046872);;	--	--	--	hypothetical protein TRIUR3_11313 [Triticum urartu]
TraesCSU02G002200	--	--	Cellular Component: integral component of membrane (GO:0016021);;	--	--	--	hypothetical protein TRIUR3_03960 [Triticum urartu]
TraesCS5A02G271100	[G]	Carbohydrate transport and metabolism	--	--	--	--	uncharacterized protein LOC109778576 isoform X1 [Aegilops tauschii subsp. tauschii]
Triticum_aestivum_newGene_59110	--	--	--	--	--	--	uncharacterized protein LOC109770927 [Aegilops tauschii subsp. tauschii]
TraesCS1D02G053300	--	--	Cellular Component: plastid (GO:0009536);;	--	--	Putative WEB family protein At1g65010, chloroplastic OS=Arabidopsis thaliana OX=3702 GN=At1g65010 PE=1 SV=1	WEB family protein At5g16730, chloroplastic-like [Aegilops tauschii subsp. tauschii]
TraesCS7D02G284100	[V]	Defense mechanisms	Molecular Function: ATP binding (GO:0005524);; Cellular Component: plasma membrane (GO:0005886);; Biological Process: regulation of cell size (GO:0008361);; Cellular Component: plasmodesma (GO:0009506);; Biological Process: response to blue light (GO:0009637);; Biological Process: photomorphogenesis (GO:0009640);; Biological Process: auxin polar transport (GO:0009926);; Biological Process: positi…	K05658|0|bdi:100831251|K05658 ATP-binding cassette, subfamily B (MDR/TAP), member 1 [EC:3.6.3.44] | (RefSeq) ABC transporter B family member 1	ABC transporters (ko02010)	ABC transporter B family member 1 OS=Arabidopsis thaliana OX=3702 GN=ABCB1 PE=1 SV=1	ABC transporter B family member 1 [Aegilops tauschii subsp. tauschii]
TraesCS2B02G623700	--		Molecular Function: protein kinase activity (GO:0004672);; Molecular Function: ATP binding (GO:0005524);; Biological Process: protein phosphorylation (GO:0006468);; Cellular Component: integral component of membrane (GO:0016021);;	--	--	Putative cysteine-rich receptor-like protein kinase 20 OS=Arabidopsis thaliana OX=3702 GN=CRK20 PE=2 SV=2	putative cysteine-rich receptor-like protein kinase 20 [Aegilops tauschii subsp. tauschii]
TraesCS2B02G258000	--	--	--	--	--	--	hypothetical protein TRIUR3_34374 [Triticum urartu]
TraesCS6B02G276300	[G]	Carbohydrate transport and metabolism	Molecular Function: trehalose-phosphatase activity (GO:0004805);; Biological Process: trehalose biosynthetic process (GO:0005992);; Biological Process: response to cold (GO:0009409);; Biological Process: response to salt stress (GO:0009651);; Biological Process: dephosphorylation (GO:0016311);;	K01087|0|bdi:100826238|K01087 trehalose 6-phosphate phosphatase [EC:3.1.3.12] | (RefSeq) probable trehalose-phosphate phosphatase 1	Starch and sucrose metabolism (ko00500)	Probable trehalose-phosphate phosphatase 1 OS=Oryza sativa subsp. japonica OX=39947 GN=TPP1 PE=1 SV=1	probable trehalose-phosphate phosphatase 1 [Aegilops tauschii subsp. tauschii]
TraesCS5A02G321100	[T]	Signal transduction mechanisms	Cellular Component: integral component of membrane (GO:0016021);; Molecular Function: hydrolase activity (GO:0016787);;	--	--	Probable inactive purple acid phosphatase 29 OS=Arabidopsis thaliana OX=3702 GN=PAP29 PE=2 SV=1	putative inactive purple acid phosphatase 29 [Triticum urartu]
Triticum_aestivum_newGene_45407	--	--	--	--	--	Putative ribonuclease H protein At1g65750 OS=Arabidopsis thaliana OX=3702 GN=At1g65750 PE=3 SV=1	uncharacterized protein LOC109766200 [Aegilops tauschii subsp. tauschii]
TraesCS2B02G477800	--	--	Cellular Component: chloroplast inner membrane (GO:0009706);; Biological Process: chloroplast fission (GO:0010020);; Cellular Component: integral component of membrane (GO:0016021);;	--	--	Protein MULTIPLE CHLOROPLAST DIVISION SITE 1 OS=Arabidopsis thaliana OX=3702 GN=MCD1 PE=1 SV=1	protein MULTIPLE CHLOROPLAST DIVISION SITE 1 [Aegilops tauschii subsp. tauschii]
TraesCS7A02G188100	--	--	Biological Process: amino acid transmembrane transport (GO:0003333);; Molecular Function: amino acid transmembrane transporter activity (GO:0015171);; Cellular Component: integral component of membrane (GO:0016021);;	K15015|0|bdi:100834390|K15015 solute carrier family 32 (vesicular inhibitory amino acid transporter) | (RefSeq) vacuolar amino acid transporter 1-like	--	Amino acid transporter AVT1I OS=Arabidopsis thaliana OX=3702 GN=AVT1I PE=3 SV=1	vacuolar amino acid transporter 1-like [Aegilops tauschii subsp. tauschii]
TraesCS2A02G501900	[H]	Coenzyme transport and metabolism	Molecular Function: dimethylallyltranstransferase activity (GO:0004161);; Molecular Function: geranyltranstransferase activity (GO:0004337);; Cellular Component: cytoplasm (GO:0005737);; Biological Process: farnesyl diphosphate biosynthetic process (GO:0045337);;	K00787|0|bdi:100844842|K00787 farnesyl diphosphate synthase [EC:2.5.1.1 2.5.1.10] | (RefSeq) farnesyl pyrophosphate synthase 1-like	Terpenoid backbone biosynthesis (ko00900)	Farnesyl pyrophosphate synthase OS=Zea mays OX=4577 GN=FPS PE=2 SV=1	farnesyl pyrophosphate synthase-like [Aegilops tauschii subsp. tauschii]
TraesCS1A02G326000	--	--	Cellular Component: mitochondrion (GO:0005739);; Cellular Component: integral component of membrane (GO:0016021);;	--	--	--	uncharacterized protein LOC109741876 [Aegilops tauschii subsp. tauschii]
Triticum_aestivum_newGene_42210	--	--	Cellular Component: Golgi apparatus (GO:0005794);; Biological Process: protein glycosylation (GO:0006486);; Molecular Function: galactosyltransferase activity (GO:0008378);; Cellular Component: integral component of membrane (GO:0016021);; Molecular Function: carbohydrate binding (GO:0030246);;	--	--	--	uncharacterized protein LOC109744085 isoform X1 [Aegilops tauschii subsp. tauschii]
Triticum_aestivum_newGene_10293	--	--	--	--	--	--	uncharacterized protein LOC109781667 [Aegilops tauschii subsp. tauschii]
TraesCS3B02G022000	[M]	Cell wall/membrane/envelope biogenesis	Cellular Component: integral component of membrane (GO:0016021);; Molecular Function: transferase activity, transferring glycosyl groups (GO:0016757);;	--	--	--	glycosyltransferase, HGA-like, putative,expressed [Triticum aestivum]
TraesCS5B02G483900	--	--	Biological Process: defense response (GO:0006952);;	--	--	Protein LURP-one-related 10 OS=Arabidopsis thaliana OX=3702 GN=At3g11740 PE=2 SV=2	protein LURP-one-related 15-like [Aegilops tauschii subsp. tauschii]
TraesCS2B02G259500	--	--	Biological Process: protein targeting to Golgi (GO:0000042);; Cellular Component: synaptonemal complex (GO:0000795);; Biological Process: reciprocal meiotic recombination (GO:0007131);;	--	--	Protein GRIP OS=Arabidopsis thaliana OX=3702 GN=GRIP PE=1 SV=2	protein GRIP [Aegilops tauschii subsp. tauschii]
TraesCS5B02G390900	--	--	Biological Process: phenylpropanoid biosynthetic process (GO:0009699);; Molecular Function: guiding stereospecific synthesis activity (GO:0042349);; Biological Process: regulation of catalytic activity (GO:0050790);;	--	--	Dirigent protein 19 OS=Arabidopsis thaliana OX=3702 GN=DIR19 PE=2 SV=1	dirigent protein 22-like [Aegilops tauschii subsp. tauschii]
TraesCS5A02G259700	--	--	--	--	--	--	uncharacterized protein LOC109786075 [Aegilops tauschii subsp. tauschii]
TraesCS7D02G071200	[G]	Carbohydrate transport and metabolism	Cellular Component: phosphopyruvate hydratase complex (GO:0000015);; Molecular Function: magnesium ion binding (GO:0000287);; Molecular Function: phosphopyruvate hydratase activity (GO:0004634);; Biological Process: glycolytic process (GO:0006096);;	K01689|0|bdi:100834645|K01689 enolase [EC:4.2.1.11] | (RefSeq) enolase 1	Glycolysis / Gluconeogenesis (ko00010);; Carbon metabolism (ko01200);; Biosynthesis of amino acids (ko01230);; RNA degradation (ko03018)	Enolase 1 OS=Zea mays OX=4577 GN=ENO1 PE=2 SV=1	enolase 1 isoform X2 [Aegilops tauschii subsp. tauschii]
Triticum_aestivum_newGene_42861	--	--	Biological Process: maturation of SSU-rRNA from tricistronic rRNA transcript (SSU-rRNA, 5.8S rRNA, LSU-rRNA) (GO:0000462);; Cellular Component: nucleolus (GO:0005730);; Cellular Component: small-subunit processome (GO:0032040);;	K14765|6.96252e-09|bdi:100825288|K14765 U3 small nucleolar ribonucleoprotein protein LCP5 | (RefSeq) neuroguidin	--	--	uncharacterized protein LOC109752524 isoform X5 [Aegilops tauschii subsp. tauschii]
Triticum_aestivum_newGene_69247	--	--	Cellular Component: integral component of membrane (GO:0016021);;	--	--	--	uncharacterized protein LOC109772818 isoform X2 [Aegilops tauschii subsp. tauschii]
TraesCS2B02G456000	--	--	Cellular Component: mitochondrion (GO:0005739);;	--	--	--	uncharacterized protein LOC109748506 [Aegilops tauschii subsp. tauschii]
TraesCS1B02G446500	--		Molecular Function: protein kinase activity (GO:0004672);; Molecular Function: ATP binding (GO:0005524);; Biological Process: protein phosphorylation (GO:0006468);;	--	--	Serine/threonine-protein kinase STY13 OS=Arabidopsis thaliana OX=3702 GN=STY13 PE=1 SV=2	serine/threonine-protein kinase STY8-like [Aegilops tauschii subsp. tauschii]
Triticum_aestivum_newGene_21625	[K]	Transcription	Cellular Component: membrane (GO:0016020);; Molecular Function: kinase activity (GO:0016301);; Biological Process: phosphorylation (GO:0016310);;	--	--	Receptor-like protein EIX2 OS=Solanum lycopersicum OX=4081 GN=EIX2 PE=1 SV=2	probable LRR receptor-like serine/threonine-protein kinase At1g34110 [Aegilops tauschii subsp. tauschii]
TraesCS6D02G222600	--	--	Molecular Function: transcription factor activity, sequence-specific DNA binding (GO:0003700);; Cellular Component: nucleus (GO:0005634);; Biological Process: regulation of transcription, DNA-templated (GO:0006355);; Molecular Function: sequence-specific DNA binding (GO:0043565);;	--	--	Homeobox-leucine zipper protein HOX24 OS=Oryza sativa subsp. indica OX=39946 GN=HOX24 PE=2 SV=2	homeobox-leucine zipper protein HOX24-like [Aegilops tauschii subsp. tauschii]
Triticum_aestivum_newGene_14237	--	--	Molecular Function: polysaccharide binding (GO:0030247);;	--	--	--	predicted protein [Hordeum vulgare subsp. vulgare]
Triticum_aestivum_newGene_101651	--	--	Biological Process: mRNA catabolic process (GO:0006402);; Cellular Component: CCR4-NOT complex (GO:0030014);;	--	--	--	hypothetical protein TRIUR3_27685 [Triticum urartu]
Triticum_aestivum_newGene_89441	--	--	Cellular Component: mitochondrion (GO:0005739);; Cellular Component: plastid (GO:0009536);; Biological Process: cellular metabolic process (GO:0044237);; Molecular Function: metal ion binding (GO:0046872);;	--	--	--	unnamed protein product [Triticum aestivum]
Triticum_aestivum_newGene_73187	--	--	--	--	--	--	pistil-specific extensin-like protein [Aegilops tauschii subsp. tauschii]
TraesCS2B02G348800	--	--	Cellular Component: cytoplasm (GO:0005737);; Biological Process: metal ion transport (GO:0030001);; Molecular Function: transition metal ion binding (GO:0046914);; Biological Process: cellular transition metal ion homeostasis (GO:0046916);;	--	--	Heavy metal-associated isoprenylated plant protein 41 OS=Arabidopsis thaliana OX=3702 GN=HIPP41 PE=3 SV=1	uncharacterized protein LOC109734222 [Aegilops tauschii subsp. tauschii]
TraesCS1A02G018000	[T]	Signal transduction mechanisms	Molecular Function: protein serine/threonine kinase activity (GO:0004674);; Molecular Function: protein tyrosine kinase activity (GO:0004713);; Molecular Function: ATP binding (GO:0005524);; Cellular Component: plasma membrane (GO:0005886);; Biological Process: protein phosphorylation (GO:0006468);; Cellular Component: integral component of membrane (GO:0016021);;	--	--	Rust resistance kinase Lr10 OS=Triticum aestivum OX=4565 GN=LRK10 PE=2 SV=1	resistance-related receptor-like kinase [Triticum aestivum]
TraesCS4A02G250400	--	--	--	--	--	--	predicted protein, partial [Hordeum vulgare subsp. vulgare]
TraesCS7B02G114700	--	--	Molecular Function: electron carrier activity (GO:0009055);; Cellular Component: integral component of membrane (GO:0016021);; Cellular Component: anchored component of plasma membrane (GO:0046658);;	--	--	Chemocyanin OS=Lilium longiflorum OX=4690 PE=1 SV=1	basic blue protein-like [Aegilops tauschii subsp. tauschii]
TraesCS2D02G474300	[K]	Transcription	Molecular Function: protein serine/threonine kinase activity (GO:0004674);; Molecular Function: ATP binding (GO:0005524);; Cellular Component: mitochondrion (GO:0005739);; Biological Process: protein phosphorylation (GO:0006468);; Cellular Component: integral component of membrane (GO:0016021);;	--	--	LRR receptor-like serine/threonine-protein kinase EFR OS=Arabidopsis thaliana OX=3702 GN=EFR PE=1 SV=1	receptor kinase-like protein Xa21 [Aegilops tauschii subsp. tauschii]
TraesCSU02G005100	[G]	Carbohydrate transport and metabolism	Biological Process: flavonoid biosynthetic process (GO:0009813);; Cellular Component: intracellular membrane-bounded organelle (GO:0043231);; Biological Process: flavonoid glucuronidation (GO:0052696);; Molecular Function: quercetin 3-O-glucosyltransferase activity (GO:0080043);; Molecular Function: quercetin 7-O-glucosyltransferase activity (GO:0080044);;	K13227|0|zma:100274317|K13227 UDP-glucosyltransferase BX8/BX9 [EC:2.4.1.202] | (RefSeq) bx9, GRMZM2G161335; benzoxazinone synthesis 9	Benzoxazinoid biosynthesis (ko00402)	DIMBOA UDP-glucosyltransferase BX9 OS=Zea mays OX=4577 GN=BX9 PE=1 SV=1	DIMBOA UDP-glucosyltransferase BX8 [Dichanthelium oligosanthes]
TraesCS3D02G367200	[C]	Energy production and conversion	Molecular Function: oxidoreductase activity, acting on CH-OH group of donors (GO:0016614);; Molecular Function: flavin adenine dinucleotide binding (GO:0050660);; Biological Process: oxidation-reduction process (GO:0055114);;	--	--	Reticuline oxidase OS=Papaver somniferum OX=3469 GN=BBE1 PE=2 SV=1	reticuline oxidase-like [Aegilops tauschii subsp. tauschii]
Triticum_aestivum_newGene_89457	--	--	--	--	--	--	unnamed protein product [Triticum aestivum]
TraesCS2B02G350600	[R]	General function prediction only	Molecular Function: GTP binding (GO:0005525);; Biological Process: small GTPase mediated signal transduction (GO:0007264);; Biological Process: protein transport (GO:0015031);; Cellular Component: endoplasmic reticulum-Golgi intermediate compartment membrane (GO:0033116);;	K07877|5.65e-136|bdi:100833955|K07877 Ras-related protein Rab-2A | (RefSeq) ras-related protein Rab-2-B	--	Ras-related protein Rab-2-B OS=Zea mays OX=4577 GN=RAB2B PE=2 SV=1	ras-related protein Rab-2-B [Aegilops tauschii subsp. tauschii]
TraesCS5D02G091000	[T]	Signal transduction mechanisms	Molecular Function: protein serine/threonine kinase activity (GO:0004674);; Molecular Function: ATP binding (GO:0005524);; Cellular Component: plasma membrane (GO:0005886);; Biological Process: protein phosphorylation (GO:0006468);; Cellular Component: integral component of membrane (GO:0016021);; Molecular Function: carbohydrate binding (GO:0030246);;	--	--	L-type lectin-domain containing receptor kinase S.4 OS=Arabidopsis thaliana OX=3702 GN=LECRKS4 PE=2 SV=1	L-type lectin-domain containing receptor kinase S.4-like [Aegilops tauschii subsp. tauschii]
Triticum_aestivum_newGene_32176	[K]	Transcription	Cellular Component: mitochondrion (GO:0005739);; Molecular Function: kinase activity (GO:0016301);; Biological Process: phosphorylation (GO:0016310);;	--	--	Probable leucine-rich repeat receptor-like protein kinase At1g35710 OS=Arabidopsis thaliana OX=3702 GN=At1g35710 PE=2 SV=1	LRR receptor-like serine/threonine-protein kinase EFR [Triticum urartu]
TraesCS5D02G082700	--	--	Molecular Function: nucleic acid binding (GO:0003676);; Molecular Function: metal ion binding (GO:0046872);;	--	--	Zinc finger protein ZAT10 OS=Arabidopsis thaliana OX=3702 GN=ZAT10 PE=2 SV=1	zinc finger protein 1-like [Aegilops tauschii subsp. tauschii]
TraesCS1B02G299100	--	--	--	--	--	--	hypothetical protein TRIUR3_16690 [Triticum urartu]
TraesCS6D02G080500	--	--	Molecular Function: calmodulin binding (GO:0005516);; Biological Process: response to stress (GO:0006950);;	--	--	Calmodulin-binding protein 60 D OS=Arabidopsis thaliana OX=3702 GN=CBP60D PE=2 SV=1	protein SAR DEFICIENT 1-like isoform X1 [Aegilops tauschii subsp. tauschii]
TraesCS2B02G389200	--	--	Biological Process: polysaccharide biosynthetic process (GO:0000271);; Cellular Component: Golgi apparatus (GO:0005794);; Molecular Function: transferase activity, transferring glycosyl groups (GO:0016757);;	--	--	Probable galacturonosyltransferase-like 3 OS=Arabidopsis thaliana OX=3702 GN=GATL3 PE=2 SV=1	probable galacturonosyltransferase-like 3 [Aegilops tauschii subsp. tauschii]
TraesCS7D02G444300	--	--	Biological Process: regulation of monopolar cell growth (GO:0051513);;	--	--	--	uncharacterized protein LOC109734720 [Aegilops tauschii subsp. tauschii]
Triticum_aestivum_newGene_47851	--	--	Biological Process: primary metabolic process (GO:0044238);; Biological Process: cellular macromolecule metabolic process (GO:0044260);;	--	--	--	uncharacterized protein LOC109763181 [Aegilops tauschii subsp. tauschii]
Triticum_aestivum_newGene_27958	--	--	--	--	--	--	protein FAR1-RELATED SEQUENCE 7-like [Aegilops tauschii subsp. tauschii]
Triticum_aestivum_newGene_69835	--	--	Molecular Function: microtubule motor activity (GO:0003777);; Molecular Function: ATP binding (GO:0005524);; Cellular Component: microtubule (GO:0005874);; Biological Process: microtubule-based movement (GO:0007018);; Molecular Function: microtubule binding (GO:0008017);;	--	--	Kinesin-like protein KIN-12A OS=Oryza sativa subsp. japonica OX=39947 GN=KIN12A PE=2 SV=2	uncharacterized protein LOC109766987 [Aegilops tauschii subsp. tauschii]
TraesCS2B02G203900	[R]	General function prediction only	Molecular Function: kinase activity (GO:0016301);; Biological Process: phosphorylation (GO:0016310);; Molecular Function: identical protein binding (GO:0042802);;	--	--	SNF1-related protein kinase regulatory subunit gamma-1-like OS=Arabidopsis thaliana OX=3702 GN=CBSCBS2 PE=1 SV=1	SNF1-related protein kinase regulatory subunit gamma-1-like [Aegilops tauschii subsp. tauschii]
TraesCS7A02G480100	[P]	Inorganic ion transport and metabolism	Molecular Function: nucleotide binding (GO:0000166);; Molecular Function: copper ion binding (GO:0005507);; Cellular Component: integral component of plasma membrane (GO:0005887);; Biological Process: copper ion transmembrane transport (GO:0035434);; Cellular Component: intracellular membrane-bounded organelle (GO:0043231);; Molecular Function: copper-transporting ATPase activity (GO:0043682);;	K17686|0|bdi:100843747|K17686 Cu+-exporting ATPase [EC:3.6.3.54] | (RefSeq) copper-transporting ATPase RAN1-like	--	Cation-transporting ATPase HMA5 OS=Oryza sativa subsp. japonica OX=39947 GN=HMA9 PE=2 SV=1	copper-transporting ATPase RAN1-like [Aegilops tauschii subsp. tauschii]
TraesCS1B02G384300	[QV]	Secondary metabolites biosynthesis, transport and catabolism;; Defense mechanisms	Molecular Function: iron ion binding (GO:0005506);; Biological Process: flavonoid biosynthetic process (GO:0009813);; Cellular Component: integral component of membrane (GO:0016021);; Molecular Function: oxidoreductase activity, acting on paired donors, with incorporation or reduction of molecular oxygen, NAD(P)H as one donor, and incorporation of one atom of oxygen (GO:0016709);; Molecular Funct…	--	--	Cytochrome P450 89A2 OS=Arabidopsis thaliana OX=3702 GN=CYP89A2 PE=2 SV=2	cytochrome P450 89A2-like [Aegilops tauschii subsp. tauschii]
Triticum_aestivum_newGene_71159	--	--	--	--	--	--	Coatomer subunit beta&apos;-2 [Dichanthelium oligosanthes]
TraesCS7D02G046100	[Q]	Secondary metabolites biosynthesis, transport and catabolism	Molecular Function: methyltransferase activity (GO:0008168);; Biological Process: methylation (GO:0032259);; Molecular Function: metal ion binding (GO:0046872);; Molecular Function: dioxygenase activity (GO:0051213);; Biological Process: oxidation-reduction process (GO:0055114);;	--	--	Protein SRG1 OS=Arabidopsis thaliana OX=3702 GN=SRG1 PE=2 SV=1	protein SRG1-like [Aegilops tauschii subsp. tauschii]
TraesCS3A02G229700	[M]	Cell wall/membrane/envelope biogenesis	Molecular Function: 3-beta-hydroxy-delta5-steroid dehydrogenase activity (GO:0003854);; Biological Process: steroid biosynthetic process (GO:0006694);; Biological Process: oxidation-reduction process (GO:0055114);;	--	--	Cinnamoyl-CoA reductase-like SNL6 OS=Oryza sativa subsp. japonica OX=39947 GN=SNL6 PE=3 SV=1	cinnamoyl-CoA reductase-like SNL6 [Aegilops tauschii subsp. tauschii]
TraesCS3B02G063700	--	--	Biological Process: lipid transport (GO:0006869);; Molecular Function: lipid binding (GO:0008289);;	--	--	Non-specific lipid-transfer protein 4.3 OS=Hordeum vulgare OX=4513 GN=LTP4.3 PE=2 SV=1	nonspecific lipid transfer protein 5 [Triticum aestivum]
TraesCS2D02G589600	[O]	Posttranslational modification, protein turnover, chaperones	Molecular Function: glutathione transferase activity (GO:0004364);; Cellular Component: cytoplasm (GO:0005737);; Biological Process: glutathione metabolic process (GO:0006749);; Biological Process: toxin catabolic process (GO:0009407);;	K00799|2.49309e-97|sita:101760610|K00799 glutathione S-transferase [EC:2.5.1.18] | (RefSeq) probable glutathione S-transferase	Glutathione metabolism (ko00480)	Glutathione S-transferase 3 OS=Glycine max OX=3847 GN=GST3 PE=1 SV=1	glutathione S-transferase 3-like [Aegilops tauschii subsp. tauschii]
TraesCS1A02G023200	--	--	Molecular Function: sulfotransferase activity (GO:0008146);;	--	--	Flavonol 3-sulfotransferase OS=Flaveria chlorifolia OX=4228 PE=1 SV=2	flavonol 3-sulfotransferase-like [Aegilops tauschii subsp. tauschii]
TraesCS1B02G189400	--	--	Cellular Component: extracellular region (GO:0005576);; Cellular Component: cell wall (GO:0005618);; Biological Process: proteolysis (GO:0006508);; Biological Process: lipid transport (GO:0006869);; Molecular Function: peptidase activity (GO:0008233);; Molecular Function: lipid binding (GO:0008289);; Biological Process: cell wall organization (GO:0071555);;	--	--	Non-specific lipid-transfer protein 2G OS=Triticum aestivum OX=4565 PE=1 SV=2	non-specific lipid-transfer protein 2P-like [Aegilops tauschii subsp. tauschii]
TraesCS5A02G356300	[I]	Lipid transport and metabolism	Biological Process: biosynthetic process (GO:0009058);; Cellular Component: plastid (GO:0009536);; Cellular Component: integral component of membrane (GO:0016021);; Molecular Function: transferase activity, transferring alkyl or aryl (other than methyl) groups (GO:0016765);;	K02291|1.37046e-153|bdi:100832896|K02291 15-cis-phytoene/all-trans-phytoene synthase [EC:2.5.1.32 2.5.1.99] | (RefSeq) phytoene synthase 2, chloroplastic-like	Carotenoid biosynthesis (ko00906)	Phytoene synthase, chloroplastic OS=Narcissus pseudonarcissus OX=39639 GN=PSY PE=2 SV=1	phytoene synthase 2, chloroplastic-like [Aegilops tauschii subsp. tauschii]
Triticum_aestivum_newGene_60535	--	--	Molecular Function: binding (GO:0005488);;	--	--	--	unknown [Aegilops tauschii]
Triticum_aestivum_newGene_90045	--	--	Molecular Function: structural constituent of ribosome (GO:0003735);; Biological Process: translation (GO:0006412);; Cellular Component: cytosolic large ribosomal subunit (GO:0022625);;	K02903|3.16908e-50|bdi:100823569|K02903 large subunit ribosomal protein L28e | (RefSeq) 60S ribosomal protein L28-1	Ribosome (ko03010)	60S ribosomal protein L28-2 OS=Arabidopsis thaliana OX=3702 GN=RPL28C PE=2 SV=1	uncharacterized protein LOC109784723 [Aegilops tauschii subsp. tauschii]
TraesCS1B02G274000	--	--	Molecular Function: DNA binding (GO:0003677);; Molecular Function: zinc ion binding (GO:0008270);;	--	--	Uncharacterized protein At5g08430 OS=Arabidopsis thaliana OX=3702 GN=At5g08430 PE=1 SV=2	uncharacterized protein At5g08430-like isoform X4 [Aegilops tauschii subsp. tauschii]
TraesCS1B02G224300	[G]	Carbohydrate transport and metabolism	Molecular Function: trehalose-phosphatase activity (GO:0004805);; Biological Process: trehalose biosynthetic process (GO:0005992);; Cellular Component: integral component of membrane (GO:0016021);; Biological Process: dephosphorylation (GO:0016311);;	K01087|0|bdi:100839839|K01087 trehalose 6-phosphate phosphatase [EC:3.1.3.12] | (RefSeq) probable trehalose-phosphate phosphatase 2	Starch and sucrose metabolism (ko00500)	Probable trehalose-phosphate phosphatase 2 OS=Oryza sativa subsp. japonica OX=39947 GN=TPP2 PE=1 SV=1	probable trehalose-phosphate phosphatase 2 isoform X1 [Aegilops tauschii subsp. tauschii]
Triticum_aestivum_newGene_70630	--	--	Biological Process: regulation of transcription, DNA-templated (GO:0006355);;	--	--	Protein FAR1-RELATED SEQUENCE 8 OS=Arabidopsis thaliana OX=3702 GN=FRS8 PE=2 SV=2	hypothetical protein TRIUR3_13794 [Triticum urartu]
Triticum_aestivum_newGene_57545	--	--	Molecular Function: kinase activity (GO:0016301);;	K17302|2.78178e-23|zma:103627012|K17302 coatomer subunit beta' | (RefSeq) GRMZM2G064558, GRMZM2G372812; uncharacterized LOC103627012	--	Coatomer subunit beta&apos;-1 OS=Oryza sativa subsp. japonica OX=39947 GN=Os06g0143900 PE=2 SV=1	uncharacterized protein LOC109761340 isoform X2 [Aegilops tauschii subsp. tauschii]
Triticum_aestivum_newGene_61336	--	--	--	--	--	--	--
TraesCS1B02G226000	[M]	Cell wall/membrane/envelope biogenesis	Cellular Component: extracellular region (GO:0005576);; Cellular Component: cell wall (GO:0005618);; Cellular Component: membrane (GO:0016020);; Biological Process: sexual reproduction (GO:0019953);; Biological Process: cell wall organization (GO:0071555);;	--	--	Expansin-B3 OS=Oryza sativa subsp. japonica OX=39947 GN=EXPB3 PE=2 SV=2	beta-expansin TaEXPB2 [Triticum aestivum]
TraesCS7D02G044500	[O]	Posttranslational modification, protein turnover, chaperones	Molecular Function: glutathione transferase activity (GO:0004364);; Cellular Component: cytoplasm (GO:0005737);; Biological Process: glutathione metabolic process (GO:0006749);; Biological Process: toxin catabolic process (GO:0009407);;	K00799|7.75826e-97|bdi:100841559|K00799 glutathione S-transferase [EC:2.5.1.18] | (RefSeq) probable glutathione S-transferase GSTU6	Glutathione metabolism (ko00480)	Probable glutathione S-transferase GSTU6 OS=Oryza sativa subsp. japonica OX=39947 GN=GSTU6 PE=2 SV=2	probable glutathione S-transferase GSTU6 [Aegilops tauschii subsp. tauschii]
Triticum_aestivum_newGene_100674	--	--	--	--	--	--	uncharacterized protein LOC109760313 [Aegilops tauschii subsp. tauschii]
Triticum_aestivum_newGene_68482	--	--	Biological Process: metabolic process (GO:0008152);; Molecular Function: oxidoreductase activity (GO:0016491);; Molecular Function: transition metal ion binding (GO:0046914);; Molecular Function: organic cyclic compound binding (GO:0097159);; Molecular Function: heterocyclic compound binding (GO:1901363);;	--	--	--	PREDICTED: uncharacterized protein LOC106866084 [Brachypodium distachyon]
TraesCS3B02G496200	[I]	Lipid transport and metabolism	Molecular Function: carboxylic ester hydrolase activity (GO:0052689);;	K08233|3.59292e-136|sbi:SORBI_03g045110|K08233 polyneuridine-aldehyde esterase [EC:3.1.1.78] | (RefSeq) SORBIDRAFT_03g045110, Sb03g045110; hypothetical protein	--	Probable esterase PIR7A OS=Oryza sativa subsp. japonica OX=39947 GN=PIR7A PE=3 SV=2	unnamed protein product [Triticum aestivum]
TraesCS5D02G060300	--	--	Molecular Function: protein dimerization activity (GO:0046983);;	K16189|1.07639e-85|sita:101780784|K16189 phytochrome-interacting factor 4 | (RefSeq) transcription factor PIF4-like	Plant hormone signal transduction (ko04075)	Transcription factor PIF3 OS=Arabidopsis thaliana OX=3702 GN=PIF3 PE=1 SV=1	transcription factor PIF4-like [Aegilops tauschii subsp. tauschii]
[truncated: 1,984 more rows]
