# Supplementary material for: Bulked Segregant RNA-Seq Provides Distinctive Expression Profile Against Powdery Mildew in the Wheat Genotype YD588
Source: Front Plant Sci. 2021 Dec 3;12:764978. doi: 10.3389/fpls.2021.764978 (PMC8677838; doi:10.3389/fpls.2021.764978)
Supplement: Supplementary file 7 [file Table_7.XLSX]

## Sheet: Table S7
Table S7. KEGG pathways involving the DEGs with consistent differences between the resistant parent YD588 and susceptible parent Yannong 21 (YN21) and their derived bulked pools.
#Kegg_pathway	ko_id	Cluter_frequency	Genome_frequency	P-value	Corrected_P-value	rich_factor	Genes
Isoquinoline alkaloid biosynthesis	ko00950	17 out of 549 3.09653916211293%	133 out of 20219 0.657797121519363%	1.24e-07	1.43e-05	4.70744	TraesCS1A02G050200;TraesCS1B02G089000;TraesCS1D02G052500;TraesCS1D02G073000;TraesCS2A02G468500;TraesCS2A02G516500;TraesCS2A02G516800;TraesCS2B02G354400;TraesCS2B02G491400;TraesCS2B02G545300;TraesCS2D02G075000;TraesCS2D02G468600;TraesCS2D02G518200;TraesCS2D02G518300;TraesCS6B02G017500;TraesCS6B02G194400;TraesCS7A02G387100
Glutathione metabolism	ko00480	36 out of 549 6.55737704918033%	506 out of 20219 2.50259656758494%	1.6e-07	1.84e-05	2.62023	TraesCS1A02G186100;TraesCS1B02G269100;TraesCS1D02G094700;TraesCS1D02G094900;TraesCS1D02G095400;TraesCS1D02G190200;TraesCS2A02G045400;TraesCS2B02G574500;TraesCS2D02G044100;TraesCS2D02G589600;TraesCS3A02G129800;TraesCS3A02G488200;TraesCS3B02G536100;TraesCS3D02G130700;TraesCS3D02G369600;TraesCS3D02G483000;TraesCS4A02G349700;TraesCS4A02G435300;TraesCS4B02G225200;TraesCS5A02G024100;TraesCS5B02G020700;…
alpha-Linolenic acid metabolism	ko00592	20 out of 549 3.64298724954463%	240 out of 20219 1.18700232454622%	9.67e-06	0.0011123	3.06906	TraesCS1A02G015800;TraesCS1B02G019800;TraesCS2B02G328100;TraesCS2D02G028600;TraesCS3A02G471100;TraesCS3B02G332700;TraesCS3D02G298200;TraesCS4A02G061800;TraesCS4A02G061900;TraesCS4A02G090200;TraesCS4A02G202200;TraesCS4B02G237500;TraesCS4D02G040800;TraesCS5B02G006500;TraesCS5D02G183700;TraesCS6A02G027900;TraesCS6B02G353200;TraesCS6D02G302300;TraesCS7B02G145200;Triticum_aestivum_newGene_25505
Galactose metabolism	ko00052	25 out of 549 4.55373406193078%	352 out of 20219 1.74093674266779%	1.31e-05	0.00150436	2.61568	TraesCS1D02G161900;TraesCS2A02G094700;TraesCS2A02G588300;TraesCS2B02G311900;TraesCS2B02G341200;TraesCS2B02G341400;TraesCS2B02G516700;TraesCS2D02G105500;TraesCS3A02G092800;TraesCS3D02G524600;TraesCS4A02G486000;TraesCS5D02G321100;TraesCS5D02G551900;TraesCS5D02G552000;TraesCS6A02G023200;TraesCS6A02G023300;TraesCS6B02G031600;TraesCS6D02G026400;TraesCS6D02G026500;TraesCS6D02G026600;TraesCS7A02G009800;…
Tyrosine metabolism	ko00350	18 out of 549 3.27868852459016%	216 out of 20219 1.0683020920916%	2.67e-05	0.00307261	3.06906	TraesCS1A02G050200;TraesCS1B02G089000;TraesCS1D02G052500;TraesCS1D02G073000;TraesCS2A02G468500;TraesCS2A02G516500;TraesCS2A02G516800;TraesCS2B02G354400;TraesCS2B02G491400;TraesCS2B02G545300;TraesCS2D02G075000;TraesCS2D02G468600;TraesCS2D02G518200;TraesCS2D02G518300;TraesCS4A02G202200;TraesCS6B02G017500;TraesCS6B02G194400;TraesCS7A02G387100
Photosynthesis - antenna proteins	ko00196	11 out of 549 2.00364298724954%	95 out of 20219 0.469855086799545%	5.32e-05	0.00612119	4.26439	TraesCS2A02G342600;TraesCS2B02G220100;TraesCS2B02G233400;TraesCS2B02G340300;TraesCS2D02G320900;TraesCS5A02G454300;TraesCS5D02G464800;TraesCS6B02G122800;TraesCS7A02G227100;TraesCS7A02G276400;TraesCS7D02G227300
Zeatin biosynthesis	ko00908	10 out of 549 1.82149362477231%	86 out of 20219 0.425342499629062%	0.000111647	0.0128394	4.28242	TraesCS2B02G428300;TraesCS2B02G428500;TraesCS2B02G428700;TraesCS2B02G428800;TraesCS2D02G407300;TraesCS3A02G263300;TraesCS3B02G128700;TraesCS3D02G111300;TraesCS3D02G263000;TraesCS7A02G467800
Diterpenoid biosynthesis	ko00904	12 out of 549 2.18579234972678%	123 out of 20219 0.608338691329937%	0.00013287	0.0152801	3.59305	TraesCS2B02G445100;TraesCS2B02G445200;TraesCS2B02G445300;TraesCS2B02G445400;TraesCS2B02G445500;TraesCS2B02G445700;TraesCS3A02G122600;TraesCS3A02G133400;TraesCS3B02G141800;TraesCS3B02G166100;TraesCS3D02G124500;TraesCS5D02G566200
ABC transporters	ko02010	10 out of 549 1.82149362477231%	98 out of 20219 0.484692615856373%	0.000330512	0.0380089	3.75804	TraesCS2A02G521400;TraesCS2B02G550700;TraesCS2D02G523100;TraesCS3A02G257500;TraesCS3B02G290300;TraesCS3D02G257500;TraesCS4D02G296900;TraesCS7B02G181700;TraesCS7D02G284100;Triticum_aestivum_newGene_8642
Starch and sucrose metabolism	ko00500	41 out of 549 7.46812386156648%	864 out of 20219 4.27320836836639%	0.000397562	0.0457197	1.74766	TraesCS1A02G210400;TraesCS1B02G224300;TraesCS1B02G274500;TraesCS1D02G213700;TraesCS2A02G039400;TraesCS2A02G588300;TraesCS2B02G129600;TraesCS2B02G145700;TraesCS2B02G274900;TraesCS2B02G309500;TraesCS2B02G311900;TraesCS2B02G516700;TraesCS2D02G381000;TraesCS3D02G440600;TraesCS3D02G524600;TraesCS4A02G486000;TraesCS4B02G009900;TraesCS5A02G389000;TraesCS5B02G202200;TraesCS5B02G497600;TraesCS5D02G302900;…
Valine, leucine and isoleucine degradation	ko00280	11 out of 549 2.00364298724954%	135 out of 20219 0.667688807557248%	0.00115515	0.132843	3.00086	TraesCS1A02G299100;TraesCS1B02G308900;TraesCS1D02G292100;TraesCS2B02G406900;TraesCS2D02G073400;TraesCS4A02G059800;TraesCS4B02G235400;TraesCS4B02G288100;TraesCS4D02G236800;TraesCS4D02G347100;TraesCSU02G066700
Phenylpropanoid biosynthesis	ko00940	50 out of 549 9.10746812386157%	1183 out of 20219 5.85093229140907%	0.00130147	0.14967	1.55658	TraesCS1D02G080800;TraesCS2A02G039400;TraesCS2A02G107600;TraesCS2A02G571500;TraesCS2B02G124300;TraesCS2B02G125800;TraesCS2B02G224300;TraesCS2B02G278500;TraesCS2B02G346800;TraesCS2B02G374600;TraesCS2B02G398400;TraesCS2B02G614400;TraesCS2B02G615800;TraesCS2D02G107500;TraesCS2D02G381000;TraesCS3A02G448400;TraesCS3B02G215500;TraesCS3B02G359400;TraesCS3D02G305400;TraesCS3D02G325300;TraesCS3D02G440600;…
Glyoxylate and dicarboxylate metabolism	ko00630	16 out of 549 2.9143897996357%	270 out of 20219 1.3353776151145%	0.00303727	0.349286	2.18245	TraesCS2A02G066800;TraesCS2A02G067300;TraesCS2A02G219100;TraesCS2A02G345500;TraesCS2A02G467700;TraesCS2B02G079300;TraesCS2B02G079400;TraesCS2B02G079500;TraesCS2B02G280600;TraesCS2B02G490700;TraesCS4D02G240700;TraesCS5D02G425100;TraesCS6D02G255200;Triticum_aestivum_newGene_43450;Triticum_aestivum_newGene_69151;Triticum_aestivum_newGene_77200
Terpenoid backbone biosynthesis	ko00900	13 out of 549 2.36794171220401%	200 out of 20219 0.989168603788516%	0.00332165	0.38199	2.39387	TraesCS1A02G384300;TraesCS2A02G501900;TraesCS2B02G239200;TraesCS2B02G530100;TraesCS2D02G423400;TraesCS2D02G575800;TraesCS3A02G181400;TraesCS4D02G347100;TraesCS5A02G269300;TraesCS5D02G277500;TraesCS6A02G277800;TraesCS6B02G306000;TraesCS7A02G248800
Cysteine and methionine metabolism	ko00270	20 out of 549 3.64298724954463%	392 out of 20219 1.93877046342549%	0.00548251	0.630488	1.87902	TraesCS1A02G181000;TraesCS1A02G299100;TraesCS1B02G089000;TraesCS1B02G199600;TraesCS1B02G308900;TraesCS1D02G073000;TraesCS1D02G184500;TraesCS1D02G292100;TraesCS2A02G076600;TraesCS2B02G414800;TraesCS2D02G075200;TraesCS4A02G059800;TraesCS4A02G256500;TraesCS4B02G235400;TraesCS4B02G288100;TraesCS4D02G236800;TraesCS6B02G116700;TraesCS6B02G194400;Triticum_aestivum_newGene_43450;Triticum_aestivum_newGene…
Phenylalanine, tyrosine and tryptophan biosynthesis	ko00400	10 out of 549 1.82149362477231%	165 out of 20219 0.816064098125525%	0.0148605	1	2.23205	TraesCS1B02G089000;TraesCS1D02G073000;TraesCS2B02G308400;TraesCS2B02G345400;TraesCS2B02G348500;TraesCS2D02G289900;TraesCS5D02G379700;TraesCS6B02G194400;TraesCS7B02G308800;Triticum_aestivum_newGene_93956
Pyruvate metabolism	ko00620	16 out of 549 2.9143897996357%	323 out of 20219 1.59750729511845%	0.0157331	1	1.82434	TraesCS2A02G076600;TraesCS2A02G345500;TraesCS2B02G406900;TraesCS2D02G075200;TraesCS3D02G239500;TraesCS4D02G018900;TraesCS5A02G454700;TraesCS5B02G464300;TraesCS5D02G465300;TraesCS6B02G116700;TraesCS7A02G238900;TraesCS7B02G103800;TraesCS7D02G199900;TraesCSU02G066700;Triticum_aestivum_newGene_21335;Triticum_aestivum_newGene_43450
Arachidonic acid metabolism	ko00590	4 out of 549 0.728597449908925%	45 out of 20219 0.222562935852416%	0.0333354	1	3.27367	TraesCS2B02G077200;TraesCS3B02G332700;TraesCS3D02G298200;TraesCS4D02G040800
Selenocompound metabolism	ko00450	6 out of 549 1.09289617486339%	89 out of 20219 0.44018002868589%	0.0341761	1	2.48284	TraesCS1A02G181000;TraesCS1B02G199600;TraesCS1D02G184500;TraesCS2B02G046500;TraesCS6B02G306300;TraesCS7A02G401200
Nitrogen metabolism	ko00910	10 out of 549 1.82149362477231%	193 out of 20219 0.954547702655918%	0.0384152	1	1.90823	TraesCS3A02G254000;TraesCS3B02G259300;TraesCS3D02G254900;TraesCS4B02G297300;TraesCS4D02G240700;TraesCS6B02G356800;TraesCS6B02G364600;Triticum_aestivum_newGene_67629;Triticum_aestivum_newGene_69151;Triticum_aestivum_newGene_8625
AGE-RAGE signaling pathway in diabetic complications	ko04933	3 out of 549 0.546448087431694%	33 out of 20219 0.163212819625105%	0.0595446	1	3.34807	TraesCS1A02G333600;TraesCS1D02G071800;Triticum_aestivum_newGene_1358
Linoleic acid metabolism	ko00591	5 out of 549 0.910746812386157%	79 out of 20219 0.390721598496464%	0.0636735	1	2.33094	TraesCS3B02G332700;TraesCS3D02G298200;TraesCS4D02G040800;TraesCS5B02G006500;TraesCS7B02G145200
Cutin, suberine and wax biosynthesis	ko00073	7 out of 549 1.27504553734062%	133 out of 20219 0.657797121519363%	0.0708211	1	1.93836	TraesCS1A02G150800;TraesCS1D02G147800;TraesCS2A02G367700;TraesCS4A02G304400;TraesCS4B02G006800;TraesCS4D02G008300;TraesCSU02G100500
Monobactam biosynthesis	ko00261	3 out of 549 0.546448087431694%	36 out of 20219 0.178050348681933%	0.0734857	1	3.06906	TraesCS2A02G397900;TraesCS2B02G046500;Triticum_aestivum_newGene_71028
Phenylalanine metabolism	ko00360	9 out of 549 1.63934426229508%	192 out of 20219 0.949601859636975%	0.0791117	1	1.72635	TraesCS1B02G089000;TraesCS1D02G073000;TraesCS2B02G224300;TraesCS2B02G354400;TraesCS2B02G398400;TraesCS2D02G075000;TraesCS3A02G327700;TraesCS6B02G194400;TraesCS7D02G483400
Alanine, aspartate and glutamate metabolism	ko00250	9 out of 549 1.63934426229508%	198 out of 20219 0.979276917750631%	0.0915062	1	1.67404	TraesCS1A02G299100;TraesCS1B02G308900;TraesCS1D02G292100;TraesCS2B02G280600;TraesCS4B02G288100;TraesCS4D02G240700;Triticum_aestivum_newGene_67629;Triticum_aestivum_newGene_69151;Triticum_aestivum_newGene_8625
Glycine, serine and threonine metabolism	ko00260	11 out of 549 2.00364298724954%	257 out of 20219 1.27108165586824%	0.0926987	1	1.57633	TraesCS1A02G299100;TraesCS1B02G308900;TraesCS1D02G292100;TraesCS2A02G410500;TraesCS2B02G280600;TraesCS2B02G354400;TraesCS2D02G075000;TraesCS2D02G326900;TraesCS4B02G288100;TraesCS7B02G400800;Triticum_aestivum_newGene_93956
Circadian rhythm - plant	ko04712	8 out of 549 1.45719489981785%	175 out of 20219 0.865522528314951%	0.104925	1	1.6836	TraesCS1D02G084200;TraesCS3B02G162000;TraesCS4A02G262900;TraesCS5D02G488600;TraesCS5D02G488700;TraesCS6A02G175800;TraesCS7B02G462100;TraesCS7B02G462200
Arginine biosynthesis	ko00220	6 out of 549 1.09289617486339%	125 out of 20219 0.618230377367822%	0.12527	1	1.76778	TraesCS2B02G280600;TraesCS2B02G433900;TraesCS4D02G240700;Triticum_aestivum_newGene_67629;Triticum_aestivum_newGene_69151;Triticum_aestivum_newGene_8625
Sesquiterpenoid and triterpenoid biosynthesis	ko00909	3 out of 549 0.546448087431694%	46 out of 20219 0.227508778871359%	0.128769	1	2.40188	TraesCS2D02G423400;TraesCS7B02G131400;TraesCS7D02G233100
Limonene and pinene degradation	ko00903	2 out of 549 0.364298724954463%	24 out of 20219 0.118700232454622%	0.137441	1	3.06906	TraesCS2B02G406900;TraesCSU02G066700
Ether lipid metabolism	ko00565	5 out of 549 0.910746812386157%	103 out of 20219 0.509421830951086%	0.148724	1	1.7878	TraesCS3A02G083200;TraesCS3B02G332700;TraesCS3D02G298200;TraesCS4D02G040800;TraesCS5D02G524600
Tropane, piperidine and pyridine alkaloid biosynthesis	ko00960	5 out of 549 0.910746812386157%	103 out of 20219 0.509421830951086%	0.148724	1	1.7878	TraesCS1B02G089000;TraesCS1D02G073000;TraesCS2B02G354400;TraesCS2D02G075000;TraesCS6B02G194400
Glycolysis / Gluconeogenesis	ko00010	19 out of 549 3.4608378870674%	544 out of 20219 2.69053860230476%	0.158731	1	1.2863	TraesCS2A02G076600;TraesCS2B02G341200;TraesCS2B02G341400;TraesCS2B02G406900;TraesCS2D02G075200;TraesCS3D02G239500;TraesCS4A02G202200;TraesCS4D02G018900;TraesCS5D02G189500;TraesCS6B02G116700;TraesCS7A02G238900;TraesCS7B02G103800;TraesCS7D02G071200;TraesCS7D02G199900;TraesCSU02G066700;Triticum_aestivum_newGene_10602;Triticum_aestivum_newGene_19860;Triticum_aestivum_newGene_69479;Triticum_aestivum_n…
Valine, leucine and isoleucine biosynthesis	ko00290	3 out of 549 0.546448087431694%	51 out of 20219 0.252237993966071%	0.160575	1	2.1664	TraesCS4A02G059800;TraesCS4B02G235400;TraesCS4D02G236800
Lysine biosynthesis	ko00300	3 out of 549 0.546448087431694%	52 out of 20219 0.257183836985014%	0.167201	1	2.12474	TraesCS2A02G397900;TraesCS4B02G264500;Triticum_aestivum_newGene_71028
Porphyrin and chlorophyll metabolism	ko00860	7 out of 549 1.27504553734062%	169 out of 20219 0.835847470201296%	0.177109	1	1.52545	TraesCS1A02G057200;TraesCS2A02G134000;TraesCS2B02G157600;TraesCS2D02G136200;TraesCS3A02G181400;TraesCS3D02G194300;Triticum_aestivum_newGene_62133
beta-Alanine metabolism	ko00410	6 out of 549 1.09289617486339%	139 out of 20219 0.687472179633018%	0.177519	1	1.58973	TraesCS2B02G354400;TraesCS2B02G406900;TraesCS2B02G490100;TraesCS2D02G075000;TraesCS6A02G299200;TraesCSU02G066700
Ubiquinone and other terpenoid-quinone biosynthesis	ko00130	7 out of 549 1.27504553734062%	170 out of 20219 0.840793313220238%	0.180735	1	1.51648	TraesCS1B02G089000;TraesCS1D02G073000;TraesCS4B02G305800;TraesCS6A02G413300;TraesCS6B02G194400;TraesCS7D02G483400;Triticum_aestivum_newGene_72018
Flavonoid biosynthesis	ko00941	10 out of 549 1.82149362477231%	270 out of 20219 1.3353776151145%	0.200788	1	1.36403	TraesCS1D02G450100;TraesCS2B02G374600;TraesCS3D02G325300;TraesCS5D02G488600;TraesCS5D02G488700;TraesCS6A02G022100;TraesCS6B02G322500;TraesCS6D02G241700;TraesCS7B02G462100;TraesCS7B02G462200
Carbon fixation in photosynthetic organisms	ko00710	10 out of 549 1.82149362477231%	272 out of 20219 1.34526930115238%	0.206888	1	1.354	TraesCS2A02G066800;TraesCS2A02G067300;TraesCS2B02G079300;TraesCS2B02G079400;TraesCS2B02G079500;TraesCS2B02G280600;TraesCS5D02G425100;Triticum_aestivum_newGene_21335;Triticum_aestivum_newGene_43450;Triticum_aestivum_newGene_77200
Amino sugar and nucleotide sugar metabolism	ko00520	18 out of 549 3.27868852459016%	540 out of 20219 2.67075523022899%	0.217985	1	1.22763	TraesCS1B02G368300;TraesCS1D02G249600;TraesCS2B02G129600;TraesCS2B02G369000;TraesCS2B02G369100;TraesCS3A02G260100;TraesCS3B02G267700;TraesCS3D02G528600;TraesCS4A02G173800;TraesCS5B02G497600;TraesCS5D02G321100;TraesCS7B02G370700;Triticum_aestivum_newGene_18945;Triticum_aestivum_newGene_53140;Triticum_aestivum_newGene_59111;Triticum_aestivum_newGene_61180;Triticum_aestivum_newGene_68447;Triticum_ae…
Other types of O-glycan biosynthesis	ko00514	1 out of 549 0.182149362477231%	9 out of 20219 0.0445125871704832%	0.219486	1	4.09209	Triticum_aestivum_newGene_9419
Fructose and mannose metabolism	ko00051	10 out of 549 1.82149362477231%	280 out of 20219 1.38483604530392%	0.23203	1	1.31531	TraesCS3A02G241000;TraesCS4A02G368600;TraesCS5B02G497600;TraesCS5B02G504000;Triticum_aestivum_newGene_10602;Triticum_aestivum_newGene_19860;Triticum_aestivum_newGene_69106;Triticum_aestivum_newGene_69479;Triticum_aestivum_newGene_71263;Triticum_aestivum_newGene_93156
Pantothenate and CoA biosynthesis	ko00770	4 out of 549 0.728597449908925%	92 out of 20219 0.455017557742717%	0.240243	1	1.60125	TraesCS4A02G059800;TraesCS4B02G235400;TraesCS4D02G236800;TraesCS6A02G299200
Inositol phosphate metabolism	ko00562	7 out of 549 1.27504553734062%	190 out of 20219 0.93971017359909%	0.259028	1	1.35685	TraesCS1D02G071800;TraesCS2B02G152700;TraesCS2B02G525900;TraesCS3A02G083200;TraesCS7A02G357800;Triticum_aestivum_newGene_1358;Triticum_aestivum_newGene_98636
Cyanoamino acid metabolism	ko00460	11 out of 549 2.00364298724954%	323 out of 20219 1.59750729511845%	0.263996	1	1.25423	TraesCS2A02G039400;TraesCS2D02G381000;TraesCS3D02G440600;TraesCS5A02G257100;TraesCS5A02G287700;TraesCS5A02G389000;TraesCS5D02G265700;TraesCS5D02G302900;TraesCS5D02G399000;TraesCS7A02G042600;TraesCS7D02G245000
Biosynthesis of amino acids	ko01230	27 out of 549 4.91803278688525%	875 out of 20219 4.32761264157476%	0.273203	1	1.13643	TraesCS1B02G089000;TraesCS1D02G073000;TraesCS2A02G397900;TraesCS2B02G280600;TraesCS2B02G308400;TraesCS2B02G345400;TraesCS2B02G348500;TraesCS2B02G433900;TraesCS2D02G289900;TraesCS3D02G239500;TraesCS4A02G059800;TraesCS4B02G235400;TraesCS4B02G264500;TraesCS4D02G018900;TraesCS4D02G236800;TraesCS4D02G240700;TraesCS5D02G379700;TraesCS6B02G194400;TraesCS7B02G308800;TraesCS7B02G400800;TraesCS7D02G071200;…
Glycosphingolipid biosynthesis - globo series	ko00603	2 out of 549 0.364298724954463%	38 out of 20219 0.187942034719818%	0.276079	1	1.93836	TraesCS1D02G161900;TraesCS2D02G105500
Propanoate metabolism	ko00640	4 out of 549 0.728597449908925%	99 out of 20219 0.489638458875315%	0.282136	1	1.48803	TraesCS2A02G076600;TraesCS2D02G073400;TraesCS2D02G075200;TraesCS6B02G116700
Stilbenoid, diarylheptanoid and gingerol biosynthesis	ko00945	5 out of 549 0.910746812386157%	135 out of 20219 0.667688807557248%	0.305009	1	1.36403	TraesCS2B02G374600;TraesCS3D02G325300;TraesCS6A02G022100;TraesCS6B02G322500;TraesCS6D02G241700
Plant hormone signal transduction	ko04075	30 out of 549 5.46448087431694%	998 out of 20219 4.93595133290469%	0.308023	1	1.10708	TraesCS1A02G411200;TraesCS1B02G141500;TraesCS1B02G356600;TraesCS1B02G424700;TraesCS1D02G084200;TraesCS2A02G286700;TraesCS2D02G000300;TraesCS2D02G285300;TraesCS3A02G121300;TraesCS3A02G275400;TraesCS3B02G140700;TraesCS4A02G326400;TraesCS5A02G049600;TraesCS5A02G239400;TraesCS5A02G439700;TraesCS5A02G439800;TraesCS5B02G442600;TraesCS5D02G060300;TraesCS5D02G388200;TraesCS5D02G446800;TraesCS5D02G446900;…
Thiamine metabolism	ko00730	2 out of 549 0.364298724954463%	42 out of 20219 0.207725406795588%	0.31647	1	1.75375	TraesCS1A02G384300;TraesCS2D02G575800
Glycerolipid metabolism	ko00561	8 out of 549 1.45719489981785%	238 out of 20219 1.17711063850833%	0.32015	1	1.23794	TraesCS1D02G161900;TraesCS2B02G406900;TraesCS2D02G105500;TraesCS3B02G067900;TraesCS3B02G332700;TraesCS3D02G298200;TraesCSU02G066700;Triticum_aestivum_newGene_53566
Sulfur relay system	ko04122	2 out of 549 0.364298724954463%	44 out of 20219 0.217617092833473%	0.336486	1	1.67404	Triticum_aestivum_newGene_14423;Triticum_aestivum_newGene_70527
Carotenoid biosynthesis	ko00906	4 out of 549 0.728597449908925%	111 out of 20219 0.548988575102626%	0.355913	1	1.32716	TraesCS5A02G356300;TraesCS5B02G375900;TraesCS6D02G377900;Triticum_aestivum_newGene_67460
Plant-pathogen interaction	ko04626	23 out of 549 4.18943533697632%	774 out of 20219 3.82808249666156%	0.358067	1	1.0944	TraesCS1A02G308700;TraesCS2A02G461800;TraesCS2A02G461900;TraesCS2B02G367500;TraesCS2B02G401300;TraesCS2B02G435600;TraesCS2B02G483400;TraesCS2B02G483500;TraesCS2D02G347500;TraesCS2D02G462000;TraesCS2D02G462100;TraesCS3B02G314000;TraesCS3D02G484900;TraesCS4B02G091600;TraesCS4B02G321800;TraesCS5A02G439700;TraesCS5A02G439800;TraesCS5A02G490200;TraesCS5B02G442600;TraesCS5D02G446800;TraesCS5D02G446900;…
Pentose and glucuronate interconversions	ko00040	7 out of 549 1.27504553734062%	219 out of 20219 1.08313962114842%	0.384892	1	1.17718	TraesCS1B02G274500;TraesCS2B02G172100;TraesCS2B02G406900;TraesCS6A02G076900;TraesCSU02G066700;Triticum_aestivum_newGene_35212;Triticum_aestivum_newGene_93156
Carbon metabolism	ko01200	28 out of 549 5.10018214936248%	966 out of 20219 4.77768435629853%	0.387957	1	1.0675	TraesCS2A02G066800;TraesCS2A02G067300;TraesCS2A02G219100;TraesCS2A02G345500;TraesCS2A02G467700;TraesCS2B02G079300;TraesCS2B02G079400;TraesCS2B02G079500;TraesCS2B02G280600;TraesCS2B02G490700;TraesCS2D02G255500;TraesCS3D02G239500;TraesCS4D02G018900;TraesCS5D02G425100;TraesCS6D02G255200;TraesCS7A02G238900;TraesCS7B02G103800;TraesCS7B02G400800;TraesCS7D02G071200;TraesCS7D02G199900;Triticum_aestivum_n…
Sphingolipid metabolism	ko00600	4 out of 549 0.728597449908925%	123 out of 20219 0.608338691329937%	0.429669	1	1.19768	TraesCS1D02G161900;TraesCS2D02G105500;TraesCS7D02G316700;Triticum_aestivum_newGene_73497
Benzoxazinoid biosynthesis	ko00402	1 out of 549 0.182149362477231%	22 out of 20219 0.108808546416737%	0.454437	1	1.67404	TraesCSU02G005100
Peroxisome	ko04146	9 out of 549 1.63934426229508%	310 out of 20219 1.5332113358722%	0.466713	1	1.06922	TraesCS2A02G467700;TraesCS2B02G198100;TraesCS2B02G490700;TraesCS4A02G304400;TraesCS4B02G006800;TraesCS4D02G008300;TraesCS5D02G420300;TraesCSU02G100500;Triticum_aestivum_newGene_68267
Mismatch repair	ko03430	6 out of 549 1.09289617486339%	205 out of 20219 1.01389781888323%	0.48421	1	1.07792	TraesCS1D02G086400;TraesCS2B02G419300;TraesCS3A02G500600;TraesCS3D02G507500;Triticum_aestivum_newGene_23421;Triticum_aestivum_newGene_58419
Synthesis and degradation of ketone bodies	ko00072	1 out of 549 0.182149362477231%	25 out of 20219 0.123646075473564%	0.49773	1	1.47315	TraesCS4D02G347100
Tryptophan metabolism	ko00380	6 out of 549 1.09289617486339%	216 out of 20219 1.0683020920916%	0.535101	1	1.02302	TraesCS2B02G406900;TraesCS3A02G093000;TraesCS5A02G428000;TraesCS5D02G436000;TraesCS5D02G436200;TraesCSU02G066700
Ascorbate and aldarate metabolism	ko00053	4 out of 549 0.728597449908925%	144 out of 20219 0.712201394727731%	0.551892	1	1.02302	TraesCS2B02G406900;TraesCS6A02G412900;TraesCS7A02G357800;TraesCSU02G066700
Citrate cycle (TCA cycle)	ko00020	5 out of 549 0.910746812386157%	186 out of 20219 0.91992680152332%	0.571652	1	0.990021	TraesCS2D02G255500;TraesCS7A02G238900;TraesCS7B02G103800;TraesCS7D02G199900;Triticum_aestivum_newGene_43450
Phosphatidylinositol signaling system	ko04070	6 out of 549 1.09289617486339%	227 out of 20219 1.12270636529997%	0.583755	1	0.973448	TraesCS1A02G308700;TraesCS1D02G071800;TraesCS2B02G152700;TraesCS2B02G525900;Triticum_aestivum_newGene_1358;Triticum_aestivum_newGene_98636
Other glycan degradation	ko00511	2 out of 549 0.364298724954463%	74 out of 20219 0.365992383401751%	0.600739	1	0.995372	TraesCS7D02G316700;Triticum_aestivum_newGene_73497
Butanoate metabolism	ko00650	2 out of 549 0.364298724954463%	75 out of 20219 0.370938226420693%	0.608066	1	0.982101	TraesCS3A02G327700;TraesCS4D02G347100
Histidine metabolism	ko00340	2 out of 549 0.364298724954463%	78 out of 20219 0.385775755477521%	0.629431	1	0.944328	TraesCS2B02G406900;TraesCSU02G066700
2-Oxocarboxylic acid metabolism	ko01210	5 out of 549 0.910746812386157%	199 out of 20219 0.984222760769573%	0.631425	1	0.925346	TraesCS2B02G280600;TraesCS2B02G433900;TraesCS4A02G059800;TraesCS4B02G235400;TraesCS4D02G236800
Fatty acid degradation	ko00071	4 out of 549 0.728597449908925%	160 out of 20219 0.791334883030813%	0.635006	1	0.920719	TraesCS2B02G406900;TraesCS4A02G202200;TraesCS5D02G420300;TraesCSU02G066700
Vitamin B6 metabolism	ko00750	1 out of 549 0.182149362477231%	37 out of 20219 0.182996191700875%	0.639211	1	0.995372	TraesCS3A02G215400
Glycerophospholipid metabolism	ko00564	9 out of 549 1.63934426229508%	360 out of 20219 1.78050348681933%	0.646028	1	0.920719	TraesCS1A02G369600;TraesCS1D02G375600;TraesCS1D02G389300;TraesCS3A02G083200;TraesCS3A02G258800;TraesCS3B02G332700;TraesCS3D02G298200;TraesCS4D02G040800;TraesCS5D02G524600
Arginine and proline metabolism	ko00330	5 out of 549 0.910746812386157%	214 out of 20219 1.05841040605371%	0.693715	1	0.860486	TraesCS2B02G406900;TraesCS2B02G490100;TraesCS5B02G336200;TraesCS5D02G342000;TraesCSU02G066700
Glycosylphosphatidylinositol(GPI)-anchor biosynthesis	ko00563	2 out of 549 0.364298724954463%	88 out of 20219 0.435234185666947%	0.694093	1	0.837018	TraesCS2B02G389300;TraesCS2B02G481700
Sulfur metabolism	ko00920	3 out of 549 0.546448087431694%	131 out of 20219 0.647905435481478%	0.694339	1	0.843407	TraesCS2B02G046500;Triticum_aestivum_newGene_70527;Triticum_aestivum_newGene_98636
Steroid biosynthesis	ko00100	4 out of 549 0.728597449908925%	183 out of 20219 0.905089272466492%	0.7357	1	0.805001	TraesCS3B02G332700;TraesCS3D02G298200;TraesCS5A02G004500;TraesCS7B02G484200
Flavone and flavonol biosynthesis	ko00944	1 out of 549 0.182149362477231%	49 out of 20219 0.242346307928186%	0.74089	1	0.751608	TraesCS1D02G450100
Nucleotide excision repair	ko03420	6 out of 549 1.09289617486339%	269 out of 20219 1.33043177209555%	0.741918	1	0.82146	TraesCS1D02G086400;TraesCS2B02G419300;Triticum_aestivum_newGene_23421;Triticum_aestivum_newGene_5439;Triticum_aestivum_newGene_58419;Triticum_aestivum_newGene_69037
Monoterpenoid biosynthesis	ko00902	1 out of 549 0.182149362477231%	54 out of 20219 0.267075523022899%	0.774288	1	0.682014	TraesCS2B02G388700
Photosynthesis	ko00195	12 out of 549 2.18579234972678%	532 out of 20219 2.63118848607745%	0.782828	1	0.830724	TraesCS2B02G133500;TraesCS2B02G228300;TraesCS2B02G272300;TraesCS2D02G573000;TraesCS5D02G007900;TraesCS6A02G374400;Triticum_aestivum_newGene_10624;Triticum_aestivum_newGene_20922;Triticum_aestivum_newGene_20926;Triticum_aestivum_newGene_50500;Triticum_aestivum_newGene_87592;Triticum_aestivum_newGene_87596
Fatty acid elongation	ko00062	5 out of 549 0.910746812386157%	240 out of 20219 1.18700232454622%	0.783684	1	0.767266	TraesCS2B02G269300;TraesCS2B02G427700;TraesCS4A02G007400;TraesCS4D02G242200;TraesCS6A02G293700
Folate biosynthesis	ko00790	1 out of 549 0.182149362477231%	56 out of 20219 0.276967209060784%	0.786412	1	0.657657	Triticum_aestivum_newGene_100049
SNARE interactions in vesicular transport	ko04130	3 out of 549 0.546448087431694%	153 out of 20219 0.756713981898215%	0.788756	1	0.722133	TraesCS2B02G219800;Triticum_aestivum_newGene_68381;Triticum_aestivum_newGene_8005
Brassinosteroid biosynthesis	ko00905	1 out of 549 0.182149362477231%	59 out of 20219 0.291804738117612%	0.803389	1	0.624217	TraesCS4B02G234100
DNA replication	ko03030	5 out of 549 0.910746812386157%	249 out of 20219 1.2315149117167%	0.809603	1	0.739534	TraesCS1D02G086400;TraesCS2B02G419300;Triticum_aestivum_newGene_23421;Triticum_aestivum_newGene_5439;Triticum_aestivum_newGene_58419
Proteasome	ko03050	5 out of 549 0.910746812386157%	250 out of 20219 1.23646075473564%	0.812324	1	0.736576	TraesCS2B02G499600;TraesCS2B02G524100;TraesCS7A02G294600;Triticum_aestivum_newGene_20958;Triticum_aestivum_newGene_4799
Regulation of autophagy	ko04140	2 out of 549 0.364298724954463%	114 out of 20219 0.563826104159454%	0.819496	1	0.646119	TraesCS2B02G371600;Triticum_aestivum_newGene_76687
RNA degradation	ko03018	9 out of 549 1.63934426229508%	442 out of 20219 2.18606261437262%	0.851529	1	0.749907	TraesCS2B02G332400;TraesCS2B02G443100;TraesCS2D02G246100;TraesCS5B02G329500;TraesCS7D02G071200;Triticum_aestivum_newGene_19860;Triticum_aestivum_newGene_69219;Triticum_aestivum_newGene_69479;Triticum_aestivum_newGene_71263
mRNA surveillance pathway	ko03015	8 out of 549 1.45719489981785%	407 out of 20219 2.01295810870963%	0.866176	1	0.723907	TraesCS2B02G186600;TraesCS2B02G362000;TraesCS3B02G096600;TraesCS6A02G404700;TraesCS6D02G388000;TraesCSU02G051800;Triticum_aestivum_newGene_22622;Triticum_aestivum_newGene_88814
Pentose phosphate pathway	ko00030	4 out of 549 0.728597449908925%	229 out of 20219 1.13259805133785%	0.872171	1	0.643297	Triticum_aestivum_newGene_10602;Triticum_aestivum_newGene_19860;Triticum_aestivum_newGene_69479;Triticum_aestivum_newGene_71263
Lysine degradation	ko00310	2 out of 549 0.364298724954463%	146 out of 20219 0.722093080765617%	0.909602	1	0.504504	TraesCS2B02G406900;TraesCSU02G066700
N-Glycan biosynthesis	ko00510	2 out of 549 0.364298724954463%	149 out of 20219 0.736930609822444%	0.915433	1	0.494346	TraesCS2B02G410300;TraesCS6A02G419100
Endocytosis	ko04144	10 out of 549 1.82149362477231%	565 out of 20219 2.79440130570256%	0.945356	1	0.651837	TraesCS2B02G123100;TraesCS2B02G152700;TraesCS2B02G461300;TraesCS3A02G240000;TraesCS3A02G245300;TraesCS5A02G315700;TraesCS5B02G316300;TraesCS5D02G321800;TraesCS5D02G524600;Triticum_aestivum_newGene_68474
Phagosome	ko04145	5 out of 549 0.910746812386157%	336 out of 20219 1.66180325436471%	0.952553	1	0.548047	TraesCS1A02G333600;TraesCS3D02G393200;TraesCSU02G137900;Triticum_aestivum_newGene_68381;Triticum_aestivum_newGene_76392
RNA transport	ko03013	11 out of 549 2.00364298724954%	631 out of 20219 3.12082694495277%	0.958322	1	0.642023	TraesCS2B02G186600;TraesCS2B02G289200;TraesCS2B02G413400;TraesCS2B02G498100;Triticum_aestivum_newGene_23807;Triticum_aestivum_newGene_24296;Triticum_aestivum_newGene_3307;Triticum_aestivum_newGene_43913;Triticum_aestivum_newGene_46760;Triticum_aestivum_newGene_64701;Triticum_aestivum_newGene_76945
Pyrimidine metabolism	ko00240	9 out of 549 1.63934426229508%	550 out of 20219 2.72021366041842%	0.964963	1	0.602653	TraesCS1B02G134500;TraesCS2D02G246100;TraesCS3D02G448000;TraesCS4D02G357100;TraesCS6A02G299200;TraesCS6B02G306300;TraesCS7A02G160900;Triticum_aestivum_newGene_3476;Triticum_aestivum_newGene_5439
RNA polymerase	ko03020	2 out of 549 0.364298724954463%	191 out of 20219 0.944656016618033%	0.967595	1	0.385642	TraesCS1B02G134500;TraesCS3D02G448000
Biosynthesis of unsaturated fatty acids	ko01040	2 out of 549 0.364298724954463%	192 out of 20219 0.949601859636975%	0.968343	1	0.383633	TraesCS2B02G269300;TraesCS2B02G427700
Homologous recombination	ko03440	3 out of 549 0.546448087431694%	261 out of 20219 1.29086502794401%	0.974351	1	0.423319	TraesCS1D02G086400;Triticum_aestivum_newGene_23421;Triticum_aestivum_newGene_58419
Basal transcription factors	ko03022	2 out of 549 0.364298724954463%	219 out of 20219 1.08313962114842%	0.983268	1	0.336336	TraesCS2D02G343800;Triticum_aestivum_newGene_69037
Base excision repair	ko03410	1 out of 549 0.182149362477231%	160 out of 20219 0.791334883030813%	0.987992	1	0.23018	Triticum_aestivum_newGene_5439
Fatty acid biosynthesis	ko00061	1 out of 549 0.182149362477231%	162 out of 20219 0.801226569068698%	0.98864	1	0.227338	TraesCS5D02G420300
Purine metabolism	ko00230	9 out of 549 1.63934426229508%	654 out of 20219 3.23458133438845%	0.993179	1	0.506818	TraesCS1B02G134500;TraesCS2B02G046500;TraesCS2D02G246100;TraesCS3D02G239500;TraesCS3D02G448000;TraesCS4D02G018900;TraesCS4D02G357100;TraesCS7A02G160900;Triticum_aestivum_newGene_5439
Spliceosome	ko03040	11 out of 549 2.00364298724954%	790 out of 20219 3.90721598496464%	0.99612	1	0.512806	TraesCS1B02G130200;TraesCS2B02G186600;TraesCS2B02G259400;TraesCS2B02G267700;TraesCS3A02G389800;TraesCS3D02G379900;Triticum_aestivum_newGene_55344;Triticum_aestivum_newGene_64701;Triticum_aestivum_newGene_68474;Triticum_aestivum_newGene_72352;Triticum_aestivum_newGene_76956
Aminoacyl-tRNA biosynthesis	ko00970	2 out of 549 0.364298724954463%	309 out of 20219 1.52826549285326%	0.998153	1	0.238374	TraesCS4B02G308900;TraesCS7A02G401200
Ribosome biogenesis in eukaryotes	ko03008	3 out of 549 0.546448087431694%	381 out of 20219 1.88436619021712%	0.998228	1	0.28999	TraesCS2B02G289200;TraesCS6B02G072400;Triticum_aestivum_newGene_3307
Fatty acid metabolism	ko01212	2 out of 549 0.364298724954463%	327 out of 20219 1.61729066719422%	0.998824	1	0.225252	TraesCS2B02G269300;TraesCS5D02G420300
Ubiquitin mediated proteolysis	ko04120	7 out of 549 1.27504553734062%	663 out of 20219 3.27909392155893%	0.999195	1	0.388841	TraesCS1D02G142100;TraesCS2B02G220200;TraesCS2B02G327800;TraesCS2B02G413400;Triticum_aestivum_newGene_69051;Triticum_aestivum_newGene_69586;Triticum_aestivum_newGene_74736
Protein export	ko03060	1 out of 549 0.182149362477231%	274 out of 20219 1.35516098719027%	0.999497	1	0.134412	TraesCS2B02G490800
Oxidative phosphorylation	ko00190	8 out of 549 1.45719489981785%	925 out of 20219 4.57490479252189%	0.999987	1	0.318519	TraesCS2B02G189900;TraesCS2D02G255500;TraesCS3A02G534500;TraesCS3B02G188900;TraesCS3B02G611600;TraesCS4A02G282900;TraesCS6A02G202900;TraesCS6D02G344000
Protein processing in endoplasmic reticulum	ko04141	6 out of 549 1.09289617486339%	933 out of 20219 4.61447153667343%	0.999999	1	0.236841	TraesCS3D02G393200;TraesCS5B02G054600;TraesCS6B02G005100;Triticum_aestivum_newGene_58198;Triticum_aestivum_newGene_67394;Triticum_aestivum_newGene_68474
Ribosome	ko03010	8 out of 549 1.45719489981785%	1376 out of 20219 6.80547999406499%	1	1	0.214121	TraesCS2B02G081600;TraesCS3B02G188600;TraesCS3D02G535900;Triticum_aestivum_newGene_35562;Triticum_aestivum_newGene_45097;Triticum_aestivum_newGene_58489;Triticum_aestivum_newGene_70366;Triticum_aestivum_newGene_90045
